# Supplementary material for: Characterization of particle-associated and free-living bacterial and archaeal communities along the water columns of the South China Sea
Source: Copernicus journal article supplement (doi:10.5194/bg-2020-115), 2020-04-14
Supplement: Supplementary file 2 [file 03 Supplementary_Table S1.xlsx]

## Sheet: OTU_table_Bacteria
OTUId	G3F50	G3F200	G3F1000	G3F2000	G3F3000	G3F4000	G3P50	G3P200	G3P1000	G3P2000	G3P3000	G3P4000	J5F50	J5F200	J5F1000	J5F2000	J5F3000	J5F4000	J5P50	J5P200	J5P1000	J5P2000	J5P3000	J5P4000
OTU_3	414	64	95	394	1643	1300	27	195	186	45	68	436	159	11	47	274	232	240	1006	121	109	142	89	141
OTU_15	1572	36	147	14	75	128	172	169	218	21	3	19	1309	290	26	41	22	60	412	19	15	0	74	1093
OTU_266	2046	1	11	1	7	5	214	0	7	0	0	8	470	12	3	3	0	0	42	0	0	0	0	3
OTU_134	19	0	1	0	2	1	0	2	9	0	0	0	16	11	0	0	1	1	148	8	8	0	0	87
OTU_76	377	743	220	10	93	122	43	15	85	8	5	2	82	510	236	14	33	62	37	29	10	0	14	24
OTU_20	380	4	5	1	19	10	0	0	4	0	3	9	4	3	18	85	52	17	16	12	5	0	12	0
OTU_300	244	16	23	0	2	5	27	8	6	0	0	0	27	33	4	2	3	5	63	3	3	0	1	2
OTU_504	10	0	0	0	0	0	0	1	5	0	0	0	2	0	0	0	0	0	17	0	0	0	0	7
OTU_171	95	3	5	0	4	14	26	17	12	0	0	1	61	8	1	1	1	3	74	7	0	0	0	4
OTU_38	358	372	223	15	18	75	39	13	65	3	1	4	94	259	248	13	21	47	41	47	18	0	0	7
OTU_2872	181	163	44	0	7	18	36	8	8	0	2	2	53	176	67	2	3	9	20	14	4	0	0	7
OTU_4212	41	32	8	0	1	1	9	0	8	0	0	0	13	29	9	1	2	3	7	3	1	0	3	2
OTU_80	83	17	5	15	3	6	5	21	3	0	1	7	33	1	0	1	3	0	26	1	0	1	0	36
OTU_202	58	0	0	0	0	1	0	0	0	0	0	0	0	0	0	0	0	0	0	0	0	0	2	0
OTU_97	69	64	1	4	0	7	1	12	4	0	0	0	32	47	1	0	0	14	64	31	0	0	18	68
OTU_1	282	64	143	137	330	155	3	575	1966	766	496	1329	28	27	212	696	428	162	2257	1296	2568	0	1554	2432
OTU_2835	26	2	2	1	0	0	1	0	2	0	0	0	5	5	1	0	0	0	0	0	0	0	0	0
OTU_106	157	0	2	0	0	0	2	0	4	0	0	0	1	2	0	0	1	0	1	1	0	0	0	1
OTU_1742	8	0	0	0	0	2	0	0	0	0	0	0	0	0	0	0	0	2	0	0	0	0	0	0
OTU_587	9	0	0	0	0	0	0	0	0	0	0	0	0	0	0	0	0	0	0	0	0	0	0	0
OTU_123	113	14	0	0	0	0	2	0	0	0	0	0	0	9	0	0	0	0	0	0	0	0	0	0
OTU_169	54	0	0	0	0	0	7	0	0	0	0	0	7	1	0	0	0	2	12	0	0	0	1	0
OTU_1084	4	0	0	0	0	0	0	0	0	0	0	0	2	0	0	0	0	0	0	0	0	0	0	1
OTU_695	2	0	0	0	0	0	0	1	0	34	5	1	0	0	0	1	2	1	6	14	38	1	4	6
OTU_1267	53	4	4	3	1	4	1	19	28	0	2	1	0	2	0	0	1	0	113	6	0	0	1	0
OTU_1688	9	0	0	0	0	0	3	0	0	0	0	0	1	0	0	0	0	0	0	0	0	0	0	0
OTU_163	8	1	19	12	30	7	5	23	40	5	0	0	1	3	5	21	8	7	8	17	34	0	6	10
OTU_5985	102	5	1	0	0	0	17	0	0	0	0	1	94	1	0	0	0	1	1	0	0	0	0	0
OTU_453	15	39	1	0	0	1	30	4	1	0	0	0	271	15	1	12	0	0	7	0	0	0	0	15
OTU_56	1858	0	4	0	2	10	201	1	1	0	0	4	732	6	0	3	0	1	28	4	0	0	0	13
OTU_17	175	15	42	24	164	98	1	27	75	22	24	33	0	0	1	12	50	12	38	27	57	0	50	46
OTU_621	4	0	0	0	0	0	0	1	2	0	0	0	0	0	0	0	0	0	0	0	0	0	0	12
OTU_3962	108	21	61	67	141	141	0	40	69	13	16	31	0	0	1	0	2	1	0	0	0	0	0	6
OTU_322	192	6	0	0	0	0	4	3	0	0	0	5	7	4	0	0	0	0	1	0	0	0	0	20
OTU_379	40	0	0	0	1	0	0	3	6	0	0	2	6	2	1	0	0	0	1	0	0	0	0	0
OTU_39	139	11	2	9	7	3	82	6	14	5	0	2	142	5	1	4	2	5	14	0	0	0	5	13
OTU_1760	2	5	17	1	3	17	0	0	36	1	2	1	6	14	31	3	9	20	3	0	1	0	4	20
OTU_25	1033	24	0	0	3	3	273	1	1	0	0	8	1156	25	1	0	0	0	38	0	0	0	9	8
OTU_507	42	0	9	0	3	5	5	5	12	0	0	0	2	10	0	0	0	1	18	1	0	0	0	2
OTU_821	72	114	12	0	1	3	4	2	2	0	0	1	22	55	5	0	2	2	11	15	1	0	0	5
OTU_6003	59	0	0	0	0	0	25	0	0	0	0	0	45	1	0	0	0	0	1	0	0	0	0	0
OTU_1170	4	0	0	0	0	0	0	0	0	0	0	1	0	0	0	0	0	0	0	0	0	0	1	0
OTU_198	11	3	3	24	42	17	2	6	31	6	13	48	29	8	4	15	11	5	42	106	15	4	8	17
OTU_217	85	0	1	0	2	2	10	0	0	0	0	0	5	0	0	3	0	3	10	0	0	0	0	0
OTU_317	32	0	1	0	2	0	5	1	0	0	0	0	10	8	0	2	0	1	18	0	0	0	2	3
OTU_901	4	0	0	0	0	0	0	0	0	0	0	0	0	0	0	0	0	0	0	0	0	0	0	0
OTU_51	83	12	2	1	4	3	18	0	0	0	0	0	41	15	0	0	0	0	13	0	0	0	0	26
OTU_5242	2	47	51	4	4	16	0	0	3	0	0	0	0	38	56	6	8	6	0	1	0	0	1	0
OTU_60	130	6	24	27	23	22	12	170	92	14	0	15	0	2	0	0	2	5	0	2	3	0	0	2
OTU_427	148	0	0	0	0	1	17	0	0	0	0	1	23	0	0	0	1	2	2	0	0	0	0	0
OTU_1249	86	1	7	1	7	11	177	1	1	1	0	1	1601	9	1	12	5	17	122	0	0	0	4	8
OTU_250	84	0	1	0	0	0	0	0	1	0	0	1	3	1	1	0	0	0	5	0	0	0	0	0
OTU_220	14	0	0	0	0	0	0	0	3	0	0	0	3	0	0	0	0	0	5	0	0	0	0	22
OTU_4267	349	0	1	0	0	3	52	0	0	0	0	2	300	3	0	2	1	0	9	0	0	0	0	3
OTU_170	80	0	1	0	0	0	3	1	1	0	0	0	12	1	0	0	0	0	2	0	0	0	0	15
OTU_2281	42	35	5	0	0	0	3	1	3	0	0	0	5	12	0	0	0	1	5	1	1	0	2	4
OTU_12	7	1	0	176	265	374	0	8	7	85	68	506	0	0	5	197	190	88	0	0	0	2	105	161
OTU_180	13	0	2	0	1	0	0	0	3	12	0	0	1	0	0	0	0	0	25	0	0	0	0	0
OTU_2861	2	0	0	1	1	1	0	4	7	1	3	5	0	0	1	4	0	0	10	8	8	0	1	6
OTU_1822	1	0	0	0	0	0	0	0	0	0	0	0	2	2	0	0	0	0	0	0	0	0	0	0
OTU_5436	19	1	0	0	0	0	7	0	0	0	0	0	33	0	0	0	0	0	0	0	0	0	0	0
OTU_622	7	0	0	0	0	1	0	0	9	0	0	0	3	0	0	0	0	2	0	1	0	0	0	0
OTU_466	95	0	1	0	0	2	4	1	0	0	0	1	13	0	0	0	0	1	0	0	0	0	0	11
OTU_6616	94	0	0	0	0	0	9	0	0	0	0	0	33	0	0	0	0	0	2	0	0	0	0	0
OTU_2061	42	1	3	0	0	1	6	4	6	0	0	0	45	8	0	0	0	1	4	0	0	0	1	15
OTU_229	21	0	3	0	0	0	42	0	0	0	0	0	54	3	0	5	1	1	11	0	0	0	0	36
OTU_1889	10	0	0	0	0	0	0	0	0	0	0	0	0	0	1	0	0	0	0	0	0	0	0	0
OTU_221	16	996	8	0	2	2	1	1	2	0	0	0	10	1054	15	1	0	0	3	20	0	0	0	18
OTU_603	17	50	8	0	3	4	0	0	4	0	0	0	2	37	5	0	2	10	0	0	0	0	1	13
OTU_8	24	0	0	277	158	69	1	1	7	174	103	146	0	0	2	108	72	77	2	2	194	919	84	244
OTU_61	10	19	6	0	2	3	3	39	5	0	0	2	30	1	0	1	0	1	243	5	1	0	0	2
OTU_1099	7	0	0	0	0	0	0	0	0	0	0	0	0	0	0	0	0	0	3	0	0	0	0	0
OTU_4463	15	1	0	64	69	27	0	2	0	12	5	5	1	1	1	34	109	126	0	0	5	76	7	58
OTU_5473	327	0	0	1	0	1	42	0	0	0	0	5	186	0	0	0	0	0	7	0	1	0	0	2
OTU_4	177	12	39	62	259	230	5	42	77	24	77	138	0	0	16	97	343	1081	0	0	59	12	834	2162
OTU_575	17	0	0	0	0	0	0	0	0	0	0	0	0	0	0	0	0	0	4	0	0	0	0	0
OTU_4236	2	0	0	0	0	0	1	0	1	0	0	0	1	0	0	0	0	0	0	0	0	0	0	0
OTU_49	150	196	203	683	173	16	60	6	910	49	28	55	0	64	100	27	97	49	3	911	644	0	65	89
OTU_5796	94	33	35	170	17	4	19	3	95	5	6	4	0	8	10	1	16	9	4	224	92	0	20	5
OTU_2789	5	0	0	0	0	0	0	0	0	0	0	0	0	0	0	0	0	0	0	0	0	0	0	0
OTU_1098	1	0	0	0	0	0	4	0	0	0	0	0	6	0	0	0	0	0	0	0	0	0	0	2
OTU_6566	49	2	0	0	0	0	23	0	0	0	0	0	50	0	0	0	0	1	3	0	0	0	0	1
OTU_5198	5	0	3	9	37	9	3	12	11	0	0	11	26	7	0	3	35	33	88	39	0	0	43	10
OTU_32	46	7	10	34	65	9	0	22	78	9	3	10	1	15	2	32	176	5	32	508	15	1	74	15
OTU_3072	6	0	0	0	0	0	0	0	0	0	0	0	0	0	0	0	0	0	0	0	0	0	0	0
OTU_135	197	0	3	0	1	5	24	3	6	0	0	1	71	17	0	3	0	0	8	0	0	0	3	23
OTU_1210	22	0	1	0	1	1	2	0	0	0	0	0	0	0	0	0	0	0	0	0	0	0	0	0
OTU_1593	4	0	0	0	0	0	0	0	0	0	0	0	2	0	0	0	0	0	0	0	0	0	0	0
OTU_3021	2	0	5	0	1	0	0	0	0	0	0	0	0	0	0	0	0	0	0	0	0	0	0	0
OTU_1257	38	0	0	0	0	0	12	0	1	0	0	0	0	1	0	0	0	0	18	5	0	0	0	0
OTU_98	12	0	3	83	232	24	1	0	3	19	29	26	0	0	3	22	39	16	0	0	60	0	1	9
OTU_36	10	5	2	68	13	8	3	14	8	23	19	35	2	0	0	31	0	17	7	12	0	101	10	7
OTU_3412	16	2	1	0	0	0	0	1	0	0	0	2	5	6	1	0	0	1	0	0	0	0	2	31
OTU_13	19	1	2	7	15	41	41	0	3	0	0	1	874	1	9	41	6	10	842	24	9	0	14	20
OTU_89	33	4	3	26	20	23	1	0	4	0	3	3	3	0	11	84	18	108	0	0	13	0	3	20
OTU_298	148	0	1	0	1	0	23	0	0	0	0	0	30	0	0	0	0	0	0	4	0	0	0	4
OTU_374	15	5	0	0	0	0	1	0	0	0	0	0	0	0	0	0	0	0	7	0	0	0	0	0
OTU_291	13	0	0	0	0	0	0	2	0	0	0	0	5	1	0	0	0	1	3	0	0	0	9	68
OTU_71	10	0	0	11	15	3	0	5	17	147	3	3	0	0	7	2	3	2	6	22	181	0	22	22
OTU_347	39	0	0	0	0	0	0	0	0	0	0	0	3	0	0	0	0	0	2	0	0	0	0	2
OTU_857	5	3	24	25	3	0	0	0	104	0	3	3	0	2	3	1	4	1	0	33	30	0	1	0
OTU_109	46	14	16	1651	18	138	5	72	146	2614	390	647	0	7	2	32	34	16	10	708	890	3	218	116
OTU_206	24	1	5	0	1	2	7	1	1	0	0	1	6	3	0	1	0	0	8	0	0	0	0	0
OTU_19	132	2	4	2	5	13	0	0	2	0	0	0	0	13	66	93	61	107	21	113	232	0	173	111
OTU_4417	1	24	0	0	0	0	0	0	0	0	0	0	0	9	0	0	0	0	0	0	0	0	0	0
OTU_1071	14	0	0	0	0	0	0	0	1	0	0	0	1	0	0	0	0	0	0	0	0	0	0	3
OTU_82	18	3	0	0	1	9	0	2	3	0	0	0	72	0	1	0	0	2	6	2	0	0	12	91
OTU_615	20	0	0	0	0	0	0	0	0	0	0	0	0	0	0	0	0	0	0	0	0	0	0	0
OTU_467	81	0	0	0	0	0	8	0	0	0	0	0	0	0	0	0	0	0	0	0	0	0	0	0
OTU_3875	20	0	0	0	0	0	1	5	2	0	0	0	2	0	2	0	0	0	0	0	0	0	1	19
OTU_441	23	0	1	0	0	0	0	0	0	0	0	0	0	0	0	0	0	0	0	0	0	0	0	0
OTU_527	28	10	1	1	1	3	82	0	2	0	0	1	307	1	1	1	0	2	27	3	0	0	0	0
OTU_370	44	0	0	0	1	0	2	0	5	0	0	0	30	1	0	0	0	2	10	0	0	0	1	19
OTU_1661	9	1	0	0	0	0	0	0	1	0	0	0	3	1	0	0	0	1	0	0	0	0	0	4
OTU_6413	10	63	34	1	4	3	0	0	6	0	0	1	7	31	23	8	0	6	2	0	2	0	7	2
OTU_1077	30	0	1	0	0	0	0	7	0	0	1	0	1	0	0	0	0	0	2	0	0	0	0	2
OTU_5722	29	9	8	491	145	71	8	18	46	58	13	119	2	4	3	38	54	59	7	79	2	35	13	26
OTU_2058	16	0	0	0	0	0	2	0	0	0	0	0	1	4	0	0	0	1	2	0	0	0	0	0
OTU_6463	12	28	20	0	1	4	4	0	2	0	0	0	1	48	9	0	1	5	0	0	1	0	6	8
OTU_1492	12	0	0	0	0	0	0	0	0	0	0	0	0	0	1	0	0	0	5	0	0	0	0	0
OTU_5762	212	0	0	0	0	0	66	0	0	0	0	2	205	0	0	1	0	0	3	0	0	0	0	1
OTU_1262	7	57	10	5	1	1	0	1	0	0	0	0	2	30	11	2	0	0	0	1	1	0	0	3
OTU_420	32	0	1	0	1	0	23	0	0	0	0	0	7	0	0	0	0	0	1	0	0	0	0	2
OTU_1313	3	0	0	0	0	0	0	2	0	0	0	0	3	0	0	0	0	1	6	0	0	0	2	9
OTU_6	15	3	24	99	244	544	10	41	39	16	45	3638	18	9	34	152	88	304	51	12	80	558	42	245
OTU_237	10	0	0	1	0	0	1	0	8	0	0	0	0	0	0	0	0	3	48	2	0	0	0	3
OTU_4399	3	0	0	0	0	0	0	0	0	0	0	0	0	0	0	0	0	0	0	0	0	0	0	0
OTU_269	40	13	3	0	0	1	0	11	9	0	0	1	9	8	0	0	0	1	26	9	0	0	0	1
OTU_1545	3	0	0	0	0	0	0	0	0	0	0	0	0	0	0	0	0	0	0	0	0	0	0	0
OTU_3070	2	0	0	0	0	0	0	0	0	0	0	0	0	0	0	0	0	0	0	0	0	0	0	0
OTU_362	25	0	0	0	0	0	7	0	0	0	0	0	51	3	0	0	0	1	8	0	0	0	0	10
OTU_3217	3	0	0	0	0	2	0	0	0	0	0	0	0	0	0	0	0	0	0	0	0	0	0	0
OTU_4790	2	0	0	0	0	0	0	0	0	0	0	0	0	0	0	0	0	0	0	0	0	0	0	0
OTU_289	19	0	0	0	1	0	12	2	2	1	0	0	21	7	1	0	0	0	13	0	0	0	0	10
OTU_927	10	0	0	0	0	0	0	0	0	0	0	0	0	0	0	0	0	0	0	0	0	0	0	0
OTU_3399	2	0	0	0	0	0	0	0	0	0	0	0	0	0	0	0	0	0	0	0	0	0	0	0
OTU_6194	2	0	0	0	0	0	0	0	0	0	0	0	0	0	0	0	0	0	0	0	0	0	0	0
OTU_754	4	0	4	0	0	0	1	0	1	0	0	0	1	2	0	0	0	0	2	0	0	0	0	10
OTU_4705	7	10	1	0	0	0	0	0	7	0	0	0	0	6	7	0	0	0	0	1	0	0	0	0
OTU_631	22	46	60	0	1	1	1	0	6	0	0	0	2	26	64	0	1	1	0	0	0	0	0	11
OTU_951	23	1	0	0	1	1	0	0	0	0	0	0	1	9	0	1	0	0	0	0	0	0	2	13
OTU_5658	3	8	1	0	0	0	0	0	1	0	0	0	3	5	0	0	0	0	1	0	0	0	0	0
OTU_2886	6	0	0	0	0	0	0	0	0	0	0	0	0	0	0	0	0	0	0	0	0	0	0	1
OTU_30	62	35	14	1	4	1	2	430	11	4	4	6	0	7	1	0	2	0	51	457	1	1	2	0
OTU_825	23	0	5	0	1	1	2	1	2	0	0	0	7	5	0	1	0	6	3	1	0	0	0	1
OTU_3115	4	0	1	0	0	1	0	1	0	0	0	0	3	1	0	0	0	1	2	0	0	0	0	0
OTU_1047	4	0	0	0	0	0	0	0	0	0	0	0	0	0	0	0	0	0	0	0	0	0	0	0
OTU_1958	22	3	3	15	23	10	0	40	128	47	32	60	6	1	17	53	21	10	167	100	161	0	82	163
OTU_1436	14	0	0	0	0	0	0	0	0	0	0	0	3	0	0	0	0	0	0	0	0	0	6	0
OTU_27	36	13	3	2	7	73	0	3	8	1	93	91	0	4	0	0	5	1	2	551	12	51	31	10
OTU_93	5	710	611	22	19	169	0	5	15	1	0	1	2	524	450	40	23	89	0	7	15	0	1	4
OTU_11	2	6	1	4	329	27	1	1	0	0	37	7	0	0	8	117	755	108	0	2	5	0	83	40
OTU_1984	10	0	0	0	0	0	0	0	0	0	0	0	0	0	0	0	0	0	0	0	0	0	0	0
OTU_3278	23	0	0	0	0	1	5	0	0	0	0	0	1	1	0	0	0	0	0	0	0	0	0	0
OTU_284	46	5	0	0	0	0	17	0	0	0	0	0	91	2	0	0	0	0	4	0	0	0	0	1
OTU_1692	6	0	0	0	0	0	0	0	0	0	0	0	0	0	0	0	0	0	0	0	0	0	0	0
OTU_6624	21	0	1	0	0	2	6	1	0	0	0	0	12	2	0	1	0	0	2	0	0	0	0	2
OTU_37	26	5	0	0	15	6	1	119	102	5	10	24	0	4	29	7	25	5	59	870	16	1	169	12
OTU_924	7	7	0	0	0	0	0	0	0	0	0	0	0	4	2	0	0	0	1	0	0	0	0	1
OTU_5726	18	0	1	0	1	0	7	0	0	1	0	0	347	1	2	1	0	0	23	1	0	0	0	0
OTU_83	9	0	4	33	16	28	0	0	0	6	0	2	0	0	0	5	1	11	0	0	1	0	0	2
OTU_1668	10	0	0	0	1	1	0	0	0	0	0	0	0	0	1	0	0	0	0	0	0	0	0	0
OTU_937	6	0	1	0	0	0	1	0	2	0	0	0	0	0	0	0	0	0	0	0	0	0	0	1
OTU_10	22	4	37	1760	57	70	15	58	1207	5617	3512	540	0	59	16	234	164	27	34	2681	3450	3	1366	279
OTU_231	2	227	317	21	53	104	0	0	16	1	0	0	1	172	322	33	64	66	0	6	0	0	0	1
OTU_96	18	5	24	11	12	10	0	3	213	16	31	13	0	0	4	0	9	1	3	26	52	0	23	39
OTU_153	35	2	2	4	1	0	1	0	0	0	2	1	2	0	0	2	0	0	0	0	0	0	0	0
OTU_558	17	5	1	0	0	0	2	1	1	0	0	0	8	7	2	0	0	2	13	0	0	0	0	11
OTU_1209	10	0	3	5	6	19	0	2	19	0	0	0	1	7	0	2	0	2	8	40	3	12	12	4
OTU_440	12	0	0	0	0	0	0	0	0	0	0	2	1	15	0	0	0	0	0	0	0	0	0	0
OTU_205	75	11	1	0	14	0	6	0	3	0	0	0	64	4	0	0	0	1	0	0	0	0	0	40
OTU_2152	1	0	0	0	0	0	0	0	0	0	0	0	0	0	0	0	0	0	0	0	0	0	0	1
OTU_1297	5	0	0	0	0	0	0	0	6	0	0	0	0	0	0	0	0	0	0	0	0	0	0	3
OTU_2034	2	0	3	0	0	4	0	3	12	1	0	3	0	0	0	0	0	3	0	15	6	1	1	4
OTU_412	5	0	0	0	0	0	8	0	0	0	0	0	11	0	0	0	0	0	18	0	0	0	0	6
OTU_5416	46	0	0	0	1	0	7	0	0	0	0	0	35	0	0	0	0	0	0	0	0	0	0	0
OTU_16	12	26	15	327	156	2	15	8	12	0	1	1	10	0	0	3	22	13	52	8	15	1	9	6
OTU_1817	1	1	0	0	0	0	0	0	0	0	0	0	0	0	0	0	0	0	6	2	0	0	3	7
OTU_3265	3	0	0	0	1	0	0	0	0	0	0	1	0	0	0	0	0	0	1	0	0	0	0	1
OTU_1861	2	0	0	0	0	0	0	0	2	0	0	0	0	0	0	0	0	0	1	0	0	0	0	2
OTU_856	22	2	12	32	15	56	2	39	29	162	176	274	0	2	1	0	14	6	7	50	87	1	26	27
OTU_1752	6	0	0	0	0	0	0	0	0	0	0	0	0	0	0	0	0	0	0	0	0	0	0	0
OTU_3391	7	0	0	0	0	0	0	0	0	0	0	0	0	0	0	0	0	0	0	0	0	0	0	1
OTU_164	6	1	0	1	0	1	32	9	4	0	0	0	55	3	0	2	1	0	56	0	1	0	2	32
OTU_6470	7	0	0	0	0	0	3	1	0	0	1	0	18	3	0	0	0	0	1	0	0	0	0	1
OTU_2239	11	2	3	0	1	92	0	1	15	4	8	53	0	3	0	0	0	4	3	45	9	91	0	0
OTU_1124	1	1	0	8	1	1	0	4	1	85	18	3	0	0	0	0	0	0	2	11	10	0	6	1
OTU_1965	4	0	0	0	0	0	0	0	0	0	0	0	0	0	0	0	0	0	0	0	0	0	0	0
OTU_240	2	0	0	0	0	0	2	0	0	0	0	0	4	0	0	1	0	0	39	0	0	0	0	0
OTU_4975	6	4	3	0	0	0	1	1	1	0	0	0	0	2	0	0	0	0	0	0	0	0	0	0
OTU_1602	11	0	0	0	0	1	0	0	0	0	0	0	0	0	0	0	0	0	0	0	0	0	0	0
OTU_3880	12	8	12	40	9	1	2	3	46	2	1	2	0	0	4	6	10	6	1	40	35	0	5	5
OTU_1615	13	2	0	0	0	0	0	0	1	0	0	0	0	0	3	0	0	0	0	0	0	0	0	0
OTU_1830	9	0	0	0	0	0	0	0	0	0	0	0	2	1	0	0	0	0	0	0	0	0	0	17
OTU_1085	17	2	0	0	0	0	0	0	2	0	0	0	0	1	0	0	0	0	0	0	0	0	0	1
OTU_935	11	27	1	0	0	0	0	0	0	0	0	0	1	3	0	0	0	0	0	5	0	0	0	0
OTU_3515	1	2	2	0	0	0	0	0	0	0	0	0	0	0	0	0	0	0	0	0	0	0	0	0
OTU_2705	2	0	2	3	0	0	0	1	0	1	0	0	1	0	0	0	0	0	4	7	0	4	1	2
OTU_1995	7	0	0	0	0	2	0	0	0	0	0	0	8	0	0	0	0	1	0	0	0	0	2	33
OTU_565	13	29	0	0	0	1	0	2	3	0	0	0	6	21	0	0	0	3	11	7	0	0	0	0
OTU_767	6	0	0	1	0	0	0	0	0	0	0	1	0	0	0	0	0	0	0	0	0	0	0	0
OTU_1102	1	0	0	0	0	0	0	0	0	0	0	0	5	0	0	0	0	0	3	0	0	0	0	0
OTU_2898	9	0	1	0	1	0	0	1	0	0	0	0	1	4	0	0	0	0	44	29	2	0	0	15
OTU_1050	5	0	0	0	0	0	0	0	0	0	0	0	0	0	0	0	0	0	0	0	0	0	0	0
OTU_1980	6	0	0	0	0	0	0	0	0	0	0	0	0	0	0	0	0	0	0	0	0	0	0	0
OTU_1919	7	0	0	0	0	1	1	0	0	0	0	0	0	0	0	0	0	0	0	0	0	0	0	0
OTU_2463	1	0	0	0	0	0	0	0	0	0	0	0	1	0	0	0	0	0	0	0	0	0	0	0
OTU_91	1	0	2	0	3	0	0	1	2	0	0	0	0	4	0	1	0	0	0	83	1	0	8	0
OTU_5723	27	0	0	0	0	0	2	0	0	0	0	1	39	0	0	0	0	0	2	0	0	0	0	0
OTU_1850	3	0	0	0	0	0	0	0	0	0	0	0	0	0	0	0	0	0	0	0	0	0	0	0
OTU_384	2	0	4	4	13	0	0	0	7	0	0	1	0	0	0	2	9	0	21	12	4	1	5	0
OTU_6603	1	0	0	0	0	4	0	0	0	0	0	3	0	0	0	0	0	0	0	1	0	0	0	1
OTU_1195	16	0	0	0	0	0	1	1	0	0	0	0	0	0	0	0	0	0	8	0	0	0	9	2
OTU_4407	17	0	0	0	0	0	2	1	0	0	0	0	2	2	0	0	0	0	3	0	0	0	0	3
OTU_251	36	0	0	0	0	0	7	0	1	0	0	0	2	0	0	0	0	0	7	0	0	0	0	0
OTU_6250	1	0	0	0	0	0	0	0	0	0	0	0	0	0	0	0	0	0	18	0	0	0	2	0
OTU_1778	13	1	0	1	5	0	56	40	9	0	0	0	163	1	0	0	0	0	21	0	0	0	24	86
OTU_78	4	0	10	1	53	11	1	2	28	0	12	2	1	6	51	4	23	7	4	78	35	7	35	3
OTU_1086	6	0	0	0	0	0	0	0	0	0	0	0	0	0	0	0	0	0	0	0	0	0	0	0
OTU_2287	1	34	0	0	0	0	1	0	0	0	0	0	1	17	0	0	0	0	0	0	0	0	0	1
OTU_743	14	0	0	0	0	0	4	0	0	0	0	0	8	1	0	0	0	0	0	0	0	0	0	0
OTU_1663	4	0	0	0	0	0	0	1	0	0	0	0	0	0	0	0	0	0	0	0	0	0	0	0
OTU_5200	6	0	0	0	0	0	0	0	0	0	0	0	0	0	0	1	0	0	1	0	0	0	0	0
OTU_4514	9	0	2	0	0	3	1	7	8	0	0	0	0	2	0	0	0	0	0	0	1	0	0	0
OTU_1840	11	0	0	0	0	0	0	0	0	0	0	0	0	0	0	0	0	0	2	0	0	0	0	0
OTU_981	11	0	1	0	0	0	4	0	0	0	0	0	0	0	1	0	0	0	0	0	0	0	0	0
OTU_59	5	0	0	391	7	17	0	1	0	7	19	14	0	0	1	30	4	1	0	5	10	0	2	5
OTU_233	8	7	7	2	11	16	14	17	4	1	0	0	10	14	5	38	18	8	41	2	13	0	7	3
OTU_5437	1	0	0	0	0	0	0	0	0	0	0	0	0	0	0	0	0	0	0	0	0	0	0	0
OTU_5394	1	0	0	0	0	0	0	0	0	0	0	0	1	0	0	0	0	0	0	0	0	0	0	3
OTU_6636	1	0	0	0	0	1	23	0	0	0	0	0	202	0	0	0	0	1	9	0	0	0	1	1
OTU_114	8	7	0	15	13	5	57	23	0	0	0	0	1	9	1	32	80	0	0	61	212	0	0	0
OTU_4558	1	0	0	33	4	0	0	0	0	2	1	0	0	0	0	0	0	0	0	0	0	0	0	0
OTU_3752	5	0	0	0	1	7	7	0	0	0	0	0	39	3	0	0	0	0	11	0	0	0	0	3
OTU_2368	1	0	0	0	0	0	0	0	0	0	0	0	0	0	0	0	0	0	0	0	0	0	0	0
OTU_151	1	0	3	1	6	5	0	4	6	4	38	36	0	0	4	4	9	20	0	9	40	49	48	90
OTU_843	12	0	4	0	0	2	4	0	3	0	0	0	6	2	1	1	0	0	10	4	0	0	0	0
OTU_1385	4	0	0	0	0	0	0	1	0	0	0	0	1	0	0	0	0	0	0	0	0	0	0	0
OTU_1656	15	1	2	0	1	2	3	0	0	0	0	0	7	0	2	1	0	0	7	0	0	0	0	0
OTU_142	1	40	31	26	38	10	0	0	0	0	0	0	0	26	44	73	65	13	0	0	0	0	1	1
OTU_1812	6	0	3	9	1	13	0	1	0	164	12	23	0	0	6	0	0	4	0	15	2	21	2	9
OTU_1845	8	2	0	0	0	0	0	1	0	0	0	0	0	0	0	0	0	0	0	0	0	0	0	0
OTU_1263	9	0	0	0	0	0	7	0	0	0	0	0	7	0	0	0	0	0	0	0	0	0	0	0
OTU_5570	3	0	0	0	0	0	0	0	0	0	0	0	0	0	0	0	0	0	0	0	0	0	0	0
OTU_5209	1	1	0	14	0	5	0	5	3	4	0	9	0	0	0	0	1	0	2	9	0	0	0	0
OTU_2821	10	5	0	1	3	6	54	3	5	1	1	0	244	1	0	5	4	4	225	0	1	0	0	6
OTU_1670	4	0	0	0	0	0	0	1	1	0	0	0	0	0	0	0	0	0	2	0	0	0	0	0
OTU_758	2	0	0	1	14	4	0	0	0	0	0	0	0	0	0	12	21	2	0	0	0	0	0	0
OTU_970	14	4	10	0	0	1	2	3	5	0	0	0	3	5	3	0	2	0	8	1	3	0	0	2
OTU_3010	4	0	2	61	1	3	0	3	24	11	1	0	0	1	0	2	2	1	4	14	5	0	18	6
OTU_3203	2	0	2	11	20	10	0	0	20	0	7	12	0	18	6	108	36	12	0	7	0	0	0	2
OTU_5911	3	4	5	0	2	1	0	0	0	0	0	0	0	15	2	0	1	0	0	1	0	0	0	0
OTU_2651	11	0	1	0	0	0	0	0	0	0	0	1	0	0	0	0	0	0	0	0	0	0	0	0
OTU_73	14	0	5	0	1	0	66	0	1	0	0	0	353	4	2	0	1	8	15	0	0	0	3	11
OTU_619	11	11	1	0	0	1	0	0	0	0	0	0	17	3	0	0	0	0	0	0	0	0	0	2
OTU_50	2	18	128	22	90	212	0	0	44	20	23	8	0	8	113	26	50	112	0	7	31	0	56	65
OTU_659	13	0	0	0	0	0	2	0	1	0	0	0	1	0	0	0	0	0	0	0	0	0	0	0
OTU_1659	7	0	0	0	0	0	0	1	0	0	0	0	0	0	0	0	0	0	0	0	0	0	0	0
OTU_395	4	66	21	0	0	2	1	0	5	0	0	0	2	16	22	0	0	0	8	5	8	0	0	11
OTU_2082	5	0	0	0	0	0	0	0	0	0	0	0	0	0	0	0	0	0	0	0	0	0	0	0
OTU_3599	26	0	0	0	0	0	0	0	3	0	0	0	2	1	0	0	0	0	0	2	0	0	0	9
OTU_189	34	0	0	0	0	0	1	0	0	0	0	0	1	0	0	0	0	0	24	0	0	0	0	0
OTU_2372	8	0	0	0	0	0	0	0	1	0	0	0	0	0	0	0	0	0	1	0	0	0	0	2
OTU_4074	4	1	0	5	2	2	0	0	1	2	2	1	0	0	0	0	1	1	2	1	5	0	3	5
OTU_6640	2	0	1	0	0	0	11	0	0	0	0	0	209	0	0	0	0	0	3	1	0	0	0	0
OTU_3496	21	0	1	0	0	1	0	0	0	0	0	0	0	0	0	0	0	0	0	0	0	0	0	0
OTU_1555	5	0	0	0	0	0	0	3	0	0	0	0	4	7	0	0	0	0	0	0	0	0	0	10
OTU_1651	9	0	0	0	0	0	0	2	2	0	0	0	0	0	0	0	0	0	0	0	0	0	1	9
OTU_1549	2	0	0	0	0	1	0	0	2	0	0	0	0	0	0	0	0	0	0	0	0	0	0	0
OTU_5439	5	0	1	1	5	3	0	0	0	0	0	2	0	1	0	1	0	1	3	0	0	0	0	0
OTU_6627	7	0	0	0	0	0	2	0	0	0	0	0	9	0	0	0	0	0	0	0	0	0	0	0
OTU_334	1	0	0	0	0	1	0	0	3	3	0	0	0	0	0	0	0	0	4	1	8	0	2	2
OTU_2020	3	1	0	4	0	0	0	1	3	2	0	0	0	1	0	0	0	0	0	4	1	45	0	3
OTU_2995	3	2	13	0	1	9	2	0	0	0	0	0	4	1	7	3	4	0	2	0	0	0	0	0
OTU_4209	9	0	1	0	0	0	3	0	0	0	2	0	87	5	0	0	1	1	2	0	0	0	0	4
OTU_72	1	0	0	0	3	0	0	4	3	0	0	1	3	0	0	0	0	0	194	1	0	1	0	0
OTU_623	3	0	0	0	0	0	0	0	0	0	0	0	0	0	0	0	0	0	7	0	0	0	0	1
OTU_554	10	0	0	0	1	0	0	0	0	0	0	0	2	0	0	0	0	0	0	0	0	0	0	0
OTU_1155	1	59	46	16	12	2	0	0	0	0	0	0	0	37	61	31	3	1	0	3	3	0	0	0
OTU_748	20	0	0	0	0	0	1	0	0	0	0	0	13	0	0	0	0	0	11	1	0	0	0	0
OTU_42	5	2	5	259	12	3	0	5	31	86	13	3	2	12	0	4	33	2	58	132	14	7	12	0
OTU_776	10	0	0	0	0	1	0	0	0	0	0	0	0	0	0	0	0	0	0	0	0	0	0	0
OTU_3106	10	0	4	0	1	0	0	0	0	0	0	0	0	0	6	0	0	0	0	1	0	0	0	15
OTU_3982	3	0	0	0	0	0	0	0	0	0	0	0	0	0	0	0	0	0	0	1	0	0	0	1
OTU_722	9	0	0	0	0	0	7	0	7	0	0	1	10	0	0	0	0	0	0	0	0	0	0	0
OTU_4005	2	0	0	2	3	3	0	0	0	0	0	0	0	0	0	3	1	1	0	5	2	13	0	0
OTU_5790	1	0	0	0	0	0	0	0	0	0	0	0	0	0	0	0	0	0	0	0	0	0	0	0
OTU_168	7	3	0	5	96	76	1	0	0	0	3	42	0	0	4	4	6	2	1	0	8	0	1	1
OTU_35	4	6	4	10	30	15	0	12	14	193	9	29	0	4	6	30	20	25	25	52	216	0	35	64
OTU_954	2	0	0	0	0	0	0	0	1	0	0	0	0	0	0	0	0	0	0	0	0	0	0	15
OTU_1921	4	1	1	0	0	0	0	0	0	0	0	0	1	0	0	0	0	0	0	0	0	0	0	0
OTU_228	26	0	1	0	0	1	0	0	8	0	0	0	8	0	0	0	0	1	2	0	0	0	0	42
OTU_101	12	0	0	0	0	1	0	1	2	0	0	0	15	1	0	0	0	0	52	5	0	0	1	42
OTU_4311	2	0	0	0	0	1	0	0	0	0	0	0	0	0	0	0	0	0	0	0	0	0	0	0
OTU_5261	10	0	2	0	0	2	0	2	0	0	0	0	15	2	0	0	0	0	2	0	0	0	0	10
OTU_6027	10	0	0	0	0	0	0	0	0	0	0	0	4	0	0	0	0	0	0	0	0	0	0	0
OTU_4440	2	0	0	0	0	0	1	0	0	0	0	0	5	0	0	0	0	0	0	0	0	0	0	0
OTU_761	2	46	0	0	1	5	0	0	0	0	0	0	3	19	0	0	1	0	1	0	0	0	2	0
OTU_1751	29	0	2	0	0	0	0	0	0	0	0	0	1	0	2	0	0	0	0	0	0	0	0	2
OTU_1020	1	0	1	1	1	0	0	0	3	0	0	0	0	0	2	0	0	0	14	5	0	1	0	0
OTU_478	3	2	1	1	7	5	0	5	26	0	0	0	0	0	1	0	0	1	2	0	0	0	0	0
OTU_2011	6	48	37	317	127	44	21	44	83	43	19	36	10	5	8	12	22	10	76	141	15	3	12	4
OTU_2543	6	1	0	0	0	0	0	0	0	0	0	0	0	0	0	0	0	0	0	0	0	0	2	1
OTU_48	5	2	0	25	86	40	1	1	35	3	37	33	2	0	11	19	76	33	8	9	16	107	41	46
OTU_2456	2	23	3	1	1	0	0	6	6	0	0	0	0	3	4	0	0	0	0	11	1	0	0	0
OTU_2567	4	0	0	0	0	0	0	0	0	0	0	0	0	0	0	0	0	0	0	0	0	0	0	0
OTU_4981	1	0	0	0	0	0	0	0	0	0	0	0	0	0	0	0	0	0	0	0	0	0	0	0
OTU_546	3	0	0	2	1	3	0	5	9	2	7	11	0	0	1	3	1	0	18	4	22	0	5	12
OTU_2652	9	0	0	0	0	1	0	3	0	0	0	0	1	1	0	0	0	0	0	0	0	0	0	1
OTU_1547	1	1	6	0	0	1	0	0	0	0	0	0	0	1	0	0	0	0	0	0	0	0	1	0
OTU_247	1	0	0	0	0	2	0	5	5	0	0	6	0	0	0	0	0	0	3	0	0	0	1	0
OTU_33	1	111	389	104	227	353	0	0	4	2	0	0	1	45	498	203	162	491	0	3	13	0	8	9
OTU_5564	7	1	1	0	0	2	0	0	0	0	0	0	0	0	3	6	2	5	0	4	17	0	2	9
OTU_770	8	0	2	0	1	1	0	1	5	0	0	0	0	6	1	0	0	0	0	14	0	0	0	0
OTU_6004	2	0	0	0	0	0	0	0	0	0	0	0	0	0	0	0	0	0	0	0	0	0	0	0
OTU_40	6	1	1	87	10	4	1	3	13	0	1	5	0	4	11	365	152	36	0	36	39	5	22	21
OTU_1884	8	0	0	0	2	0	0	0	0	0	0	0	3	0	0	0	0	0	5	0	0	0	0	3
OTU_66	3	5	4	67	112	36	2	9	13	4	9	39	20	0	31	42	52	73	43	13	106	43	0	7
OTU_5138	1	0	0	0	0	0	0	0	0	0	0	0	0	0	0	0	0	0	0	0	0	0	0	0
OTU_2699	1	0	0	0	0	0	0	2	2	0	0	0	0	0	0	0	0	0	0	0	0	0	0	0
OTU_6535	13	10	6	0	1	2	1	0	0	0	1	1	12	21	1	0	0	1	1	0	0	0	2	1
OTU_339	1	1	0	0	0	0	9	2	0	0	0	0	14	0	0	0	0	0	14	0	0	0	0	0
OTU_4159	8	147	35	10	30	23	1	0	39	0	3	1	2	57	60	17	14	32	0	16	40	0	4	21
OTU_44	17	7	1	120	315	7	3	2	0	32	176	5	0	0	0	1	17	29	0	0	0	0	13	16
OTU_675	2	42	12	0	0	0	0	0	7	0	0	0	0	42	17	4	0	0	0	0	0	0	0	0
OTU_640	1	0	0	0	3	0	0	1	3	10	3	0	0	0	0	2	0	0	3	10	10	0	5	0
OTU_4809	1	0	0	0	0	0	0	0	0	0	0	0	1	0	0	0	0	0	0	0	0	0	0	0
OTU_3390	5	22	0	1	4	2	0	0	0	0	0	0	0	3	6	2	1	0	0	0	0	0	0	0
OTU_5705	1	0	0	0	0	0	0	0	0	0	0	0	0	0	0	0	0	0	0	0	0	0	0	0
OTU_521	3	0	2	1	0	1	18	2	0	0	0	0	27	0	0	0	1	1	48	1	1	0	6	12
OTU_5281	1	0	0	0	2	0	0	0	0	4	3	0	0	0	0	0	0	0	1	0	3	1	3	1
OTU_1315	3	0	0	0	0	0	0	0	3	0	0	0	2	0	0	0	3	1	11	0	0	0	0	6
OTU_475	25	0	0	2	0	0	0	0	0	0	0	0	0	0	0	0	0	0	0	0	0	0	0	0
OTU_501	2	0	0	82	0	0	0	1	0	13	6	2	0	0	0	0	1	0	0	0	12	2	1	2
OTU_5842	1	0	0	0	0	0	0	0	0	0	0	0	0	0	0	0	0	0	0	0	0	0	0	0
OTU_2860	1	0	0	0	0	0	2	0	0	0	0	0	2	0	0	0	0	0	0	0	0	0	0	0
OTU_4732	3	1	0	0	0	0	3	0	1	0	0	0	27	0	1	1	0	0	2	0	0	0	0	0
OTU_6188	5	0	0	0	0	0	3	0	0	0	0	0	5	0	0	0	0	0	0	0	0	0	0	0
OTU_626	3	0	0	0	0	0	0	0	0	0	0	0	4	0	0	0	0	1	6	1	0	0	1	12
OTU_2097	1	0	0	7	3	0	0	0	1	0	0	0	0	0	0	0	18	0	0	1	1	1	18	0
OTU_1465	6	0	0	0	0	7	0	0	2	0	0	0	0	0	0	0	0	0	0	0	0	0	0	0
OTU_1180	6	7	2	0	0	0	0	0	0	0	0	1	0	3	0	0	0	0	0	7	0	0	0	0
OTU_4928	3	1	0	4	6	4	0	5	2	2	0	7	1	0	1	5	3	2	4	5	0	1	0	0
OTU_132	3	2	0	0	0	0	7	1	3	0	0	0	86	0	0	0	1	1	137	3	0	0	3	4
OTU_5963	14	0	0	0	0	0	0	0	0	0	0	0	1	0	0	0	0	0	0	0	0	0	0	3
OTU_3105	6	0	0	0	0	0	0	0	0	0	0	0	0	0	0	0	0	0	0	0	0	0	0	0
OTU_5568	8	2	3	2	0	0	1	0	0	0	0	0	3	3	0	1	0	0	4	1	0	0	0	0
OTU_4992	2	1	0	0	0	0	0	0	0	0	0	0	0	2	0	0	0	0	0	0	0	0	0	0
OTU_1633	8	0	0	0	0	0	0	0	0	0	0	0	0	0	0	0	0	0	0	0	0	0	0	16
OTU_113	1	6	0	2	0	0	2	4	1	0	0	0	9	0	0	0	0	0	63	0	3	0	0	0
OTU_6238	7	0	0	0	0	0	0	0	0	0	0	0	0	1	0	0	0	0	0	0	0	0	0	2
OTU_81	1	2	0	12	18	6	0	1	4	0	4	4	1	0	2	9	3	13	0	0	5	0	0	32
OTU_919	1	0	0	0	0	0	0	0	0	0	0	0	2	0	0	0	0	0	3	3	0	0	0	2
OTU_2673	5	0	1	0	0	0	0	0	1	0	0	0	5	0	0	0	0	0	0	0	0	0	0	5
OTU_533	11	1	1	0	2	3	29	0	0	0	0	0	45	1	0	0	0	0	24	1	0	0	0	5
OTU_6174	12	0	0	0	0	0	1	0	0	0	0	0	4	0	0	0	0	0	0	0	0	0	0	0
OTU_2306	5	0	0	0	0	0	0	0	0	0	0	0	2	0	0	0	0	0	0	0	0	0	0	0
OTU_5593	2	0	2	22	19	4	0	0	8	3	3	2	1	4	1	3	207	2	17	19	1	59	89	5
OTU_2566	1	0	0	0	0	0	0	0	0	0	0	0	0	0	0	0	0	0	0	0	0	0	0	0
OTU_108	4	84	36	3	3	5	9	3	23	0	0	2	4	27	38	18	7	1	2	3	0	0	3	31
OTU_3491	2	0	0	0	0	0	0	0	0	0	0	0	0	0	0	0	0	0	0	0	0	0	0	0
OTU_1599	2	0	0	0	0	0	0	0	0	0	0	0	0	0	0	0	0	0	6	0	0	0	1	0
OTU_629	8	0	2	0	0	0	1	0	0	0	0	0	0	0	0	0	0	0	1	0	0	0	0	0
OTU_5792	2	0	0	0	0	0	0	0	0	0	0	0	2	1	0	0	0	0	0	0	0	0	0	0
OTU_85	1	0	0	3	1	0	0	1	1	3	1	1	0	0	0	2	4	0	4	16	2	183	0	1
OTU_2608	2	2	0	0	0	0	0	0	0	0	0	0	0	0	0	0	0	0	0	0	0	0	0	3
OTU_5791	3	0	0	0	0	0	3	0	0	0	0	0	1	0	0	0	0	0	0	0	0	0	0	0
OTU_4905	2	1	0	0	0	0	0	0	0	0	0	0	0	2	0	0	0	0	0	0	0	0	0	0
OTU_1987	4	4	0	0	0	0	0	1	0	0	0	0	0	3	2	1	0	0	0	0	0	0	0	1
OTU_2139	2	1	0	0	8	1	0	2	0	0	3	0	0	0	8	14	43	6	0	6	21	12	5	1
OTU_3178	1	0	0	0	0	0	2	0	0	0	0	0	0	1	0	0	0	0	0	0	0	0	0	0
OTU_3064	1	0	1	0	0	0	0	0	0	0	0	0	0	0	1	0	0	0	0	0	0	0	0	0
OTU_5139	1	0	0	0	0	0	0	0	0	0	0	0	0	0	0	0	0	0	0	0	0	0	0	0
OTU_223	2	1	0	0	1	0	0	0	55	0	0	0	0	0	0	0	0	0	0	15	3	0	0	0
OTU_2675	2	0	0	0	0	0	1	0	0	0	0	0	2	0	0	0	0	0	3	0	0	0	0	3
OTU_1266	4	0	0	0	0	1	0	1	0	0	0	0	1	0	0	0	0	0	4	0	0	0	0	0
OTU_1963	3	11	2	2	0	2	1	1	0	0	0	0	7	1	6	0	1	0	0	0	0	0	0	0
OTU_6113	1	1	0	0	0	1	0	3	2	0	0	0	1	1	0	0	0	0	4	0	0	0	0	0
OTU_23	1	9	1	86	110	68	1	8	0	7	0	0	0	0	48	55	49	11	33	0	1	0	0	0
OTU_899	6	0	0	0	0	0	2	1	1	2	0	0	8	0	0	0	0	0	3	0	0	0	0	0
OTU_2255	4	0	2	0	0	0	0	0	0	0	0	0	0	1	0	0	0	0	0	0	0	0	0	0
OTU_4733	9	0	0	0	0	0	6	0	0	0	0	0	14	0	0	0	0	0	1	0	0	0	0	0
OTU_2571	5	0	0	0	51	0	0	0	0	0	5	1	0	0	0	0	0	0	3	0	7	0	0	6
OTU_208	2	5	0	0	0	0	0	28	7	1	0	0	0	0	0	0	0	0	88	0	0	0	0	0
OTU_6578	2	0	0	23	0	8	0	1	1	10	0	1	0	0	0	0	1	0	1	0	0	0	1	0
OTU_936	5	0	3	0	0	0	0	6	5	0	0	0	0	8	5	0	0	0	0	20	0	0	0	3
OTU_3618	5	0	0	0	0	0	0	0	0	0	0	0	2	2	0	0	0	1	0	0	0	0	0	1
OTU_1697	2	2	0	7	23	39	1	0	1	3	4	6	0	3	2	21	42	107	2	1	1	2	8	27
OTU_2961	4	4	0	0	0	0	7	0	0	0	0	0	19	0	1	1	1	0	28	0	0	0	2	7
OTU_2369	1	0	0	0	0	0	0	0	0	0	0	0	0	0	0	0	0	0	1	0	0	0	2	1
OTU_1222	4	0	0	1	0	0	0	1	2	0	0	0	2	0	0	0	0	0	0	0	0	0	0	3
OTU_3537	5	0	0	0	0	0	2	0	0	0	0	0	7	0	0	0	0	0	0	0	0	0	0	0
OTU_1120	9	0	0	0	1	2	0	0	2	0	0	0	3	1	0	0	0	0	63	6	0	0	0	20
OTU_4619	3	0	0	0	0	0	0	0	0	0	0	0	0	0	0	0	0	0	0	0	0	0	0	0
OTU_2842	1	3	0	0	0	0	0	0	0	0	0	0	0	1	0	0	0	0	0	0	0	0	0	0
OTU_2151	1	0	0	0	0	0	0	0	0	0	0	0	0	0	0	0	0	0	0	0	0	0	0	4
OTU_3727	1	0	0	0	0	0	0	0	0	0	0	0	1	0	0	0	0	0	0	0	0	0	0	0
OTU_1655	3	0	0	0	0	0	0	0	0	0	0	0	5	0	0	0	0	0	0	0	0	0	0	0
OTU_45	1	2	0	3	0	6	0	211	3	1	4	68	0	0	0	3	4	8	0	0	0	238	6	18
OTU_6516	4	0	0	23	18	26	4	2	3	0	1	27	5	0	1	5	1	5	12	1	3	5	1	1
OTU_1872	1	0	0	0	0	0	0	0	0	0	0	0	0	0	0	0	0	0	0	0	0	0	0	3
OTU_3451	3	0	0	0	0	0	0	0	0	0	0	0	0	0	0	0	0	0	8	1	0	0	0	1
OTU_2837	4	0	0	0	0	0	0	0	0	0	0	0	0	0	0	0	0	0	0	0	0	0	0	0
OTU_5438	5	0	0	1	0	0	0	0	0	0	0	0	0	0	0	0	0	0	0	0	0	0	0	0
OTU_6200	1	10	1	0	0	1	2	0	1	0	0	0	23	9	3	2	1	1	0	0	1	0	1	3
OTU_1421	1	2	0	9	1	0	0	0	0	0	0	0	0	0	0	0	0	2	0	0	0	0	0	0
OTU_1224	1	0	0	0	0	1	0	0	0	0	0	0	0	1	0	0	0	0	0	0	8	0	0	0
OTU_1049	9	0	0	0	0	0	2	0	2	0	0	0	0	0	0	0	0	0	1	0	0	0	0	0
OTU_179	2	0	0	0	14	7	1	0	0	0	5	34	0	0	6	31	10	10	0	0	5	0	0	0
OTU_922	3	0	0	0	0	0	1	0	0	0	0	0	3	0	0	0	0	0	5	0	3	0	0	0
OTU_700	2	0	0	0	2	1	0	0	0	12	0	1	0	0	0	0	1	0	1	3	13	0	16	0
OTU_87	6	10	0	0	0	1	52	2	6	0	0	0	214	13	0	0	3	0	28	0	0	0	2	35
OTU_742	2	23	0	0	0	0	0	0	1	0	0	0	7	9	0	0	0	0	0	4	0	0	0	0
OTU_6644	2	0	0	0	0	0	0	0	0	0	0	0	2	0	0	0	0	0	0	0	0	0	0	0
OTU_3981	2	0	0	0	0	0	0	0	0	0	0	0	0	0	0	0	0	0	0	0	0	0	0	0
OTU_2177	1	0	0	1	3	0	0	3	8	3	2	7	0	0	1	0	1	0	8	1	11	0	3	6
OTU_5795	1	0	0	5	1	1	0	0	2	0	1	1	0	0	0	0	11	0	5	0	0	6	6	0
OTU_2648	1	0	0	0	0	0	0	0	0	0	0	0	0	0	0	0	0	0	0	0	0	0	0	0
OTU_3101	1	0	0	0	0	0	0	0	0	0	0	0	0	0	0	0	0	0	0	0	0	0	0	0
OTU_1284	11	3	0	0	0	0	3	0	2	0	0	0	12	0	0	1	0	0	0	0	0	0	0	3
OTU_3076	1	0	1	0	0	0	0	0	1	0	0	1	0	0	0	0	0	0	0	0	0	0	0	0
OTU_3266	1	0	0	0	0	0	0	0	0	0	0	0	0	0	0	0	0	0	0	0	0	0	0	0
OTU_4193	6	0	0	0	0	0	0	0	0	0	0	0	0	0	0	0	0	0	0	0	0	0	0	0
OTU_1312	3	0	0	0	0	0	0	0	3	0	0	0	0	0	0	0	0	0	0	0	1	0	0	0
OTU_2933	2	0	1	0	3	0	0	1	3	1	0	0	0	1	0	1	1	0	10	2	5	0	4	6
OTU_5045	1	36	1	0	0	0	0	0	0	0	0	0	0	23	0	0	0	0	0	1	0	0	0	0
OTU_2540	3	0	0	0	0	1	0	0	0	0	0	0	1	0	0	0	0	0	3	0	0	0	2	2
OTU_4387	2	0	0	0	0	0	0	0	0	0	0	0	0	0	0	4	2	0	0	1	0	0	0	0
OTU_3760	1	0	0	0	0	0	0	0	0	0	0	0	1	0	0	0	0	0	0	0	0	0	0	0
OTU_100	2	0	0	0	0	0	10	1	0	0	0	0	0	0	0	0	0	0	215	0	2	0	0	1
OTU_5776	1	3	0	38	8	0	1	0	0	0	0	0	0	0	0	0	0	1	0	0	0	0	0	5
OTU_3058	2	0	0	1	3	0	0	1	2	1	7	9	0	0	19	6	9	6	0	13	10	1	76	5
OTU_5777	1	0	0	0	0	0	0	0	0	0	0	0	0	0	0	0	0	0	0	0	0	0	0	0
OTU_3276	2	0	0	0	0	0	0	0	0	0	0	0	0	0	0	0	0	0	0	0	0	0	0	0
OTU_5530	1	66	1	0	0	1	0	0	0	0	0	0	0	60	2	0	0	0	0	0	0	0	0	0
OTU_2839	1	0	0	0	0	0	0	0	0	0	0	0	0	0	0	0	0	0	0	0	0	0	0	2
OTU_2068	3	0	0	0	0	0	0	0	0	0	0	0	2	0	0	0	0	0	1	0	0	0	0	0
OTU_6303	1	0	0	0	0	0	0	0	0	0	0	0	0	0	0	0	0	0	0	0	0	0	0	0
OTU_4908	1	0	0	0	0	0	0	0	0	0	0	0	1	0	0	0	0	0	0	0	0	0	0	1
OTU_47	4	0	10	4	14	6	39	210	148	36	33	6	0	0	0	27	12	10	37	6	35	0	37	11
OTU_303	2	5	2	0	1	1	28	0	0	6	0	0	59	0	0	0	0	0	80	0	1	0	0	1
OTU_4552	6	0	0	0	0	0	0	0	0	0	0	0	0	1	0	0	0	0	0	0	0	0	0	1
OTU_6257	1	1	0	5	8	15	0	2	0	0	0	4	1	0	0	4	3	3	6	1	0	3	4	0
OTU_3040	1	0	0	0	0	1	0	2	1	3	2	5	0	0	0	0	0	0	0	2	2	0	0	1
OTU_353	5	2	0	11	22	6	0	1	5	0	6	18	0	0	0	0	2	15	8	16	0	0	1	4
OTU_6320	3	14	4	0	1	3	0	0	1	0	0	0	0	6	6	1	0	5	0	0	0	0	1	0
OTU_3275	1	0	0	0	0	0	0	0	0	0	0	0	0	0	0	0	0	0	0	0	0	0	0	0
OTU_120	1	28	8	0	19	23	0	2	11	0	0	0	0	4	7	10	11	8	0	1	1	0	7	5
OTU_1109	6	0	0	0	0	0	0	0	1	1	2	0	0	0	0	0	0	0	0	0	0	0	0	0
OTU_4315	4	1	1	1	1	0	1	0	0	0	0	0	0	2	0	0	0	0	2	0	0	0	0	0
OTU_1562	1	0	0	0	0	0	0	0	3	2	0	0	0	0	0	4	22	0	0	0	0	0	1	0
OTU_2059	19	0	0	0	0	0	0	0	0	0	0	0	0	0	0	0	0	0	2	0	0	0	0	0
OTU_3077	2	0	0	0	0	0	0	0	0	0	0	0	0	0	0	0	0	0	0	0	0	0	0	0
OTU_147	3	1	1	45	128	55	5	89	54	39	14	7	0	2	7	35	11	3	3	11	23	0	16	14
OTU_2219	5	0	2	0	1	0	6	0	0	0	0	0	4	3	0	4	0	0	3	0	0	0	0	1
OTU_5030	1	0	0	0	0	0	0	1	1	1	1	0	0	0	1	0	1	0	2	1	0	0	0	0
OTU_804	1	612	85	6	8	18	0	9	20	0	1	1	0	255	60	11	6	10	1	20	4	0	2	2
OTU_3267	5	0	0	0	0	0	0	0	0	0	0	0	0	0	0	0	0	0	0	0	0	0	0	0
OTU_6042	1	0	0	0	0	0	0	0	0	0	0	0	0	0	0	0	0	0	0	0	0	0	0	0
OTU_385	6	12	0	0	0	0	2	0	0	0	0	0	3	7	0	0	0	0	0	0	0	0	0	0
OTU_2370	3	0	0	0	0	0	0	0	0	0	0	0	0	0	0	0	0	0	0	0	0	0	0	0
OTU_4792	4	0	0	0	0	0	0	0	0	0	0	0	0	0	0	0	0	0	0	0	0	0	0	0
OTU_1151	1	0	0	0	0	0	0	0	0	0	0	0	0	0	0	0	0	0	3	0	0	0	0	0
OTU_556	2	6	3	1	0	1	0	0	10	0	0	0	1	2	3	0	0	0	2	1	0	0	0	0
OTU_145	2	5	2	3	8	5	0	6	10	0	7	5	0	3	0	10	8	2	1	10	2	2	3	11
OTU_1929	1	0	0	0	0	0	0	0	0	0	0	0	0	0	0	2	0	0	0	0	0	0	0	0
OTU_1161	1	0	0	0	1	1	0	0	0	0	0	0	1	0	0	1	0	0	28	1	0	0	0	0
OTU_2371	1	0	0	0	0	0	0	0	0	0	0	0	0	0	0	0	0	0	0	0	0	0	0	0
OTU_279	2	1	0	0	0	0	0	2	0	0	0	0	7	0	0	0	0	0	4	0	0	0	8	40
OTU_1094	3	3	4	0	0	0	0	0	0	0	0	0	0	2	1	0	0	0	0	0	0	0	1	4
OTU_3501	1	0	0	1	0	0	0	0	0	0	0	0	0	0	1	0	0	0	0	0	0	0	1	0
OTU_797	21	0	1	2	0	2	1	2	1	0	0	0	7	3	2	0	0	1	3	0	0	0	0	4
OTU_3116	1	0	0	0	0	0	1	0	0	0	0	0	1	0	0	0	0	0	0	0	0	0	0	0
OTU_4361	3	0	0	0	0	3	0	0	0	0	0	10	0	0	0	0	2	7	0	0	0	0	3	31
OTU_2229	2	6	0	0	3	1	15	96	41	27	2	4	0	0	0	5	0	0	0	4	34	0	3	0
OTU_5316	1	0	0	6	1	0	0	0	0	0	0	0	0	0	0	0	0	0	0	0	1	0	0	0
OTU_1279	1	0	0	0	0	0	1	0	0	0	0	1	0	0	0	0	0	0	0	0	0	0	0	0
OTU_2924	2	0	0	0	0	0	0	0	2	0	0	0	1	0	0	0	0	0	2	0	0	0	0	0
OTU_1159	4	0	0	0	0	0	0	0	0	0	0	0	0	0	0	0	0	0	0	2	0	0	0	0
OTU_7	2	3	6	133	571	702	10	4	5	2	16	29	2	2	20	378	511	490	0	0	36	13	32	95
OTU_1354	2	142	106	7	20	52	0	1	62	3	1	0	0	83	118	17	12	17	0	30	30	0	10	14
OTU_18	6	8	6	65	8	71	0	1	6	982	99	138	0	0	19	0	3	7	0	5	24	184	5	22
OTU_563	1	0	0	0	0	0	0	1	0	0	0	0	0	0	0	0	0	0	5	7	0	0	0	0
OTU_246	1	0	0	0	0	1	0	2	0	0	0	0	0	0	0	0	0	0	37	2	4	0	1	1
OTU_1012	3	0	0	0	0	0	2	0	0	0	0	0	7	0	0	0	0	0	0	0	0	0	0	0
OTU_3813	1	0	0	0	0	0	0	0	0	0	0	0	0	0	1	0	0	0	0	0	0	0	0	0
OTU_1211	3	0	0	0	0	5	1	0	0	0	0	0	0	0	0	0	0	0	0	0	0	0	0	0
OTU_5276	2	0	0	0	0	0	1	0	0	0	0	0	9	0	0	0	0	1	1	0	0	0	0	0
OTU_29	1	0	0	13	54	58	0	0	0	15	0	8	0	0	12	84	66	5	0	0	1	48	36	33
OTU_5368	2	0	0	0	0	0	0	0	0	0	0	0	1	0	0	0	0	0	0	0	0	0	0	0
OTU_140	6	0	3	1	7	172	0	0	6	2	10	83	0	4	0	1	2	9	1	54	8	100	5	23
OTU_783	1	9	0	0	0	0	0	1	0	0	0	0	0	7	0	0	0	0	0	0	0	0	0	0
OTU_3492	1	0	0	0	0	1	0	0	0	0	0	0	0	0	0	3	0	0	0	0	0	0	0	0
OTU_67	1	0	25	1	32	17	1	0	310	2	22	1	0	3	0	0	3	0	0	44	0	1	45	2
OTU_5977	2	0	0	0	0	0	0	0	0	0	0	0	1	0	0	0	0	0	0	0	0	0	0	0
OTU_196	1	0	0	0	0	0	0	2	0	0	0	0	65	1	0	0	0	0	0	0	0	0	4	39
OTU_840	4	0	0	0	0	0	1	0	0	0	0	0	0	0	2	0	0	0	0	0	0	0	0	0
OTU_3358	3	0	1	0	0	0	0	0	0	0	0	0	1	0	0	0	0	0	0	0	0	0	0	4
OTU_2086	1	0	0	0	0	0	0	0	0	0	0	0	0	0	0	0	0	0	0	0	0	0	0	0
OTU_2576	2	7	3	16	4	0	2	0	2	0	1	1	0	1	3	0	4	0	0	2	32	1	3	3
OTU_1110	4	0	2	0	0	1	0	0	0	0	0	0	0	1	0	0	0	0	0	0	0	0	0	0
OTU_387	4	6	5	1	1	2	1	11	23	0	0	0	0	11	3	5	2	2	17	5	16	0	0	0
OTU_6041	1	0	0	0	0	0	0	0	0	0	0	0	0	0	0	0	0	0	0	0	0	0	0	0
OTU_684	7	0	0	2	0	3	0	0	0	0	0	0	3	5	0	0	0	0	2	1	0	0	0	13
OTU_2535	1	0	1	0	1	0	0	0	1	0	0	0	0	0	0	0	1	0	0	0	0	1	0	0
OTU_5710	1	0	0	0	0	0	0	0	0	0	0	0	0	0	0	0	0	0	0	0	0	0	0	0
OTU_955	1	0	0	0	0	0	0	0	1	0	0	0	0	0	0	0	0	0	9	3	0	0	0	0
OTU_2303	1	0	0	0	0	0	0	0	0	0	0	0	0	0	0	0	0	0	0	0	0	0	0	0
OTU_5324	1	0	0	0	0	0	0	0	0	0	0	0	0	0	0	0	0	0	0	0	0	0	0	0
OTU_5843	1	0	0	0	0	0	0	0	0	0	0	0	0	0	0	0	0	0	0	0	0	0	0	0
OTU_799	5	3	15	0	6	5	0	0	0	0	0	0	0	0	17	1	2	9	0	0	0	0	3	2
OTU_1956	1	0	2	0	0	0	0	0	0	0	0	0	0	0	0	0	0	0	0	0	0	0	0	0
OTU_6237	1	0	0	0	0	0	0	0	0	0	0	0	0	0	0	0	0	0	0	0	0	0	0	0
OTU_212	3	251	9	0	0	0	0	1	0	0	0	0	1	107	2	0	0	0	0	3	0	0	0	0
OTU_4746	1	0	0	0	0	0	0	0	1	0	0	0	0	0	0	0	0	0	0	0	0	0	0	0
OTU_4067	1	0	0	0	0	0	0	0	0	0	0	0	0	0	0	0	0	0	0	0	0	0	0	0
OTU_5834	1	0	1	0	0	1	1	0	0	0	0	0	0	0	0	0	0	0	0	0	0	0	0	0
OTU_144	3	0	0	64	8	3	1	9	0	6	12	59	2	1	2	47	14	5	0	0	0	0	2	0
OTU_818	1	0	0	12	0	1	0	4	0	0	0	0	2	0	0	17	3	7	5	1	0	0	0	0
OTU_4031	1	0	0	0	0	0	0	0	0	0	0	0	0	2	0	0	0	0	0	1	0	0	0	0
OTU_2545	5	0	0	0	0	0	0	0	0	0	0	0	0	0	0	0	0	0	0	0	0	0	0	1
OTU_2087	3	0	0	0	0	0	0	0	0	0	0	0	0	0	0	0	0	0	0	0	0	0	0	0
OTU_3025	1	30	66	0	28	23	0	0	62	3	5	1	0	13	91	8	5	13	0	1	25	0	11	7
OTU_249	1	8	17	4	1	2	0	2	40	2	0	0	0	11	16	29	1	0	0	8	11	0	0	0
OTU_1617	4	0	0	0	0	0	0	0	0	0	0	0	0	0	0	0	0	0	0	0	0	0	0	0
OTU_112	3	5	2	18	33	26	2	0	3	0	0	0	8	9	16	40	16	21	3	2	0	0	1	6
OTU_4063	1	4	4	0	0	0	1	5	0	0	0	0	1	0	0	2	0	2	16	4	16	0	2	4
OTU_5937	2	0	0	1	3	1	1	0	1	0	0	1	0	0	0	0	0	1	1	0	1	1	0	1
OTU_254	2	204	78	3	2	2	0	11	23	0	0	0	2	84	65	4	3	0	0	14	27	0	1	2
OTU_4065	1	0	0	0	0	0	0	0	0	0	0	0	0	0	0	0	0	0	0	0	0	0	0	0
OTU_2840	1	0	0	0	0	0	0	0	0	0	0	1	0	0	0	0	0	0	0	0	0	0	0	0
OTU_215	1	0	0	0	0	0	1	0	0	0	0	0	2	0	0	0	0	0	44	1	0	0	0	0
OTU_809	1	0	0	0	0	1	2	0	0	0	0	0	31	2	0	0	0	0	0	0	0	0	0	1
OTU_3494	2	0	0	0	0	0	0	0	0	0	0	0	0	0	0	0	0	0	0	0	0	0	0	0
OTU_459	1	0	0	0	0	0	0	0	0	0	0	0	13	0	0	0	1	0	0	0	0	0	0	20
OTU_5411	1	12	71	0	0	2	0	0	0	0	0	0	1	32	110	0	0	1	0	2	0	0	0	0
OTU_2060	4	0	0	0	0	0	1	0	0	0	0	0	5	0	0	0	0	0	0	0	0	0	0	0
OTU_709	1	0	1	0	1	1	0	1	0	0	0	2	0	0	0	1	0	9	0	2	9	0	0	0
OTU_661	3	51	12	0	4	1	0	0	0	0	0	0	1	42	15	1	0	0	0	2	0	0	0	0
OTU_5319	1	0	0	0	0	0	0	0	0	0	0	0	0	0	0	0	0	0	0	0	0	0	0	0
OTU_5279	1	0	0	0	0	0	0	0	0	0	0	0	0	0	0	0	0	0	0	0	0	0	0	0
OTU_3212	1	0	0	0	0	0	0	0	0	0	0	0	0	0	0	0	0	0	2	3	0	0	0	0
OTU_3268	1	0	0	0	0	0	0	0	0	0	0	0	0	0	0	0	0	0	0	0	0	0	0	0
OTU_1621	1	0	0	0	0	0	1	0	0	0	0	0	1	0	0	0	0	0	0	0	0	0	0	0
OTU_157	1	156	4	1	1	12	21	1	0	0	0	0	117	47	0	1	0	1	15	0	0	0	4	48
OTU_4793	2	0	0	0	0	0	0	0	0	0	0	0	1	0	0	0	0	0	0	0	0	0	0	0
OTU_6364	1	0	1	0	0	0	0	0	0	0	0	0	0	0	0	0	0	0	0	0	0	0	0	0
OTU_5501	1	0	0	0	0	0	0	0	0	0	0	0	0	0	0	0	0	0	0	0	0	0	0	0
OTU_6619	2	11	17	0	3	7	0	0	0	0	0	0	1	20	4	0	0	1	0	0	0	0	1	0
OTU_1060	1	0	0	1	0	0	0	0	0	0	0	0	0	3	0	0	0	0	0	10	0	0	0	0
OTU_318	1	6	19	3	5	14	0	0	6	0	0	0	0	14	24	3	14	18	0	0	7	0	0	0
OTU_2474	1	0	0	0	0	0	0	0	3	0	0	0	0	0	0	0	0	0	0	0	0	0	0	0
OTU_1456	3	3	3	0	0	0	0	0	0	0	0	0	1	1	0	0	0	0	0	0	0	0	0	0
OTU_3269	1	0	0	0	0	0	0	0	0	0	0	0	0	0	0	0	0	0	1	0	0	0	0	4
OTU_3270	1	14	2	0	1	1	0	0	0	0	0	0	0	7	0	1	0	1	0	0	0	0	0	0
OTU_1277	3	4	0	0	0	0	1	0	0	0	0	0	1	1	0	0	0	0	0	0	0	0	0	4
OTU_3271	1	0	0	0	0	0	0	0	0	0	0	0	0	0	0	0	0	0	0	0	0	0	0	0
OTU_377	5	2	4	0	9	3	0	0	0	12	1	2	0	0	1	2	0	0	0	0	12	0	1	0
OTU_5440	2	0	0	0	0	0	0	0	0	0	0	0	0	0	0	0	0	0	0	0	0	0	0	0
OTU_6548	1	0	0	0	0	0	0	0	0	0	0	0	0	0	0	0	0	0	0	0	0	0	0	0
OTU_687	1	9	0	0	0	1	0	0	0	0	0	0	4	2	2	4	0	1	0	0	0	0	0	0
OTU_591	1	0	0	0	0	0	0	0	1	0	0	0	0	0	0	0	0	0	1	0	0	0	0	14
OTU_2891	1	0	0	0	0	0	0	0	0	0	0	0	0	0	0	0	0	0	0	2	0	0	0	0
OTU_6145	1	0	0	1	7	0	0	1	0	1	1	5	0	0	0	3	2	0	2	1	1	4	1	0
OTU_6459	1	0	0	0	0	0	0	0	0	0	0	0	0	0	0	0	0	0	0	0	0	0	0	0
OTU_1837	3	0	1	0	0	0	0	0	1	0	0	4	0	0	0	0	0	0	0	0	0	0	0	0
OTU_4547	2	0	0	0	0	0	0	0	0	0	0	0	0	0	0	0	0	0	1	1	0	0	0	1
OTU_4763	1	1	0	0	0	0	0	0	0	0	0	0	0	0	0	0	0	0	0	0	0	0	0	0
OTU_5146	1	1	0	0	0	0	0	0	0	0	0	0	0	0	0	0	0	0	0	0	0	0	0	0
OTU_566	1	0	0	0	0	0	0	0	0	0	0	0	0	0	0	0	10	0	0	0	0	0	0	0
OTU_3472	1	77	53	5	32	38	0	1	88	0	6	0	1	54	81	23	16	48	0	13	5	0	28	17
OTU_4435	1	0	0	0	0	0	0	1	0	0	0	0	1	0	0	0	0	0	4	0	0	0	0	0
OTU_1459	2	0	0	0	0	0	0	0	0	0	0	0	0	0	0	0	0	0	0	0	0	0	0	4
OTU_5140	1	0	0	0	0	0	0	0	0	0	0	0	0	0	0	0	0	0	0	0	0	0	0	0
OTU_3050	1	0	0	0	1	9	0	0	0	1	1	6	0	0	1	7	2	17	0	0	0	0	2	24
OTU_1291	2	0	0	13	8	4	0	1	2	0	0	0	0	1	2	65	31	71	0	3	1	4	0	14
OTU_6239	1	0	0	0	0	0	0	0	0	0	0	0	0	0	0	0	0	0	0	0	0	0	0	0
OTU_693	2	0	0	0	2	0	0	0	0	0	0	0	0	1	0	0	3	0	3	4	4	0	2	3
OTU_5521	2	0	1	0	1	0	4	33	12	1	1	0	0	0	0	1	0	0	0	0	1	0	0	0
OTU_6648	1	0	0	0	0	0	0	0	0	0	0	0	0	0	0	0	0	0	0	0	0	0	0	0
OTU_845	1	0	0	2	1	6	0	0	0	0	1	1	0	0	1	0	0	0	0	0	5	0	0	1
OTU_4196	1	0	0	0	0	0	0	0	0	0	0	0	0	0	0	0	0	0	0	0	0	0	0	0
OTU_3493	1	0	0	0	0	0	0	0	0	0	0	0	0	0	0	0	0	0	0	0	0	0	0	0
OTU_4039	1	1	2	0	1	2	0	0	0	0	0	0	0	1	0	0	0	0	0	0	0	0	0	0
OTU_2167	1	0	0	1	0	1	12	0	0	0	0	0	15	0	0	0	0	0	0	0	0	0	0	9
OTU_6040	1	0	0	0	0	0	0	0	0	0	0	0	1	0	0	0	0	0	0	0	0	0	0	0
OTU_570	1	17	6	1	0	1	0	0	4	0	0	0	1	0	3	0	0	2	3	0	0	0	0	0
OTU_3283	1	0	0	0	0	0	0	0	0	0	0	0	0	0	0	0	0	0	0	0	0	0	0	0
OTU_5141	2	0	1	0	0	1	0	0	2	0	0	0	0	1	0	0	0	0	0	0	0	0	0	2
OTU_4551	2	1	1	0	0	0	0	0	0	0	0	0	0	0	1	0	0	0	0	0	0	0	0	0
OTU_494	3	0	0	0	0	0	21	0	1	0	0	0	3	0	0	0	0	0	5	0	2	0	0	0
OTU_1940	1	1	0	0	0	1	0	2	0	0	0	8	0	0	2	1	0	0	7	2	2	0	1	0
OTU_1430	1	0	0	0	0	0	0	4	0	0	0	0	0	0	0	0	0	0	0	9	0	0	0	0
OTU_4013	3	0	0	0	0	0	0	0	0	0	0	0	0	0	0	0	0	0	0	0	0	0	0	0
OTU_3078	1	0	0	0	0	0	0	0	0	0	0	0	0	0	0	0	0	0	0	0	0	0	0	0
OTU_5850	1	0	0	0	0	0	0	0	0	0	0	0	0	0	0	0	0	0	0	0	0	0	0	0
OTU_1417	1	0	0	0	0	0	0	0	0	0	0	0	0	0	0	0	0	0	6	0	0	0	0	0
OTU_6646	4	0	0	0	0	0	1	0	0	0	0	1	1	0	0	0	0	0	0	0	0	0	0	0
OTU_166	1	2	1	1	3	24	1	3	1	1	0	3	0	1	0	2	0	22	2	8	0	0	0	1
OTU_822	1	0	0	0	1	0	0	0	0	0	0	0	14	1	0	0	0	0	1	0	0	0	0	3
OTU_5366	2	0	0	0	0	0	0	0	0	0	0	0	0	0	0	0	0	0	0	0	0	0	0	0
OTU_2539	3	0	0	0	0	0	0	0	0	0	0	0	0	0	0	0	0	0	0	0	0	0	0	0
OTU_52	3	11	20	733	16	1	0	0	0	54	0	0	0	0	0	0	0	0	0	0	0	0	0	0
OTU_3103	2	0	0	0	0	0	0	0	0	0	0	0	0	0	0	0	0	0	0	0	0	0	0	0
OTU_5277	1	0	0	0	0	0	0	0	0	0	0	0	0	0	0	0	0	0	0	0	0	0	0	0
OTU_747	1	1	0	0	0	0	0	1	0	0	0	0	1	0	0	1	0	0	13	0	0	0	0	0
OTU_865	1	224	152	5	71	69	1	4	109	5	6	3	1	84	191	31	22	30	0	40	39	0	25	44
OTU_2322	2	0	0	0	0	0	0	0	0	0	0	0	4	0	0	0	0	0	0	0	0	0	0	0
OTU_3272	1	0	0	0	0	0	0	0	0	0	0	0	0	0	0	0	0	0	0	0	0	0	0	0
OTU_2855	1	0	0	0	0	0	0	0	0	0	0	2	0	0	0	0	1	0	0	2	0	0	0	0
OTU_3688	1	0	3	9	1	4	0	0	15	18	8	9	0	0	0	0	0	1	0	6	4	0	1	1
OTU_341	1	0	0	0	4	0	0	0	0	0	0	0	0	0	0	18	15	1	0	0	0	0	17	0
OTU_5583	2	0	0	0	0	0	0	1	0	0	0	0	1	0	0	0	0	0	0	0	0	0	0	2
OTU_4571	1	0	0	0	0	0	0	0	0	0	0	0	0	0	0	0	0	1	0	0	0	0	0	0
OTU_369	1	0	0	0	0	0	0	0	0	0	0	0	0	0	0	0	0	0	0	0	0	0	0	13
OTU_2630	1	6	0	0	0	0	0	0	0	0	0	0	0	1	0	0	0	0	0	0	0	0	0	0
OTU_2754	1	0	9	0	1	4	0	0	0	0	0	0	0	2	12	3	2	2	0	0	0	0	0	0
OTU_589	2	0	0	4	1	0	0	0	0	0	2	2	0	0	0	0	3	0	0	0	0	1	0	3
OTU_2480	1	0	0	14	9	11	0	4	3	1	1	30	4	0	1	4	3	5	2	3	1	4	0	2
OTU_2788	1	0	0	0	0	0	1	0	0	0	0	0	0	0	0	0	0	0	0	0	0	0	0	0
OTU_455	1	9	0	0	0	0	0	0	3	0	0	0	0	4	5	0	0	0	0	0	0	0	0	0
OTU_3495	1	0	0	0	0	0	0	0	0	0	0	0	0	1	0	0	0	0	0	0	0	0	0	0
OTU_5325	1	0	0	0	0	0	0	0	0	0	0	0	0	0	0	0	0	0	0	0	0	0	0	0
OTU_1843	1	0	0	0	0	0	0	0	0	0	0	0	0	0	0	3	2	0	0	1	0	0	0	0
OTU_3277	2	0	0	0	0	0	0	0	0	0	0	0	3	0	0	0	0	0	0	0	0	0	0	0
OTU_6562	1	1	0	0	0	13	0	0	0	12	1	11	0	0	1	0	0	0	0	1	2	2	0	2
OTU_511	2	4	1	0	0	0	0	0	0	0	0	0	3	5	0	1	0	0	0	0	0	0	0	24
OTU_2126	1	0	1	0	2	0	0	1	5	53	1	1	0	0	1	1	11	2	18	6	58	0	6	1
OTU_6057	1	1	1	7	10	27	0	0	3	0	4	21	0	0	0	8	26	69	0	0	3	1	36	111
OTU_26	1	127	144	18	65	126	0	7	132	8	12	1	0	67	200	56	44	74	0	14	76	2	36	43
OTU_2462	1	0	0	0	0	0	1	0	0	0	0	0	8	1	0	0	0	0	0	0	0	0	0	0
OTU_5551	1	0	0	0	1	3	0	0	1	1	1	1	0	0	0	0	0	0	0	0	0	0	0	0
OTU_5626	2	0	0	0	0	0	0	0	0	0	0	0	0	0	0	0	0	0	0	0	0	0	0	0
OTU_4181	1	0	1	0	0	0	0	0	0	0	0	0	1	0	0	0	0	0	0	0	0	0	0	5
OTU_2091	1	0	0	0	0	0	0	0	0	0	0	0	0	0	0	0	0	0	0	0	0	0	0	0
OTU_4620	1	0	0	0	0	0	0	0	0	0	0	0	0	0	0	0	0	0	0	0	0	0	0	0
OTU_5210	1	0	0	0	0	0	0	0	0	0	0	0	0	0	0	0	0	0	0	0	0	0	0	0
OTU_2081	1	10	0	0	0	0	0	0	0	0	0	0	3	7	0	0	0	0	0	0	0	0	0	0
OTU_2874	1	56	67	2	5	13	0	0	15	0	0	0	0	34	50	4	1	17	0	6	7	0	7	9
OTU_2405	1	0	0	0	0	0	0	0	0	0	0	0	0	0	0	0	0	0	0	0	0	0	0	0
OTU_3820	1	1	0	0	0	0	0	0	0	0	0	0	0	0	0	0	0	0	0	0	0	0	0	0
OTU_2090	1	0	0	0	0	0	0	0	0	0	0	0	0	0	0	0	0	0	0	0	0	0	0	0
OTU_3570	1	0	0	31	2	2	0	0	0	16	0	3	0	0	0	0	0	0	1	1	0	0	0	1
OTU_5787	1	0	0	0	0	0	0	0	0	0	0	0	0	0	0	0	0	0	0	0	0	0	0	0
OTU_1273	1	0	4	0	2	0	0	0	0	0	0	0	0	0	15	3	0	2	0	0	0	0	0	0
OTU_3169	1	2	0	0	0	1	0	0	0	0	0	0	0	1	1	2	0	2	0	1	0	0	1	0
OTU_5274	1	0	0	0	0	0	1	0	0	0	0	0	0	0	0	0	0	0	0	0	0	0	0	0
OTU_2813	1	0	0	0	0	0	0	0	0	0	0	0	0	0	0	0	0	0	0	0	2	0	0	0
OTU_2838	1	0	0	0	0	0	0	0	0	0	0	0	0	0	0	0	0	0	0	0	0	0	0	0
OTU_4009	1	0	0	6	0	1	0	0	0	0	0	0	0	0	0	0	0	0	1	2	0	0	0	0
OTU_3359	1	0	0	0	0	0	0	0	0	0	0	0	0	0	0	0	0	0	0	0	0	0	0	0
OTU_2236	1	4	2	0	0	0	0	0	0	0	0	0	0	2	3	1	0	0	0	0	4	0	0	0
OTU_1792	2	0	0	0	0	0	2	0	0	0	0	0	0	0	0	0	0	0	1	0	0	0	0	0
OTU_4050	1	0	0	0	0	0	0	0	0	0	0	0	0	0	0	0	0	0	0	0	0	0	0	0
OTU_373	1	0	0	0	0	1	0	0	1	0	0	0	1	1	0	0	0	0	53	2	0	0	0	0
OTU_2527	1	0	0	0	0	0	0	0	1	0	0	0	0	0	0	0	0	0	0	5	0	0	0	0
OTU_4292	1	0	1	0	0	0	0	0	0	0	0	0	0	0	0	0	0	0	0	1	0	0	0	0
OTU_4049	1	0	0	0	0	0	0	0	0	0	0	0	1	0	0	0	0	0	0	0	0	0	0	0
OTU_6642	1	0	0	0	0	0	0	0	0	0	0	0	0	0	0	0	0	0	0	0	0	0	0	0
OTU_1473	1	9	12	0	1	1	0	1	0	0	0	0	0	3	38	0	1	2	0	0	0	0	0	4
OTU_2089	1	0	0	0	0	0	0	1	2	0	0	0	7	3	0	0	0	0	1	0	0	0	0	0
OTU_5502	1	1	0	0	0	1	1	0	0	0	0	0	0	2	0	0	0	0	0	0	0	0	0	0
OTU_2213	1	0	0	0	1	0	0	0	0	0	0	0	0	0	0	0	0	0	2	0	1	0	0	0
OTU_4595	1	0	0	0	0	0	0	0	0	0	0	0	2	0	0	0	0	0	1	9	0	0	0	1
OTU_5849	1	0	0	0	0	0	0	0	0	0	0	0	0	0	0	0	0	0	0	0	0	0	0	0
OTU_4801	1	0	0	0	0	0	0	0	0	0	0	0	0	0	0	0	0	0	3	0	0	0	0	0
OTU_5699	1	1	4	0	0	0	0	0	0	0	0	0	0	0	0	0	0	0	0	0	1	0	0	0
OTU_3926	1	0	0	0	0	0	0	1	0	0	0	0	1	0	0	0	0	0	5	0	0	0	0	0
OTU_5275	1	0	0	0	0	0	0	0	0	0	0	0	0	0	0	0	0	0	0	0	0	0	0	0
OTU_1189	2	0	1	0	0	1	0	0	0	0	0	0	0	0	0	0	0	1	0	0	0	0	6	4
OTU_6460	1	0	0	0	0	0	0	0	0	0	0	0	0	0	0	0	0	0	0	0	0	0	0	0
OTU_4265	2	1	0	3	0	1	0	0	2	5	2	8	0	0	0	0	1	0	0	2	3	0	0	2
OTU_6180	1	0	0	0	0	0	0	0	0	0	0	0	0	0	0	0	0	0	0	0	0	0	0	0
OTU_6181	1	0	0	0	0	0	0	0	0	0	0	0	0	0	0	0	0	0	0	0	0	0	0	0
OTU_2888	1	0	0	3	2	8	0	0	0	0	0	5	0	0	0	0	5	25	0	0	0	0	11	36
OTU_4800	1	0	0	0	0	0	0	0	0	0	0	0	0	0	0	0	0	0	0	0	0	0	0	0
OTU_6127	1	0	0	0	0	0	0	0	0	0	0	0	5	0	0	0	0	0	0	0	0	0	0	0
OTU_2227	1	0	0	0	0	0	0	0	0	0	0	0	0	0	0	0	0	0	0	1	0	0	0	0
OTU_2402	1	0	0	0	0	0	0	0	0	0	0	0	0	0	0	0	0	0	0	0	0	0	0	0
OTU_3553	1	1	1	0	0	0	0	0	0	0	0	0	0	0	2	0	0	0	0	0	0	0	1	0
OTU_5823	1	37	18	1	13	7	0	0	4	1	2	0	0	22	23	4	1	7	0	4	5	0	1	2
OTU_3550	1	0	0	0	1	0	0	0	0	0	0	0	0	0	0	0	0	0	0	0	0	0	0	0
OTU_1953	1	1	0	3	0	3	0	5	0	1	0	1	0	1	1	1	1	0	11	1	0	0	0	0
OTU_6360	1	0	0	0	0	0	0	0	0	0	0	0	0	0	0	0	0	0	0	0	0	0	0	0
OTU_4088	1	0	1	0	0	0	0	0	0	0	0	0	0	0	0	0	0	0	0	1	0	0	0	0
OTU_2305	1	0	0	0	0	0	0	0	0	0	0	0	0	0	0	0	0	0	0	0	0	0	0	0
OTU_5967	1	0	0	0	0	0	0	0	0	0	0	0	2	1	0	0	0	0	0	0	0	0	0	0
OTU_5713	1	0	0	0	0	0	0	0	0	0	0	0	0	0	0	0	0	0	0	0	0	0	0	0
OTU_5203	1	0	0	0	0	0	0	0	0	0	0	0	0	0	0	0	0	0	0	0	0	0	0	0
OTU_4191	1	2	0	0	0	0	4	0	0	0	0	0	37	0	0	0	0	0	6	0	0	0	0	2
OTU_5588	1	33	19	0	3	3	0	0	9	0	0	1	1	16	11	0	1	0	0	1	3	0	0	0
OTU_3691	1	0	0	0	0	0	0	1	1	1	0	0	0	0	0	0	0	0	0	0	0	0	0	0
OTU_4007	0	3	0	0	0	0	0	0	0	0	0	0	0	2	0	0	0	0	0	0	0	0	0	0
OTU_182	0	45	52	0	0	0	0	0	9	0	0	0	1	17	43	3	0	2	0	2	0	0	0	0
OTU_753	0	6	0	0	0	0	0	1	1	0	0	0	0	0	0	0	0	0	0	0	1	0	0	0
OTU_319	0	63	15	3	12	0	0	0	9	0	0	5	0	20	33	0	1	0	0	3	16	0	1	0
OTU_517	0	42	20	0	0	0	0	0	2	0	0	0	0	15	7	0	0	0	0	0	0	0	0	0
OTU_4008	0	11	0	0	0	0	0	0	0	0	0	0	0	1	0	0	0	0	0	0	0	0	0	0
OTU_1669	0	41	2	0	0	0	0	0	0	0	0	0	1	16	2	0	0	0	0	4	0	0	0	0
OTU_5544	0	4	33	0	0	2	0	0	3	0	0	0	0	6	20	0	5	1	0	1	1	0	1	0
OTU_2084	0	3	0	0	1	0	0	0	0	0	0	0	0	0	0	0	1	0	0	0	0	0	0	0
OTU_210	0	193	70	2	22	52	0	0	41	5	0	1	4	78	68	5	7	16	0	12	28	0	17	10
OTU_962	1	161	77	10	17	53	0	4	64	1	2	0	1	43	104	8	9	7	0	17	52	0	14	12
OTU_2594	0	32	1	0	0	0	0	0	0	0	0	0	1	8	0	0	0	0	0	0	0	0	0	0
OTU_74	0	151	297	32	138	222	0	1	127	2	4	4	0	76	357	58	53	119	0	25	48	0	37	38
OTU_505	0	76	0	0	0	0	0	4	1	0	0	0	2	79	5	0	0	0	0	23	2	0	0	0
OTU_34	0	63	227	12	83	182	0	1	63	5	1	0	1	28	188	69	44	178	0	1	4	0	83	18
OTU_1584	0	3	0	0	0	0	0	0	0	0	0	0	0	0	0	0	0	0	0	0	2	0	0	0
OTU_657	0	5	11	0	0	5	0	1	0	0	0	0	0	1	40	0	0	0	0	0	0	0	0	0
OTU_2653	0	1	0	0	0	0	0	0	0	0	0	0	0	0	1	0	0	0	0	0	2	0	0	0
OTU_3187	0	25	14	2	5	4	0	0	11	0	3	0	0	19	16	1	2	13	0	0	3	0	2	13
OTU_532	0	100	114	4	17	21	0	0	1	0	0	0	0	39	163	9	18	32	0	0	0	0	1	3
OTU_2159	0	39	10	0	2	7	0	0	14	0	0	0	0	23	20	2	1	3	0	2	2	0	1	2
OTU_895	0	12	3	0	0	0	0	0	0	0	0	0	0	1	1	0	0	0	0	0	0	0	0	0
OTU_77	0	38	62	11	8	36	0	0	14	0	4	0	0	18	94	1	4	14	0	0	3	0	2	1
OTU_673	0	15	0	0	0	0	0	0	0	0	0	0	0	0	0	0	0	0	0	0	0	0	0	0
OTU_6359	0	107	257	33	29	76	0	0	73	9	1	12	7	67	214	36	11	43	0	10	21	0	17	23
OTU_869	0	8	0	41	1	0	1976	2427	0	0	0	0	0	0	0	4	0	153	0	0	2	0	4	2
OTU_879	0	48	29	1	18	18	0	2	25	0	2	2	0	15	34	1	3	7	0	11	6	0	5	10
OTU_1196	0	16	0	0	0	0	0	0	0	0	0	0	0	6	3	0	0	0	0	0	0	0	0	0
OTU_117	0	45	43	8	38	49	0	0	20	0	0	1	0	7	50	12	10	47	0	6	14	0	26	13
OTU_197	0	52	42	2	2	7	0	4	22	0	0	0	0	29	53	5	4	1	1	14	12	0	0	0
OTU_2365	0	24	21	1	3	10	0	0	19	0	1	0	0	13	51	7	3	14	0	17	23	0	1	9
OTU_128	0	7	32	5	25	27	0	0	0	0	0	0	0	4	47	8	24	40	0	0	0	0	0	1
OTU_480	0	38	3	0	0	0	0	3	4	0	0	0	0	13	9	0	0	3	0	0	0	0	0	0
OTU_325	0	50	0	0	0	0	0	0	0	0	0	0	0	12	0	0	0	0	0	7	0	0	0	0
OTU_1424	0	6	0	0	0	0	0	0	0	0	0	0	0	0	0	0	0	0	0	0	0	0	0	0
OTU_5104	0	4	3	7	0	0	0	0	0	0	0	0	0	2	3	0	0	0	0	0	0	0	0	0
OTU_5	0	32	0	104	1	0	6052	7429	4	0	0	0	0	1	0	10	3	495	0	0	25	0	3	5
OTU_4414	0	25	7	3	10	4	0	27	16	0	2	4	0	5	0	4	6	4	3	37	0	0	7	5
OTU_3110	0	6	2	0	0	0	0	0	0	0	0	0	0	5	1	0	0	0	0	0	0	0	0	0
OTU_866	0	16	3	0	1	4	0	0	1	0	0	0	0	10	2	0	1	0	0	0	0	0	0	0
OTU_1990	0	6	1	0	0	0	0	0	0	0	0	0	0	4	1	0	0	1	0	1	0	0	0	0
OTU_264	0	53	23	3	8	17	0	1	3	0	0	0	0	14	18	9	2	1	0	0	0	0	0	0
OTU_21	0	273	798	20	79	144	0	10	680	7	7	11	1	388	1109	75	97	157	5	39	28	0	79	56
OTU_1150	0	7	3	0	0	0	0	0	0	0	0	0	0	1	2	0	0	0	3	5	9	0	0	9
OTU_5798	0	2	1	0	0	14	0	0	1	0	0	0	0	0	0	1	0	2	0	0	0	0	0	0
OTU_1075	0	3	0	0	1	0	0	0	4	4	0	0	0	0	1	2	0	0	0	0	5	0	0	0
OTU_531	0	6	0	0	0	0	1	0	0	0	0	0	5	0	0	0	0	0	2	0	0	0	0	0
OTU_3469	0	18	0	0	0	0	0	0	0	0	0	0	0	7	1	0	0	0	0	0	0	0	0	0
OTU_4550	0	3	0	0	0	0	0	0	0	0	0	0	0	1	0	0	0	0	0	0	0	0	0	0
OTU_219	0	441	22	20	33	72	0	0	0	0	0	0	0	182	40	32	36	49	0	5	0	0	0	2
OTU_1319	0	9	0	0	0	1	0	0	0	0	0	0	0	0	0	0	0	0	0	0	0	0	0	0
OTU_2626	0	30	19	3	2	8	0	0	23	1	0	0	0	11	27	1	2	10	0	13	5	0	8	6
OTU_133	0	6	0	0	0	0	0	43	16	0	0	1	2	0	1	1	0	2	279	92	7	0	4	5
OTU_407	0	16	9	0	1	1	0	0	0	0	0	0	0	3	13	3	0	0	0	0	0	0	0	0
OTU_161	0	10	2	6	2	4	0	1	5	0	2	0	0	1	0	0	0	19	8	0	8	0	7	6
OTU_146	0	16	34	3	5	12	0	0	1	0	0	0	0	5	22	6	3	9	0	0	0	0	0	0
OTU_6080	0	2	15	0	0	1	0	0	1	0	0	0	0	4	18	0	0	0	0	1	0	0	0	0
OTU_232	0	9	8	8	33	14	0	0	0	0	0	0	0	4	2	11	16	16	0	0	0	0	0	0
OTU_3992	0	4	1	0	0	1	0	0	0	0	0	0	0	0	0	1	0	0	0	0	0	0	0	0
OTU_574	0	22	4	0	0	3	0	1	1	0	0	0	0	7	7	1	4	1	0	0	0	0	0	0
OTU_5712	0	1	0	0	0	0	0	0	1	0	0	0	0	0	0	0	0	0	0	0	0	0	0	0
OTU_1346	0	6	0	0	0	0	0	0	0	0	0	0	0	2	0	0	0	0	0	0	0	0	0	0
OTU_351	0	9	7	1	8	7	0	1	1	0	0	0	0	2	9	28	7	0	0	0	0	0	0	0
OTU_6159	0	13	7	0	0	2	0	0	0	0	0	0	0	9	4	0	1	0	0	0	0	0	1	1
OTU_5013	0	15	13	1	3	5	0	0	10	0	0	0	0	7	9	2	3	3	0	2	3	0	1	3
OTU_6248	0	15	0	0	0	0	0	0	0	0	0	0	0	9	0	0	0	0	0	0	0	0	0	0
OTU_201	0	162	282	1	23	43	0	0	3	0	0	0	1	131	251	21	9	37	0	2	1	0	0	0
OTU_988	0	4	0	3	5	10	1	0	1	0	0	0	6	3	2	18	7	3	36	0	0	0	0	0
OTU_102	0	47	34	24	29	36	0	0	1	0	0	2	0	14	39	60	43	12	0	3	0	0	0	6
OTU_316	0	24	33	2	6	4	0	0	0	0	0	0	0	6	5	4	4	10	0	0	0	0	0	2
OTU_155	0	290	3	0	0	1	0	4	0	0	0	0	0	137	0	0	0	0	0	9	0	0	0	0
OTU_2204	0	116	1	0	0	0	0	0	0	0	0	0	1	131	0	0	0	0	0	1	0	0	0	1
OTU_2040	0	5	0	0	0	0	0	0	0	0	0	0	0	3	2	0	0	0	0	0	0	0	0	0
OTU_1039	0	12	0	0	0	0	3	1	0	0	0	0	8	0	0	0	0	0	58	0	0	0	0	2
OTU_3999	0	4	0	0	0	0	0	0	0	0	0	0	0	0	0	0	0	0	0	0	0	0	0	0
OTU_431	0	17	0	0	0	0	0	3	3	0	0	0	0	2	0	0	0	1	1	1	4	0	0	0
OTU_1667	0	7	0	0	0	0	0	0	0	0	0	0	5	0	0	0	0	0	0	2	0	0	0	0
OTU_2534	0	4	0	0	0	0	0	0	0	0	0	0	0	0	0	0	0	0	0	0	0	0	0	0
OTU_4777	0	12	7	0	1	1	0	0	6	0	0	0	0	1	13	0	1	0	0	0	2	0	0	0
OTU_3467	0	16	0	0	0	0	0	0	0	0	0	0	0	18	0	0	0	0	0	0	0	0	0	0
OTU_2730	0	15	0	0	0	0	0	0	0	0	0	0	0	5	0	0	0	0	0	0	0	0	0	0
OTU_1520	0	1	0	0	1	3	0	0	0	0	0	2	0	0	0	0	0	0	0	0	0	0	0	0
OTU_1250	0	12	0	0	0	0	0	0	0	0	0	0	0	0	0	0	0	0	0	0	0	0	0	0
OTU_248	0	9	80	19	34	26	0	1	1	1	0	0	0	6	52	26	6	42	0	0	0	0	0	0
OTU_2720	0	2	0	0	0	0	0	0	0	0	0	0	0	0	0	0	0	0	0	4	0	0	0	0
OTU_4919	0	44	7	0	0	5	0	0	0	0	0	0	2	18	15	1	0	3	0	3	0	0	0	0
OTU_6407	0	48	12	0	0	0	0	0	0	0	0	0	0	22	5	1	0	0	0	0	0	0	0	0
OTU_2282	0	72	66	0	8	11	0	2	45	0	0	0	1	55	67	7	17	14	0	0	4	0	16	0
OTU_2077	0	5	0	0	0	0	0	0	0	0	0	0	0	1	0	0	0	0	0	0	0	0	0	0
OTU_595	0	32	30	4	24	12	0	0	27	0	3	1	0	13	44	7	3	14	0	1	9	0	15	13
OTU_1870	0	3	0	0	0	0	0	0	0	0	0	0	0	1	0	0	0	0	0	0	0	0	0	0
OTU_3313	0	24	12	0	0	2	0	0	4	0	0	0	0	7	14	0	1	0	0	0	4	0	0	0
OTU_628	0	4	1	1	15	8	0	1	2	0	0	0	0	1	6	0	0	15	0	0	0	0	0	0
OTU_4047	0	18	0	0	0	0	0	1	0	0	0	0	0	17	0	0	0	0	0	0	0	0	0	0
OTU_1989	0	15	0	0	0	0	0	0	0	0	0	0	0	2	0	0	0	0	0	0	0	0	0	0
OTU_2606	0	2	0	0	0	0	0	0	0	0	0	0	0	0	0	0	0	0	0	0	0	0	0	0
OTU_666	0	13	7	2	1	1	0	0	4	0	0	0	0	1	1	10	1	3	0	0	0	0	0	1
OTU_2404	0	6	0	0	0	0	0	0	0	0	0	0	0	0	0	0	0	0	0	0	0	0	0	0
OTU_3824	0	1	0	0	0	0	0	1	0	0	0	0	0	0	0	0	0	0	0	0	0	0	0	0
OTU_1578	0	1	0	0	1	0	0	0	1	0	0	0	6	0	0	0	0	0	13	0	0	0	0	0
OTU_278	0	52	48	3	4	5	0	0	14	0	0	0	0	31	71	5	3	6	0	3	0	0	2	1
OTU_965	0	19	13	0	1	0	0	0	1	0	0	0	0	27	11	0	0	0	0	2	0	0	0	0
OTU_2262	0	60	215	7	1	9	0	0	26	0	0	1	0	26	162	7	3	0	0	7	12	0	0	0
OTU_3642	0	33	0	0	0	0	0	0	0	0	0	0	0	18	0	0	0	0	0	5	0	0	0	0
OTU_3438	0	4	5	0	0	1	0	0	0	0	0	0	0	1	11	1	0	0	0	3	0	0	0	0
OTU_1177	0	24	1	0	0	0	1	0	0	0	0	0	0	14	4	0	0	0	0	0	0	0	0	0
OTU_4048	0	32	0	0	0	0	0	1	0	0	0	0	0	75	0	0	0	0	0	0	0	0	0	0
OTU_1825	0	7	0	0	0	2	0	0	0	0	0	0	0	2	0	0	0	0	0	0	0	0	0	0
OTU_706	0	12	0	0	0	0	0	0	0	0	0	0	0	1	0	0	0	0	0	0	0	0	0	0
OTU_158	0	32	57	5	23	49	0	0	0	0	0	0	0	22	90	11	11	30	0	2	0	0	5	8
OTU_3503	0	3	1	0	0	0	0	0	0	0	0	0	0	1	0	0	0	0	0	0	0	0	0	0
OTU_952	0	20	3	1	0	2	0	0	2	0	0	0	0	17	10	0	0	1	0	0	0	0	0	0
OTU_361	0	33	7	0	0	1	0	0	0	0	0	0	0	9	7	0	0	0	0	0	0	0	0	0
OTU_1057	0	20	7	0	3	3	0	2	0	0	0	0	0	12	18	1	0	8	0	0	0	0	0	0
OTU_404	0	1	7	1	6	11	0	0	16	0	0	0	0	1	3	4	2	11	0	2	1	0	1	7
OTU_84	0	9	4	4	3	4	0	2	38	6	3	3	0	1	11	22	3	3	0	8	8	0	10	28
OTU_399	0	167	159	2	3	7	0	4	142	0	1	2	0	279	181	6	5	6	0	58	3	0	9	4
OTU_3102	0	5	0	0	1	0	0	0	0	0	0	0	0	1	0	0	0	0	0	0	0	0	0	0
OTU_6171	0	3	0	0	0	0	0	0	1	0	0	0	0	2	1	0	0	0	0	0	0	0	0	0
OTU_4187	0	5	0	0	0	0	0	0	0	0	0	0	0	0	0	0	0	0	0	0	0	0	0	0
OTU_1132	0	83	17	2	0	6	0	0	0	0	0	0	0	49	24	9	0	0	0	1	4	0	0	0
OTU_907	0	13	0	0	2	1	0	0	0	0	0	0	0	1	7	0	4	0	0	0	0	0	0	0
OTU_5974	0	102	2	1	0	0	0	2	0	0	0	0	2	29	0	0	0	1	6	3	0	0	0	0
OTU_949	0	1	1	0	3	0	0	0	3	0	0	0	0	1	1	0	1	2	0	0	0	0	0	0
OTU_978	0	2	1	0	0	1	0	6	3	0	0	0	0	2	2	0	0	0	4	0	0	0	0	0
OTU_6079	0	12	5	0	0	0	0	0	0	0	0	0	0	8	12	0	0	0	0	0	0	0	0	0
OTU_880	0	33	5	0	0	0	0	0	3	0	0	0	0	21	11	0	0	0	0	3	2	0	0	0
OTU_103	0	151	166	1	1	6	0	3	11	0	0	0	0	60	142	2	2	3	0	8	5	0	0	0
OTU_1460	0	27	0	0	0	0	0	2	0	0	0	0	0	23	5	0	0	0	0	0	0	0	0	0
OTU_4010	0	1	0	0	2	0	0	0	0	0	0	0	0	0	0	0	0	0	0	0	0	0	0	0
OTU_3821	0	2	0	0	0	0	0	0	0	0	0	0	0	0	0	0	0	0	0	0	0	0	0	0
OTU_946	0	20	22	1	1	0	0	0	0	0	0	0	0	7	11	6	0	0	0	0	0	0	0	0
OTU_315	0	7	1	1	0	3	0	10	6	0	0	0	0	2	2	0	0	0	6	0	26	0	4	4
OTU_176	0	51	11	0	16	49	0	11	6	0	1	0	2	7	14	3	1	21	2	5	9	0	6	11
OTU_732	0	35	1	0	0	0	0	0	0	0	0	0	0	37	0	0	0	0	0	4	0	0	0	0
OTU_177	0	39	25	1	3	1	0	0	11	0	0	0	0	20	21	16	2	2	0	0	3	0	0	1
OTU_41	0	10	142	22	85	131	0	2	364	7	10	4	1	8	314	67	73	169	0	2	23	0	110	82
OTU_2780	0	3	5	0	0	2	0	0	0	0	0	0	0	1	9	3	0	0	0	0	0	0	0	0
OTU_3104	0	11	2	0	0	0	0	1	0	0	0	0	0	3	0	2	0	0	0	1	0	0	0	0
OTU_860	0	12	14	0	0	0	0	0	1	0	0	0	0	8	8	0	0	0	0	0	0	0	0	0
OTU_601	0	21	0	0	0	0	0	0	1	0	0	0	0	8	0	0	0	0	0	10	0	0	0	0
OTU_6461	0	6	0	0	0	0	0	0	0	0	0	0	0	15	0	0	0	0	0	0	0	0	0	0
OTU_979	0	9	20	0	1	7	0	0	0	0	0	0	0	14	36	13	4	0	0	3	0	0	0	0
OTU_514	0	11	0	0	0	0	0	0	0	0	0	0	0	0	0	0	0	0	0	0	0	0	0	0
OTU_668	0	5	2	1	2	1	0	2	2	0	0	0	0	6	10	0	0	0	0	7	2	0	0	0
OTU_2276	0	3	0	0	0	0	0	0	0	0	0	0	0	0	2	0	0	0	0	0	0	0	0	0
OTU_3433	0	1	0	0	0	0	0	0	0	0	0	0	0	0	0	0	0	0	0	0	0	0	0	0
OTU_3086	0	49	0	0	0	0	0	0	0	0	0	0	0	38	0	0	0	0	0	0	0	0	0	0
OTU_2547	0	3	3	0	0	0	0	0	0	0	0	0	0	4	0	0	0	0	0	0	1	0	0	0
OTU_365	0	4	0	0	0	0	0	3	12	0	0	0	0	1	0	0	0	0	0	1	0	0	0	0
OTU_257	0	10	0	0	1	4	2	14	3	0	0	0	7	0	0	2	1	0	24	8	0	0	0	2
OTU_2304	0	8	0	0	0	0	0	0	0	0	0	0	0	2	0	0	0	0	0	0	0	0	0	0
OTU_6039	0	13	4	5	2	3	0	0	3	0	0	0	0	0	10	0	0	0	0	0	0	0	0	0
OTU_3744	0	3	0	0	0	0	0	0	0	0	0	0	0	1	0	0	0	0	0	0	0	0	0	0
OTU_2021	0	3	0	0	0	0	0	0	0	0	0	0	0	0	0	0	0	0	0	0	0	0	0	0
OTU_938	0	6	0	0	0	0	0	0	0	0	0	0	0	2	0	0	0	0	0	0	0	0	0	0
OTU_3002	0	16	2	0	0	0	0	1	11	0	0	0	0	2	0	0	0	0	0	5	0	0	0	0
OTU_1114	0	9	0	0	0	0	0	0	0	0	0	0	0	2	0	0	0	0	0	1	0	0	0	0
OTU_3280	0	4	0	0	0	0	0	0	0	0	0	0	0	0	0	0	0	0	0	0	0	0	0	0
OTU_457	0	1	8	0	0	0	0	5	91	0	0	0	0	1	6	0	0	0	0	3	53	0	0	0
OTU_2781	0	12	0	0	0	0	0	0	0	0	0	0	0	2	0	0	0	0	0	0	0	0	0	0
OTU_1842	0	11	2	0	0	0	0	0	0	0	0	0	0	0	0	0	0	0	0	0	0	0	0	0
OTU_70	0	48	36	6	24	27	0	1	7	0	0	0	0	19	65	35	17	13	0	0	4	0	3	0
OTU_974	0	7	0	0	0	1	0	1	2	0	0	0	0	5	1	1	0	1	0	0	0	0	0	2
OTU_410	0	8	0	0	0	0	0	5	0	0	0	0	0	0	0	0	0	0	0	2	0	0	0	2
OTU_1396	0	6	0	0	0	0	0	0	0	0	0	0	0	4	0	0	0	0	0	0	0	0	0	0
OTU_5845	0	1	0	0	0	0	0	0	0	0	0	0	0	0	0	0	0	0	0	0	0	0	0	0
OTU_637	0	19	5	2	0	0	0	3	3	0	0	1	0	3	3	3	0	0	0	7	0	0	0	0
OTU_2988	0	7	0	0	1	0	0	0	0	0	0	0	0	0	0	0	0	0	0	0	0	0	0	0
OTU_2179	0	4	2	0	0	1	0	0	0	0	0	0	0	3	0	2	0	0	0	0	0	0	2	1
OTU_1160	0	3	0	0	0	0	0	0	0	0	0	0	0	4	1	0	0	0	0	0	0	0	0	0
OTU_4648	0	7	10	1	4	10	0	0	1	0	0	1	0	2	11	1	8	4	0	0	4	0	2	2
OTU_3020	0	22	12	0	1	5	0	1	19	0	0	0	0	12	17	1	5	2	0	2	5	0	8	4
OTU_508	0	17	20	5	10	10	0	0	0	0	0	0	0	1	4	27	17	9	0	0	0	0	0	0
OTU_275	0	35	10	6	4	8	0	0	3	0	1	0	0	12	12	48	21	13	0	0	4	0	0	14
OTU_1001	0	20	0	0	0	0	0	0	3	0	0	0	0	0	0	0	0	0	0	0	0	0	0	0
OTU_1887	0	4	0	0	0	0	0	1	1	0	0	1	0	0	0	1	2	0	0	0	0	0	0	0
OTU_2310	0	1	0	0	0	0	0	0	0	0	0	0	0	1	0	0	0	0	0	0	0	0	0	0
OTU_214	0	16	0	0	0	1	3	12	0	0	0	0	0	0	0	0	0	0	0	0	0	0	3	0
OTU_5145	0	1	0	0	0	0	0	0	0	0	0	0	0	0	0	0	0	0	0	0	0	0	0	0
OTU_530	0	17	1	0	0	0	0	0	0	0	0	0	0	7	0	0	0	0	0	0	0	0	0	0
OTU_4774	0	3	1	0	1	0	0	0	0	0	0	0	0	3	0	0	0	0	0	3	0	0	0	0
OTU_5315	0	1	0	0	0	0	0	0	0	0	0	0	0	1	0	0	0	0	0	0	0	0	0	0
OTU_119	0	29	76	1	5	10	0	1	30	0	0	0	0	41	77	23	3	12	0	1	13	0	4	0
OTU_2584	0	12	0	0	0	0	0	0	0	0	0	0	0	4	0	0	0	0	0	3	0	0	0	0
OTU_537	0	17	1	0	0	0	0	0	0	0	0	0	0	7	16	0	0	0	0	0	0	0	0	0
OTU_121	0	77	36	10	51	76	0	2	3	0	0	0	0	35	45	37	37	110	0	1	0	0	5	0
OTU_4495	0	6	22	0	0	0	0	0	3	0	0	0	0	5	7	0	0	0	0	0	0	0	0	0
OTU_600	0	18	16	0	0	2	0	0	4	0	0	0	0	11	11	1	0	2	0	0	0	0	0	0
OTU_2725	0	6	0	0	0	0	0	0	0	0	0	0	0	6	2	0	0	0	0	0	0	0	0	0
OTU_1983	0	22	19	1	1	8	0	0	14	0	4	0	0	11	26	5	1	1	0	1	10	0	3	1
OTU_5617	0	10	12	0	0	6	0	0	0	0	0	1	0	15	8	2	0	7	0	0	0	0	0	0
OTU_4562	0	9	59	6	28	42	0	0	0	0	0	0	0	3	52	20	18	39	0	0	0	0	1	0
OTU_58	0	11	0	0	24	0	4	32	1	0	11	0	3	0	0	1	0	0	79	0	0	0	0	3
OTU_1345	0	9	0	0	0	0	0	0	0	0	0	0	0	1	0	0	0	0	2	3	0	0	0	0
OTU_1720	0	6	0	0	0	0	0	0	0	0	0	0	0	4	0	0	0	0	0	1	0	0	0	0
OTU_1265	0	9	0	0	1	0	0	0	0	0	0	0	0	5	0	0	0	0	0	0	0	0	0	0
OTU_324	0	44	154	16	56	152	0	1	48	1	0	2	0	22	139	47	75	165	0	0	1	0	19	18
OTU_381	0	22	8	0	0	0	0	0	1	0	0	0	0	16	5	0	0	0	0	0	0	0	0	0
OTU_4040	0	12	6	0	2	2	0	0	0	0	0	0	0	11	5	0	0	2	0	0	0	0	0	0
OTU_446	0	19	24	0	1	0	0	1	12	0	0	0	0	8	10	0	0	0	0	9	4	0	0	0
OTU_2409	0	5	0	0	0	0	0	0	0	0	0	0	0	0	0	0	0	0	0	0	0	0	0	0
OTU_1469	0	12	0	0	0	0	0	0	0	0	0	0	0	5	0	0	0	0	0	0	0	0	0	0
OTU_4310	0	10	2	0	0	0	0	0	0	0	0	0	0	1	1	0	0	0	0	0	0	0	0	0
OTU_3706	0	4	0	0	0	0	0	0	0	0	0	0	0	1	0	0	0	0	0	0	0	0	0	0
OTU_358	0	9	6	0	2	9	0	0	3	0	0	0	0	2	10	2	0	7	0	0	0	0	0	1
OTU_1423	0	18	0	0	0	0	0	0	1	0	0	0	0	15	3	0	0	0	0	0	0	0	0	0
OTU_2094	0	4	0	0	0	0	0	0	0	0	0	0	0	7	0	0	0	0	0	2	0	0	0	0
OTU_1876	0	20	9	3	2	7	0	0	2	0	0	0	0	15	9	1	0	2	0	2	0	0	0	0
OTU_2403	0	5	0	0	0	0	0	0	0	0	0	0	0	0	0	0	0	0	0	0	0	0	0	0
OTU_1030	0	41	0	0	0	0	0	0	0	0	0	0	0	12	0	0	0	0	0	0	0	0	0	0
OTU_4323	0	13	12	0	2	23	0	0	0	0	0	0	0	1	4	0	0	5	0	0	0	0	0	2
OTU_680	0	43	95	1	1	0	0	3	11	0	0	0	0	39	78	1	1	3	1	5	0	0	0	0
OTU_4135	0	13	0	0	0	0	0	0	0	0	0	0	0	3	0	0	0	0	0	0	0	0	0	0
OTU_2533	0	1	0	0	0	0	0	0	0	0	0	0	0	0	0	0	0	0	1	0	0	0	0	0
OTU_285	0	7	10	2	30	8	0	0	0	0	0	0	0	3	10	16	13	14	0	0	0	0	0	0
OTU_1121	0	4	0	0	0	0	0	9	2	0	1	0	0	0	0	0	0	0	0	0	0	0	0	0
OTU_2364	0	2	0	0	0	0	0	0	3	0	0	0	0	0	0	0	0	0	0	0	0	0	0	0
OTU_79	0	12	64	26	43	98	0	0	19	1	0	13	0	14	54	35	15	86	0	0	15	0	25	31
OTU_1682	0	2	0	0	0	0	0	0	0	0	0	0	3	0	0	0	0	0	3	0	0	0	0	0
OTU_1141	0	10	0	0	0	0	0	0	0	0	0	0	0	0	0	0	0	0	0	0	0	0	0	0
OTU_3027	0	2	0	0	0	0	0	0	0	0	0	0	0	1	0	0	0	0	0	0	0	0	0	0
OTU_1648	0	18	0	0	0	0	2	0	0	0	0	0	0	4	0	0	0	0	0	1	0	0	0	0
OTU_3079	0	3	0	0	0	0	0	0	0	0	0	0	0	1	0	0	0	0	0	0	0	0	0	0
OTU_608	0	7	0	0	0	0	0	0	0	0	0	0	0	2	0	0	0	0	0	4	0	0	0	0
OTU_5916	0	40	0	0	0	0	0	0	0	0	0	0	0	28	2	0	0	0	0	0	0	0	0	0
OTU_632	0	9	1	1	0	2	0	0	3	0	0	0	0	0	0	1	0	0	0	0	0	0	0	5
OTU_2074	0	7	3	0	0	0	0	0	0	0	0	0	0	1	2	0	0	0	0	0	0	0	0	0
OTU_5682	0	26	0	0	0	0	0	0	0	0	0	0	0	10	0	0	0	0	0	0	0	0	0	0
OTU_6488	0	4	5	0	0	3	0	0	0	0	0	0	0	15	4	1	0	1	0	0	0	0	1	0
OTU_5317	0	1	0	0	0	0	0	0	0	0	0	0	0	0	0	0	0	0	0	0	0	0	0	0
OTU_4536	0	3	0	0	0	0	0	0	0	0	0	0	0	0	0	0	0	0	0	0	0	0	0	0
OTU_4000	0	1	0	0	0	0	0	0	0	0	0	0	0	0	0	0	0	0	0	0	0	0	0	0
OTU_813	0	12	71	7	23	51	0	0	3	0	0	0	0	4	60	19	14	25	0	0	0	0	0	3
OTU_5581	0	1	0	0	0	0	0	0	0	0	0	0	0	0	0	0	0	0	0	0	0	0	0	0
OTU_3554	0	4	0	0	0	0	0	0	0	0	0	0	0	3	1	1	0	0	0	0	0	0	0	0
OTU_798	0	10	18	2	3	33	0	3	13	0	0	2	0	5	19	13	14	25	0	12	4	0	0	2
OTU_2195	0	10	8	0	0	1	0	1	0	0	0	0	0	3	0	4	0	1	0	0	1	0	0	0
OTU_1665	0	6	1	0	0	0	0	0	0	8	0	0	0	0	0	0	0	0	0	0	0	0	0	0
OTU_3651	0	16	34	2	0	1	0	0	7	0	0	0	0	4	21	5	0	0	0	0	0	0	0	0
OTU_1259	0	4	0	0	0	0	0	0	0	0	0	0	0	0	0	0	0	0	0	1	0	0	0	0
OTU_4384	0	1	0	0	0	0	0	0	0	0	0	0	0	0	0	0	0	0	1	0	0	0	0	0
OTU_5318	0	3	0	0	0	0	0	0	0	0	0	0	0	0	0	0	0	0	0	0	0	0	0	0
OTU_253	0	14	3	0	0	0	0	67	1	0	0	0	0	0	0	0	0	0	0	1	0	0	0	0
OTU_1506	0	3	2	0	0	0	0	0	0	0	0	0	0	0	0	0	0	0	0	0	0	0	0	0
OTU_966	0	5	0	0	0	0	0	0	0	0	0	0	0	5	1	0	0	0	0	6	0	0	0	0
OTU_6212	0	1	0	0	0	0	0	0	0	0	0	0	0	0	0	0	0	0	0	0	0	0	0	0
OTU_352	0	14	5	2	9	16	0	0	2	0	0	0	0	1	19	17	6	14	0	0	0	0	0	0
OTU_2131	0	3	0	0	0	0	0	0	0	0	0	0	0	2	0	0	0	0	0	0	0	0	0	0
OTU_143	0	7	0	0	3	4	0	22	25	0	0	0	0	6	2	1	0	0	18	69	14	0	2	7
OTU_4011	0	3	0	0	0	0	0	0	0	0	0	0	0	0	0	0	0	0	0	0	0	0	0	0
OTU_154	0	4	1	6	90	7	1	8	6	0	7	12	5	4	3	3	12	1	63	40	24	0	0	5
OTU_3424	0	10	11	0	0	1	0	0	0	0	0	0	0	0	6	0	4	1	0	0	0	0	0	0
OTU_5819	0	8	0	0	0	0	0	0	0	0	0	0	0	12	0	0	0	0	1	0	0	0	0	0
OTU_538	0	15	9	2	0	0	0	0	0	0	0	0	0	16	16	0	0	0	0	0	0	0	0	0
OTU_812	0	34	0	0	0	0	0	0	0	0	0	0	0	19	0	0	0	0	0	1	0	0	0	0
OTU_4586	0	6	0	0	0	0	0	0	0	0	0	0	0	0	0	0	0	0	0	0	0	0	0	0
OTU_244	0	10	21	0	0	4	0	0	1	0	0	0	0	0	18	4	2	2	0	0	0	0	0	0
OTU_2307	0	2	0	0	0	0	0	0	0	0	0	0	0	0	0	0	0	0	0	0	0	0	0	0
OTU_252	0	2	50	23	66	233	0	0	5	0	0	1	0	0	59	44	90	273	0	0	0	0	0	11
OTU_3544	0	9	20	0	0	2	0	0	0	0	0	0	1	3	1	0	3	3	0	0	0	0	0	2
OTU_1686	0	8	0	0	0	0	0	0	0	0	0	0	0	1	0	0	0	0	0	0	0	0	0	0
OTU_4250	0	1	0	1	1	1	0	0	0	0	0	2	0	0	0	0	0	0	0	0	0	0	0	0
OTU_4163	0	13	12	0	7	1	0	0	7	0	0	0	0	13	18	2	0	0	0	2	7	0	1	0
OTU_1660	0	27	14	8	1	2	0	0	0	0	0	0	0	19	13	13	0	2	0	0	1	0	0	0
OTU_606	0	11	0	0	0	1	0	0	0	0	0	0	0	3	0	0	0	0	0	3	0	0	0	0
OTU_2604	0	3	0	0	0	0	0	0	0	0	0	0	0	1	0	0	0	0	0	0	0	0	0	0
OTU_1874	0	7	1	0	0	0	0	0	0	0	0	0	0	0	2	0	0	0	0	0	0	0	0	1
OTU_5346	0	9	10	0	0	1	0	0	1	1	0	0	2	10	5	2	0	1	0	2	2	0	0	0
OTU_5219	0	7	2	0	0	0	0	0	3	0	0	0	0	1	1	0	0	0	0	2	0	0	0	0
OTU_3458	0	21	42	2	10	4	0	0	3	0	0	0	0	16	71	6	16	28	0	0	0	0	0	0
OTU_6428	0	6	0	12	0	0	2123	1350	0	0	0	0	0	0	0	3	0	98	0	0	7	0	1	0
OTU_1793	0	7	2	1	0	0	0	0	0	0	0	0	0	5	1	1	1	0	0	1	0	0	0	0
OTU_1910	0	3	0	0	0	0	0	3	0	0	0	0	0	0	0	0	0	0	0	0	0	0	0	6
OTU_1482	0	13	512	21	30	72	0	11	881	0	14	3	0	31	808	52	39	88	1	25	36	0	43	45
OTU_830	0	1	7	0	1	0	0	1	2	0	0	0	0	0	1	0	0	1	0	0	0	0	0	0
OTU_524	0	3	12	6	2	3	0	0	2	0	0	0	0	7	11	3	2	10	0	0	9	0	0	0
OTU_1528	0	5	12	0	0	4	0	0	0	0	0	0	0	5	14	0	3	1	0	0	0	0	0	0
OTU_701	0	71	0	0	0	0	0	0	0	0	0	0	0	4	0	0	0	0	0	1	0	0	0	0
OTU_2045	0	7	21	0	1	1	0	0	0	0	0	0	0	2	23	5	2	1	0	0	0	0	0	0
OTU_1653	0	1	0	0	0	0	0	0	1	0	0	0	1	0	0	0	0	0	7	0	0	0	0	0
OTU_2085	0	1	1	0	0	0	0	0	0	0	0	0	0	1	1	0	0	0	0	0	0	0	0	0
OTU_886	0	7	0	0	0	0	0	0	0	0	0	0	0	0	3	0	0	0	0	0	0	0	0	0
OTU_4855	0	1	0	0	0	0	0	0	0	0	0	0	0	0	0	0	0	0	0	0	0	0	0	0
OTU_130	0	1	1	0	1	283	0	0	0	0	0	0	0	0	1	0	0	0	0	0	0	0	0	6
OTU_4069	0	5	2	0	0	0	0	0	0	0	0	0	0	0	2	0	0	0	0	0	0	0	0	0
OTU_4531	0	2	0	0	0	1	0	0	0	0	0	0	0	0	0	0	0	0	0	0	0	0	0	0
OTU_4799	0	1	0	0	0	0	0	0	0	0	0	0	0	0	0	0	0	0	0	0	0	0	0	0
OTU_803	0	6	0	0	8	3	0	0	0	0	0	0	0	0	1	0	1	0	0	0	0	0	0	1
OTU_46	0	5	2	3	38	101	0	2	11	1	1	9	3	3	15	1	2	43	0	25	0	1	2	11
OTU_1604	0	1	0	0	0	0	0	4	2	0	0	0	0	0	0	0	0	0	0	0	0	0	0	0
OTU_4294	0	4	1	0	0	0	0	0	0	0	0	0	0	1	1	0	0	0	0	4	0	0	0	0
OTU_2548	0	7	1	0	0	2	0	0	0	0	0	0	0	0	1	0	0	0	0	0	0	0	0	0
OTU_3145	0	5	4	0	0	1	0	0	0	0	0	0	0	2	2	0	0	0	0	0	0	0	0	1
OTU_127	0	7	7	3	5	68	0	1	1	2	0	0	0	2	10	3	10	30	0	0	8	0	2	11
OTU_520	0	4	6	9	3	1	0	0	0	0	0	0	0	0	11	35	8	3	0	0	0	0	0	0
OTU_4461	0	4	0	0	0	0	0	0	1	0	0	0	0	0	1	0	0	0	0	0	0	0	0	0
OTU_2032	0	3	0	1	0	1	0	0	0	0	0	0	0	4	3	1	0	0	0	0	0	0	0	0
OTU_592	0	10	7	0	2	2	0	0	2	0	0	0	0	3	10	0	0	0	0	0	0	0	0	0
OTU_3827	0	4	0	0	0	0	0	0	0	0	0	0	0	0	0	0	0	0	0	0	0	0	0	0
OTU_892	0	1	4	10	3	0	0	0	3	3	0	0	0	0	2	6	0	0	0	0	8	0	2	0
OTU_2876	0	8	11	0	1	5	0	0	0	0	0	0	0	6	18	3	5	0	0	0	0	0	0	0
OTU_1401	0	4	0	0	0	0	0	1	0	0	0	0	0	0	0	0	0	0	0	9	0	0	0	0
OTU_3530	0	1	0	0	0	0	0	0	0	0	0	0	0	0	0	0	0	0	0	0	0	0	0	0
OTU_3108	0	7	0	0	0	0	0	0	0	0	0	0	0	4	0	0	0	0	0	0	0	0	0	0
OTU_6253	0	10	20	0	0	1	0	0	1	0	0	0	0	9	8	0	0	1	0	2	0	0	0	0
OTU_4314	0	9	1	0	0	0	0	0	0	0	0	0	0	0	1	2	0	0	0	0	0	0	0	0
OTU_1238	0	12	1	0	0	0	0	0	0	0	0	0	0	1	0	0	0	0	0	0	0	0	0	0
OTU_4036	0	6	2	0	0	0	0	0	0	0	0	0	0	1	0	0	0	0	0	0	0	0	0	0
OTU_4802	0	2	0	0	0	0	0	0	0	0	0	0	0	0	0	0	0	0	0	0	0	0	0	0
OTU_2622	0	2	1	0	0	0	0	0	0	0	0	0	0	0	2	0	0	0	0	0	0	0	0	0
OTU_5053	0	29	3	0	0	0	0	0	0	0	0	0	0	15	3	2	0	1	0	4	0	0	0	0
OTU_6594	0	14	18	0	1	3	0	0	15	0	0	0	0	23	24	0	0	1	0	2	1	0	0	0
OTU_4037	0	3	0	0	0	0	0	0	0	0	0	0	0	0	0	0	0	0	0	0	0	0	0	0
OTU_2726	0	2	1	0	0	0	0	0	0	0	0	0	0	3	10	0	0	3	0	0	0	0	0	4
OTU_4798	0	4	0	0	0	0	0	0	0	0	0	0	0	0	0	0	0	0	0	0	0	0	0	0
OTU_2023	0	1	6	0	0	0	0	0	0	0	0	0	0	0	4	0	0	0	0	1	0	0	0	0
OTU_6243	0	3	2	0	0	0	0	0	0	0	0	0	0	2	0	0	0	0	0	2	0	0	0	0
OTU_181	0	2	4	5	6	39	0	4	42	1	8	31	0	1	4	9	2	3	0	6	45	0	44	56
OTU_987	0	4	37	3	4	21	0	0	7	0	0	0	0	3	51	12	3	3	0	0	0	0	1	0
OTU_618	0	4	9	0	0	0	0	0	0	0	0	0	0	1	0	0	0	0	0	2	0	0	0	0
OTU_4567	0	11	0	0	0	1	0	0	0	0	0	0	0	5	1	0	0	0	0	0	0	0	0	0
OTU_5498	0	8	9	0	0	0	0	0	0	0	0	0	0	3	2	0	0	0	0	0	0	0	0	0
OTU_259	0	17	23	1	0	2	0	0	3	0	0	0	0	5	25	1	0	0	0	0	0	0	0	0
OTU_3569	0	7	3	0	1	0	0	0	1	0	0	0	0	1	1	3	0	0	0	0	0	0	0	0
OTU_6087	0	1	0	0	0	0	0	0	0	0	0	0	0	0	0	0	0	0	0	0	0	0	0	0
OTU_5822	0	1	0	0	0	0	0	0	0	0	0	0	0	0	0	0	0	0	0	0	0	0	0	0
OTU_1258	0	9	0	0	0	0	0	0	0	0	0	0	0	0	0	0	0	0	0	0	0	0	0	0
OTU_6092	0	1	0	0	1	0	0	0	0	0	0	0	3	0	0	1	0	0	17	2	0	0	0	5
OTU_5208	0	10	16	0	3	1	0	0	0	0	0	0	1	7	2	0	0	1	0	0	0	0	0	0
OTU_6236	0	1	0	0	0	0	0	0	0	0	0	0	0	0	0	0	0	0	0	0	0	0	0	0
OTU_6597	0	6	2	0	0	0	0	0	0	0	0	0	0	2	0	1	0	3	0	0	0	0	0	0
OTU_4596	0	2	0	0	0	0	0	0	0	0	0	0	0	0	0	0	0	0	0	0	0	0	0	0
OTU_4813	0	7	28	0	2	6	0	0	1	0	0	0	0	9	19	8	0	3	0	0	0	0	0	0
OTU_662	0	4	0	0	0	1	0	4	41	0	0	0	0	0	5	0	0	0	5	37	39	0	0	0
OTU_1526	0	44	0	0	0	0	0	4	0	0	0	0	0	46	0	0	1	0	0	1	0	0	0	4
OTU_4375	0	2	0	0	0	0	0	0	0	0	0	0	0	1	0	0	0	0	0	0	0	0	0	0
OTU_2352	0	1	0	0	0	0	4	0	0	0	0	0	8	0	0	0	0	0	4	0	0	0	0	0
OTU_344	0	8	76	4	3	14	0	0	0	0	0	0	1	10	94	28	0	0	0	0	3	0	0	0
OTU_3409	0	6	4	2	0	5	0	0	0	0	0	1	0	3	2	2	0	1	0	0	0	0	0	1
OTU_1135	0	4	0	0	0	0	0	0	1	0	0	0	0	0	0	0	0	0	0	0	0	0	3	5
OTU_3019	0	4	0	0	0	0	0	0	0	0	0	0	0	0	0	0	0	0	0	1	0	0	0	0
OTU_2168	0	4	3	0	0	0	0	0	0	0	0	0	0	3	1	0	1	0	0	1	0	0	0	7
OTU_6090	0	1	0	0	0	0	0	0	0	0	0	0	0	0	0	0	0	0	0	0	0	0	0	0
OTU_5314	0	3	0	0	0	0	0	0	0	0	0	0	0	8	0	0	0	0	0	2	0	0	0	0
OTU_1182	0	5	0	0	0	0	0	0	0	0	0	0	0	1	2	0	0	0	0	0	0	0	0	0
OTU_1104	0	8	14	0	2	1	0	0	1	0	0	0	0	2	8	0	3	2	0	0	2	0	0	0
OTU_914	0	1	10	1	5	5	0	0	2	0	0	0	0	0	9	5	0	8	0	0	0	0	0	0
OTU_5278	0	3	0	0	0	0	0	0	0	0	0	0	0	0	0	0	0	0	0	0	0	0	0	0
OTU_898	0	11	9	3	0	1	0	45	24	0	2	0	0	1	1	8	2	0	0	48	56	0	0	4
OTU_3107	0	2	0	0	0	0	0	0	0	0	0	0	0	0	0	0	0	0	0	0	0	0	0	0
OTU_1426	0	5	0	0	0	0	0	0	0	0	0	0	0	0	0	0	0	0	0	0	0	0	0	0
OTU_2598	0	2	0	0	0	0	0	0	0	0	0	0	0	0	0	0	0	0	0	0	0	0	0	0
OTU_5535	0	21	4	0	0	0	0	0	0	0	0	0	0	8	1	0	0	0	0	4	0	0	0	0
OTU_470	0	1	1	0	0	0	0	0	1	0	0	0	0	0	2	0	0	0	0	14	1	0	0	0
OTU_905	0	6	8	1	2	2	0	0	0	0	0	0	0	13	13	1	1	1	0	0	0	0	0	0
OTU_1119	0	4	6	0	0	0	0	0	1	0	0	0	0	1	8	0	0	0	0	0	0	0	0	0
OTU_173	0	11	24	5	13	26	0	0	1	0	0	0	0	18	36	26	16	12	0	0	2	0	2	0
OTU_5964	0	6	3	0	0	0	0	0	0	0	0	0	0	5	3	2	0	1	0	0	0	0	0	0
OTU_1544	0	2	0	0	0	1	0	1	0	0	0	0	0	2	0	1	0	0	0	0	0	0	0	0
OTU_2825	0	4	0	0	0	0	0	0	0	0	0	0	0	1	0	0	0	0	0	0	0	0	0	0
OTU_2846	0	1	1	0	0	0	0	0	0	0	0	0	0	2	0	0	0	0	0	0	0	0	0	0
OTU_1626	0	1	1	0	0	0	0	0	0	0	0	0	0	0	1	1	0	0	0	6	0	0	0	0
OTU_1023	0	1	0	1	0	0	0	0	0	0	0	0	0	5	10	0	0	0	0	0	0	0	0	0
OTU_5458	0	1	0	0	0	0	0	0	0	0	0	0	0	0	0	0	0	0	0	0	0	0	0	0
OTU_2597	0	1	0	0	0	0	0	0	0	0	0	0	0	0	0	0	0	0	0	0	0	0	0	0
OTU_780	0	11	35	0	1	3	0	0	0	0	0	0	0	4	16	2	0	0	0	1	2	0	0	0
OTU_424	0	9	24	11	3	1	0	2	1	0	0	0	0	2	25	19	1	0	0	0	0	0	0	0
OTU_3525	0	1	0	0	0	0	0	0	1	2	0	0	0	0	0	0	0	0	0	3	3	0	0	0
OTU_481	0	2	3	0	0	0	0	1	1	0	0	0	0	14	0	1	0	0	0	7	0	0	0	0
OTU_3816	0	5	0	0	0	0	2	0	1	0	0	0	2	1	1	1	0	0	0	0	0	0	0	2
OTU_3176	0	2	0	0	0	0	0	0	0	0	0	0	0	2	0	0	0	0	0	0	0	0	0	0
OTU_6489	0	5	0	0	0	0	0	0	2	0	0	0	0	1	0	0	0	0	0	0	0	0	0	0
OTU_5595	0	5	0	0	0	2	0	0	0	0	0	0	0	3	0	0	0	0	0	0	0	0	0	0
OTU_2092	0	1	0	0	0	0	0	0	0	0	0	0	0	0	0	0	0	0	0	0	0	0	0	0
OTU_4853	0	1	0	0	0	0	0	0	0	0	0	0	0	0	0	0	0	0	0	0	0	0	0	0
OTU_1551	0	3	0	0	0	4	0	0	0	0	0	0	0	0	0	0	0	2	0	0	0	0	0	0
OTU_4765	0	2	0	0	0	0	0	0	0	0	0	0	0	0	0	0	0	0	0	0	0	0	0	0
OTU_438	0	2	0	0	8	1	0	0	4	0	0	0	0	3	6	0	1	7	0	0	0	0	3	16
OTU_610	0	5	2	0	0	2	0	0	5	0	0	0	0	4	7	0	0	0	0	0	0	0	5	0
OTU_2279	0	3	0	0	0	0	0	0	0	0	0	0	0	2	0	0	0	0	0	0	0	0	0	0
OTU_2830	0	3	1	0	0	0	0	0	0	0	0	0	0	3	0	0	0	0	0	0	0	0	0	0
OTU_3649	0	4	9	0	1	7	0	0	0	0	0	0	0	2	14	2	2	0	0	0	0	0	0	0
OTU_1930	0	3	2	0	0	0	0	0	0	0	0	0	0	0	4	0	0	0	0	0	0	0	0	0
OTU_1002	0	2	0	0	0	0	0	0	0	0	0	0	0	4	0	0	0	0	0	0	0	0	0	0
OTU_230	0	2	16	1	9	3	0	0	41	0	5	1	0	0	12	24	3	5	0	1	62	0	21	30
OTU_1714	0	4	8	0	0	1	0	0	0	0	0	0	0	6	10	1	6	2	0	0	0	0	0	0
OTU_5873	0	2	0	0	0	0	0	0	0	0	0	0	0	0	0	0	3	0	0	0	0	0	0	0
OTU_2616	0	3	0	0	0	0	0	37	0	0	0	0	0	0	0	0	0	0	13	45	0	0	0	0
OTU_5717	0	1	0	0	0	0	0	0	0	0	0	0	0	0	0	0	0	0	0	0	0	0	0	0
OTU_2166	0	1	0	0	0	0	0	0	0	0	0	0	0	0	0	0	0	0	0	0	3	0	5	1
OTU_4892	0	1	11	0	0	0	0	0	0	0	0	0	0	8	5	0	0	0	0	0	0	0	0	0
OTU_4690	0	1	0	0	0	0	0	0	0	0	0	0	0	1	2	0	0	0	0	0	0	0	0	0
OTU_512	0	3	28	4	1	2	0	0	0	0	0	0	0	1	44	25	0	0	0	0	0	0	0	0
OTU_2504	0	1	7	0	0	0	0	0	5	0	0	0	0	3	2	0	0	0	0	0	1	0	0	1
OTU_4282	0	5	0	0	0	0	0	0	0	0	0	0	0	1	0	0	0	0	0	4	0	0	0	0
OTU_3966	0	1	1	0	0	0	0	3	0	0	0	0	0	0	0	0	0	0	0	0	0	0	0	0
OTU_2843	0	1	0	0	0	0	0	0	0	0	0	0	0	0	0	0	0	0	0	0	0	0	0	0
OTU_116	0	8	7	4	15	20	7	3	0	7	0	0	12	5	2	22	3	11	106	10	5	0	3	0
OTU_1759	0	2	0	1	3	1	0	0	0	0	0	0	0	1	0	0	0	1	0	0	0	0	0	0
OTU_90	0	10	28	6	7	71	0	0	10	0	0	0	0	7	14	3	2	38	0	0	18	0	0	1
OTU_5244	0	1	0	0	0	0	0	0	0	0	0	0	0	1	0	0	0	0	0	0	0	0	0	0
OTU_2848	0	1	0	0	0	0	0	0	0	0	0	0	0	0	0	0	0	0	0	0	0	0	0	0
OTU_849	0	3	5	0	1	4	0	1	6	0	0	0	0	9	7	2	0	1	0	2	0	0	1	0
OTU_4035	0	2	0	0	0	0	0	0	0	0	0	0	0	0	0	0	0	0	0	0	0	0	0	0
OTU_1666	0	5	2	0	0	0	0	0	0	0	0	0	0	0	0	0	0	0	0	0	0	0	0	0
OTU_1717	0	4	0	0	0	0	0	0	0	0	0	0	0	0	0	0	0	0	0	0	0	0	0	0
OTU_273	0	19	10	5	7	4	5	0	0	0	0	0	10	20	23	8	11	4	3	0	0	0	0	1
OTU_1410	0	3	0	0	0	0	0	0	4	0	0	0	0	1	0	0	0	0	0	0	0	0	0	0
OTU_5848	0	1	0	0	0	0	0	0	0	0	0	0	0	1	0	1	0	0	0	0	0	0	0	0
OTU_2514	0	2	1	0	0	0	0	0	0	0	0	0	0	0	0	0	0	0	0	0	9	0	0	0
OTU_2196	0	2	1	0	0	0	0	0	0	0	0	0	0	3	1	1	0	0	0	0	0	0	0	0
OTU_107	0	32	22	0	6	2	0	0	8	0	0	0	0	9	36	0	1	15	0	0	0	0	0	2
OTU_263	0	4	15	4	3	5	0	0	0	1	0	0	0	2	13	29	8	6	0	1	2	0	0	0
OTU_5491	0	1	0	0	0	1	0	0	0	0	0	0	0	1	2	2	1	2	0	0	0	0	0	1
OTU_138	0	2	0	0	0	0	0	3	20	0	0	0	0	0	3	0	0	0	0	43	10	0	0	0
OTU_2772	0	1	0	0	0	0	0	1	0	0	0	0	0	0	0	0	0	0	5	5	0	0	0	0
OTU_2349	0	1	0	1	0	0	1	0	0	0	0	0	0	0	0	0	1	0	0	0	0	0	0	0
OTU_2544	0	3	0	0	0	0	0	0	0	0	0	0	0	0	0	0	0	0	0	0	0	0	0	0
OTU_912	0	6	0	0	0	0	0	0	0	0	0	0	0	0	0	0	0	0	0	0	0	0	0	0
OTU_5154	0	5	0	0	0	0	0	0	0	0	0	0	0	2	0	0	0	0	0	0	0	0	0	0
OTU_2356	0	2	0	0	0	0	0	0	0	0	0	0	2	0	0	0	1	0	0	0	0	0	0	0
OTU_6326	0	9	10	1	1	8	0	0	0	0	0	0	0	22	6	3	0	3	0	0	0	0	0	0
OTU_4768	0	2	1	1	0	0	0	0	0	0	0	0	0	0	0	0	1	0	0	1	0	0	0	1
OTU_4188	0	1	0	0	0	0	0	0	0	0	0	0	0	1	0	0	0	0	0	0	0	0	0	0
OTU_3828	0	1	0	0	0	0	0	0	0	0	0	0	0	0	0	0	0	0	0	0	0	0	0	0
OTU_3594	0	3	1	0	0	0	0	1	2	0	0	0	0	0	1	0	0	0	0	0	0	0	0	0
OTU_5096	0	1	0	0	0	0	0	0	0	0	0	0	0	2	1	0	0	2	0	0	0	0	0	0
OTU_2067	0	1	0	0	0	0	0	0	0	0	0	0	0	4	0	0	0	0	0	0	0	0	0	0
OTU_5627	0	9	0	0	0	0	0	1	0	0	0	0	0	8	2	0	0	0	0	2	1	0	0	1
OTU_2845	0	4	0	0	0	0	0	0	0	0	0	0	0	1	0	0	0	0	0	0	0	0	0	0
OTU_4473	0	2	1	0	0	0	0	0	1	0	0	0	0	1	1	0	0	0	0	0	0	0	0	0
OTU_6347	0	1	0	0	0	0	0	0	0	0	0	0	0	0	0	0	0	0	0	0	0	0	0	0
OTU_2844	0	2	0	0	0	0	0	0	0	0	0	0	0	0	0	0	0	0	2	0	0	0	0	0
OTU_1299	0	1	1	0	0	0	0	0	0	0	0	0	0	0	0	3	0	0	0	0	0	0	0	0
OTU_518	0	26	0	0	0	0	0	0	0	0	0	0	0	9	0	0	0	0	0	0	0	0	0	0
OTU_2309	0	3	0	0	0	0	0	0	0	0	0	0	0	0	0	0	0	0	0	0	0	0	0	0
OTU_2042	0	8	0	0	0	0	0	0	0	0	0	0	0	0	0	0	0	0	0	0	0	0	0	0
OTU_999	0	3	0	0	0	0	0	14	0	0	0	0	0	0	0	0	0	0	0	31	0	0	0	0
OTU_5441	0	1	0	0	0	0	0	0	0	0	0	0	0	1	0	0	0	0	0	0	0	0	0	0
OTU_5525	0	14	68	1	4	7	0	0	57	0	0	0	2	29	91	8	10	10	0	1	2	0	9	7
OTU_908	0	7	13	7	1	10	0	1	4	0	0	1	0	2	15	11	10	9	0	7	10	0	0	0
OTU_383	0	14	8	0	0	92	0	0	0	0	0	0	1	4	4	0	1	2	0	5	5	0	0	0
OTU_3279	0	1	0	0	0	0	0	0	0	0	0	0	0	0	0	0	0	0	0	0	0	0	0	0
OTU_2184	0	1	0	0	0	0	0	0	0	0	0	0	0	0	0	0	0	0	0	0	0	0	0	3
OTU_1806	0	1	0	0	0	0	0	0	0	0	0	0	0	5	0	0	0	0	0	0	0	0	0	0
OTU_3346	0	2	5	0	0	0	0	0	0	0	0	0	0	1	4	0	0	0	0	0	1	0	0	0
OTU_752	0	2	0	0	0	0	0	5	0	0	0	0	1	2	0	0	0	0	0	0	0	0	0	0
OTU_3633	0	2	4	1	1	6	0	0	1	0	0	0	0	0	15	2	1	19	0	0	0	0	0	0
OTU_4861	0	1	0	0	0	0	0	0	0	0	0	0	0	0	0	0	0	0	0	0	0	0	0	0
OTU_4189	0	6	1	0	0	1	0	0	0	0	0	0	0	6	1	0	0	3	0	0	0	0	0	0
OTU_4991	0	11	1	1	3	2	0	0	0	0	0	0	0	6	4	0	1	2	0	0	0	0	0	0
OTU_2014	0	2	5	0	1	3	0	0	0	0	0	0	0	5	7	0	0	0	0	0	4	0	0	1
OTU_939	0	2	0	0	0	0	0	1	8	0	0	0	0	0	6	0	0	0	0	11	33	0	0	0
OTU_2408	0	1	1	0	0	2	0	3	0	0	0	0	0	0	0	0	0	0	0	0	0	0	0	0
OTU_1275	0	1	0	0	0	0	0	0	0	0	0	0	5	0	0	0	0	0	0	0	0	0	0	0
OTU_452	0	3	7	4	3	1	0	0	0	0	0	0	0	0	4	10	8	4	0	0	0	0	0	0
OTU_5395	0	3	0	0	0	0	0	0	0	0	0	0	0	0	0	0	0	0	0	0	0	0	0	0
OTU_6002	0	1	0	0	0	0	0	0	0	0	0	0	0	0	1	0	0	1	0	0	0	0	0	0
OTU_2194	0	1	0	0	0	0	0	0	0	0	0	0	0	0	0	0	0	0	0	0	0	0	0	0
OTU_2546	0	1	0	0	0	0	0	0	0	0	0	0	0	0	0	0	0	0	0	0	0	0	0	0
OTU_1871	0	1	1	0	0	0	0	0	0	0	0	0	0	1	1	0	0	2	0	2	0	0	0	0
OTU_5143	0	1	0	0	0	0	0	0	0	0	0	0	0	0	0	0	0	0	0	0	0	0	0	0
OTU_5492	0	3	0	0	0	0	0	0	0	0	0	0	0	5	0	0	0	0	0	3	0	0	0	0
OTU_2599	0	2	0	0	0	0	0	0	0	0	0	0	0	0	1	0	0	0	0	0	0	0	0	0
OTU_6462	0	1	0	0	0	0	0	0	0	0	0	0	0	0	0	0	0	0	0	0	0	0	0	0
OTU_2713	0	2	0	0	0	0	0	0	0	0	0	0	0	0	0	0	0	0	0	0	4	0	0	0
OTU_3990	0	1	0	0	0	0	0	0	0	0	0	0	0	1	0	0	0	0	0	0	0	0	0	0
OTU_2631	0	3	0	0	0	0	0	0	0	0	0	0	0	1	0	0	0	0	0	0	0	0	0	0
OTU_4099	0	3	10	1	2	1	0	0	3	0	0	0	0	9	18	2	0	1	0	2	1	0	1	0
OTU_5983	0	4	0	3	5	0	2	1	4	0	0	0	0	1	0	0	0	0	0	4	2	0	0	0
OTU_1575	0	1	13	2	2	14	0	0	0	0	0	0	0	2	37	2	3	19	0	3	0	0	0	0
OTU_4804	0	3	0	0	0	0	0	0	0	0	0	0	0	0	0	0	0	0	0	0	0	0	0	0
OTU_5397	0	1	0	0	0	0	0	0	0	0	0	0	0	0	0	0	0	0	0	0	0	0	0	0
OTU_948	0	3	12	1	0	1	0	0	1	0	0	0	0	1	3	3	0	0	0	0	0	0	0	0
OTU_3132	0	11	3	1	3	3	0	0	3	0	0	0	0	1	8	1	0	5	0	0	0	0	2	1
OTU_3989	0	2	1	0	0	0	0	0	0	0	0	0	0	3	5	0	0	0	0	0	0	0	0	0
OTU_4574	0	2	0	0	0	0	0	0	0	0	0	0	0	0	0	0	0	0	3	0	1	0	0	0
OTU_3619	0	2	0	0	0	0	0	0	0	0	0	0	0	2	0	0	0	0	0	0	0	0	0	0
OTU_3281	0	3	1	0	0	0	0	0	0	0	0	0	0	0	1	0	0	0	0	0	0	0	0	1
OTU_4393	0	1	0	0	0	0	0	0	0	0	0	0	0	0	0	0	0	0	0	4	0	0	0	0
OTU_1566	0	2	0	0	0	0	0	0	1	0	0	0	0	0	0	0	1	4	0	0	4	0	0	2
OTU_2191	0	1	0	0	0	0	0	0	0	0	0	0	0	0	0	0	0	0	0	0	0	0	0	0
OTU_3565	0	1	0	0	0	0	0	2	0	0	0	0	0	0	0	0	0	0	0	0	0	0	0	0
OTU_5142	0	2	0	0	0	0	0	0	0	0	0	0	0	0	0	0	0	0	0	0	0	0	0	2
OTU_2871	0	3	0	0	0	0	0	0	0	0	0	0	0	4	0	0	0	0	0	0	0	0	0	0
OTU_913	0	2	1	0	0	0	0	0	0	0	0	0	0	6	1	1	0	0	0	3	0	0	0	0
OTU_737	0	2	2	0	0	0	0	0	8	0	0	0	0	0	3	0	0	0	0	0	0	0	0	0
OTU_463	0	1	0	0	0	0	0	0	0	0	0	0	0	12	0	0	0	0	0	0	0	0	0	0
OTU_6596	0	10	51	2	11	10	0	1	58	0	1	0	2	19	67	9	4	17	0	4	5	0	14	4
OTU_2786	0	3	2	0	0	0	0	0	0	0	0	0	0	2	1	0	1	0	0	0	0	0	0	0
OTU_3028	0	5	0	0	0	0	0	0	0	0	0	0	0	0	0	0	0	0	0	0	0	0	0	0
OTU_3514	0	2	0	0	0	0	0	0	0	0	0	0	0	0	1	0	0	0	0	0	0	0	0	0
OTU_5584	0	5	5	0	1	0	0	0	3	0	0	0	0	20	3	0	0	0	0	5	1	0	0	0
OTU_2329	0	4	2	3	8	7	0	0	0	0	0	0	0	2	5	15	7	9	0	0	0	0	0	0
OTU_5716	0	1	0	0	0	0	0	0	0	0	0	0	0	0	0	0	0	0	0	0	0	0	0	0
OTU_2337	0	1	1	0	0	0	0	0	0	0	0	0	0	2	5	0	0	1	0	0	0	0	0	0
OTU_888	0	4	1	0	0	0	0	5	1	0	0	0	0	0	0	0	0	0	0	0	0	0	0	1
OTU_4316	0	1	0	0	0	0	0	0	0	0	0	0	0	0	0	0	0	0	0	0	0	0	0	0
OTU_3812	0	3	0	0	0	0	0	0	0	0	0	0	0	3	0	0	0	0	0	0	0	0	0	4
OTU_1888	0	1	0	1	5	2	0	0	0	0	0	0	0	1	0	7	6	2	0	0	0	0	0	1
OTU_1236	0	4	0	0	0	0	0	0	0	0	0	0	0	2	0	0	0	0	0	0	0	0	0	0
OTU_4862	0	2	0	0	0	0	0	0	0	0	0	0	0	0	0	1	1	1	0	1	0	0	0	0
OTU_3700	0	2	0	0	0	0	0	0	0	0	0	0	0	2	1	1	0	0	0	0	0	0	0	0
OTU_690	0	4	20	1	1	16	0	0	6	0	0	0	0	1	20	0	2	22	0	0	1	0	0	2
OTU_2289	0	4	0	0	0	0	0	0	0	0	0	0	0	3	0	0	0	0	0	0	0	0	0	0
OTU_3502	0	1	0	0	0	0	0	0	0	0	0	0	0	0	0	0	0	0	0	0	0	0	0	0
OTU_122	0	1	0	0	0	0	0	12	53	4	2	9	0	2	0	0	0	0	0	20	39	0	27	19
OTU_5050	0	1	0	20	5	2	0	1	0	1	0	1	0	0	0	1	4	2	1	2	0	0	0	0
OTU_3980	0	2	15	0	0	0	0	0	0	0	0	0	0	1	8	0	0	0	0	0	0	0	0	0
OTU_2311	0	1	0	0	0	0	0	0	0	0	0	0	0	0	0	0	0	0	0	0	0	0	0	0
OTU_267	0	1	20	0	2	0	0	13	38	0	0	0	0	4	19	0	0	0	0	26	30	0	0	0
OTU_2632	0	1	0	0	0	0	0	0	0	0	0	0	0	0	0	0	0	0	0	0	0	0	0	0
OTU_3757	0	1	0	0	0	0	0	0	0	0	0	0	0	0	4	0	0	0	0	0	0	0	0	0
OTU_328	0	1	0	0	3	6	0	0	0	0	0	0	0	0	0	4	3	23	0	0	0	0	0	0
OTU_2811	0	2	0	0	0	0	0	0	0	0	0	0	0	2	0	0	0	0	0	0	0	0	0	0
OTU_3556	0	4	2	0	0	0	0	0	1	0	0	0	0	1	1	0	0	0	0	0	0	0	0	0
OTU_2832	0	2	3	0	0	0	0	0	0	0	0	0	0	3	3	0	0	0	0	0	0	0	0	0
OTU_329	0	2	3	0	0	1	0	0	0	0	0	0	0	1	29	0	0	1	0	0	0	0	0	0
OTU_447	0	12	4	2	2	1	0	0	10	0	0	0	0	6	2	11	1	7	0	0	0	0	0	0
OTU_1625	0	3	0	0	0	0	0	0	0	0	0	0	0	5	0	0	0	0	0	0	0	0	0	0
OTU_2192	0	2	0	0	0	0	0	0	0	0	0	0	0	0	0	0	0	0	0	2	0	0	0	0
OTU_6173	0	9	8	0	0	0	0	0	4	0	0	0	0	8	0	0	0	1	1	3	0	0	0	1
OTU_3109	0	1	0	0	0	0	0	0	0	0	0	0	0	0	0	0	0	0	0	0	0	0	0	0
OTU_6500	0	7	6	1	1	1	0	0	0	0	0	0	0	0	4	1	1	1	0	0	2	0	0	1
OTU_1758	0	4	5	0	0	0	0	0	0	0	0	0	0	0	0	0	0	0	5	0	0	0	0	0
OTU_4630	0	3	1	0	0	0	0	0	0	0	0	0	0	0	0	0	0	0	0	0	0	0	0	0
OTU_5703	0	2	10	0	0	0	0	0	0	0	0	0	0	0	8	0	0	0	0	0	0	0	0	0
OTU_5147	0	1	0	0	0	0	0	0	0	0	0	0	0	0	0	0	0	0	0	0	0	0	0	0
OTU_4559	0	1	0	0	1	0	0	0	0	0	0	0	0	3	0	1	0	0	0	0	1	0	0	0
OTU_4238	0	1	2	0	1	4	0	0	0	0	0	0	0	0	0	0	2	3	0	0	0	0	0	0
OTU_1598	0	8	4	0	0	0	0	0	1	0	0	0	0	5	8	1	0	0	0	0	0	0	0	0
OTU_4794	0	1	0	0	0	0	0	0	0	0	0	0	0	0	0	0	0	0	0	0	0	0	0	0
OTU_3542	0	1	0	0	0	0	0	0	0	0	0	0	0	0	0	0	0	0	0	0	0	0	0	0
OTU_1254	0	2	1	0	0	0	0	5	2	0	0	0	0	1	0	0	0	0	2	1	0	6	0	0
OTU_4775	0	1	0	0	0	0	0	0	0	0	0	0	0	0	0	0	0	0	0	0	0	0	0	0
OTU_2633	0	1	0	0	0	0	0	0	0	0	0	0	0	0	0	0	0	0	0	0	0	0	0	0
OTU_4638	0	1	0	0	0	0	0	0	0	0	0	0	0	1	0	0	0	0	0	0	0	0	0	0
OTU_1404	0	7	0	0	0	3	0	1	0	0	0	0	0	2	0	0	0	0	0	1	0	0	0	0
OTU_6613	0	4	8	0	0	2	0	0	1	0	0	0	0	13	7	0	0	0	0	0	1	0	0	0
OTU_5125	0	1	0	0	0	0	0	2	0	0	0	0	0	0	0	0	0	0	0	16	0	0	0	0
OTU_5815	0	1	10	0	0	2	0	0	0	0	0	0	0	5	9	2	0	0	0	0	0	0	0	0
OTU_5201	0	2	0	0	0	1	0	0	0	0	0	0	0	4	1	0	0	0	0	0	0	0	0	0
OTU_4624	0	1	0	0	0	0	0	0	0	0	0	0	0	0	0	0	0	0	0	0	0	0	0	0
OTU_525	0	1	0	0	0	3	3	29	3	0	0	0	0	0	0	0	0	0	11	45	0	0	0	0
OTU_1532	0	2	0	0	1	2	0	0	0	0	0	0	0	0	1	2	0	1	1	1	0	0	0	4
OTU_5443	0	1	2	0	0	0	0	0	1	0	0	0	0	0	1	1	0	0	0	0	0	0	0	0
OTU_2308	0	1	0	0	0	0	0	0	0	0	0	0	0	0	0	0	0	0	0	0	0	0	0	0
OTU_2053	0	1	1	0	0	3	1	0	0	0	0	0	5	0	0	0	0	0	0	0	3	0	0	0
OTU_4951	0	1	1	0	0	0	0	0	0	0	0	0	0	1	2	0	0	0	0	0	0	0	0	0
OTU_3524	0	1	0	0	0	0	0	0	0	0	2	0	0	1	0	0	0	0	0	0	1	0	0	0
OTU_1375	0	1	2	0	0	0	0	0	3	0	0	0	0	0	0	0	0	0	0	0	0	0	0	0
OTU_5692	0	2	4	0	0	4	0	0	1	0	0	0	0	2	7	0	3	2	0	0	4	0	0	0
OTU_4859	0	2	0	0	0	0	0	0	0	0	0	0	0	0	0	0	0	0	0	0	0	0	0	0
OTU_3082	0	2	0	0	0	0	0	0	0	0	0	0	0	0	0	0	0	0	0	0	0	0	0	0
OTU_5398	0	1	0	0	0	0	0	0	0	0	0	0	0	0	0	0	0	0	0	0	0	0	0	0
OTU_6068	0	1	0	0	0	0	0	0	2	0	0	0	0	0	0	0	0	0	0	5	2	0	0	0
OTU_5840	0	1	0	0	0	0	0	0	0	0	0	0	0	0	0	0	0	0	0	0	0	0	0	0
OTU_6637	0	1	0	16	0	0	1	1	11	38	15	1	0	0	0	3	0	0	0	34	40	0	16	4
OTU_1240	0	5	0	0	0	0	0	0	0	0	0	0	0	3	0	0	0	0	2	0	0	0	0	1
OTU_5988	0	1	0	0	0	0	0	0	0	0	0	0	0	0	0	0	0	0	0	0	0	0	0	0
OTU_6052	0	2	0	0	0	0	0	0	0	0	0	0	0	0	5	1	0	0	0	0	0	0	0	0
OTU_648	0	1	10	0	0	0	0	0	0	0	0	0	0	1	0	0	0	0	0	3	0	0	0	0
OTU_390	0	2	0	0	1	1	0	0	0	0	0	0	0	1	0	3	1	8	0	1	0	0	0	2
OTU_2724	0	1	0	0	0	0	0	0	0	0	0	0	0	2	0	0	0	0	0	0	0	0	0	0
OTU_971	0	1	0	0	0	0	0	9	0	0	0	0	0	1	0	0	0	0	0	0	0	0	0	0
OTU_650	0	14	1	0	0	0	0	0	0	0	0	0	0	0	0	0	0	0	0	0	0	0	0	0
OTU_3236	0	1	0	0	0	0	0	0	0	0	0	0	0	0	0	0	0	0	0	0	0	0	0	0
OTU_3549	0	2	0	0	0	0	0	0	0	0	0	0	0	0	1	0	0	0	0	0	0	0	0	0
OTU_4535	0	1	0	0	0	0	0	0	0	0	0	0	0	0	0	0	0	0	0	0	0	0	0	0
OTU_2569	0	1	0	0	0	0	0	0	0	0	0	0	0	0	0	0	1	3	0	0	0	0	0	0
OTU_4668	0	3	1	0	0	0	0	0	0	0	0	0	1	2	0	0	0	0	1	0	0	0	0	0
OTU_2278	0	3	2	0	0	0	0	0	0	0	0	0	0	2	15	0	0	0	0	0	0	0	0	0
OTU_1789	0	2	0	0	0	0	0	0	0	0	0	0	0	0	0	0	0	0	3	0	0	0	0	1
OTU_509	0	1	0	0	0	0	0	7	10	0	0	1	0	1	0	0	1	0	0	20	9	0	5	1
OTU_811	0	3	11	6	7	9	0	0	0	0	0	0	0	1	32	62	7	1	0	0	0	0	0	4
OTU_4317	0	1	0	0	0	0	0	0	0	0	0	0	0	0	0	0	0	0	0	0	0	0	0	0
OTU_4938	0	2	5	0	4	4	0	0	4	0	0	0	0	3	5	3	0	9	0	0	0	0	1	1
OTU_3522	0	2	0	0	0	0	0	1	1	0	0	0	0	13	0	0	0	0	0	0	0	0	0	0
OTU_5678	0	1	0	0	1	1	0	0	0	0	0	0	0	3	1	0	0	0	0	0	0	0	0	0
OTU_2062	0	1	16	4	5	11	0	0	4	0	0	0	0	3	37	8	2	4	0	0	0	0	0	4
OTU_6531	0	1	0	0	0	0	0	0	0	0	0	0	0	0	0	0	0	0	0	0	0	0	0	0
OTU_4263	0	3	2	1	0	0	2	1	7	0	0	1	4	1	2	3	1	0	37	6	2	0	0	12
OTU_4795	0	1	0	0	0	0	0	0	0	0	0	0	0	0	0	0	0	0	0	0	0	0	0	0
OTU_1108	0	1	0	0	0	0	0	2	0	0	0	0	0	0	0	0	0	0	1	0	0	0	0	1
OTU_3548	0	1	0	0	0	0	0	0	0	0	0	0	0	2	0	0	0	0	0	0	0	0	0	0
OTU_835	0	2	11	0	0	0	0	0	13	0	0	0	0	0	16	3	0	0	0	6	0	0	0	0
OTU_3309	0	1	0	0	0	1	0	2	7	0	0	0	0	0	1	0	0	1	0	8	5	0	0	9
OTU_3252	0	1	0	0	0	0	0	0	0	0	0	0	0	0	0	0	0	0	0	1	0	0	0	0
OTU_4700	0	1	0	0	0	0	0	0	2	0	0	0	0	0	0	0	0	0	0	2	1	0	0	0
OTU_1716	0	2	0	0	8	0	0	0	0	0	0	0	0	0	1	0	1	0	0	0	0	0	0	0
OTU_3526	0	1	0	0	0	0	0	0	0	0	0	0	0	1	0	0	0	0	0	0	0	0	0	0
OTU_6559	0	1	2	0	2	0	0	0	0	0	0	0	0	0	0	0	0	0	0	0	0	0	0	0
OTU_3975	0	7	0	1	2	0	0	0	0	0	0	0	0	0	0	0	0	1	0	0	0	0	0	0
OTU_1712	0	4	1	0	0	0	0	0	0	0	0	0	0	1	0	0	0	0	0	0	0	0	0	0
OTU_760	0	7	0	0	0	0	0	0	0	0	0	0	0	3	0	0	0	0	0	0	0	0	0	0
OTU_4502	0	1	1	0	0	3	0	0	0	0	0	0	0	1	0	0	0	0	0	0	0	0	0	0
OTU_6245	0	8	3	1	0	0	0	0	3	0	0	0	0	37	4	0	0	0	0	3	0	0	0	0
OTU_4373	0	1	0	0	0	0	0	0	0	0	0	0	0	2	0	0	0	0	0	3	0	0	0	0
OTU_3504	0	1	0	0	0	1	0	0	0	0	0	0	0	0	0	0	0	0	0	0	0	0	0	0
OTU_957	0	2	0	0	0	0	0	0	0	0	0	0	0	0	0	0	4	0	0	0	0	0	0	0
OTU_3505	0	1	0	0	0	0	0	0	0	0	0	0	0	11	0	0	0	0	0	0	0	0	0	0
OTU_3235	0	1	0	0	0	0	0	0	0	0	0	0	0	0	0	0	0	0	0	0	0	0	0	0
OTU_5721	0	1	0	4	2	0	0	0	0	0	0	1	0	0	0	0	0	0	0	0	2	0	0	0
OTU_1967	0	2	9	0	0	0	0	0	3	0	0	0	0	5	8	0	0	0	0	0	4	0	0	0
OTU_3111	0	1	0	0	0	0	0	0	0	0	0	0	0	0	0	0	0	0	0	0	0	0	0	0
OTU_5011	0	8	33	0	0	0	0	0	2	0	0	0	0	5	24	0	0	0	0	1	5	0	0	0
OTU_6078	0	1	0	0	0	0	0	0	0	0	0	0	0	2	0	0	0	0	0	0	0	0	0	0
OTU_4369	0	1	0	0	0	0	1	0	0	0	0	0	8	0	0	0	0	0	0	0	0	0	0	0
OTU_4856	0	1	1	0	0	0	0	0	2	0	0	0	0	1	2	0	0	0	0	0	0	0	0	0
OTU_3547	0	1	0	0	0	0	0	0	0	0	0	0	0	1	0	0	0	0	0	0	0	0	0	0
OTU_5645	0	3	9	4	2	4	0	0	0	0	0	0	0	2	7	0	2	2	0	0	0	0	0	0
OTU_2728	0	1	0	0	0	0	0	0	0	0	0	0	0	2	0	0	0	0	0	0	0	0	0	0
OTU_4844	0	1	0	0	0	0	0	0	0	0	0	0	0	0	0	0	0	0	0	0	0	0	0	1
OTU_4871	0	1	3	0	0	0	0	0	0	0	0	0	0	0	0	0	0	0	0	0	0	0	0	0
OTU_6187	0	1	10	0	1	0	0	0	2	0	0	0	0	0	6	0	1	0	0	0	0	0	0	0
OTU_5708	0	5	3	0	0	0	0	0	0	0	0	0	0	4	3	0	0	0	0	4	5	0	0	0
OTU_580	0	3	8	3	2	1	0	4	4	0	0	0	0	3	7	7	2	3	0	1	0	0	0	0
OTU_3179	0	4	0	0	0	0	0	0	0	0	0	0	0	6	0	0	0	0	0	0	0	0	0	0
OTU_4773	0	1	0	0	0	0	0	0	0	0	0	0	0	0	0	0	0	0	0	0	0	0	0	0
OTU_5221	0	1	0	0	0	1	0	0	0	0	0	0	0	0	0	0	0	0	0	0	0	0	0	0
OTU_624	0	1	0	0	0	0	0	0	0	0	0	0	0	1	0	0	0	0	16	0	0	0	0	0
OTU_5047	0	3	1	0	0	0	0	0	0	0	0	0	0	0	2	0	0	0	0	0	0	0	0	0
OTU_604	0	3	26	0	4	3	0	0	2	0	0	0	0	0	10	0	0	2	0	0	0	0	6	0
OTU_2951	0	1	0	0	0	0	0	0	0	0	0	0	0	0	0	0	0	0	0	0	2	0	0	0
OTU_1384	0	6	5	0	1	0	0	4	10	0	0	0	0	1	2	0	0	0	1	6	0	0	0	0
OTU_213	0	10	4	0	0	1	0	7	10	0	0	0	0	3	4	6	0	0	1	8	1	0	6	2
OTU_1681	0	3	1	0	0	0	0	0	0	0	0	0	0	1	1	0	0	1	0	0	0	0	0	0
OTU_92	0	3	23	36	161	98	3	1	9	0	2	9	12	37	13	102	35	57	36	12	0	2	0	6
OTU_4940	0	2	0	156	0	2	0	1	36	220	67	14	0	1	4	2	6	1	1	66	102	0	34	9
OTU_1942	0	2	2	0	0	0	0	0	0	0	0	0	0	0	3	0	3	0	0	0	0	0	0	0
OTU_588	0	4	2	0	0	10	0	0	0	0	0	0	0	0	1	0	0	1	0	0	0	0	0	0
OTU_1260	0	3	0	0	0	0	0	0	4	0	0	0	0	0	0	0	0	0	0	0	0	0	0	0
OTU_305	0	5	0	1	0	0	0	87	9	11	8	0	0	0	0	0	0	0	13	2	0	0	0	0
OTU_1561	0	1	0	0	0	0	0	3	0	0	0	0	0	0	0	1	0	0	0	0	0	0	0	0
OTU_5715	0	1	0	0	0	0	0	0	0	0	0	0	0	0	0	0	0	0	0	0	0	0	0	0
OTU_239	0	2	1	5	2	4	0	5	12	0	0	0	0	0	6	13	6	4	0	2	13	0	13	33
OTU_5986	0	1	0	0	0	0	0	0	0	0	0	0	0	0	0	0	0	0	0	0	0	0	0	0
OTU_2997	0	2	3	0	2	0	0	0	0	0	0	0	0	1	0	0	0	0	0	0	0	0	0	0
OTU_3946	0	3	0	0	0	0	0	0	0	0	0	0	0	0	0	0	0	0	0	3	0	0	0	0
OTU_4233	0	1	0	0	0	0	0	0	0	0	0	0	0	0	0	0	0	0	0	0	0	0	0	0
OTU_4046	0	3	0	0	0	0	0	0	0	0	0	0	0	0	1	0	0	0	0	0	0	0	0	0
OTU_4234	0	1	0	0	0	0	0	0	0	0	0	0	0	0	0	0	0	0	0	0	0	0	0	0
OTU_1982	0	1	0	0	0	0	0	1	0	0	0	0	0	0	0	0	0	0	0	0	0	0	0	0
OTU_188	0	2	0	0	1	0	0	25	1	5	0	0	0	3	0	6	0	0	0	11	5	0	2	0
OTU_977	0	5	0	0	0	0	0	0	0	0	0	0	0	0	0	0	0	0	0	0	0	0	0	0
OTU_5295	0	1	0	0	0	0	0	0	0	0	0	0	0	0	0	0	0	0	0	0	0	0	0	0
OTU_1510	0	1	0	0	0	0	0	0	0	0	0	0	0	0	2	0	0	0	0	0	0	0	0	0
OTU_4621	0	8	0	1	3	2	0	0	0	0	0	0	0	1	1	12	7	1	0	0	129	0	2	0
OTU_5265	0	1	0	0	0	2	0	0	0	0	0	0	0	0	0	1	0	0	0	0	0	0	0	0
OTU_3080	0	1	0	0	0	0	0	0	0	0	0	0	0	0	0	0	0	0	0	0	0	0	0	0
OTU_715	0	2	1	0	0	1	0	0	1	0	0	0	0	2	9	0	0	0	0	0	0	0	0	0
OTU_2764	0	3	4	0	0	0	0	3	13	0	0	0	0	1	9	0	0	0	0	23	8	0	2	0
OTU_5984	0	1	0	0	0	0	0	0	0	0	0	0	0	0	0	0	0	0	0	0	0	0	0	0
OTU_688	0	2	1	0	1	5	0	0	0	0	0	0	0	0	1	2	0	0	0	1	0	0	0	0
OTU_5640	0	7	0	0	0	0	0	0	0	0	0	0	0	3	0	0	0	0	0	0	0	0	0	0
OTU_5391	0	1	1	0	0	5	0	1	5	1	2	2	0	3	1	5	3	0	10	11	11	0	8	18
OTU_1370	0	2	2	0	0	0	0	4	0	0	0	0	0	0	1	0	0	0	0	3	0	0	0	0
OTU_6072	0	1	0	0	0	0	0	4	4	3	1	0	1	0	0	0	0	0	0	0	0	0	0	1
OTU_1770	0	3	0	0	0	0	0	0	0	0	0	0	0	0	0	0	0	0	0	0	0	0	0	0
OTU_1620	0	2	0	2	0	0	0	0	0	0	0	0	0	1	1	0	0	0	0	0	4	0	0	0
OTU_2286	0	1	0	0	0	0	0	0	0	0	0	0	0	0	0	0	0	0	0	0	0	0	0	0
OTU_2607	0	4	0	0	0	0	0	0	0	0	0	0	0	2	0	0	0	0	0	0	0	0	0	0
OTU_698	0	5	12	1	0	6	0	0	0	0	0	0	0	3	13	4	0	6	0	4	0	0	0	0
OTU_1232	0	4	3	0	0	0	0	0	0	0	0	0	0	0	4	0	0	0	0	0	0	0	0	0
OTU_3113	0	2	0	0	0	0	0	0	0	0	0	0	0	0	0	0	0	0	0	0	0	0	0	0
OTU_910	0	3	5	0	0	2	0	0	2	0	0	0	0	0	5	0	3	0	0	0	0	0	0	0
OTU_3497	0	1	0	0	0	0	0	0	0	0	0	0	0	1	0	0	0	0	0	0	0	0	0	0
OTU_6138	0	1	0	0	0	0	0	0	0	0	0	0	0	0	0	0	0	0	0	0	0	0	0	0
OTU_192	0	3	0	0	2	1	0	28	14	0	1	0	0	1	4	0	0	2	68	17	7	0	9	8
OTU_22	0	1	3	17	47	18	12	1	19	7	9	18	0	8	2	26	54	176	0	46	7	0	26	37
OTU_2400	0	3	0	0	0	0	0	0	0	0	0	0	0	0	0	0	0	0	0	0	0	0	0	0
OTU_3566	0	1	0	0	0	0	0	0	0	0	0	0	0	0	0	0	0	0	0	0	0	0	0	0
OTU_1443	0	4	1	0	0	0	0	1	0	0	0	0	1	3	2	0	0	0	2	1	0	0	0	13
OTU_388	0	1	0	0	0	0	0	23	3	0	0	0	0	3	0	0	0	0	0	66	11	0	0	0
OTU_4846	0	1	0	0	0	0	0	0	0	0	0	0	0	0	0	0	0	0	0	0	0	0	0	0
OTU_314	0	4	17	1	4	6	0	0	12	1	0	0	0	4	7	6	3	5	0	0	0	0	1	3
OTU_2776	0	3	1	0	0	0	0	0	0	0	0	0	0	2	1	0	0	0	0	0	0	0	0	0
OTU_4033	0	5	0	0	0	0	0	0	0	0	0	0	0	3	1	0	0	0	0	0	0	0	0	0
OTU_3081	0	1	0	0	0	0	0	0	0	0	0	0	0	0	0	0	0	0	0	0	0	0	0	0
OTU_823	0	8	0	0	0	0	0	0	0	0	0	0	0	1	0	0	0	0	0	0	0	0	0	0
OTU_1068	0	4	0	0	0	0	0	0	0	0	0	0	0	0	0	0	0	0	0	0	0	0	0	0
OTU_786	0	6	0	0	2	2	0	7	0	0	0	0	0	1	0	0	2	0	4	3	1	0	0	0
OTU_499	0	1	0	0	0	0	0	0	0	0	0	0	0	0	0	0	0	0	0	0	0	0	1	16
OTU_1767	0	3	0	0	0	0	0	0	0	0	0	0	0	0	0	0	0	0	0	0	0	0	0	1
OTU_3676	0	1	0	0	0	0	0	5	0	0	0	0	0	0	0	0	0	0	3	15	2	0	0	0
OTU_643	0	2	17	4	5	0	0	0	0	0	0	0	0	0	21	22	3	0	0	0	0	0	0	0
OTU_1014	0	4	0	0	0	0	0	0	0	0	0	0	0	0	0	0	0	0	0	0	0	0	0	0
OTU_2266	0	3	0	0	0	2	0	0	0	0	0	0	0	1	1	0	2	1	0	0	0	0	0	0
OTU_2831	0	2	0	0	0	0	0	0	0	0	0	0	0	3	0	0	0	0	0	0	0	0	0	0
OTU_4637	0	2	0	0	0	0	0	0	0	0	0	0	0	0	0	0	0	0	0	0	0	0	0	0
OTU_472	0	1	5	0	0	12	0	0	0	0	0	0	0	0	7	1	0	4	0	0	0	0	0	0
OTU_5202	0	1	0	0	0	0	0	0	0	0	0	0	0	0	0	0	0	0	0	0	0	0	0	0
OTU_4527	0	3	0	0	0	0	0	0	0	0	0	0	0	0	0	0	0	0	0	0	0	0	0	0
OTU_283	0	1	0	0	0	0	0	2	0	0	0	0	1	0	0	0	0	0	50	0	0	0	0	0
OTU_3499	0	1	0	0	0	0	0	0	0	0	0	0	0	0	0	0	0	0	0	0	0	0	0	0
OTU_1563	0	1	0	0	0	4	0	0	0	0	0	0	0	3	7	0	0	1	0	0	2	0	0	0
OTU_2320	0	1	1	0	0	1	0	0	0	0	0	0	0	0	1	0	0	0	0	0	0	0	0	0
OTU_1055	0	1	2	0	0	6	0	0	1	0	0	0	0	6	1	3	0	0	0	0	0	0	0	0
OTU_4633	0	1	0	0	0	0	0	0	0	0	0	0	0	3	0	0	0	0	0	0	0	0	0	0
OTU_5847	0	1	0	0	0	0	0	0	0	0	0	0	0	0	0	0	0	0	0	0	0	0	0	0
OTU_5190	0	2	0	0	0	0	0	0	0	0	0	0	0	0	0	0	0	0	0	0	0	0	0	0
OTU_5010	0	3	0	0	0	0	0	0	0	0	0	0	0	0	0	0	0	0	0	0	0	0	0	0
OTU_5099	0	1	3	0	0	0	0	0	0	0	0	0	0	0	1	0	0	0	0	0	1	0	0	0
OTU_3489	0	1	0	0	0	0	0	0	0	0	0	0	0	0	1	1	0	0	0	0	0	0	0	0
OTU_1479	0	2	1	0	0	0	0	0	0	0	0	0	0	2	0	0	0	0	0	0	0	0	0	0
OTU_2351	0	2	0	0	1	0	0	0	0	0	0	0	1	0	0	2	0	0	4	0	0	0	0	0
OTU_6547	0	1	0	0	0	0	0	0	0	0	0	0	0	0	0	0	0	0	0	0	0	0	0	0
OTU_2802	0	1	0	0	0	0	0	1	0	0	0	0	0	0	0	0	0	0	0	2	0	0	0	0
OTU_5402	0	4	1	0	0	0	0	0	0	0	0	0	0	0	0	0	0	0	0	0	0	0	0	0
OTU_1756	0	15	0	0	0	0	0	0	0	0	0	0	0	0	0	0	0	0	0	0	0	0	0	0
OTU_735	0	3	2	5	0	2	0	0	0	0	0	0	0	6	2	0	0	0	0	1	1	0	0	0
OTU_2132	0	3	0	0	0	0	0	0	0	0	0	0	0	6	2	0	0	0	0	0	0	0	0	0
OTU_2477	0	1	0	0	0	1	0	0	0	0	0	0	0	1	0	0	0	0	0	0	0	0	0	0
OTU_1364	0	3	1	1	0	2	0	0	0	0	0	0	0	0	0	1	6	0	0	0	0	0	0	0
OTU_260	0	1	0	13	4	1	0	0	8	9	1	2	0	0	4	23	4	0	0	0	8	0	15	1
OTU_2038	0	1	0	0	0	1	0	0	2	0	0	0	0	0	0	0	0	0	0	1	7	0	0	0
OTU_203	0	1	0	0	3	11	0	0	0	0	0	9	1	0	0	0	0	9	2	0	0	0	1	13
OTU_1026	0	1	2	0	1	0	0	0	0	0	0	0	0	2	0	0	0	0	0	0	0	0	0	0
OTU_5853	0	1	0	0	0	0	0	0	0	0	0	0	0	0	0	0	0	0	0	0	0	0	0	0
OTU_126	0	1	9	34	20	17	0	0	0	0	0	0	2	0	50	94	22	4	0	0	0	0	0	1
OTU_1481	0	1	12	2	3	21	0	0	0	0	0	0	0	1	5	1	2	6	0	0	0	0	0	0
OTU_5818	0	1	0	0	0	0	0	0	0	0	0	0	0	0	0	0	0	0	0	0	0	0	0	0
OTU_2787	0	2	1	0	0	0	0	0	0	0	0	0	0	1	0	0	0	0	0	0	0	0	0	0
OTU_1455	0	9	0	0	0	0	0	0	1	0	0	0	0	3	0	0	0	0	0	2	0	0	0	0
OTU_4230	0	1	0	0	0	0	0	0	0	0	0	0	0	0	0	0	0	0	0	0	0	0	0	0
OTU_1453	0	2	0	0	0	0	0	0	3	0	0	0	0	0	0	0	0	0	0	0	0	0	0	0
OTU_224	0	7	5	0	7	27	0	0	6	0	1	0	0	10	11	0	3	4	0	2	3	0	7	4
OTU_536	0	3	8	0	1	3	0	5	4	0	0	0	0	6	16	0	0	2	0	0	0	0	0	2
OTU_3084	0	3	0	0	0	0	0	0	0	0	0	0	0	0	1	0	0	0	0	0	3	0	0	0
OTU_62	0	5	0	1	12	1	5	84	0	0	0	90	0	0	0	1	0	2	24	0	13	0	0	0
OTU_2989	0	3	2	0	2	0	0	0	2	0	0	0	0	0	3	4	0	0	0	0	0	0	0	0
OTU_2019	0	1	0	0	0	0	0	0	0	0	0	0	0	2	0	0	0	0	0	1	0	0	0	0
OTU_3819	0	1	0	0	0	0	0	0	0	0	0	0	0	0	0	0	0	0	0	0	0	0	0	0
OTU_3230	0	1	0	0	0	0	0	0	0	0	0	0	0	0	0	0	0	0	0	0	0	0	0	0
OTU_2649	0	1	0	0	0	0	0	0	0	0	0	0	0	0	0	0	0	0	0	0	0	0	0	0
OTU_510	0	1	0	1	0	1	0	0	0	0	0	0	2	1	0	0	1	0	17	2	0	0	1	5
OTU_4886	0	1	0	0	0	0	0	0	0	0	0	0	0	2	1	0	0	0	0	0	1	0	0	0
OTU_6512	0	1	0	0	0	0	0	0	0	0	0	0	0	0	0	0	0	0	0	0	0	0	0	0
OTU_6513	0	1	0	0	0	0	0	0	0	0	0	0	0	0	0	0	0	0	0	0	0	0	0	0
OTU_1715	0	4	0	0	0	0	0	0	0	0	0	0	0	0	0	0	0	0	0	0	0	0	0	0
OTU_2873	0	2	0	0	0	0	0	0	0	0	0	0	0	3	0	0	0	0	0	0	0	0	0	0
OTU_5820	0	2	0	0	0	0	0	0	0	0	0	0	0	0	0	0	0	0	0	0	0	0	0	0
OTU_3498	0	3	0	0	0	0	0	0	0	0	0	0	0	0	0	0	0	0	0	0	0	0	0	0
OTU_497	0	1	0	1	0	8	0	0	0	0	0	0	0	0	3	0	0	2	0	2	0	0	0	0
OTU_5442	0	2	0	0	0	0	0	0	0	0	0	0	0	0	0	0	0	0	0	0	0	0	0	0
OTU_1533	0	1	0	0	0	0	0	10	0	0	0	0	0	0	0	0	0	0	0	7	1	0	0	0
OTU_6357	0	1	0	0	0	0	0	0	0	0	0	0	0	0	0	0	0	0	0	0	0	0	0	0
OTU_4950	0	3	0	0	0	0	0	0	0	0	0	0	1	0	0	0	0	0	0	0	0	0	0	1
OTU_1415	0	1	0	0	0	0	0	5	0	0	0	0	0	0	0	0	0	0	0	0	0	0	0	3
OTU_3534	0	1	0	0	0	0	0	0	0	0	0	0	0	2	1	0	0	0	0	0	0	0	0	0
OTU_3051	0	3	11	2	15	17	0	0	1	0	0	0	0	7	11	5	11	43	0	0	0	0	0	1
OTU_5917	0	6	1	0	0	0	0	0	0	0	0	0	4	4	0	0	0	0	0	0	0	0	0	3
OTU_5700	0	1	0	0	0	0	0	0	0	0	0	0	0	0	0	0	0	0	0	0	0	0	0	0
OTU_5188	0	1	0	0	0	0	0	0	0	0	0	0	0	0	0	0	0	0	0	0	0	0	0	0
OTU_172	0	1	0	0	0	0	0	16	0	0	0	0	0	0	0	0	0	0	0	32	0	0	0	0
OTU_245	0	1	7	37	0	0	0	0	24	15	0	0	0	1	0	0	0	0	0	2	0	0	0	3
OTU_6214	0	5	0	0	0	0	0	0	0	0	0	0	0	0	0	0	0	0	0	0	0	0	0	0
OTU_594	0	3	3	0	3	11	0	0	0	0	0	0	0	1	8	2	0	13	0	0	0	0	0	2
OTU_4194	0	2	0	0	0	0	0	0	0	0	0	0	0	0	0	0	0	0	0	3	0	0	0	4
OTU_4264	0	1	0	0	0	0	0	0	0	0	0	0	0	1	0	0	0	0	0	0	0	0	0	0
OTU_6178	0	1	0	0	0	0	0	0	0	0	0	0	0	0	0	0	0	0	0	0	0	0	0	0
OTU_2198	0	3	0	0	0	0	0	0	0	0	0	0	0	0	0	0	0	0	0	0	0	0	0	0
OTU_5701	0	1	0	0	0	0	0	0	0	0	0	0	0	0	0	0	0	0	0	0	0	0	0	0
OTU_5978	0	11	19	1	2	9	0	0	5	1	0	0	0	9	18	4	1	5	0	2	0	0	0	0
OTU_1395	0	1	0	0	0	0	0	0	0	0	0	0	0	0	0	0	0	2	0	1	0	0	0	1
OTU_2578	0	2	1	0	0	0	0	0	0	0	0	0	0	0	0	0	0	0	0	0	0	0	0	0
OTU_2298	0	4	2	0	0	2	0	0	0	0	0	0	0	3	3	2	0	3	0	0	0	0	0	6
OTU_4634	0	2	0	0	0	0	0	0	0	0	0	0	0	1	0	0	0	0	0	0	0	0	0	0
OTU_6175	0	1	0	0	0	0	0	0	0	0	0	0	0	0	0	0	0	0	0	0	0	0	0	0
OTU_2605	0	3	3	0	0	0	0	0	0	0	0	0	0	4	4	0	0	0	0	0	0	0	0	0
OTU_5189	0	1	0	0	0	0	0	0	0	0	0	0	0	0	0	0	0	0	0	0	0	0	0	0
OTU_2200	0	2	0	0	0	0	0	0	0	0	0	0	0	0	0	0	0	0	0	0	0	0	0	0
OTU_909	0	6	0	0	0	1	0	0	0	0	0	0	0	0	0	0	0	0	0	0	0	0	3	0
OTU_522	0	5	5	0	0	0	0	23	47	0	0	0	0	0	0	0	0	0	0	11	42	0	0	0
OTU_5711	0	1	0	0	0	0	0	0	0	0	0	0	0	0	0	0	0	0	0	0	0	0	0	0
OTU_5972	0	2	0	0	0	0	0	0	0	0	0	0	0	0	0	0	0	0	0	0	0	0	0	0
OTU_3702	0	3	6	0	0	3	0	0	2	0	0	0	0	3	11	2	1	0	0	0	0	0	0	0
OTU_4324	0	7	0	0	0	0	1	0	0	0	0	0	1	0	0	4	0	0	0	0	0	0	0	1
OTU_3229	0	1	0	0	0	0	0	0	0	0	0	0	0	0	0	0	0	0	0	0	0	0	0	0
OTU_2847	0	1	0	0	1	0	0	0	0	0	0	0	0	0	0	0	0	0	0	0	0	0	0	0
OTU_6375	0	6	4	0	0	3	0	0	0	0	0	0	0	7	9	5	4	0	0	1	0	0	0	0
OTU_6281	0	3	0	0	0	0	0	0	0	0	0	0	0	1	0	0	0	0	0	1	0	0	0	0
OTU_3709	0	2	0	0	0	0	0	0	0	0	0	0	0	0	3	0	0	0	0	0	0	0	0	0
OTU_2782	0	2	0	0	0	0	0	0	0	0	0	0	0	0	0	0	0	0	0	0	0	0	0	0
OTU_3535	0	1	0	0	0	0	0	0	0	0	0	0	0	1	0	0	0	0	0	0	0	0	0	0
OTU_5971	0	1	0	0	0	0	0	0	0	0	0	0	0	0	0	0	0	0	0	0	0	0	0	0
OTU_1807	0	1	0	1	1	0	1	0	0	0	0	0	4	0	0	0	0	0	4	0	0	0	0	0
OTU_5932	0	1	3	0	2	2	0	0	4	0	0	0	0	1	3	0	0	0	0	0	0	0	0	1
OTU_204	0	2	19	0	2	0	0	0	43	0	1	0	0	0	7	0	2	0	0	12	17	0	13	4
OTU_110	0	1	0	0	1	1	59	9	6	0	0	0	509	0	1	2	1	3	19	0	0	0	10	94
OTU_4797	0	1	0	0	0	0	0	0	0	0	0	0	0	1	0	0	0	0	0	0	0	0	0	0
OTU_6015	0	1	0	0	0	0	0	0	0	0	0	0	0	0	0	0	0	0	0	0	0	0	0	0
OTU_5504	0	3	0	0	0	0	0	0	0	0	0	0	0	1	0	0	0	0	0	0	0	0	0	0
OTU_2410	0	1	0	0	0	2	0	0	0	0	0	0	0	1	2	0	1	0	0	0	0	0	2	1
OTU_2274	0	1	0	0	0	0	0	0	0	0	0	0	0	1	0	0	0	0	0	0	0	0	0	0
OTU_4411	0	1	2	0	0	0	0	0	0	0	0	0	0	0	2	0	0	0	0	0	0	0	0	0
OTU_654	0	1	0	0	0	0	14	0	1	0	0	0	3	0	0	0	0	1	90	0	0	0	1	3
OTU_2738	0	3	0	0	0	0	0	0	0	0	0	0	0	0	0	0	0	0	0	2	0	0	0	0
OTU_4042	0	1	0	0	0	1	0	0	1	0	0	0	0	0	1	0	1	1	0	0	0	0	1	0
OTU_2244	0	1	0	1	2	2	0	0	0	0	0	0	0	0	4	0	2	1	0	0	0	0	0	0
OTU_3186	0	3	0	0	0	0	0	0	0	0	0	0	0	8	1	0	0	0	0	0	0	0	0	0
OTU_3089	0	2	3	0	0	0	0	0	0	0	0	0	0	2	3	0	0	0	0	0	0	0	0	0
OTU_5970	0	1	0	0	0	0	0	0	0	0	0	0	0	0	0	0	0	0	0	0	0	0	0	0
OTU_5973	0	1	0	0	0	0	0	0	0	0	0	0	0	0	0	0	0	0	0	0	0	0	0	0
OTU_3380	0	1	0	0	1	0	0	0	0	0	0	1	3	0	0	0	0	0	8	0	0	0	0	1
OTU_5148	0	1	0	0	0	0	0	0	0	0	0	0	0	0	0	0	0	0	0	0	0	0	0	0
OTU_4623	0	1	1	1	0	0	0	0	0	0	0	0	0	1	1	0	0	0	0	0	0	0	0	0
OTU_2246	0	5	2	1	0	0	0	0	0	0	0	0	0	2	6	3	0	0	0	0	0	0	0	0
OTU_6055	0	1	0	0	0	0	0	0	0	0	0	0	0	0	0	1	0	0	0	0	0	0	0	0
OTU_3555	0	1	0	0	0	0	0	0	0	0	0	0	0	0	0	0	0	0	0	0	0	0	0	0
OTU_3653	0	2	0	0	0	0	0	0	0	0	0	0	0	0	0	0	0	0	0	0	0	0	0	0
OTU_6491	0	6	30	0	4	12	0	0	4	0	0	0	0	21	44	5	7	5	0	0	0	0	0	0
OTU_961	0	3	6	3	5	8	0	17	3	3	0	0	0	4	2	8	7	0	0	1	9	0	9	0
OTU_2197	0	2	0	0	0	0	0	0	0	0	0	0	0	0	0	2	0	0	0	0	0	0	0	0
OTU_6230	0	1	0	0	0	1	0	0	0	0	0	0	0	0	0	0	0	2	0	0	0	0	0	0
OTU_1040	0	5	6	0	2	6	0	2	0	0	0	0	0	4	5	2	0	9	0	0	2	0	0	2
OTU_4528	0	1	0	0	0	0	0	0	0	0	0	0	0	0	0	0	0	0	0	0	0	0	0	0
OTU_417	0	1	0	0	0	0	0	5	2	0	0	0	0	1	0	0	0	0	0	23	0	0	0	0
OTU_788	0	1	14	1	6	8	0	0	3	0	0	0	1	1	5	0	11	1	0	0	0	0	0	0
OTU_6262	0	5	9	1	0	0	0	0	0	0	0	0	0	6	9	0	0	0	0	0	0	0	0	0
OTU_3500	0	1	0	0	0	0	0	0	0	0	0	0	0	0	0	0	0	0	0	0	0	0	0	0
OTU_2199	0	1	0	0	0	0	0	0	0	0	0	0	0	0	0	0	0	0	0	0	0	0	0	0
OTU_4164	0	1	0	0	0	0	0	0	0	0	0	0	0	2	0	0	0	0	0	0	0	0	0	0
OTU_4916	0	4	4	3	2	0	0	0	1	0	0	2	0	8	3	5	0	2	0	1	1	0	1	1
OTU_4448	0	2	1	0	0	0	0	0	0	0	0	0	0	0	0	0	0	0	0	0	0	0	0	3
OTU_5350	0	1	0	0	1	0	0	0	0	0	0	0	0	0	0	0	0	0	0	0	0	0	0	0
OTU_6028	0	1	0	0	0	0	0	0	0	0	0	0	0	0	0	0	0	0	0	0	0	0	0	0
OTU_3993	0	1	0	0	0	0	0	0	0	0	0	0	0	0	0	0	0	0	0	0	0	0	0	0
OTU_3856	0	5	3	0	0	0	0	0	0	0	0	0	0	2	1	0	0	0	0	0	0	0	0	0
OTU_5852	0	1	0	0	0	0	0	0	0	0	0	0	0	0	0	0	0	0	0	0	0	0	0	0
OTU_1735	0	1	0	0	0	0	0	5	0	0	0	0	0	0	0	0	0	0	0	0	0	0	0	0
OTU_5585	0	1	0	0	0	0	0	0	0	0	0	0	0	0	0	0	0	0	0	0	0	0	0	0
OTU_487	0	7	3	0	0	0	0	16	1	0	0	0	0	8	6	0	0	1	2	6	7	0	0	0
OTU_2344	0	4	3	0	0	0	0	0	2	0	0	0	0	0	0	0	0	0	0	0	0	0	0	0
OTU_4427	0	2	0	0	0	0	0	0	0	0	0	0	0	3	0	0	0	0	0	0	0	0	0	0
OTU_1518	0	1	0	0	0	0	0	1	1	0	1	6	0	0	0	0	0	1	0	2	0	0	0	13
OTU_5821	0	1	0	0	0	0	0	0	0	0	0	0	0	0	0	0	0	0	0	0	0	0	0	0
OTU_5683	0	1	0	0	1	11	0	0	0	0	0	0	0	4	0	0	1	1	0	0	0	0	0	0
OTU_2783	0	3	4	0	0	0	0	0	0	0	0	0	0	3	3	0	0	0	0	0	0	0	0	0
OTU_658	0	1	2	1	12	3	0	0	0	0	0	0	0	0	6	2	5	30	0	0	0	0	1	9
OTU_1156	0	1	0	0	0	0	0	0	4	0	0	0	0	1	0	0	0	0	0	2	8	0	4	0
OTU_5586	0	1	0	0	0	0	0	0	0	0	0	0	0	0	0	0	0	0	0	0	0	0	0	0
OTU_5336	0	1	0	0	0	0	0	0	0	0	0	0	0	0	0	0	0	0	0	0	0	0	0	0
OTU_3480	0	2	0	0	0	0	0	0	0	0	0	0	0	0	2	3	0	0	0	0	0	0	0	0
OTU_4715	0	1	0	0	0	0	0	2	1	0	1	0	0	0	0	0	0	0	0	1	1	0	1	0
OTU_2201	0	4	0	0	0	0	0	0	0	0	0	0	0	2	0	0	0	0	0	0	0	0	0	0
OTU_2836	0	2	1	0	0	0	0	0	0	0	0	0	0	0	1	1	1	0	0	0	0	0	0	0
OTU_4845	0	3	0	0	0	0	0	0	0	0	0	0	0	0	0	0	0	0	0	0	0	0	0	0
OTU_4754	0	1	0	0	0	0	0	0	0	0	0	0	0	0	0	0	0	0	0	0	0	0	0	0
OTU_5587	0	2	0	0	0	0	0	0	0	0	0	0	0	0	0	0	0	0	0	0	0	0	0	0
OTU_2587	0	1	0	0	0	0	0	0	0	0	0	0	0	0	0	0	0	0	0	0	0	0	0	0
OTU_2288	0	7	0	0	0	0	0	0	0	0	0	0	0	0	0	0	0	0	0	0	0	0	0	7
OTU_392	0	2	0	1	8	0	5	12	1	5	0	9	23	0	0	0	0	0	9	0	0	0	0	0
OTU_2206	0	2	0	0	0	0	0	0	0	0	0	0	0	0	0	0	0	0	0	0	0	0	0	0
OTU_401	0	1	0	0	0	2	0	17	7	0	0	0	0	0	0	0	0	0	0	0	0	6	7	0
OTU_3112	0	1	0	0	0	0	0	0	0	0	0	0	0	0	0	0	0	0	0	0	0	0	0	0
OTU_5149	0	2	1	0	0	0	0	0	0	0	0	0	0	0	0	0	0	0	0	0	0	0	0	0
OTU_4231	0	2	0	2	0	0	0	1	2	3	2	4	0	0	0	0	0	0	0	2	3	0	1	0
OTU_5296	0	2	0	0	0	0	0	0	0	0	0	0	0	2	0	0	0	0	0	0	0	0	0	0
OTU_897	0	1	0	0	3	1	0	0	0	0	1	0	3	0	0	5	0	1	6	0	0	0	0	0
OTU_4166	0	1	0	0	0	0	0	0	0	0	0	0	0	0	1	0	0	0	0	0	0	0	0	0
OTU_2779	0	1	0	0	0	0	0	0	0	0	0	0	0	0	0	0	0	0	0	0	0	0	0	0
OTU_6536	0	1	0	0	0	0	0	0	0	0	0	0	0	0	0	0	0	0	0	0	0	0	0	0
OTU_5531	0	3	0	0	0	0	0	0	0	0	0	0	0	4	0	0	0	0	0	0	0	0	0	0
OTU_6021	0	1	0	0	0	0	0	0	0	0	0	0	0	1	1	0	0	0	0	0	0	0	0	0
OTU_6515	0	1	0	0	0	0	0	0	0	0	0	0	0	0	0	0	0	0	0	0	0	0	0	0
OTU_4392	0	1	0	0	0	0	0	0	0	0	0	0	0	0	0	0	0	0	2	0	0	0	0	0
OTU_6452	0	1	0	0	0	0	0	0	0	0	0	0	0	0	0	0	0	0	0	0	0	0	0	0
OTU_762	0	2	0	0	0	0	0	2	0	0	0	0	0	0	0	0	0	0	6	3	1	0	0	0
OTU_1318	0	3	0	0	0	0	0	1	0	0	0	0	0	2	0	0	0	0	0	4	0	0	0	0
OTU_2582	0	9	0	0	0	0	0	0	0	0	0	0	0	0	0	0	0	0	0	0	0	0	0	0
OTU_3557	0	1	0	0	0	0	0	0	0	0	0	0	0	0	0	0	0	0	0	0	0	0	0	0
OTU_3656	0	1	0	0	1	0	0	0	0	0	0	0	0	1	2	0	0	0	0	0	0	0	0	0
OTU_5342	0	1	0	0	0	0	0	0	0	0	0	0	0	0	0	0	0	0	0	0	0	0	0	0
OTU_88	0	1	0	3	237	2	0	0	0	0	7	0	0	0	0	0	0	3	0	0	0	0	3	0
OTU_2583	0	1	0	0	0	0	0	0	0	0	0	0	0	0	0	0	0	0	1	0	0	0	0	0
OTU_5019	0	1	0	0	0	2	0	0	0	0	0	0	0	0	3	0	1	0	0	0	0	0	0	0
OTU_5184	0	2	0	0	0	0	0	0	0	0	0	0	0	0	0	0	0	0	0	0	0	0	0	0
OTU_3576	0	1	0	0	0	1	0	0	0	0	0	0	0	0	1	0	0	0	0	0	0	0	0	0
OTU_5714	0	1	0	0	0	0	0	0	0	0	0	0	0	0	0	0	0	0	0	0	0	0	0	0
OTU_3477	0	2	0	0	0	0	0	0	1	0	0	0	0	0	1	0	0	0	2	0	1	0	0	0
OTU_5294	0	1	0	0	0	0	0	0	0	0	0	0	0	4	0	0	0	0	0	0	0	0	0	0
OTU_2962	0	2	0	0	0	3	0	1	0	0	0	0	1	0	0	0	0	0	0	0	0	0	0	1
OTU_425	0	6	0	0	0	0	0	0	0	0	0	0	0	2	0	0	13	0	0	0	0	0	0	0
OTU_2469	0	2	0	0	0	0	0	0	2	0	0	0	0	1	0	0	0	0	0	0	0	0	0	0
OTU_2484	0	2	0	0	0	3	0	0	0	0	0	0	0	1	0	0	0	2	0	0	0	0	0	0
OTU_6012	0	1	0	0	0	0	0	0	0	0	0	0	0	0	1	0	0	0	0	0	0	0	0	0
OTU_1999	0	1	0	0	0	0	0	0	0	0	0	0	0	1	4	0	0	0	0	0	0	0	0	0
OTU_6183	0	2	0	0	0	0	0	0	0	0	0	0	0	0	0	0	0	0	0	1	0	0	0	0
OTU_2829	0	2	0	0	0	0	0	0	0	0	0	0	0	1	1	0	0	0	0	0	0	0	0	0
OTU_1607	0	4	14	0	0	0	0	0	0	0	0	0	0	2	1	0	0	0	0	0	0	0	0	0
OTU_1777	0	1	2	0	0	4	0	0	1	0	0	0	1	1	1	0	0	0	7	0	0	0	0	0
OTU_4529	0	1	0	0	0	0	0	0	0	0	0	0	0	0	0	0	0	0	0	0	0	0	0	0
OTU_6497	0	3	0	0	0	0	0	0	0	0	0	0	0	0	0	0	0	0	0	0	0	0	0	0
OTU_225	0	2	4	0	0	1	0	5	44	2	6	8	0	1	1	0	1	0	0	30	75	0	12	25
OTU_692	0	1	1	0	0	0	0	0	0	0	0	0	0	0	0	1	0	0	0	0	9	0	0	0
OTU_1883	0	1	0	0	0	1	0	0	1	0	0	0	0	0	6	0	0	0	0	0	0	0	0	0
OTU_3551	0	1	0	0	0	0	0	0	0	0	0	0	0	0	0	0	0	0	0	0	0	0	0	0
OTU_3114	0	1	0	0	0	0	0	0	0	0	0	0	0	0	0	0	0	0	0	0	0	0	0	0
OTU_451	0	1	1	0	0	0	0	12	11	0	0	0	0	3	1	0	0	0	12	24	6	0	0	3
OTU_1504	0	2	0	0	0	0	0	1	0	0	0	0	0	0	0	0	0	0	0	2	0	0	0	0
OTU_1640	0	1	0	0	0	0	0	0	0	0	0	0	0	4	0	0	0	0	0	0	0	0	0	0
OTU_2292	0	3	0	0	0	0	0	0	0	0	0	0	0	1	0	0	0	0	0	0	0	0	0	0
OTU_3018	0	1	0	0	0	0	0	0	0	0	0	0	0	0	3	0	0	0	0	0	0	0	0	0
OTU_491	0	3	46	3	5	11	0	0	10	0	0	0	0	4	38	9	0	8	0	0	0	0	1	0
OTU_5225	0	2	0	0	2	0	0	40	24	0	1	1	0	0	4	0	0	0	13	24	23	0	6	5
OTU_2079	0	3	0	0	0	0	0	0	0	0	0	0	0	0	0	0	0	0	0	0	0	0	0	0
OTU_2193	0	1	0	0	0	0	0	0	0	0	0	0	0	0	0	0	0	0	0	0	0	0	0	0
OTU_3083	0	1	0	0	0	0	0	0	0	0	0	0	0	0	0	0	0	0	0	0	0	0	0	0
OTU_218	0	1	0	0	0	0	5	3	1	0	0	0	8	0	0	0	0	0	18	1	0	0	0	0
OTU_5470	0	1	0	0	0	0	0	0	3	0	0	1	0	0	0	0	0	0	0	1	7	0	2	0
OTU_5155	0	1	0	0	0	0	0	0	0	0	0	0	0	0	0	0	0	0	0	0	0	0	0	0
OTU_5106	0	2	8	0	0	0	0	0	0	0	0	0	0	1	13	0	0	0	0	0	0	0	0	0
OTU_6010	0	1	0	0	0	0	0	0	0	0	0	0	0	0	0	0	0	0	0	0	0	0	0	0
OTU_5343	0	1	0	0	0	0	0	0	0	0	0	0	0	0	0	0	0	0	0	0	0	0	0	0
OTU_2455	0	1	0	0	0	0	0	2	0	0	0	0	0	1	0	0	0	0	0	0	0	0	0	0
OTU_243	0	1	0	0	0	0	0	1	0	0	0	0	0	0	0	0	0	0	8	324	0	0	0	0
OTU_1290	0	1	1	0	0	0	0	0	0	0	0	0	0	1	18	0	2	4	0	0	0	0	0	0
OTU_5243	0	1	1	0	0	0	0	0	0	0	0	0	0	1	0	0	0	0	0	0	0	0	0	0
OTU_5205	0	1	1	0	0	0	0	0	0	0	0	0	0	1	0	0	0	0	0	0	0	0	0	0
OTU_539	0	1	0	0	0	0	0	10	0	0	0	0	0	0	0	0	0	0	42	20	0	0	0	2
OTU_3017	0	2	1	0	0	0	0	0	0	0	0	0	0	1	4	1	0	0	0	0	0	0	0	0
OTU_484	0	1	5	1	1	10	0	0	0	0	0	0	0	1	9	1	0	7	0	0	0	0	0	0
OTU_2141	0	1	0	0	3	0	0	3	0	0	0	0	0	1	1	0	0	0	0	0	3	0	1	2
OTU_5445	0	1	0	0	0	0	0	0	0	0	0	0	0	0	0	0	0	0	0	0	0	0	0	0
OTU_4232	0	1	0	0	0	0	0	0	0	0	0	0	0	0	0	0	0	0	0	0	0	0	0	0
OTU_3853	0	1	0	0	0	0	0	0	0	0	0	0	0	0	2	0	0	0	0	0	0	0	0	0
OTU_5846	0	1	1	0	0	0	0	0	0	0	0	0	0	0	0	0	0	0	0	0	0	0	0	0
OTU_2931	0	1	0	0	0	0	0	0	1	0	0	0	0	0	0	0	0	1	0	0	0	0	0	0
OTU_1053	0	2	0	0	0	0	0	0	4	0	0	0	0	6	0	0	0	0	0	0	0	0	0	0
OTU_2188	0	3	0	0	0	0	0	0	0	0	0	0	0	1	0	0	0	0	0	0	0	0	0	1
OTU_6362	0	1	0	0	0	0	0	0	0	0	0	0	0	0	0	0	0	0	0	0	0	0	0	0
OTU_5444	0	1	0	0	0	0	0	0	0	0	0	0	0	0	0	0	0	0	0	0	0	0	0	0
OTU_5153	0	1	0	0	0	0	0	0	0	0	0	0	0	0	0	0	0	0	0	0	0	0	0	0
OTU_3085	0	1	0	0	0	0	0	0	0	0	0	0	0	0	0	0	0	1	0	0	0	0	0	0
OTU_2293	0	2	0	0	0	0	0	0	0	0	0	0	0	0	0	0	0	0	0	0	0	0	0	0
OTU_4015	0	2	10	0	0	0	0	0	0	0	0	0	0	0	3	0	0	0	0	0	0	0	0	0
OTU_6534	0	1	0	0	0	0	0	0	0	0	0	0	0	0	0	0	0	0	0	0	0	0	0	0
OTU_5532	0	1	0	0	0	0	0	0	0	0	0	0	0	2	0	0	0	0	0	0	0	0	0	0
OTU_6363	0	1	0	0	0	0	0	0	0	0	0	0	0	0	0	0	0	0	0	0	0	0	0	0
OTU_1879	0	2	0	0	0	0	0	8	2	0	0	0	0	0	0	0	0	0	0	27	11	0	0	0
OTU_5012	0	1	0	0	0	0	0	0	0	0	0	0	0	0	0	0	0	0	0	0	0	0	0	0
OTU_1485	0	1	3	0	0	0	0	0	0	0	0	0	0	1	3	0	0	4	0	0	0	0	0	0
OTU_4038	0	1	0	0	0	0	0	0	0	0	0	0	0	0	0	0	0	0	0	0	0	0	0	0
OTU_5709	0	1	0	0	0	0	0	0	0	0	0	0	0	0	0	0	0	0	0	0	0	0	0	0
OTU_6546	0	1	0	0	0	0	0	0	1	0	0	0	0	1	0	0	0	0	0	0	0	0	0	0
OTU_3811	0	1	0	0	0	0	0	0	0	0	0	0	0	0	0	0	0	0	0	0	0	0	0	0
OTU_4171	0	1	7	1	0	1	0	0	0	0	0	0	0	1	9	3	0	0	0	0	0	0	0	0
OTU_1343	0	3	0	0	0	0	0	0	0	0	0	0	0	0	0	0	0	0	0	0	0	0	0	0
OTU_6009	0	1	1	1	0	0	0	0	0	0	0	0	0	0	0	0	1	0	0	0	0	0	0	0
OTU_1761	0	3	0	0	0	0	0	0	0	0	0	0	0	1	0	0	0	0	0	0	0	0	0	0
OTU_6477	0	1	0	0	0	0	0	1	7	0	0	0	0	0	0	0	0	0	4	2	1	0	0	0
OTU_3090	0	4	0	0	0	0	0	0	0	0	0	0	0	0	0	0	0	0	0	0	0	0	0	0
OTU_6454	0	1	0	0	0	0	0	0	0	0	0	0	0	0	0	0	0	0	0	0	0	0	0	0
OTU_2355	0	1	0	0	0	0	0	0	0	0	0	0	0	1	0	0	0	0	0	0	0	0	0	1
OTU_2785	0	1	1	0	0	0	0	0	0	0	0	0	0	0	0	0	0	0	0	0	0	0	0	0
OTU_2784	0	1	0	0	0	0	0	0	0	0	0	0	0	1	0	0	0	0	0	0	0	0	0	0
OTU_613	0	1	0	0	0	1	0	6	2	1	0	0	0	2	0	0	0	0	0	52	0	0	0	0
OTU_2434	0	2	0	0	0	0	0	2	1	0	0	0	0	0	0	0	0	0	0	0	0	0	0	0
OTU_992	0	1	1	0	1	0	0	0	6	0	0	0	0	1	5	0	0	0	0	0	2	0	10	11
OTU_5851	0	1	0	0	0	0	0	0	0	0	0	0	0	0	0	0	0	0	0	0	0	0	0	0
OTU_4318	0	1	0	0	0	0	0	0	0	0	0	0	0	0	0	0	0	0	0	0	0	0	0	0
OTU_5788	0	1	0	0	0	0	0	0	0	0	0	0	0	0	0	0	0	0	0	0	0	0	0	0
OTU_3254	0	1	0	0	0	0	0	0	0	0	0	0	0	1	0	0	0	0	0	0	0	0	0	0
OTU_4530	0	2	0	0	0	0	0	0	1	0	0	0	0	0	0	0	0	0	0	0	0	0	0	0
OTU_6019	0	1	0	0	0	0	0	0	0	0	0	0	0	0	0	0	0	0	0	0	0	0	0	0
OTU_5933	0	1	0	0	0	0	0	0	1	0	0	0	0	0	0	0	0	0	0	0	0	0	0	0
OTU_185	0	1	46	11	16	38	0	0	28	1	0	2	0	0	40	8	18	45	0	1	23	0	11	8
OTU_3622	0	2	0	0	0	0	0	0	0	0	0	0	0	0	1	0	0	0	0	0	0	0	1	0
OTU_5575	0	2	0	0	0	0	0	0	0	0	0	0	0	1	0	0	0	0	0	1	0	0	0	0
OTU_4043	0	2	0	0	0	0	0	0	0	0	0	0	0	1	0	0	0	0	4	1	0	0	0	1
OTU_4882	0	1	4	0	0	0	0	0	1	0	0	0	0	1	3	2	1	1	0	0	0	0	0	1
OTU_2285	0	1	1	0	0	0	0	0	3	0	0	0	0	9	4	0	0	0	0	0	0	0	0	0
OTU_5462	0	1	0	1	0	0	156	99	0	0	0	0	0	0	0	0	0	5	0	0	0	0	0	0
OTU_3829	0	3	10	0	0	0	0	0	0	0	0	0	0	4	1	0	0	0	0	0	0	0	0	0
OTU_1320	0	2	3	1	0	2	0	0	0	0	0	0	0	5	0	0	0	0	0	0	0	0	0	2
OTU_1089	0	1	3	0	1	1	0	0	0	0	0	0	0	1	7	0	2	2	0	0	0	0	0	0
OTU_5649	0	1	0	0	0	0	0	0	0	0	0	0	0	1	0	0	0	0	0	0	0	0	0	0
OTU_4430	0	2	0	0	0	0	0	0	0	0	0	0	0	1	0	0	0	0	0	0	0	0	0	0
OTU_2877	0	1	0	0	0	0	0	0	0	0	0	0	0	1	0	0	0	0	0	3	0	0	0	0
OTU_5939	0	1	0	0	0	0	0	0	0	0	0	0	0	0	1	0	0	0	0	1	0	0	0	0
OTU_5046	0	1	0	0	0	0	0	0	0	0	0	0	0	0	0	0	0	0	0	0	0	0	0	0
OTU_2560	0	1	2	0	0	1	0	0	0	0	0	0	0	1	0	0	1	3	0	2	0	0	0	0
OTU_6177	0	1	0	0	0	0	0	0	0	0	0	0	0	0	0	0	0	0	0	0	0	0	0	0
OTU_2590	0	1	0	0	1	0	0	0	0	0	0	0	0	0	0	0	0	0	0	0	0	0	0	0
OTU_4235	0	1	0	0	0	0	0	0	0	0	0	0	0	0	0	0	0	0	0	0	0	0	0	0
OTU_5151	0	1	0	0	0	0	0	0	0	0	0	0	0	0	0	0	0	0	0	0	0	0	0	0
OTU_1041	0	1	0	0	0	0	0	0	5	0	0	0	0	2	1	1	0	0	0	0	0	0	0	0
OTU_1213	0	2	3	0	2	4	0	0	0	0	0	0	0	1	4	0	2	5	0	0	0	0	0	0
OTU_4860	0	1	0	0	0	0	0	0	0	0	0	0	0	0	0	0	0	0	0	0	0	0	0	0
OTU_3408	0	1	0	0	0	2	0	0	0	0	0	0	0	5	0	0	0	0	0	0	0	0	0	0
OTU_5178	0	3	0	0	0	0	0	0	0	0	0	0	0	0	0	0	0	0	0	3	0	0	0	0
OTU_423	0	2	1	4	0	1	0	20	20	1	1	3	0	5	4	5	3	1	6	10	22	0	16	4
OTU_2644	0	1	1	0	0	0	0	0	0	0	0	0	0	0	0	0	0	0	0	0	0	0	0	0
OTU_5150	0	1	0	0	0	0	0	0	0	0	0	0	0	0	0	0	0	0	0	0	0	0	0	0
OTU_513	0	1	0	0	0	0	0	0	1	0	3	3	0	1	0	0	0	0	0	0	0	0	15	30
OTU_5569	0	1	0	0	0	0	0	0	0	0	0	0	0	0	0	0	0	0	0	0	0	0	0	0
OTU_6625	0	1	1	1	0	5	0	0	0	0	0	0	0	1	1	1	0	4	0	0	1	0	0	0
OTU_4131	0	2	7	0	0	0	0	0	0	0	0	0	0	3	1	4	0	0	0	0	0	0	0	0
OTU_5919	0	1	0	0	0	0	0	0	0	0	0	0	0	0	0	0	0	0	0	0	0	0	0	0
OTU_1349	0	1	0	0	0	0	0	5	0	0	0	0	0	0	0	0	0	0	3	1	0	0	0	0
OTU_2586	0	2	0	0	0	0	0	0	0	0	0	0	0	0	0	0	0	0	0	0	0	0	0	0
OTU_876	0	1	0	0	0	0	0	2	0	0	0	0	0	0	0	0	0	0	0	10	0	0	0	0
OTU_4150	0	1	0	0	1	0	0	0	0	0	0	0	0	0	1	0	0	0	0	0	0	0	0	0
OTU_5152	0	1	0	0	0	0	0	0	0	0	0	0	0	0	0	0	0	0	0	0	0	0	0	0
OTU_5449	0	1	0	0	0	0	0	0	0	0	0	0	0	0	0	0	0	0	0	0	0	0	0	0
OTU_409	0	1	0	0	0	0	0	10	2	0	0	0	0	1	0	0	0	0	0	17	0	0	0	0
OTU_1158	0	1	4	1	1	0	0	0	0	0	0	0	0	0	13	1	2	0	0	0	2	0	0	0
OTU_1588	0	1	0	0	0	0	0	3	0	0	0	0	0	3	0	0	0	0	0	3	1	0	0	0
OTU_6632	0	1	7	0	0	0	0	0	0	0	0	0	0	5	0	0	0	0	0	0	0	0	0	0
OTU_6453	0	1	0	0	0	0	0	0	0	0	0	0	0	0	0	0	0	0	0	0	0	0	0	0
OTU_694	0	1	8	0	1	0	0	0	0	0	0	0	0	0	3	1	0	1	0	0	3	0	0	0
OTU_906	0	1	1	0	0	1	0	0	0	0	0	0	0	1	5	0	0	0	0	0	0	0	0	0
OTU_5481	0	2	0	0	0	0	0	0	1	0	0	0	0	0	3	0	0	1	0	0	0	0	0	0
OTU_4366	0	2	0	0	0	0	0	0	0	1	0	0	0	0	0	0	0	0	0	1	0	0	0	0
OTU_330	0	1	0	0	0	0	0	22	10	3	0	3	0	0	0	0	0	0	0	28	19	0	1	9
OTU_5128	0	2	12	1	1	5	0	0	3	0	0	0	0	5	4	0	0	5	0	4	4	0	3	2
OTU_3507	0	1	2	0	0	0	0	0	0	0	0	0	0	0	0	0	0	1	0	0	0	0	0	0
OTU_3233	0	1	0	0	0	0	0	0	0	0	0	0	0	0	0	0	0	0	0	0	0	0	0	0
OTU_5044	0	1	0	0	0	0	0	0	0	0	0	0	0	0	0	0	0	0	0	0	0	0	0	0
OTU_941	0	1	0	0	0	0	0	1	11	1	0	0	0	0	0	0	0	0	0	4	10	0	5	2
OTU_5576	0	1	0	0	0	0	0	0	0	0	0	0	0	0	0	0	0	0	0	0	0	0	0	0
OTU_5552	0	1	0	0	0	0	4	0	0	0	0	0	0	0	0	0	0	0	0	0	0	0	0	0
OTU_5918	0	1	0	0	0	0	0	0	0	0	0	0	0	0	0	0	0	0	0	0	0	0	0	0
OTU_6443	0	1	0	0	3	1	0	0	0	0	0	0	0	0	0	0	11	0	1	0	0	2	4	0
OTU_5297	0	1	0	0	0	0	0	0	0	0	0	0	0	0	0	0	0	0	0	0	0	0	0	0
OTU_3038	0	1	0	0	1	0	0	0	0	0	0	0	0	0	0	0	0	0	0	0	0	0	1	0
OTU_6189	0	2	0	0	0	0	0	0	0	0	0	0	0	0	0	0	0	0	0	0	0	0	0	0
OTU_1722	0	2	0	0	0	0	0	0	0	0	0	0	0	0	0	0	0	0	0	5	0	0	0	0
OTU_672	0	1	9	2	0	0	0	2	13	0	0	0	0	0	0	0	0	0	1	32	38	0	1	0
OTU_5446	0	1	0	0	0	0	0	0	0	0	0	0	0	0	0	0	0	0	0	0	0	0	0	0
OTU_2203	0	1	2	0	0	0	0	0	0	0	0	0	0	0	0	0	0	0	0	0	0	0	0	0
OTU_348	0	1	4	0	28	40	0	0	0	0	0	0	0	2	2	1	3	20	0	0	8	0	6	9
OTU_2205	0	1	0	0	0	0	0	0	0	0	0	0	0	0	0	0	0	0	0	0	0	0	0	0
OTU_2182	0	2	0	1	0	0	0	0	0	0	0	0	0	0	0	0	0	0	0	1	2	4	0	0
OTU_1976	0	1	5	0	1	1	0	0	0	0	0	0	0	0	4	0	0	1	0	0	0	0	0	0
OTU_3032	0	1	0	0	0	0	0	0	1	0	0	0	0	0	0	0	0	0	0	0	0	0	0	0
OTU_6533	0	1	0	0	0	0	0	0	0	0	0	0	0	1	0	0	0	0	0	0	0	0	0	0
OTU_6088	0	1	0	0	0	0	0	0	0	0	0	0	0	1	0	0	0	0	0	0	0	0	0	0
OTU_2678	0	1	0	0	0	0	0	0	0	0	0	0	0	0	0	0	0	0	0	0	0	0	0	1
OTU_2617	0	1	0	0	0	0	0	3	0	0	0	0	0	0	0	0	0	0	0	0	0	0	0	0
OTU_3234	0	1	0	0	0	0	0	0	0	0	0	0	0	0	0	0	0	0	0	0	0	0	0	0
OTU_5663	0	1	0	0	0	0	0	0	0	0	0	0	0	0	0	0	0	0	0	2	0	0	0	0
OTU_3679	0	1	0	0	0	0	1	1	0	0	0	0	0	0	0	0	0	0	5	0	0	0	0	0
OTU_5447	0	1	0	0	0	0	0	0	0	0	0	0	0	0	0	0	0	0	0	0	0	0	0	0
OTU_3655	0	1	1	0	2	10	0	0	0	0	1	1	0	0	1	0	1	2	0	0	0	0	1	1
OTU_3945	0	2	0	0	0	0	0	0	0	0	0	0	0	0	0	0	0	0	0	1	0	0	0	0
OTU_14	0	1	4	0	0	295	0	0	3	7	4	8	2	0	7	219	545	118	2	7	7	0	452	27
OTU_1376	0	2	10	5	7	4	0	0	0	0	0	0	0	1	5	1	7	2	0	0	4	0	0	0
OTU_1373	0	1	10	0	0	5	0	0	1	0	0	0	0	0	11	0	8	13	0	0	0	0	0	0
OTU_372	0	2	0	0	0	0	0	0	0	0	0	0	0	31	0	0	0	0	0	0	0	0	0	0
OTU_2589	0	2	0	0	0	0	0	0	0	0	0	0	0	0	0	0	0	0	0	0	0	0	0	0
OTU_2596	0	1	0	0	0	0	0	0	0	0	0	0	0	0	0	0	0	0	0	0	0	0	0	0
OTU_2581	0	1	1	0	0	0	0	0	0	0	0	0	0	0	0	0	0	0	0	0	0	0	0	0
OTU_5913	0	1	0	0	0	0	0	0	0	0	0	0	0	1	1	0	0	0	0	0	0	0	0	0
OTU_2601	0	1	1	0	1	0	0	0	2	0	0	0	0	0	0	0	0	0	0	0	0	0	0	0
OTU_1278	0	2	0	0	0	0	0	13	3	0	0	0	0	1	0	0	0	0	0	1	1	0	0	0
OTU_3415	0	1	0	0	0	0	0	0	0	0	0	0	0	0	1	0	0	0	0	0	0	0	0	0
OTU_1743	0	1	0	0	0	0	0	0	0	0	0	0	0	1	0	0	0	0	0	5	0	0	0	0
OTU_5707	0	1	0	0	0	0	0	0	0	0	0	0	0	0	0	0	0	0	0	0	0	0	0	0
OTU_4167	0	1	0	0	0	0	0	0	0	0	0	0	0	0	1	0	0	0	0	0	0	0	0	0
OTU_4416	0	1	0	0	0	0	0	0	0	0	0	0	0	0	0	0	0	0	0	1	0	0	0	0
OTU_3088	0	1	0	0	0	0	0	0	0	0	0	0	0	0	0	0	0	0	0	0	0	0	0	0
OTU_4776	0	3	0	0	0	1	0	0	0	0	0	0	0	0	0	0	0	1	0	0	0	0	0	0
OTU_2208	0	1	1	0	0	0	0	0	0	0	0	0	0	2	1	0	0	0	0	0	0	0	0	0
OTU_2807	0	1	0	0	0	0	0	0	0	0	0	0	0	0	0	0	0	0	0	0	0	0	0	0
OTU_4721	0	1	0	0	0	0	0	0	0	0	0	0	0	2	0	0	0	0	0	0	0	0	0	0
OTU_2636	0	1	0	0	0	0	0	0	0	0	0	0	0	0	0	0	0	0	0	0	0	0	0	0
OTU_3831	0	1	0	0	0	0	0	0	0	0	0	0	0	0	0	0	0	0	0	0	0	0	0	0
OTU_3177	0	1	0	0	0	0	0	0	0	0	0	0	0	1	0	0	0	0	0	0	0	0	0	0
OTU_4682	0	1	0	0	0	0	0	0	0	0	0	0	0	0	1	0	0	0	0	0	0	0	0	0
OTU_4352	0	1	0	0	0	0	0	0	3	0	0	0	0	0	0	0	0	0	0	1	0	0	0	0
OTU_2291	0	1	0	0	0	0	0	0	0	0	0	0	0	0	0	0	0	0	0	0	0	0	0	0
OTU_2209	0	1	0	0	0	0	0	0	1	0	0	0	0	2	0	0	0	0	0	0	0	0	0	0
OTU_5830	0	1	1	0	0	0	0	0	0	0	0	0	0	0	1	0	0	0	0	0	0	0	0	0
OTU_5987	0	1	0	0	0	0	0	0	0	0	0	0	0	0	0	0	0	0	0	0	0	0	0	0
OTU_3029	0	1	0	0	0	0	0	0	0	0	0	0	0	0	0	0	0	0	0	0	0	0	0	0
OTU_2080	0	3	0	0	0	0	0	0	0	0	0	0	0	0	0	0	0	0	0	0	0	0	0	0
OTU_5405	0	1	0	0	1	1	0	0	0	0	0	0	2	0	0	0	0	0	5	0	0	0	0	0
OTU_2183	0	2	1	0	0	0	0	0	0	0	0	0	0	0	0	0	0	0	0	1	0	0	1	1
OTU_5136	0	1	1	0	0	0	0	0	1	0	0	0	0	0	0	0	0	0	0	0	0	0	0	0
OTU_6396	0	1	0	0	0	0	0	0	0	0	0	0	0	0	0	0	0	0	0	0	0	0	0	0
OTU_3830	0	1	0	0	0	0	0	0	0	0	0	0	0	0	0	0	0	0	0	0	0	0	0	0
OTU_5120	0	1	0	0	0	0	0	0	0	0	0	0	0	1	0	0	0	0	0	1	0	0	0	0
OTU_5900	0	1	0	0	0	0	0	0	0	0	0	0	0	0	0	0	0	0	0	0	0	0	0	0
OTU_6234	0	1	0	0	0	0	0	0	0	0	0	0	0	0	0	0	0	0	0	0	0	0	0	0
OTU_111	0	1	3	0	0	1	0	4	90	0	0	0	0	3	1	0	0	0	1	222	0	0	0	0
OTU_262	0	2	1	1	2	0	0	3	25	1	0	1	0	0	0	0	0	0	14	3	19	0	0	1
OTU_3832	0	1	0	0	0	0	0	0	0	0	0	0	0	4	0	0	0	0	0	0	0	0	0	0
OTU_3509	0	1	0	0	0	0	0	0	0	0	0	0	0	0	0	0	0	0	0	0	0	0	0	0
OTU_2654	0	1	1	0	0	1	0	0	0	0	0	0	0	0	5	0	1	2	0	2	0	0	0	0
OTU_5831	0	1	0	0	0	0	0	0	0	0	0	0	0	0	0	0	0	0	0	0	0	0	0	0
OTU_867	0	1	13	0	2	0	0	0	0	0	0	0	0	3	0	0	0	0	0	0	0	0	0	0
OTU_6074	0	1	2	0	0	1	0	0	1	1	0	0	0	0	2	0	0	0	0	0	1	0	0	1
OTU_586	0	1	1	0	0	0	24	0	0	0	0	0	0	0	1	0	0	0	0	4	0	0	0	0
OTU_1452	0	1	6	0	0	5	0	10	18	0	0	0	0	2	10	0	0	0	0	12	12	0	0	1
OTU_6029	0	1	0	0	0	0	0	0	0	0	0	0	0	0	0	0	0	0	0	0	0	0	0	0
OTU_3007	0	1	0	0	0	3	0	0	0	0	0	0	0	0	0	0	0	0	0	0	3	0	0	0
OTU_3799	0	1	0	0	12	0	0	2	4	0	0	0	0	0	0	2	1	1	0	6	2	0	2	0
OTU_2256	0	1	1	0	0	0	0	0	0	0	0	0	0	0	0	0	1	0	0	0	0	0	0	0
OTU_6356	0	1	0	0	0	0	0	0	0	0	0	0	0	0	0	0	0	0	0	0	0	0	0	0
OTU_1896	0	1	0	0	0	0	0	0	0	0	0	0	0	1	0	3	0	2	0	0	0	0	0	0
OTU_6190	0	1	0	0	0	0	0	0	0	0	0	0	0	0	0	0	0	0	0	0	0	0	0	0
OTU_5239	0	1	0	0	0	0	0	0	0	0	0	0	0	0	0	0	0	0	2	0	0	0	0	0
OTU_5157	0	1	0	0	0	0	0	0	0	0	0	0	0	0	0	0	0	0	0	0	0	0	0	0
OTU_3510	0	1	0	0	0	0	0	0	0	0	0	0	0	0	0	0	0	0	0	0	0	0	0	0
OTU_6006	0	1	0	0	0	0	0	0	0	0	0	0	0	1	0	0	0	0	0	0	0	0	0	0
OTU_5399	0	1	0	0	0	0	0	0	0	0	0	0	0	0	0	0	0	0	0	0	0	0	0	0
OTU_4766	0	1	0	0	0	0	0	0	0	0	0	0	0	0	1	0	0	0	0	0	0	0	0	0
OTU_5400	0	1	0	0	0	0	0	0	0	0	0	0	0	0	0	0	0	0	0	0	0	0	0	0
OTU_4138	0	1	0	0	0	0	0	0	0	0	0	0	0	4	0	0	0	0	0	0	0	0	0	0
OTU_6169	0	1	0	0	0	0	0	0	0	0	0	0	0	0	0	0	0	0	0	0	0	0	0	0
OTU_3788	0	1	9	0	0	0	0	0	0	0	0	0	2	1	0	0	0	0	0	0	0	0	0	1
OTU_2591	0	1	0	0	0	0	0	0	0	0	0	0	0	0	0	0	0	0	0	0	0	0	0	0
OTU_1466	0	1	3	0	0	14	0	0	1	0	0	2	0	1	4	0	0	0	0	0	0	0	0	0
OTU_2064	0	1	0	0	0	0	0	0	0	0	0	0	0	2	0	0	0	0	0	0	0	0	0	0
OTU_2956	0	1	0	0	0	0	0	0	0	0	0	0	0	1	0	0	0	0	0	0	1	0	0	0
OTU_6532	0	1	0	0	0	0	0	0	0	0	0	0	0	0	0	0	0	0	0	0	0	0	0	0
OTU_4429	0	1	0	0	0	0	0	0	0	0	0	0	0	2	0	0	0	0	0	0	0	0	0	0
OTU_1024	0	1	26	0	10	12	0	0	3	0	0	0	0	0	27	11	12	13	0	0	3	0	0	0
OTU_4146	0	0	28	7	31	54	0	0	7	1	4	3	0	0	49	13	15	61	0	5	3	0	15	2
OTU_4832	0	1	2	0	0	0	0	0	0	0	0	0	0	1	0	0	0	0	0	0	0	0	0	0
OTU_235	0	0	32	0	2	0	0	0	11	0	0	0	0	0	1	0	3	0	0	0	0	0	2	0
OTU_1445	0	0	1	0	1	0	0	0	2	0	0	0	0	1	0	0	0	0	0	0	0	0	0	0
OTU_2429	0	0	6	0	0	0	0	0	0	0	0	0	0	0	2	0	0	0	0	0	0	0	0	0
OTU_1517	0	0	8	0	0	0	0	0	10	0	0	0	0	0	11	0	0	0	0	0	24	0	0	0
OTU_3432	0	0	1	0	0	4	0	0	0	0	0	0	0	0	0	7	0	6	0	0	0	0	0	0
OTU_1913	0	0	2	0	0	1	0	0	0	0	0	0	0	0	0	1	0	0	0	0	0	0	0	0
OTU_1652	0	0	2	0	0	0	0	0	0	0	0	0	0	0	0	0	3	1	0	0	0	0	0	0
OTU_2853	0	0	6	0	0	0	0	0	5	0	0	0	0	0	12	0	0	1	0	0	0	0	0	0
OTU_141	0	0	46	3	57	60	0	0	1	0	1	7	0	0	76	21	46	82	0	0	0	1	18	4
OTU_2336	0	0	7	5	0	0	0	0	1	0	0	0	0	0	6	9	0	0	0	0	3	0	0	0
OTU_1350	0	0	6	0	0	0	0	0	0	0	0	0	0	0	0	0	0	0	0	0	0	0	0	0
OTU_187	0	0	22	2	0	6	0	0	2	0	0	0	0	0	43	7	0	0	0	0	1	0	0	0
OTU_422	0	0	15	0	0	1	0	0	30	2	0	3	0	0	0	0	0	0	0	0	6	0	4	0
OTU_1015	0	0	9	0	0	0	0	0	0	0	0	0	0	0	1	0	0	0	0	0	0	0	0	0
OTU_1029	0	0	2	0	0	0	0	0	0	0	0	0	0	0	1	0	0	0	0	0	8	0	0	0
OTU_561	0	0	7	0	0	0	0	1	38	0	0	0	0	0	4	0	0	0	0	0	15	0	0	0
OTU_1914	0	0	2	0	0	1	0	0	5	1	0	0	0	0	0	0	0	0	0	0	2	0	1	1
OTU_1168	0	0	27	2	8	15	0	1	12	0	0	0	0	1	31	8	1	0	0	1	12	0	0	3
OTU_577	0	0	9	7	13	1	0	0	0	0	0	0	0	0	22	26	4	6	0	0	0	0	0	0
OTU_1383	0	0	3	0	0	2	0	0	0	0	0	0	0	0	1	0	0	0	0	0	0	0	0	0
OTU_838	0	0	3	0	9	2	0	0	2	0	0	0	0	0	4	0	0	4	0	0	0	0	1	0
OTU_916	0	0	24	0	3	4	0	0	0	0	0	0	0	0	19	0	1	1	0	0	0	0	0	0
OTU_5164	0	0	5	0	0	1	0	0	1	0	0	0	0	0	0	0	0	2	0	0	0	0	0	0
OTU_65	0	0	21	0	5	17	0	0	4	0	0	1	0	0	2	84	1	32	0	0	0	0	0	0
OTU_195	0	0	16	1	12	11	0	0	21	0	3	0	0	0	9	10	0	7	0	0	0	0	11	2
OTU_882	0	0	1	3	0	1	0	0	0	0	0	0	0	0	5	0	0	5	0	0	0	0	0	0
OTU_4925	0	0	3	0	0	0	0	0	0	0	0	0	0	0	0	0	0	1	0	0	0	0	0	0
OTU_2078	0	0	2	0	0	0	0	0	0	0	0	0	0	0	0	0	0	0	0	0	0	0	0	0
OTU_931	0	0	2	4	2	0	0	0	0	0	0	0	0	1	1	5	3	0	0	0	0	0	0	0
OTU_444	0	0	6	0	2	2	0	0	0	0	0	0	0	0	11	0	0	1	0	0	0	0	0	0
OTU_435	0	0	8	0	0	0	0	0	5	0	0	0	0	2	0	0	0	0	0	0	0	0	0	0
OTU_1227	0	0	17	2	13	19	0	0	1	0	0	1	0	1	10	11	8	22	0	0	0	0	3	0
OTU_139	0	0	6	9	24	6	0	0	4	0	0	0	0	0	16	22	25	8	0	0	0	0	0	0
OTU_6339	0	0	6	0	1	0	0	0	0	0	0	0	0	0	1	1	0	1	0	0	0	0	1	0
OTU_785	0	0	18	0	0	0	0	0	4	0	0	0	0	0	2	0	0	0	0	0	0	0	0	0
OTU_831	0	0	6	0	0	1	0	0	0	0	0	0	0	0	1	0	0	0	0	0	0	0	0	0
OTU_890	0	0	1	0	0	0	0	0	0	0	0	0	0	0	4	0	0	0	0	0	0	0	0	0
OTU_2202	0	0	2	0	0	0	0	0	0	0	0	0	0	0	0	0	0	1	0	0	2	0	0	0
OTU_309	0	0	10	1	4	5	0	0	0	0	0	0	0	0	8	15	4	6	0	0	0	0	2	0
OTU_1643	0	0	1	0	2	0	0	0	0	0	0	0	0	0	1	1	0	0	0	0	0	0	0	0
OTU_562	0	0	3	3	2	4	0	0	3	0	0	0	0	0	8	9	0	0	0	0	0	0	0	0
OTU_1911	0	0	5	1	0	1	0	0	0	0	0	0	0	0	2	0	0	0	0	0	0	0	0	0
OTU_222	0	0	5	0	0	0	0	0	2	0	0	0	0	0	0	1	0	31	0	0	0	0	0	0
OTU_485	0	0	12	0	0	0	0	0	0	0	0	0	0	0	0	0	0	0	0	0	0	0	0	0
OTU_2806	0	0	3	0	0	0	0	0	0	0	0	0	0	0	1	0	0	0	0	0	0	0	0	0
OTU_1474	0	0	10	0	0	5	0	0	0	0	0	3	0	0	0	0	0	0	0	1	0	0	0	0
OTU_993	0	0	4	0	0	0	0	0	0	0	0	0	0	0	3	0	0	0	0	0	3	0	0	0
OTU_1502	0	0	7	0	0	0	0	0	0	0	0	0	0	0	1	0	0	0	0	0	0	0	0	0
OTU_4543	0	0	5	63	9	0	0	0	3	9	0	0	0	0	0	0	2	0	0	5	3	0	3	0
OTU_6321	0	0	8	0	1	7	0	0	0	0	0	0	0	1	0	0	1	1	0	0	0	0	0	1
OTU_199	0	0	13	0	0	0	0	0	31	0	0	0	0	0	0	0	0	0	0	8	0	0	0	0
OTU_156	0	0	2	0	3	0	0	0	0	0	0	0	0	1	7	3	0	1	0	0	25	0	0	0
OTU_4006	0	0	4	0	4	2	0	0	0	0	0	0	0	0	0	0	2	5	0	0	0	0	0	0
OTU_1948	0	0	7	1	0	0	0	0	0	0	0	0	0	0	0	0	0	4	0	0	0	0	0	0
OTU_6612	0	0	6	0	0	0	0	0	0	0	0	0	0	1	2	0	0	0	0	0	0	0	0	0
OTU_118	0	0	2	3	0	16	0	0	71	1	8	50	0	0	0	0	0	1	0	0	81	0	45	72
OTU_847	0	0	3	0	1	8	0	0	0	1	0	0	0	0	0	0	1	2	0	0	0	0	2	3
OTU_771	0	0	3	1	0	1	0	0	12	0	0	0	0	0	3	0	0	0	0	0	2	0	0	0
OTU_3552	0	0	8	0	0	0	0	0	0	0	0	0	0	0	0	0	0	0	0	0	0	0	0	0
OTU_1171	0	0	1	0	6	1	0	0	1	0	0	1	0	0	1	7	5	0	9	0	0	0	0	3
OTU_2609	0	0	5	0	0	0	0	0	1	0	0	0	0	1	4	0	0	0	0	0	0	0	0	0
OTU_1491	0	0	4	0	0	2	0	0	0	0	0	0	0	1	9	6	4	0	0	0	0	0	0	0
OTU_434	0	0	9	19	57	90	0	0	3	0	0	0	0	0	5	67	32	68	0	0	1	0	1	13
OTU_4706	0	0	4	0	0	0	0	0	0	0	0	0	0	0	4	1	0	0	0	0	0	0	0	0
OTU_294	0	0	33	38	82	51	0	0	1	0	0	0	0	0	68	152	66	69	0	0	1	0	0	5
OTU_378	0	0	27	1	8	11	0	0	6	0	1	1	0	1	12	5	6	15	0	0	0	0	0	7
OTU_963	0	0	6	0	0	2	0	0	43	0	1	0	0	0	0	0	1	0	0	0	13	0	9	5
OTU_828	0	0	18	2	9	10	0	0	16	1	0	0	0	0	19	4	7	10	0	0	7	0	22	14
OTU_456	0	0	4	0	0	2	0	0	0	0	0	0	0	0	17	0	0	0	0	0	0	0	0	0
OTU_2593	0	0	3	0	0	0	0	0	0	0	0	0	0	0	0	0	0	0	0	0	0	0	0	0
OTU_1536	0	0	6	0	0	0	0	0	0	0	0	0	0	0	5	0	0	0	0	0	0	0	0	0
OTU_4092	0	0	1	0	0	0	0	0	0	0	0	0	0	0	0	0	0	0	0	0	2	0	0	0
OTU_1440	0	0	1	0	0	0	0	0	6	7	0	0	0	0	0	0	0	0	0	3	15	0	0	0
OTU_359	0	0	3	0	9	2	0	0	0	0	0	0	0	2	11	4	4	1	0	0	0	0	0	0
OTU_2516	0	0	1	1	0	1	0	0	1	0	0	0	0	0	2	0	0	2	0	0	0	0	0	0
OTU_3447	0	0	1	0	0	0	0	0	0	0	0	0	0	0	1	0	0	0	0	0	0	0	0	0
OTU_6150	0	0	7	0	0	1	0	0	0	0	0	0	0	0	1	0	0	0	0	0	1	0	0	0
OTU_43	0	0	2	14	160	10	0	0	2	1	36	16	0	0	8	8	5	0	0	0	4	4	0	0
OTU_4686	0	0	5	0	1	1	0	0	0	0	0	0	0	0	5	6	0	1	0	0	0	0	0	0
OTU_4497	0	0	1	0	0	0	0	0	0	0	0	0	0	0	0	0	0	0	0	0	0	0	0	0
OTU_555	0	0	9	0	1	3	0	0	29	0	3	0	0	0	8	5	0	0	0	0	31	0	1	3
OTU_5806	0	0	2	0	0	0	0	0	0	0	0	0	0	0	0	0	0	0	0	0	0	0	0	0
OTU_5567	0	0	1	0	0	0	0	0	0	0	0	0	0	0	0	0	0	0	0	0	0	0	0	0
OTU_301	0	0	6	1	0	7	0	0	4	0	0	0	0	0	5	3	2	22	0	0	4	0	8	13
OTU_652	0	0	29	0	0	1	0	0	2	0	0	0	0	0	2	2	1	0	0	0	1	0	0	0
OTU_4836	0	0	1	0	0	0	0	0	0	0	0	0	0	0	0	0	0	0	0	0	0	0	0	0
OTU_2147	0	0	2	0	0	0	0	0	18	5	0	0	0	0	0	0	0	0	0	2	11	0	0	0
OTU_2808	0	0	5	0	0	0	0	0	0	0	0	0	0	0	0	0	0	0	0	0	0	0	0	0
OTU_1143	0	0	4	0	1	1	0	0	0	0	0	0	0	0	2	0	1	1	0	0	0	0	0	0
OTU_3242	0	0	1	0	0	0	0	0	0	0	0	0	0	4	0	0	0	0	0	0	0	0	0	0
OTU_6186	0	0	3	0	0	0	0	0	0	0	0	0	0	0	0	0	0	0	0	0	0	0	0	0
OTU_1173	0	0	9	0	0	0	0	0	0	0	0	0	0	3	6	0	0	0	0	0	0	0	0	0
OTU_746	0	0	9	7	22	10	0	0	0	0	0	0	0	0	27	7	7	1	0	0	0	0	0	0
OTU_4769	0	0	4	0	0	0	0	0	0	0	0	0	0	1	2	0	0	0	0	0	0	0	0	0
OTU_4505	0	0	3	0	0	1	0	0	0	0	0	0	0	1	0	0	0	1	0	0	0	0	0	0
OTU_1316	0	0	2	0	0	5	0	0	8	0	0	1	0	0	2	0	0	2	0	1	9	0	8	19
OTU_3631	0	0	1	0	0	0	0	0	0	0	0	0	0	0	0	0	2	0	0	0	0	0	0	0
OTU_1893	0	0	3	0	0	0	0	0	0	0	0	0	0	0	0	0	0	0	0	0	0	0	0	0
OTU_2645	0	0	1	0	0	0	0	0	0	0	0	0	0	0	0	0	0	0	0	0	0	0	0	0
OTU_471	0	0	4	0	4	4	0	0	0	0	0	0	0	0	1	0	0	0	0	0	6	0	0	0
OTU_4285	0	0	4	0	1	4	0	0	1	0	0	0	0	0	14	0	0	3	0	0	0	0	0	0
OTU_2211	0	0	1	0	0	0	0	0	1	0	0	0	0	1	1	1	1	0	0	0	0	0	0	0
OTU_1996	0	0	3	0	0	0	0	0	0	0	0	0	0	0	0	0	0	0	0	0	0	0	0	0
OTU_5156	0	0	2	0	0	0	0	0	0	0	0	0	0	0	0	0	0	0	0	0	0	0	0	0
OTU_1671	0	0	2	0	0	0	0	0	0	0	0	0	0	0	1	0	0	0	0	0	0	0	0	1
OTU_268	0	0	6	7	10	9	0	0	0	0	0	1	0	0	6	21	17	6	0	0	11	0	0	13
OTU_6213	0	0	1	0	0	0	0	0	0	0	0	0	0	0	0	0	0	0	0	0	0	0	0	0
OTU_2398	0	0	1	86	0	2	0	0	0	0	0	0	0	0	0	30	1	29	0	0	0	0	0	2
OTU_535	0	0	22	5	21	80	0	0	0	0	0	0	0	1	32	23	18	107	0	0	0	0	0	0
OTU_969	0	0	3	3	2	0	0	0	0	0	0	0	0	0	2	4	5	2	0	0	0	0	0	0
OTU_3626	0	0	1	0	0	0	0	0	0	0	0	0	0	2	1	0	0	0	0	0	0	0	0	0
OTU_393	0	0	28	5	34	61	0	0	0	0	0	1	0	0	34	16	21	42	0	0	0	0	0	0
OTU_295	0	0	6	0	0	3	0	0	61	5	4	0	0	0	12	0	0	0	0	5	67	0	0	1
OTU_4828	0	0	1	0	0	0	0	0	0	0	0	0	0	0	1	0	0	0	0	0	0	0	0	0
OTU_1699	0	0	5	0	0	0	0	0	0	0	0	0	0	8	0	0	0	0	0	0	0	0	0	0
OTU_4541	0	0	2	0	0	1	0	0	0	0	0	0	0	0	0	0	0	0	0	0	0	0	0	0
OTU_6631	0	0	16	0	4	5	0	0	0	0	0	0	0	2	12	1	2	3	0	0	0	0	0	0
OTU_3682	0	0	20	1	7	47	0	0	7	0	0	0	0	0	24	5	13	15	0	1	1	0	12	9
OTU_2376	0	0	3	0	0	3	0	0	2	0	0	0	0	0	2	0	2	2	0	1	1	0	1	0
OTU_445	0	0	12	2	4	8	0	0	9	0	0	0	0	14	13	6	4	24	0	0	3	0	0	0
OTU_4325	0	0	5	0	0	0	0	0	0	0	0	0	0	0	0	0	0	0	0	0	0	0	0	0
OTU_3423	0	0	2	0	1	0	0	0	0	0	0	0	0	0	2	0	0	0	0	0	0	0	0	0
OTU_1054	0	0	4	0	0	1	0	0	33	0	0	0	0	2	14	0	2	2	0	0	0	0	0	0
OTU_1355	0	0	15	0	0	3	0	0	0	0	0	0	0	0	7	3	3	3	0	0	0	0	0	0
OTU_1310	0	0	7	0	0	5	0	4	11	1	0	1	0	3	4	0	0	1	0	6	18	0	0	0
OTU_1641	0	0	5	1	2	0	0	0	0	0	0	0	0	0	1	0	0	0	0	0	0	0	0	0
OTU_1701	0	0	9	0	0	0	0	0	0	0	0	0	0	1	0	0	1	0	0	0	0	0	0	0
OTU_2512	0	0	3	0	0	0	0	0	0	0	1	0	0	0	0	1	0	2	0	0	0	0	1	1
OTU_290	0	0	8	2	14	15	0	0	0	0	0	0	0	0	8	6	5	6	0	0	0	0	0	1
OTU_720	0	0	6	0	1	0	0	0	1	0	0	0	0	0	2	0	0	0	0	1	0	0	0	0
OTU_569	0	0	3	0	0	0	0	0	0	0	0	0	0	0	5	0	0	6	0	0	0	0	0	0
OTU_1011	0	0	15	0	3	5	0	0	0	1	0	1	0	0	9	7	3	4	0	0	0	0	8	0
OTU_2008	0	0	2	0	3	0	0	0	0	0	0	0	0	0	1	0	0	0	0	0	0	0	0	0
OTU_1645	0	0	3	0	0	0	0	0	1	0	0	0	0	0	0	0	0	0	0	0	0	0	0	0
OTU_681	0	0	2	0	0	3	0	3	15	0	2	1	0	1	7	0	0	0	0	2	26	0	11	5
OTU_4215	0	0	1	0	0	0	0	0	0	0	0	0	0	0	0	0	0	0	0	0	0	0	0	0
OTU_6170	0	0	1	0	0	0	0	0	0	0	0	0	0	0	0	0	0	0	0	0	0	0	0	0
OTU_6191	0	0	3	0	3	5	0	0	6	0	0	0	0	0	4	0	0	3	0	0	6	0	2	1
OTU_1695	0	0	2	2	1	0	0	0	6	0	0	0	0	0	0	0	0	0	0	0	0	0	0	0
OTU_1048	0	0	5	0	0	11	0	0	0	0	0	0	0	0	0	0	0	0	0	0	0	0	0	0
OTU_299	0	0	1	3	0	8	0	1	3	0	0	4	1	0	0	2	2	4	0	5	4	0	22	9
OTU_2432	0	0	2	0	2	2	0	0	0	0	0	0	0	0	3	0	0	0	0	0	0	0	3	1
OTU_2642	0	0	1	0	0	0	0	0	0	0	0	0	0	0	0	0	0	0	0	0	0	0	0	0
OTU_2461	0	0	1	0	0	2	0	0	0	0	0	0	0	0	0	0	0	0	0	0	0	0	0	0
OTU_1018	0	0	1	0	0	0	0	0	0	0	0	0	1	0	0	0	0	0	4	0	0	0	0	4
OTU_5396	0	0	6	0	0	0	0	0	0	0	0	0	0	0	0	0	0	0	0	0	0	0	0	0
OTU_1214	0	0	9	2	3	12	0	2	5	2	0	0	0	2	16	0	3	16	0	1	0	0	0	0
OTU_4128	0	0	2	0	0	2	0	0	0	0	0	0	0	0	1	9	0	3	0	0	3	0	0	1
OTU_4322	0	0	1	0	0	0	0	0	0	0	0	0	0	0	0	0	0	0	0	0	0	0	0	0
OTU_2427	0	0	1	0	0	0	0	0	0	0	0	0	0	0	0	0	0	0	0	0	0	0	0	0
OTU_371	0	0	13	1	13	27	0	14	9	0	0	0	0	0	23	8	12	38	0	0	0	0	0	0
OTU_850	0	0	6	3	29	35	0	0	0	0	0	0	0	0	10	29	14	59	0	0	0	0	0	2
OTU_1711	0	0	14	1	1	5	0	0	0	1	0	0	0	1	12	1	2	7	0	0	0	0	0	0
OTU_345	0	0	19	3	2	6	0	0	42	0	0	0	0	0	26	0	3	3	0	3	15	0	8	0
OTU_3231	0	0	2	0	0	1	0	0	0	0	0	0	0	1	1	0	0	0	0	0	0	0	0	0
OTU_307	0	0	8	0	14	0	0	9	20	0	2	0	0	12	0	0	3	1	9	108	0	0	4	0
OTU_677	0	0	2	0	8	5	0	0	2	0	0	0	0	3	4	0	1	5	1	3	0	0	5	17
OTU_5247	0	0	1	0	0	0	0	1	3	0	0	0	0	0	1	0	0	0	0	6	2	0	0	0
OTU_5092	0	0	4	1	0	0	0	0	0	0	0	0	6	5	1	0	0	0	0	0	0	0	0	0
OTU_855	0	0	1	0	7	1	0	0	0	0	0	0	0	0	3	0	0	0	0	0	0	0	0	0
OTU_3506	0	0	1	0	0	0	0	0	0	0	0	0	0	0	0	0	0	0	0	0	0	0	0	0
OTU_2647	0	0	2	0	0	0	0	0	0	0	0	0	0	0	0	0	0	0	0	0	2	0	0	0
OTU_2210	0	0	1	0	0	0	0	0	0	0	0	0	0	0	0	0	0	0	0	0	0	0	0	0
OTU_2254	0	0	1	0	0	0	0	0	0	0	0	0	0	0	0	0	0	0	0	0	0	0	0	0
OTU_1838	0	0	1	0	0	1	0	0	0	0	0	0	0	0	3	0	0	4	0	0	0	0	0	0
OTU_3146	0	0	13	1	3	8	0	0	0	0	0	0	0	0	7	5	3	9	0	0	0	0	0	0
OTU_191	0	0	8	1	0	0	0	2	63	19	0	0	0	0	3	4	0	0	0	1	72	0	0	1
OTU_3545	0	0	7	0	0	0	0	0	0	0	0	0	0	0	0	0	0	0	0	0	0	0	0	0
OTU_1841	0	0	1	0	0	0	0	0	0	0	3	0	0	0	0	0	0	0	0	0	7	0	0	0
OTU_3159	0	0	2	0	0	0	0	0	1	0	0	0	0	0	0	0	0	0	0	0	7	0	0	0
OTU_994	0	0	2	0	0	1	0	0	0	0	0	0	8	0	8	0	0	0	0	0	0	0	0	0
OTU_3795	0	0	4	1	0	1	0	0	0	0	0	0	0	0	0	0	0	0	0	0	0	0	0	0
OTU_4835	0	0	3	0	0	0	0	0	0	0	0	0	0	0	0	0	0	0	0	0	0	0	0	0
OTU_6045	0	0	1	0	0	0	0	0	0	0	0	0	0	0	0	0	0	0	0	2	0	0	0	0
OTU_1583	0	0	4	0	0	0	0	0	0	0	0	0	0	0	5	1	0	0	0	0	0	0	0	0
OTU_473	0	0	15	2	0	7	0	0	0	0	0	0	0	3	20	2	3	3	0	0	1	0	0	0
OTU_863	0	0	1	0	0	0	0	0	12	0	0	0	0	0	2	0	0	0	0	1	10	0	10	1
OTU_526	0	0	7	0	1	0	0	0	0	0	0	0	0	1	4	3	0	2	0	0	0	0	0	0
OTU_4397	0	0	1	0	0	0	0	0	0	0	0	0	0	0	0	0	0	0	0	0	0	0	0	0
OTU_5159	0	0	1	0	0	0	0	0	0	0	0	0	0	0	0	0	0	0	0	0	0	0	0	0
OTU_2866	0	0	3	0	0	1	0	0	0	0	0	0	0	0	2	0	1	0	0	0	0	0	0	0
OTU_1027	0	0	2	0	0	1	0	0	1	0	0	0	0	1	0	0	0	0	0	4	0	0	0	0
OTU_3848	0	0	1	0	0	0	1	0	0	0	0	0	0	1	1	0	0	0	0	0	0	0	0	0
OTU_2488	0	0	1	0	0	3	0	0	0	0	0	0	0	0	0	0	0	0	0	0	0	0	0	0
[truncated: 4,667 more rows]

## Sheet: Taxonomy
OTUId	Domain	Phylum	Class	Order	Family	Genus	Species	G3F50	G3F200	G3F1000	G3F2000	G3F3000	G3F4000	G3P50	G3P200	G3P1000	G3P2000	G3P3000	G3P4000	J5F50	J5F200	J5F1000	J5F2000	J5F3000	J5F4000	J5P50	J5P200	J5P1000	J5P2000	J5P3000	J5P4000
OTU_1177	Bacteria	Proteobacteria	AEGEAN-245	uncultured bacterium	uncultured bacterium	uncultured bacterium	uncultured bacterium	0	24	1	0	0	0	1	0	0	0	0	0	0	14	4	0	0	0	0	0	0	0	0	0
OTU_1356	Bacteria	Proteobacteria	AEGEAN-245	uncultured bacterium	uncultured bacterium	uncultured bacterium	uncultured bacterium	0	0	0	0	0	0	0	0	0	0	0	0	0	0	0	0	0	0	0	0	0	0	2	2
OTU_5576	Bacteria	Proteobacteria	AEGEAN-245	uncultured gamma proteobacterium	uncultured gamma proteobacterium	uncultured gamma proteobacterium	uncultured gamma proteobacterium	0	1	0	0	0	0	0	0	0	0	0	0	0	0	0	0	0	0	0	0	0	0	0	0
OTU_661	Bacteria	Proteobacteria	AEGEAN-245	uncultured bacterium	uncultured bacterium	uncultured bacterium	uncultured bacterium	3	51	12	0	4	1	0	0	0	0	0	0	1	42	15	1	0	0	0	2	0	0	0	0
OTU_1	Bacteria	Proteobacteria	Alphaproteobacteria	Rhizobiales	Methylobacteriaceae	Methylobacterium	uncultured bacterium	282	64	143	137	330	155	3	575	1966	766	496	1329	28	27	212	696	428	162	2257	1296	2568	0	1554	2432
OTU_1013	Bacteria	Proteobacteria	Alphaproteobacteria	Rickettsiales	Rickettsiaceae	uncultured	uncultured bacterium	0	0	0	0	0	6	0	0	0	0	0	0	0	0	0	0	0	0	0	0	0	0	0	0
OTU_1027	Bacteria	Proteobacteria	Alphaproteobacteria	Rhizobiales	Hyphomicrobiaceae	Unclassified	Unclassified	0	0	2	0	0	1	0	0	1	0	0	0	0	1	0	0	0	0	0	4	0	0	0	0
OTU_1031	Bacteria	Proteobacteria	Alphaproteobacteria	Rhodospirillales	Rhodospirillaceae	uncultured	uncultured alpha proteobacterium	0	0	3	0	8	11	0	0	0	0	3	0	0	0	2	1	4	12	0	0	1	0	10	3
OTU_1039	Bacteria	Proteobacteria	Alphaproteobacteria	Rhizobiales	Hyphomicrobiaceae	Pelagibacterium	uncultured bacterium	0	12	0	0	0	0	3	1	0	0	0	0	8	0	0	0	0	0	58	0	0	0	0	2
OTU_104	Bacteria	Proteobacteria	Alphaproteobacteria	Sphingomonadales	Erythrobacteraceae	Croceicoccus	unidentified marine bacterioplankton	0	0	8	0	2	0	1	0	4	0	0	0	7	0	5	1	0	0	8	38	2	0	0	3
OTU_105	Bacteria	Proteobacteria	Alphaproteobacteria	Rhodobacterales	Rhodobacteraceae	Unclassified	Unclassified	0	0	0	0	3	2	0	0	0	0	9	2	0	0	3	28	3	0	0	0	14	0	13	9
OTU_1053	Bacteria	Proteobacteria	Alphaproteobacteria	Rhodospirillales	Rhodospirillaceae	Magnetospira	uncultured alpha proteobacterium	0	2	0	0	0	0	0	0	4	0	0	0	0	6	0	0	0	0	0	0	0	0	0	0
OTU_106	Bacteria	Proteobacteria	Alphaproteobacteria	SAR11 clade	Surface 4	uncultured SAR11 cluster alpha proteobacterium	uncultured SAR11 cluster alpha proteobacterium	157	0	2	0	0	0	2	0	4	0	0	0	1	2	0	0	1	0	1	1	0	0	0	1
OTU_1068	Bacteria	Proteobacteria	Alphaproteobacteria	Rickettsiales	Holosporaceae	uncultured	uncultured alpha proteobacterium	0	4	0	0	0	0	0	0	0	0	0	0	0	0	0	0	0	0	0	0	0	0	0	0
OTU_107	Bacteria	Proteobacteria	Alphaproteobacteria	Rickettsiales	S25-593	uncultured bacterium	uncultured bacterium	0	32	22	0	6	2	0	0	8	0	0	0	0	9	36	0	1	15	0	0	0	0	0	2
OTU_1076	Bacteria	Proteobacteria	Alphaproteobacteria	Rickettsiales	Rickettsiaceae	Candidatus Cryptoprodotis	uncultured bacterium	0	0	0	0	0	0	0	0	3	0	0	0	0	0	0	0	0	0	3	0	0	0	0	0
OTU_1084	Bacteria	Proteobacteria	Alphaproteobacteria	Rickettsiales	Mitochondria	uncultured bacterium	uncultured bacterium	4	0	0	0	0	0	0	0	0	0	0	0	2	0	0	0	0	0	0	0	0	0	0	1
OTU_1087	Bacteria	Proteobacteria	Alphaproteobacteria	Sneathiellales	Sneathiellaceae	Sneathiella	uncultured bacterium	0	0	0	0	0	0	0	0	0	0	0	0	0	0	0	0	0	0	0	0	0	0	3	0
OTU_1093	Bacteria	Proteobacteria	Alphaproteobacteria	Rhizobiales	Hyphomicrobiaceae	Pelagibacterium	Pelagibacterium luteolum	0	0	0	0	0	0	0	0	0	0	0	0	5	0	0	0	0	0	0	0	0	0	0	0
OTU_11	Bacteria	Proteobacteria	Alphaproteobacteria	Caulobacterales	Hyphomonadaceae	Henriciella	Unclassified	2	6	1	4	329	27	1	1	0	0	37	7	0	0	8	117	755	108	0	2	5	0	83	40
OTU_1109	Bacteria	Proteobacteria	Alphaproteobacteria	Rickettsiales	SAR116 clade	uncultured bacterium	uncultured bacterium	6	0	0	0	0	0	0	0	1	1	2	0	0	0	0	0	0	0	0	0	0	0	0	0
OTU_1110	Bacteria	Proteobacteria	Alphaproteobacteria	Rickettsiales	SAR116 clade	unidentified marine bacterioplankton	unidentified marine bacterioplankton	4	0	2	0	0	1	0	0	0	0	0	0	0	1	0	0	0	0	0	0	0	0	0	0
OTU_1123	Bacteria	Proteobacteria	Alphaproteobacteria	Rickettsiales	Mitochondria	Unclassified	Unclassified	0	0	0	0	0	0	0	0	0	0	0	0	0	1	0	0	0	0	0	0	0	0	0	4
OTU_113	Bacteria	Proteobacteria	Alphaproteobacteria	Rhodobacterales	Rhodobacteraceae	Roseovarius	Roseobacter sp. LOB-8	1	6	0	2	0	0	2	4	1	0	0	0	9	0	0	0	0	0	63	0	3	0	0	0
OTU_1140	Bacteria	Proteobacteria	Alphaproteobacteria	Rhizobiales	Bradyrhizobiaceae	Bosea	uncultured bacterium	0	0	1	0	0	0	0	0	6	0	0	0	0	0	0	0	0	0	0	0	0	0	0	0
OTU_117	Bacteria	Proteobacteria	Alphaproteobacteria	Rickettsiales	S25-593	uncultured Rickettsiales bacterium	uncultured Rickettsiales bacterium	0	45	43	8	38	49	0	0	20	0	0	1	0	7	50	12	10	47	0	6	14	0	26	13
OTU_1170	Bacteria	Proteobacteria	Alphaproteobacteria	Rhodospirillales	Rhodospirillaceae	uncultured	uncultured Rhodospirillaceae bacterium	4	0	0	0	0	0	0	0	0	0	0	1	0	0	0	0	0	0	0	0	0	0	1	0
OTU_1178	Bacteria	Proteobacteria	Alphaproteobacteria	Rickettsiales	Mitochondria	Unclassified	Unclassified	0	0	0	0	0	0	0	0	0	0	0	0	0	0	0	0	0	0	4	0	0	0	0	0
OTU_1181	Bacteria	Proteobacteria	Alphaproteobacteria	Rickettsiales	Mitochondria	Unclassified	Unclassified	0	0	0	0	0	0	0	0	8	0	0	0	0	0	0	0	0	0	0	0	0	0	0	0
OTU_1182	Bacteria	Proteobacteria	Alphaproteobacteria	Unclassified	Unclassified	Unclassified	Unclassified	0	5	0	0	0	0	0	0	0	0	0	0	0	1	2	0	0	0	0	0	0	0	0	0
OTU_1184	Bacteria	Proteobacteria	Alphaproteobacteria	Rhodospirillales	Rhodospirillaceae	Defluviicoccus	uncultured bacterium	0	0	0	0	0	3	0	0	0	0	0	0	0	0	0	0	0	0	0	0	0	0	0	0
OTU_1194	Bacteria	Proteobacteria	Alphaproteobacteria	Rickettsiales	Mitochondria	Unclassified	Unclassified	0	0	0	0	0	4	0	0	0	0	0	0	0	1	0	0	0	0	0	0	5	0	5	0
OTU_1198	Bacteria	Proteobacteria	Alphaproteobacteria	Rhodobacterales	Rhodobacteraceae	Unclassified	Unclassified	0	0	0	0	0	0	0	0	0	0	0	0	0	0	0	0	0	0	0	4	0	0	0	0
OTU_12	Bacteria	Proteobacteria	Alphaproteobacteria	Rhizobiales	Phyllobacteriaceae	Hoeflea	uncultured Hoeflea sp.	7	1	0	176	265	374	0	8	7	85	68	506	0	0	5	197	190	88	0	0	0	2	105	161
OTU_120	Bacteria	Proteobacteria	Alphaproteobacteria	Rickettsiales	S25-593	uncultured Rickettsiales bacterium	uncultured Rickettsiales bacterium	1	28	8	0	19	23	0	2	11	0	0	0	0	4	7	10	11	8	0	1	1	0	7	5
OTU_1201	Bacteria	Proteobacteria	Alphaproteobacteria	Sphingomonadales	Sphingomonadaceae	Sphingomonas	Unclassified	0	0	0	1	2	0	0	0	0	0	1	0	0	0	3	0	0	0	0	0	0	0	0	0
OTU_1206	Bacteria	Proteobacteria	Alphaproteobacteria	Rickettsiales	Rickettsiaceae	uncultured	uncultured bacterium	0	0	0	0	0	0	0	0	0	0	0	0	0	0	0	0	0	0	0	0	0	0	0	5
OTU_1218	Bacteria	Proteobacteria	Alphaproteobacteria	Rickettsiales	Mitochondria	Unclassified	Unclassified	0	0	0	0	0	0	0	0	0	0	0	0	0	0	0	0	0	0	13	0	0	0	0	0
OTU_1221	Bacteria	Proteobacteria	Alphaproteobacteria	Rickettsiales	Holosporaceae	uncultured	uncultured bacterium	0	0	0	0	0	0	0	0	0	0	0	0	2	0	0	0	0	0	4	0	0	0	0	0
OTU_124	Bacteria	Proteobacteria	Alphaproteobacteria	DB1-14	uncultured organism	uncultured organism	uncultured organism	0	0	1	0	23	0	0	0	0	0	0	0	0	0	0	7	47	0	0	0	0	0	0	0
OTU_1240	Bacteria	Proteobacteria	Alphaproteobacteria	Rickettsiales	S25-593	uncultured bacterium	uncultured bacterium	0	5	0	0	0	0	0	0	0	0	0	0	0	3	0	0	0	0	2	0	0	0	0	1
OTU_1244	Bacteria	Proteobacteria	Alphaproteobacteria	Rickettsiales	Mitochondria	Proteobacteria bacterium JGI 0000113-D06	Proteobacteria bacterium JGI 0000113-D06	0	0	0	0	0	0	0	0	2	0	0	0	0	0	0	0	0	0	0	0	2	0	0	0
OTU_1251	Bacteria	Proteobacteria	Alphaproteobacteria	Rickettsiales	Mitochondria	uncultured deep-sea bacterium	uncultured deep-sea bacterium	0	0	1	0	0	0	0	0	0	0	0	0	0	2	0	0	0	0	0	2	0	0	0	0
OTU_1266	Bacteria	Proteobacteria	Alphaproteobacteria	Rhodospirillales	Rhodospirillaceae	OM75 clade	uncultured bacterium	4	0	0	0	0	1	0	1	0	0	0	0	1	0	0	0	0	0	4	0	0	0	0	0
OTU_1267	Bacteria	Proteobacteria	Alphaproteobacteria	Rhodobacterales	Rhodobacteraceae	Amylibacter	uncultured alpha proteobacterium	53	4	4	3	1	4	1	19	28	0	2	1	0	2	0	0	1	0	113	6	0	0	1	0
OTU_1283	Bacteria	Proteobacteria	Alphaproteobacteria	Rickettsiales	Unclassified	Unclassified	Unclassified	0	0	0	0	0	0	0	3	0	0	0	0	0	0	0	0	0	0	0	2	0	0	0	0
OTU_1301	Bacteria	Proteobacteria	Alphaproteobacteria	Unclassified	Unclassified	Unclassified	Unclassified	0	0	0	0	0	0	2	0	0	0	0	0	0	0	0	0	0	0	3	0	0	0	0	0
OTU_1304	Bacteria	Proteobacteria	Alphaproteobacteria	Rickettsiales	Mitochondria	Unclassified	Unclassified	0	0	0	0	0	0	0	0	0	0	0	0	0	0	0	0	0	0	0	0	0	0	0	6
OTU_1318	Bacteria	Proteobacteria	Alphaproteobacteria	Rhodospirillales	Rhodospirillaceae	Unclassified	Unclassified	0	3	0	0	0	0	0	1	0	0	0	0	0	2	0	0	0	0	0	4	0	0	0	0
OTU_1320	Bacteria	Proteobacteria	Alphaproteobacteria	SAR11 clade	Surface 1	Unclassified	Unclassified	0	2	3	1	0	2	0	0	0	0	0	0	0	5	0	0	0	0	0	0	0	0	0	2
OTU_1322	Bacteria	Proteobacteria	Alphaproteobacteria	Rhodobacterales	Rhodobacteraceae	Rubellimicrobium	uncultured bacterium	0	0	0	0	0	0	0	0	0	0	0	0	0	0	0	0	0	0	0	4	0	0	0	0
OTU_1325	Bacteria	Proteobacteria	Alphaproteobacteria	Rickettsiales	Rickettsiaceae	uncultured	uncultured bacterium	0	0	0	0	0	0	0	0	0	0	0	0	0	0	5	0	0	0	0	0	0	0	0	0
OTU_1336	Bacteria	Proteobacteria	Alphaproteobacteria	DB1-14	Unclassified	Unclassified	Unclassified	0	0	0	0	1	0	0	0	0	0	0	0	0	0	0	0	5	0	0	0	0	0	0	0
OTU_1337	Bacteria	Proteobacteria	Alphaproteobacteria	Rickettsiales	Rickettsiaceae	Unclassified	Unclassified	0	0	0	0	0	0	0	0	0	0	0	0	0	0	0	0	0	0	4	0	0	0	0	0
OTU_1354	Bacteria	Proteobacteria	Alphaproteobacteria	SAR11 clade	Deep 1	Unclassified	Unclassified	2	142	106	7	20	52	0	1	62	3	1	0	0	83	118	17	12	17	0	30	30	0	10	14
OTU_1361	Bacteria	Proteobacteria	Alphaproteobacteria	Rickettsiales	Mitochondria	Unclassified	Unclassified	0	0	0	0	0	0	0	3	0	0	0	0	0	0	0	0	0	0	0	1	0	0	0	0
OTU_1371	Bacteria	Proteobacteria	Alphaproteobacteria	Rhodospirillales	Acetobacteraceae	Roseomonas	uncultured bacterium	0	0	0	0	0	0	0	0	0	0	0	0	0	0	0	0	0	0	0	0	5	0	0	0
OTU_1378	Bacteria	Proteobacteria	Alphaproteobacteria	Unclassified	Unclassified	Unclassified	Unclassified	0	0	0	0	0	0	0	0	0	0	0	0	0	0	0	4	4	0	0	0	0	0	0	0
OTU_1383	Bacteria	Proteobacteria	Alphaproteobacteria	Rhodospirillales	Rhodospirillaceae	Unclassified	Unclassified	0	0	3	0	0	2	0	0	0	0	0	0	0	0	1	0	0	0	0	0	0	0	0	0
OTU_1388	Bacteria	Proteobacteria	Alphaproteobacteria	Rickettsiales	Mitochondria	uncultured deep-sea bacterium	uncultured deep-sea bacterium	0	0	0	0	0	0	0	0	0	0	0	0	0	0	0	0	0	0	0	0	0	0	0	3
OTU_1393	Bacteria	Proteobacteria	Alphaproteobacteria	Rhodospirillales	Acetobacteraceae	Roseomonas	Roseomonas frigidaquae	0	0	0	0	0	0	0	0	0	0	0	0	0	0	0	0	0	0	0	0	2	0	0	0
OTU_1400	Bacteria	Proteobacteria	Alphaproteobacteria	Unclassified	Unclassified	Unclassified	Unclassified	0	0	0	0	0	0	0	0	6	0	0	0	0	0	0	0	0	0	0	0	0	0	0	0
OTU_1405	Bacteria	Proteobacteria	Alphaproteobacteria	Rhodobacterales	Rhodobacteraceae	Maribius	Maribius sp. MOLA 401	0	0	0	4	31	5	0	0	0	1	24	20	0	0	0	6	4	2	0	0	9	0	2	5
OTU_141	Bacteria	Proteobacteria	Alphaproteobacteria	Rhodospirillales	Rhodospirillaceae	uncultured	uncultured alpha proteobacterium	0	0	46	3	57	60	0	0	1	0	1	7	0	0	76	21	46	82	0	0	0	1	18	4
OTU_1414	Bacteria	Proteobacteria	Alphaproteobacteria	Rickettsiales	Mitochondria	uncultured bacterium	uncultured bacterium	0	0	0	0	0	0	0	1	0	0	0	0	0	0	0	0	0	0	2	0	0	0	0	0
OTU_1427	Bacteria	Proteobacteria	Alphaproteobacteria	DB1-14	uncultured bacterium	uncultured bacterium	uncultured bacterium	0	0	0	0	0	0	0	0	0	0	0	0	0	0	0	0	0	0	0	0	0	0	0	5
OTU_1431	Bacteria	Proteobacteria	Alphaproteobacteria	Rhodobacterales	Rhodobacteraceae	Unclassified	Unclassified	0	0	0	10	25	0	0	0	0	0	8	0	0	0	1	0	0	0	0	0	0	0	0	0
OTU_1442	Bacteria	Proteobacteria	Alphaproteobacteria	Rickettsiales	Mitochondria	Unclassified	Unclassified	0	0	0	0	1	0	0	0	4	0	0	0	1	0	0	0	0	0	3	0	0	0	0	0
OTU_145	Bacteria	Proteobacteria	Alphaproteobacteria	Rhodobacterales	Rhodobacteraceae	Roseovarius	uncultured organism	2	5	2	3	8	5	0	6	10	0	7	5	0	3	0	10	8	2	1	10	2	2	3	11
OTU_1450	Bacteria	Proteobacteria	Alphaproteobacteria	Rhodospirillales	Acetobacteraceae	Roseomonas	Roseomonas genomospecies 4	0	0	0	0	0	0	0	0	0	0	0	0	0	0	0	0	0	0	0	0	0	0	0	2
OTU_146	Bacteria	Proteobacteria	Alphaproteobacteria	Rhodospirillales	Rhodospirillaceae	Defluviicoccus	uncultured Rhodospirillales bacterium	0	16	34	3	5	12	0	0	1	0	0	0	0	5	22	6	3	9	0	0	0	0	0	0
OTU_1470	Bacteria	Proteobacteria	Alphaproteobacteria	Rickettsiales	Rickettsiaceae	Unclassified	Unclassified	0	0	0	0	0	0	0	0	2	0	0	0	0	0	0	0	0	0	0	0	0	0	0	0
OTU_1488	Bacteria	Proteobacteria	Alphaproteobacteria	SAR11 clade	Deep 1	Unclassified	Unclassified	0	0	0	0	0	5	0	0	0	0	0	0	0	0	1	0	0	0	0	0	0	0	0	0
OTU_149	Bacteria	Proteobacteria	Alphaproteobacteria	Rhodospirillales	Rhodospirillaceae	uncultured	uncultured alpha proteobacterium	0	0	0	0	14	8	0	0	10	5	2	1	0	0	4	2	6	31	0	0	3	0	6	5
OTU_1495	Bacteria	Proteobacteria	Alphaproteobacteria	DB1-14	uncultured organism	uncultured organism	uncultured organism	0	0	0	0	1	0	0	0	0	0	0	0	0	0	0	0	0	5	0	0	0	0	0	0
OTU_1498	Bacteria	Proteobacteria	Alphaproteobacteria	OCS116 clade	Unclassified	Unclassified	Unclassified	0	0	0	0	0	0	0	0	0	0	0	0	0	0	0	0	0	0	0	0	0	2	0	0
OTU_1499	Bacteria	Proteobacteria	Alphaproteobacteria	Rickettsiales	Mitochondria	uncultured bacterium	uncultured bacterium	0	0	0	0	0	0	0	0	1	0	0	0	0	0	0	0	0	0	0	3	0	0	0	0
OTU_153	Bacteria	Proteobacteria	Alphaproteobacteria	DB1-14	Unclassified	Unclassified	Unclassified	35	2	2	4	1	0	1	0	0	0	2	1	2	0	0	2	0	0	0	0	0	0	0	0
OTU_1535	Bacteria	Proteobacteria	Alphaproteobacteria	Rickettsiales	Rickettsiales Incertae Sedis	Candidatus Captivus	uncultured bacterium	0	0	2	0	0	0	0	0	2	0	0	0	0	0	0	0	0	0	0	0	0	0	0	0
OTU_1541	Bacteria	Proteobacteria	Alphaproteobacteria	Unclassified	Unclassified	Unclassified	Unclassified	0	0	0	0	0	0	0	0	0	0	0	0	0	0	0	0	0	0	0	0	0	0	0	2
OTU_1545	Bacteria	Proteobacteria	Alphaproteobacteria	Rickettsiales	Mitochondria	Unclassified	Unclassified	3	0	0	0	0	0	0	0	0	0	0	0	0	0	0	0	0	0	0	0	0	0	0	0
OTU_1549	Bacteria	Proteobacteria	Alphaproteobacteria	OCS116 clade	uncultured OCS116 cluster bacterium	uncultured OCS116 cluster bacterium	uncultured OCS116 cluster bacterium	2	0	0	0	0	1	0	0	2	0	0	0	0	0	0	0	0	0	0	0	0	0	0	0
OTU_1556	Bacteria	Proteobacteria	Alphaproteobacteria	Unclassified	Unclassified	Unclassified	Unclassified	0	0	0	0	0	0	0	0	0	0	0	0	0	0	0	0	0	0	0	2	0	0	0	0
OTU_156	Bacteria	Proteobacteria	Alphaproteobacteria	Unclassified	Unclassified	Unclassified	Unclassified	0	0	2	0	3	0	0	0	0	0	0	0	0	1	7	3	0	1	0	0	25	0	0	0
OTU_1576	Bacteria	Proteobacteria	Alphaproteobacteria	Rickettsiales	Mitochondria	Unclassified	Unclassified	0	0	0	0	0	0	0	0	8	0	0	0	0	0	0	0	0	0	0	0	0	0	0	0
OTU_1578	Bacteria	Proteobacteria	Alphaproteobacteria	Rickettsiales	Mitochondria	Unclassified	Unclassified	0	1	0	0	1	0	0	0	1	0	0	0	6	0	0	0	0	0	13	0	0	0	0	0
OTU_158	Bacteria	Proteobacteria	Alphaproteobacteria	Rhodospirillales	AT-s3-44	uncultured bacterium	uncultured bacterium	0	32	57	5	23	49	0	0	0	0	0	0	0	22	90	11	11	30	0	2	0	0	5	8
OTU_1589	Bacteria	Proteobacteria	Alphaproteobacteria	Rhodospirillales	Rhodospirillaceae	Nisaea	Nisaea denitrificans	0	0	0	0	0	0	0	0	0	0	0	0	0	0	0	0	0	0	5	0	0	0	0	1
OTU_159	Bacteria	Proteobacteria	Alphaproteobacteria	Unclassified	Unclassified	Unclassified	Unclassified	0	0	0	1	1	14	0	0	0	0	0	0	0	0	3	6	1	37	0	0	0	0	0	0
OTU_1592	Bacteria	Proteobacteria	Alphaproteobacteria	Caulobacterales	Hyphomonadaceae	uncultured	Unclassified	0	0	0	1	0	2	0	0	0	0	0	0	0	0	1	0	4	4	0	0	0	4	0	1
OTU_1593	Bacteria	Proteobacteria	Alphaproteobacteria	Unclassified	Unclassified	Unclassified	Unclassified	4	0	0	0	0	0	0	0	0	0	0	0	2	0	0	0	0	0	0	0	0	0	0	0
OTU_1596	Bacteria	Proteobacteria	Alphaproteobacteria	Rickettsiales	Rickettsiaceae	Rickettsia	uncultured Rickettsia sp.	0	0	0	0	0	0	0	0	0	0	0	1	0	0	0	0	0	0	1	0	0	0	1	0
OTU_16	Bacteria	Proteobacteria	Alphaproteobacteria	Rhodobacterales	Rhodobacteraceae	Sulfitobacter	Unclassified	12	26	15	327	156	2	15	8	12	0	1	1	10	0	0	3	22	13	52	8	15	1	9	6
OTU_1603	Bacteria	Proteobacteria	Alphaproteobacteria	Rickettsiales	Rickettsiales Incertae Sedis	Candidatus Captivus	Unclassified	0	0	0	0	0	0	0	0	2	0	0	0	0	0	0	0	0	0	0	0	0	0	0	0
OTU_1610	Bacteria	Proteobacteria	Alphaproteobacteria	Rickettsiales	Mitochondria	Unclassified	Unclassified	0	0	0	0	0	0	0	0	1	0	0	0	0	0	0	0	0	0	0	3	0	0	0	0
OTU_1616	Bacteria	Proteobacteria	Alphaproteobacteria	Rhizobiales	Phyllobacteriaceae	Pseudahrensia	uncultured bacterium	0	0	0	0	0	0	0	0	0	2	0	0	0	0	0	0	0	0	0	1	0	0	0	0
OTU_1621	Bacteria	Proteobacteria	Alphaproteobacteria	Rickettsiales	Mitochondria	Unclassified	Unclassified	1	0	0	0	0	0	1	0	0	0	0	0	1	0	0	0	0	0	0	0	0	0	0	0
OTU_1639	Bacteria	Proteobacteria	Alphaproteobacteria	Rickettsiales	Rickettsiales Incertae Sedis	Candidatus Captivus	Unclassified	0	0	0	0	0	0	0	0	0	0	0	0	0	0	0	0	0	0	2	0	0	0	0	0
OTU_1642	Bacteria	Proteobacteria	Alphaproteobacteria	Rickettsiales	LWSR-14	Sinorickettsia chlamys	Sinorickettsia chlamys	0	0	0	0	0	4	0	0	0	0	0	0	0	0	0	2	3	1	0	0	0	1	0	1
OTU_1653	Bacteria	Proteobacteria	Alphaproteobacteria	Rhizobiales	Unclassified	Unclassified	Unclassified	0	1	0	0	0	0	0	0	1	0	0	0	1	0	0	0	0	0	7	0	0	0	0	0
OTU_166	Bacteria	Proteobacteria	Alphaproteobacteria	Sphingomonadales	Unclassified	Unclassified	Unclassified	1	2	1	1	3	24	1	3	1	1	0	3	0	1	0	2	0	22	2	8	0	0	0	1
OTU_1678	Bacteria	Proteobacteria	Alphaproteobacteria	Rickettsiales	Mitochondria	uncultured deep-sea bacterium	uncultured deep-sea bacterium	0	0	0	0	0	0	0	0	0	0	0	0	0	0	0	0	0	2	0	0	0	0	0	0
OTU_1679	Bacteria	Proteobacteria	Alphaproteobacteria	Rickettsiales	Rickettsiales Incertae Sedis	Candidatus Lariskella	uncultured Rickettsiales bacterium	0	0	0	0	0	0	0	0	0	0	0	0	0	0	0	0	0	0	0	3	0	0	0	0
OTU_1680	Bacteria	Proteobacteria	Alphaproteobacteria	Rhodobacterales	Rhodobacteraceae	uncultured	Unclassified	0	0	1	0	0	0	0	3	0	0	0	0	0	0	0	0	0	0	0	0	0	0	0	0
OTU_1681	Bacteria	Proteobacteria	Alphaproteobacteria	Rhodospirillales	Rhodospirillaceae	Defluviicoccus	uncultured Rhodospirillales bacterium	0	3	1	0	0	0	0	0	0	0	0	0	0	1	1	0	0	1	0	0	0	0	0	0
OTU_1689	Bacteria	Proteobacteria	Alphaproteobacteria	Rhodobacterales	Rhodobacteraceae	Donghicola	uncultured bacterium	0	0	0	1	16	4	0	0	1	0	1	8	0	0	1	0	3	3	0	0	4	0	0	4
OTU_169	Bacteria	Proteobacteria	Alphaproteobacteria	SAR11 clade	Surface 3	uncultured bacterium	uncultured bacterium	54	0	0	0	0	0	7	0	0	0	0	0	7	1	0	0	0	2	12	0	0	0	1	0
OTU_1697	Bacteria	Proteobacteria	Alphaproteobacteria	Rhodobacterales	Rhodobacteraceae	Unclassified	Unclassified	2	2	0	7	23	39	1	0	1	3	4	6	0	3	2	21	42	107	2	1	1	2	8	27
OTU_17	Bacteria	Proteobacteria	Alphaproteobacteria	Rhizobiales	Methylobacteriaceae	Methylobacterium	Methylobacterium radiotolerans	175	15	42	24	164	98	1	27	75	22	24	33	0	0	1	12	50	12	38	27	57	0	50	46
OTU_171	Bacteria	Proteobacteria	Alphaproteobacteria	Rhodobacterales	Rhodobacteraceae	uncultured	unidentified marine bacterioplankton	95	3	5	0	4	14	26	17	12	0	0	1	61	8	1	1	1	3	74	7	0	0	0	4
OTU_1723	Bacteria	Proteobacteria	Alphaproteobacteria	Rhodospirillales	Rhodospirillaceae	uncultured organism	uncultured organism	0	0	1	0	0	0	0	0	4	0	0	0	0	0	0	0	0	0	0	0	0	0	0	0
OTU_1725	Bacteria	Proteobacteria	Alphaproteobacteria	Rickettsiales	Rickettsiaceae	uncultured	uncultured bacterium	0	0	0	0	0	0	0	0	0	0	0	0	0	0	2	0	0	0	0	0	0	0	0	0
OTU_1728	Bacteria	Proteobacteria	Alphaproteobacteria	Sphingomonadales	Sphingomonadaceae	Novosphingobium	bacterium 081648	0	0	0	0	0	0	0	0	0	0	0	0	0	0	0	0	0	0	0	0	0	0	2	1
OTU_1729	Bacteria	Proteobacteria	Alphaproteobacteria	Sphingomonadales	Sphingomonadaceae	Parasphingopyxis	uncultured bacterium	0	0	1	5	1	1	0	1	12	0	0	0	0	2	0	0	1	6	8	107	0	0	0	0
OTU_174	Bacteria	Proteobacteria	Alphaproteobacteria	Rhodobacterales	Rhodobacteraceae	Ruegeria	Ruegeria pomeroyi DSS-3	0	0	0	0	1	1	0	1	0	1	0	3	0	0	2	4	0	0	0	2	27	0	2	8
OTU_1748	Bacteria	Proteobacteria	Alphaproteobacteria	Rickettsiales	Mitochondria	Unclassified	Unclassified	0	0	0	0	0	0	0	0	0	0	0	0	0	0	0	0	0	0	7	0	0	0	0	0
OTU_1749	Bacteria	Proteobacteria	Alphaproteobacteria	Rickettsiales	Mitochondria	Proteobacteria bacterium JGI 0000113-D06	Proteobacteria bacterium JGI 0000113-D06	0	0	0	0	0	0	0	0	0	0	0	0	0	0	0	0	0	0	0	0	0	0	0	3
OTU_1753	Bacteria	Proteobacteria	Alphaproteobacteria	Rickettsiales	LWSR-14	Unclassified	Unclassified	0	0	0	0	0	0	0	0	0	0	0	0	0	0	0	0	0	0	0	0	0	0	3	0
OTU_1762	Bacteria	Proteobacteria	Alphaproteobacteria	Rickettsiales	Rickettsiales Incertae Sedis	Candidatus Lariskella	uncultured alpha proteobacterium	0	0	0	0	0	0	0	0	0	0	0	0	0	0	0	0	0	0	3	0	0	0	0	0
OTU_1767	Bacteria	Proteobacteria	Alphaproteobacteria	Rhodospirillales	Rhodospirillaceae	uncultured	Unclassified	0	3	0	0	0	0	0	0	0	0	0	0	0	0	0	0	0	0	0	0	0	0	0	1
OTU_1784	Bacteria	Proteobacteria	Alphaproteobacteria	Rickettsiales	Mitochondria	Phaeodactylum tricornutum	Phaeodactylum tricornutum	0	0	0	0	0	0	0	0	0	0	0	0	0	0	0	0	0	0	0	3	0	0	0	0
OTU_1790	Bacteria	Proteobacteria	Alphaproteobacteria	Rhodobacterales	Rhodobacteraceae	Unclassified	Unclassified	0	0	0	0	0	0	0	0	0	0	0	0	0	0	0	0	0	0	7	0	0	0	0	0
OTU_1791	Bacteria	Proteobacteria	Alphaproteobacteria	Rickettsiales	Rickettsiaceae	uncultured	Unclassified	0	0	0	0	0	0	0	0	0	0	0	0	0	0	0	0	0	0	3	0	0	0	0	0
OTU_1796	Bacteria	Proteobacteria	Alphaproteobacteria	DB1-14	uncultured organism	uncultured organism	uncultured organism	0	0	0	0	0	0	0	0	0	0	0	0	0	0	0	0	0	0	4	0	0	0	0	0
OTU_1798	Bacteria	Proteobacteria	Alphaproteobacteria	Rhizobiales	Bradyrhizobiaceae	Bosea	uncultured alpha proteobacterium	0	0	0	0	0	0	0	0	7	0	0	0	0	0	0	0	0	0	0	0	0	0	0	0
OTU_180	Bacteria	Proteobacteria	Alphaproteobacteria	DB1-14	uncultured bacterium	uncultured bacterium	uncultured bacterium	13	0	2	0	1	0	0	0	3	12	0	0	1	0	0	0	0	0	25	0	0	0	0	0
OTU_1807	Bacteria	Proteobacteria	Alphaproteobacteria	Rhizobiales	Hyphomicrobiaceae	Pelagibacterium	uncultured microorganism	0	1	0	1	1	0	1	0	0	0	0	0	4	0	0	0	0	0	4	0	0	0	0	0
OTU_1820	Bacteria	Proteobacteria	Alphaproteobacteria	Rickettsiales	Rickettsiales Incertae Sedis	Candidatus Lariskella	uncultured proteobacterium	0	0	0	0	0	0	1	0	0	0	0	0	0	0	0	0	0	0	2	0	0	0	2	0
OTU_183	Bacteria	Proteobacteria	Alphaproteobacteria	DB1-14	uncultured bacterium	uncultured bacterium	uncultured bacterium	0	0	0	0	0	0	0	0	2	0	0	0	0	1	0	0	0	0	1	34	1	0	0	0
OTU_1834	Bacteria	Proteobacteria	Alphaproteobacteria	Caulobacterales	Hyphomonadaceae	Algimonas	Unclassified	0	0	0	2	5	0	0	0	0	0	3	0	0	0	0	0	3	0	0	0	0	0	1	1
OTU_1837	Bacteria	Proteobacteria	Alphaproteobacteria	Caulobacterales	Caulobacteraceae	Phenylobacterium	uncultured alpha proteobacterium	3	0	1	0	0	0	0	0	1	0	0	4	0	0	0	0	0	0	0	0	0	0	0	0
OTU_1849	Bacteria	Proteobacteria	Alphaproteobacteria	Rhizobiales	Phyllobacteriaceae	Unclassified	Unclassified	0	0	0	0	0	0	0	0	0	0	0	0	0	0	0	0	0	0	0	0	0	5	0	0
OTU_1859	Bacteria	Proteobacteria	Alphaproteobacteria	Rickettsiales	Mitochondria	Unclassified	Unclassified	0	0	0	0	0	0	0	1	0	0	0	0	0	0	0	0	0	0	0	0	0	0	0	4
OTU_1865	Bacteria	Proteobacteria	Alphaproteobacteria	Unclassified	Unclassified	Unclassified	Unclassified	0	0	0	0	1	0	0	0	0	0	0	0	0	0	1	0	0	0	0	0	0	0	0	0
OTU_1870	Bacteria	Proteobacteria	Alphaproteobacteria	Rhodospirillales	Rhodospirillaceae	AEGEAN-169 marine group	Unclassified	0	3	0	0	0	0	0	0	0	0	0	0	0	1	0	0	0	0	0	0	0	0	0	0
OTU_1872	Bacteria	Proteobacteria	Alphaproteobacteria	Rickettsiales	Mitochondria	Unclassified	Unclassified	1	0	0	0	0	0	0	0	0	0	0	0	0	0	0	0	0	0	0	0	0	0	0	3
OTU_1876	Bacteria	Proteobacteria	Alphaproteobacteria	Rhodospirillales	Rhodospirillaceae	AEGEAN-169 marine group	Unclassified	0	20	9	3	2	7	0	0	2	0	0	0	0	15	9	1	0	2	0	2	0	0	0	0
OTU_1884	Bacteria	Proteobacteria	Alphaproteobacteria	Rhodobacterales	Rhodobacteraceae	uncultured	unidentified marine bacterioplankton	8	0	0	0	2	0	0	0	0	0	0	0	3	0	0	0	0	0	5	0	0	0	0	3
OTU_1895	Bacteria	Proteobacteria	Alphaproteobacteria	Rickettsiales	Mitochondria	Unclassified	Unclassified	0	0	0	0	0	0	0	0	0	0	0	0	0	0	0	1	0	0	0	0	0	0	1	5
OTU_1898	Bacteria	Proteobacteria	Alphaproteobacteria	Caulobacterales	Caulobacteraceae	Phenylobacterium	uncultured bacterium	0	0	0	0	0	0	0	0	0	0	0	0	0	0	0	0	0	0	0	0	0	0	2	0
OTU_1905	Bacteria	Proteobacteria	Alphaproteobacteria	DB1-14	uncultured bacterium	uncultured bacterium	uncultured bacterium	0	0	0	0	0	0	0	0	0	0	0	0	0	0	0	0	0	0	0	0	0	0	3	0
OTU_1917	Bacteria	Proteobacteria	Alphaproteobacteria	Unclassified	Unclassified	Unclassified	Unclassified	0	0	0	0	0	4	0	0	0	0	0	0	0	0	2	0	0	0	0	0	0	0	0	0
OTU_193	Bacteria	Proteobacteria	Alphaproteobacteria	DB1-14	uncultured bacterium	uncultured bacterium	uncultured bacterium	0	0	0	0	5	2	0	0	0	0	0	0	0	0	0	3	12	10	0	0	0	0	0	0
OTU_1932	Bacteria	Proteobacteria	Alphaproteobacteria	Rickettsiales	Mitochondria	Unclassified	Unclassified	0	0	0	0	0	0	0	0	2	0	0	0	0	0	0	0	0	0	0	0	0	0	0	0
OTU_1941	Bacteria	Proteobacteria	Alphaproteobacteria	DB1-14	uncultured Rhizobiales bacterium	uncultured Rhizobiales bacterium	uncultured Rhizobiales bacterium	0	0	0	0	1	0	0	0	0	0	0	0	0	0	0	0	0	0	0	0	2	0	0	0
OTU_1942	Bacteria	Proteobacteria	Alphaproteobacteria	Rhodospirillales	AT-s3-44	uncultured bacterium	uncultured bacterium	0	2	2	0	0	0	0	0	0	0	0	0	0	0	3	0	3	0	0	0	0	0	0	0
OTU_1953	Bacteria	Proteobacteria	Alphaproteobacteria	Rhodobacterales	Rhodobacteraceae	Ruegeria	uncultured Rhodobacteraceae bacterium	1	1	0	3	0	3	0	5	0	1	0	1	0	1	1	1	1	0	11	1	0	0	0	0
OTU_1956	Bacteria	Proteobacteria	Alphaproteobacteria	SAR11 clade	uncultured alpha proteobacterium	uncultured alpha proteobacterium	uncultured alpha proteobacterium	1	0	2	0	0	0	0	0	0	0	0	0	0	0	0	0	0	0	0	0	0	0	0	0
OTU_1958	Bacteria	Proteobacteria	Alphaproteobacteria	Rhizobiales	Methylobacteriaceae	Methylobacterium	uncultured bacterium	22	3	3	15	23	10	0	40	128	47	32	60	6	1	17	53	21	10	167	100	161	0	82	163
OTU_1970	Bacteria	Proteobacteria	Alphaproteobacteria	Rhizobiales	KF-JG30-B3	uncultured alpha proteobacterium	uncultured alpha proteobacterium	0	0	2	0	1	0	0	0	0	0	0	0	0	0	1	0	1	0	0	0	0	0	0	0
OTU_1977	Bacteria	Proteobacteria	Alphaproteobacteria	Rhodobacterales	Rhodobacteraceae	Halocynthiibacter	uncultured bacterium	0	0	0	0	0	0	0	0	2	0	0	0	0	0	0	0	2	0	0	0	0	2	1	0
OTU_198	Bacteria	Proteobacteria	Alphaproteobacteria	Sphingomonadales	Erythrobacteraceae	Altererythrobacter	Altererythrobacter marinus	11	3	3	24	42	17	2	6	31	6	13	48	29	8	4	15	11	5	42	106	15	4	8	17
OTU_1982	Bacteria	Proteobacteria	Alphaproteobacteria	Rickettsiales	Mitochondria	Unclassified	Unclassified	0	1	0	0	0	0	0	1	0	0	0	0	0	0	0	0	0	0	0	0	0	0	0	0
OTU_1983	Bacteria	Proteobacteria	Alphaproteobacteria	SAR11 clade	Surface 1	uncultured marine microorganism	uncultured marine microorganism	0	22	19	1	1	8	0	0	14	0	4	0	0	11	26	5	1	1	0	1	10	0	3	1
OTU_1990	Bacteria	Proteobacteria	Alphaproteobacteria	Rhodospirillales	Rhodospirillaceae	AEGEAN-169 marine group	Unclassified	0	6	1	0	0	0	0	0	0	0	0	0	0	4	1	0	0	1	0	1	0	0	0	0
OTU_2	Bacteria	Proteobacteria	Alphaproteobacteria	Rhizobiales	Phyllobacteriaceae	Hoeflea	Unclassified	0	0	0	0	3	1	0	0	0	1	8	1	0	0	0	0	0	0	0	0	0	12495	0	0
OTU_20	Bacteria	Proteobacteria	Alphaproteobacteria	Rhizobiales	Bradyrhizobiaceae	Unclassified	Unclassified	380	4	5	1	19	10	0	0	4	0	3	9	4	3	18	85	52	17	16	12	5	0	12	0
OTU_2001	Bacteria	Proteobacteria	Alphaproteobacteria	Rhodospirillales	Rhodospirillaceae	Defluviicoccus	uncultured bacterium	0	0	0	0	0	0	0	0	0	0	0	0	0	0	0	2	3	0	0	0	0	0	0	2
OTU_2011	Bacteria	Proteobacteria	Alphaproteobacteria	Rhodobacterales	Rhodobacteraceae	Sulfitobacter	uncultured bacterium	6	48	37	317	127	44	21	44	83	43	19	36	10	5	8	12	22	10	76	141	15	3	12	4
OTU_2017	Bacteria	Proteobacteria	Alphaproteobacteria	Rickettsiales	Mitochondria	Unclassified	Unclassified	0	0	0	0	0	0	0	0	0	0	0	0	0	0	0	0	0	0	2	0	0	0	0	0
OTU_2018	Bacteria	Proteobacteria	Alphaproteobacteria	Rhizobiales	Rhodobiaceae	Rhodobium	uncultured bacterium	0	0	0	0	0	0	0	0	0	0	0	9	1	0	0	0	0	0	22	0	0	0	0	0
OTU_2019	Bacteria	Proteobacteria	Alphaproteobacteria	Rickettsiales	SAR116 clade	uncultured bacterium	uncultured bacterium	0	1	0	0	0	0	0	0	0	0	0	0	0	2	0	0	0	0	0	1	0	0	0	0
OTU_202	Bacteria	Proteobacteria	Alphaproteobacteria	OCS116 clade	uncultured marine bacterium	uncultured marine bacterium	uncultured marine bacterium	58	0	0	0	0	1	0	0	0	0	0	0	0	0	0	0	0	0	0	0	0	0	2	0
OTU_2026	Bacteria	Proteobacteria	Alphaproteobacteria	Rhizobiales	Phyllobacteriaceae	Pseudahrensia	uncultured bacterium	0	0	0	0	0	1	0	0	0	0	0	0	0	0	0	0	0	0	0	0	0	0	0	2
OTU_203	Bacteria	Proteobacteria	Alphaproteobacteria	Sphingomonadales	Sphingomonadaceae	Sphingopyxis	Novosphingobium sp. MBES04	0	1	0	0	3	11	0	0	0	0	0	9	1	0	0	0	0	9	2	0	0	0	1	13
OTU_2035	Bacteria	Proteobacteria	Alphaproteobacteria	Rickettsiales	Rickettsiaceae	uncultured	uncultured bacterium	0	0	0	0	0	0	0	0	0	0	0	0	0	0	0	0	0	0	0	5	0	0	0	0
OTU_204	Bacteria	Proteobacteria	Alphaproteobacteria	Rickettsiales	SAR116 clade	uncultured Rhodospirillaceae bacterium	uncultured Rhodospirillaceae bacterium	0	2	19	0	2	0	0	0	43	0	1	0	0	0	7	0	2	0	0	12	17	0	13	4
OTU_2057	Bacteria	Proteobacteria	Alphaproteobacteria	Rickettsiales	Mitochondria	Unclassified	Unclassified	0	0	0	0	0	0	1	0	0	0	0	0	1	0	0	0	0	0	0	0	0	0	0	0
OTU_2058	Bacteria	Proteobacteria	Alphaproteobacteria	SAR11 clade	marine metagenome	marine metagenome	marine metagenome	16	0	0	0	0	0	2	0	0	0	0	0	1	4	0	0	0	1	2	0	0	0	0	0
OTU_206	Bacteria	Proteobacteria	Alphaproteobacteria	Rhodobacterales	Rhodobacteraceae	uncultured	unidentified marine bacterioplankton	24	1	5	0	1	2	7	1	1	0	0	1	6	3	0	1	0	0	8	0	0	0	0	0
OTU_2068	Bacteria	Proteobacteria	Alphaproteobacteria	Rhodobacterales	Rhodobacteraceae	Unclassified	Unclassified	3	0	0	0	0	0	0	0	0	0	0	0	2	0	0	0	0	0	1	0	0	0	0	0
OTU_2072	Bacteria	Proteobacteria	Alphaproteobacteria	Rhizobiales	Rhodobiaceae	uncultured	uncultured bacterium	0	0	0	0	0	0	0	0	0	0	0	0	0	1	0	0	0	0	0	0	0	0	0	0
OTU_2075	Bacteria	Proteobacteria	Alphaproteobacteria	Rhizobiales	Phyllobacteriaceae	Unclassified	Unclassified	0	0	0	0	0	0	0	0	0	0	0	0	0	0	0	0	0	0	0	0	0	1	0	0
OTU_2076	Bacteria	Proteobacteria	Alphaproteobacteria	Rhizobiales	Phyllobacteriaceae	Unclassified	Unclassified	0	0	0	0	0	0	0	0	0	0	0	0	0	0	0	0	0	0	0	0	0	8	0	0
OTU_2079	Bacteria	Proteobacteria	Alphaproteobacteria	Rhodospirillales	Rhodospirillaceae	Unclassified	Unclassified	0	3	0	0	0	0	0	0	0	0	0	0	0	0	0	0	0	0	0	0	0	0	0	0
OTU_2083	Bacteria	Proteobacteria	Alphaproteobacteria	Rhizobiales	Phyllobacteriaceae	Unclassified	Unclassified	0	0	0	0	0	0	0	0	0	0	0	0	0	0	0	0	0	0	0	0	0	2	0	0
OTU_2084	Bacteria	Proteobacteria	Alphaproteobacteria	Rhodospirillales	Rhodospirillaceae	AEGEAN-169 marine group	alpha proteobacterium SCGC AB-629-F11	0	3	0	0	1	0	0	0	0	0	0	0	0	0	0	0	1	0	0	0	0	0	0	0
OTU_2088	Bacteria	Proteobacteria	Alphaproteobacteria	Rhizobiales	Phyllobacteriaceae	Unclassified	Unclassified	0	0	0	0	0	0	0	0	0	0	0	0	0	0	0	0	0	0	0	0	0	3	0	0
OTU_2092	Bacteria	Proteobacteria	Alphaproteobacteria	Rhodospirillales	Rhodospirillaceae	uncultured	uncultured nuHF2 cluster bacterium HF0770_42C12	0	1	0	0	0	0	0	0	0	0	0	0	0	0	0	0	0	0	0	0	0	0	0	0
OTU_2097	Bacteria	Proteobacteria	Alphaproteobacteria	Rhodobacterales	Rhodobacteraceae	Unclassified	Unclassified	1	0	0	7	3	0	0	0	1	0	0	0	0	0	0	0	18	0	0	1	1	1	18	0
OTU_210	Bacteria	Proteobacteria	Alphaproteobacteria	SAR11 clade	Deep 1	Unclassified	Unclassified	0	193	70	2	22	52	0	0	41	5	0	1	4	78	68	5	7	16	0	12	28	0	17	10
OTU_2105	Bacteria	Proteobacteria	Alphaproteobacteria	Rhodobacterales	Rhodobacteraceae	Unclassified	Unclassified	0	0	0	0	0	0	0	0	0	0	0	0	0	0	0	0	2	0	0	0	0	0	1	0
OTU_211	Bacteria	Proteobacteria	Alphaproteobacteria	DB1-14	Unclassified	Unclassified	Unclassified	0	0	0	36	0	0	0	0	0	0	0	0	0	0	0	0	0	0	0	0	0	0	0	0
OTU_2110	Bacteria	Proteobacteria	Alphaproteobacteria	Rhizobiales	Rhodobiaceae	Rhodobium	uncultured bacterium	0	0	0	0	0	0	0	0	0	0	0	0	0	0	0	0	0	0	3	0	0	0	0	0
OTU_2136	Bacteria	Proteobacteria	Alphaproteobacteria	Rhodobacterales	Rhodobacteraceae	Albimonas	Albimonas pacifica	0	0	0	0	0	4	0	0	0	0	1	7	0	0	0	3	0	3	0	0	15	0	1	0
OTU_214	Bacteria	Proteobacteria	Alphaproteobacteria	Rhodobacterales	Rhodobacteraceae	Unclassified	Unclassified	0	16	0	0	0	1	3	12	0	0	0	0	0	0	0	0	0	0	0	0	0	0	3	0
OTU_2149	Bacteria	Proteobacteria	Alphaproteobacteria	Rhizobiales	Methylobacteriaceae	Methylobacterium	Unclassified	0	0	0	0	0	0	0	0	1	0	0	0	0	0	0	0	0	0	0	0	0	0	3	1
OTU_215	Bacteria	Proteobacteria	Alphaproteobacteria	Rhizobiales	Rhodobiaceae	Rhodobium	unidentified marine bacterioplankton	1	0	0	0	0	0	1	0	0	0	0	0	2	0	0	0	0	0	44	1	0	0	0	0
OTU_2152	Bacteria	Proteobacteria	Alphaproteobacteria	Rickettsiales	Unclassified	Unclassified	Unclassified	1	0	0	0	0	0	0	0	0	0	0	0	0	0	0	0	0	0	0	0	0	0	0	1
OTU_2153	Bacteria	Proteobacteria	Alphaproteobacteria	SAR11 clade	Deep 1	Unclassified	Unclassified	0	0	0	0	0	2	0	0	0	0	0	0	0	0	0	0	0	1	0	0	0	0	0	1
OTU_2159	Bacteria	Proteobacteria	Alphaproteobacteria	SAR11 clade	Deep 1	Unclassified	Unclassified	0	39	10	0	2	7	0	0	14	0	0	0	0	23	20	2	1	3	0	2	2	0	1	2
OTU_2160	Bacteria	Proteobacteria	Alphaproteobacteria	SAR11 clade	Surface 1	marine metagenome	marine metagenome	0	0	0	0	0	0	0	0	0	0	0	0	0	0	0	0	0	0	0	0	0	0	0	1
OTU_2165	Bacteria	Proteobacteria	Alphaproteobacteria	Sphingomonadales	Erythrobacteraceae	Erythrobacter	unidentified	0	0	0	0	0	2	0	0	0	1	0	0	0	0	0	0	0	1	0	0	0	3	0	0
OTU_2177	Bacteria	Proteobacteria	Alphaproteobacteria	Rhizobiales	Unclassified	Unclassified	Unclassified	1	0	0	1	3	0	0	3	8	3	2	7	0	0	1	0	1	0	8	1	11	0	3	6
OTU_218	Bacteria	Proteobacteria	Alphaproteobacteria	Sphingomonadales	Sphingomonadaceae	uncultured	alpha proteobacterium JLT2015	0	1	0	0	0	0	5	3	1	0	0	0	8	0	0	0	0	0	18	1	0	0	0	0
OTU_2185	Bacteria	Proteobacteria	Alphaproteobacteria	Rhizobiales	Phyllobacteriaceae	Unclassified	Unclassified	0	0	0	0	0	0	0	0	0	0	0	0	0	0	0	0	0	0	0	0	0	2	0	0
OTU_2190	Bacteria	Proteobacteria	Alphaproteobacteria	Rhizobiales	Unclassified	Unclassified	Unclassified	0	0	0	0	0	0	0	0	0	0	0	0	0	0	0	0	0	0	0	0	0	1	0	0
OTU_2198	Bacteria	Proteobacteria	Alphaproteobacteria	SAR11 clade	Surface 1	Unclassified	Unclassified	0	3	0	0	0	0	0	0	0	0	0	0	0	0	0	0	0	0	0	0	0	0	0	0
OTU_2199	Bacteria	Proteobacteria	Alphaproteobacteria	SAR11 clade	Surface 1	Unclassified	Unclassified	0	1	0	0	0	0	0	0	0	0	0	0	0	0	0	0	0	0	0	0	0	0	0	0
OTU_22	Bacteria	Proteobacteria	Alphaproteobacteria	Sphingomonadales	Erythrobacteraceae	Croceicoccus	Unclassified	0	1	3	17	47	18	12	1	19	7	9	18	0	8	2	26	54	176	0	46	7	0	26	37
OTU_220	Bacteria	Proteobacteria	Alphaproteobacteria	Rickettsiales	Mitochondria	Unclassified	Unclassified	14	0	0	0	0	0	0	0	3	0	0	0	3	0	0	0	0	0	5	0	0	0	0	22
OTU_2207	Bacteria	Proteobacteria	Alphaproteobacteria	Rhodospirillales	AT-s3-44	uncultured marine bacterium	uncultured marine bacterium	0	0	0	0	0	0	0	0	0	0	0	0	0	1	0	0	0	0	0	0	0	0	0	0
OTU_2209	Bacteria	Proteobacteria	Alphaproteobacteria	SAR11 clade	Deep 1	uncultured marine bacterium	uncultured marine bacterium	0	1	0	0	0	0	0	0	1	0	0	0	0	2	0	0	0	0	0	0	0	0	0	0
OTU_2211	Bacteria	Proteobacteria	Alphaproteobacteria	SAR11 clade	Deep 1	Unclassified	Unclassified	0	0	1	0	0	0	0	0	1	0	0	0	0	1	1	1	1	0	0	0	0	0	0	0
OTU_222	Bacteria	Proteobacteria	Alphaproteobacteria	DB1-14	unidentified marine bacterioplankton	unidentified marine bacterioplankton	unidentified marine bacterioplankton	0	0	5	0	0	0	0	0	2	0	0	0	0	0	0	1	0	31	0	0	0	0	0	0
OTU_2221	Bacteria	Proteobacteria	Alphaproteobacteria	Rickettsiales	Mitochondria	Unclassified	Unclassified	0	0	0	0	0	0	0	0	0	0	0	0	0	0	0	0	0	0	2	0	0	0	0	0
OTU_2225	Bacteria	Proteobacteria	Alphaproteobacteria	Rhodospirillales	Rhodospirillaceae	Thalassospira	Unclassified	0	0	0	0	0	0	0	0	0	0	0	0	0	0	0	0	0	0	0	1	0	0	0	0
OTU_2236	Bacteria	Proteobacteria	Alphaproteobacteria	Rickettsiales	S25-593	uncultured Rickettsiales bacterium	uncultured Rickettsiales bacterium	1	4	2	0	0	0	0	0	0	0	0	0	0	2	3	1	0	0	0	0	4	0	0	0
OTU_2245	Bacteria	Proteobacteria	Alphaproteobacteria	Rickettsiales	S25-593	uncultured Rickettsiales bacterium	uncultured Rickettsiales bacterium	0	0	0	0	0	0	0	0	0	0	0	0	0	0	1	0	0	0	0	0	0	0	0	0
OTU_2254	Bacteria	Proteobacteria	Alphaproteobacteria	Rhodospirillales	Rhodospirillaceae	Unclassified	Unclassified	0	0	1	0	0	0	0	0	0	0	0	0	0	0	0	0	0	0	0	0	0	0	0	0
OTU_2265	Bacteria	Proteobacteria	Alphaproteobacteria	Rhodospirillales	Rhodospirillaceae	Defluviicoccus	Unclassified	0	0	4	0	0	11	0	0	0	0	0	0	0	0	1	1	5	1	0	0	0	0	0	0
OTU_2267	Bacteria	Proteobacteria	Alphaproteobacteria	Sphingomonadales	Unclassified	Unclassified	Unclassified	0	0	0	0	0	0	0	0	1	0	0	0	0	0	0	0	8	0	0	1	0	0	0	0
OTU_227	Bacteria	Proteobacteria	Alphaproteobacteria	Rhizobiales	Rhodobiaceae	Rhodobium	uncultured bacterium	0	0	0	0	0	0	0	0	0	0	0	0	0	0	0	0	0	0	35	0	0	0	0	0
OTU_2271	Bacteria	Proteobacteria	Alphaproteobacteria	Rhizobiales	Methylobacteriaceae	Methylobacterium	Unclassified	0	0	0	0	1	0	0	1	1	0	0	0	0	0	0	0	2	1	2	1	3	0	0	4
OTU_2281	Bacteria	Proteobacteria	Alphaproteobacteria	SAR11 clade	Unclassified	Unclassified	Unclassified	42	35	5	0	0	0	3	1	3	0	0	0	5	12	0	0	0	1	5	1	1	0	2	4
OTU_2286	Bacteria	Proteobacteria	Alphaproteobacteria	SAR11 clade	Surface 1	Unclassified	Unclassified	0	1	0	0	0	0	0	0	0	0	0	0	0	0	0	0	0	0	0	0	0	0	0	0
OTU_2290	Bacteria	Proteobacteria	Alphaproteobacteria	Rhizobiales	Methylobacteriaceae	Methylobacterium	Unclassified	0	0	0	0	0	0	0	1	1	0	0	0	0	0	0	0	0	0	0	1	2	0	0	0
OTU_2299	Bacteria	Proteobacteria	Alphaproteobacteria	Rickettsiales	Mitochondria	Unclassified	Unclassified	0	0	0	0	0	0	0	2	0	0	0	0	1	0	0	0	0	0	0	0	0	0	0	0
OTU_2310	Bacteria	Proteobacteria	Alphaproteobacteria	Rhodospirillales	Rhodospirillaceae	uncultured	Unclassified	0	1	0	0	0	0	0	0	0	0	0	0	0	1	0	0	0	0	0	0	0	0	0	0
OTU_2314	Bacteria	Proteobacteria	Alphaproteobacteria	SAR11 clade	Deep 1	Unclassified	Unclassified	0	0	0	0	0	0	0	0	0	0	0	0	0	0	1	0	0	0	0	0	0	0	0	0
OTU_2317	Bacteria	Proteobacteria	Alphaproteobacteria	SAR11 clade	Deep 1	Unclassified	Unclassified	0	0	0	0	1	1	0	0	0	0	0	0	0	0	1	0	0	0	0	0	0	0	0	0
OTU_2323	Bacteria	Proteobacteria	Alphaproteobacteria	Rhizobiales	Methylobacteriaceae	Methylobacterium	Unclassified	0	0	0	0	1	0	0	3	3	3	1	1	0	0	0	0	0	0	2	6	3	0	2	7
OTU_234	Bacteria	Proteobacteria	Alphaproteobacteria	Rickettsiales	Unclassified	Unclassified	Unclassified	0	0	0	0	0	0	0	0	0	0	0	0	0	0	0	0	0	0	22	0	0	0	0	2
OTU_2347	Bacteria	Proteobacteria	Alphaproteobacteria	Rhodobacterales	Rhodobacteraceae	Unclassified	Unclassified	0	0	0	0	0	0	0	0	0	0	0	0	0	0	0	0	1	0	0	0	0	0	0	0
OTU_235	Bacteria	Proteobacteria	Alphaproteobacteria	Rhodospirillales	Rhodospirillaceae	Magnetospira	Unclassified	0	0	32	0	2	0	0	0	11	0	0	0	0	0	1	0	3	0	0	0	0	0	2	0
OTU_2350	Bacteria	Proteobacteria	Alphaproteobacteria	Rickettsiales	SM2D12	Unclassified	Unclassified	0	0	0	0	0	0	0	0	0	0	0	0	0	0	2	0	0	0	0	0	0	0	0	0
OTU_236	Bacteria	Proteobacteria	Alphaproteobacteria	Rhodobacterales	Rhodobacteraceae	Unclassified	Unclassified	0	0	0	2	6	33	0	0	0	0	0	0	0	0	0	2	2	6	0	0	0	0	0	0
OTU_2361	Bacteria	Proteobacteria	Alphaproteobacteria	Rickettsiales	Mitochondria	Unclassified	Unclassified	0	0	0	0	0	0	0	0	8	0	0	0	0	0	0	0	0	0	0	0	0	0	0	0
OTU_2365	Bacteria	Proteobacteria	Alphaproteobacteria	SAR11 clade	Deep 1	uncultured organism	uncultured organism	0	24	21	1	3	10	0	0	19	0	1	0	0	13	51	7	3	14	0	17	23	0	1	9
OTU_2369	Bacteria	Proteobacteria	Alphaproteobacteria	Rhodospirillales	Rhodospirillaceae	Defluviicoccus	unidentified marine bacterioplankton	1	0	0	0	0	0	0	0	0	0	0	0	0	0	0	0	0	0	1	0	0	0	2	1
OTU_2371	Bacteria	Proteobacteria	Alphaproteobacteria	Sphingomonadales	Sphingomonadaceae	Unclassified	Unclassified	1	0	0	0	0	0	0	0	0	0	0	0	0	0	0	0	0	0	0	0	0	0	0	0
OTU_238	Bacteria	Proteobacteria	Alphaproteobacteria	DB1-14	Unclassified	Unclassified	Unclassified	0	0	0	0	0	3	0	0	0	0	0	0	0	0	2	0	0	30	0	0	0	0	0	0
OTU_2407	Bacteria	Proteobacteria	Alphaproteobacteria	Rhodospirillales	Rhodospirillaceae	Unclassified	Unclassified	0	0	0	0	0	0	0	0	0	0	0	1	0	0	0	0	0	0	0	0	0	0	0	0
OTU_2412	Bacteria	Proteobacteria	Alphaproteobacteria	Rickettsiales	Mitochondria	uncultured bacterium	uncultured bacterium	0	0	0	0	0	0	0	0	0	0	0	0	0	0	0	0	0	0	0	0	0	0	0	2
OTU_242	Bacteria	Proteobacteria	Alphaproteobacteria	E6aD10	Stappia sp. JL1095	Stappia sp. JL1095	Stappia sp. JL1095	0	0	1	0	0	4	0	0	10	0	0	33	0	0	1	6	1	3	0	19	0	0	1	22
OTU_2424	Bacteria	Proteobacteria	Alphaproteobacteria	Rhodospirillales	Rhodospirillaceae	Magnetospira	uncultured bacterium	0	0	0	0	0	0	0	0	0	0	0	0	0	0	0	0	0	0	0	0	0	0	0	3
OTU_2443	Bacteria	Proteobacteria	Alphaproteobacteria	Rhodobacterales	Rhodobacteraceae	Unclassified	Unclassified	0	0	0	0	0	1	0	0	0	0	0	2	0	0	0	0	0	0	0	0	0	0	0	0
OTU_2449	Bacteria	Proteobacteria	Alphaproteobacteria	Unclassified	Unclassified	Unclassified	Unclassified	0	0	0	0	0	0	0	0	1	0	0	0	0	0	0	0	0	0	0	0	0	0	0	0
OTU_245	Bacteria	Proteobacteria	Alphaproteobacteria	Caulobacterales	Hyphomonadaceae	Oceanicaulis	uncultured alpha proteobacterium	0	1	7	37	0	0	0	0	24	15	0	0	0	1	0	0	0	0	0	2	0	0	0	3
OTU_2454	Bacteria	Proteobacteria	Alphaproteobacteria	Rhodobacterales	Rhodobacteraceae	Unclassified	Unclassified	0	0	0	0	0	0	0	1	0	0	0	0	0	0	0	0	0	0	0	0	0	0	0	0
OTU_2458	Bacteria	Proteobacteria	Alphaproteobacteria	Rhodobacterales	Rhodobacteraceae	Unclassified	Unclassified	0	0	0	0	0	0	0	0	0	0	1	0	0	0	0	0	0	0	0	0	0	0	0	0
OTU_247	Bacteria	Proteobacteria	Alphaproteobacteria	Sphingomonadales	Sphingomonadaceae	Sphingomonas	iron-reducing bacterium enrichment culture clone HN54	1	0	0	0	0	2	0	5	5	0	0	6	0	0	0	0	0	0	3	0	0	0	1	0
OTU_2473	Bacteria	Proteobacteria	Alphaproteobacteria	Rhizobiales	Unclassified	Unclassified	Unclassified	0	0	0	0	0	0	0	0	1	0	0	1	0	0	0	0	0	1	0	0	1	0	0	0
OTU_2480	Bacteria	Proteobacteria	Alphaproteobacteria	Sphingomonadales	Erythrobacteraceae	Altererythrobacter	Unclassified	1	0	0	14	9	11	0	4	3	1	1	30	4	0	1	4	3	5	2	3	1	4	0	2
OTU_2484	Bacteria	Proteobacteria	Alphaproteobacteria	Rhodospirillales	Rhodospirillaceae	uncultured	uncultured alpha proteobacterium	0	2	0	0	0	3	0	0	0	0	0	0	0	1	0	0	0	2	0	0	0	0	0	0
OTU_2491	Bacteria	Proteobacteria	Alphaproteobacteria	Rhizobiales	Unclassified	Unclassified	Unclassified	0	0	0	0	0	0	0	0	0	0	0	2	0	0	0	0	0	0	0	0	0	0	0	0
OTU_2497	Bacteria	Proteobacteria	Alphaproteobacteria	Rhodobacterales	Rhodobacteraceae	Marivita	Unclassified	0	0	0	0	0	0	0	0	0	0	0	1	0	0	0	0	0	0	0	0	0	0	0	0
OTU_2503	Bacteria	Proteobacteria	Alphaproteobacteria	Sphingomonadales	Erythrobacteraceae	Unclassified	Unclassified	0	0	0	0	1	2	0	0	0	0	0	3	0	0	0	0	0	0	0	0	0	4	0	1
OTU_2506	Bacteria	Proteobacteria	Alphaproteobacteria	OCS116 clade	uncultured Pseudovibrio sp.	uncultured Pseudovibrio sp.	uncultured Pseudovibrio sp.	0	0	0	0	0	0	0	0	0	0	0	0	0	0	0	0	0	0	0	0	2	0	0	0
OTU_2509	Bacteria	Proteobacteria	Alphaproteobacteria	Rickettsiales	Mitochondria	Unclassified	Unclassified	0	0	0	0	0	0	0	0	0	0	0	0	0	0	0	0	0	0	0	2	0	0	0	0
OTU_2512	Bacteria	Proteobacteria	Alphaproteobacteria	Rickettsiales	SAR116 clade	Unclassified	Unclassified	0	0	3	0	0	0	0	0	0	0	1	0	0	0	0	1	0	2	0	0	0	0	1	1
OTU_2521	Bacteria	Proteobacteria	Alphaproteobacteria	Rhizobiales	uncultured	uncultured bacterium	uncultured bacterium	0	0	0	0	1	0	0	0	0	0	0	0	0	0	0	0	0	0	0	0	0	0	0	0
OTU_2529	Bacteria	Proteobacteria	Alphaproteobacteria	Rhodospirillales	Rhodospirillaceae	Defluviicoccus	uncultured bacterium	0	0	0	0	0	1	0	0	0	0	0	0	0	0	1	0	0	0	0	0	0	0	0	0
OTU_2535	Bacteria	Proteobacteria	Alphaproteobacteria	Rhodobacterales	Rhodobacteraceae	Unclassified	Unclassified	1	0	1	0	1	0	0	0	1	0	0	0	0	0	0	0	1	0	0	0	0	1	0	0
OTU_254	Bacteria	Proteobacteria	Alphaproteobacteria	SAR11 clade	Deep 1	uncultured bacterium	uncultured bacterium	2	204	78	3	2	2	0	11	23	0	0	0	2	84	65	4	3	0	0	14	27	0	1	2
OTU_2546	Bacteria	Proteobacteria	Alphaproteobacteria	Rickettsiales	Rickettsiaceae	Unclassified	Unclassified	0	1	0	0	0	0	0	0	0	0	0	0	0	0	0	0	0	0	0	0	0	0	0	0
OTU_2548	Bacteria	Proteobacteria	Alphaproteobacteria	Rhodospirillales	Rhodospirillaceae	AEGEAN-169 marine group	uncultured alpha proteobacterium	0	7	1	0	0	2	0	0	0	0	0	0	0	0	1	0	0	0	0	0	0	0	0	0
OTU_2549	Bacteria	Proteobacteria	Alphaproteobacteria	Rhodobacterales	Rhodobacteraceae	Unclassified	Unclassified	0	0	0	0	0	0	0	0	0	0	0	0	0	0	0	0	2	0	0	0	0	0	1	0
OTU_2553	Bacteria	Proteobacteria	Alphaproteobacteria	Rickettsiales	Mitochondria	Unclassified	Unclassified	0	0	0	0	0	0	0	0	0	0	0	0	0	0	0	0	0	0	3	0	0	0	0	1
OTU_2571	Bacteria	Proteobacteria	Alphaproteobacteria	Rhodobacterales	Rhodobacteraceae	Oceanicola	uncultured alpha proteobacterium	5	0	0	0	51	0	0	0	0	0	5	1	0	0	0	0	0	0	3	0	7	0	0	6
OTU_2575	Bacteria	Proteobacteria	Alphaproteobacteria	Sphingomonadales	Sphingomonadaceae	Unclassified	Unclassified	0	0	0	0	1	0	0	0	0	0	0	0	0	0	0	1	0	0	0	0	0	1	0	0
OTU_2579	Bacteria	Proteobacteria	Alphaproteobacteria	Rhodobacterales	Rhodobacteraceae	Unclassified	Unclassified	0	0	0	0	2	0	0	0	0	0	0	0	0	0	0	0	0	0	0	0	0	0	0	0
OTU_258	Bacteria	Proteobacteria	Alphaproteobacteria	E6aD10	uncultured Rhizobiales bacterium	uncultured Rhizobiales bacterium	uncultured Rhizobiales bacterium	0	0	0	0	0	0	0	0	0	0	0	0	0	0	0	0	0	0	0	26	0	0	0	0
OTU_2580	Bacteria	Proteobacteria	Alphaproteobacteria	Rickettsiales	LWSR-14	uncultured bacterium	uncultured bacterium	0	0	0	0	1	0	0	0	0	0	0	0	0	0	0	1	0	0	0	0	0	0	0	0
OTU_2592	Bacteria	Proteobacteria	Alphaproteobacteria	Sphingomonadales	Erythrobacteraceae	Erythrobacter	Unclassified	0	0	0	1	0	0	0	0	0	0	0	1	0	0	0	0	0	0	0	0	0	0	0	0
OTU_2597	Bacteria	Proteobacteria	Alphaproteobacteria	Rhodospirillales	Rhodospirillaceae	uncultured	uncultured deep-sea bacterium	0	1	0	0	0	0	0	0	0	0	0	0	0	0	0	0	0	0	0	0	0	0	0	0
OTU_26	Bacteria	Proteobacteria	Alphaproteobacteria	SAR11 clade	Deep 1	uncultured bacterium	uncultured bacterium	1	127	144	18	65	126	0	7	132	8	12	1	0	67	200	56	44	74	0	14	76	2	36	43
OTU_2600	Bacteria	Proteobacteria	Alphaproteobacteria	Rhodobacterales	Rhodobacteraceae	Unclassified	Unclassified	0	0	0	0	0	0	0	0	0	0	0	1	0	0	0	0	0	0	0	0	0	0	0	0
OTU_2602	Bacteria	Proteobacteria	Alphaproteobacteria	Sphingomonadales	Sphingomonadaceae	Sphingobium	Unclassified	0	0	0	7	0	7	0	0	0	0	0	0	0	0	0	0	0	0	0	0	0	0	0	0
OTU_261	Bacteria	Proteobacteria	Alphaproteobacteria	Rhodobacterales	Rhodobacteraceae	Albimonas	Albimonas pacifica	0	0	2	8	3	0	0	0	19	1	0	0	0	0	1	2	6	4	4	15	19	0	54	6
OTU_2611	Bacteria	Proteobacteria	Alphaproteobacteria	Unclassified	Unclassified	Unclassified	Unclassified	0	0	0	0	0	0	0	0	7	0	0	0	0	0	0	0	0	0	0	0	0	0	0	0
OTU_2618	Bacteria	Proteobacteria	Alphaproteobacteria	Rhizobiales	Unclassified	Unclassified	Unclassified	0	0	0	0	0	1	0	0	0	0	0	0	0	0	0	0	0	0	0	0	0	0	0	0
OTU_2626	Bacteria	Proteobacteria	Alphaproteobacteria	SAR11 clade	Deep 1	uncultured alpha proteobacterium	uncultured alpha proteobacterium	0	30	19	3	2	8	0	0	23	1	0	0	0	11	27	1	2	10	0	13	5	0	8	6
OTU_2632	Bacteria	Proteobacteria	Alphaproteobacteria	Unclassified	Unclassified	Unclassified	Unclassified	0	1	0	0	0	0	0	0	0	0	0	0	0	0	0	0	0	0	0	0	0	0	0	0
OTU_2641	Bacteria	Proteobacteria	Alphaproteobacteria	Rickettsiales	Mitochondria	Unclassified	Unclassified	0	0	0	0	0	0	0	6	0	0	0	0	0	0	0	0	0	0	3	0	0	0	0	0
OTU_2646	Bacteria	Proteobacteria	Alphaproteobacteria	Rhizobiales	Phyllobacteriaceae	Unclassified	Unclassified	0	0	0	0	0	0	0	0	0	0	0	0	0	0	0	0	0	0	0	0	0	3	0	0
OTU_2650	Bacteria	Proteobacteria	Alphaproteobacteria	Sphingomonadales	Sphingomonadaceae	Sphingomonas	Sphingomonas paucimobilis	0	0	0	0	0	0	0	1	0	0	0	0	0	0	0	0	0	0	0	0	1	0	0	0
OTU_2654	Bacteria	Proteobacteria	Alphaproteobacteria	Rhodospirillales	Rhodospirillaceae	Defluviicoccus	uncultured alpha proteobacterium	0	1	1	0	0	1	0	0	0	0	0	0	0	0	5	0	1	2	0	2	0	0	0	0
OTU_2663	Bacteria	Proteobacteria	Alphaproteobacteria	Rhizobiales	Unclassified	Unclassified	Unclassified	0	0	0	0	0	0	0	0	0	0	0	0	0	0	0	0	0	0	0	0	0	1	0	0
OTU_2666	Bacteria	Proteobacteria	Alphaproteobacteria	Rhodospirillales	Rhodospirillaceae	uncultured	uncultured deep-sea bacterium	0	0	0	0	0	4	0	0	0	0	0	0	0	0	0	0	1	5	0	0	0	0	0	1
OTU_2669	Bacteria	Proteobacteria	Alphaproteobacteria	Rickettsiales	LWSR-14	Sinorickettsia chlamys	Sinorickettsia chlamys	0	0	0	0	1	1	0	0	0	1	0	0	0	0	1	3	4	0	0	0	0	0	0	0
OTU_2671	Bacteria	Proteobacteria	Alphaproteobacteria	Rickettsiales	Unclassified	Unclassified	Unclassified	0	0	0	0	0	0	0	0	0	0	0	0	0	0	0	0	0	0	0	0	0	0	0	2
OTU_2680	Bacteria	Proteobacteria	Alphaproteobacteria	Rhizobiales	Rhodobiaceae	uncultured	uncultured bacterium	0	0	0	0	0	0	0	0	0	0	0	0	0	0	0	0	0	0	0	0	0	3	0	0
OTU_2682	Bacteria	Proteobacteria	Alphaproteobacteria	Sphingomonadales	Sphingomonadaceae	Sphingobium	Unclassified	0	0	0	0	0	0	0	0	0	0	0	0	0	0	0	0	0	0	0	0	0	0	0	1
OTU_2686	Bacteria	Proteobacteria	Alphaproteobacteria	Rhodobacterales	Rhodobacteraceae	Unclassified	Unclassified	0	0	0	0	1	1	0	0	0	0	0	0	0	0	0	0	0	0	1	0	0	0	0	0
OTU_269	Bacteria	Proteobacteria	Alphaproteobacteria	Rickettsiales	SAR116 clade	uncultured bacterium	uncultured bacterium	40	13	3	0	0	1	0	11	9	0	0	1	9	8	0	0	0	1	26	9	0	0	0	1
OTU_2695	Bacteria	Proteobacteria	Alphaproteobacteria	Rickettsiales	Mitochondria	Unclassified	Unclassified	0	0	0	0	0	0	0	0	0	0	0	0	0	0	0	0	0	0	0	0	0	0	0	1
OTU_2699	Bacteria	Proteobacteria	Alphaproteobacteria	Rickettsiales	Mitochondria	uncultured bacterium	uncultured bacterium	1	0	0	0	0	0	0	2	2	0	0	0	0	0	0	0	0	0	0	0	0	0	0	0
OTU_2701	Bacteria	Proteobacteria	Alphaproteobacteria	Rickettsiales	Mitochondria	Unclassified	Unclassified	0	0	0	0	0	0	0	0	1	0	0	0	0	0	0	0	0	0	0	0	0	0	0	0
OTU_271	Bacteria	Proteobacteria	Alphaproteobacteria	Rhodospirillales	Unclassified	Unclassified	Unclassified	0	0	9	0	0	0	0	0	0	0	0	0	0	0	12	0	0	0	0	0	0	0	0	0
OTU_2718	Bacteria	Proteobacteria	Alphaproteobacteria	Rickettsiales	Mitochondria	Unclassified	Unclassified	0	0	0	0	0	0	0	0	0	0	0	0	0	0	0	0	0	0	0	19	0	0	0	0
OTU_2723	Bacteria	Proteobacteria	Alphaproteobacteria	SAR11 clade	Unclassified	Unclassified	Unclassified	0	0	0	0	0	0	0	0	0	0	0	0	0	0	0	0	0	1	0	0	0	0	0	0
OTU_2726	Bacteria	Proteobacteria	Alphaproteobacteria	Rhodospirillales	Rhodospirillaceae	AEGEAN-169 marine group	uncultured bacterium	0	2	1	0	0	0	0	0	0	0	0	0	0	3	10	0	0	3	0	0	0	0	0	4
OTU_2736	Bacteria	Proteobacteria	Alphaproteobacteria	Rhodobacterales	Rhodobacteraceae	Unclassified	Unclassified	0	0	0	0	0	0	0	0	0	0	0	0	0	0	0	0	1	0	0	1	0	0	1	0
OTU_2748	Bacteria	Proteobacteria	Alphaproteobacteria	SAR11 clade	Surface 1	Unclassified	Unclassified	0	0	0	0	0	0	0	0	0	0	0	0	0	0	1	0	0	0	0	0	0	0	0	0
OTU_2752	Bacteria	Proteobacteria	Alphaproteobacteria	Rhodospirillales	Rhodospirillaceae	uncultured	uncultured alpha proteobacterium	0	0	0	0	0	0	0	0	0	0	0	0	0	0	0	1	0	0	0	0	0	0	0	0
OTU_2761	Bacteria	Proteobacteria	Alphaproteobacteria	Sphingomonadales	Erythrobacteraceae	Unclassified	Unclassified	0	0	0	0	0	0	0	0	0	0	0	1	0	0	0	0	0	0	1	0	0	0	0	0
OTU_2763	Bacteria	Proteobacteria	Alphaproteobacteria	Rickettsiales	Mitochondria	Phaeodactylum tricornutum	Phaeodactylum tricornutum	0	0	0	0	0	0	0	2	0	0	0	0	0	0	0	0	0	0	0	1	0	0	0	0
OTU_2766	Bacteria	Proteobacteria	Alphaproteobacteria	Sphingomonadales	Sphingomonadaceae	Sphingopyxis	uncultured Sphingomonas sp.	0	0	0	0	0	0	1	2	0	0	0	0	5	0	0	0	0	0	27	0	0	0	0	0
OTU_2775	Bacteria	Proteobacteria	Alphaproteobacteria	Rhodospirillales	Rhodospirillaceae	Thalassospira	uncultured gamma proteobacterium	0	0	0	0	0	2	0	0	0	0	0	0	0	0	0	0	0	0	0	0	0	0	0	0
OTU_278	Bacteria	Proteobacteria	Alphaproteobacteria	Rhodospirillales	Rhodospirillaceae	uncultured	marine metagenome	0	52	48	3	4	5	0	0	14	0	0	0	0	31	71	5	3	6	0	3	0	0	2	1
OTU_279	Bacteria	Proteobacteria	Alphaproteobacteria	Rickettsiales	Mitochondria	uncultured bacterium	uncultured bacterium	2	1	0	0	0	0	0	2	0	0	0	0	7	0	0	0	0	0	4	0	0	0	8	40
OTU_2790	Bacteria	Proteobacteria	Alphaproteobacteria	SAR11 clade	Deep 1	Unclassified	Unclassified	0	0	1	0	1	0	0	0	0	0	2	0	0	0	0	0	0	1	0	0	0	0	0	1
OTU_2791	Bacteria	Proteobacteria	Alphaproteobacteria	SAR11 clade	Surface 1	unidentified marine bacterioplankton	unidentified marine bacterioplankton	0	0	2	0	0	0	0	0	0	0	0	0	0	0	0	0	0	0	0	0	0	0	0	0
OTU_2797	Bacteria	Proteobacteria	Alphaproteobacteria	Unclassified	Unclassified	Unclassified	Unclassified	0	0	0	0	0	0	0	0	0	0	0	0	0	0	0	0	0	0	0	0	0	0	2	0
OTU_280	Bacteria	Proteobacteria	Alphaproteobacteria	Sphingomonadales	Sphingomonadaceae	Novosphingobium	Unclassified	0	0	0	0	0	2	0	0	0	0	0	1	0	0	0	0	5	1	4	0	31	0	11	0
OTU_2803	Bacteria	Proteobacteria	Alphaproteobacteria	Rhizobiales	Unclassified	Unclassified	Unclassified	0	0	0	0	0	0	0	0	0	0	0	0	0	0	0	0	0	0	0	0	0	0	1	0
OTU_2807	Bacteria	Proteobacteria	Alphaproteobacteria	Rickettsiales	LWSR-14	uncultured alpha proteobacterium	uncultured alpha proteobacterium	0	1	0	0	0	0	0	0	0	0	0	0	0	0	0	0	0	0	0	0	0	0	0	0
OTU_2813	Bacteria	Proteobacteria	Alphaproteobacteria	Rhizobiales	Unclassified	Unclassified	Unclassified	1	0	0	0	0	0	0	0	0	0	0	0	0	0	0	0	0	0	0	0	2	0	0	0
OTU_2835	Bacteria	Proteobacteria	Alphaproteobacteria	SAR11 clade	Surface 1	Unclassified	Unclassified	26	2	2	1	0	0	1	0	2	0	0	0	5	5	1	0	0	0	0	0	0	0	0	0
OTU_2836	Bacteria	Proteobacteria	Alphaproteobacteria	SAR11 clade	Unclassified	Unclassified	Unclassified	0	2	1	0	0	0	0	0	0	0	0	0	0	0	1	1	1	0	0	0	0	0	0	0
OTU_2840	Bacteria	Proteobacteria	Alphaproteobacteria	E6aD10	Stappia sp. JL1095	Stappia sp. JL1095	Stappia sp. JL1095	1	0	0	0	0	0	0	0	0	0	0	1	0	0	0	0	0	0	0	0	0	0	0	0
OTU_2841	Bacteria	Proteobacteria	Alphaproteobacteria	Rickettsiales	Mitochondria	Unclassified	Unclassified	0	0	0	0	0	0	0	0	0	0	0	0	0	1	0	0	0	0	0	0	0	0	0	0
OTU_2843	Bacteria	Proteobacteria	Alphaproteobacteria	Rhodospirillales	Rhodospirillaceae	Unclassified	Unclassified	0	1	0	0	0	0	0	0	0	0	0	0	0	0	0	0	0	0	0	0	0	0	0	0
OTU_2847	Bacteria	Proteobacteria	Alphaproteobacteria	Rhodospirillales	Rhodospirillaceae	AEGEAN-169 marine group	uncultured bacterium	0	1	0	0	1	0	0	0	0	0	0	0	0	0	0	0	0	0	0	0	0	0	0	0
OTU_2849	Bacteria	Proteobacteria	Alphaproteobacteria	SAR11 clade	Deep 1	Unclassified	Unclassified	0	0	1	0	0	0	0	0	0	0	0	0	0	0	0	0	0	0	0	0	0	0	0	0
OTU_2855	Bacteria	Proteobacteria	Alphaproteobacteria	Sphingomonadales	Erythrobacteraceae	Erythrobacter	unidentified	1	0	0	0	0	0	0	0	0	0	0	2	0	0	0	0	1	0	0	2	0	0	0	0
OTU_2856	Bacteria	Proteobacteria	Alphaproteobacteria	Rickettsiales	Rickettsiaceae	uncultured	uncultured bacterium	0	0	0	0	0	0	0	0	1	0	0	0	0	0	0	0	0	0	0	0	0	0	0	0
OTU_2858	Bacteria	Proteobacteria	Alphaproteobacteria	Rhodobacterales	Rhodobacteraceae	Unclassified	Unclassified	0	0	0	0	0	8	0	0	0	0	0	5	0	0	0	0	0	0	0	0	0	0	0	0
OTU_2861	Bacteria	Proteobacteria	Alphaproteobacteria	Rhizobiales	Methylobacteriaceae	Methylobacterium	Unclassified	2	0	0	1	1	1	0	4	7	1	3	5	0	0	1	4	0	0	10	8	8	0	1	6
OTU_287	Bacteria	Proteobacteria	Alphaproteobacteria	Rickettsiales	SM2D12	uncultured alpha proteobacterium	uncultured alpha proteobacterium	0	0	0	0	0	26	0	0	0	0	0	0	0	0	0	0	0	0	0	0	0	0	0	0
OTU_2872	Bacteria	Proteobacteria	Alphaproteobacteria	SAR11 clade	Surface 1	Unclassified	Unclassified	181	163	44	0	7	18	36	8	8	0	2	2	53	176	67	2	3	9	20	14	4	0	0	7
OTU_2874	Bacteria	Proteobacteria	Alphaproteobacteria	SAR11 clade	Deep 1	uncultured alpha proteobacterium	uncultured alpha proteobacterium	1	56	67	2	5	13	0	0	15	0	0	0	0	34	50	4	1	17	0	6	7	0	7	9
OTU_2878	Bacteria	Proteobacteria	Alphaproteobacteria	Rhizobiales	Phyllobacteriaceae	Unclassified	Unclassified	0	0	0	0	0	0	0	0	0	0	0	0	0	0	0	0	0	0	0	0	0	1	0	0
OTU_2879	Bacteria	Proteobacteria	Alphaproteobacteria	Rhizobiales	Phyllobacteriaceae	Unclassified	Unclassified	0	0	0	0	0	0	0	0	0	0	0	0	0	0	0	0	0	0	0	0	0	1	0	0
OTU_2881	Bacteria	Proteobacteria	Alphaproteobacteria	Rhodospirillales	Unclassified	Unclassified	Unclassified	0	0	0	0	0	0	0	0	0	0	0	0	0	0	0	0	0	0	0	0	0	0	0	1
OTU_2887	Bacteria	Proteobacteria	Alphaproteobacteria	Sphingomonadales	Erythrobacteraceae	Erythrobacter	Unclassified	0	0	0	0	0	0	0	0	0	0	0	0	0	0	0	0	0	0	0	0	0	1	0	0
OTU_2888	Bacteria	Proteobacteria	Alphaproteobacteria	Rhodobacterales	Rhodobacteraceae	Unclassified	Unclassified	1	0	0	3	2	8	0	0	0	0	0	5	0	0	0	0	5	25	0	0	0	0	11	36
OTU_289	Bacteria	Proteobacteria	Alphaproteobacteria	Rhodobacterales	Rhodobacteraceae	uncultured	unidentified marine bacterioplankton	19	0	0	0	1	0	12	2	2	1	0	0	21	7	1	0	0	0	13	0	0	0	0	10
OTU_29	Bacteria	Proteobacteria	Alphaproteobacteria	Rickettsiales	LWSR-14	Sinorickettsia chlamys	Sinorickettsia chlamys	1	0	0	13	54	58	0	0	0	15	0	8	0	0	12	84	66	5	0	0	1	48	36	33
OTU_2900	Bacteria	Proteobacteria	Alphaproteobacteria	Rhodospirillales	Rhodospirillaceae	Defluviicoccus	uncultured bacterium KM3-47-A6	0	0	0	0	0	0	0	0	0	0	0	0	0	2	0	0	0	0	0	0	0	0	0	0
OTU_2907	Bacteria	Proteobacteria	Alphaproteobacteria	Rhodospirillales	Acetobacteraceae	uncultured	unidentified	0	0	0	0	0	1	0	0	0	0	0	0	0	0	0	0	0	0	0	0	0	0	3	0
OTU_2908	Bacteria	Proteobacteria	Alphaproteobacteria	Rhodobacterales	Rhodobacteraceae	Unclassified	Unclassified	0	0	0	0	0	2	0	0	0	0	0	2	0	0	0	0	0	3	0	0	0	0	1	5
OTU_291	Bacteria	Proteobacteria	Alphaproteobacteria	Unclassified	Unclassified	Unclassified	Unclassified	13	0	0	0	0	0	0	2	0	0	0	0	5	1	0	0	0	1	3	0	0	0	9	68
OTU_2910	Bacteria	Proteobacteria	Alphaproteobacteria	Rhizobiales	Phyllobacteriaceae	Unclassified	Unclassified	0	0	0	0	1	0	0	0	0	0	0	0	0	0	0	0	0	0	0	0	0	0	0	0
OTU_2913	Bacteria	Proteobacteria	Alphaproteobacteria	DB1-14	uncultured bacterium	uncultured bacterium	uncultured bacterium	0	0	0	0	0	1	0	0	0	0	0	1	0	0	0	0	0	0	0	0	0	0	0	0
OTU_2919	Bacteria	Proteobacteria	Alphaproteobacteria	Sphingomonadales	Sphingomonadaceae	Sphingomonas	Unclassified	0	0	0	0	0	0	0	0	0	0	0	0	0	0	0	0	0	0	0	0	1	0	0	0
OTU_2931	Bacteria	Proteobacteria	Alphaproteobacteria	SAR11 clade	Surface 1	Unclassified	Unclassified	0	1	0	0	0	0	0	0	1	0	0	0	0	0	0	0	0	1	0	0	0	0	0	0
OTU_2933	Bacteria	Proteobacteria	Alphaproteobacteria	Rhizobiales	Methylobacteriaceae	Methylobacterium	Methylobacterium aerolatum	2	0	1	0	3	0	0	1	3	1	0	0	0	1	0	1	1	0	10	2	5	0	4	6
OTU_2939	Bacteria	Proteobacteria	Alphaproteobacteria	Rickettsiales	Rickettsiales Incertae Sedis	Candidatus Lariskella	Unclassified	0	0	0	0	0	0	0	0	0	0	0	0	0	0	0	0	0	0	1	0	0	0	0	0
OTU_2940	Bacteria	Proteobacteria	Alphaproteobacteria	Rickettsiales	Mitochondria	Unclassified	Unclassified	0	0	0	0	0	0	0	0	0	0	0	0	0	0	0	0	0	0	0	10	0	0	0	0
OTU_2942	Bacteria	Proteobacteria	Alphaproteobacteria	Rickettsiales	Mitochondria	Phaeodactylum tricornutum	Phaeodactylum tricornutum	0	0	0	0	0	0	0	0	0	0	0	0	0	0	0	0	0	0	2	0	0	0	0	0
OTU_2950	Bacteria	Proteobacteria	Alphaproteobacteria	Rhizobiales	Methylobacteriaceae	Methylobacterium	Unclassified	0	0	0	0	0	0	0	0	0	0	0	0	0	0	0	0	0	0	0	0	1	0	0	0
OTU_2957	Bacteria	Proteobacteria	Alphaproteobacteria	DB1-14	uncultured bacterium	uncultured bacterium	uncultured bacterium	0	0	0	0	0	1	0	0	0	0	0	0	0	0	0	0	0	0	0	0	0	0	0	0
OTU_2958	Bacteria	Proteobacteria	Alphaproteobacteria	SAR11 clade	Surface 1	uncultured marine microorganism	uncultured marine microorganism	0	0	0	0	2	3	0	0	2	0	1	0	0	0	3	1	3	2	0	0	0	0	1	0
OTU_2964	Bacteria	Proteobacteria	Alphaproteobacteria	Rhodobacterales	Rhodobacteraceae	Unclassified	Unclassified	0	0	0	0	1	2	0	0	0	0	0	0	0	0	0	0	0	0	0	0	0	0	0	0
OTU_2976	Bacteria	Proteobacteria	Alphaproteobacteria	SAR11 clade	Unclassified	Unclassified	Unclassified	0	0	0	0	0	1	0	0	0	0	0	0	0	0	0	0	0	0	0	0	0	0	0	0
OTU_2984	Bacteria	Proteobacteria	Alphaproteobacteria	Rickettsiales	Mitochondria	Unclassified	Unclassified	0	0	0	0	0	0	0	2	1	0	0	0	0	0	0	0	0	0	0	6	0	0	0	0
OTU_2990	Bacteria	Proteobacteria	Alphaproteobacteria	Unclassified	Unclassified	Unclassified	Unclassified	0	0	0	0	1	0	0	0	0	0	0	0	0	0	0	0	0	0	0	0	0	0	0	0
OTU_2991	Bacteria	Proteobacteria	Alphaproteobacteria	SAR11 clade	Deep 1	Unclassified	Unclassified	0	0	1	1	0	2	0	0	0	0	0	0	0	0	0	0	0	0	0	0	0	0	0	0
OTU_2999	Bacteria	Proteobacteria	Alphaproteobacteria	Rhodobacterales	Rhodobacteraceae	Unclassified	Unclassified	0	0	0	0	0	0	0	0	1	0	0	0	0	0	0	0	0	0	0	0	0	0	0	0
OTU_3	Bacteria	Proteobacteria	Alphaproteobacteria	Sphingomonadales	Erythrobacteraceae	Erythrobacter	uncultured Erythrobacter sp.	414	64	95	394	1643	1300	27	195	186	45	68	436	159	11	47	274	232	240	1006	121	109	142	89	141
OTU_300	Bacteria	Proteobacteria	Alphaproteobacteria	SAR11 clade	Surface 2	uncultured bacterium	uncultured bacterium	244	16	23	0	2	5	27	8	6	0	0	0	27	33	4	2	3	5	63	3	3	0	1	2
OTU_3002	Bacteria	Proteobacteria	Alphaproteobacteria	Sphingomonadales	Erythrobacteraceae	Unclassified	Unclassified	0	16	2	0	0	0	0	1	11	0	0	0	0	2	0	0	0	0	0	5	0	0	0	0
OTU_3006	Bacteria	Proteobacteria	Alphaproteobacteria	Rhizobiales	Phyllobacteriaceae	Unclassified	Unclassified	0	0	0	0	1	0	0	0	0	0	0	0	0	0	0	0	0	0	0	0	0	0	0	0
OTU_3009	Bacteria	Proteobacteria	Alphaproteobacteria	Caulobacterales	Caulobacteraceae	Brevundimonas	uncultured Caulobacteraceae bacterium	0	0	0	1	1	3	1	0	0	0	8	0	0	0	0	0	0	0	0	0	0	0	0	0
OTU_3015	Bacteria	Proteobacteria	Alphaproteobacteria	Rickettsiales	Mitochondria	uncultured deep-sea bacterium	uncultured deep-sea bacterium	0	0	0	0	0	1	0	0	0	0	0	0	0	0	0	0	0	0	0	0	0	0	0	0
OTU_3018	Bacteria	Proteobacteria	Alphaproteobacteria	SAR11 clade	Surface 1	uncultured marine microorganism	uncultured marine microorganism	0	1	0	0	0	0	0	0	0	0	0	0	0	0	3	0	0	0	0	0	0	0	0	0
OTU_3020	Bacteria	Proteobacteria	Alphaproteobacteria	SAR11 clade	Deep 1	Unclassified	Unclassified	0	22	12	0	1	5	0	1	19	0	0	0	0	12	17	1	5	2	0	2	5	0	8	4
OTU_3022	Bacteria	Proteobacteria	Alphaproteobacteria	Rhodospirillales	Rhodospirillaceae	Thalassospira	Unclassified	0	0	0	0	1	0	0	0	0	0	0	0	0	0	0	0	0	0	0	0	0	0	0	0
OTU_3025	Bacteria	Proteobacteria	Alphaproteobacteria	SAR11 clade	Deep 1	uncultured bacterium	uncultured bacterium	1	30	66	0	28	23	0	0	62	3	5	1	0	13	91	8	5	13	0	1	25	0	11	7
OTU_3032	Bacteria	Proteobacteria	Alphaproteobacteria	DB1-14	uncultured organism	uncultured organism	uncultured organism	0	1	0	0	0	0	0	0	1	0	0	0	0	0	0	0	0	0	0	0	0	0	0	0
OTU_3035	Bacteria	Proteobacteria	Alphaproteobacteria	Sphingomonadales	Sphingomonadaceae	Unclassified	Unclassified	0	0	0	0	5	0	0	0	0	0	0	0	0	0	0	0	0	0	0	0	0	0	0	0
OTU_3036	Bacteria	Proteobacteria	Alphaproteobacteria	SAR11 clade	Deep 1	Unclassified	Unclassified	0	0	1	0	1	0	0	0	0	0	0	0	0	0	2	1	1	0	0	0	1	0	0	1
OTU_3039	Bacteria	Proteobacteria	Alphaproteobacteria	Rhodobacterales	Rhodobacteraceae	Unclassified	Unclassified	0	0	0	0	1	0	0	0	0	0	0	0	0	0	0	0	0	0	0	0	0	0	0	0
OTU_3042	Bacteria	Proteobacteria	Alphaproteobacteria	Rhodospirillales	Rhodospirillaceae	AEGEAN-169 marine group	Unclassified	0	0	0	0	0	0	0	0	0	0	0	0	0	1	0	0	0	0	0	0	0	0	0	0
OTU_3047	Bacteria	Proteobacteria	Alphaproteobacteria	Rickettsiales	Rickettsiaceae	Candidatus Cryptoprodotis	uncultured bacterium	0	0	0	0	0	0	0	0	0	0	0	0	0	1	0	0	0	0	0	1	0	0	0	0
OTU_3050	Bacteria	Proteobacteria	Alphaproteobacteria	Rhodobacterales	Rhodobacteraceae	Unclassified	Unclassified	1	0	0	0	1	9	0	0	0	1	1	6	0	0	1	7	2	17	0	0	0	0	2	24
OTU_3055	Bacteria	Proteobacteria	Alphaproteobacteria	Rickettsiales	Mitochondria	Unclassified	Unclassified	0	0	0	0	0	0	0	0	0	1	0	0	0	0	0	0	0	0	0	0	0	0	0	0
OTU_3056	Bacteria	Proteobacteria	Alphaproteobacteria	Rhodospirillales	Rhodospirillaceae	Magnetospira	uncultured bacterium	0	0	1	0	0	0	0	0	0	0	0	0	0	0	1	0	0	0	0	0	0	0	0	0
OTU_3067	Bacteria	Proteobacteria	Alphaproteobacteria	SAR11 clade	Deep 1	Unclassified	Unclassified	0	0	0	0	0	0	0	0	0	0	0	0	0	0	1	0	0	0	0	0	0	0	0	0
OTU_3072	Bacteria	Proteobacteria	Alphaproteobacteria	SAR11 clade	Surface 1	Candidatus Pelagibacter	Unclassified	6	0	0	0	0	0	0	0	0	0	0	0	0	0	0	0	0	0	0	0	0	0	0	0
OTU_3076	Bacteria	Proteobacteria	Alphaproteobacteria	Rickettsiales	S25-593	uncultured bacterium	uncultured bacterium	1	0	1	0	0	0	0	0	1	0	0	1	0	0	0	0	0	0	0	0	0	0	0	0
OTU_3077	Bacteria	Proteobacteria	Alphaproteobacteria	Rhizobiales	Bradyrhizobiaceae	Unclassified	Unclassified	2	0	0	0	0	0	0	0	0	0	0	0	0	0	0	0	0	0	0	0	0	0	0	0
OTU_308	Bacteria	Proteobacteria	Alphaproteobacteria	Rickettsiales	SM2D12	uncultured bacterium	uncultured bacterium	0	0	0	1	1	1	0	0	0	0	0	0	0	4	14	1	0	0	0	0	0	0	0	0
OTU_3087	Bacteria	Proteobacteria	Alphaproteobacteria	Rhizobiales	Phyllobacteriaceae	Unclassified	Unclassified	0	0	0	0	0	0	0	0	0	0	0	0	0	0	0	0	0	0	0	0	0	1	0	0
OTU_3094	Bacteria	Proteobacteria	Alphaproteobacteria	Rhizobiales	Unclassified	Unclassified	Unclassified	0	0	0	0	0	0	0	0	1	0	0	0	0	0	0	0	0	0	1	1	0	0	0	2
OTU_3096	Bacteria	Proteobacteria	Alphaproteobacteria	Rhodobacterales	Rhodobacteraceae	Unclassified	Unclassified	0	0	0	0	0	0	0	0	0	0	0	0	0	0	0	0	0	1	0	0	0	0	0	1
OTU_31	Bacteria	Proteobacteria	Alphaproteobacteria	Rhodobacterales	Rhodobacteraceae	Paracocccus	unidentified marine bacterioplankton	0	0	0	18	6	3	0	0	1	22	11	224	0	0	0	3	8	11	13	0	135	0	25	76
OTU_311	Bacteria	Proteobacteria	Alphaproteobacteria	Sphingomonadales	Erythrobacteraceae	Erythrobacter	Erythrobacter sp. sw186	0	0	1	5	26	1	1	0	0	1	4	2	2	0	1	18	17	2	4	2	10	20	5	1
OTU_3111	Bacteria	Proteobacteria	Alphaproteobacteria	SAR11 clade	Unclassified	Unclassified	Unclassified	0	1	0	0	0	0	0	0	0	0	0	0	0	0	0	0	0	0	0	0	0	0	0	0
OTU_3112	Bacteria	Proteobacteria	Alphaproteobacteria	Rickettsiales	S25-593	uncultured Rickettsiales bacterium	uncultured Rickettsiales bacterium	0	1	0	0	0	0	0	0	0	0	0	0	0	0	0	0	0	0	0	0	0	0	0	0
OTU_3115	Bacteria	Proteobacteria	Alphaproteobacteria	SAR11 clade	Surface 1	Candidatus Pelagibacter	Unclassified	4	0	1	0	0	1	0	1	0	0	0	0	3	1	0	0	0	1	2	0	0	0	0	0
OTU_3123	Bacteria	Proteobacteria	Alphaproteobacteria	Sphingomonadales	Unclassified	Unclassified	Unclassified	0	0	0	1	0	0	1	0	0	0	0	2	0	0	0	0	0	1	0	0	0	0	0	0
OTU_3132	Bacteria	Proteobacteria	Alphaproteobacteria	SAR11 clade	Deep 1	Unclassified	Unclassified	0	11	3	1	3	3	0	0	3	0	0	0	0	1	8	1	0	5	0	0	0	0	2	1
OTU_3143	Bacteria	Proteobacteria	Alphaproteobacteria	Rhodobacterales	Rhodobacteraceae	uncultured	Rhodobacter sp. R18	0	0	0	0	0	0	0	0	0	0	2	0	0	0	0	0	0	0	0	0	0	0	0	0
OTU_3149	Bacteria	Proteobacteria	Alphaproteobacteria	Rhodobacterales	Rhodobacteraceae	Unclassified	Unclassified	0	0	0	7	0	0	0	0	0	2	0	0	0	0	0	0	0	0	0	1	0	0	0	0
OTU_3150	Bacteria	Proteobacteria	Alphaproteobacteria	DB1-14	uncultured bacterium	uncultured bacterium	uncultured bacterium	0	0	0	0	0	2	0	0	0	0	0	0	0	0	0	0	0	0	0	0	0	0	0	0
OTU_3151	Bacteria	Proteobacteria	Alphaproteobacteria	Unclassified	Unclassified	Unclassified	Unclassified	0	0	0	0	0	2	0	0	0	0	0	0	0	0	0	0	0	0	0	0	0	0	0	0
OTU_316	Bacteria	Proteobacteria	Alphaproteobacteria	Rhodospirillales	Rhodospirillaceae	Defluviicoccus	uncultured bacterium	0	24	33	2	6	4	0	0	0	0	0	0	0	6	5	4	4	10	0	0	0	0	0	2
OTU_3160	Bacteria	Proteobacteria	Alphaproteobacteria	Kordiimonadales	Kordiimonadaceae	Kordiimonas	Unclassified	0	0	0	0	0	1	0	0	0	0	0	0	0	0	0	0	0	0	0	0	0	0	0	0
OTU_3168	Bacteria	Proteobacteria	Alphaproteobacteria	Rickettsiales	Unclassified	Unclassified	Unclassified	0	0	0	0	0	0	0	0	0	0	0	0	0	0	0	0	0	3	0	0	0	0	0	0
OTU_317	Bacteria	Proteobacteria	Alphaproteobacteria	Rhodospirillales	Rhodospirillaceae	Defluviicoccus	Unclassified	32	0	1	0	2	0	5	1	0	0	0	0	10	8	0	2	0	1	18	0	0	0	2	3
OTU_3172	Bacteria	Proteobacteria	Alphaproteobacteria	SAR11 clade	Deep 1	Unclassified	Unclassified	0	0	6	0	1	6	0	0	2	0	0	0	0	0	6	1	2	0	0	0	2	0	6	1
OTU_3173	Bacteria	Proteobacteria	Alphaproteobacteria	Sphingomonadales	Erythrobacteraceae	Erythrobacter	Unclassified	0	0	0	0	0	0	0	0	0	0	0	0	0	0	0	0	0	1	0	0	0	0	0	0
OTU_3174	Bacteria	Proteobacteria	Alphaproteobacteria	Rickettsiales	Mitochondria	Unclassified	Unclassified	0	0	0	0	0	0	0	0	0	0	0	0	0	0	0	0	0	0	2	0	0	0	0	0
OTU_3187	Bacteria	Proteobacteria	Alphaproteobacteria	SAR11 clade	Deep 1	Unclassified	Unclassified	0	25	14	2	5	4	0	0	11	0	3	0	0	19	16	1	2	13	0	0	3	0	2	13
OTU_319	Bacteria	Proteobacteria	Alphaproteobacteria	SAR11 clade	Deep 1	uncultured marine microorganism	uncultured marine microorganism	0	63	15	3	12	0	0	0	9	0	0	5	0	20	33	0	1	0	0	3	16	0	1	0
OTU_3192	Bacteria	Proteobacteria	Alphaproteobacteria	Rhodospirillales	Rhodospirillaceae	Novispirillum	uncultured Marispirillum sp.	0	0	0	0	0	0	0	0	0	0	0	0	0	0	0	0	0	0	0	0	1	0	0	0
OTU_3196	Bacteria	Proteobacteria	Alphaproteobacteria	SAR11 clade	Unclassified	Unclassified	Unclassified	0	0	1	0	0	0	0	0	0	0	0	0	0	0	0	0	0	0	0	0	0	0	0	0
OTU_3197	Bacteria	Proteobacteria	Alphaproteobacteria	SAR11 clade	Deep 1	Unclassified	Unclassified	0	0	1	0	0	0	0	0	0	0	0	0	0	0	0	0	0	0	0	0	0	0	0	0
OTU_320	Bacteria	Proteobacteria	Alphaproteobacteria	Sphingomonadales	Erythrobacteraceae	Unclassified	Unclassified	0	0	1	1	5	0	0	0	3	0	0	1	0	0	0	0	0	1	0	14	0	0	0	0
OTU_3203	Bacteria	Proteobacteria	Alphaproteobacteria	Rhodobacterales	Rhodobacteraceae	uncultured	Roseobacter sp. P7	2	0	2	11	20	10	0	0	20	0	7	12	0	18	6	108	36	12	0	7	0	0	0	2
OTU_3221	Bacteria	Proteobacteria	Alphaproteobacteria	SAR11 clade	Deep 1	Unclassified	Unclassified	0	0	1	0	0	0	0	0	0	0	0	0	0	0	0	0	0	0	0	0	0	0	0	0
OTU_3224	Bacteria	Proteobacteria	Alphaproteobacteria	Rickettsiales	Mitochondria	uncultured bacterium	uncultured bacterium	0	0	0	0	0	1	0	0	0	0	0	0	0	0	0	0	0	0	0	0	0	0	0	0
OTU_3230	Bacteria	Proteobacteria	Alphaproteobacteria	Rhodobacterales	Rhodobacteraceae	Unclassified	Unclassified	0	1	0	0	0	0	0	0	0	0	0	0	0	0	0	0	0	0	0	0	0	0	0	0
OTU_3233	Bacteria	Proteobacteria	Alphaproteobacteria	Rhizobiales	Unclassified	Unclassified	Unclassified	0	1	0	0	0	0	0	0	0	0	0	0	0	0	0	0	0	0	0	0	0	0	0	0
OTU_3237	Bacteria	Proteobacteria	Alphaproteobacteria	DB1-14	Unclassified	Unclassified	Unclassified	0	0	2	0	0	0	0	0	0	0	0	0	0	0	0	0	0	0	0	0	0	0	0	0
OTU_3240	Bacteria	Proteobacteria	Alphaproteobacteria	Unclassified	Unclassified	Unclassified	Unclassified	0	0	1	0	0	0	0	0	0	0	0	0	0	0	0	0	0	0	0	0	0	0	0	0
OTU_3242	Bacteria	Proteobacteria	Alphaproteobacteria	SAR11 clade	Surface 1	Unclassified	Unclassified	0	0	1	0	0	0	0	0	0	0	0	0	0	4	0	0	0	0	0	0	0	0	0	0
OTU_3249	Bacteria	Proteobacteria	Alphaproteobacteria	Rickettsiales	LWSR-14	uncultured bacterium	uncultured bacterium	0	0	0	0	0	0	0	0	0	0	0	0	0	0	0	0	0	0	5	0	0	0	0	0
OTU_3252	Bacteria	Proteobacteria	Alphaproteobacteria	Rickettsiales	Mitochondria	Unclassified	Unclassified	0	1	0	0	0	0	0	0	0	0	0	0	0	0	0	0	0	0	0	1	0	0	0	0
OTU_3264	Bacteria	Proteobacteria	Alphaproteobacteria	Rhizobiales	Phyllobacteriaceae	Unclassified	Unclassified	0	0	0	0	0	0	0	0	0	0	0	0	0	0	0	0	0	0	0	0	0	1	0	0
OTU_3273	Bacteria	Proteobacteria	Alphaproteobacteria	Rhizobiales	Phyllobacteriaceae	Hoeflea	Unclassified	0	0	0	0	0	0	0	0	0	0	0	0	0	0	0	0	0	0	0	0	0	1	0	0
OTU_3279	Bacteria	Proteobacteria	Alphaproteobacteria	SAR11 clade	Deep 1	Unclassified	Unclassified	0	1	0	0	0	0	0	0	0	0	0	0	0	0	0	0	0	0	0	0	0	0	0	0
OTU_328	Bacteria	Proteobacteria	Alphaproteobacteria	Rhodospirillales	Rhodospirillaceae	Defluviicoccus	uncultured bacterium KM3-47-A6	0	1	0	0	3	6	0	0	0	0	0	0	0	0	0	4	3	23	0	0	0	0	0	0
OTU_3281	Bacteria	Proteobacteria	Alphaproteobacteria	Rhodospirillales	Rhodospirillaceae	Magnetospira	uncultured nuHF1 cluster bacterium HF0130_24M16	0	3	1	0	0	0	0	0	0	0	0	0	0	0	1	0	0	0	0	0	0	0	0	1
OTU_3284	Bacteria	Proteobacteria	Alphaproteobacteria	Rhodobacterales	Rhodobacteraceae	Unclassified	Unclassified	0	0	0	0	0	0	0	0	0	0	0	1	0	0	0	0	0	0	0	0	0	0	0	0
OTU_3285	Bacteria	Proteobacteria	Alphaproteobacteria	Sphingomonadales	Erythrobacteraceae	Altererythrobacter	Unclassified	0	0	0	0	0	0	0	0	0	0	0	2	0	0	0	0	0	0	0	0	0	0	0	0
OTU_3303	Bacteria	Proteobacteria	Alphaproteobacteria	Rhizobiales	Methylobacteriaceae	Methylobacterium	Unclassified	0	0	0	12	0	0	0	0	0	0	0	1	0	0	0	0	0	0	0	0	0	0	0	0
OTU_3307	Bacteria	Proteobacteria	Alphaproteobacteria	Rhizobiales	Methylobacteriaceae	Microvirga	uncultured bacterium	0	0	0	0	1	0	0	0	0	0	0	0	0	0	0	0	0	0	0	0	0	0	0	0
OTU_3313	Bacteria	Proteobacteria	Alphaproteobacteria	SAR11 clade	Deep 1	Unclassified	Unclassified	0	24	12	0	0	2	0	0	4	0	0	0	0	7	14	0	1	0	0	0	4	0	0	0
OTU_3315	Bacteria	Proteobacteria	Alphaproteobacteria	Rhodobacterales	Rhodobacteraceae	uncultured	Rhodobacter sp. R18	0	0	0	0	0	0	0	0	0	0	0	0	0	0	0	0	0	0	0	0	0	0	1	0
OTU_3317	Bacteria	Proteobacteria	Alphaproteobacteria	Rhodobacterales	Rhodobacteraceae	Unclassified	Unclassified	0	0	0	0	0	0	0	0	0	0	0	0	0	0	0	0	0	0	0	0	0	0	0	1
OTU_332	Bacteria	Proteobacteria	Alphaproteobacteria	Rhodobacterales	Rhodobacteraceae	Roseivivax	bacterium BW3PhS22	0	0	1	3	1	8	0	0	0	0	0	0	0	0	0	2	1	2	0	0	0	0	3	6
OTU_3329	Bacteria	Proteobacteria	Alphaproteobacteria	Rhodobacterales	Rhodobacteraceae	Unclassified	Unclassified	0	0	0	0	0	1	0	0	0	0	0	0	0	0	0	2	0	1	0	0	0	0	1	0
OTU_3330	Bacteria	Proteobacteria	Alphaproteobacteria	Unclassified	Unclassified	Unclassified	Unclassified	0	0	0	0	0	0	0	0	0	0	0	0	0	0	0	0	0	0	0	0	0	0	2	0
OTU_3332	Bacteria	Proteobacteria	Alphaproteobacteria	Rhodobacterales	Rhodobacteraceae	uncultured	Rhodobacter sp. R18	0	0	0	0	0	0	0	0	0	0	0	0	0	0	0	0	0	0	0	0	0	0	2	0
OTU_3334	Bacteria	Proteobacteria	Alphaproteobacteria	Rickettsiales	Mitochondria	Unclassified	Unclassified	0	0	0	0	0	0	0	0	1	0	0	0	0	0	0	0	0	0	0	0	0	0	0	0
OTU_334	Bacteria	Proteobacteria	Alphaproteobacteria	Rhizobiales	Bartonellaceae	Bartonella	uncultured bacterium	1	0	0	0	0	1	0	0	3	3	0	0	0	0	0	0	0	0	4	1	8	0	2	2
OTU_3340	Bacteria	Proteobacteria	Alphaproteobacteria	Rickettsiales	Unclassified	Unclassified	Unclassified	0	0	0	0	0	0	0	0	0	0	0	0	0	0	0	0	0	0	2	0	0	0	0	0
OTU_3341	Bacteria	Proteobacteria	Alphaproteobacteria	Rickettsiales	Rickettsiales Incertae Sedis	Candidatus Captivus	uncultured prokaryote	0	0	0	0	0	0	0	0	0	0	0	0	0	0	0	0	0	0	2	0	0	0	0	0
OTU_3343	Bacteria	Proteobacteria	Alphaproteobacteria	Rhizobiales	Methylobacteriaceae	Methylobacterium	Unclassified	0	0	0	0	0	0	0	0	0	0	0	0	0	0	0	0	0	0	0	2	0	0	0	0
OTU_3345	Bacteria	Proteobacteria	Alphaproteobacteria	Rhodospirillales	Rhodospirillaceae	uncultured	uncultured bacterium	0	0	0	0	0	0	0	0	0	0	0	0	0	0	0	0	0	0	0	0	0	0	0	1
OTU_3350	Bacteria	Proteobacteria	Alphaproteobacteria	Sphingomonadales	Unclassified	Unclassified	Unclassified	0	0	0	0	0	0	0	0	0	0	0	0	0	0	0	0	1	0	1	1	16	0	7	0
OTU_3361	Bacteria	Proteobacteria	Alphaproteobacteria	Rhodobacterales	Rhodobacteraceae	Unclassified	Unclassified	0	0	0	0	0	0	0	0	0	0	0	0	0	0	0	0	0	0	0	0	0	0	1	0
OTU_3366	Bacteria	Proteobacteria	Alphaproteobacteria	Rhodobacterales	Rhodobacteraceae	Unclassified	Unclassified	0	0	0	0	0	0	0	0	0	0	0	0	0	0	0	0	0	0	0	1	0	0	0	0
OTU_3372	Bacteria	Proteobacteria	Alphaproteobacteria	Rickettsiales	Mitochondria	Unclassified	Unclassified	0	0	0	0	0	0	0	0	0	0	0	0	0	0	0	0	0	0	0	0	0	0	2	0
OTU_3373	Bacteria	Proteobacteria	Alphaproteobacteria	Unclassified	Unclassified	Unclassified	Unclassified	0	0	0	0	0	0	0	0	0	0	0	0	0	0	0	0	0	0	0	0	1	0	0	0
OTU_3377	Bacteria	Proteobacteria	Alphaproteobacteria	Rhodospirillales	Rhodospirillaceae	uncultured	uncultured alpha proteobacterium	0	0	0	0	0	0	0	0	0	0	0	0	0	0	0	0	0	0	0	0	0	0	4	0
OTU_3379	Bacteria	Proteobacteria	Alphaproteobacteria	Rhizobiales	Phyllobacteriaceae	uncultured	uncultured alpha proteobacterium	0	0	0	0	0	0	0	0	0	0	0	0	0	0	0	0	0	0	0	0	0	0	0	1
OTU_3381	Bacteria	Proteobacteria	Alphaproteobacteria	DB1-14	uncultured bacterium	uncultured bacterium	uncultured bacterium	0	0	0	0	0	0	0	0	0	0	0	0	0	0	0	0	0	0	0	0	0	0	0	1
OTU_3388	Bacteria	Proteobacteria	Alphaproteobacteria	Rhodobacterales	Rhodobacteraceae	Unclassified	Unclassified	0	0	0	0	2	0	0	0	0	0	0	0	0	0	0	0	0	0	0	0	0	1	1	0
OTU_339	Bacteria	Proteobacteria	Alphaproteobacteria	Rickettsiales	Mitochondria	Unclassified	Unclassified	1	1	0	0	0	0	9	2	0	0	0	0	14	0	0	0	0	0	14	0	0	0	0	0
OTU_3393	Bacteria	Proteobacteria	Alphaproteobacteria	Unclassified	Unclassified	Unclassified	Unclassified	0	0	0	0	1	0	0	0	0	0	0	0	0	0	0	0	0	0	0	0	0	0	0	0
OTU_3395	Bacteria	Proteobacteria	Alphaproteobacteria	Rhodobacterales	Rhodobacteraceae	Unclassified	Unclassified	0	0	0	0	0	0	0	0	0	0	0	0	0	0	0	0	1	0	0	0	0	0	0	0
OTU_3396	Bacteria	Proteobacteria	Alphaproteobacteria	Rhodospirillales	Acetobacteraceae	Craurococcus	uncultured bacterium	0	0	0	0	0	0	0	0	0	0	0	0	0	0	0	0	1	0	0	0	0	0	0	0
OTU_3403	Bacteria	Proteobacteria	Alphaproteobacteria	Rhizobiales	Phyllobacteriaceae	Unclassified	Unclassified	0	0	0	1	0	0	0	0	0	0	0	0	0	0	0	0	0	0	0	0	0	0	0	0
OTU_3406	Bacteria	Proteobacteria	Alphaproteobacteria	Rhodospirillales	Acetobacteraceae	Craurococcus	uncultured bacterium	0	0	0	0	0	1	0	0	0	0	0	0	0	0	0	0	0	0	0	0	0	0	0	0
OTU_3416	Bacteria	Proteobacteria	Alphaproteobacteria	Rhizobiales	Methylobacteriaceae	Methylobacterium	Unclassified	0	0	0	0	0	0	0	0	0	0	0	0	0	0	0	0	0	0	0	0	1	0	0	0
OTU_3417	Bacteria	Proteobacteria	Alphaproteobacteria	Rhodobacterales	Rhodobacteraceae	Ruegeria	Unclassified	0	0	0	0	0	0	0	0	0	0	0	0	0	0	0	0	0	0	0	0	1	0	0	0
OTU_3428	Bacteria	Proteobacteria	Alphaproteobacteria	Unclassified	Unclassified	Unclassified	Unclassified	0	0	0	0	0	0	0	0	0	0	0	0	0	0	0	0	0	4	0	0	0	0	0	0
OTU_3433	Bacteria	Proteobacteria	Alphaproteobacteria	Rhizobiales	Phyllobacteriaceae	Nitratireductor	Unclassified	0	1	0	0	0	0	0	0	0	0	0	0	0	0	0	0	0	0	0	0	0	0	0	0
OTU_3450	Bacteria	Proteobacteria	Alphaproteobacteria	Rickettsiales	Mitochondria	Unclassified	Unclassified	0	0	0	0	0	0	0	0	0	0	0	0	0	0	0	0	4	0	8	0	1	0	0	0
OTU_346	Bacteria	Proteobacteria	Alphaproteobacteria	Rhodobacterales	Rhodobacteraceae	Unclassified	Unclassified	0	0	0	29	0	1	0	0	0	15	0	0	0	0	0	0	0	0	1	0	0	0	0	0
OTU_3460	Bacteria	Proteobacteria	Alphaproteobacteria	SB1-18	uncultured alpha proteobacterium	uncultured alpha proteobacterium	uncultured alpha proteobacterium	0	0	0	0	0	0	0	0	0	0	0	0	0	0	0	0	0	1	0	0	0	0	0	0
OTU_3461	Bacteria	Proteobacteria	Alphaproteobacteria	SAR11 clade	Surface 1	Unclassified	Unclassified	0	0	0	0	0	0	0	0	0	0	0	0	0	2	0	0	0	0	0	0	0	0	0	0
OTU_3473	Bacteria	Proteobacteria	Alphaproteobacteria	SAR11 clade	Unclassified	Unclassified	Unclassified	0	0	0	0	0	0	0	0	0	0	0	0	1	0	0	0	0	0	1	0	0	0	0	0
OTU_3484	Bacteria	Proteobacteria	Alphaproteobacteria	Caulobacterales	Hyphomonadaceae	Maricaulis sp. JL2009	Maricaulis sp. JL2009	0	0	0	0	0	0	0	0	0	0	0	0	0	0	0	0	0	1	0	0	0	0	0	0
OTU_349	Bacteria	Proteobacteria	Alphaproteobacteria	Rhodobacterales	Rhodobacteraceae	Roseobacter clade NAC11-7 lineage	uncultured Thalassobacter sp.	0	0	0	0	0	0	0	0	0	0	0	0	0	0	0	0	0	0	0	0	13	0	0	0
OTU_3495	Bacteria	Proteobacteria	Alphaproteobacteria	SAR11 clade	Unclassified	Unclassified	Unclassified	1	0	0	0	0	0	0	0	0	0	0	0	0	1	0	0	0	0	0	0	0	0	0	0
OTU_3501	Bacteria	Proteobacteria	Alphaproteobacteria	SAR11 clade	Surface 1	Unclassified	Unclassified	1	0	0	1	0	0	0	0	0	0	0	0	0	0	1	0	0	0	0	0	0	0	1	0
OTU_353	Bacteria	Proteobacteria	Alphaproteobacteria	Rhodobacterales	Rhodobacteraceae	Loktanella	Loktanella sp. J-TF4	5	2	0	11	22	6	0	1	5	0	6	18	0	0	0	0	2	15	8	16	0	0	1	4
OTU_3532	Bacteria	Proteobacteria	Alphaproteobacteria	SAR11 clade	Unclassified	Unclassified	Unclassified	0	0	1	0	0	0	0	0	0	0	0	0	0	2	0	0	0	0	0	0	0	0	0	0
OTU_3535	Bacteria	Proteobacteria	Alphaproteobacteria	Rhodospirillales	Rhodospirillaceae	Unclassified	Unclassified	0	1	0	0	0	0	0	0	0	0	0	0	0	1	0	0	0	0	0	0	0	0	0	0
OTU_3546	Bacteria	Proteobacteria	Alphaproteobacteria	Rhodobacterales	Rhodobacteraceae	Unclassified	Unclassified	0	0	0	0	0	0	0	0	0	0	0	0	0	0	0	0	0	0	0	0	0	0	0	1
OTU_3551	Bacteria	Proteobacteria	Alphaproteobacteria	Rhizobiales	Methylobacteriaceae	Methylobacterium	Unclassified	0	1	0	0	0	0	0	0	0	0	0	0	0	0	0	0	0	0	0	0	0	0	0	0
OTU_3568	Bacteria	Proteobacteria	Alphaproteobacteria	SAR11 clade	Surface 1	marine metagenome	marine metagenome	0	0	3	0	0	0	0	0	0	0	0	0	0	0	0	0	0	0	0	0	0	0	0	0
OTU_3570	Bacteria	Proteobacteria	Alphaproteobacteria	Rhodobacterales	Rhodobacteraceae	Ruegeria	Unclassified	1	0	0	31	2	2	0	0	0	16	0	3	0	0	0	0	0	0	1	1	0	0	0	1
OTU_358	Bacteria	Proteobacteria	Alphaproteobacteria	Rhodospirillales	Rhodospirillaceae	AEGEAN-169 marine group	uncultured Rickettsiales bacterium	0	9	6	0	2	9	0	0	3	0	0	0	0	2	10	2	0	7	0	0	0	0	0	1
OTU_3580	Bacteria	Proteobacteria	Alphaproteobacteria	DB1-14	uncultured organism	uncultured organism	uncultured organism	0	0	0	0	0	1	0	0	0	0	0	0	0	0	0	0	0	0	0	0	0	0	0	0
OTU_3584	Bacteria	Proteobacteria	Alphaproteobacteria	Rhizobiales	Methylobacteriaceae	Methylobacterium	Unclassified	0	0	0	0	0	1	0	0	0	0	0	0	0	0	0	0	0	0	0	0	0	0	0	0
OTU_3593	Bacteria	Proteobacteria	Alphaproteobacteria	SAR11 clade	Deep 1	Unclassified	Unclassified	0	0	1	0	0	0	0	0	2	0	0	0	0	2	0	0	0	0	0	0	0	0	0	0
OTU_3596	Bacteria	Proteobacteria	Alphaproteobacteria	Rhodobacterales	Rhodobacteraceae	uncultured	alpha proteobacterium GMD38A8	0	0	0	0	0	0	0	0	0	0	0	2	0	0	0	0	0	0	0	0	0	0	0	1
OTU_3598	Bacteria	Proteobacteria	Alphaproteobacteria	Sphingomonadales	Erythrobacteraceae	Unclassified	Unclassified	0	0	0	0	0	0	0	0	0	0	0	2	0	0	0	0	0	0	0	0	0	0	0	0
OTU_36	Bacteria	Proteobacteria	Alphaproteobacteria	Rhodobacterales	Rhodobacteraceae	Roseovarius	unidentified marine bacterioplankton	10	5	2	68	13	8	3	14	8	23	19	35	2	0	0	31	0	17	7	12	0	101	10	7
OTU_3601	Bacteria	Proteobacteria	Alphaproteobacteria	Rhodobacterales	Rhodobacteraceae	Thioclava	Thioclava VS-126	0	0	0	0	0	0	0	0	0	0	0	0	0	0	0	0	2	0	0	0	0	0	0	0
OTU_3606	Bacteria	Proteobacteria	Alphaproteobacteria	Rhizobiales	Methylobacteriaceae	Methylobacterium	Unclassified	0	0	0	0	0	0	0	0	0	0	0	0	0	0	0	0	0	0	0	0	0	0	1	0
OTU_3607	Bacteria	Proteobacteria	Alphaproteobacteria	OCS116 clade	uncultured Pseudovibrio sp.	uncultured Pseudovibrio sp.	uncultured Pseudovibrio sp.	0	0	0	0	0	3	0	0	0	0	0	3	0	0	0	0	0	0	0	0	0	0	0	0
OTU_361	Bacteria	Proteobacteria	Alphaproteobacteria	Rhodospirillales	AT-s3-44	uncultured alpha proteobacterium	uncultured alpha proteobacterium	0	33	7	0	0	1	0	0	0	0	0	0	0	9	7	0	0	0	0	0	0	0	0	0
OTU_3627	Bacteria	Proteobacteria	Alphaproteobacteria	Rickettsiales	Rickettsiaceae	Unclassified	Unclassified	0	0	0	0	0	0	0	0	0	0	0	0	0	0	0	0	0	0	3	0	0	0	0	0
OTU_363	Bacteria	Proteobacteria	Alphaproteobacteria	Rickettsiales	Unclassified	Unclassified	Unclassified	0	0	0	0	0	0	0	0	0	0	0	0	0	0	20	0	0	0	0	0	0	0	0	0
OTU_364	Bacteria	Proteobacteria	Alphaproteobacteria	Rhodospirillales	Rhodospirillaceae	Magnetospira	uncultured bacterium	0	0	6	0	3	10	0	0	0	1	0	4	0	0	1	13	1	4	0	0	0	0	6	8
OTU_3647	Bacteria	Proteobacteria	Alphaproteobacteria	Rhodobacterales	Rhodobacteraceae	Paracocccus	Paracoccus zeaxanthinifaciens	0	0	0	3	9	7	0	0	0	1	2	1	0	0	2	0	0	1	0	0	3	0	0	1
OTU_3655	Bacteria	Proteobacteria	Alphaproteobacteria	SAR11 clade	Deep 1	Unclassified	Unclassified	0	1	1	0	2	10	0	0	0	0	1	1	0	0	1	0	1	2	0	0	0	0	1	1
OTU_3662	Bacteria	Proteobacteria	Alphaproteobacteria	Caulobacterales	Hyphomonadaceae	Henriciella	Unclassified	0	0	0	0	2	0	0	0	0	0	0	0	0	0	0	0	4	0	0	0	0	0	1	0
OTU_3668	Bacteria	Proteobacteria	Alphaproteobacteria	Rickettsiales	SM2D12	Unclassified	Unclassified	0	0	0	0	0	1	0	0	0	0	0	0	0	0	0	0	0	0	0	0	0	0	0	0
OTU_367	Bacteria	Proteobacteria	Alphaproteobacteria	Rhodospirillales	AT-s3-44	Unclassified	Unclassified	0	0	0	0	0	3	0	0	0	0	0	0	0	0	1	0	4	11	0	0	0	0	0	0
OTU_3674	Bacteria	Proteobacteria	Alphaproteobacteria	Rhizobiales	Methylobacteriaceae	Methylobacterium	Unclassified	0	0	0	0	0	0	0	0	1	1	0	0	0	0	0	0	0	0	0	0	0	0	0	0
OTU_3682	Bacteria	Proteobacteria	Alphaproteobacteria	SAR11 clade	Deep 1	Unclassified	Unclassified	0	0	20	1	7	47	0	0	7	0	0	0	0	0	24	5	13	15	0	1	1	0	12	9
OTU_3684	Bacteria	Proteobacteria	Alphaproteobacteria	Rhizobiales	Rhizobiaceae	Shinella	uncultured bacterium	0	0	1	2	0	0	0	0	2	0	0	0	3	0	0	0	0	0	1	3	0	0	0	0
OTU_3686	Bacteria	Proteobacteria	Alphaproteobacteria	Rickettsiales	Mitochondria	Proteobacteria bacterium JGI 0000113-D06	Proteobacteria bacterium JGI 0000113-D06	0	0	0	0	0	0	0	0	3	0	0	0	0	0	0	0	0	0	0	0	0	0	0	0
OTU_3689	Bacteria	Proteobacteria	Alphaproteobacteria	Rhodobacterales	Rhodobacteraceae	Unclassified	Unclassified	0	0	0	0	0	0	0	0	3	0	0	0	0	0	0	0	0	0	1	0	0	0	0	0
OTU_369	Bacteria	Proteobacteria	Alphaproteobacteria	Rhodospirillales	Rhodospirillaceae	Magnetospira	uncultured nuHF1 cluster bacterium HF0130_24M16	1	0	0	0	0	0	0	0	0	0	0	0	0	0	0	0	0	0	0	0	0	0	0	13
OTU_3690	Bacteria	Proteobacteria	Alphaproteobacteria	Rickettsiales	Mitochondria	Unclassified	Unclassified	0	0	0	0	0	0	0	0	1	0	0	0	0	0	0	0	0	0	0	0	0	0	0	0
OTU_3691	Bacteria	Proteobacteria	Alphaproteobacteria	Rhizobiales	Unclassified	Unclassified	Unclassified	1	0	0	0	0	0	0	1	1	1	0	0	0	0	0	0	0	0	0	0	0	0	0	0
OTU_3693	Bacteria	Proteobacteria	Alphaproteobacteria	Sphingomonadales	Erythrobacteraceae	Unclassified	Unclassified	0	0	0	0	0	0	0	0	0	0	0	2	0	0	0	0	2	0	0	0	0	0	0	0
OTU_3703	Bacteria	Proteobacteria	Alphaproteobacteria	SAR11 clade	Deep 1	uncultured bacterium	uncultured bacterium	0	0	0	0	0	0	0	0	0	0	0	0	0	3	0	0	0	0	0	0	1	0	0	0
OTU_3706	Bacteria	Proteobacteria	Alphaproteobacteria	OCS116 clade	unidentified marine bacterioplankton	unidentified marine bacterioplankton	unidentified marine bacterioplankton	0	4	0	0	0	0	0	0	0	0	0	0	0	1	0	0	0	0	0	0	0	0	0	0
OTU_3715	Bacteria	Proteobacteria	Alphaproteobacteria	Rhodospirillales	Rhodospirillaceae	uncultured	uncultured deep-sea bacterium	0	0	0	0	1	0	0	0	0	0	0	0	0	0	0	1	0	0	0	0	0	0	0	0
OTU_3717	Bacteria	Proteobacteria	Alphaproteobacteria	Rhodobacterales	Rhodobacteraceae	uncultured	Rhodobacter sp. R18	0	0	0	0	0	0	0	0	0	0	0	0	0	0	0	0	1	0	0	0	0	0	0	0
OTU_3719	Bacteria	Proteobacteria	Alphaproteobacteria	Rhizobiales	Bradyrhizobiaceae	Bradyrhizobium	Unclassified	0	0	0	0	0	0	0	0	1	0	0	0	0	0	0	0	0	3	2	0	0	0	0	0
OTU_3725	Bacteria	Proteobacteria	Alphaproteobacteria	Rhizobiales	Methylobacteriaceae	Methylobacterium	Unclassified	0	0	0	1	0	0	0	0	0	0	1	0	0	0	0	0	0	0	2	0	0	0	0	2
OTU_3729	Bacteria	Proteobacteria	Alphaproteobacteria	Rickettsiales	Unclassified	Unclassified	Unclassified	0	0	0	0	0	0	0	0	0	0	0	0	0	0	0	0	0	0	1	0	0	0	0	0
OTU_3731	Bacteria	Proteobacteria	Alphaproteobacteria	Rhizobiales	Phyllobacteriaceae	Mesorhizobium	Unclassified	0	0	0	0	1	0	0	0	0	0	0	1	0	0	0	0	0	0	1	0	0	4	0	0
OTU_3733	Bacteria	Proteobacteria	Alphaproteobacteria	Caulobacterales	Caulobacteraceae	Brevundimonas	Unclassified	0	0	0	0	0	0	0	0	0	0	0	0	0	0	0	0	0	0	0	1	0	0	0	0
OTU_3738	Bacteria	Proteobacteria	Alphaproteobacteria	Rhizobiales	Rhodobiaceae	Rhodobium	Unclassified	0	0	0	0	0	0	0	0	0	0	0	0	0	0	0	0	0	0	1	0	0	0	0	0
OTU_3749	Bacteria	Proteobacteria	Alphaproteobacteria	Rickettsiales	S25-593	uncultured bacterium	uncultured bacterium	0	0	1	0	0	0	0	0	0	0	0	0	0	0	0	0	0	0	12	0	0	0	0	1
OTU_3751	Bacteria	Proteobacteria	Alphaproteobacteria	Rickettsiales	Mitochondria	Phaeodactylum tricornutum	Phaeodactylum tricornutum	0	0	0	0	0	0	0	0	0	0	0	0	0	0	0	0	0	0	13	1	0	0	0	0
OTU_3757	Bacteria	Proteobacteria	Alphaproteobacteria	SAR11 clade	Surface 1	uncultured marine microorganism	uncultured marine microorganism	0	1	0	0	0	0	0	0	0	0	0	0	0	0	4	0	0	0	0	0	0	0	0	0
OTU_3764	Bacteria	Proteobacteria	Alphaproteobacteria	Sphingomonadales	Sphingomonadaceae	Unclassified	Unclassified	0	0	0	0	0	0	0	0	0	0	0	0	0	0	0	0	0	0	1	0	0	0	0	0
OTU_3765	Bacteria	Proteobacteria	Alphaproteobacteria	Rhodobacterales	Rhodobacteraceae	Oceanicola	Unclassified	0	0	0	0	0	0	0	0	0	0	0	0	0	0	0	0	0	8	0	0	0	0	0	0
OTU_3772	Bacteria	Proteobacteria	Alphaproteobacteria	Rickettsiales	Mitochondria	Unclassified	Unclassified	0	0	0	0	0	0	0	0	0	0	0	0	0	0	0	0	0	0	4	0	0	0	0	0
OTU_3776	Bacteria	Proteobacteria	Alphaproteobacteria	Rhodobacterales	Rhodobacteraceae	Unclassified	Unclassified	0	0	0	0	0	0	0	0	0	0	0	0	0	0	0	0	4	0	0	0	0	0	1	0
OTU_3787	Bacteria	Proteobacteria	Alphaproteobacteria	Rhodospirillales	Acetobacteraceae	Roseomonas	Unclassified	0	0	0	0	0	0	0	0	0	0	0	0	0	0	0	0	0	2	0	0	0	0	0	0
OTU_3796	Bacteria	Proteobacteria	Alphaproteobacteria	SAR11 clade	Deep 1	Unclassified	Unclassified	0	0	1	0	0	0	0	0	0	0	0	0	0	0	0	0	0	0	0	0	0	0	0	0
OTU_3798	Bacteria	Proteobacteria	Alphaproteobacteria	Rhizobiales	Unclassified	Unclassified	Unclassified	0	0	0	0	0	0	0	0	0	0	0	0	0	0	0	0	0	0	1	0	0	0	0	0
OTU_38	Bacteria	Proteobacteria	Alphaproteobacteria	SAR11 clade	Surface 1	Candidatus Pelagibacter	uncultured bacterium	358	372	223	15	18	75	39	13	65	3	1	4	94	259	248	13	21	47	41	47	18	0	0	7
OTU_3800	Bacteria	Proteobacteria	Alphaproteobacteria	SAR11 clade	Unclassified	Unclassified	Unclassified	0	0	0	0	0	0	0	0	0	0	0	0	0	0	0	0	0	0	0	0	0	0	8	0
OTU_3803	Bacteria	Proteobacteria	Alphaproteobacteria	Rhodobacterales	Rhodobacteraceae	Unclassified	Unclassified	0	0	0	0	0	0	0	0	0	0	0	0	0	1	0	0	0	0	0	0	0	0	0	1
OTU_3818	Bacteria	Proteobacteria	Alphaproteobacteria	Sphingomonadales	Sphingomonadaceae	Unclassified	Unclassified	0	0	0	0	0	0	0	0	0	0	0	1	0	0	0	0	0	0	1	0	0	0	0	0
OTU_3819	Bacteria	Proteobacteria	Alphaproteobacteria	SAR11 clade	Surface 1	uncultured organism	uncultured organism	0	1	0	0	0	0	0	0	0	0	0	0	0	0	0	0	0	0	0	0	0	0	0	0
OTU_3820	Bacteria	Proteobacteria	Alphaproteobacteria	SAR11 clade	Surface 1	marine metagenome	marine metagenome	1	1	0	0	0	0	0	0	0	0	0	0	0	0	0	0	0	0	0	0	0	0	0	0
OTU_3821	Bacteria	Proteobacteria	Alphaproteobacteria	Unclassified	Unclassified	Unclassified	Unclassified	0	2	0	0	0	0	0	0	0	0	0	0	0	0	0	0	0	0	0	0	0	0	0	0
OTU_3826	Bacteria	Proteobacteria	Alphaproteobacteria	Rickettsiales	Mitochondria	uncultured bacterium	uncultured bacterium	0	0	0	0	0	0	0	0	0	0	0	0	0	0	0	0	0	0	1	4	0	0	0	0
OTU_3835	Bacteria	Proteobacteria	Alphaproteobacteria	Rickettsiales	Mitochondria	uncultured bacterium	uncultured bacterium	0	0	0	0	0	0	0	0	2	0	0	0	0	0	0	0	0	0	0	0	0	0	0	0
OTU_3837	Bacteria	Proteobacteria	Alphaproteobacteria	Rhodobacterales	Rhodobacteraceae	uncultured	Roseobacter sp. P7	0	0	0	0	0	0	0	0	0	0	0	0	0	1	0	0	0	0	0	0	0	0	0	0
OTU_3838	Bacteria	Proteobacteria	Alphaproteobacteria	Sneathiellales	Sneathiellaceae	Sneathiella	uncultured bacterium	0	0	0	0	0	0	0	0	0	0	0	0	0	1	0	0	0	0	0	0	0	0	0	0
OTU_384	Bacteria	Proteobacteria	Alphaproteobacteria	Rhodobacterales	Rhodobacteraceae	Thalassobius	uncultured bacterium	2	0	4	4	13	0	0	0	7	0	0	1	0	0	0	2	9	0	21	12	4	1	5	0
OTU_3868	Bacteria	Proteobacteria	Alphaproteobacteria	Rhodobacterales	Rhodobacteraceae	Unclassified	Unclassified	0	0	0	0	0	0	0	0	0	0	0	0	0	0	0	0	1	0	0	0	0	0	0	0
OTU_3872	Bacteria	Proteobacteria	Alphaproteobacteria	Rhizobiales	Phyllobacteriaceae	Unclassified	Unclassified	0	0	0	0	1	0	0	0	0	0	0	1	0	0	0	0	1	0	0	0	0	30	1	0
OTU_3873	Bacteria	Proteobacteria	Alphaproteobacteria	Rhizobiales	Unclassified	Unclassified	Unclassified	0	0	0	0	0	0	0	0	0	0	0	0	0	0	0	0	0	0	0	0	0	1	0	0
OTU_3874	Bacteria	Proteobacteria	Alphaproteobacteria	Rhodobacterales	Rhodobacteraceae	Pelagibaca	Pelagibaca bermudensis	0	0	0	0	1	1	0	0	0	0	0	0	0	0	0	1	2	3	0	0	0	0	3	6
OTU_3876	Bacteria	Proteobacteria	Alphaproteobacteria	Sphingomonadales	Sphingomonadaceae	Sphingomonas	uncultured bacterium	0	0	0	0	0	0	0	0	0	0	0	0	0	0	0	0	0	0	0	0	0	0	0	1
OTU_3883	Bacteria	Proteobacteria	Alphaproteobacteria	Rhodobacterales	Rhodobacteraceae	uncultured	Roseobacter sp. P7	0	0	0	0	0	0	0	0	0	0	0	0	0	0	0	1	0	0	0	0	0	0	0	0
OTU_3889	Bacteria	Proteobacteria	Alphaproteobacteria	Rhodobacterales	Rhodobacteraceae	Unclassified	Unclassified	0	0	0	0	0	0	0	0	0	0	0	0	0	0	0	0	0	0	0	0	0	0	0	1
OTU_3891	Bacteria	Proteobacteria	Alphaproteobacteria	Unclassified	Unclassified	Unclassified	Unclassified	0	0	0	0	0	0	0	0	0	0	0	0	0	0	0	0	0	0	0	0	0	0	0	1
OTU_39	Bacteria	Proteobacteria	Alphaproteobacteria	Rhodobacterales	Rhodobacteraceae	uncultured	unidentified marine bacterioplankton	139	11	2	9	7	3	82	6	14	5	0	2	142	5	1	4	2	5	14	0	0	0	5	13
OTU_3903	Bacteria	Proteobacteria	Alphaproteobacteria	Rhizobiales	Phyllobacteriaceae	Unclassified	Unclassified	0	0	0	0	0	0	0	0	0	0	0	0	0	0	0	0	0	0	0	0	0	1	0	0
OTU_3904	Bacteria	Proteobacteria	Alphaproteobacteria	Rhizobiales	Methylobacteriaceae	Methylobacterium	Unclassified	0	0	0	0	0	0	0	0	0	0	0	0	0	0	0	0	0	0	0	0	0	0	1	0
OTU_3914	Bacteria	Proteobacteria	Alphaproteobacteria	SAR11 clade	Deep 1	Unclassified	Unclassified	0	0	0	0	0	0	0	0	1	0	0	0	0	2	0	0	0	0	0	0	0	0	0	0
OTU_3916	Bacteria	Proteobacteria	Alphaproteobacteria	Rickettsiales	Mitochondria	uncultured bacterium	uncultured bacterium	0	0	0	0	0	0	0	0	4	0	0	0	0	0	0	0	0	0	0	0	0	0	0	0
OTU_3917	Bacteria	Proteobacteria	Alphaproteobacteria	Sphingomonadales	Unclassified	Unclassified	Unclassified	0	0	0	0	1	1	0	0	0	0	0	1	0	0	0	0	0	0	0	0	0	0	0	0
OTU_3919	Bacteria	Proteobacteria	Alphaproteobacteria	Unclassified	Unclassified	Unclassified	Unclassified	0	0	0	0	0	2	0	0	0	0	0	0	0	0	0	0	0	0	0	0	0	0	0	0
OTU_3935	Bacteria	Proteobacteria	Alphaproteobacteria	Rickettsiales	Rickettsiales Incertae Sedis	Candidatus Lariskella	uncultured proteobacterium	0	0	0	0	0	0	0	0	0	0	0	0	0	0	0	0	0	0	3	0	0	0	0	0
OTU_3939	Bacteria	Proteobacteria	Alphaproteobacteria	Rickettsiales	Unclassified	Unclassified	Unclassified	0	0	0	0	0	0	0	0	0	0	0	0	0	0	0	0	0	0	1	0	0	0	0	0
OTU_3946	Bacteria	Proteobacteria	Alphaproteobacteria	SAR11 clade	Deep 1	Unclassified	Unclassified	0	3	0	0	0	0	0	0	0	0	0	0	0	0	0	0	0	0	0	3	0	0	0	0
OTU_3947	Bacteria	Proteobacteria	Alphaproteobacteria	Rhodobacterales	Rhodobacteraceae	uncultured	Rhodobacter sp. R18	0	0	0	0	0	0	0	0	0	0	0	0	0	0	0	0	0	0	0	0	0	0	1	0
OTU_3948	Bacteria	Proteobacteria	Alphaproteobacteria	Rhodobacterales	Rhodobacteraceae	Unclassified	Unclassified	0	0	0	0	0	0	0	0	0	0	0	0	0	0	0	0	0	0	0	0	0	0	1	0
OTU_3949	Bacteria	Proteobacteria	Alphaproteobacteria	Rhodobacterales	Rhodobacteraceae	uncultured	Rhodobacter sp. R18	0	0	0	0	0	0	0	0	0	0	0	0	0	0	0	0	5	0	0	0	0	0	5	0
OTU_395	Bacteria	Proteobacteria	Alphaproteobacteria	SAR11 clade	Surface 2	uncultured SAR11 cluster alpha proteobacterium	uncultured SAR11 cluster alpha proteobacterium	4	66	21	0	0	2	1	0	5	0	0	0	2	16	22	0	0	0	8	5	8	0	0	11
OTU_3950	Bacteria	Proteobacteria	Alphaproteobacteria	Rhodobacterales	Rhodobacteraceae	Maribius	uncultured Maribius sp.	0	0	0	0	0	0	0	0	0	0	0	0	0	0	0	0	0	0	0	0	7	0	0	0
OTU_3951	Bacteria	Proteobacteria	Alphaproteobacteria	Rickettsiales	Rickettsiaceae	Unclassified	Unclassified	0	0	0	0	0	0	0	0	0	0	0	0	0	0	0	0	0	0	0	0	1	0	0	0
OTU_3961	Bacteria	Proteobacteria	Alphaproteobacteria	Rickettsiales	SM2D12	uncultured alpha proteobacterium	uncultured alpha proteobacterium	0	0	0	0	0	1	0	0	0	0	0	0	0	0	0	0	0	2	0	0	0	0	0	0
OTU_3962	Bacteria	Proteobacteria	Alphaproteobacteria	Rhizobiales	Bradyrhizobiaceae	Bradyrhizobium	Unclassified	108	21	61	67	141	141	0	40	69	13	16	31	0	0	1	0	2	1	0	0	0	0	0	6
OTU_3963	Bacteria	Proteobacteria	Alphaproteobacteria	Rhodobacterales	Rhodobacteraceae	Roseovarius	Roseobacter sp. LOB-8	0	0	0	0	0	0	0	0	0	0	0	0	0	0	0	0	0	0	1	0	0	0	0	0
OTU_3977	Bacteria	Proteobacteria	Alphaproteobacteria	Rhizobiales	Xanthobacteraceae	uncultured	uncultured bacterium	0	0	0	0	0	0	0	0	0	0	0	2	0	0	0	1	0	0	0	0	0	0	0	0
OTU_398	Bacteria	Proteobacteria	Alphaproteobacteria	Rickettsiales	Mitochondria	Unclassified	Unclassified	0	0	0	0	0	0	0	0	0	0	0	0	1	0	0	0	0	1	0	0	0	0	0	23
OTU_3985	Bacteria	Proteobacteria	Alphaproteobacteria	Rickettsiales	Mitochondria	Unclassified	Unclassified	0	0	0	0	5	0	0	0	0	0	0	0	0	0	0	0	0	0	0	0	0	0	0	0
OTU_3988	Bacteria	Proteobacteria	Alphaproteobacteria	Rhodospirillales	Rhodospirillaceae	AEGEAN-169 marine group	uncultured Rickettsiales bacterium	0	0	0	0	1	0	0	0	0	0	0	0	0	0	0	0	0	0	0	0	0	0	0	0
OTU_3994	Bacteria	Proteobacteria	Alphaproteobacteria	Rickettsiales	Rickettsiales Incertae Sedis	Candidatus Lariskella	uncultured bacterium	0	0	0	0	0	0	0	0	0	0	0	0	0	0	0	0	0	0	0	0	0	0	0	1
OTU_3995	Bacteria	Proteobacteria	Alphaproteobacteria	Sphingomonadales	Sphingomonadaceae	Sphingobium	uncultured bacterium	0	0	0	0	0	0	0	0	0	0	0	0	0	0	0	0	0	0	0	0	0	0	1	3
OTU_4	Bacteria	Proteobacteria	Alphaproteobacteria	Rhodobacterales	Rhodobacteraceae	Pelagibaca	Unclassified	177	12	39	62	259	230	5	42	77	24	77	138	0	0	16	97	343	1081	0	0	59	12	834	2162
OTU_400	Bacteria	Proteobacteria	Alphaproteobacteria	Rhizobiales	Brucellaceae	Ochrobactrum	uncultured bacterium	0	0	0	0	0	0	0	1	9	4	7	10	0	0	0	1	1	2	2	7	10	0	6	1
OTU_4001	Bacteria	Proteobacteria	Alphaproteobacteria	Rhodobacterales	Rhodobacteraceae	Unclassified	Unclassified	0	0	0	0	0	0	0	0	0	0	0	0	0	0	0	0	0	0	0	0	0	0	0	9
OTU_4002	Bacteria	Proteobacteria	Alphaproteobacteria	Rickettsiales	Mitochondria	uncultured bacterium	uncultured bacterium	0	0	0	0	0	0	0	4	0	0	0	0	0	0	0	0	0	0	0	0	0	0	0	2
OTU_401	Bacteria	Proteobacteria	Alphaproteobacteria	OCS116 clade	Unknown Family	Candidatus Phaeomarinobacter	Mastigocoleus testarum BC008	0	1	0	0	0	2	0	17	7	0	0	0	0	0	0	0	0	0	0	0	0	6	7	0
OTU_4014	Bacteria	Proteobacteria	Alphaproteobacteria	Rhodobacterales	Rhodobacteraceae	Unclassified	Unclassified	0	0	0	0	0	0	0	0	0	0	0	0	0	0	3	0	0	0	0	0	0	0	0	0
OTU_4020	Bacteria	Proteobacteria	Alphaproteobacteria	Rhizobiales	Hyphomicrobiaceae	Unclassified	Unclassified	0	0	0	0	0	0	0	0	0	0	0	1	0	0	0	0	0	0	0	0	0	0	0	0
OTU_4024	Bacteria	Proteobacteria	Alphaproteobacteria	Rhodobacterales	Rhodobacteraceae	Paracocccus	Unclassified	0	0	0	0	0	0	0	0	0	0	0	1	0	0	0	0	0	0	0	0	0	0	0	0
OTU_4031	Bacteria	Proteobacteria	Alphaproteobacteria	SAR11 clade	Surface 1	Unclassified	Unclassified	1	0	0	0	0	0	0	0	0	0	0	0	0	2	0	0	0	0	0	1	0	0	0	0
OTU_4038	Bacteria	Proteobacteria	Alphaproteobacteria	Rhodospirillales	Rhodospirillaceae	AEGEAN-169 marine group	alpha proteobacterium SCGC AB-629-F11	0	1	0	0	0	0	0	0	0	0	0	0	0	0	0	0	0	0	0	0	0	0	0	0
OTU_404	Bacteria	Proteobacteria	Alphaproteobacteria	Rhodospirillales	Rhodospirillaceae	uncultured	uncultured alpha proteobacterium	0	1	7	1	6	11	0	0	16	0	0	0	0	1	3	4	2	11	0	2	1	0	1	7
OTU_4045	Bacteria	Proteobacteria	Alphaproteobacteria	Rickettsiales	Rickettsiales Incertae Sedis	Candidatus Lariskella	uncultured bacterium	0	0	0	0	0	0	0	0	0	0	0	0	0	0	0	0	0	0	0	0	0	0	0	2
OTU_4046	Bacteria	Proteobacteria	Alphaproteobacteria	SAR11 clade	Deep 1	Unclassified	Unclassified	0	3	0	0	0	0	0	0	0	0	0	0	0	0	1	0	0	0	0	0	0	0	0	0
OTU_4050	Bacteria	Proteobacteria	Alphaproteobacteria	Rhodospirillales	Rhodospirillaceae	Thalassospira	Unclassified	1	0	0	0	0	0	0	0	0	0	0	0	0	0	0	0	0	0	0	0	0	0	0	0
OTU_4053	Bacteria	Proteobacteria	Alphaproteobacteria	Rhizobiales	Unclassified	Unclassified	Unclassified	0	0	0	0	0	0	0	0	0	0	0	0	0	0	0	0	1	0	0	0	1	0	0	0
OTU_407	Bacteria	Proteobacteria	Alphaproteobacteria	Rhodospirillales	Rhodospirillaceae	AEGEAN-169 marine group	Unclassified	0	16	9	0	1	1	0	0	0	0	0	0	0	3	13	3	0	0	0	0	0	0	0	0
OTU_4071	Bacteria	Proteobacteria	Alphaproteobacteria	Rhizobiales	Methylobacteriaceae	Methylobacterium	Unclassified	0	0	0	0	0	0	0	0	0	0	0	0	0	0	0	0	0	0	0	0	1	0	0	0
OTU_4080	Bacteria	Proteobacteria	Alphaproteobacteria	Rhodobacterales	Rhodobacteraceae	Paracocccus	Paracoccus marcusii	0	0	0	0	0	0	0	0	0	0	0	3	0	0	0	0	0	1	0	0	3	0	6	0
OTU_4086	Bacteria	Proteobacteria	Alphaproteobacteria	Rhodospirillales	Rhodospirillaceae	Ferrovibrio	uncultured bacterium	0	0	0	0	0	0	0	0	0	0	0	0	0	0	0	0	1	0	0	0	0	0	2	0
OTU_4093	Bacteria	Proteobacteria	Alphaproteobacteria	Rhizobiales	Methylobacteriaceae	Methylobacterium	Unclassified	0	0	0	0	0	0	0	0	0	0	0	0	0	0	0	0	0	0	0	0	1	0	0	0
OTU_4094	Bacteria	Proteobacteria	Alphaproteobacteria	Rhodospirillales	Rhodospirillaceae	Magnetospira	uncultured bacterium	0	0	0	0	3	4	0	0	0	0	0	0	0	0	0	0	0	0	0	0	0	0	0	0
OTU_4096	Bacteria	Proteobacteria	Alphaproteobacteria	DB1-14	Unclassified	Unclassified	Unclassified	0	0	0	0	0	1	0	0	0	0	0	0	0	0	0	0	0	0	0	0	0	0	0	0
OTU_4100	Bacteria	Proteobacteria	Alphaproteobacteria	Rickettsiales	Unclassified	Unclassified	Unclassified	0	0	0	0	0	0	0	0	0	0	0	0	0	0	0	0	0	0	1	0	0	0	0	0
OTU_4103	Bacteria	Proteobacteria	Alphaproteobacteria	Rickettsiales	Mitochondria	Unclassified	Unclassified	0	0	0	0	0	0	0	0	0	0	0	0	0	0	0	0	0	0	5	0	0	0	0	0
OTU_4106	Bacteria	Proteobacteria	Alphaproteobacteria	SAR11 clade	Deep 1	Unclassified	Unclassified	0	0	0	0	0	0	0	0	0	0	0	0	0	1	0	0	0	0	0	0	0	0	0	0
OTU_4108	Bacteria	Proteobacteria	Alphaproteobacteria	Rhodospirillales	Rhodospirillaceae	uncultured	Unclassified	0	0	1	0	1	1	0	0	0	0	0	0	0	0	0	0	1	0	0	0	0	0	1	1
OTU_4114	Bacteria	Proteobacteria	Alphaproteobacteria	Unclassified	Unclassified	Unclassified	Unclassified	0	0	0	0	0	0	0	0	0	0	0	0	0	0	0	0	2	0	0	0	0	0	0	0
OTU_4123	Bacteria	Proteobacteria	Alphaproteobacteria	Rickettsiales	Mitochondria	uncultured bacterium	uncultured bacterium	0	0	0	0	0	0	0	0	0	0	0	0	0	0	0	0	0	0	0	1	0	0	0	0
OTU_4126	Bacteria	Proteobacteria	Alphaproteobacteria	Rickettsiales	LWSR-14	uncultured bacterium	uncultured bacterium	0	0	0	0	0	0	0	0	0	0	0	0	0	0	0	2	0	0	0	0	0	0	0	0
OTU_4133	Bacteria	Proteobacteria	Alphaproteobacteria	SAR11 clade	Surface 1	Unclassified	Unclassified	0	0	0	0	0	0	0	0	0	0	0	0	0	2	0	0	0	0	0	0	0	0	0	0
OTU_4137	Bacteria	Proteobacteria	Alphaproteobacteria	SAR11 clade	Deep 1	uncultured bacterium HF0770_37D02	uncultured bacterium HF0770_37D02	0	0	0	0	0	0	0	0	0	0	0	0	0	1	0	0	0	0	0	0	0	0	0	0
OTU_4143	Bacteria	Proteobacteria	Alphaproteobacteria	Rhodospirillales	Rhodospirillaceae	Defluviicoccus	Unclassified	0	0	0	0	1	2	0	0	0	0	0	0	0	0	2	0	0	2	0	0	0	0	0	0
OTU_4152	Bacteria	Proteobacteria	Alphaproteobacteria	Rhodobacterales	Rhodobacteraceae	Unclassified	Unclassified	0	0	0	0	0	0	0	0	0	0	0	0	0	0	0	0	1	0	0	0	0	0	0	0
OTU_4156	Bacteria	Proteobacteria	Alphaproteobacteria	Rhodobacterales	Rhodobacteraceae	Unclassified	Unclassified	0	0	0	0	0	0	0	0	0	0	0	0	0	0	0	0	2	0	0	0	0	0	0	0
OTU_4159	Bacteria	Proteobacteria	Alphaproteobacteria	SAR11 clade	Deep 1	uncultured bacterium	uncultured bacterium	8	147	35	10	30	23	1	0	39	0	3	1	2	57	60	17	14	32	0	16	40	0	4	21
OTU_416	Bacteria	Proteobacteria	Alphaproteobacteria	Rhizobiales	Aurantimonadaceae	Aurantimonas	uncultured Aurantimonas sp.	0	0	0	2	0	1	0	0	0	0	0	3	0	0	0	6	1	3	7	0	0	0	0	0
OTU_4163	Bacteria	Proteobacteria	Alphaproteobacteria	SAR11 clade	Deep 1	uncultured alpha proteobacterium	uncultured alpha proteobacterium	0	13	12	0	7	1	0	0	7	0	0	0	0	13	18	2	0	0	0	2	7	0	1	0
OTU_4174	Bacteria	Proteobacteria	Alphaproteobacteria	Sphingomonadales	Erythrobacteraceae	Unclassified	Unclassified	0	0	0	0	0	1	0	0	0	0	0	1	0	0	0	0	1	0	1	0	0	0	0	0
OTU_4183	Bacteria	Proteobacteria	Alphaproteobacteria	Rhizobiales	Phyllobacteriaceae	Hoeflea	uncultured Hoeflea sp.	0	0	0	0	0	0	0	0	0	0	0	0	0	0	0	0	0	0	0	0	0	1	0	0
OTU_4186	Bacteria	Proteobacteria	Alphaproteobacteria	SAR11 clade	Deep 1	Unclassified	Unclassified	0	0	0	0	0	0	0	0	0	0	0	0	0	0	0	0	0	0	0	0	0	0	0	1
OTU_4189	Bacteria	Proteobacteria	Alphaproteobacteria	Rhodospirillales	Rhodospirillaceae	AEGEAN-169 marine group	uncultured bacterium	0	6	1	0	0	1	0	0	0	0	0	0	0	6	1	0	0	3	0	0	0	0	0	0
OTU_4195	Bacteria	Proteobacteria	Alphaproteobacteria	Rhodospirillales	Rhodospirillaceae	uncultured	uncultured Pelagibius sp.	0	0	0	0	0	1	0	0	0	0	0	0	0	0	0	0	0	0	0	0	0	0	0	1
OTU_4198	Bacteria	Proteobacteria	Alphaproteobacteria	OCS116 clade	unidentified marine bacterioplankton	unidentified marine bacterioplankton	unidentified marine bacterioplankton	0	0	0	0	0	0	0	0	0	0	0	0	1	0	0	0	0	0	0	0	0	0	0	0
OTU_42	Bacteria	Proteobacteria	Alphaproteobacteria	Rhodobacterales	Rhodobacteraceae	Unclassified	Unclassified	5	2	5	259	12	3	0	5	31	86	13	3	2	12	0	4	33	2	58	132	14	7	12	0
OTU_4206	Bacteria	Proteobacteria	Alphaproteobacteria	SAR11 clade	Surface 1	Unclassified	Unclassified	0	0	0	0	0	0	0	0	0	0	0	0	0	1	0	0	0	0	0	0	0	0	0	0
OTU_4212	Bacteria	Proteobacteria	Alphaproteobacteria	SAR11 clade	Surface 1	Candidatus Pelagibacter	uncultured bacterium	41	32	8	0	1	1	9	0	8	0	0	0	13	29	9	1	2	3	7	3	1	0	3	2
OTU_4228	Bacteria	Proteobacteria	Alphaproteobacteria	Rhodobacterales	Rhodobacteraceae	Unclassified	Unclassified	0	0	0	0	1	0	0	0	0	0	0	0	0	0	0	0	0	0	0	0	0	0	0	0
OTU_4229	Bacteria	Proteobacteria	Alphaproteobacteria	Rhodobacterales	Rhodobacteraceae	Unclassified	Unclassified	0	0	0	0	1	0	0	0	0	0	0	0	0	0	0	0	0	0	0	0	0	0	0	0
OTU_4234	Bacteria	Proteobacteria	Alphaproteobacteria	SAR11 clade	Deep 1	Unclassified	Unclassified	0	1	0	0	0	0	0	0	0	0	0	0	0	0	0	0	0	0	0	0	0	0	0	0
OTU_4239	Bacteria	Proteobacteria	Alphaproteobacteria	Rhodobacterales	Rhodobacteraceae	Unclassified	Unclassified	0	0	0	0	0	1	0	0	0	0	0	0	0	0	0	0	0	0	0	0	0	0	0	0
OTU_4242	Bacteria	Proteobacteria	Alphaproteobacteria	Sphingomonadales	Unclassified	Unclassified	Unclassified	0	0	0	0	0	1	0	0	0	0	0	0	0	0	0	0	0	0	0	0	0	0	0	0
OTU_4257	Bacteria	Proteobacteria	Alphaproteobacteria	Rickettsiales	Unclassified	Unclassified	Unclassified	0	0	0	0	0	0	0	0	0	0	0	0	0	0	0	0	0	0	4	0	0	0	0	0
OTU_426	Bacteria	Proteobacteria	Alphaproteobacteria	Sneathiellales	Sneathiellaceae	uncultured	uncultured alpha proteobacterium	0	0	0	0	5	4	0	0	0	0	0	0	0	0	5	6	0	1	0	0	0	0	0	0
OTU_4269	Bacteria	Proteobacteria	Alphaproteobacteria	Sphingomonadales	Sphingomonadaceae	Sphingomonas	uncultured Sphingomonas sp.	0	0	0	0	7	1	0	1	1	3	2	0	0	0	0	1	0	0	0	2	1	0	2	3
OTU_4270	Bacteria	Proteobacteria	Alphaproteobacteria	Rhodobacterales	Rhodobacteraceae	Ruegeria	Unclassified	0	0	0	0	0	0	0	0	0	1	0	0	0	0	0	0	0	0	0	0	0	0	0	0
OTU_4271	Bacteria	Proteobacteria	Alphaproteobacteria	Sphingomonadales	Erythrobacteraceae	Unclassified	Unclassified	0	0	0	0	0	1	0	0	0	0	0	0	0	0	0	2	0	0	0	0	0	0	0	0
OTU_4273	Bacteria	Proteobacteria	Alphaproteobacteria	DB1-14	unidentified marine bacterioplankton	unidentified marine bacterioplankton	unidentified marine bacterioplankton	0	0	0	0	0	0	0	0	0	0	0	0	0	0	0	0	1	0	0	0	0	0	0	0
OTU_4277	Bacteria	Proteobacteria	Alphaproteobacteria	Rhizobiales	Phyllobacteriaceae	Unclassified	Unclassified	0	0	0	1	0	0	0	0	0	0	0	0	0	0	0	0	0	0	0	0	0	0	0	0
OTU_4281	Bacteria	Proteobacteria	Alphaproteobacteria	Rickettsiales	Mitochondria	Unclassified	Unclassified	0	0	0	0	0	0	0	0	0	0	0	0	0	0	0	0	0	0	1	0	0	0	0	0
OTU_4287	Bacteria	Proteobacteria	Alphaproteobacteria	SAR11 clade	Deep 1	uncultured marine bacterium	uncultured marine bacterium	0	0	0	0	1	0	0	0	0	0	0	0	0	0	1	0	0	0	0	0	0	0	0	0
OTU_429	Bacteria	Proteobacteria	Alphaproteobacteria	Rickettsiales	LWSR-14	Unclassified	Unclassified	0	0	0	0	0	0	0	0	7	0	0	0	0	0	0	0	0	0	12	0	0	0	0	0
OTU_4293	Bacteria	Proteobacteria	Alphaproteobacteria	Rhizobiales	Unclassified	Unclassified	Unclassified	0	0	0	0	0	0	0	0	0	0	0	0	0	0	0	0	0	0	0	1	0	0	0	0
OTU_4296	Bacteria	Proteobacteria	Alphaproteobacteria	Rhodobacterales	Rhodobacteraceae	Unclassified	Unclassified	0	0	0	0	2	0	0	0	0	0	0	0	0	0	0	0	2	0	0	0	0	1	3	0
OTU_43	Bacteria	Proteobacteria	Alphaproteobacteria	Rhizobiales	Phyllobacteriaceae	Ahrensia	Ahrensia sp. 0C-1	0	0	2	14	160	10	0	0	2	1	36	16	0	0	8	8	5	0	0	0	4	4	0	0
OTU_4300	Bacteria	Proteobacteria	Alphaproteobacteria	Rhizobiales	Unclassified	Unclassified	Unclassified	0	0	0	0	0	0	0	0	0	0	0	0	0	0	0	0	0	0	0	0	1	0	0	0
OTU_4307	Bacteria	Proteobacteria	Alphaproteobacteria	Rhizobiales	Phyllobacteriaceae	Unclassified	Unclassified	0	0	0	0	0	0	0	0	0	0	0	0	0	0	0	0	0	0	0	0	0	1	0	0
OTU_4308	Bacteria	Proteobacteria	Alphaproteobacteria	Rhizobiales	Unclassified	Unclassified	Unclassified	0	0	0	0	0	0	0	0	0	0	0	0	0	0	0	0	0	0	0	0	0	1	0	0
OTU_4310	Bacteria	Proteobacteria	Alphaproteobacteria	SAR11 clade	Deep 1	Unclassified	Unclassified	0	10	2	0	0	0	0	0	0	0	0	0	0	1	1	0	0	0	0	0	0	0	0	0
OTU_4312	Bacteria	Proteobacteria	Alphaproteobacteria	Rhizobiales	Phyllobacteriaceae	Unclassified	Unclassified	0	0	0	0	0	0	0	0	0	0	0	0	0	0	0	0	0	0	0	0	0	7	0	0
OTU_4315	Bacteria	Proteobacteria	Alphaproteobacteria	SAR11 clade	uncultured SAR11 cluster alpha proteobacterium	uncultured SAR11 cluster alpha proteobacterium	uncultured SAR11 cluster alpha proteobacterium	4	1	1	1	1	0	1	0	0	0	0	0	0	2	0	0	0	0	2	0	0	0	0	0
OTU_4317	Bacteria	Proteobacteria	Alphaproteobacteria	Rhodospirillales	Rhodospirillaceae	AEGEAN-169 marine group	alpha proteobacterium SCGC AB-629-F11	0	1	0	0	0	0	0	0	0	0	0	0	0	0	0	0	0	0	0	0	0	0	0	0
OTU_4330	Bacteria	Proteobacteria	Alphaproteobacteria	Rhizobiales	Unclassified	Unclassified	Unclassified	0	0	0	0	0	1	0	0	0	0	0	0	0	0	0	0	0	0	0	0	0	0	0	0
OTU_4335	Bacteria	Proteobacteria	Alphaproteobacteria	Rhizobiales	Phyllobacteriaceae	Unclassified	Unclassified	0	0	0	0	2	0	0	0	0	0	0	0	0	0	0	0	2	0	0	0	0	0	0	0
OTU_4338	Bacteria	Proteobacteria	Alphaproteobacteria	Rhizobiales	Unclassified	Unclassified	Unclassified	0	0	0	0	0	0	0	0	2	0	0	0	0	0	0	0	0	0	0	0	0	0	0	0
OTU_4341	Bacteria	Proteobacteria	Alphaproteobacteria	Rhizobiales	Methylobacteriaceae	Methylobacterium	Unclassified	0	0	0	0	0	1	0	0	0	0	0	0	0	0	0	1	0	0	0	0	0	0	0	0
OTU_4344	Bacteria	Proteobacteria	Alphaproteobacteria	Rhodobacterales	Rhodobacteraceae	Unclassified	Unclassified	0	0	0	0	0	0	0	2	0	0	0	0	0	0	0	0	0	0	0	0	0	0	0	0
OTU_4348	Bacteria	Proteobacteria	Alphaproteobacteria	Rhodobacterales	Rhodobacteraceae	Unclassified	Unclassified	0	0	0	0	0	0	0	0	1	0	0	0	0	0	0	0	0	0	0	0	0	0	0	0
OTU_4349	Bacteria	Proteobacteria	Alphaproteobacteria	Unclassified	Unclassified	Unclassified	Unclassified	0	0	0	0	0	0	0	0	0	0	0	0	0	0	0	0	0	0	0	0	0	0	0	3
OTU_435	Bacteria	Proteobacteria	Alphaproteobacteria	Rickettsiales	SM2D12	Unclassified	Unclassified	0	0	8	0	0	0	0	0	5	0	0	0	0	2	0	0	0	0	0	0	0	0	0	0
OTU_4350	Bacteria	Proteobacteria	Alphaproteobacteria	Rhodospirillales	Unclassified	Unclassified	Unclassified	0	0	0	0	0	0	0	0	0	0	0	0	0	0	0	0	0	0	0	0	0	0	0	1
OTU_4353	Bacteria	Proteobacteria	Alphaproteobacteria	Rhodobacterales	Rhodobacteraceae	uncultured	unidentified marine bacterioplankton	0	0	0	0	0	0	0	0	0	0	0	0	1	0	0	0	0	0	0	0	0	0	0	0
OTU_4355	Bacteria	Proteobacteria	Alphaproteobacteria	Rickettsiales	Mitochondria	uncultured bacterium	uncultured bacterium	0	0	0	0	0	0	0	0	0	0	0	0	1	0	0	0	0	0	0	0	0	0	0	0
OTU_436	Bacteria	Proteobacteria	Alphaproteobacteria	Rhodospirillales	Rhodospirillaceae	Thalassospira	Unclassified	0	0	2	0	0	0	0	0	2	0	0	0	0	0	0	1	0	0	27	0	0	0	0	0
OTU_4361	Bacteria	Proteobacteria	Alphaproteobacteria	Rhodobacterales	Rhodobacteraceae	Unclassified	Unclassified	3	0	0	0	0	3	0	0	0	0	0	10	0	0	0	0	2	7	0	0	0	0	3	31
OTU_4364	Bacteria	Proteobacteria	Alphaproteobacteria	Rickettsiales	Unclassified	Unclassified	Unclassified	0	0	0	0	0	0	0	0	0	0	0	0	0	0	0	0	0	0	0	3	0	0	0	0
OTU_4376	Bacteria	Proteobacteria	Alphaproteobacteria	SAR11 clade	Deep 1	uncultured bacterium HF0770_37D02	uncultured bacterium HF0770_37D02	0	0	0	0	0	0	0	0	0	0	0	0	0	1	0	0	0	0	0	0	0	0	0	0
OTU_4377	Bacteria	Proteobacteria	Alphaproteobacteria	Rhizobiales	Unclassified	Unclassified	Unclassified	0	0	0	1	2	1	1	8	14	4	7	13	0	1	0	10	5	3	26	15	18	0	10	9
OTU_438	Bacteria	Proteobacteria	Alphaproteobacteria	Rhodospirillales	Rhodospirillaceae	uncultured	uncultured alpha proteobacterium	0	2	0	0	8	1	0	0	4	0	0	0	0	3	6	0	1	7	0	0	0	0	3	16
OTU_4383	Bacteria	Proteobacteria	Alphaproteobacteria	Sphingomonadales	Sphingomonadaceae	Novosphingobium	Unclassified	0	0	0	0	0	0	0	0	0	0	0	0	0	0	0	0	0	0	1	0	0	0	0	0
OTU_4388	Bacteria	Proteobacteria	Alphaproteobacteria	Rhizobiales	Methylobacteriaceae	Methylobacterium	Unclassified	0	0	0	0	0	0	0	0	0	0	0	0	0	0	0	0	0	0	1	0	0	0	0	0
OTU_439	Bacteria	Proteobacteria	Alphaproteobacteria	Rickettsiales	Rickettsiaceae	uncultured	uncultured alpha proteobacterium	0	0	0	0	0	1	0	0	0	0	0	3	0	0	0	1	0	0	0	0	0	0	0	20
OTU_4390	Bacteria	Proteobacteria	Alphaproteobacteria	Rickettsiales	Rickettsiaceae	uncultured	endosymbiont of Euplotes octocarinatus FL(12)-VI	0	0	0	0	0	0	0	0	0	0	0	0	0	0	0	0	0	0	1	0	0	0	0	0
OTU_4402	Bacteria	Proteobacteria	Alphaproteobacteria	Rhodobacterales	Rhodobacteraceae	Unclassified	Unclassified	0	0	0	0	0	0	0	0	0	0	0	0	0	0	0	0	0	0	0	0	0	1	0	0
OTU_4403	Bacteria	Proteobacteria	Alphaproteobacteria	Rhizobiales	Phyllobacteriaceae	Unclassified	Unclassified	0	0	0	0	0	0	0	0	0	0	0	0	0	0	0	0	0	0	0	0	0	3	0	0
OTU_4404	Bacteria	Proteobacteria	Alphaproteobacteria	Rhizobiales	Hyphomicrobiaceae	Maritalea	uncultured marine bacterium	0	0	0	0	0	0	0	0	1	0	0	0	0	0	0	0	0	0	0	0	0	0	0	0
OTU_4406	Bacteria	Proteobacteria	Alphaproteobacteria	Rhodospirillales	Rhodospirillaceae	Unclassified	Unclassified	0	0	0	0	0	0	0	0	0	0	0	0	0	0	2	0	0	0	0	0	0	0	0	0
OTU_441	Bacteria	Proteobacteria	Alphaproteobacteria	Unclassified	Unclassified	Unclassified	Unclassified	23	0	1	0	0	0	0	0	0	0	0	0	0	0	0	0	0	0	0	0	0	0	0	0
OTU_4412	Bacteria	Proteobacteria	Alphaproteobacteria	Sphingomonadales	Unclassified	Unclassified	Unclassified	0	0	0	0	0	0	0	1	0	0	0	1	0	0	0	0	0	0	0	0	0	0	0	0
OTU_4414	Bacteria	Proteobacteria	Alphaproteobacteria	Caulobacterales	Hyphomonadaceae	Henriciella	unidentified marine bacterioplankton	0	25	7	3	10	4	0	27	16	0	2	4	0	5	0	4	6	4	3	37	0	0	7	5
OTU_4418	Bacteria	Proteobacteria	Alphaproteobacteria	Rhodospirillales	AT-s3-44	uncultured organism	uncultured organism	0	0	2	0	0	0	0	0	0	0	0	0	0	0	0	0	0	0	0	0	0	0	0	0
OTU_442	Bacteria	Proteobacteria	Alphaproteobacteria	Rhizobiales	Hyphomicrobiaceae	Filomicrobium	uncultured marine bacterium	0	0	0	0	0	0	0	0	2	0	0	0	0	0	0	0	0	0	14	0	0	0	0	0
OTU_4425	Bacteria	Proteobacteria	Alphaproteobacteria	Rickettsiales	Mitochondria	Unclassified	Unclassified	0	0	0	0	0	0	0	0	0	0	0	0	1	0	0	0	0	0	0	0	0	0	0	1
OTU_4432	Bacteria	Proteobacteria	Alphaproteobacteria	Rhodobacterales	Rhodobacteraceae	Unclassified	Unclassified	0	0	0	0	0	1	0	0	0	0	0	0	0	0	0	0	0	0	0	0	0	0	1	0
OTU_4439	Bacteria	Proteobacteria	Alphaproteobacteria	SAR11 clade	Deep 1	Unclassified	Unclassified	0	0	0	0	0	0	0	0	0	0	0	0	0	1	0	0	0	0	0	0	0	0	0	0
OTU_4449	Bacteria	Proteobacteria	Alphaproteobacteria	Rickettsiales	Unclassified	Unclassified	Unclassified	0	0	0	0	0	0	0	0	0	0	0	0	0	0	0	0	0	0	0	0	0	0	0	2
OTU_4453	Bacteria	Proteobacteria	Alphaproteobacteria	Rhizobiales	Phyllobacteriaceae	Unclassified	Unclassified	0	0	0	0	0	0	0	0	0	0	0	0	0	0	0	0	0	0	0	0	0	1	0	0
OTU_4456	Bacteria	Proteobacteria	Alphaproteobacteria	Sphingomonadales	Erythrobacteraceae	Altererythrobacter	uncultured organism	0	0	0	1	4	10	0	0	0	1	1	3	0	0	0	1	0	4	1	0	1	8	0	3
OTU_4462	Bacteria	Proteobacteria	Alphaproteobacteria	SAR11 clade	Surface 1	marine metagenome	marine metagenome	0	0	0	0	0	0	0	0	0	0	0	0	0	0	1	0	0	0	0	0	0	0	0	0
OTU_4463	Bacteria	Proteobacteria	Alphaproteobacteria	Rhodobacterales	Rhodobacteraceae	Unclassified	Unclassified	15	1	0	64	69	27	0	2	0	12	5	5	1	1	1	34	109	126	0	0	5	76	7	58
OTU_4478	Bacteria	Proteobacteria	Alphaproteobacteria	Rhodobacterales	Rhodobacteraceae	Ruegeria	Unclassified	0	0	0	0	0	0	0	0	1	0	0	0	0	0	0	0	0	0	0	0	0	0	0	0
OTU_449	Bacteria	Proteobacteria	Alphaproteobacteria	Rhodospirillales	Rhodospirillales Incertae Sedis	Reyranella	Unclassified	0	0	0	0	0	0	0	0	0	0	0	0	0	0	0	0	2	0	0	0	0	0	10	0
OTU_4491	Bacteria	Proteobacteria	Alphaproteobacteria	Sphingomonadales	Sphingomonadaceae	Sphingopyxis	uncultured bacterium	0	0	0	0	0	1	0	0	0	0	0	1	0	0	0	1	0	0	0	0	1	0	2	0
OTU_4494	Bacteria	Proteobacteria	Alphaproteobacteria	Rhodobacterales	Rhodobacteraceae	Unclassified	Unclassified	0	0	0	0	0	0	0	0	0	0	0	0	0	0	0	0	0	0	0	0	1	0	0	0
OTU_4502	Bacteria	Proteobacteria	Alphaproteobacteria	Rhodospirillales	Rhodospirillaceae	Defluviicoccus	uncultured bacterium	0	1	1	0	0	3	0	0	0	0	0	0	0	1	0	0	0	0	0	0	0	0	0	0
OTU_4503	Bacteria	Proteobacteria	Alphaproteobacteria	Rhodospirillales	Rhodospirillaceae	uncultured	uncultured deep-sea bacterium	0	0	1	0	1	0	0	0	0	0	0	0	0	0	1	0	0	2	0	0	0	0	0	0
OTU_4504	Bacteria	Proteobacteria	Alphaproteobacteria	Rhodobacterales	Rhodobacteraceae	Unclassified	Unclassified	0	0	0	1	1	0	0	0	0	0	0	0	0	0	0	0	0	0	0	0	0	0	0	0
OTU_4507	Bacteria	Proteobacteria	Alphaproteobacteria	Rhodobacterales	Rhodobacteraceae	Tropicimonas	uncultured bacterium	0	0	0	0	4	8	0	0	0	0	0	2	0	0	1	1	1	0	0	0	0	0	1	3
OTU_4521	Bacteria	Proteobacteria	Alphaproteobacteria	Rickettsiales	Rickettsiaceae	uncultured	Unclassified	0	0	0	0	0	0	0	0	1	0	0	0	0	0	0	0	0	0	0	0	0	0	0	0
OTU_4526	Bacteria	Proteobacteria	Alphaproteobacteria	Rhodobacterales	Rhodobacteraceae	Labrenzia	Unclassified	0	0	0	0	0	0	0	0	1	0	0	0	0	0	0	0	0	0	0	0	0	0	0	1
OTU_4532	Bacteria	Proteobacteria	Alphaproteobacteria	Sphingomonadales	Sphingomonadaceae	uncultured	Unclassified	0	0	0	0	0	0	1	0	0	0	0	0	0	0	0	0	0	0	0	0	0	0	0	0
OTU_4540	Bacteria	Proteobacteria	Alphaproteobacteria	Rickettsiales	S25-593	uncultured Rickettsiales bacterium	uncultured Rickettsiales bacterium	0	0	0	0	0	1	0	0	0	0	0	0	0	0	0	0	0	0	0	0	0	0	0	0
OTU_455	Bacteria	Proteobacteria	Alphaproteobacteria	SAR11 clade	Deep 1	uncultured bacterium	uncultured bacterium	1	9	0	0	0	0	0	0	3	0	0	0	0	4	5	0	0	0	0	0	0	0	0	0
OTU_4551	Bacteria	Proteobacteria	Alphaproteobacteria	SAR11 clade	Unclassified	Unclassified	Unclassified	2	1	1	0	0	0	0	0	0	0	0	0	0	0	1	0	0	0	0	0	0	0	0	0
OTU_4554	Bacteria	Proteobacteria	Alphaproteobacteria	Rickettsiales	Mitochondria	Unclassified	Unclassified	0	0	0	0	2	0	0	0	0	0	0	0	0	0	0	0	0	0	0	0	0	0	0	0
OTU_4555	Bacteria	Proteobacteria	Alphaproteobacteria	SAR11 clade	Deep 1	uncultured alpha proteobacterium	uncultured alpha proteobacterium	0	0	0	0	0	1	0	0	0	0	0	0	0	0	0	0	0	0	0	0	0	0	0	0
OTU_4576	Bacteria	Proteobacteria	Alphaproteobacteria	Rhizobiales	Hyphomicrobiaceae	Pelagibacterium	Flavobacteriaceae bacterium UJ101	0	0	0	0	0	0	0	0	0	0	0	0	0	0	0	0	0	0	2	0	0	0	0	0
OTU_4579	Bacteria	Proteobacteria	Alphaproteobacteria	Sphingomonadales	Erythrobacteraceae	Erythrobacter	uncultured Sphingomonadales bacterium	0	0	0	0	0	0	0	0	0	0	0	0	0	0	0	0	0	0	1	1	0	0	0	0
OTU_4587	Bacteria	Proteobacteria	Alphaproteobacteria	Rickettsiales	Mitochondria	uncultured bacterium	uncultured bacterium	0	0	0	0	0	0	0	0	0	0	0	0	0	0	0	0	0	0	0	0	0	0	0	2
OTU_4589	Bacteria	Proteobacteria	Alphaproteobacteria	Rhodobacterales	Rhodobacteraceae	Unclassified	Unclassified	0	0	0	0	0	0	0	0	0	0	0	0	0	0	0	0	0	0	0	0	0	2	0	0
OTU_4591	Bacteria	Proteobacteria	Alphaproteobacteria	Rickettsiales	Mitochondria	Unclassified	Unclassified	0	0	0	0	0	0	0	0	0	0	0	0	0	0	1	0	0	0	0	0	0	0	2	0
OTU_4599	Bacteria	Proteobacteria	Alphaproteobacteria	Sphingomonadales	Unclassified	Unclassified	Unclassified	0	0	0	0	0	0	0	0	0	0	0	0	0	0	0	0	0	0	1	0	0	0	0	0
OTU_46	Bacteria	Proteobacteria	Alphaproteobacteria	Caulobacterales	Hyphomonadaceae	Ponticaulis	uncultured alpha proteobacterium	0	5	2	3	38	101	0	2	11	1	1	9	3	3	15	1	2	43	0	25	0	1	2	11
OTU_4602	Bacteria	Proteobacteria	Alphaproteobacteria	Rickettsiales	Rickettsiales Incertae Sedis	Candidatus Lariskella	uncultured Rickettsiales bacterium	0	0	0	0	0	0	0	0	0	0	0	0	0	0	0	0	0	0	1	0	0	0	0	0
OTU_4603	Bacteria	Proteobacteria	Alphaproteobacteria	Rhodobacterales	Rhodobacteraceae	Unclassified	Unclassified	0	0	0	0	1	0	0	0	0	0	0	0	0	0	0	0	0	0	0	0	0	0	0	0
OTU_461	Bacteria	Proteobacteria	Alphaproteobacteria	Rhizobiales	Rhodobiaceae	uncultured	uncultured Rhizobiales bacterium	0	0	0	0	0	1	0	0	1	0	0	11	0	0	0	0	0	0	0	0	0	0	0	0
OTU_4620	Bacteria	Proteobacteria	Alphaproteobacteria	Rickettsiales	Mitochondria	uncultured bacterium	uncultured bacterium	1	0	0	0	0	0	0	0	0	0	0	0	0	0	0	0	0	0	0	0	0	0	0	0
OTU_4640	Bacteria	Proteobacteria	Alphaproteobacteria	Unclassified	Unclassified	Unclassified	Unclassified	0	0	0	0	0	0	0	0	0	0	0	0	0	1	0	0	0	0	0	0	0	0	0	0
OTU_4642	Bacteria	Proteobacteria	Alphaproteobacteria	Sphingomonadales	Unclassified	Unclassified	Unclassified	0	0	0	0	0	1	0	0	0	0	0	0	0	0	0	0	1	0	0	0	0	0	0	0
OTU_4647	Bacteria	Proteobacteria	Alphaproteobacteria	SAR11 clade	Deep 1	Unclassified	Unclassified	0	0	0	0	0	1	0	0	0	0	0	0	0	0	0	0	0	0	0	0	0	0	0	0
OTU_4648	Bacteria	Proteobacteria	Alphaproteobacteria	SAR11 clade	Surface 1	uncultured marine microorganism	uncultured marine microorganism	0	7	10	1	4	10	0	0	1	0	0	1	0	2	11	1	8	4	0	0	4	0	2	2
OTU_465	Bacteria	Proteobacteria	Alphaproteobacteria	Rhizobiales	Methylobacteriaceae	Methylobacterium	uncultured organism	0	0	0	3	1	0	0	0	0	0	10	0	0	0	0	0	0	0	0	1	0	0	0	0
OTU_4651	Bacteria	Proteobacteria	Alphaproteobacteria	Rhizobiales	Bradyrhizobiaceae	Unclassified	Unclassified	0	0	0	0	0	0	1	0	0	0	0	0	0	0	0	0	0	0	0	0	0	0	0	0
OTU_4654	Bacteria	Proteobacteria	Alphaproteobacteria	Rickettsiales	Mitochondria	Unclassified	Unclassified	0	0	0	0	0	0	0	0	0	0	0	0	0	0	0	0	2	0	0	0	0	0	0	0
OTU_4655	Bacteria	Proteobacteria	Alphaproteobacteria	Rhizobiales	Rhodobiaceae	Anderseniella	uncultured cyanobacterium	0	0	0	0	0	0	0	0	0	0	0	0	0	0	0	0	0	0	1	0	0	0	0	0
OTU_4661	Bacteria	Proteobacteria	Alphaproteobacteria	Rickettsiales	LWSR-14	Sinorickettsia chlamys	Sinorickettsia chlamys	0	0	0	0	0	0	0	0	0	0	0	0	0	0	0	0	1	0	0	0	0	0	0	0
OTU_4664	Bacteria	Proteobacteria	Alphaproteobacteria	Rickettsiales	Rickettsiales Incertae Sedis	Candidatus Lariskella	uncultured Rickettsiales bacterium	0	0	0	0	0	0	0	0	0	0	0	0	1	0	0	0	0	1	0	0	0	0	0	0
OTU_4666	Bacteria	Proteobacteria	Alphaproteobacteria	DB1-14	uncultured organism	uncultured organism	uncultured organism	0	0	0	0	0	0	0	0	0	0	0	0	0	0	1	0	0	30	0	0	0	0	0	0
OTU_4668	Bacteria	Proteobacteria	Alphaproteobacteria	Rhodospirillales	Rhodospirillaceae	uncultured	marine metagenome	0	3	1	0	0	0	0	0	0	0	0	0	1	2	0	0	0	0	1	0	0	0	0	0
OTU_469	Bacteria	Proteobacteria	Alphaproteobacteria	Rhodobacterales	Rhodobacteraceae	Sedimentitalea	uncultured bacterium	0	0	0	0	0	0	0	0	0	0	0	0	0	0	0	0	0	0	0	0	0	0	0	13
OTU_4694	Bacteria	Proteobacteria	Alphaproteobacteria	Rhodobacterales	Rhodobacteraceae	Unclassified	Unclassified	0	0	0	0	0	0	0	0	0	0	0	0	0	0	0	1	0	0	0	0	0	0	0	0
OTU_4703	Bacteria	Proteobacteria	Alphaproteobacteria	Rhodobacterales	Rhodobacteraceae	Unclassified	Unclassified	0	0	0	0	0	0	0	0	0	0	0	0	0	0	0	0	2	0	0	0	0	0	0	0
OTU_4705	Bacteria	Proteobacteria	Alphaproteobacteria	SAR11 clade	Surface 1	Unclassified	Unclassified	7	10	1	0	0	0	0	0	7	0	0	0	0	6	7	0	0	0	0	1	0	0	0	0
OTU_471	Bacteria	Proteobacteria	Alphaproteobacteria	SAR11 clade	Surface 1	uncultured marine microorganism	uncultured marine microorganism	0	0	4	0	4	4	0	0	0	0	0	0	0	0	1	0	0	0	0	0	6	0	0	0
OTU_4710	Bacteria	Proteobacteria	Alphaproteobacteria	Rhodobacterales	Rhodobacteraceae	Unclassified	Unclassified	0	0	0	0	0	0	0	0	1	0	0	0	0	0	0	0	1	0	0	0	0	0	0	0
OTU_4717	Bacteria	Proteobacteria	Alphaproteobacteria	Rhodospirillales	Rhodospirillaceae	Defluviicoccus	uncultured deep-sea bacterium	0	0	0	0	0	1	0	0	0	0	0	0	0	0	0	0	1	1	0	0	0	0	0	0
OTU_472	Bacteria	Proteobacteria	Alphaproteobacteria	Rhodospirillales	Rhodospirillaceae	Defluviicoccus	Unclassified	0	1	5	0	0	12	0	0	0	0	0	0	0	0	7	1	0	4	0	0	0	0	0	0
OTU_4723	Bacteria	Proteobacteria	Alphaproteobacteria	Rhodobacterales	Rhodobacteraceae	Unclassified	Unclassified	0	0	0	0	0	0	0	0	0	0	0	0	0	0	0	0	2	0	0	0	0	0	1	0
OTU_4726	Bacteria	Proteobacteria	Alphaproteobacteria	Rhodobacterales	Rhodobacteraceae	Unclassified	Unclassified	0	0	0	1	6	1	0	1	1	0	1	0	0	0	0	0	19	0	0	1	0	3	15	0
OTU_4731	Bacteria	Proteobacteria	Alphaproteobacteria	Caulobacterales	Hyphomonadaceae	Unclassified	Unclassified	0	0	0	0	1	0	0	0	0	0	0	0	0	0	0	0	0	0	0	0	0	0	0	0
OTU_4740	Bacteria	Proteobacteria	Alphaproteobacteria	Sphingomonadales	Unclassified	Unclassified	Unclassified	0	0	0	0	1	0	0	0	0	0	0	0	0	0	0	0	0	0	0	0	0	0	0	0
OTU_4742	Bacteria	Proteobacteria	Alphaproteobacteria	Rhizobiales	Methylobacteriaceae	Methylobacterium	Unclassified	0	0	1	1	0	0	0	0	0	0	0	4	0	0	0	1	0	0	1	2	0	0	4	1
OTU_4743	Bacteria	Proteobacteria	Alphaproteobacteria	DB1-14	uncultured bacterium	uncultured bacterium	uncultured bacterium	0	0	0	0	0	1	0	0	2	0	0	0	0	0	0	0	0	0	0	0	0	0	0	0
OTU_4755	Bacteria	Proteobacteria	Alphaproteobacteria	Rhizobiales	Methylobacteriaceae	Methylobacterium	Unclassified	0	0	0	0	0	0	0	0	0	0	1	0	0	0	0	0	0	0	0	0	0	0	0	0
OTU_4756	Bacteria	Proteobacteria	Alphaproteobacteria	Sphingomonadales	Erythrobacteraceae	Erythrobacter	Unclassified	0	0	0	0	0	0	0	0	0	0	0	1	0	0	0	0	0	0	0	0	0	0	0	0
OTU_4759	Bacteria	Proteobacteria	Alphaproteobacteria	Rhodobacterales	Rhodobacteraceae	Paracocccus	Unclassified	0	0	0	0	0	0	0	0	0	0	0	1	0	0	0	0	0	0	0	0	0	0	0	0
OTU_4777	Bacteria	Proteobacteria	Alphaproteobacteria	SAR11 clade	Deep 1	Unclassified	Unclassified	0	12	7	0	1	1	0	0	6	0	0	0	0	1	13	0	1	0	0	0	2	0	0	0
OTU_4778	Bacteria	Proteobacteria	Alphaproteobacteria	SAR11 clade	Surface 1	Unclassified	Unclassified	0	0	1	0	0	0	1	0	0	0	0	0	0	1	0	0	0	0	0	0	0	0	0	0
OTU_4783	Bacteria	Proteobacteria	Alphaproteobacteria	Rhodobacterales	Rhodobacteraceae	Unclassified	Unclassified	0	0	0	0	0	0	0	0	0	0	0	0	0	0	0	0	0	0	0	0	0	0	0	1
OTU_479	Bacteria	Proteobacteria	Alphaproteobacteria	Rhodospirillales	Rhodospirillaceae	Skermanella	uncultured bacterium	0	0	0	0	0	0	0	0	0	0	0	0	0	0	0	0	0	0	0	0	11	0	0	0
OTU_4791	Bacteria	Proteobacteria	Alphaproteobacteria	Rhodobacterales	Rhodobacteraceae	Unclassified	Unclassified	0	0	0	0	0	0	0	0	0	0	0	0	0	0	0	0	2	0	0	0	0	1	0	0
OTU_4795	Bacteria	Proteobacteria	Alphaproteobacteria	Rhodospirillales	Rhodospirillaceae	Thalassospira	alpha proteobacterium N2yML5	0	1	0	0	0	0	0	0	0	0	0	0	0	0	0	0	0	0	0	0	0	0	0	0
OTU_4799	Bacteria	Proteobacteria	Alphaproteobacteria	SAR11 clade	Surface 1	Unclassified	Unclassified	0	1	0	0	0	0	0	0	0	0	0	0	0	0	0	0	0	0	0	0	0	0	0	0
OTU_48	Bacteria	Proteobacteria	Alphaproteobacteria	Caulobacterales	Hyphomonadaceae	Hyphomonas	uncultured bacterium	5	2	0	25	86	40	1	1	35	3	37	33	2	0	11	19	76	33	8	9	16	107	41	46
OTU_480	Bacteria	Proteobacteria	Alphaproteobacteria	Rhodospirillales	Rhodospirillaceae	uncultured	uncultured alpha proteobacterium	0	38	3	0	0	0	0	3	4	0	0	0	0	13	9	0	0	3	0	0	0	0	0	0
OTU_4811	Bacteria	Proteobacteria	Alphaproteobacteria	Rickettsiales	Mitochondria	Unclassified	Unclassified	0	0	1	0	0	0	0	0	0	0	0	0	0	0	0	0	0	0	0	0	0	0	0	0
OTU_4812	Bacteria	Proteobacteria	Alphaproteobacteria	SAR11 clade	Surface 1	Unclassified	Unclassified	0	0	1	0	0	0	0	0	0	0	0	0	0	1	1	0	0	0	0	0	0	0	0	0
OTU_4814	Bacteria	Proteobacteria	Alphaproteobacteria	Rhodobacterales	Rhodobacteraceae	Unclassified	Unclassified	0	0	0	0	1	0	0	0	0	0	0	0	0	0	0	0	0	0	0	0	0	0	0	0
OTU_4817	Bacteria	Proteobacteria	Alphaproteobacteria	Rhodospirillales	Rhodospirillaceae	Defluviicoccus	uncultured organism	0	0	0	0	1	0	0	0	0	0	0	0	0	0	0	0	0	0	0	0	0	0	0	0
OTU_4819	Bacteria	Proteobacteria	Alphaproteobacteria	SAR11 clade	Deep 1	Unclassified	Unclassified	0	0	0	0	0	0	0	0	0	0	0	0	0	0	0	0	0	0	0	0	0	0	1	0
OTU_4820	Bacteria	Proteobacteria	Alphaproteobacteria	Rhizobiales	Unclassified	Unclassified	Unclassified	0	0	0	0	0	0	0	0	0	0	0	0	0	0	0	0	0	0	0	0	0	1	0	0
OTU_4825	Bacteria	Proteobacteria	Alphaproteobacteria	Caulobacterales	Hyphomonadaceae	uncultured	Unclassified	0	0	0	7	0	1	0	0	0	12	5	6	0	0	0	0	2	0	1	1	0	0	3	0
OTU_4826	Bacteria	Proteobacteria	Alphaproteobacteria	Rickettsiales	Mitochondria	uncultured bacterium	uncultured bacterium	0	0	0	0	0	0	0	0	0	0	0	0	0	0	0	0	0	0	0	0	0	0	0	2
OTU_4828	Bacteria	Proteobacteria	Alphaproteobacteria	SAR11 clade	Surface 1	Unclassified	Unclassified	0	0	1	0	0	0	0	0	0	0	0	0	0	0	1	0	0	0	0	0	0	0	0	0
OTU_483	Bacteria	Proteobacteria	Alphaproteobacteria	Rhizobiales	Rhizobiaceae	Rhizobium	Agrobacterium tumefaciens	0	0	0	0	0	0	0	3	1	0	8	9	0	1	0	0	0	0	0	0	0	0	0	0
OTU_4840	Bacteria	Proteobacteria	Alphaproteobacteria	Rhizobiales	Methylobacteriaceae	Methylobacterium	Unclassified	0	0	0	0	0	0	0	1	2	0	0	0	0	0	1	0	0	0	1	1	0	0	0	2
OTU_4850	Bacteria	Proteobacteria	Alphaproteobacteria	SAR11 clade	Surface 1	Unclassified	Unclassified	0	0	0	0	0	1	0	0	0	0	0	0	0	0	0	0	0	0	0	0	0	0	0	0
OTU_4862	Bacteria	Proteobacteria	Alphaproteobacteria	Sphingomonadales	Sphingomonadaceae	Parasphingopyxis	uncultured bacterium	0	2	0	0	0	0	0	0	0	0	0	0	0	0	0	1	1	1	0	1	0	0	0	0
OTU_4867	Bacteria	Proteobacteria	Alphaproteobacteria	Rhodobacterales	Rhodobacteraceae	uncultured	uncultured Rhodobacteraceae bacterium	0	0	0	0	0	0	0	0	0	0	0	0	0	0	0	0	0	0	1	0	0	0	0	0
OTU_4871	Bacteria	Proteobacteria	Alphaproteobacteria	SAR11 clade	Surface 1	Unclassified	Unclassified	0	1	3	0	0	0	0	0	0	0	0	0	0	0	0	0	0	0	0	0	0	0	0	0
OTU_4877	Bacteria	Proteobacteria	Alphaproteobacteria	Rhodospirillales	Rhodospirillaceae	Magnetospira	uncultured nuHF1 cluster bacterium HF0130_24M16	0	0	0	0	0	0	0	0	0	0	0	0	0	0	0	0	0	0	0	0	0	0	0	1
OTU_4879	Bacteria	Proteobacteria	Alphaproteobacteria	Rhodobacterales	Rhodobacteraceae	Unclassified	Unclassified	0	0	0	0	1	0	0	0	0	0	0	0	0	0	0	0	0	0	0	0	0	0	0	0
OTU_4885	Bacteria	Proteobacteria	Alphaproteobacteria	Rhodobacterales	Rhodobacteraceae	Rubellimicrobium	uncultured bacterium	0	0	0	0	0	0	0	0	0	0	0	0	0	0	0	0	0	0	0	0	0	0	1	0
OTU_4886	Bacteria	Proteobacteria	Alphaproteobacteria	SAR11 clade	Deep 1	Unclassified	Unclassified	0	1	0	0	0	0	0	0	0	0	0	0	0	2	1	0	0	0	0	0	1	0	0	0
OTU_4888	Bacteria	Proteobacteria	Alphaproteobacteria	Rhizobiales	Phyllobacteriaceae	Unclassified	Unclassified	0	0	0	0	0	0	0	0	0	0	0	0	0	0	0	0	0	0	0	0	0	1	0	0
OTU_489	Bacteria	Proteobacteria	Alphaproteobacteria	Caulobacterales	Caulobacteraceae	Asticcacaulis	uncultured bacterium	0	0	0	0	0	0	0	0	0	18	0	0	0	0	0	0	0	0	0	0	0	0	0	0
OTU_4900	Bacteria	Proteobacteria	Alphaproteobacteria	OCS116 clade	uncultured bacterium	uncultured bacterium	uncultured bacterium	0	0	0	0	0	0	0	0	0	0	0	2	0	0	0	0	0	0	0	0	0	0	0	0
OTU_492	Bacteria	Proteobacteria	Alphaproteobacteria	Rhodospirillales	Rhodospirillaceae	Defluviicoccus	uncultured alpha proteobacterium	0	0	0	0	1	7	0	0	0	0	0	0	0	0	0	0	1	1	0	0	0	0	0	0
OTU_4925	Bacteria	Proteobacteria	Alphaproteobacteria	SAR11 clade	Deep 1	Unclassified	Unclassified	0	0	3	0	0	0	0	0	0	0	0	0	0	0	0	0	0	1	0	0	0	0	0	0
OTU_4928	Bacteria	Proteobacteria	Alphaproteobacteria	Sphingomonadales	Erythrobacteraceae	Erythrobacter	alpha proteobacterium C17	3	1	0	4	6	4	0	5	2	2	0	7	1	0	1	5	3	2	4	5	0	1	0	0
OTU_4931	Bacteria	Proteobacteria	Alphaproteobacteria	Rickettsiales	Rickettsiales Incertae Sedis	Candidatus Lariskella	uncultured alpha proteobacterium	0	0	0	0	0	0	0	0	0	0	0	0	0	0	0	0	0	0	1	0	0	0	0	0
OTU_495	Bacteria	Proteobacteria	Alphaproteobacteria	Rhodospirillales	Rhodospirillaceae	Defluviicoccus	uncultured alpha proteobacterium	0	0	0	0	0	10	0	0	0	0	0	0	0	0	0	0	3	16	0	0	0	0	1	5
OTU_4956	Bacteria	Proteobacteria	Alphaproteobacteria	Rhizobiales	Bradyrhizobiaceae	Bradyrhizobium	Unclassified	0	0	0	0	0	0	0	0	1	0	0	0	0	0	0	0	0	0	0	0	0	0	0	0
OTU_4958	Bacteria	Proteobacteria	Alphaproteobacteria	Rhodobacterales	Rhodobacteraceae	Oceanicola	Unclassified	0	0	0	0	1	0	0	0	0	0	0	0	0	0	0	1	1	0	0	0	0	0	0	0
OTU_496	Bacteria	Proteobacteria	Alphaproteobacteria	Rickettsiales	Mitochondria	Unclassified	Unclassified	0	0	0	0	0	0	0	0	0	0	0	0	0	0	0	0	0	0	13	0	0	0	0	0
OTU_4962	Bacteria	Proteobacteria	Alphaproteobacteria	Rhodobacterales	Rhodobacteraceae	Unclassified	Unclassified	0	0	0	0	0	0	0	0	0	0	0	0	0	0	0	0	1	0	0	0	0	0	0	0
OTU_4966	Bacteria	Proteobacteria	Alphaproteobacteria	Rhizobiales	Unclassified	Unclassified	Unclassified	0	0	0	0	0	0	0	0	2	0	0	0	0	0	0	0	0	1	0	0	0	0	0	0
OTU_4971	Bacteria	Proteobacteria	Alphaproteobacteria	Rhodospirillales	Rhodospirillaceae	Defluviicoccus	uncultured alpha proteobacterium	0	0	0	0	0	1	0	0	0	0	0	0	0	0	0	0	1	0	0	0	0	0	0	0
OTU_4975	Bacteria	Proteobacteria	Alphaproteobacteria	SAR11 clade	Surface 1	uncultured bacterium	uncultured bacterium	6	4	3	0	0	0	1	1	1	0	0	0	0	2	0	0	0	0	0	0	0	0	0	0
OTU_4978	Bacteria	Proteobacteria	Alphaproteobacteria	Rhodospirillales	Rhodospirillaceae	uncultured	Unclassified	0	0	0	0	0	2	0	0	0	0	0	0	0	0	0	0	0	0	0	0	0	0	0	0
OTU_4986	Bacteria	Proteobacteria	Alphaproteobacteria	Rickettsiales	S25-593	uncultured bacterium	uncultured bacterium	0	0	0	0	0	0	0	0	0	0	0	0	1	0	0	0	0	0	0	0	0	0	0	0
OTU_4993	Bacteria	Proteobacteria	Alphaproteobacteria	Sphingomonadales	Erythrobacteraceae	Unclassified	Unclassified	0	0	0	0	0	2	0	0	0	0	0	0	0	0	0	0	0	0	0	0	1	0	0	0
OTU_50	Bacteria	Proteobacteria	Alphaproteobacteria	SAR11 clade	Deep 1	uncultured bacterium	uncultured bacterium	2	18	128	22	90	212	0	0	44	20	23	8	0	8	113	26	50	112	0	7	31	0	56	65
OTU_5000	Bacteria	Proteobacteria	Alphaproteobacteria	Rhodobacterales	Rhodobacteraceae	Ruegeria	Unclassified	0	0	0	0	0	1	0	0	0	0	0	0	0	0	0	0	0	0	0	0	0	0	0	0
OTU_5005	Bacteria	Proteobacteria	Alphaproteobacteria	Rhizobiales	Unclassified	Unclassified	Unclassified	0	0	0	0	1	0	0	0	0	0	0	0	0	0	0	0	0	0	0	0	0	0	0	0
OTU_5006	Bacteria	Proteobacteria	Alphaproteobacteria	Rhodobacterales	Rhodobacteraceae	Unclassified	Unclassified	0	0	0	0	1	0	0	0	0	0	0	0	0	0	0	0	0	0	0	0	0	0	0	0
OTU_5013	Bacteria	Proteobacteria	Alphaproteobacteria	SAR11 clade	Deep 1	uncultured alpha proteobacterium	uncultured alpha proteobacterium	0	15	13	1	3	5	0	0	10	0	0	0	0	7	9	2	3	3	0	2	3	0	1	3
OTU_5017	Bacteria	Proteobacteria	Alphaproteobacteria	Rhodobacterales	Rhodobacteraceae	Unclassified	Unclassified	0	0	0	0	0	0	0	0	0	0	0	0	0	0	0	0	1	0	0	0	0	0	0	0
OTU_5028	Bacteria	Proteobacteria	Alphaproteobacteria	Unclassified	Unclassified	Unclassified	Unclassified	0	0	0	0	0	0	0	0	1	0	0	0	0	0	0	0	0	0	0	0	0	0	0	0
OTU_503	Bacteria	Proteobacteria	Alphaproteobacteria	Rhodospirillales	Rhodospirillaceae	Thalassospira	alpha proteobacterium GMD37A6	0	0	0	0	0	0	0	0	0	0	0	0	0	0	0	0	0	0	0	0	0	19	0	0
OTU_5030	Bacteria	Proteobacteria	Alphaproteobacteria	Rhizobiales	Methylobacteriaceae	Methylobacterium	Unclassified	1	0	0	0	0	0	0	1	1	1	1	0	0	0	1	0	1	0	2	1	0	0	0	0
OTU_5031	Bacteria	Proteobacteria	Alphaproteobacteria	Sphingomonadales	Unclassified	Unclassified	Unclassified	0	0	0	0	0	0	0	0	1	0	0	0	0	0	0	0	0	0	0	0	0	0	0	0
OTU_5033	Bacteria	Proteobacteria	Alphaproteobacteria	Rhodospirillales	Rhodospirillaceae	Defluviicoccus	Unclassified	0	0	0	0	0	1	0	0	0	0	0	0	0	0	0	0	0	0	0	0	0	0	0	0
OTU_5044	Bacteria	Proteobacteria	Alphaproteobacteria	Unclassified	Unclassified	Unclassified	Unclassified	0	1	0	0	0	0	0	0	0	0	0	0	0	0	0	0	0	0	0	0	0	0	0	0
OTU_5050	Bacteria	Proteobacteria	Alphaproteobacteria	Rhodobacterales	Rhodobacteraceae	Sulfitobacter	uncultured bacterium	0	1	0	20	5	2	0	1	0	1	0	1	0	0	0	1	4	2	1	2	0	0	0	0
OTU_5052	Bacteria	Proteobacteria	Alphaproteobacteria	Rhizobiales	DUNssu371	uncultured Gemmatimonadetes bacterium	uncultured Gemmatimonadetes bacterium	0	0	0	0	0	0	0	0	0	2	0	0	0	0	0	0	0	0	0	0	0	0	0	0
OTU_507	Bacteria	Proteobacteria	Alphaproteobacteria	Rickettsiales	SAR116 clade	uncultured alpha proteobacterium	uncultured alpha proteobacterium	42	0	9	0	3	5	5	5	12	0	0	0	2	10	0	0	0	1	18	1	0	0	0	2
OTU_5071	Bacteria	Proteobacteria	Alphaproteobacteria	Rhizobiales	Aurantimonadaceae	Aureimonas	uncultured bacterium	0	0	0	0	0	1	0	0	0	0	0	0	0	0	0	0	0	0	0	0	0	0	0	0
OTU_5076	Bacteria	Proteobacteria	Alphaproteobacteria	Rhizobiales	Methylobacteriaceae	Methylobacterium	Unclassified	0	0	0	0	0	0	0	0	1	0	0	0	0	0	0	0	0	0	0	0	0	0	0	0
OTU_5086	Bacteria	Proteobacteria	Alphaproteobacteria	Rhizobiales	Phyllobacteriaceae	Unclassified	Unclassified	0	0	0	0	0	0	0	0	0	0	1	0	0	0	0	0	0	0	0	0	0	0	0	0
OTU_5094	Bacteria	Proteobacteria	Alphaproteobacteria	Sphingomonadales	Erythrobacteraceae	Erythrobacter	alpha proteobacterium C17	0	0	0	0	0	0	0	0	0	0	0	0	1	0	0	0	0	0	0	0	0	0	0	0
OTU_51	Bacteria	Proteobacteria	Alphaproteobacteria	OCS116 clade	unidentified marine bacterioplankton	unidentified marine bacterioplankton	unidentified marine bacterioplankton	83	12	2	1	4	3	18	0	0	0	0	0	41	15	0	0	0	0	13	0	0	0	0	26
OTU_5104	Bacteria	Proteobacteria	Alphaproteobacteria	SAR11 clade	Deep 1	Unclassified	Unclassified	0	4	3	7	0	0	0	0	0	0	0	0	0	2	3	0	0	0	0	0	0	0	0	0
OTU_5108	Bacteria	Proteobacteria	Alphaproteobacteria	DB1-14	uncultured bacterium	uncultured bacterium	uncultured bacterium	0	0	0	0	0	0	0	0	0	0	0	0	0	0	0	0	0	1	0	0	0	0	0	0
OTU_5123	Bacteria	Proteobacteria	Alphaproteobacteria	Rickettsiales	Mitochondria	Unclassified	Unclassified	0	0	0	0	0	0	0	0	0	0	0	0	0	0	0	0	0	0	0	0	0	0	0	1
OTU_5128	Bacteria	Proteobacteria	Alphaproteobacteria	SAR11 clade	Deep 1	uncultured organism	uncultured organism	0	2	12	1	1	5	0	0	3	0	0	0	0	5	4	0	0	5	0	4	4	0	3	2
OTU_5130	Bacteria	Proteobacteria	Alphaproteobacteria	Rhodobacterales	Rhodobacteraceae	uncultured	Rhodobacter sp. R18	0	0	0	0	0	0	0	0	0	0	0	0	0	0	0	0	0	0	0	0	0	0	1	0
OTU_5136	Bacteria	Proteobacteria	Alphaproteobacteria	SAR11 clade	Deep 1	Unclassified	Unclassified	0	1	1	0	0	0	0	0	1	0	0	0	0	0	0	0	0	0	0	0	0	0	0	0
OTU_514	Bacteria	Proteobacteria	Alphaproteobacteria	Unclassified	Unclassified	Unclassified	Unclassified	0	11	0	0	0	0	0	0	0	0	0	0	0	0	0	0	0	0	0	0	0	0	0	0
OTU_5140	Bacteria	Proteobacteria	Alphaproteobacteria	Unclassified	Unclassified	Unclassified	Unclassified	1	0	0	0	0	0	0	0	0	0	0	0	0	0	0	0	0	0	0	0	0	0	0	0
OTU_5148	Bacteria	Proteobacteria	Alphaproteobacteria	Unclassified	Unclassified	Unclassified	Unclassified	0	1	0	0	0	0	0	0	0	0	0	0	0	0	0	0	0	0	0	0	0	0	0	0
OTU_5165	Bacteria	Proteobacteria	Alphaproteobacteria	Rhodobacterales	Rhodobacteraceae	Tropicimonas	Unclassified	0	0	0	1	2	1	0	0	0	0	0	1	0	0	0	0	0	0	0	0	0	0	1	0
OTU_5166	Bacteria	Proteobacteria	Alphaproteobacteria	Sphingomonadales	Erythrobacteraceae	Unclassified	Unclassified	0	0	0	0	1	0	0	0	0	0	0	0	0	0	0	0	0	0	0	0	0	0	0	0
OTU_5167	Bacteria	Proteobacteria	Alphaproteobacteria	Rhizobiales	Methylocystaceae	Hansschlegelia	uncultured bacterium	0	0	0	0	1	0	0	0	0	0	0	1	0	0	0	0	0	0	0	0	0	0	0	0
OTU_5169	Bacteria	Proteobacteria	Alphaproteobacteria	Rhodospirillales	Rhodospirillaceae	Unclassified	Unclassified	0	0	0	0	0	1	0	0	0	0	0	0	0	0	0	0	0	0	0	0	0	0	0	0
OTU_517	Bacteria	Proteobacteria	Alphaproteobacteria	Rhodospirillales	Rhodospirillaceae	Defluviicoccus	uncultured bacterium KM3-47-A6	0	42	20	0	0	0	0	0	2	0	0	0	0	15	7	0	0	0	0	0	0	0	0	0
OTU_5174	Bacteria	Proteobacteria	Alphaproteobacteria	Rickettsiales	Mitochondria	uncultured bacterium	uncultured bacterium	0	0	0	0	0	0	0	0	1	0	0	0	0	0	0	0	0	0	0	0	0	0	0	0
OTU_518	Bacteria	Proteobacteria	Alphaproteobacteria	Rhodospirillales	Rhodospirillaceae	Magnetospira	uncultured marine microorganism	0	26	0	0	0	0	0	0	0	0	0	0	0	9	0	0	0	0	0	0	0	0	0	0
OTU_5198	Bacteria	Proteobacteria	Alphaproteobacteria	Sphingomonadales	Erythrobacteraceae	Erythrobacter	uncultured Sphingomonadales bacterium	5	0	3	9	37	9	3	12	11	0	0	11	26	7	0	3	35	33	88	39	0	0	43	10
OTU_5204	Bacteria	Proteobacteria	Alphaproteobacteria	Rhizobiales	Phyllobacteriaceae	Unclassified	Unclassified	0	0	0	0	0	0	0	0	0	0	0	0	0	0	0	0	0	0	0	0	0	1	0	0
OTU_5208	Bacteria	Proteobacteria	Alphaproteobacteria	SAR11 clade	Surface 1	Unclassified	Unclassified	0	10	16	0	3	1	0	0	0	0	0	0	1	7	2	0	0	1	0	0	0	0	0	0
OTU_5209	Bacteria	Proteobacteria	Alphaproteobacteria	Rhodobacterales	Rhodobacteraceae	Thalassobius	uncultured bacterium	1	1	0	14	0	5	0	5	3	4	0	9	0	0	0	0	1	0	2	9	0	0	0	0
OTU_5213	Bacteria	Proteobacteria	Alphaproteobacteria	Rickettsiales	Unclassified	Unclassified	Unclassified	0	0	0	0	0	0	0	0	0	0	0	0	0	0	0	0	0	0	1	0	0	0	0	0
OTU_5214	Bacteria	Proteobacteria	Alphaproteobacteria	Rhodobacterales	Rhodobacteraceae	Unclassified	Unclassified	0	0	0	7	0	0	0	0	0	0	0	0	0	0	0	0	0	0	0	0	0	0	1	0
OTU_5217	Bacteria	Proteobacteria	Alphaproteobacteria	E6aD10	Stappia sp. JL1095	Stappia sp. JL1095	Stappia sp. JL1095	0	0	0	0	0	0	0	0	0	0	0	1	0	0	0	0	0	0	0	0	0	0	0	0
OTU_5220	Bacteria	Proteobacteria	Alphaproteobacteria	SAR11 clade	Deep 1	Unclassified	Unclassified	0	0	0	0	0	0	0	0	1	0	0	0	0	0	0	0	0	0	0	0	0	0	0	0
OTU_5222	Bacteria	Proteobacteria	Alphaproteobacteria	4-Org1-14	uncultured bacterium	uncultured bacterium	uncultured bacterium	0	0	0	0	1	0	0	0	0	0	0	0	0	0	0	0	1	0	0	0	0	0	0	0
OTU_5226	Bacteria	Proteobacteria	Alphaproteobacteria	Rhodobacterales	Rhodobacteraceae	Paracocccus	Unclassified	0	0	0	0	0	0	0	0	0	0	0	0	0	0	0	0	0	0	0	0	0	0	0	1
OTU_5227	Bacteria	Proteobacteria	Alphaproteobacteria	Rickettsiales	Mitochondria	Unclassified	Unclassified	0	0	0	0	0	0	0	0	0	0	0	0	0	0	0	0	0	0	0	0	0	0	0	1
OTU_5230	Bacteria	Proteobacteria	Alphaproteobacteria	Rickettsiales	Rickettsiales Incertae Sedis	Candidatus Lariskella	uncultured proteobacterium	0	0	0	0	0	0	0	0	0	0	0	0	0	0	0	0	0	0	0	0	0	0	0	1
OTU_5240	Bacteria	Proteobacteria	Alphaproteobacteria	Rhizobiales	Unclassified	Unclassified	Unclassified	0	0	0	0	0	0	0	0	1	0	0	0	0	0	0	0	0	0	0	0	0	0	0	0
OTU_5248	Bacteria	Proteobacteria	Alphaproteobacteria	Rickettsiales	Rickettsiaceae	Unclassified	Unclassified	0	0	0	0	0	0	0	0	0	0	0	0	0	0	0	0	0	0	0	1	0	0	0	0
OTU_5250	Bacteria	Proteobacteria	Alphaproteobacteria	Rhizobiales	Unclassified	Unclassified	Unclassified	0	0	0	0	0	0	0	0	0	0	0	0	0	0	1	0	0	0	0	0	0	0	0	0
OTU_5253	Bacteria	Proteobacteria	Alphaproteobacteria	Rhizobiales	Unclassified	Unclassified	Unclassified	0	0	0	0	0	0	0	0	0	0	0	0	0	0	0	1	0	0	0	0	0	0	0	0
OTU_5257	Bacteria	Proteobacteria	Alphaproteobacteria	Rhodobacterales	Rhodobacteraceae	Unclassified	Unclassified	0	0	0	0	0	0	0	0	0	0	0	0	0	0	0	0	1	0	0	0	0	0	0	0
OTU_526	Bacteria	Proteobacteria	Alphaproteobacteria	Rhodospirillales	Rhodospirillaceae	Defluviicoccus	uncultured organism	0	0	7	0	1	0	0	0	0	0	0	0	0	1	4	3	0	2	0	0	0	0	0	0
OTU_5263	Bacteria	Proteobacteria	Alphaproteobacteria	SAR11 clade	Unclassified	Unclassified	Unclassified	0	0	0	0	0	0	0	0	0	0	0	0	0	2	0	0	0	0	0	1	0	0	0	0
OTU_5267	Bacteria	Proteobacteria	Alphaproteobacteria	Rhodospirillales	Acetobacteraceae	Craurococcus	Unclassified	0	0	0	0	0	0	0	0	0	0	0	0	0	0	0	0	0	0	0	0	0	0	0	1
OTU_5269	Bacteria	Proteobacteria	Alphaproteobacteria	Rickettsiales	Mitochondria	Unclassified	Unclassified	0	0	0	0	0	0	0	0	0	0	0	0	0	0	0	0	0	0	0	0	0	0	0	1
OTU_5273	Bacteria	Proteobacteria	Alphaproteobacteria	Rhodobacterales	Rhodobacteraceae	Unclassified	Unclassified	0	0	0	4	0	0	0	0	0	0	0	0	0	0	0	0	0	0	0	0	0	0	0	0
OTU_5275	Bacteria	Proteobacteria	Alphaproteobacteria	SAR11 clade	Surface 1	unidentified marine bacterioplankton	unidentified marine bacterioplankton	1	0	0	0	0	0	0	0	0	0	0	0	0	0	0	0	0	0	0	0	0	0	0	0
OTU_5279	Bacteria	Proteobacteria	Alphaproteobacteria	Rickettsiales	Mitochondria	Unclassified	Unclassified	1	0	0	0	0	0	0	0	0	0	0	0	0	0	0	0	0	0	0	0	0	0	0	0
OTU_528	Bacteria	Proteobacteria	Alphaproteobacteria	Rickettsiales	Mitochondria	Unclassified	Unclassified	0	0	0	0	0	0	0	0	0	0	0	0	0	0	0	0	0	0	15	0	0	0	0	0
OTU_5281	Bacteria	Proteobacteria	Alphaproteobacteria	Sphingomonadales	Sphingomonadaceae	Sphingomonas	uncultured Sphingomonas sp.	1	0	0	0	2	0	0	0	0	4	3	0	0	0	0	0	0	0	1	0	3	1	3	1
OTU_5287	Bacteria	Proteobacteria	Alphaproteobacteria	Rhodospirillales	Unclassified	Unclassified	Unclassified	0	0	0	0	0	0	0	0	0	0	0	0	0	0	0	0	1	0	0	0	0	0	0	0
OTU_5295	Bacteria	Proteobacteria	Alphaproteobacteria	SAR11 clade	Deep 1	Unclassified	Unclassified	0	1	0	0	0	0	0	0	0	0	0	0	0	0	0	0	0	0	0	0	0	0	0	0
OTU_530	Bacteria	Proteobacteria	Alphaproteobacteria	SAR11 clade	Deep 1	marine metagenome	marine metagenome	0	17	1	0	0	0	0	0	0	0	0	0	0	7	0	0	0	0	0	0	0	0	0	0
OTU_5303	Bacteria	Proteobacteria	Alphaproteobacteria	Rhodobacterales	Rhodobacteraceae	Oceanicola	uncultured bacterium	0	0	0	0	1	2	0	0	0	0	0	0	0	0	0	0	1	4	0	0	0	0	0	0
OTU_5305	Bacteria	Proteobacteria	Alphaproteobacteria	SAR11 clade	uncultured Kordiimonas sp.	uncultured Kordiimonas sp.	uncultured Kordiimonas sp.	0	0	0	0	0	0	0	0	0	0	0	0	0	0	0	0	0	1	0	0	0	0	0	0
OTU_531	Bacteria	Proteobacteria	Alphaproteobacteria	Rhizobiales	Rhodobiaceae	Methyloligella	Methyloligella solikamskensis	0	6	0	0	0	0	1	0	0	0	0	0	5	0	0	0	0	0	2	0	0	0	0	0
OTU_5313	Bacteria	Proteobacteria	Alphaproteobacteria	SAR11 clade	Deep 1	Unclassified	Unclassified	0	0	0	0	0	0	0	0	0	0	0	0	0	0	0	0	0	0	0	1	0	0	0	0
OTU_5315	Bacteria	Proteobacteria	Alphaproteobacteria	SAR11 clade	Surface 1	Unclassified	Unclassified	0	1	0	0	0	0	0	0	0	0	0	0	0	1	0	0	0	0	0	0	0	0	0	0
OTU_5320	Bacteria	Proteobacteria	Alphaproteobacteria	Rhizobiales	Unclassified	Unclassified	Unclassified	0	0	0	0	0	0	0	0	0	0	0	0	0	0	0	0	0	0	0	0	0	0	1	0
OTU_5322	Bacteria	Proteobacteria	Alphaproteobacteria	Sphingomonadales	Erythrobacteraceae	Erythrobacter	uncultured Sphingomonadales bacterium	0	0	0	0	1	1	0	0	0	0	0	1	0	0	0	0	0	0	1	0	0	0	1	1
OTU_5328	Bacteria	Proteobacteria	Alphaproteobacteria	Unclassified	Unclassified	Unclassified	Unclassified	0	0	0	0	0	0	0	0	0	0	0	0	0	0	0	0	0	0	1	0	0	0	0	0
OTU_5332	Bacteria	Proteobacteria	Alphaproteobacteria	Rhizobiales	Phyllobacteriaceae	Hoeflea	uncultured Hoeflea sp.	0	0	0	0	8	1	0	0	0	0	1	0	0	0	0	0	3	0	2	0	0	882	1	0
OTU_5337	Bacteria	Proteobacteria	Alphaproteobacteria	Rickettsiales	Mitochondria	uncultured bacterium	uncultured bacterium	0	0	0	0	0	0	0	0	1	0	0	0	0	0	0	0	0	0	0	0	0	0	0	0
OTU_5338	Bacteria	Proteobacteria	Alphaproteobacteria	Rhodobacterales	Rhodobacteraceae	Unclassified	Unclassified	0	0	0	0	0	0	0	0	1	0	1	0	0	0	0	0	0	0	0	0	0	0	0	0
OTU_5339	Bacteria	Proteobacteria	Alphaproteobacteria	Rhodospirillales	Rhodospirillaceae	Tistlia	Tistlia consotensis USBA 355	0	0	0	0	0	0	0	0	1	0	0	0	0	0	0	0	0	0	0	0	0	0	0	0
OTU_5346	Bacteria	Proteobacteria	Alphaproteobacteria	SAR11 clade	Deep 1	Unclassified	Unclassified	0	9	10	0	0	1	0	0	1	1	0	0	2	10	5	2	0	1	0	2	2	0	0	0
OTU_5349	Bacteria	Proteobacteria	Alphaproteobacteria	Rickettsiales	Unclassified	Unclassified	Unclassified	0	0	0	0	0	0	0	0	1	0	0	0	0	0	0	0	0	0	0	0	0	0	0	0
OTU_5350	Bacteria	Proteobacteria	Alphaproteobacteria	Rickettsiales	Rickettsiaceae	uncultured	uncultured bacterium	0	1	0	0	1	0	0	0	0	0	0	0	0	0	0	0	0	0	0	0	0	0	0	0
OTU_5351	Bacteria	Proteobacteria	Alphaproteobacteria	Caulobacterales	Hyphomonadaceae	Unclassified	Unclassified	0	0	0	0	2	0	0	0	0	0	0	0	0	0	0	0	0	0	0	0	0	0	0	0
OTU_5354	Bacteria	Proteobacteria	Alphaproteobacteria	Rickettsiales	Rickettsiaceae	Candidatus Cryptoprodotis	uncultured bacterium	0	0	0	0	0	0	0	2	0	0	0	0	0	0	0	0	0	0	0	0	0	0	0	0
OTU_5356	Bacteria	Proteobacteria	Alphaproteobacteria	Rhodobacterales	Rhodobacteraceae	Unclassified	Unclassified	0	0	0	0	0	0	0	0	0	0	0	1	0	0	0	0	0	0	0	0	0	0	0	0
OTU_5357	Bacteria	Proteobacteria	Alphaproteobacteria	Rhizobiales	Hyphomicrobiaceae	uncultured	uncultured Hyphomicrobium sp.	0	0	0	0	0	0	0	0	0	0	0	1	0	0	0	0	0	0	0	0	0	0	0	0
OTU_5366	Bacteria	Proteobacteria	Alphaproteobacteria	Rhodospirillales	Rhodospirillaceae	uncultured	uncultured bacterium	2	0	0	0	0	0	0	0	0	0	0	0	0	0	0	0	0	0	0	0	0	0	0	0
OTU_5367	Bacteria	Proteobacteria	Alphaproteobacteria	Rickettsiales	Holosporaceae	uncultured	uncultured bacterium	0	0	0	0	0	0	0	0	0	0	0	0	1	0	0	0	0	0	0	0	0	0	0	0
OTU_537	Bacteria	Proteobacteria	Alphaproteobacteria	Rhodospirillales	Rhodospirillaceae	uncultured	uncultured deep-sea bacterium	0	17	1	0	0	0	0	0	0	0	0	0	0	7	16	0	0	0	0	0	0	0	0	0
OTU_5371	Bacteria	Proteobacteria	Alphaproteobacteria	Caulobacterales	Caulobacteraceae	Phenylobacterium	uncultured alpha proteobacterium	0	0	0	0	0	0	0	0	0	0	0	0	0	0	0	0	1	0	0	0	0	0	0	0
OTU_5372	Bacteria	Proteobacteria	Alphaproteobacteria	Rhodospirillales	Rhodospirillaceae	uncultured	uncultured alpha proteobacterium	0	0	0	0	0	0	0	0	0	0	0	0	0	0	0	0	1	1	0	0	0	0	0	0
OTU_5387	Bacteria	Proteobacteria	Alphaproteobacteria	Rickettsiales	Mitochondria	uncultured bacterium	uncultured bacterium	0	0	0	0	0	0	0	0	0	0	0	0	0	0	0	0	0	0	0	3	0	0	0	0
OTU_5391	Bacteria	Proteobacteria	Alphaproteobacteria	Rhizobiales	Unclassified	Unclassified	Unclassified	0	1	1	0	0	5	0	1	5	1	2	2	0	3	1	5	3	0	10	11	11	0	8	18
OTU_5393	Bacteria	Proteobacteria	Alphaproteobacteria	Rhodospirillales	Rhodospirillaceae	Unclassified	Unclassified	0	0	0	0	0	0	0	0	0	0	0	0	0	0	0	0	0	0	0	0	0	0	1	1
OTU_5395	Bacteria	Proteobacteria	Alphaproteobacteria	Rickettsiales	Rickettsiaceae	uncultured	uncultured bacterium	0	3	0	0	0	0	0	0	0	0	0	0	0	0	0	0	0	0	0	0	0	0	0	0
OTU_5397	Bacteria	Proteobacteria	Alphaproteobacteria	SAR11 clade	Deep 1	uncultured marine microorganism	uncultured marine microorganism	0	1	0	0	0	0	0	0	0	0	0	0	0	0	0	0	0	0	0	0	0	0	0	0
OTU_5417	Bacteria	Proteobacteria	Alphaproteobacteria	Rickettsiales	Unclassified	Unclassified	Unclassified	0	0	0	0	0	0	0	0	0	0	0	0	0	0	0	0	0	0	1	0	0	0	0	0
OTU_5419	Bacteria	Proteobacteria	Alphaproteobacteria	Rhodospirillales	Acetobacteraceae	Craurococcus	uncultured bacterium	0	0	0	0	0	0	0	0	0	0	0	0	0	0	0	0	0	0	0	0	1	0	0	0
OTU_5421	Bacteria	Proteobacteria	Alphaproteobacteria	Rhodobacterales	Rhodobacteraceae	Unclassified	Unclassified	0	0	0	0	0	0	0	0	0	0	0	0	0	0	0	0	0	0	0	0	0	1	0	0
OTU_5424	Bacteria	Proteobacteria	Alphaproteobacteria	Sphingomonadales	Sphingomonadaceae	Novosphingobium	uncultured organism	0	0	0	0	0	0	0	0	0	0	0	0	0	0	0	0	0	0	0	0	1	0	0	0
OTU_5425	Bacteria	Proteobacteria	Alphaproteobacteria	Rhodospirillales	Rhodospirillaceae	Unclassified	Unclassified	0	0	0	0	0	0	0	0	0	1	0	0	0	0	0	0	0	0	0	5	0	0	0	0
OTU_5427	Bacteria	Proteobacteria	Alphaproteobacteria	Caulobacterales	Hyphomonadaceae	Unclassified	Unclassified	0	0	0	0	0	0	0	0	0	0	0	0	0	0	0	0	1	0	0	0	0	0	0	0
OTU_5431	Bacteria	Proteobacteria	Alphaproteobacteria	Rhizobiales	Phyllobacteriaceae	Unclassified	Unclassified	0	0	0	0	0	0	0	0	0	0	0	0	0	0	0	0	0	0	0	0	0	1	0	0
OTU_5432	Bacteria	Proteobacteria	Alphaproteobacteria	Rhizobiales	Phyllobacteriaceae	Unclassified	Unclassified	0	0	0	0	0	0	0	0	0	0	0	0	0	0	0	0	0	0	0	0	0	2	0	0
OTU_5434	Bacteria	Proteobacteria	Alphaproteobacteria	Rhizobiales	Methylobacteriaceae	Methylobacterium	Unclassified	0	0	0	0	0	0	0	0	0	0	0	0	0	0	0	0	0	1	0	0	0	0	1	1
OTU_5439	Bacteria	Proteobacteria	Alphaproteobacteria	Sphingomonadales	Erythrobacteraceae	Erythrobacter	Unclassified	5	0	1	1	5	3	0	0	0	0	0	2	0	1	0	1	0	1	3	0	0	0	0	0
OTU_5457	Bacteria	Proteobacteria	Alphaproteobacteria	Sphingomonadales	Erythrobacteraceae	Erythrobacter	Unclassified	0	0	0	0	1	0	0	0	0	0	0	0	0	0	0	0	0	0	0	0	0	0	0	0
OTU_546	Bacteria	Proteobacteria	Alphaproteobacteria	Rhizobiales	Methylobacteriaceae	Methylobacterium	Unclassified	3	0	0	2	1	3	0	5	9	2	7	11	0	0	1	3	1	0	18	4	22	0	5	12
OTU_5464	Bacteria	Proteobacteria	Alphaproteobacteria	Sphingomonadales	Erythrobacteraceae	Unclassified	Unclassified	0	0	0	0	0	0	0	0	0	0	0	1	0	0	0	0	0	0	0	0	0	0	0	0
OTU_5465	Bacteria	Proteobacteria	Alphaproteobacteria	Unclassified	Unclassified	Unclassified	Unclassified	0	0	0	0	0	0	0	0	1	0	0	0	0	0	0	0	0	0	0	0	0	0	0	0
OTU_5468	Bacteria	Proteobacteria	Alphaproteobacteria	Rhizobiales	Phyllobacteriaceae	Hoeflea	Hoeflea halophila	0	0	0	0	0	0	0	0	0	0	0	0	0	0	0	0	0	0	0	0	0	3	0	0
OTU_5481	Bacteria	Proteobacteria	Alphaproteobacteria	Rhodospirillales	Rhodospirillaceae	uncultured	Unclassified	0	2	0	0	0	0	0	0	1	0	0	0	0	0	3	0	0	1	0	0	0	0	0	0
OTU_5484	Bacteria	Proteobacteria	Alphaproteobacteria	Sphingomonadales	Sphingomonadaceae	Sphingomonas	Unclassified	0	0	0	0	0	0	0	0	1	0	0	0	0	0	0	0	0	0	0	0	0	0	0	0
OTU_5485	Bacteria	Proteobacteria	Alphaproteobacteria	SAR11 clade	Deep 1	marine metagenome	marine metagenome	0	0	0	0	0	0	0	0	0	0	0	0	0	0	0	0	1	0	0	0	0	0	0	0
OTU_5489	Bacteria	Proteobacteria	Alphaproteobacteria	Rhizobiales	Rhodobiaceae	Rhodobium	uncultured bacterium	0	0	0	0	0	0	0	0	0	0	0	0	0	0	0	0	0	0	1	0	0	0	0	0
OTU_5495	Bacteria	Proteobacteria	Alphaproteobacteria	Rickettsiales	Mitochondria	Unclassified	Unclassified	0	0	0	0	0	0	0	0	0	0	0	0	0	0	0	0	0	0	0	0	1	0	0	0
OTU_5499	Bacteria	Proteobacteria	Alphaproteobacteria	Rhizobiales	Phyllobacteriaceae	Unclassified	Unclassified	0	0	0	0	0	0	0	0	0	0	0	0	0	0	0	0	0	0	0	0	0	1	0	0
OTU_5501	Bacteria	Proteobacteria	Alphaproteobacteria	Rickettsiales	Mitochondria	Unclassified	Unclassified	1	0	0	0	0	0	0	0	0	0	0	0	0	0	0	0	0	0	0	0	0	0	0	0
OTU_5502	Bacteria	Proteobacteria	Alphaproteobacteria	Rhizobiales	Hyphomicrobiaceae	Devosia	uncultured bacterium	1	1	0	0	0	1	1	0	0	0	0	0	0	2	0	0	0	0	0	0	0	0	0	0
OTU_5506	Bacteria	Proteobacteria	Alphaproteobacteria	Sphingomonadales	Erythrobacteraceae	Unclassified	Unclassified	0	0	0	0	1	0	0	0	0	0	0	0	0	0	0	0	0	0	0	0	0	0	0	0
OTU_551	Bacteria	Proteobacteria	Alphaproteobacteria	Rhodospirillales	Rhodospirillaceae	uncultured	uncultured deep-sea bacterium	0	0	1	0	0	0	0	0	0	0	0	0	0	0	2	0	0	0	0	0	0	0	0	14
OTU_5511	Bacteria	Proteobacteria	Alphaproteobacteria	SAR11 clade	Deep 1	Unclassified	Unclassified	0	0	0	0	1	0	0	0	0	0	0	0	0	0	0	0	0	0	0	0	0	0	0	0
OTU_5513	Bacteria	Proteobacteria	Alphaproteobacteria	Rickettsiales	Mitochondria	Unclassified	Unclassified	0	0	0	0	0	1	0	0	0	0	0	0	0	0	0	0	0	0	0	0	0	0	0	0
OTU_5533	Bacteria	Proteobacteria	Alphaproteobacteria	Rickettsiales	Rickettsiaceae	Candidatus Cryptoprodotis	uncultured bacterium	0	0	0	0	0	0	0	0	0	0	0	0	0	0	0	0	0	0	1	0	0	0	0	0
OTU_5538	Bacteria	Proteobacteria	Alphaproteobacteria	SAR11 clade	Surface 1	Candidatus Pelagibacter	Unclassified	0	0	0	0	0	0	0	0	0	0	0	0	0	1	0	0	0	0	0	0	0	0	0	0
OTU_5540	Bacteria	Proteobacteria	Alphaproteobacteria	Rhodobacterales	Rhodobacteraceae	Unclassified	Unclassified	0	0	0	0	0	0	0	0	0	0	0	0	0	0	0	2	0	0	0	0	0	0	0	0
OTU_5550	Bacteria	Proteobacteria	Alphaproteobacteria	Sphingomonadales	Erythrobacteraceae	Unclassified	Unclassified	0	0	0	0	0	1	0	0	0	0	0	0	0	1	0	0	0	0	0	0	0	0	0	0
OTU_5551	Bacteria	Proteobacteria	Alphaproteobacteria	Rhizobiales	Bradyrhizobiaceae	Bradyrhizobium	Bradyrhizobium elkanii	1	0	0	0	1	3	0	0	1	1	1	1	0	0	0	0	0	0	0	0	0	0	0	0
OTU_5552	Bacteria	Proteobacteria	Alphaproteobacteria	SAR11 clade	Surface 1	Unclassified	Unclassified	0	1	0	0	0	0	4	0	0	0	0	0	0	0	0	0	0	0	0	0	0	0	0	0
OTU_5553	Bacteria	Proteobacteria	Alphaproteobacteria	Rhodobacterales	Rhodobacteraceae	Unclassified	Unclassified	0	0	0	0	0	0	0	0	0	0	0	0	0	0	0	0	1	0	0	0	0	0	0	0
OTU_5554	Bacteria	Proteobacteria	Alphaproteobacteria	Rhodospirillales	Rhodospirillaceae	Thalassobaculum	uncultured alpha proteobacterium	0	0	0	0	0	0	0	0	0	0	0	0	0	0	0	0	1	0	0	0	0	0	0	0
OTU_5556	Bacteria	Proteobacteria	Alphaproteobacteria	Caulobacterales	Caulobacteraceae	uncultured	uncultured endolithic bacterium	0	0	0	0	0	0	0	0	0	0	0	0	0	0	0	0	0	0	1	0	0	0	0	0
OTU_556	Bacteria	Proteobacteria	Alphaproteobacteria	Rhodospirillales	Rhodospirillaceae	uncultured	marine metagenome	2	6	3	1	0	1	0	0	10	0	0	0	1	2	3	0	0	0	2	1	0	0	0	0
OTU_5562	Bacteria	Proteobacteria	Alphaproteobacteria	Sphingomonadales	Sphingomonadaceae	Unclassified	Unclassified	0	0	0	0	0	0	0	0	0	0	0	0	0	0	0	0	0	0	0	0	0	0	0	1
OTU_5565	Bacteria	Proteobacteria	Alphaproteobacteria	Rhodobacterales	Rhodobacteraceae	Unclassified	Unclassified	0	0	0	0	0	0	0	0	0	0	0	0	0	0	0	0	0	0	0	0	0	0	0	1
OTU_5568	Bacteria	Proteobacteria	Alphaproteobacteria	SAR11 clade	Unclassified	Unclassified	Unclassified	8	2	3	2	0	0	1	0	0	0	0	0	3	3	0	1	0	0	4	1	0	0	0	0
OTU_5583	Bacteria	Proteobacteria	Alphaproteobacteria	Unclassified	Unclassified	Unclassified	Unclassified	2	0	0	0	0	0	0	1	0	0	0	0	1	0	0	0	0	0	0	0	0	0	0	2
OTU_5588	Bacteria	Proteobacteria	Alphaproteobacteria	SAR11 clade	Deep 1	uncultured bacterium	uncultured bacterium	1	33	19	0	3	3	0	0	9	0	0	1	1	16	11	0	1	0	0	1	3	0	0	0
OTU_5593	Bacteria	Proteobacteria	Alphaproteobacteria	Rhodobacterales	Rhodobacteraceae	Unclassified	Unclassified	2	0	2	22	19	4	0	0	8	3	3	2	1	4	1	3	207	2	17	19	1	59	89	5
OTU_5604	Bacteria	Proteobacteria	Alphaproteobacteria	Rhodobacterales	Rhodobacteraceae	Unclassified	Unclassified	0	0	0	0	0	0	0	0	0	0	0	0	1	0	0	0	0	0	0	0	0	0	0	0
OTU_5605	Bacteria	Proteobacteria	Alphaproteobacteria	SAR11 clade	Deep 1	Unclassified	Unclassified	0	0	0	0	0	0	0	0	1	0	0	0	0	0	0	0	0	0	0	0	0	0	0	0
OTU_5608	Bacteria	Proteobacteria	Alphaproteobacteria	Rhodobacterales	Rhodobacteraceae	uncultured	unidentified	0	0	0	0	0	0	0	0	1	1	0	0	0	0	0	0	0	0	0	0	0	0	0	0
OTU_5610	Bacteria	Proteobacteria	Alphaproteobacteria	Unclassified	Unclassified	Unclassified	Unclassified	0	0	0	0	1	0	0	0	0	0	0	0	0	0	0	0	0	0	0	0	0	0	0	0
OTU_5611	Bacteria	Proteobacteria	Alphaproteobacteria	Rhodobacterales	Rhodobacteraceae	Unclassified	Unclassified	0	0	0	3	4	1	0	0	0	0	0	0	0	0	0	0	12	0	0	1	0	3	6	0
OTU_5613	Bacteria	Proteobacteria	Alphaproteobacteria	Rhodobacterales	Rhodobacteraceae	Pelagibaca	Pelagibaca bermudensis	0	0	0	0	0	0	0	0	0	0	0	0	0	0	0	0	0	0	0	0	0	0	0	4
OTU_5614	Bacteria	Proteobacteria	Alphaproteobacteria	Rhodobacterales	Rhodobacteraceae	Unclassified	Unclassified	0	0	0	0	0	0	0	0	0	0	0	0	0	0	0	0	0	0	0	0	0	1	0	0
OTU_5633	Bacteria	Proteobacteria	Alphaproteobacteria	Sphingomonadales	Unclassified	Unclassified	Unclassified	0	0	0	0	0	1	0	0	0	0	0	0	0	0	0	0	0	0	0	0	0	0	0	0
OTU_5634	Bacteria	Proteobacteria	Alphaproteobacteria	Rhodobacterales	Rhodobacteraceae	Unclassified	Unclassified	0	0	0	0	0	0	0	0	0	0	0	0	0	0	0	0	0	1	0	0	0	0	0	5
OTU_5635	Bacteria	Proteobacteria	Alphaproteobacteria	Rhodobacterales	Rhodobacteraceae	Unclassified	Unclassified	0	0	0	0	1	0	0	0	0	0	0	0	0	0	0	0	0	0	0	0	0	0	0	1
OTU_5636	Bacteria	Proteobacteria	Alphaproteobacteria	SAR11 clade	Deep 1	Unclassified	Unclassified	0	0	0	0	0	0	0	0	0	0	0	0	0	0	0	0	0	0	0	0	0	0	0	1
OTU_5642	Bacteria	Proteobacteria	Alphaproteobacteria	Unclassified	Unclassified	Unclassified	Unclassified	0	0	0	0	0	0	0	0	0	0	1	0	0	0	0	0	0	0	0	0	0	0	0	0
OTU_5644	Bacteria	Proteobacteria	Alphaproteobacteria	Rhodobacterales	Rhodobacteraceae	uncultured	Rhodobacter sp. R18	0	0	0	0	0	0	0	0	0	0	0	0	0	0	0	0	1	0	0	0	0	0	0	0
OTU_5648	Bacteria	Proteobacteria	Alphaproteobacteria	SAR11 clade	Deep 1	Unclassified	Unclassified	0	0	0	0	0	0	0	0	0	0	0	0	0	0	1	0	0	0	0	0	0	0	0	0
OTU_565	Bacteria	Proteobacteria	Alphaproteobacteria	SAR11 clade	uncultured marine microorganism	uncultured marine microorganism	uncultured marine microorganism	13	29	0	0	0	1	0	2	3	0	0	0	6	21	0	0	0	3	11	7	0	0	0	0
OTU_5658	Bacteria	Proteobacteria	Alphaproteobacteria	SAR11 clade	Unclassified	Unclassified	Unclassified	3	8	1	0	0	0	0	0	1	0	0	0	3	5	0	0	0	0	1	0	0	0	0	0
OTU_5660	Bacteria	Proteobacteria	Alphaproteobacteria	Rhodobacterales	Rhodobacteraceae	Unclassified	Unclassified	0	0	0	0	0	0	0	0	0	0	0	0	0	0	0	0	0	0	1	0	0	0	0	0
OTU_5674	Bacteria	Proteobacteria	Alphaproteobacteria	Rickettsiales	Mitochondria	Unclassified	Unclassified	0	0	0	0	0	0	0	0	0	0	0	0	0	0	0	0	0	0	0	1	0	0	0	0
OTU_5678	Bacteria	Proteobacteria	Alphaproteobacteria	SAR11 clade	Surface 1	Unclassified	Unclassified	0	1	0	0	1	1	0	0	0	0	0	0	0	3	1	0	0	0	0	0	0	0	0	0
OTU_5679	Bacteria	Proteobacteria	Alphaproteobacteria	Rickettsiales	Mitochondria	Unclassified	Unclassified	0	0	0	0	0	0	0	0	0	0	0	0	0	0	2	0	0	0	0	0	0	0	0	0
OTU_5685	Bacteria	Proteobacteria	Alphaproteobacteria	Rhodobacterales	Rhodobacteraceae	Unclassified	Unclassified	0	0	0	3	4	3	0	0	0	0	0	0	0	0	0	1	0	0	0	0	0	0	0	1
OTU_5694	Bacteria	Proteobacteria	Alphaproteobacteria	Unclassified	Unclassified	Unclassified	Unclassified	0	0	0	0	0	0	0	0	0	0	0	0	0	0	0	0	0	1	0	0	0	0	0	0
OTU_5704	Bacteria	Proteobacteria	Alphaproteobacteria	SAR11 clade	Unclassified	Unclassified	Unclassified	0	0	1	0	0	0	0	0	0	0	0	0	0	0	0	0	0	0	0	0	0	0	0	0
OTU_5705	Bacteria	Proteobacteria	Alphaproteobacteria	Rickettsiales	Rickettsiaceae	uncultured	Unclassified	1	0	0	0	0	0	0	0	0	0	0	0	0	0	0	0	0	0	0	0	0	0	0	0
OTU_5707	Bacteria	Proteobacteria	Alphaproteobacteria	Rhodospirillales	Rhodospirillaceae	Defluviicoccus	uncultured bacterium KM3-47-A6	0	1	0	0	0	0	0	0	0	0	0	0	0	0	0	0	0	0	0	0	0	0	0	0
OTU_571	Bacteria	Proteobacteria	Alphaproteobacteria	Rhodospirillales	Acetobacteraceae	Acidisoma	uncultured alpha proteobacterium	0	0	0	0	0	0	0	0	1	7	0	0	0	0	0	0	0	0	0	0	0	0	0	8
OTU_5710	Bacteria	Proteobacteria	Alphaproteobacteria	Rickettsiales	Mitochondria	uncultured bacterium	uncultured bacterium	1	0	0	0	0	0	0	0	0	0	0	0	0	0	0	0	0	0	0	0	0	0	0	0
OTU_5713	Bacteria	Proteobacteria	Alphaproteobacteria	OCS116 clade	Unclassified	Unclassified	Unclassified	1	0	0	0	0	0	0	0	0	0	0	0	0	0	0	0	0	0	0	0	0	0	0	0
OTU_5715	Bacteria	Proteobacteria	Alphaproteobacteria	SAR11 clade	Surface 1	Unclassified	Unclassified	0	1	0	0	0	0	0	0	0	0	0	0	0	0	0	0	0	0	0	0	0	0	0	0
OTU_5719	Bacteria	Proteobacteria	Alphaproteobacteria	Rhizobiales	Methylobacteriaceae	Methylobacterium	Unclassified	0	0	0	0	0	0	0	0	1	0	1	0	0	0	0	1	0	1	1	0	1	0	0	0
OTU_5720	Bacteria	Proteobacteria	Alphaproteobacteria	Sneathiellales	Sneathiellaceae	uncultured	uncultured marine microorganism	0	0	0	0	0	0	0	0	0	0	0	0	0	1	0	0	0	0	0	0	0	0	0	0
OTU_5722	Bacteria	Proteobacteria	Alphaproteobacteria	Sphingomonadales	Erythrobacteraceae	Altererythrobacter	uncultured organism	29	9	8	491	145	71	8	18	46	58	13	119	2	4	3	38	54	59	7	79	2	35	13	26
OTU_5724	Bacteria	Proteobacteria	Alphaproteobacteria	Sphingomonadales	Erythrobacteraceae	Erythrobacter	Unclassified	0	0	0	0	0	0	0	0	0	0	0	1	0	0	0	0	0	0	0	0	0	0	0	0
OTU_5733	Bacteria	Proteobacteria	Alphaproteobacteria	Caulobacterales	Hyphomonadaceae	Hyphomonas	Unclassified	0	0	0	0	0	0	0	0	1	0	0	0	0	0	0	0	0	0	0	0	0	1	0	1
OTU_5734	Bacteria	Proteobacteria	Alphaproteobacteria	Rickettsiales	Mitochondria	uncultured bacterium	uncultured bacterium	0	0	0	0	0	0	0	0	0	0	0	0	0	1	0	0	0	0	0	0	0	0	0	0
OTU_5737	Bacteria	Proteobacteria	Alphaproteobacteria	Rhizobiales	Methylobacteriaceae	Methylobacterium	Unclassified	0	0	0	0	0	0	0	0	0	1	0	0	0	0	0	0	0	0	0	0	1	0	0	1
OTU_5739	Bacteria	Proteobacteria	Alphaproteobacteria	Rickettsiales	Rickettsiaceae	uncultured	uncultured organism	0	0	0	0	0	0	0	0	1	0	0	0	0	0	0	0	0	0	0	0	0	0	0	0
OTU_574	Bacteria	Proteobacteria	Alphaproteobacteria	Rhodospirillales	Rhodospirillaceae	Defluviicoccus	uncultured bacterium	0	22	4	0	0	3	0	1	1	0	0	0	0	7	7	1	4	1	0	0	0	0	0	0
OTU_5740	Bacteria	Proteobacteria	Alphaproteobacteria	Rhodobacterales	Rhodobacteraceae	Unclassified	Unclassified	0	0	1	1	0	0	0	0	1	3	0	0	0	0	0	0	0	0	0	0	0	0	0	0
OTU_5748	Bacteria	Proteobacteria	Alphaproteobacteria	Rickettsiales	Unclassified	Unclassified	Unclassified	0	0	0	0	0	0	0	0	0	0	0	0	0	0	0	0	0	0	0	0	0	0	0	1
OTU_5751	Bacteria	Proteobacteria	Alphaproteobacteria	Rickettsiales	Mitochondria	uncultured bacterium	uncultured bacterium	0	0	0	0	0	0	0	0	0	0	0	0	1	0	0	0	0	0	0	0	0	0	0	1
OTU_5752	Bacteria	Proteobacteria	Alphaproteobacteria	Sphingomonadales	Sphingomonadaceae	Novosphingobium	Unclassified	0	0	0	0	0	0	0	0	0	0	0	0	0	0	0	0	0	0	0	0	0	0	1	0
OTU_5754	Bacteria	Proteobacteria	Alphaproteobacteria	SAR11 clade	Deep 1	Unclassified	Unclassified	0	0	0	0	0	0	0	0	0	0	0	0	0	0	1	0	0	0	0	0	0	0	0	0
OTU_5766	Bacteria	Proteobacteria	Alphaproteobacteria	Rhodospirillales	AT-s3-44	uncultured alpha proteobacterium	uncultured alpha proteobacterium	0	0	0	0	0	1	0	0	0	0	0	0	0	0	1	0	2	0	0	0	0	0	1	0
OTU_5767	Bacteria	Proteobacteria	Alphaproteobacteria	Rhodobacterales	Rhodobacteraceae	Unclassified	Unclassified	0	0	0	0	0	5	0	0	0	0	0	0	0	0	0	0	0	0	1	0	0	0	0	0
OTU_5769	Bacteria	Proteobacteria	Alphaproteobacteria	Rickettsiales	Mitochondria	Unclassified	Unclassified	0	0	0	0	0	0	0	0	0	0	0	0	0	0	0	0	0	0	1	0	0	0	0	0
OTU_5772	Bacteria	Proteobacteria	Alphaproteobacteria	Rhizobiales	Unclassified	Unclassified	Unclassified	0	0	0	0	0	0	0	1	0	0	0	0	0	0	0	0	0	0	2	1	0	0	0	0
OTU_5778	Bacteria	Proteobacteria	Alphaproteobacteria	Rhodobacterales	Rhodobacteraceae	Unclassified	Unclassified	0	0	0	0	1	0	0	0	0	0	0	0	0	0	0	0	0	0	0	0	0	0	0	0
OTU_5787	Bacteria	Proteobacteria	Alphaproteobacteria	Caulobacterales	Hyphomonadaceae	Maricaulis	alpha proteobacterium GMD21C01	1	0	0	0	0	0	0	0	0	0	0	0	0	0	0	0	0	0	0	0	0	0	0	0
OTU_5794	Bacteria	Proteobacteria	Alphaproteobacteria	Rhizobiales	Bradyrhizobiaceae	Bradyrhizobium	Unclassified	0	0	0	0	0	1	0	0	0	0	0	0	0	0	0	0	0	0	0	0	0	0	0	0
OTU_5795	Bacteria	Proteobacteria	Alphaproteobacteria	Rhodobacterales	Rhodobacteraceae	Unclassified	Unclassified	1	0	0	5	1	1	0	0	2	0	1	1	0	0	0	0	11	0	5	0	0	6	6	0
OTU_5798	Bacteria	Proteobacteria	Alphaproteobacteria	Rickettsiales	S25-593	uncultured Rickettsiales bacterium	uncultured Rickettsiales bacterium	0	2	1	0	0	14	0	0	1	0	0	0	0	0	0	1	0	2	0	0	0	0	0	0
OTU_58	Bacteria	Proteobacteria	Alphaproteobacteria	Rhodobacterales	Rhodobacteraceae	Unclassified	Unclassified	0	11	0	0	24	0	4	32	1	0	11	0	3	0	0	1	0	0	79	0	0	0	0	3
OTU_581	Bacteria	Proteobacteria	Alphaproteobacteria	Sphingomonadales	Sphingomonadaceae	Sphingomonas	Unclassified	0	0	0	1	1	2	0	0	4	0	0	0	0	0	0	0	0	0	0	1	2	0	0	0
OTU_5811	Bacteria	Proteobacteria	Alphaproteobacteria	DB1-14	unidentified marine bacterioplankton	unidentified marine bacterioplankton	unidentified marine bacterioplankton	0	0	0	0	0	1	0	0	0	0	0	0	0	1	0	0	0	0	0	0	0	0	0	0
OTU_5816	Bacteria	Proteobacteria	Alphaproteobacteria	Rickettsiales	Rickettsiales Incertae Sedis	Candidatus Lariskella	uncultured Rickettsiales bacterium	0	0	0	0	0	0	0	1	0	0	0	0	0	0	0	0	0	0	0	0	0	0	0	0
OTU_5822	Bacteria	Proteobacteria	Alphaproteobacteria	Rickettsiales	Mitochondria	Unclassified	Unclassified	0	1	0	0	0	0	0	0	0	0	0	0	0	0	0	0	0	0	0	0	0	0	0	0
OTU_5823	Bacteria	Proteobacteria	Alphaproteobacteria	SAR11 clade	Deep 1	uncultured alpha proteobacterium	uncultured alpha proteobacterium	1	37	18	1	13	7	0	0	4	1	2	0	0	22	23	4	1	7	0	4	5	0	1	2
OTU_5824	Bacteria	Proteobacteria	Alphaproteobacteria	Rhizobiales	Phyllobacteriaceae	Unclassified	Unclassified	0	0	0	0	0	0	0	0	0	0	0	1	0	0	0	0	0	0	0	0	0	0	0	0
OTU_5838	Bacteria	Proteobacteria	Alphaproteobacteria	Rhodobacterales	Rhodobacteraceae	Roseovarius	Unclassified	0	0	0	0	0	0	0	0	0	0	0	0	0	0	0	0	0	0	0	0	0	1	0	0
OTU_584	Bacteria	Proteobacteria	Alphaproteobacteria	Rhodobacterales	Rhodobacteraceae	Gemmobacter	Gemmobacter changlensis	0	0	0	0	0	0	0	0	0	0	0	0	0	0	0	0	0	0	0	0	8	0	0	0
OTU_5841	Bacteria	Proteobacteria	Alphaproteobacteria	Rhizobiales	Phyllobacteriaceae	Unclassified	Unclassified	0	0	0	0	0	0	0	0	0	0	0	0	0	0	0	0	0	0	0	0	0	1	0	0
OTU_5844	Bacteria	Proteobacteria	Alphaproteobacteria	Rhodobacterales	Rhodobacteraceae	Unclassified	Unclassified	0	0	1	0	0	0	0	0	0	0	0	0	0	0	0	0	0	0	0	0	0	0	0	0
OTU_5847	Bacteria	Proteobacteria	Alphaproteobacteria	Rhodospirillales	Rhodospirillaceae	uncultured	Unclassified	0	1	0	0	0	0	0	0	0	0	0	0	0	0	0	0	0	0	0	0	0	0	0	0
OTU_5853	Bacteria	Proteobacteria	Alphaproteobacteria	Rhodospirillales	Rhodospirillaceae	uncultured	Unclassified	0	1	0	0	0	0	0	0	0	0	0	0	0	0	0	0	0	0	0	0	0	0	0	0
OTU_5854	Bacteria	Proteobacteria	Alphaproteobacteria	Rhizobiales	Methylobacteriaceae	Methylobacterium	Unclassified	0	0	0	0	0	0	0	1	0	0	1	0	0	0	0	0	0	0	0	0	0	0	0	0
OTU_5863	Bacteria	Proteobacteria	Alphaproteobacteria	Rhizobiales	Rhodobiaceae	uncultured	Unclassified	0	0	0	0	0	0	0	0	0	0	0	0	0	0	0	0	0	1	0	0	0	0	0	3
OTU_5866	Bacteria	Proteobacteria	Alphaproteobacteria	OCS116 clade	uncultured alpha proteobacterium	uncultured alpha proteobacterium	uncultured alpha proteobacterium	0	0	0	0	0	0	0	0	0	0	0	1	0	0	0	0	0	0	0	0	0	0	0	0
OTU_5875	Bacteria	Proteobacteria	Alphaproteobacteria	Rickettsiales	Mitochondria	Unclassified	Unclassified	0	0	0	0	0	0	0	0	0	0	0	0	0	0	0	0	0	0	0	1	0	0	0	0
OTU_5878	Bacteria	Proteobacteria	Alphaproteobacteria	Unclassified	Unclassified	Unclassified	Unclassified	0	0	0	0	0	0	0	0	0	0	0	0	0	1	0	0	0	0	0	0	0	0	0	0
OTU_5884	Bacteria	Proteobacteria	Alphaproteobacteria	Rhodospirillales	Rhodospirillaceae	Thalassobaculum	Thalassobaculum salexigens DSM 19539	0	0	0	0	0	0	0	0	0	0	0	0	0	0	0	0	0	2	0	0	0	0	0	0
OTU_5887	Bacteria	Proteobacteria	Alphaproteobacteria	Caulobacterales	Hyphomonadaceae	uncultured	uncultured bacterium	0	0	0	0	0	0	0	0	0	0	0	0	0	0	0	1	0	0	0	0	0	0	0	0
OTU_5904	Bacteria	Proteobacteria	Alphaproteobacteria	Unclassified	Unclassified	Unclassified	Unclassified	0	0	0	0	0	0	0	0	0	0	0	0	0	0	0	0	0	0	0	0	1	0	0	0
OTU_591	Bacteria	Proteobacteria	Alphaproteobacteria	Rhodospirillales	Rhodospirillaceae	uncultured	uncultured alpha proteobacterium	1	0	0	0	0	0	0	0	1	0	0	0	0	0	0	0	0	0	1	0	0	0	0	14
OTU_5911	Bacteria	Proteobacteria	Alphaproteobacteria	SAR11 clade	Surface 1	Unclassified	Unclassified	3	4	5	0	2	1	0	0	0	0	0	0	0	15	2	0	1	0	0	1	0	0	0	0
OTU_5919	Bacteria	Proteobacteria	Alphaproteobacteria	Rhodospirillales	Rhodospirillaceae	uncultured	uncultured deep-sea bacterium	0	1	0	0	0	0	0	0	0	0	0	0	0	0	0	0	0	0	0	0	0	0	0	0
OTU_5930	Bacteria	Proteobacteria	Alphaproteobacteria	Rickettsiales	Unclassified	Unclassified	Unclassified	0	0	0	0	0	0	0	0	0	0	0	0	0	0	5	0	0	0	0	0	0	0	0	0
OTU_5931	Bacteria	Proteobacteria	Alphaproteobacteria	Rickettsiales	Rickettsiaceae	uncultured	uncultured bacterium	0	0	0	0	0	0	0	0	0	0	0	0	0	0	1	0	0	0	0	0	0	0	0	0
OTU_5937	Bacteria	Proteobacteria	Alphaproteobacteria	Sphingomonadales	Erythrobacteraceae	Erythrobacter	Unclassified	2	0	0	1	3	1	1	0	1	0	0	1	0	0	0	0	0	1	1	0	1	1	0	1
OTU_5938	Bacteria	Proteobacteria	Alphaproteobacteria	Rickettsiales	Mitochondria	uncultured bacterium	uncultured bacterium	0	0	0	0	0	0	0	1	0	0	0	0	0	0	0	0	0	0	0	0	0	0	0	0
OTU_5942	Bacteria	Proteobacteria	Alphaproteobacteria	Rhodobacterales	Rhodobacteraceae	Unclassified	Unclassified	0	0	0	0	1	0	0	0	0	0	0	0	0	0	0	0	0	0	0	0	0	0	1	0
OTU_5944	Bacteria	Proteobacteria	Alphaproteobacteria	Rhodobacterales	Rhodobacteraceae	Unclassified	Unclassified	0	0	0	0	0	1	0	0	0	0	0	0	0	0	0	0	0	0	0	0	0	0	0	0
OTU_595	Bacteria	Proteobacteria	Alphaproteobacteria	SAR11 clade	Deep 1	uncultured alpha proteobacterium	uncultured alpha proteobacterium	0	32	30	4	24	12	0	0	27	0	3	1	0	13	44	7	3	14	0	1	9	0	15	13
OTU_5951	Bacteria	Proteobacteria	Alphaproteobacteria	Rhizobiales	Phyllobacteriaceae	Pseudahrensia	Unclassified	0	0	0	0	0	0	0	0	0	0	0	0	0	0	0	0	0	0	0	0	0	1	0	0
OTU_5953	Bacteria	Proteobacteria	Alphaproteobacteria	Rhizobiales	Phyllobacteriaceae	Unclassified	Unclassified	0	0	0	0	0	0	0	0	0	0	0	0	0	1	0	0	0	0	0	0	0	0	0	0
OTU_5956	Bacteria	Proteobacteria	Alphaproteobacteria	Rhizobiales	Phyllobacteriaceae	Unclassified	Unclassified	0	0	0	0	0	0	0	0	0	0	0	1	0	0	0	0	0	0	0	0	0	0	0	0
OTU_5966	Bacteria	Proteobacteria	Alphaproteobacteria	Rhodobacterales	Rhodobacteraceae	Rubellimicrobium	uncultured bacterium	0	0	0	0	0	0	0	0	0	0	0	0	0	0	0	0	0	0	0	0	0	0	1	0
OTU_5969	Bacteria	Proteobacteria	Alphaproteobacteria	Rhodobacterales	Rhodobacteraceae	Unclassified	Unclassified	0	0	0	0	2	0	0	0	1	0	0	0	0	0	0	1	14	0	0	2	0	4	4	0
OTU_5970	Bacteria	Proteobacteria	Alphaproteobacteria	Unclassified	Unclassified	Unclassified	Unclassified	0	1	0	0	0	0	0	0	0	0	0	0	0	0	0	0	0	0	0	0	0	0	0	0
OTU_5979	Bacteria	Proteobacteria	Alphaproteobacteria	Rhodobacterales	Rhodobacteraceae	Unclassified	Unclassified	0	0	0	0	1	0	0	0	0	0	0	0	0	0	0	0	0	0	0	0	0	0	0	0
OTU_598	Bacteria	Proteobacteria	Alphaproteobacteria	Rhizobiales	Brucellaceae	Pseudochrobactrum	uncultured Brucellaceae bacterium	0	0	0	0	0	0	0	0	2	1	0	0	0	0	0	0	0	0	0	0	0	1	0	6
OTU_5980	Bacteria	Proteobacteria	Alphaproteobacteria	Rhodobacterales	Rhodobacteraceae	Paracocccus	Unclassified	0	0	0	0	1	0	0	0	0	0	1	0	0	0	0	0	0	0	0	0	0	0	0	0
OTU_5981	Bacteria	Proteobacteria	Alphaproteobacteria	DB1-14	uncultured bacterium	uncultured bacterium	uncultured bacterium	0	0	0	0	0	1	0	0	0	0	0	0	0	0	0	0	0	0	0	0	0	0	0	0
OTU_5992	Bacteria	Proteobacteria	Alphaproteobacteria	Rhizobiales	Phyllobacteriaceae	Hoeflea	Unclassified	0	0	0	0	0	0	0	0	0	0	0	0	0	0	0	0	0	0	0	0	0	2	0	0
OTU_5993	Bacteria	Proteobacteria	Alphaproteobacteria	Rhizobiales	Phyllobacteriaceae	Pseudahrensia	Unclassified	0	0	0	0	0	0	0	0	0	0	0	0	0	0	0	0	0	0	0	0	0	2	0	0
OTU_5998	Bacteria	Proteobacteria	Alphaproteobacteria	Rhodobacterales	Rhodobacteraceae	uncultured	Rhodobacter sp. R18	0	0	0	0	0	0	0	0	0	0	0	0	0	0	0	0	1	0	0	0	0	0	1	0
OTU_6	Bacteria	Proteobacteria	Alphaproteobacteria	Sphingomonadales	Erythrobacteraceae	Altererythrobacter	uncultured organism	15	3	24	99	244	544	10	41	39	16	45	3638	18	9	34	152	88	304	51	12	80	558	42	245
OTU_6000	Bacteria	Proteobacteria	Alphaproteobacteria	Sphingomonadales	Sphingomonadaceae	Unclassified	Unclassified	0	0	0	0	0	0	0	1	0	0	0	0	0	0	0	0	0	0	0	0	0	0	0	1
OTU_6008	Bacteria	Proteobacteria	Alphaproteobacteria	SAR11 clade	Surface 1	Unclassified	Unclassified	0	0	1	0	0	0	0	0	0	0	0	0	0	6	1	0	0	0	0	0	0	0	0	0
OTU_6010	Bacteria	Proteobacteria	Alphaproteobacteria	Rhodospirillales	Rhodospirillaceae	uncultured	Unclassified	0	1	0	0	0	0	0	0	0	0	0	0	0	0	0	0	0	0	0	0	0	0	0	0
OTU_6024	Bacteria	Proteobacteria	Alphaproteobacteria	Sphingomonadales	Unclassified	Unclassified	Unclassified	0	0	0	0	1	0	0	0	0	0	0	1	0	0	0	0	0	0	0	0	0	0	0	0
OTU_6025	Bacteria	Proteobacteria	Alphaproteobacteria	Sphingomonadales	Erythrobacteraceae	Erythrobacter	Unclassified	0	0	0	1	0	0	0	0	0	0	0	0	0	0	0	0	0	0	0	0	0	0	0	0
OTU_6028	Bacteria	Proteobacteria	Alphaproteobacteria	Rhodospirillales	Rhodospirillaceae	AEGEAN-169 marine group	unidentified marine bacterioplankton	0	1	0	0	0	0	0	0	0	0	0	0	0	0	0	0	0	0	0	0	0	0	0	0
OTU_6032	Bacteria	Proteobacteria	Alphaproteobacteria	Sphingomonadales	Erythrobacteraceae	Unclassified	Unclassified	0	0	0	3	1	2	0	0	0	0	0	0	0	0	0	1	0	0	0	0	0	0	0	0
OTU_6033	Bacteria	Proteobacteria	Alphaproteobacteria	Rhizobiales	Xanthobacteraceae	Variibacter	uncultured bacterium	0	0	0	0	0	0	0	0	0	0	0	0	0	0	0	0	0	0	0	0	0	0	0	1
OTU_6038	Bacteria	Proteobacteria	Alphaproteobacteria	Rickettsiales	Holosporaceae	uncultured	uncultured bacterium	0	0	0	0	0	0	0	0	0	0	0	0	0	0	1	0	0	0	0	0	0	0	0	0
OTU_6044	Bacteria	Proteobacteria	Alphaproteobacteria	Rhodobacterales	Rhodobacteraceae	Unclassified	Unclassified	0	0	0	0	0	0	0	0	0	0	0	0	0	0	0	0	0	0	0	0	0	0	1	0
OTU_605	Bacteria	Proteobacteria	Alphaproteobacteria	DB1-14	uncultured organism	uncultured organism	uncultured organism	0	0	0	0	12	5	0	0	0	0	0	0	0	0	1	2	6	7	0	0	1	0	0	0
OTU_6053	Bacteria	Proteobacteria	Alphaproteobacteria	Unclassified	Unclassified	Unclassified	Unclassified	0	0	0	0	0	0	0	0	0	0	0	0	0	0	0	0	0	0	0	0	0	0	1	0
OTU_6054	Bacteria	Proteobacteria	Alphaproteobacteria	Rickettsiales	Mitochondria	Unclassified	Unclassified	0	0	0	0	0	0	0	0	0	0	0	0	0	0	0	0	0	0	0	0	0	0	1	0
OTU_6056	Bacteria	Proteobacteria	Alphaproteobacteria	Rhodobacterales	Rhodobacteraceae	Unclassified	Unclassified	0	0	0	0	0	0	0	0	0	0	0	0	0	0	0	0	0	0	0	0	0	0	0	1
OTU_6057	Bacteria	Proteobacteria	Alphaproteobacteria	Rhodobacterales	Rhodobacteraceae	Pelagibaca	Pelagibaca bermudensis	1	1	1	7	10	27	0	0	3	0	4	21	0	0	0	8	26	69	0	0	3	1	36	111
OTU_606	Bacteria	Proteobacteria	Alphaproteobacteria	SAR11 clade	Surface 1	Unclassified	Unclassified	0	11	0	0	0	1	0	0	0	0	0	0	0	3	0	0	0	0	0	3	0	0	0	0
OTU_6061	Bacteria	Proteobacteria	Alphaproteobacteria	Rhodobacterales	Rhodobacteraceae	Paracocccus	Unclassified	0	0	0	1	4	0	0	0	0	0	1	0	0	0	0	0	1	0	0	0	0	0	0	0
OTU_6062	Bacteria	Proteobacteria	Alphaproteobacteria	Rickettsiales	Mitochondria	Unclassified	Unclassified	0	0	0	0	0	0	0	0	0	0	0	0	0	0	0	0	0	0	1	0	0	0	0	0
OTU_6066	Bacteria	Proteobacteria	Alphaproteobacteria	Sphingomonadales	Sphingomonadaceae	Sphingomonas	Unclassified	0	0	0	0	1	0	0	0	0	0	0	1	0	0	0	0	0	1	1	2	4	0	1	0
OTU_6067	Bacteria	Proteobacteria	Alphaproteobacteria	SAR11 clade	Surface 1	Unclassified	Unclassified	0	0	0	0	0	0	0	0	0	0	0	0	0	2	0	0	0	0	1	0	0	0	0	0
OTU_6069	Bacteria	Proteobacteria	Alphaproteobacteria	Rhizobiales	Hyphomicrobiaceae	uncultured	uncultured bacterium	0	0	0	0	0	0	0	0	0	0	0	0	0	0	0	0	0	0	0	0	1	0	0	0
OTU_607	Bacteria	Proteobacteria	Alphaproteobacteria	Rhodobacterales	Rhodobacteraceae	Rhodobacter	uncultured Rhodobacter sp.	0	0	0	0	0	0	0	0	0	0	0	0	0	0	0	0	0	0	0	7	0	0	0	0
OTU_6070	Bacteria	Proteobacteria	Alphaproteobacteria	Rhodospirillales	Rhodospirillaceae	Defluviicoccus	unidentified marine bacterioplankton	0	0	0	0	0	0	0	0	0	0	0	0	0	0	0	0	0	0	0	2	0	0	0	0
OTU_6074	Bacteria	Proteobacteria	Alphaproteobacteria	SAR11 clade	Deep 1	Unclassified	Unclassified	0	1	2	0	0	1	0	0	1	1	0	0	0	0	2	0	0	0	0	0	1	0	0	1
OTU_6077	Bacteria	Proteobacteria	Alphaproteobacteria	Rhodobacterales	Rhodobacteraceae	Unclassified	Unclassified	0	0	0	0	0	0	0	0	0	0	0	0	0	0	0	0	0	0	0	0	0	0	0	1
OTU_608	Bacteria	Proteobacteria	Alphaproteobacteria	Rhodospirillales	Rhodospirillaceae	Defluviicoccus	Unclassified	0	7	0	0	0	0	0	0	0	0	0	0	0	2	0	0	0	0	0	4	0	0	0	0
OTU_6096	Bacteria	Proteobacteria	Alphaproteobacteria	Rhodospirillales	AT-s3-44	uncultured bacterium	uncultured bacterium	0	0	1	1	0	0	0	0	0	0	0	0	0	0	0	0	0	1	0	0	0	0	0	0
OTU_61	Bacteria	Proteobacteria	Alphaproteobacteria	Rhizobiales	Phyllobacteriaceae	Nitratireductor	uncultured Nitratireductor sp.	10	19	6	0	2	3	3	39	5	0	0	2	30	1	0	1	0	1	243	5	1	0	0	2
OTU_6102	Bacteria	Proteobacteria	Alphaproteobacteria	Rhodospirillales	Acetobacteraceae	Roseomonas	uncultured bacterium	0	0	0	0	0	0	0	0	0	0	0	0	0	0	0	0	0	0	0	0	1	0	0	0
OTU_6105	Bacteria	Proteobacteria	Alphaproteobacteria	Rhodobacterales	Rhodobacteraceae	Rhodobacter	uncultured alpha proteobacterium	0	0	0	0	0	0	0	0	0	0	0	0	0	0	0	0	0	0	0	0	0	0	6	0
OTU_6121	Bacteria	Proteobacteria	Alphaproteobacteria	Rhodospirillales	Rhodospirillaceae	uncultured	Unclassified	0	0	0	0	0	1	0	0	0	0	0	0	0	0	0	0	0	0	0	0	0	0	0	0
OTU_6124	Bacteria	Proteobacteria	Alphaproteobacteria	Rickettsiales	uncultured	uncultured Acanthamoeba	uncultured Acanthamoeba	0	0	0	0	0	1	0	0	0	0	0	0	0	0	0	0	0	0	0	0	0	0	0	0
OTU_614	Bacteria	Proteobacteria	Alphaproteobacteria	Rhodospirillales	Acetobacteraceae	Roseomonas	uncultured bacterium	0	0	0	0	0	0	0	0	0	0	1	5	0	0	0	0	0	0	0	1	0	0	0	0
OTU_6140	Bacteria	Proteobacteria	Alphaproteobacteria	Rhodospirillales	Rhodospirillaceae	Defluviicoccus	Unclassified	0	0	0	0	0	3	0	0	0	0	0	0	0	1	0	0	0	0	0	0	0	0	0	0
OTU_6145	Bacteria	Proteobacteria	Alphaproteobacteria	Sphingomonadales	Erythrobacteraceae	Unclassified	Unclassified	1	0	0	1	7	0	0	1	0	1	1	5	0	0	0	3	2	0	2	1	1	4	1	0
OTU_6148	Bacteria	Proteobacteria	Alphaproteobacteria	Rhodobacterales	Rhodobacteraceae	Unclassified	Unclassified	0	0	0	0	2	0	0	0	0	0	0	0	0	0	0	0	0	0	0	0	0	0	0	0
OTU_6154	Bacteria	Proteobacteria	Alphaproteobacteria	Rhizobiales	Hyphomicrobiaceae	Maritalea	Maritalea myrionectae DSM 19524	0	0	0	0	0	0	0	0	0	0	0	0	0	0	0	1	0	0	0	0	0	0	0	0
OTU_6157	Bacteria	Proteobacteria	Alphaproteobacteria	Caulobacterales	Hyphomonadaceae	Unclassified	Unclassified	0	0	1	1	1	2	0	0	0	0	0	1	0	1	0	0	4	0	0	0	0	1	1	0
OTU_6158	Bacteria	Proteobacteria	Alphaproteobacteria	Rickettsiales	Rickettsiaceae	uncultured	uncultured organism	0	0	0	0	0	0	0	0	2	0	0	0	0	0	0	0	0	0	1	0	0	0	0	0
OTU_6159	Bacteria	Proteobacteria	Alphaproteobacteria	SAR11 clade	Deep 1	Unclassified	Unclassified	0	13	7	0	0	2	0	0	0	0	0	0	0	9	4	0	1	0	0	0	0	0	1	1
OTU_6164	Bacteria	Proteobacteria	Alphaproteobacteria	Sphingomonadales	Erythrobacteraceae	Erythrobacter	Unclassified	0	0	0	1	2	2	0	2	0	0	0	6	0	0	0	0	1	0	7	1	0	0	0	0
OTU_6171	Bacteria	Proteobacteria	Alphaproteobacteria	SAR11 clade	Deep 1	uncultured alpha proteobacterium	uncultured alpha proteobacterium	0	3	0	0	0	0	0	0	1	0	0	0	0	2	1	0	0	0	0	0	0	0	0	0
OTU_6172	Bacteria	Proteobacteria	Alphaproteobacteria	Rhodospirillales	Rhodospirillaceae	uncultured	Unclassified	0	0	1	0	0	0	0	0	0	0	0	0	0	0	0	0	0	0	0	0	0	0	0	0
OTU_6176	Bacteria	Proteobacteria	Alphaproteobacteria	Rhodospirillales	Rhodospirillaceae	Unclassified	Unclassified	0	0	1	0	0	0	0	0	0	0	0	0	0	0	0	0	0	0	0	0	0	0	0	0
OTU_6182	Bacteria	Proteobacteria	Alphaproteobacteria	Rhizobiales	Phyllobacteriaceae	Unclassified	Unclassified	0	0	0	0	0	0	0	0	0	0	0	0	0	0	0	0	0	0	0	0	0	1	0	0
OTU_6196	Bacteria	Proteobacteria	Alphaproteobacteria	SAR11 clade	Surface 1	uncultured marine microorganism	uncultured marine microorganism	0	0	0	0	0	0	0	0	0	0	0	0	0	1	0	0	0	0	0	0	0	0	0	0
OTU_6204	Bacteria	Proteobacteria	Alphaproteobacteria	OCS116 clade	uncultured bacterium	uncultured bacterium	uncultured bacterium	0	0	0	0	0	0	0	0	0	0	0	1	0	0	0	0	0	0	0	0	0	0	0	0
OTU_6205	Bacteria	Proteobacteria	Alphaproteobacteria	Rickettsiales	S25-593	uncultured marine microorganism	uncultured marine microorganism	0	0	0	0	0	0	0	0	0	0	0	0	0	0	0	0	0	0	0	0	0	0	0	1
OTU_6208	Bacteria	Proteobacteria	Alphaproteobacteria	Rhizobiales	Phyllobacteriaceae	Unclassified	Unclassified	0	0	0	0	0	0	0	0	0	0	0	0	0	0	0	0	0	0	0	0	0	3	0	0
OTU_621	Bacteria	Proteobacteria	Alphaproteobacteria	Rickettsiales	Mitochondria	Unclassified	Unclassified	4	0	0	0	0	0	0	1	2	0	0	0	0	0	0	0	0	0	0	0	0	0	0	12
OTU_6215	Bacteria	Proteobacteria	Alphaproteobacteria	Rhizobiales	Unclassified	Unclassified	Unclassified	0	0	0	0	0	0	0	0	0	0	0	0	0	0	0	0	0	0	0	0	1	0	0	0
OTU_6216	Bacteria	Proteobacteria	Alphaproteobacteria	Sphingomonadales	Erythrobacteraceae	Erythrobacter	Unclassified	0	0	0	0	3	3	0	0	0	1	0	5	0	0	0	2	1	0	1	1	0	0	1	1
OTU_622	Bacteria	Proteobacteria	Alphaproteobacteria	Rickettsiales	SAR116 clade	unidentified marine bacterioplankton	unidentified marine bacterioplankton	7	0	0	0	0	1	0	0	9	0	0	0	3	0	0	0	0	2	0	1	0	0	0	0
OTU_6228	Bacteria	Proteobacteria	Alphaproteobacteria	Rickettsiales	SAR116 clade	uncultured Rhodospirillaceae bacterium	uncultured Rhodospirillaceae bacterium	0	0	0	0	1	1	0	0	0	0	0	0	0	0	0	0	0	4	0	0	0	0	0	0
OTU_623	Bacteria	Proteobacteria	Alphaproteobacteria	Rickettsiales	Mitochondria	uncultured bacterium	uncultured bacterium	3	0	0	0	0	0	0	0	0	0	0	0	0	0	0	0	0	0	7	0	0	0	0	1
OTU_6237	Bacteria	Proteobacteria	Alphaproteobacteria	Rhodospirillales	Rhodospirillaceae	AEGEAN-169 marine group	uncultured bacterium	1	0	0	0	0	0	0	0	0	0	0	0	0	0	0	0	0	0	0	0	0	0	0	0
OTU_6240	Bacteria	Proteobacteria	Alphaproteobacteria	Rhizobiales	Phyllobacteriaceae	Unclassified	Unclassified	0	0	0	0	0	0	0	0	0	0	0	0	0	0	0	0	0	0	0	0	0	4	0	0
OTU_6241	Bacteria	Proteobacteria	Alphaproteobacteria	Rhizobiales	Phyllobacteriaceae	Unclassified	Unclassified	0	0	0	0	0	0	0	0	0	0	0	0	0	0	0	0	0	0	0	0	0	2	0	0
OTU_625	Bacteria	Proteobacteria	Alphaproteobacteria	Rhizobiales	Phyllobacteriaceae	Pseudahrensia	uncultured marine bacterium	0	0	0	0	0	0	0	0	0	0	0	0	0	0	0	0	0	0	3	3	0	1	1	8
OTU_6255	Bacteria	Proteobacteria	Alphaproteobacteria	Rhizobiales	Methylobacteriaceae	Methylobacterium	Unclassified	0	0	0	0	0	0	0	0	0	2	0	0	0	0	0	0	0	0	0	0	5	0	0	0
OTU_6257	Bacteria	Proteobacteria	Alphaproteobacteria	Sphingomonadales	Erythrobacteraceae	Erythrobacter	Unclassified	1	1	0	5	8	15	0	2	0	0	0	4	1	0	0	4	3	3	6	1	0	3	4	0
OTU_6259	Bacteria	Proteobacteria	Alphaproteobacteria	Rhodospirillales	Rhodospirillaceae	Thalassospira	Unclassified	0	0	0	0	0	0	0	0	0	0	0	0	0	0	0	0	1	0	0	0	0	0	0	0
OTU_6267	Bacteria	Proteobacteria	Alphaproteobacteria	Sneathiellales	Sneathiellaceae	Sneathiella	uncultured bacterium	0	0	0	0	0	0	0	0	0	0	0	0	0	1	0	0	0	0	0	0	0	0	1	0
OTU_6273	Bacteria	Proteobacteria	Alphaproteobacteria	SAR11 clade	Deep 1	Unclassified	Unclassified	0	0	0	0	1	1	0	0	0	0	0	0	0	0	1	0	0	0	0	0	0	0	0	0
OTU_6281	Bacteria	Proteobacteria	Alphaproteobacteria	Rhodospirillales	Rhodospirillaceae	AEGEAN-169 marine group	Unclassified	0	3	0	0	0	0	0	0	0	0	0	0	0	1	0	0	0	0	0	1	0	0	0	0
OTU_629	Bacteria	Proteobacteria	Alphaproteobacteria	SAR11 clade	Chesapeake-Delaware Bay	uncultured marine bacterium	uncultured marine bacterium	8	0	2	0	0	0	1	0	0	0	0	0	0	0	0	0	0	0	1	0	0	0	0	0
OTU_6291	Bacteria	Proteobacteria	Alphaproteobacteria	Rhodobacterales	Rhodobacteraceae	Paracocccus	Unclassified	0	0	0	0	0	0	0	0	0	0	0	1	0	0	0	0	0	0	0	0	0	0	0	0
OTU_6296	Bacteria	Proteobacteria	Alphaproteobacteria	Rhodobacterales	Rhodobacteraceae	uncultured	Rhodobacter sp. R18	0	0	0	0	1	0	0	0	0	0	1	0	0	0	0	0	0	0	0	0	0	0	0	0
OTU_6298	Bacteria	Proteobacteria	Alphaproteobacteria	Unclassified	Unclassified	Unclassified	Unclassified	0	0	0	0	0	0	0	0	0	0	0	0	2	0	0	0	0	0	0	0	0	0	0	0
OTU_630	Bacteria	Proteobacteria	Alphaproteobacteria	Rhodospirillales	AT-s3-44	uncultured bacterium	uncultured bacterium	0	0	7	1	3	8	0	0	0	0	0	0	0	0	11	0	2	2	0	0	0	0	1	0
OTU_6309	Bacteria	Proteobacteria	Alphaproteobacteria	SAR11 clade	Deep 1	Unclassified	Unclassified	0	0	0	0	0	0	0	0	1	0	0	0	0	0	2	0	0	0	0	0	0	0	0	0
OTU_6315	Bacteria	Proteobacteria	Alphaproteobacteria	Rhodobacterales	Rhodobacteraceae	uncultured	Unclassified	0	0	0	0	0	0	0	0	1	0	0	0	0	0	0	0	0	0	0	0	0	0	0	0
OTU_6316	Bacteria	Proteobacteria	Alphaproteobacteria	Rhodobacterales	Rhodobacteraceae	Unclassified	Unclassified	0	0	0	0	0	0	0	0	1	0	0	0	0	0	0	0	0	0	0	0	0	0	0	0
OTU_6319	Bacteria	Proteobacteria	Alphaproteobacteria	Rickettsiales	Mitochondria	uncultured bacterium	uncultured bacterium	0	0	0	0	0	0	0	0	1	0	0	0	0	0	0	0	0	0	0	0	0	0	0	0
OTU_6320	Bacteria	Proteobacteria	Alphaproteobacteria	SAR11 clade	Surface 1	marine metagenome	marine metagenome	3	14	4	0	1	3	0	0	1	0	0	0	0	6	6	1	0	5	0	0	0	0	1	0
OTU_6323	Bacteria	Proteobacteria	Alphaproteobacteria	Rickettsiales	Mitochondria	Unclassified	Unclassified	0	0	1	0	0	0	0	0	0	0	0	0	0	0	0	0	0	0	0	0	0	0	0	0
OTU_6324	Bacteria	Proteobacteria	Alphaproteobacteria	Rhodobacterales	Rhodobacteraceae	Unclassified	Unclassified	0	0	0	0	0	0	0	0	0	0	0	0	0	0	0	0	1	0	0	0	0	0	0	0
OTU_6325	Bacteria	Proteobacteria	Alphaproteobacteria	Rickettsiales	SM2D12	uncultured bacterium	uncultured bacterium	0	0	0	0	0	0	0	0	0	0	0	0	0	0	0	0	1	0	0	0	0	0	0	0
OTU_6332	Bacteria	Proteobacteria	Alphaproteobacteria	Caulobacterales	Hyphomonadaceae	Hyphomonas	uncultured bacterium	0	0	4	0	39	11	0	1	1	0	3	1	0	0	0	1	8	1	1	6	1	3	1	7
OTU_6340	Bacteria	Proteobacteria	Alphaproteobacteria	Rhodobacterales	Rhodobacteraceae	Unclassified	Unclassified	0	0	0	0	1	1	0	0	0	0	0	0	0	0	0	1	0	0	0	0	0	0	1	0
OTU_6345	Bacteria	Proteobacteria	Alphaproteobacteria	Sphingomonadales	Erythrobacteraceae	Erythrobacter	uncultured Sphingomonadales bacterium	0	0	0	0	1	0	0	0	0	0	0	0	0	0	0	0	0	0	0	0	0	0	0	0
OTU_6352	Bacteria	Proteobacteria	Alphaproteobacteria	Sphingomonadales	Erythrobacteraceae	Erythrobacter	Erythrobacter sp. JL1029	0	0	1	0	0	0	0	0	0	0	0	1	0	0	0	0	0	0	0	0	0	0	0	0
OTU_6360	Bacteria	Proteobacteria	Alphaproteobacteria	Rhodospirillales	Unclassified	Unclassified	Unclassified	1	0	0	0	0	0	0	0	0	0	0	0	0	0	0	0	0	0	0	0	0	0	0	0
OTU_6362	Bacteria	Proteobacteria	Alphaproteobacteria	Rhodospirillales	Rhodospirillaceae	Unclassified	Unclassified	0	1	0	0	0	0	0	0	0	0	0	0	0	0	0	0	0	0	0	0	0	0	0	0
OTU_6373	Bacteria	Proteobacteria	Alphaproteobacteria	Rhodobacterales	Rhodobacteraceae	Unclassified	Unclassified	0	0	0	0	0	0	0	0	0	0	0	0	0	0	0	0	0	0	0	0	0	0	1	0
OTU_6379	Bacteria	Proteobacteria	Alphaproteobacteria	Sphingomonadales	Unclassified	Unclassified	Unclassified	0	0	0	0	0	1	0	0	0	0	0	0	0	0	0	0	0	0	0	0	0	0	0	0
OTU_6380	Bacteria	Proteobacteria	Alphaproteobacteria	SAR11 clade	Deep 1	Unclassified	Unclassified	0	0	0	1	0	1	0	0	0	0	0	0	0	0	0	0	0	0	0	0	0	0	0	0
OTU_6382	Bacteria	Proteobacteria	Alphaproteobacteria	SAR11 clade	Surface 1	uncultured marine microorganism	uncultured marine microorganism	0	0	0	0	0	0	0	0	1	0	0	0	0	0	0	0	0	0	0	0	0	0	0	0
OTU_6384	Bacteria	Proteobacteria	Alphaproteobacteria	Rickettsiales	Mitochondria	uncultured bacterium	uncultured bacterium	0	0	0	0	0	0	0	0	1	0	0	0	0	0	0	0	0	0	0	0	0	0	0	0
OTU_639	Bacteria	Proteobacteria	Alphaproteobacteria	Unclassified	Unclassified	Unclassified	Unclassified	0	0	0	10	0	0	0	0	0	0	0	0	0	0	0	0	0	19	0	0	0	0	0	0
OTU_6392	Bacteria	Proteobacteria	Alphaproteobacteria	Rhodobacterales	Rhodobacteraceae	Unclassified	Unclassified	0	0	0	0	0	0	0	0	0	0	0	0	0	0	0	1	0	0	0	0	0	0	0	0
OTU_6394	Bacteria	Proteobacteria	Alphaproteobacteria	Unclassified	Unclassified	Unclassified	Unclassified	0	0	0	1	0	1	0	1	0	0	0	0	0	0	0	1	9	1	0	0	0	0	0	1
OTU_6395	Bacteria	Proteobacteria	Alphaproteobacteria	SAR11 clade	Deep 1	Unclassified	Unclassified	0	0	0	0	0	0	0	0	0	0	0	0	0	0	0	0	0	1	0	0	0	0	0	0
OTU_641	Bacteria	Proteobacteria	Alphaproteobacteria	Rickettsiales	Unclassified	Unclassified	Unclassified	0	0	0	0	0	0	0	0	0	0	0	0	0	0	0	0	0	0	0	0	0	0	0	12
OTU_6413	Bacteria	Proteobacteria	Alphaproteobacteria	SAR11 clade	Surface 1	Unclassified	Unclassified	10	63	34	1	4	3	0	0	6	0	0	1	7	31	23	8	0	6	2	0	2	0	7	2
OTU_6414	Bacteria	Proteobacteria	Alphaproteobacteria	Rickettsiales	SM2D12	uncultured bacterium	uncultured bacterium	0	0	0	0	0	1	0	0	0	0	0	0	0	0	0	0	0	0	0	0	0	0	0	0
OTU_6417	Bacteria	Proteobacteria	Alphaproteobacteria	Rickettsiales	Mitochondria	Unclassified	Unclassified	0	0	0	0	0	1	0	0	0	0	0	0	0	0	0	0	0	0	0	0	0	0	0	0
OTU_6418	Bacteria	Proteobacteria	Alphaproteobacteria	Rhizobiales	Phyllobacteriaceae	Hoeflea	Unclassified	0	0	0	5	16	31	0	0	1	2	3	30	0	0	0	7	6	3	1	0	0	130	3	6
OTU_6419	Bacteria	Proteobacteria	Alphaproteobacteria	Rhodobacterales	Rhodobacteraceae	Unclassified	Unclassified	0	0	0	0	0	0	0	0	0	0	0	0	0	0	0	0	0	1	0	0	0	0	0	0
OTU_642	Bacteria	Proteobacteria	Alphaproteobacteria	Rhizobiales	Aurantimonadaceae	Martelella	Martelella sp. UBF-P8	0	0	0	0	8	0	0	0	0	0	2	0	0	0	0	1	0	0	0	0	0	0	0	0
OTU_6421	Bacteria	Proteobacteria	Alphaproteobacteria	Unclassified	Unclassified	Unclassified	Unclassified	0	0	0	0	0	0	0	0	0	0	0	0	0	0	0	0	0	1	0	0	0	0	0	0
OTU_6425	Bacteria	Proteobacteria	Alphaproteobacteria	Rhodospirillales	Rhodospirillaceae	uncultured	uncultured nuHF2 cluster bacterium HF0130_29D04	0	0	0	0	0	0	0	0	0	0	0	0	0	1	0	0	0	0	0	0	0	0	0	0
OTU_6430	Bacteria	Proteobacteria	Alphaproteobacteria	Sphingomonadales	Erythrobacteraceae	Erythrobacter	Unclassified	0	0	0	1	1	1	0	0	0	1	0	0	0	0	0	2	0	2	1	1	0	0	0	1
OTU_6432	Bacteria	Proteobacteria	Alphaproteobacteria	Rhodobacterales	Rhodobacteraceae	Unclassified	Unclassified	0	0	0	0	0	0	0	0	0	0	0	0	0	0	0	0	0	0	0	0	0	0	1	0
OTU_6435	Bacteria	Proteobacteria	Alphaproteobacteria	Rickettsiales	Mitochondria	uncultured bacterium	uncultured bacterium	0	0	0	0	0	0	0	0	0	0	0	0	0	0	0	0	0	0	0	0	0	0	0	1
OTU_6443	Bacteria	Proteobacteria	Alphaproteobacteria	Rhodobacterales	Rhodobacteraceae	Unclassified	Unclassified	0	1	0	0	3	1	0	0	0	0	0	0	0	0	0	0	11	0	1	0	0	2	4	0
OTU_6463	Bacteria	Proteobacteria	Alphaproteobacteria	SAR11 clade	Surface 1	marine metagenome	marine metagenome	12	28	20	0	1	4	4	0	2	0	0	0	1	48	9	0	1	5	0	0	1	0	6	8
OTU_6464	Bacteria	Proteobacteria	Alphaproteobacteria	DB1-14	Unclassified	Unclassified	Unclassified	0	0	0	0	0	1	0	0	0	0	0	0	0	0	0	0	0	0	0	0	0	0	0	0
OTU_6465	Bacteria	Proteobacteria	Alphaproteobacteria	Rhodospirillales	Rhodospirillaceae	Defluviicoccus	uncultured bacterium KM3-47-A6	0	0	1	0	0	2	0	0	0	0	0	0	0	0	1	0	0	0	0	0	0	0	0	0
OTU_6466	Bacteria	Proteobacteria	Alphaproteobacteria	Sphingomonadales	Erythrobacteraceae	Altererythrobacter	Unclassified	0	0	0	0	0	0	0	0	0	0	0	1	0	0	0	0	0	0	0	0	0	0	0	0
OTU_6468	Bacteria	Proteobacteria	Alphaproteobacteria	Rhizobiales	Phyllobacteriaceae	Unclassified	Unclassified	0	0	0	0	0	0	0	0	0	0	0	0	0	0	0	0	0	0	0	0	0	2	0	0
OTU_6473	Bacteria	Proteobacteria	Alphaproteobacteria	Rhizobiales	Aurantimonadaceae	Unclassified	Unclassified	0	0	0	0	0	0	0	0	0	0	0	1	0	0	0	0	0	0	0	0	0	0	0	0
OTU_6475	Bacteria	Proteobacteria	Alphaproteobacteria	SAR11 clade	Deep 1	uncultured marine bacterium	uncultured marine bacterium	0	0	1	0	0	0	0	0	1	0	0	0	0	0	1	0	0	0	0	0	0	0	0	0
OTU_6478	Bacteria	Proteobacteria	Alphaproteobacteria	Rickettsiales	Mitochondria	Phaeodactylum tricornutum	Phaeodactylum tricornutum	0	0	0	0	0	0	0	1	0	0	0	0	0	0	0	0	0	0	0	0	0	0	0	0
OTU_6482	Bacteria	Proteobacteria	Alphaproteobacteria	SAR11 clade	Deep 1	Unclassified	Unclassified	0	0	0	0	0	0	0	0	0	0	0	0	0	0	1	1	0	0	0	0	0	0	0	0
OTU_6495	Bacteria	Proteobacteria	Alphaproteobacteria	Rickettsiales	Mitochondria	uncultured bacterium	uncultured bacterium	0	0	0	0	0	0	0	1	0	0	0	0	0	0	0	0	0	0	0	0	0	0	0	0
OTU_65	Bacteria	Proteobacteria	Alphaproteobacteria	Rickettsiales	SM2D12	uncultured organism	uncultured organism	0	0	21	0	5	17	0	0	4	0	0	1	0	0	2	84	1	32	0	0	0	0	0	0
OTU_650	Bacteria	Proteobacteria	Alphaproteobacteria	Rhodospirillales	Rhodospirillaceae	AEGEAN-169 marine group	uncultured bacterium	0	14	1	0	0	0	0	0	0	0	0	0	0	0	0	0	0	0	0	0	0	0	0	0
OTU_6500	Bacteria	Proteobacteria	Alphaproteobacteria	SAR11 clade	Surface 1	uncultured marine microorganism	uncultured marine microorganism	0	7	6	1	1	1	0	0	0	0	0	0	0	0	4	1	1	1	0	0	2	0	0	1
OTU_6505	Bacteria	Proteobacteria	Alphaproteobacteria	Sphingomonadales	Sphingomonadaceae	Unclassified	Unclassified	0	0	0	0	0	0	0	0	0	0	0	1	0	0	0	0	0	0	0	0	0	0	0	0
OTU_6506	Bacteria	Proteobacteria	Alphaproteobacteria	Sphingomonadales	Unclassified	Unclassified	Unclassified	0	0	0	0	0	0	0	0	0	0	0	1	0	0	0	0	0	0	0	0	0	0	0	0
OTU_651	Bacteria	Proteobacteria	Alphaproteobacteria	Rickettsiales	Mitochondria	Unclassified	Unclassified	0	0	0	0	0	0	0	0	0	0	0	0	0	0	0	0	0	0	0	0	0	0	0	6
OTU_6514	Bacteria	Proteobacteria	Alphaproteobacteria	Sphingomonadales	Erythrobacteraceae	Erythrobacter	Unclassified	0	0	0	4	0	0	0	0	0	0	0	1	0	0	0	0	0	0	0	1	0	0	0	0
OTU_6516	Bacteria	Proteobacteria	Alphaproteobacteria	Sphingomonadales	Erythrobacteraceae	Erythrobacter	Unclassified	4	0	0	23	18	26	4	2	3	0	1	27	5	0	1	5	1	5	12	1	3	5	1	1
OTU_6531	Bacteria	Proteobacteria	Alphaproteobacteria	SAR11 clade	Unclassified	Unclassified	Unclassified	0	1	0	0	0	0	0	0	0	0	0	0	0	0	0	0	0	0	0	0	0	0	0	0
OTU_6535	Bacteria	Proteobacteria	Alphaproteobacteria	SAR11 clade	Surface 1	uncultured SAR11 cluster alpha proteobacterium H17925_48B19	uncultured SAR11 cluster alpha proteobacterium H17925_48B19	13	10	6	0	1	2	1	0	0	0	1	1	12	21	1	0	0	1	1	0	0	0	2	1
OTU_655	Bacteria	Proteobacteria	Alphaproteobacteria	Rhodobacterales	Rhodobacteraceae	Rubellimicrobium	uncultured bacterium	0	0	0	0	0	0	0	0	0	6	0	0	0	0	0	0	0	0	0	0	3	0	0	2
OTU_6551	Bacteria	Proteobacteria	Alphaproteobacteria	Rickettsiales	AKIW1012	uncultured alpha proteobacterium	uncultured alpha proteobacterium	0	0	0	0	0	0	0	0	0	0	0	0	0	0	0	0	0	0	0	1	0	0	0	0
OTU_6555	Bacteria	Proteobacteria	Alphaproteobacteria	Sphingomonadales	Sphingomonadaceae	uncultured	alpha proteobacterium JLT2012	0	0	0	0	1	0	1	0	0	0	0	0	0	0	0	0	0	0	0	0	0	0	0	0
OTU_6557	Bacteria	Proteobacteria	Alphaproteobacteria	Rhodobacterales	Rhodobacteraceae	Unclassified	Unclassified	0	0	0	2	0	0	0	0	0	0	0	0	0	0	0	0	0	0	0	0	0	0	0	0
OTU_656	Bacteria	Proteobacteria	Alphaproteobacteria	Caulobacterales	Caulobacteraceae	Brevundimonas	uncultured bacterium	0	0	0	0	3	1	0	0	0	1	0	1	0	0	0	0	2	0	3	2	4	0	0	0
OTU_6561	Bacteria	Proteobacteria	Alphaproteobacteria	Rhodobacterales	Rhodobacteraceae	Unclassified	Unclassified	0	0	0	0	0	1	0	0	0	0	0	0	0	0	0	0	0	1	0	0	0	0	0	0
OTU_6564	Bacteria	Proteobacteria	Alphaproteobacteria	Rhodobacterales	Rhodobacteraceae	Unclassified	Unclassified	0	0	0	0	1	0	0	0	0	0	0	0	0	0	0	0	0	0	0	0	0	0	1	1
OTU_657	Bacteria	Proteobacteria	Alphaproteobacteria	Rhodospirillales	Rhodospirillaceae	uncultured	uncultured deep-sea bacterium	0	5	11	0	0	5	0	1	0	0	0	0	0	1	40	0	0	0	0	0	0	0	0	0
OTU_6570	Bacteria	Proteobacteria	Alphaproteobacteria	Rhodobacterales	Rhodobacteraceae	Unclassified	Unclassified	0	0	0	1	0	0	0	0	0	0	0	0	0	0	0	0	0	0	0	0	0	0	0	0
OTU_6571	Bacteria	Proteobacteria	Alphaproteobacteria	Unclassified	Unclassified	Unclassified	Unclassified	0	0	1	0	0	0	0	0	0	0	0	0	0	0	0	0	0	0	0	0	0	0	0	0
OTU_6573	Bacteria	Proteobacteria	Alphaproteobacteria	Unclassified	Unclassified	Unclassified	Unclassified	0	0	0	0	0	0	0	0	0	0	0	0	0	0	0	0	0	0	0	1	0	0	0	0
OTU_6574	Bacteria	Proteobacteria	Alphaproteobacteria	Rickettsiales	Mitochondria	uncultured deep-sea bacterium	uncultured deep-sea bacterium	0	0	0	0	0	1	0	0	0	0	0	0	0	0	0	0	0	0	0	0	0	0	0	0
OTU_6578	Bacteria	Proteobacteria	Alphaproteobacteria	Rhodobacterales	Rhodobacteraceae	Ruegeria	Unclassified	2	0	0	23	0	8	0	1	1	10	0	1	0	0	0	0	1	0	1	0	0	0	1	0
OTU_6581	Bacteria	Proteobacteria	Alphaproteobacteria	SB1-18	uncultured alpha proteobacterium	uncultured alpha proteobacterium	uncultured alpha proteobacterium	0	0	0	0	0	1	0	0	0	0	0	0	0	0	0	0	0	0	0	0	0	0	0	0
OTU_6586	Bacteria	Proteobacteria	Alphaproteobacteria	Rickettsiales	Mitochondria	Unclassified	Unclassified	0	0	0	0	0	0	0	0	0	0	0	0	0	0	0	0	0	0	0	1	0	0	0	0
OTU_6587	Bacteria	Proteobacteria	Alphaproteobacteria	SAR11 clade	Deep 1	uncultured organism	uncultured organism	0	0	0	0	0	0	0	0	0	0	0	0	0	2	0	0	0	0	0	0	0	0	0	0
OTU_6591	Bacteria	Proteobacteria	Alphaproteobacteria	Sphingomonadales	Erythrobacteraceae	Unclassified	Unclassified	0	0	0	0	0	3	0	0	0	0	0	0	0	0	0	0	0	0	0	0	0	0	0	0
OTU_6593	Bacteria	Proteobacteria	Alphaproteobacteria	Rickettsiales	Rickettsiaceae	uncultured	uncultured bacterium	0	0	0	0	0	1	0	0	0	0	0	0	0	0	0	0	0	0	0	0	0	0	0	0
OTU_66	Bacteria	Proteobacteria	Alphaproteobacteria	Sphingomonadales	Erythrobacteraceae	Erythrobacter	Citromicrobium sp. JLT1363	3	5	4	67	112	36	2	9	13	4	9	39	20	0	31	42	52	73	43	13	106	43	0	7
OTU_6600	Bacteria	Proteobacteria	Alphaproteobacteria	Rickettsiales	Mitochondria	uncultured bacterium	uncultured bacterium	0	0	0	0	0	0	0	0	0	0	0	0	0	0	0	0	0	0	1	0	0	0	0	0
OTU_6602	Bacteria	Proteobacteria	Alphaproteobacteria	Sphingomonadales	Erythrobacteraceae	Unclassified	Unclassified	0	0	0	6	0	9	0	1	1	0	0	19	0	0	0	2	0	1	1	2	1	0	0	1
OTU_6603	Bacteria	Proteobacteria	Alphaproteobacteria	Sphingomonadales	Erythrobacteraceae	Unclassified	Unclassified	1	0	0	0	0	4	0	0	0	0	0	3	0	0	0	0	0	0	0	1	0	0	0	1
OTU_6604	Bacteria	Proteobacteria	Alphaproteobacteria	Rhizobiales	Methylobacteriaceae	Methylobacterium	Unclassified	0	0	0	0	0	0	0	0	1	0	0	1	0	0	0	0	0	0	2	2	1	0	0	4
OTU_6608	Bacteria	Proteobacteria	Alphaproteobacteria	Rhodobacterales	Rhodobacteraceae	uncultured	Roseobacter sp. P7	0	0	0	0	0	0	0	0	0	0	0	0	0	1	0	0	0	0	0	0	0	0	0	0
OTU_6615	Bacteria	Proteobacteria	Alphaproteobacteria	SAR11 clade	Deep 1	Unclassified	Unclassified	0	0	0	0	0	0	0	0	0	0	0	0	0	3	0	0	0	0	0	0	0	0	0	0
OTU_6619	Bacteria	Proteobacteria	Alphaproteobacteria	SAR11 clade	Deep 1	Unclassified	Unclassified	2	11	17	0	3	7	0	0	0	0	0	0	1	20	4	0	0	1	0	0	0	0	1	0
OTU_6628	Bacteria	Proteobacteria	Alphaproteobacteria	SAR11 clade	Surface 1	uncultured marine microorganism	uncultured marine microorganism	0	0	0	0	0	1	0	0	0	0	0	0	0	0	0	0	0	0	0	0	0	0	0	0
OTU_6629	Bacteria	Proteobacteria	Alphaproteobacteria	SAR11 clade	Deep 1	Unclassified	Unclassified	0	0	4	0	0	0	0	0	0	0	0	0	0	1	2	0	0	0	0	0	0	0	1	0
OTU_6630	Bacteria	Proteobacteria	Alphaproteobacteria	SAR11 clade	Surface 1	Unclassified	Unclassified	0	0	0	0	0	0	0	0	0	0	0	0	0	0	1	0	0	0	0	0	0	0	0	0
OTU_6635	Bacteria	Proteobacteria	Alphaproteobacteria	SB1-18	uncultured alpha proteobacterium	uncultured alpha proteobacterium	uncultured alpha proteobacterium	0	0	0	0	0	0	0	0	0	0	0	1	0	0	0	0	0	0	0	0	0	0	0	0
OTU_6645	Bacteria	Proteobacteria	Alphaproteobacteria	Rhodobacterales	Rhodobacteraceae	Roseovarius	Unclassified	0	0	0	0	0	0	0	0	0	0	0	0	0	0	0	0	0	0	0	0	0	1	0	0
OTU_6646	Bacteria	Proteobacteria	Alphaproteobacteria	Rhodobacterales	Rhodobacteraceae	uncultured	unidentified marine bacterioplankton	4	0	0	0	0	0	1	0	0	0	0	1	1	0	0	0	0	0	0	0	0	0	0	0
OTU_6647	Bacteria	Proteobacteria	Alphaproteobacteria	Rickettsiales	Mitochondria	uncultured bacterium	uncultured bacterium	0	0	0	0	0	0	0	0	0	0	0	0	0	0	0	0	0	0	0	0	0	0	0	1
OTU_6648	Bacteria	Proteobacteria	Alphaproteobacteria	Rickettsiales	Mitochondria	uncultured bacterium	uncultured bacterium	1	0	0	0	0	0	0	0	0	0	0	0	0	0	0	0	0	0	0	0	0	0	0	0
OTU_6652	Bacteria	Proteobacteria	Alphaproteobacteria	Rhodobacterales	Rhodobacteraceae	Unclassified	Unclassified	0	0	0	0	0	1	0	0	0	0	0	0	0	0	0	0	1	0	0	0	0	0	0	1
OTU_6657	Bacteria	Proteobacteria	Alphaproteobacteria	Rhodobacterales	Rhodobacteraceae	Unclassified	Unclassified	0	0	0	1	0	0	0	0	0	0	0	0	0	0	0	0	0	0	0	0	0	0	0	0
OTU_6660	Bacteria	Proteobacteria	Alphaproteobacteria	SAR11 clade	Deep 1	Unclassified	Unclassified	0	0	0	0	0	0	0	0	1	1	0	0	0	0	0	0	0	0	0	0	0	0	0	0
OTU_668	Bacteria	Proteobacteria	Alphaproteobacteria	SAR11 clade	Surface 1	uncultured marine microorganism	uncultured marine microorganism	0	5	2	1	2	1	0	2	2	0	0	0	0	6	10	0	0	0	0	7	2	0	0	0
OTU_669	Bacteria	Proteobacteria	Alphaproteobacteria	DB1-14	uncultured bacterium	uncultured bacterium	uncultured bacterium	0	0	0	0	0	0	0	0	0	0	0	0	0	0	2	0	0	2	0	0	0	1	0	3
OTU_684	Bacteria	Proteobacteria	Alphaproteobacteria	Rickettsiales	SAR116 clade	Candidatus Puniceispirillum	uncultured marine bacterium	7	0	0	2	0	3	0	0	0	0	0	0	3	5	0	0	0	0	2	1	0	0	0	13
OTU_688	Bacteria	Proteobacteria	Alphaproteobacteria	Rhodospirillales	Rhodospirillaceae	AEGEAN-169 marine group	Unclassified	0	2	1	0	1	5	0	0	0	0	0	0	0	0	1	2	0	0	0	1	0	0	0	0
OTU_7	Bacteria	Proteobacteria	Alphaproteobacteria	Rhodobacterales	Rhodobacteraceae	Oceanicola	uncultured bacterium	2	3	6	133	571	702	10	4	5	2	16	29	2	2	20	378	511	490	0	0	36	13	32	95
OTU_70	Bacteria	Proteobacteria	Alphaproteobacteria	OCS116 clade	uncultured bacterium	uncultured bacterium	uncultured bacterium	0	48	36	6	24	27	0	1	7	0	0	0	0	19	65	35	17	13	0	0	4	0	3	0
OTU_702	Bacteria	Proteobacteria	Alphaproteobacteria	Rickettsiales	Mitochondria	Unclassified	Unclassified	0	0	0	0	0	0	0	0	1	0	0	0	3	0	0	1	0	0	9	0	0	0	2	28
OTU_709	Bacteria	Proteobacteria	Alphaproteobacteria	Rhizobiales	Phyllobacteriaceae	Nitratireductor	Unclassified	1	0	1	0	1	1	0	1	0	0	0	2	0	0	0	1	0	9	0	2	9	0	0	0
OTU_710	Bacteria	Proteobacteria	Alphaproteobacteria	OCS116 clade	Unclassified	Unclassified	Unclassified	0	0	0	0	0	0	0	0	0	0	0	6	0	0	0	0	0	1	0	0	0	0	6	1
OTU_711	Bacteria	Proteobacteria	Alphaproteobacteria	Caulobacterales	Caulobacteraceae	uncultured	uncultured Rhizobiales bacterium	0	0	0	0	6	0	0	0	0	0	0	0	0	0	0	0	0	0	0	0	0	0	0	0
OTU_712	Bacteria	Proteobacteria	Alphaproteobacteria	OCS116 clade	uncultured bacterium	uncultured bacterium	uncultured bacterium	0	0	0	0	9	6	0	0	0	0	1	0	0	0	5	2	0	2	0	0	3	0	1	1
OTU_715	Bacteria	Proteobacteria	Alphaproteobacteria	Rhodospirillales	AT-s3-44	uncultured bacterium	uncultured bacterium	0	2	1	0	0	1	0	0	1	0	0	0	0	2	9	0	0	0	0	0	0	0	0	0
OTU_718	Bacteria	Proteobacteria	Alphaproteobacteria	Rhizobiales	Rhodobiaceae	uncultured	uncultured bacterium	0	0	0	3	2	0	0	0	0	0	0	0	0	0	0	0	2	0	0	0	0	0	0	0
OTU_72	Bacteria	Proteobacteria	Alphaproteobacteria	Rhizobiales	Unclassified	Unclassified	Unclassified	1	0	0	0	3	0	0	4	3	0	0	1	3	0	0	0	0	0	194	1	0	1	0	0
OTU_720	Bacteria	Proteobacteria	Alphaproteobacteria	SAR11 clade	Deep 1	uncultured marine microorganism	uncultured marine microorganism	0	0	6	0	1	0	0	0	1	0	0	0	0	0	2	0	0	0	0	1	0	0	0	0
OTU_730	Bacteria	Proteobacteria	Alphaproteobacteria	Rhodospirillales	Rhodospirillaceae	Defluviicoccus	uncultured Phyllobacteriaceae bacterium	0	0	4	1	4	3	0	0	0	0	0	0	0	0	7	0	3	7	0	0	0	0	0	0
OTU_733	Bacteria	Proteobacteria	Alphaproteobacteria	Rhizobiales	Xanthobacteraceae	Xanthobacter	Xanthobacter autotrophicus	0	0	0	0	0	0	0	0	0	0	0	0	0	0	0	0	1	0	0	0	0	0	6	0
OTU_735	Bacteria	Proteobacteria	Alphaproteobacteria	Rhodospirillales	Rhodospirillaceae	AEGEAN-169 marine group	uncultured bacterium	0	3	2	5	0	2	0	0	0	0	0	0	0	6	2	0	0	0	0	1	1	0	0	0
OTU_74	Bacteria	Proteobacteria	Alphaproteobacteria	SAR11 clade	Surface 1	uncultured marine microorganism	uncultured marine microorganism	0	151	297	32	138	222	0	1	127	2	4	4	0	76	357	58	53	119	0	25	48	0	37	38
OTU_742	Bacteria	Proteobacteria	Alphaproteobacteria	SAR11 clade	Deep 1	uncultured bacterium	uncultured bacterium	2	23	0	0	0	0	0	0	1	0	0	0	7	9	0	0	0	0	0	4	0	0	0	0
OTU_747	Bacteria	Proteobacteria	Alphaproteobacteria	Rhizobiales	Unclassified	Unclassified	Unclassified	1	1	0	0	0	0	0	1	0	0	0	0	1	0	0	1	0	0	13	0	0	0	0	0
OTU_75	Bacteria	Proteobacteria	Alphaproteobacteria	Caulobacterales	Caulobacteraceae	Phenylobacterium	uncultured alpha proteobacterium	0	0	0	0	0	0	0	0	0	0	0	0	0	0	0	0	136	0	0	0	0	0	7	0
OTU_752	Bacteria	Proteobacteria	Alphaproteobacteria	Rhodospirillales	Rhodospirillaceae	uncultured	uncultured alpha proteobacterium	0	2	0	0	0	0	0	5	0	0	0	0	1	2	0	0	0	0	0	0	0	0	0	0
OTU_753	Bacteria	Proteobacteria	Alphaproteobacteria	Rickettsiales	Mitochondria	Unclassified	Unclassified	0	6	0	0	0	0	0	1	1	0	0	0	0	0	0	0	0	0	0	0	1	0	0	0
OTU_755	Bacteria	Proteobacteria	Alphaproteobacteria	Rhodospirillales	Rhodospirillaceae	uncultured	uncultured alpha proteobacterium	0	0	6	0	0	0	0	0	0	0	0	0	0	0	1	0	0	0	0	0	0	0	0	0
OTU_756	Bacteria	Proteobacteria	Alphaproteobacteria	Rickettsiales	Mitochondria	uncultured bacterium	uncultured bacterium	0	0	0	0	0	0	0	1	0	0	0	0	0	0	0	0	0	0	5	0	0	0	0	0
OTU_76	Bacteria	Proteobacteria	Alphaproteobacteria	SAR11 clade	Surface 1	unidentified marine bacterioplankton	unidentified marine bacterioplankton	377	743	220	10	93	122	43	15	85	8	5	2	82	510	236	14	33	62	37	29	10	0	14	24
OTU_766	Bacteria	Proteobacteria	Alphaproteobacteria	Parvularculales	Parvularculaceae	Parvularcula	Parvularculaceae bacterium GUDS1168	0	0	0	0	0	0	0	0	0	0	3	0	0	0	0	0	0	0	0	0	3	0	0	0
OTU_767	Bacteria	Proteobacteria	Alphaproteobacteria	Unclassified	Unclassified	Unclassified	Unclassified	6	0	0	1	0	0	0	0	0	0	0	1	0	0	0	0	0	0	0	0	0	0	0	0
OTU_769	Bacteria	Proteobacteria	Alphaproteobacteria	Rhizobiales	Bradyrhizobiaceae	Bradyrhizobium	Unclassified	0	0	0	0	0	0	0	0	0	0	0	0	0	0	0	0	0	0	13	0	0	0	0	0
OTU_77	Bacteria	Proteobacteria	Alphaproteobacteria	SAR11 clade	Deep 1	uncultured bacterium	uncultured bacterium	0	38	62	11	8	36	0	0	14	0	4	0	0	18	94	1	4	14	0	0	3	0	2	1
OTU_774	Bacteria	Proteobacteria	Alphaproteobacteria	Caulobacterales	Hyphomonadaceae	Maricaulis	uncultured bacterium	0	0	0	6	0	0	0	0	11	8	0	0	0	0	0	0	0	0	1	2	0	6	0	0
OTU_8	Bacteria	Proteobacteria	Alphaproteobacteria	Rhodobacterales	Rhodobacteraceae	Sagittula	Sagittula stellata E-37	24	0	0	277	158	69	1	1	7	174	103	146	0	0	2	108	72	77	2	2	194	919	84	244
OTU_80	Bacteria	Proteobacteria	Alphaproteobacteria	Rhodobacterales	Rhodobacteraceae	Unclassified	Unclassified	83	17	5	15	3	6	5	21	3	0	1	7	33	1	0	1	3	0	26	1	0	1	0	36
OTU_802	Bacteria	Proteobacteria	Alphaproteobacteria	Rickettsiales	Holosporaceae	uncultured	uncultured bacterium	0	0	0	0	0	0	0	0	0	0	0	0	0	0	0	0	0	0	3	6	0	0	0	0
OTU_81	Bacteria	Proteobacteria	Alphaproteobacteria	Rhodobacterales	Rhodobacteraceae	Labrenzia	uncultured Labrenzia sp.	1	2	0	12	18	6	0	1	4	0	4	4	1	0	2	9	3	13	0	0	5	0	0	32
OTU_810	Bacteria	Proteobacteria	Alphaproteobacteria	Rhodospirillales	Rhodospirillaceae	Oceanibaculum	Oceanibaculum pacificum	0	0	0	0	5	0	0	0	0	0	0	0	0	0	0	0	0	0	0	0	0	0	0	0
OTU_821	Bacteria	Proteobacteria	Alphaproteobacteria	SAR11 clade	Surface 1	uncultured bacterium	uncultured bacterium	72	114	12	0	1	3	4	2	2	0	0	1	22	55	5	0	2	2	11	15	1	0	0	5
OTU_825	Bacteria	Proteobacteria	Alphaproteobacteria	Rickettsiales	SAR116 clade	uncultured alpha proteobacterium	uncultured alpha proteobacterium	23	0	5	0	1	1	2	1	2	0	0	0	7	5	0	1	0	6	3	1	0	0	0	1
OTU_827	Bacteria	Proteobacteria	Alphaproteobacteria	Sphingomonadales	Sphingomonadaceae	Sphingobium	uncultured bacterium	0	0	0	3	3	1	0	0	4	1	0	0	0	0	0	1	1	1	1	1	3	0	0	6
OTU_829	Bacteria	Proteobacteria	Alphaproteobacteria	Rickettsiales	SAR116 clade	uncultured Rhodospirillaceae bacterium	uncultured Rhodospirillaceae bacterium	0	0	0	0	0	0	0	0	8	0	0	0	0	0	1	0	0	0	0	0	3	0	0	0
OTU_83	Bacteria	Proteobacteria	Alphaproteobacteria	Rickettsiales	SM2D12	Unclassified	Unclassified	9	0	4	33	16	28	0	0	0	6	0	2	0	0	0	5	1	11	0	0	1	0	0	2
OTU_831	Bacteria	Proteobacteria	Alphaproteobacteria	Rhodospirillales	AT-s3-44	uncultured bacterium	uncultured bacterium	0	0	6	0	0	1	0	0	0	0	0	0	0	0	1	0	0	0	0	0	0	0	0	0
OTU_838	Bacteria	Proteobacteria	Alphaproteobacteria	Rhodospirillales	Rhodospirillaceae	uncultured	uncultured alpha proteobacterium	0	0	3	0	9	2	0	0	2	0	0	0	0	0	4	0	0	4	0	0	0	0	1	0
OTU_840	Bacteria	Proteobacteria	Alphaproteobacteria	Rhodospirillales	Rhodospirillaceae	Unclassified	Unclassified	4	0	0	0	0	0	1	0	0	0	0	0	0	0	2	0	0	0	0	0	0	0	0	0
OTU_843	Bacteria	Proteobacteria	Alphaproteobacteria	Rickettsiales	S25-593	uncultured bacterium	uncultured bacterium	12	0	4	0	0	2	4	0	3	0	0	0	6	2	1	1	0	0	10	4	0	0	0	0
OTU_854	Bacteria	Proteobacteria	Alphaproteobacteria	Rickettsiales	Rickettsiaceae	uncultured	uncultured organism	0	0	0	0	0	1	0	0	0	0	0	0	0	0	0	1	0	1	0	0	0	0	0	7
OTU_865	Bacteria	Proteobacteria	Alphaproteobacteria	SAR11 clade	Deep 1	uncultured alpha proteobacterium	uncultured alpha proteobacterium	1	224	152	5	71	69	1	4	109	5	6	3	1	84	191	31	22	30	0	40	39	0	25	44
OTU_866	Bacteria	Proteobacteria	Alphaproteobacteria	SAR11 clade	Deep 1	Unclassified	Unclassified	0	16	3	0	1	4	0	0	1	0	0	0	0	10	2	0	1	0	0	0	0	0	0	0
OTU_873	Bacteria	Proteobacteria	Alphaproteobacteria	Rickettsiales	TK34	uncultured bacterium	uncultured bacterium	0	0	3	0	1	1	0	0	0	0	0	0	0	0	4	0	0	6	0	0	0	0	0	0
OTU_879	Bacteria	Proteobacteria	Alphaproteobacteria	SAR11 clade	Surface 1	Unclassified	Unclassified	0	48	29	1	18	18	0	2	25	0	2	2	0	15	34	1	3	7	0	11	6	0	5	10
OTU_884	Bacteria	Proteobacteria	Alphaproteobacteria	Rhodospirillales	Rhodospirillaceae	uncultured	Unclassified	0	0	0	0	3	0	0	0	0	0	0	0	0	0	0	1	3	0	0	0	0	0	0	0
OTU_886	Bacteria	Proteobacteria	Alphaproteobacteria	Rhodospirillales	AT-s3-44	Unclassified	Unclassified	0	7	0	0	0	0	0	0	0	0	0	0	0	0	3	0	0	0	0	0	0	0	0	0
OTU_895	Bacteria	Proteobacteria	Alphaproteobacteria	Rhodospirillales	Rhodospirillaceae	AEGEAN-169 marine group	alpha proteobacterium SCGC AB-629-F11	0	12	3	0	0	0	0	0	0	0	0	0	0	1	1	0	0	0	0	0	0	0	0	0
OTU_901	Bacteria	Proteobacteria	Alphaproteobacteria	Rickettsiales	Mitochondria	uncultured deep-sea bacterium	uncultured deep-sea bacterium	4	0	0	0	0	0	0	0	0	0	0	0	0	0	0	0	0	0	0	0	0	0	0	0
OTU_91	Bacteria	Proteobacteria	Alphaproteobacteria	Rhodobacterales	Rhodobacteraceae	Albimonas	Albimonas donghaensis	1	0	2	0	3	0	0	1	2	0	0	0	0	4	0	1	0	0	0	83	1	0	8	0
OTU_935	Bacteria	Proteobacteria	Alphaproteobacteria	SAR11 clade	Surface 4	Unclassified	Unclassified	11	27	1	0	0	0	0	0	0	0	0	0	1	3	0	0	0	0	0	5	0	0	0	0
OTU_937	Bacteria	Proteobacteria	Alphaproteobacteria	OCS116 clade	uncultured marine bacterium	uncultured marine bacterium	uncultured marine bacterium	6	0	1	0	0	0	1	0	2	0	0	0	0	0	0	0	0	0	0	0	0	0	0	1
OTU_947	Bacteria	Proteobacteria	Alphaproteobacteria	Rhodospirillales	Rhodospirillaceae	uncultured	Unclassified	0	0	0	0	0	0	0	0	0	0	0	0	0	7	0	0	0	0	0	0	0	0	0	0
OTU_95	Bacteria	Proteobacteria	Alphaproteobacteria	Sphingomonadales	ctg-CGOF202	uncultured organism	uncultured organism	0	0	0	5	9	0	0	0	0	2	0	0	0	0	3	0	8	28	1	1	8	0	13	28
OTU_950	Bacteria	Proteobacteria	Alphaproteobacteria	Sneathiellales	Sneathiellaceae	uncultured	uncultured bacterium	0	0	1	0	4	3	0	0	0	0	0	0	0	0	6	0	0	0	0	0	0	0	0	0
OTU_952	Bacteria	Proteobacteria	Alphaproteobacteria	SAR11 clade	Surface 1	uncultured bacterium	uncultured bacterium	0	20	3	1	0	2	0	0	2	0	0	0	0	17	10	0	0	1	0	0	0	0	0	0
OTU_953	Bacteria	Proteobacteria	Alphaproteobacteria	Rickettsiales	Mitochondria	Proteobacteria bacterium JGI 0000113-D06	Proteobacteria bacterium JGI 0000113-D06	0	0	0	0	0	0	0	0	0	0	0	0	0	0	0	0	0	0	0	0	0	0	2	4
OTU_954	Bacteria	Proteobacteria	Alphaproteobacteria	Rhodospirillales	Rhodospirillaceae	Unclassified	Unclassified	2	0	0	0	0	0	0	0	1	0	0	0	0	0	0	0	0	0	0	0	0	0	0	15
OTU_962	Bacteria	Proteobacteria	Alphaproteobacteria	SAR11 clade	Deep 1	Unclassified	Unclassified	1	161	77	10	17	53	0	4	64	1	2	0	1	43	104	8	9	7	0	17	52	0	14	12
OTU_964	Bacteria	Proteobacteria	Alphaproteobacteria	Rickettsiales	LR A2-29	uncultured bacterium	uncultured bacterium	0	0	0	0	0	0	0	0	0	0	0	0	0	0	0	0	0	0	9	0	0	0	0	0
OTU_970	Bacteria	Proteobacteria	Alphaproteobacteria	SAR11 clade	uncultured bacterium	uncultured bacterium	uncultured bacterium	14	4	10	0	0	1	2	3	5	0	0	0	3	5	3	0	2	0	8	1	3	0	0	2
OTU_972	Bacteria	Proteobacteria	Alphaproteobacteria	Rhodobacterales	Rhodobacteraceae	Unclassified	Unclassified	0	0	0	0	0	6	0	0	0	0	0	0	0	0	0	0	0	0	0	0	0	0	0	0
OTU_977	Bacteria	Proteobacteria	Alphaproteobacteria	Rhodospirillales	Rhodospirillaceae	AEGEAN-169 marine group	Unclassified	0	5	0	0	0	0	0	0	0	0	0	0	0	0	0	0	0	0	0	0	0	0	0	0
OTU_98	Bacteria	Proteobacteria	Alphaproteobacteria	Rhodobacterales	Rhodobacteraceae	Thioclava	Thioclava VS-126	12	0	3	83	232	24	1	0	3	19	29	26	0	0	3	22	39	16	0	0	60	0	1	9
OTU_989	Bacteria	Proteobacteria	Alphaproteobacteria	DB1-14	uncultured bacterium	uncultured bacterium	uncultured bacterium	0	0	0	0	10	0	0	0	0	0	0	0	0	0	0	0	2	0	0	0	0	0	0	0
OTU_1006	Bacteria	Proteobacteria	Betaproteobacteria	Neisseriales	Neisseriaceae	Neisseria	uncultured bacterium	0	0	0	0	0	0	0	5	0	3	0	3	0	0	0	0	0	0	7	0	2	0	2	0
OTU_1025	Bacteria	Proteobacteria	Betaproteobacteria	Burkholderiales	Comamonadaceae	Diaphorobacter	uncultured bacterium	0	0	0	0	0	0	0	0	0	0	0	0	0	0	0	0	0	0	0	0	6	0	0	0
OTU_1037	Bacteria	Proteobacteria	Betaproteobacteria	Rhodocyclales	Rhodocyclaceae	uncultured	bacterium str. 51885	0	0	0	0	0	0	0	0	0	0	0	0	0	0	0	0	0	0	0	0	0	0	19	1
OTU_1092	Bacteria	Proteobacteria	Betaproteobacteria	Nitrosomonadales	Nitrosomonadaceae	uncultured	uncultured Burkholderiaceae bacterium	0	0	0	0	0	3	0	0	0	0	0	0	0	0	0	0	2	0	0	0	0	0	0	0
OTU_1102	Bacteria	Proteobacteria	Betaproteobacteria	Unclassified	Unclassified	Unclassified	Unclassified	1	0	0	0	0	0	0	0	0	0	0	0	5	0	0	0	0	0	3	0	0	0	0	0
OTU_1256	Bacteria	Proteobacteria	Betaproteobacteria	Burkholderiales	Comamonadaceae	Acidovorax	Acidovorax delafieldii	0	0	0	0	0	0	0	0	0	0	0	0	0	7	0	0	1	0	0	6	0	0	0	0
OTU_1257	Bacteria	Proteobacteria	Betaproteobacteria	Burkholderiales	Alcaligenaceae	MWH-UniP1 aquatic group	uncultured bacterium	38	0	0	0	0	0	12	0	1	0	0	0	0	1	0	0	0	0	18	5	0	0	0	0
OTU_1326	Bacteria	Proteobacteria	Betaproteobacteria	Burkholderiales	Oxalobacteraceae	Noviherbaspirillum	Herbaspirillum sp. 6415T-45	0	0	0	0	0	0	0	0	5	0	0	0	0	0	0	0	0	0	0	0	0	0	0	0
OTU_14	Bacteria	Proteobacteria	Betaproteobacteria	Burkholderiales	Burkholderiaceae	Cupriavidus	Cupriavidus sp. DPN1(2001)	0	1	4	0	0	295	0	0	3	7	4	8	2	0	7	219	545	118	2	7	7	0	452	27
OTU_1582	Bacteria	Proteobacteria	Betaproteobacteria	Burkholderiales	Comamonadaceae	Tepidicella	uncultured bacterium	0	0	0	0	0	0	0	0	0	0	0	0	0	0	1	0	0	0	0	0	0	0	7	0
OTU_1675	Bacteria	Proteobacteria	Betaproteobacteria	Burkholderiales	Comamonadaceae	Variovorax	uncultured Variovorax sp.	0	0	0	0	5	0	0	0	0	0	0	0	0	0	0	0	0	0	0	0	0	0	0	0
OTU_1737	Bacteria	Proteobacteria	Betaproteobacteria	Burkholderiales	Oxalobacteraceae	Massilia	uncultured marine bacterium	0	0	2	0	0	4	0	0	0	0	0	0	0	0	0	0	1	4	0	0	0	0	0	0
OTU_1804	Bacteria	Proteobacteria	Betaproteobacteria	Burkholderiales	Oxalobacteraceae	Unclassified	Unclassified	0	0	0	0	1	0	0	0	0	0	0	0	0	0	0	1	0	0	0	0	0	1	0	3
OTU_189	Bacteria	Proteobacteria	Betaproteobacteria	Burkholderiales	Alcaligenaceae	MWH-UniP1 aquatic group	uncultured bacterium	34	0	0	0	0	0	1	0	0	0	0	0	1	0	0	0	0	0	24	0	0	0	0	0
OTU_19	Bacteria	Proteobacteria	Betaproteobacteria	Burkholderiales	Comamonadaceae	Pelomonas	uncultured bacterium	132	2	4	2	5	13	0	0	2	0	0	0	0	13	66	93	61	107	21	113	232	0	173	111
OTU_1945	Bacteria	Proteobacteria	Betaproteobacteria	Burkholderiales	Burkholderiaceae	Burkholderia	uncultured beta proteobacterium	0	0	0	0	0	0	0	0	2	1	0	0	0	0	0	0	0	0	0	0	0	0	0	0
OTU_1971	Bacteria	Proteobacteria	Betaproteobacteria	Burkholderiales	Oxalobacteraceae	Massilia	uncultured marine bacterium	0	0	0	0	0	1	0	0	0	0	0	0	0	0	5	4	0	0	0	0	0	0	0	0
OTU_200	Bacteria	Proteobacteria	Betaproteobacteria	Rhodocyclales	Rhodocyclaceae	Denitromonas	Denitromonas aromaticus	0	0	0	0	0	0	0	0	1	0	0	0	0	0	0	0	1	0	5	0	86	0	0	29
OTU_2006	Bacteria	Proteobacteria	Betaproteobacteria	Neisseriales	Neisseriaceae	Conchiformibius	uncultured bacterium	0	0	0	0	2	0	0	0	0	0	0	0	0	0	0	0	0	0	0	0	0	0	0	0
OTU_2024	Bacteria	Proteobacteria	Betaproteobacteria	Burkholderiales	Burkholderiaceae	Ralstonia	uncultured bacterium	0	0	0	0	0	0	0	0	0	1	1	0	0	0	0	0	0	0	0	0	1	0	1	5
OTU_2164	Bacteria	Proteobacteria	Betaproteobacteria	Rhodocyclales	Rhodocyclaceae	Azoarcus	beta proteobacterium JN18_V62_Y	0	0	0	0	0	0	0	0	0	0	0	0	0	0	0	0	0	0	0	0	3	0	3	0
OTU_226	Bacteria	Proteobacteria	Betaproteobacteria	Neisseriales	Neisseriaceae	Neisseria	uncultured Neisseria sp.	0	0	0	0	0	0	0	0	0	0	0	0	0	0	0	0	0	0	78	0	0	0	0	0
OTU_2343	Bacteria	Proteobacteria	Betaproteobacteria	Burkholderiales	Comamonadaceae	Unclassified	Unclassified	0	0	0	0	0	0	0	0	0	2	0	0	0	0	0	0	0	0	0	0	0	0	0	0
OTU_2500	Bacteria	Proteobacteria	Betaproteobacteria	Burkholderiales	Alcaligenaceae	Castellaniella	uncultured bacterium	0	0	0	0	0	0	0	0	0	0	1	0	0	0	0	0	0	0	0	0	0	0	0	0
OTU_251	Bacteria	Proteobacteria	Betaproteobacteria	Burkholderiales	Alcaligenaceae	MWH-UniP1 aquatic group	uncultured bacterium	36	0	0	0	0	0	7	0	1	0	0	0	2	0	0	0	0	0	7	0	0	0	0	0
OTU_2684	Bacteria	Proteobacteria	Betaproteobacteria	Rhodocyclales	Rhodocyclaceae	Zoogloea	uncultured beta proteobacterium	0	0	0	0	0	0	0	0	0	3	0	0	0	0	0	0	0	0	0	0	0	0	0	0
OTU_2688	Bacteria	Proteobacteria	Betaproteobacteria	Hydrogenophilales	Hydrogenophilaceae	uncultured	uncultured bacterium	0	0	0	0	0	0	0	0	0	0	0	0	0	0	0	0	0	0	0	0	2	0	0	0
OTU_272	Bacteria	Proteobacteria	Betaproteobacteria	Burkholderiales	Burkholderiaceae	Burkholderia	uncultured organism	0	0	0	0	0	7	0	0	0	0	0	0	0	0	0	59	26	1	3	0	0	0	11	3
OTU_2895	Bacteria	Proteobacteria	Betaproteobacteria	Burkholderiales	Comamonadaceae	Unclassified	Unclassified	0	0	0	0	0	0	0	0	0	0	0	0	0	0	0	1	0	0	0	0	1	0	1	0
OTU_3065	Bacteria	Proteobacteria	Betaproteobacteria	Burkholderiales	Burkholderiaceae	Cupriavidus	Cupriavidus sp. DPN1(2001)	0	0	0	0	0	0	0	0	0	0	0	0	0	0	0	1	1	0	0	0	0	0	0	0
OTU_3098	Bacteria	Proteobacteria	Betaproteobacteria	Burkholderiales	Alcaligenaceae	Pusillimonas	uncultured bacterium	0	0	0	0	0	0	0	0	1	0	0	0	0	0	0	0	0	0	0	0	0	0	0	2
OTU_3117	Bacteria	Proteobacteria	Betaproteobacteria	Burkholderiales	Alcaligenaceae	Bordetella	uncultured Achromobacter sp.	0	0	0	0	0	0	0	0	0	0	0	1	0	0	0	0	0	0	0	0	0	0	0	0
OTU_323	Bacteria	Proteobacteria	Betaproteobacteria	Burkholderiales	Comamonadaceae	Curvibacter	uncultured Curvibacter sp.	0	0	0	0	0	0	0	0	0	0	0	0	0	0	0	0	0	0	0	0	0	0	39	0
OTU_3248	Bacteria	Proteobacteria	Betaproteobacteria	Neisseriales	Neisseriaceae	Neisseria	Unclassified	0	0	0	0	0	0	0	0	0	0	0	0	0	0	0	0	0	0	2	0	0	0	0	0
OTU_3297	Bacteria	Proteobacteria	Betaproteobacteria	Burkholderiales	Burkholderiaceae	Cupriavidus	Unclassified	0	0	1	0	0	0	0	0	0	0	0	0	0	0	0	1	0	0	0	0	0	0	0	0
OTU_3311	Bacteria	Proteobacteria	Betaproteobacteria	Rhodocyclales	Rhodocyclaceae	Candidatus Accumulibacter	uncultured bacterium	0	0	0	0	0	0	0	0	0	0	0	0	0	0	0	0	0	0	0	0	5	0	0	0
OTU_3316	Bacteria	Proteobacteria	Betaproteobacteria	Burkholderiales	Alcaligenaceae	Alcaligenes	Alcaligenes faecalis	0	0	0	0	0	0	0	0	0	0	0	0	0	0	0	0	0	0	0	0	5	0	0	0
OTU_3353	Bacteria	Proteobacteria	Betaproteobacteria	Neisseriales	Neisseriaceae	uncultured	uncultured bacterium	0	0	0	0	0	0	0	0	0	0	0	0	0	0	0	0	0	2	0	0	0	0	0	4
OTU_3516	Bacteria	Proteobacteria	Betaproteobacteria	Nitrosomonadales	Gallionellaceae	uncultured	uncultured bacterium	0	0	1	0	0	0	0	0	0	0	0	0	0	0	0	0	0	0	0	0	0	0	0	0
OTU_3611	Bacteria	Proteobacteria	Betaproteobacteria	Burkholderiales	Alcaligenaceae	Unclassified	Unclassified	0	0	0	0	0	0	0	0	0	0	0	0	0	1	0	0	0	0	0	0	0	0	0	0
OTU_3622	Bacteria	Proteobacteria	Betaproteobacteria	Burkholderiales	Comamonadaceae	Comamonas	Comamonas aquatica	0	2	0	0	0	0	0	0	0	0	0	0	0	0	1	0	0	0	0	0	0	0	1	0
OTU_3685	Bacteria	Proteobacteria	Betaproteobacteria	Hydrogenophilales	Hydrogenophilaceae	Sulfuricella	uncultured bacterium	0	0	0	0	0	0	0	0	0	0	1	0	0	0	0	0	0	0	0	0	0	0	0	0
OTU_3748	Bacteria	Proteobacteria	Betaproteobacteria	Burkholderiales	Comamonadaceae	Sphaerotilus	uncultured bacterium	0	0	0	0	0	0	0	0	0	0	0	0	0	0	0	0	0	0	0	0	1	0	0	0
OTU_3804	Bacteria	Proteobacteria	Betaproteobacteria	Burkholderiales	Burkholderiaceae	Cupriavidus	Cupriavidus sp. DPN1(2001)	0	0	0	0	0	0	0	0	0	0	0	0	0	0	0	0	0	0	0	0	0	0	1	0
OTU_3807	Bacteria	Proteobacteria	Betaproteobacteria	Burkholderiales	Comamonadaceae	Unclassified	Unclassified	0	0	0	0	0	0	0	0	0	0	0	0	0	0	0	0	0	0	0	0	1	0	0	0
OTU_382	Bacteria	Proteobacteria	Betaproteobacteria	Burkholderiales	Comamonadaceae	Aquabacterium	uncultured Aquabacterium sp.	0	0	0	0	0	0	0	0	0	0	6	15	0	0	0	0	0	0	0	0	1	0	1	0
OTU_3890	Bacteria	Proteobacteria	Betaproteobacteria	Burkholderiales	Burkholderiaceae	Cupriavidus	Cupriavidus sp. DPN1(2001)	0	0	0	0	0	0	0	0	0	0	0	0	0	0	0	0	0	0	0	0	0	0	0	1
OTU_3901	Bacteria	Proteobacteria	Betaproteobacteria	Neisseriales	Neisseriaceae	Unclassified	Unclassified	0	0	0	0	0	0	0	0	3	0	0	0	0	0	0	0	0	0	0	0	0	0	0	0
OTU_3938	Bacteria	Proteobacteria	Betaproteobacteria	Rhodocyclales	Rhodocyclaceae	Azoarcus	uncultured beta proteobacterium	0	0	0	0	0	0	0	0	0	0	0	0	0	0	0	0	0	1	0	0	0	0	0	0
OTU_4082	Bacteria	Proteobacteria	Betaproteobacteria	Burkholderiales	Comamonadaceae	uncultured	uncultured Comamonadaceae bacterium	0	0	0	0	0	0	0	0	0	0	0	0	0	0	0	0	0	0	0	0	2	0	0	0
OTU_4127	Bacteria	Proteobacteria	Betaproteobacteria	Burkholderiales	Comamonadaceae	Macromonas	uncultured bacterium	0	0	0	0	0	0	0	0	0	0	0	0	0	0	0	0	0	0	0	1	0	0	0	0
OTU_4254	Bacteria	Proteobacteria	Betaproteobacteria	Nitrosomonadales	Nitrosomonadaceae	Nitrosospira	uncultured bacterium	0	0	0	0	0	0	0	0	0	0	0	2	0	0	0	0	0	0	0	0	0	0	0	0
OTU_4298	Bacteria	Proteobacteria	Betaproteobacteria	Burkholderiales	Oxalobacteraceae	Massilia	Massilia timonae	0	0	0	0	0	0	0	0	0	0	0	0	0	0	0	0	0	0	0	0	1	0	0	0
OTU_4327	Bacteria	Proteobacteria	Betaproteobacteria	SC-I-84	Unclassified	Unclassified	Unclassified	0	0	0	0	0	0	0	0	0	1	0	0	0	0	0	0	0	0	0	0	0	0	0	0
OTU_4360	Bacteria	Proteobacteria	Betaproteobacteria	Burkholderiales	Oxalobacteraceae	Janthinobacterium	uncultured bacterium	0	0	0	0	0	0	0	0	0	0	0	1	0	0	0	0	0	0	0	0	0	0	0	0
OTU_4544	Bacteria	Proteobacteria	Betaproteobacteria	Burkholderiales	Burkholderiaceae	Cupriavidus	Cupriavidus sp. DPN1(2001)	0	0	0	0	0	1	0	0	0	0	0	0	0	0	0	0	0	0	0	0	0	0	0	0
OTU_4578	Bacteria	Proteobacteria	Betaproteobacteria	Burkholderiales	Burkholderiaceae	Cupriavidus	Cupriavidus sp. DPN1(2001)	0	0	0	0	0	1	0	0	0	0	0	0	0	0	0	0	0	0	0	0	0	0	1	0
OTU_4582	Bacteria	Proteobacteria	Betaproteobacteria	Burkholderiales	Comamonadaceae	Unclassified	Unclassified	0	0	0	0	0	0	0	0	0	0	0	0	0	0	0	0	0	0	0	1	0	0	0	0
OTU_4746	Bacteria	Proteobacteria	Betaproteobacteria	Unclassified	Unclassified	Unclassified	Unclassified	1	0	0	0	0	0	0	0	1	0	0	0	0	0	0	0	0	0	0	0	0	0	0	0
OTU_4942	Bacteria	Proteobacteria	Betaproteobacteria	Burkholderiales	Oxalobacteraceae	Massilia	Unclassified	0	0	0	0	0	0	0	0	0	0	0	0	0	0	0	0	0	0	0	0	0	0	0	1
OTU_4968	Bacteria	Proteobacteria	Betaproteobacteria	Burkholderiales	Comamonadaceae	Delftia	uncultured bacterium	0	0	0	0	0	0	0	2	0	2	0	0	0	0	0	0	0	0	0	0	0	0	0	0
OTU_4983	Bacteria	Proteobacteria	Betaproteobacteria	Burkholderiales	Comamonadaceae	Unclassified	Unclassified	0	0	0	0	0	0	0	0	0	0	0	0	0	0	0	0	0	0	0	0	1	0	0	0
OTU_5027	Bacteria	Proteobacteria	Betaproteobacteria	Burkholderiales	Alcaligenaceae	Pusillimonas	uncultured bacterium	0	0	0	0	1	0	0	0	0	0	0	0	0	0	0	0	0	0	0	0	0	0	0	0
OTU_5041	Bacteria	Proteobacteria	Betaproteobacteria	Burkholderiales	Oxalobacteraceae	Noviherbaspirillum	Unclassified	0	0	1	0	0	0	0	0	0	0	0	1	0	0	0	0	0	0	0	0	0	0	0	0
OTU_5115	Bacteria	Proteobacteria	Betaproteobacteria	Burkholderiales	Alcaligenaceae	Unclassified	Unclassified	0	0	0	0	0	0	0	0	0	0	0	0	0	0	2	0	0	0	0	0	0	0	0	0
OTU_5223	Bacteria	Proteobacteria	Betaproteobacteria	Methylophilales	Methylophilaceae	Methylophilus	uncultured bacterium	0	0	0	0	0	0	0	0	0	0	0	0	0	0	0	0	0	0	0	0	0	0	0	3
OTU_5231	Bacteria	Proteobacteria	Betaproteobacteria	Burkholderiales	Burkholderiaceae	Cupriavidus	Cupriavidus sp. DPN1(2001)	0	0	0	0	0	0	0	0	0	0	0	0	0	0	0	0	0	0	0	0	0	0	0	1
OTU_5299	Bacteria	Proteobacteria	Betaproteobacteria	Methylophilales	Methylophilaceae	Methylotenera	uncultured beta proteobacterium	0	0	0	0	0	0	0	0	0	0	0	0	0	0	0	0	0	0	0	0	1	0	0	0
OTU_5317	Bacteria	Proteobacteria	Betaproteobacteria	Burkholderiales	Alcaligenaceae	Castellaniella	uncultured bacterium	0	1	0	0	0	0	0	0	0	0	0	0	0	0	0	0	0	0	0	0	0	0	0	0
OTU_5564	Bacteria	Proteobacteria	Betaproteobacteria	Burkholderiales	Comamonadaceae	Pelomonas	uncultured bacterium	7	1	1	0	0	2	0	0	0	0	0	0	0	0	3	6	2	5	0	4	17	0	2	9
OTU_567	Bacteria	Proteobacteria	Betaproteobacteria	Burkholderiales	Burkholderiaceae	Lautropia	uncultured Lautropia sp.	0	0	0	0	0	0	0	3	0	0	0	12	0	0	0	0	0	0	11	0	0	0	0	0
OTU_5757	Bacteria	Proteobacteria	Betaproteobacteria	Burkholderiales	Burkholderiaceae	Unclassified	Unclassified	0	0	0	0	0	0	0	0	0	0	0	0	0	0	0	0	0	0	0	0	1	0	0	0
OTU_5910	Bacteria	Proteobacteria	Betaproteobacteria	Rhodocyclales	Rhodocyclaceae	uncultured	uncultured anaerobic bacterium	0	0	0	0	0	0	0	0	0	0	0	0	0	0	1	0	0	0	0	0	0	0	0	0
OTU_6103	Bacteria	Proteobacteria	Betaproteobacteria	Rhodocyclales	Rhodocyclaceae	Thauera	uncultured bacterium	0	0	0	0	0	0	0	0	0	0	1	0	0	0	0	0	0	0	0	0	1	0	0	0
OTU_6256	Bacteria	Proteobacteria	Betaproteobacteria	Burkholderiales	Comamonadaceae	Schlegelella	uncultured bacterium	0	0	0	0	0	0	0	0	0	0	0	0	0	0	0	0	0	0	0	0	1	0	0	0
OTU_6286	Bacteria	Proteobacteria	Betaproteobacteria	Burkholderiales	Oxalobacteraceae	Noviherbaspirillum	Unclassified	0	0	0	0	0	0	0	0	0	0	1	0	0	0	0	0	0	0	0	0	0	0	0	0
OTU_6297	Bacteria	Proteobacteria	Betaproteobacteria	Burkholderiales	Comamonadaceae	Comamonas	Unclassified	0	0	0	0	0	0	0	0	0	0	1	0	0	0	0	0	0	0	0	0	0	0	0	0
OTU_6381	Bacteria	Proteobacteria	Betaproteobacteria	Burkholderiales	Burkholderiaceae	Cupriavidus	Cupriavidus sp. DPN1(2001)	0	0	0	0	0	1	0	0	0	0	0	0	0	0	0	0	0	0	0	0	0	0	0	0
OTU_6389	Bacteria	Proteobacteria	Betaproteobacteria	Burkholderiales	Burkholderiaceae	Cupriavidus	Cupriavidus sp. DPN1(2001)	0	0	0	0	0	0	0	0	0	0	0	0	0	0	0	0	0	0	0	0	0	0	1	0
OTU_6437	Bacteria	Proteobacteria	Betaproteobacteria	Nitrosomonadales	Nitrosomonadaceae	uncultured	uncultured Burkholderiaceae bacterium	0	0	0	0	0	0	0	0	0	0	0	0	0	0	1	0	0	0	0	0	0	0	0	0
OTU_763	Bacteria	Proteobacteria	Betaproteobacteria	Burkholderiales	Oxalobacteraceae	Massilia	uncultured Massilia sp.	0	0	0	0	0	0	0	5	0	0	0	0	0	0	0	0	0	0	0	0	5	0	7	0
OTU_776	Bacteria	Proteobacteria	Betaproteobacteria	Unclassified	Unclassified	Unclassified	Unclassified	10	0	0	0	0	1	0	0	0	0	0	0	0	0	0	0	0	0	0	0	0	0	0	0
OTU_942	Bacteria	Proteobacteria	Betaproteobacteria	Burkholderiales	Burkholderiaceae	Limnobacter	uncultured bacterium	0	0	0	0	0	0	0	0	0	0	0	0	0	0	0	0	0	0	6	0	0	0	0	3
OTU_1002	Bacteria	Proteobacteria	Deltaproteobacteria	Desulfobacterales	Nitrospinaceae	Nitrospina	uncultured bacterium	0	2	0	0	0	0	0	0	0	0	0	0	0	4	0	0	0	0	0	0	0	0	0	0
OTU_1010	Bacteria	Proteobacteria	Deltaproteobacteria	Bdellovibrionales	Bdellovibrionaceae	OM27 clade	uncultured bacterium	0	0	0	0	0	0	0	0	0	0	0	0	0	0	0	0	0	0	0	0	0	0	4	2
OTU_1028	Bacteria	Proteobacteria	Deltaproteobacteria	Bdellovibrionales	Bacteriovoracaceae	uncultured	uncultured deep-sea bacterium	0	0	0	0	1	4	0	0	0	0	0	0	0	0	3	0	0	2	0	2	0	0	0	0
OTU_1032	Bacteria	Proteobacteria	Deltaproteobacteria	SAR324 clade(Marine group B)	Unclassified	Unclassified	Unclassified	0	0	0	0	0	0	0	0	6	0	0	0	0	0	0	0	0	0	0	1	0	0	0	0
OTU_1035	Bacteria	Proteobacteria	Deltaproteobacteria	Bdellovibrionales	Bdellovibrionaceae	OM27 clade	uncultured bacterium	0	0	0	0	0	0	0	0	0	0	0	0	0	0	2	0	0	0	0	9	1	0	0	0
OTU_1046	Bacteria	Proteobacteria	Deltaproteobacteria	Desulfuromonadales	GR-WP33-58	uncultured delta proteobacterium	uncultured delta proteobacterium	0	0	0	0	0	0	0	0	0	0	0	0	0	0	0	0	0	0	0	0	0	0	0	4
OTU_1051	Bacteria	Proteobacteria	Deltaproteobacteria	Desulfuromonadales	GR-WP33-58	unidentified marine bacterioplankton	unidentified marine bacterioplankton	0	0	1	1	0	9	0	0	0	0	0	0	0	0	0	0	0	0	0	0	0	0	0	0
OTU_1054	Bacteria	Proteobacteria	Deltaproteobacteria	Desulfobacterales	Nitrospinaceae	Nitrospina	uncultured bacterium	0	0	4	0	0	1	0	0	33	0	0	0	0	2	14	0	2	2	0	0	0	0	0	0
OTU_1060	Bacteria	Proteobacteria	Deltaproteobacteria	Bdellovibrionales	Bacteriovoracaceae	Peredibacter	Unclassified	1	0	0	1	0	0	0	0	0	0	0	0	0	3	0	0	0	0	0	10	0	0	0	0
OTU_1062	Bacteria	Proteobacteria	Deltaproteobacteria	GR-WP33-30	uncultured delta proteobacterium	uncultured delta proteobacterium	uncultured delta proteobacterium	0	0	0	0	0	0	0	0	0	0	0	0	0	0	0	0	0	0	8	0	0	0	0	3
OTU_1063	Bacteria	Proteobacteria	Deltaproteobacteria	Oligoflexales	Oligoflexaceae	uncultured bacterium	uncultured bacterium	0	0	0	0	0	0	0	0	0	0	0	0	0	0	0	0	0	0	1	0	0	0	7	6
OTU_1086	Bacteria	Proteobacteria	Deltaproteobacteria	Oligoflexales	Oligoflexaceae	uncultured delta proteobacterium	uncultured delta proteobacterium	6	0	0	0	0	0	0	0	0	0	0	0	0	0	0	0	0	0	0	0	0	0	0	0
OTU_1105	Bacteria	Proteobacteria	Deltaproteobacteria	Desulfuromonadales	GR-WP33-58	Unclassified	Unclassified	0	0	0	0	0	0	0	0	0	0	0	0	0	0	0	0	0	0	0	0	0	0	2	4
OTU_1108	Bacteria	Proteobacteria	Deltaproteobacteria	Bdellovibrionales	Bdellovibrionaceae	OM27 clade	uncultured bacterium	0	1	0	0	0	0	0	2	0	0	0	0	0	0	0	0	0	0	1	0	0	0	0	1
OTU_1113	Bacteria	Proteobacteria	Deltaproteobacteria	Unclassified	Unclassified	Unclassified	Unclassified	0	0	3	0	0	0	0	2	2	0	0	0	0	1	1	1	0	6	0	2	0	0	0	3
OTU_1115	Bacteria	Proteobacteria	Deltaproteobacteria	Myxococcales	Unclassified	Unclassified	Unclassified	0	0	0	0	0	0	0	0	0	0	0	0	0	0	0	0	0	0	0	0	6	0	0	0
OTU_1122	Bacteria	Proteobacteria	Deltaproteobacteria	Sh765B-TzT-29	uncultured bacterium	uncultured bacterium	uncultured bacterium	0	0	0	0	14	2	0	0	0	0	1	0	0	0	0	5	1	5	0	0	0	0	0	0
OTU_1125	Bacteria	Proteobacteria	Deltaproteobacteria	Bdellovibrionales	Bdellovibrionaceae	OM27 clade	uncultured bacterium	0	0	0	0	1	0	0	0	0	0	0	0	0	0	0	0	0	1	0	1	0	0	5	0
OTU_1128	Bacteria	Proteobacteria	Deltaproteobacteria	Desulfuromonadales	GR-WP33-58	uncultured deep-sea bacterium	uncultured deep-sea bacterium	0	0	0	0	0	0	0	1	2	0	0	0	0	0	0	0	0	0	0	6	4	0	0	7
OTU_1133	Bacteria	Proteobacteria	Deltaproteobacteria	Myxococcales	Sandaracinaceae	Sandaracinus	uncultured bacterium	0	0	0	0	0	0	0	0	2	0	0	0	0	0	0	0	0	1	0	0	11	0	0	1
OTU_1134	Bacteria	Proteobacteria	Deltaproteobacteria	GR-WP33-30	uncultured delta proteobacterium	uncultured delta proteobacterium	uncultured delta proteobacterium	0	0	0	1	1	0	0	0	8	1	1	1	0	0	0	2	0	3	0	0	6	0	5	7
OTU_1135	Bacteria	Proteobacteria	Deltaproteobacteria	Desulfuromonadales	GR-WP33-58	uncultured delta proteobacterium DeepAnt-1F12	uncultured delta proteobacterium DeepAnt-1F12	0	4	0	0	0	0	0	0	1	0	0	0	0	0	0	0	0	0	0	0	0	0	3	5
OTU_1145	Bacteria	Proteobacteria	Deltaproteobacteria	Unclassified	Unclassified	Unclassified	Unclassified	0	0	0	0	0	0	0	0	0	0	0	0	0	0	0	0	0	0	0	0	12	0	0	0
OTU_1150	Bacteria	Proteobacteria	Deltaproteobacteria	Bdellovibrionales	Bdellovibrionaceae	OM27 clade	uncultured delta proteobacterium	0	7	3	0	0	0	0	0	0	0	0	0	0	1	2	0	0	0	3	5	9	0	0	9
OTU_1153	Bacteria	Proteobacteria	Deltaproteobacteria	Desulfobacterales	Nitrospinaceae	uncultured	uncultured bacterium	0	0	3	0	9	2	0	0	0	0	0	0	0	0	2	1	3	0	0	0	0	0	0	0
OTU_1156	Bacteria	Proteobacteria	Deltaproteobacteria	Bdellovibrionales	Bdellovibrionaceae	OM27 clade	uncultured bacterium	0	1	0	0	0	0	0	0	4	0	0	0	0	1	0	0	0	0	0	2	8	0	4	0
OTU_1160	Bacteria	Proteobacteria	Deltaproteobacteria	SAR324 clade(Marine group B)	uncultured bacterium	uncultured bacterium	uncultured bacterium	0	3	0	0	0	0	0	0	0	0	0	0	0	4	1	0	0	0	0	0	0	0	0	0
OTU_1167	Bacteria	Proteobacteria	Deltaproteobacteria	Desulfuromonadales	GR-WP33-58	uncultured delta proteobacterium DeepAnt-1F12	uncultured delta proteobacterium DeepAnt-1F12	0	0	6	0	0	2	0	0	5	0	0	0	0	1	6	0	0	1	0	0	7	0	0	2
OTU_1179	Bacteria	Proteobacteria	Deltaproteobacteria	Bdellovibrionales	Bdellovibrionaceae	OM27 clade	Unclassified	0	0	0	0	0	0	0	7	0	0	0	0	0	0	0	0	0	0	0	0	0	0	0	0
OTU_1188	Bacteria	Proteobacteria	Deltaproteobacteria	Sh765B-TzT-29	uncultured sediment bacterium	uncultured sediment bacterium	uncultured sediment bacterium	0	0	0	0	1	0	0	0	0	0	0	0	0	0	0	0	0	0	0	0	0	0	4	2
OTU_119	Bacteria	Proteobacteria	Deltaproteobacteria	Desulfobacterales	Nitrospinaceae	Nitrospina	uncultured marine bacterium	0	29	76	1	5	10	0	1	30	0	0	0	0	41	77	23	3	12	0	1	13	0	4	0
OTU_1200	Bacteria	Proteobacteria	Deltaproteobacteria	Myxococcales	P3OB-42	uncultured bacterium	uncultured bacterium	0	0	5	0	0	0	0	2	6	0	0	0	0	0	1	0	1	0	0	9	0	0	0	0
OTU_1208	Bacteria	Proteobacteria	Deltaproteobacteria	Myxococcales	Blfdi19	Unclassified	Unclassified	0	0	0	0	0	0	0	0	0	0	0	0	0	0	0	0	0	0	5	0	0	0	0	0
OTU_1222	Bacteria	Proteobacteria	Deltaproteobacteria	SAR324 clade(Marine group B)	uncultured bacterium	uncultured bacterium	uncultured bacterium	4	0	0	1	0	0	0	1	2	0	0	0	2	0	0	0	0	0	0	0	0	0	0	3
OTU_1236	Bacteria	Proteobacteria	Deltaproteobacteria	Desulfurellales	Desulfurellaceae	uncultured	Alteromonas sp. Gp-3-7.1	0	4	0	0	0	0	0	0	0	0	0	0	0	2	0	0	0	0	0	0	0	0	0	0
OTU_1237	Bacteria	Proteobacteria	Deltaproteobacteria	Desulfuromonadales	Unclassified	Unclassified	Unclassified	0	0	1	0	1	0	0	0	0	0	0	0	0	0	0	0	0	0	0	0	1	0	0	7
OTU_1239	Bacteria	Proteobacteria	Deltaproteobacteria	Desulfuromonadales	GR-WP33-58	Unclassified	Unclassified	0	0	0	0	0	0	0	0	0	0	0	0	1	0	0	0	0	1	0	1	0	0	0	10
OTU_1252	Bacteria	Proteobacteria	Deltaproteobacteria	Sh765B-TzT-29	uncultured bacterium	uncultured bacterium	uncultured bacterium	0	0	3	0	1	4	0	0	10	0	0	0	0	0	0	0	0	1	0	0	0	0	7	15
OTU_1255	Bacteria	Proteobacteria	Deltaproteobacteria	Bdellovibrionales	Bdellovibrionaceae	OM27 clade	Unclassified	0	0	0	0	1	1	0	0	0	0	0	1	0	0	0	0	0	0	0	0	2	0	4	4
OTU_1271	Bacteria	Proteobacteria	Deltaproteobacteria	Myxococcales	Haliangiaceae	Haliangium	uncultured delta proteobacterium	0	0	0	0	0	1	0	0	6	0	0	0	0	0	1	0	0	0	0	1	5	0	0	1
OTU_1278	Bacteria	Proteobacteria	Deltaproteobacteria	Sh765B-TzT-29	uncultured bacterium	uncultured bacterium	uncultured bacterium	0	2	0	0	0	0	0	13	3	0	0	0	0	1	0	0	0	0	0	1	1	0	0	0
OTU_1293	Bacteria	Proteobacteria	Deltaproteobacteria	Myxococcales	Nannocystaceae	uncultured	uncultured Enhygromyxa sp.	0	0	0	0	0	0	0	0	0	0	0	0	0	1	0	0	0	0	0	5	1	0	0	0
OTU_1300	Bacteria	Proteobacteria	Deltaproteobacteria	Myxococcales	Eel-36e1D6	uncultured bacterium	uncultured bacterium	0	0	0	0	0	2	0	0	0	0	0	0	0	0	0	0	1	0	0	0	6	0	0	4
OTU_1302	Bacteria	Proteobacteria	Deltaproteobacteria	Myxococcales	Haliangiaceae	Haliangium	uncultured deep-sea bacterium	0	0	0	0	0	0	0	0	0	0	0	0	0	0	0	0	0	0	0	0	0	0	8	0
OTU_1309	Bacteria	Proteobacteria	Deltaproteobacteria	Sh765B-TzT-29	uncultured Gemmatimonadetes bacterium	uncultured Gemmatimonadetes bacterium	uncultured Gemmatimonadetes bacterium	0	0	3	2	1	5	0	1	1	4	1	0	0	0	6	3	2	0	0	0	4	0	27	29
OTU_1311	Bacteria	Proteobacteria	Deltaproteobacteria	Bdellovibrionales	Bdellovibrionaceae	OM27 clade	uncultured bacterium	0	0	0	0	0	0	0	0	0	0	0	0	0	0	0	0	0	0	0	0	0	0	2	3
OTU_1316	Bacteria	Proteobacteria	Deltaproteobacteria	Sh765B-TzT-29	uncultured bacterium	uncultured bacterium	uncultured bacterium	0	0	2	0	0	5	0	0	8	0	0	1	0	0	2	0	0	2	0	1	9	0	8	19
OTU_1317	Bacteria	Proteobacteria	Deltaproteobacteria	Sh765B-TzT-29	uncultured delta proteobacterium	uncultured delta proteobacterium	uncultured delta proteobacterium	0	0	0	0	0	0	2	0	0	0	0	0	0	0	0	0	0	0	13	0	0	0	0	0
OTU_1321	Bacteria	Proteobacteria	Deltaproteobacteria	Bdellovibrionales	Bdellovibrionaceae	OM27 clade	uncultured bacterium	0	0	0	0	0	0	0	0	0	0	0	0	0	0	0	0	0	0	0	8	0	0	0	0
OTU_1323	Bacteria	Proteobacteria	Deltaproteobacteria	Bdellovibrionales	Bdellovibrionaceae	OM27 clade	Unclassified	0	0	0	0	0	0	0	3	0	0	0	0	0	0	0	0	0	0	0	5	0	0	0	0
OTU_1331	Bacteria	Proteobacteria	Deltaproteobacteria	Sh765B-TzT-29	uncultured delta proteobacterium	uncultured delta proteobacterium	uncultured delta proteobacterium	0	0	4	0	0	0	0	5	52	1	0	1	0	1	2	0	0	0	2	16	29	0	5	0
OTU_1338	Bacteria	Proteobacteria	Deltaproteobacteria	Myxococcales	Nannocystaceae	uncultured	uncultured Myxococcales bacterium	0	0	0	0	0	0	0	0	0	0	0	0	1	0	0	0	0	0	3	0	0	0	0	0
OTU_1346	Bacteria	Proteobacteria	Deltaproteobacteria	Desulfobacterales	Nitrospinaceae	Nitrospina	uncultured bacterium	0	6	0	0	0	0	0	0	0	0	0	0	0	2	0	0	0	0	0	0	0	0	0	0
OTU_1365	Bacteria	Proteobacteria	Deltaproteobacteria	Desulfuromonadales	GR-WP33-58	Unclassified	Unclassified	0	0	0	0	0	1	0	0	0	0	0	1	0	0	0	0	0	0	0	0	0	0	0	20
OTU_1366	Bacteria	Proteobacteria	Deltaproteobacteria	Desulfobacterales	Nitrospinaceae	Nitrospina	uncultured bacterium	0	0	0	0	0	2	0	0	0	0	0	0	0	0	0	0	0	1	0	0	0	0	0	5
OTU_1368	Bacteria	Proteobacteria	Deltaproteobacteria	Bdellovibrionales	Bdellovibrionaceae	OM27 clade	uncultured bacterium	0	0	0	0	0	0	0	0	1	0	0	0	0	0	0	0	0	0	0	0	0	0	5	0
OTU_1370	Bacteria	Proteobacteria	Deltaproteobacteria	Desulfuromonadales	Unclassified	Unclassified	Unclassified	0	2	2	0	0	0	0	4	0	0	0	0	0	0	1	0	0	0	0	3	0	0	0	0
OTU_1399	Bacteria	Proteobacteria	Deltaproteobacteria	Bdellovibrionales	Bdellovibrionaceae	Bdellovibrio	uncultured bacterium	0	0	0	0	0	0	0	0	0	0	0	0	0	0	0	0	0	0	0	0	0	0	4	0
OTU_1401	Bacteria	Proteobacteria	Deltaproteobacteria	Sh765B-TzT-29	uncultured bacterium	uncultured bacterium	uncultured bacterium	0	4	0	0	0	0	0	1	0	0	0	0	0	0	0	0	0	0	0	9	0	0	0	0
OTU_1403	Bacteria	Proteobacteria	Deltaproteobacteria	Sh765B-TzT-29	uncultured delta proteobacterium	uncultured delta proteobacterium	uncultured delta proteobacterium	0	0	0	0	0	0	0	2	0	0	0	0	0	0	0	0	0	0	19	0	0	0	0	1
OTU_1404	Bacteria	Proteobacteria	Deltaproteobacteria	Bdellovibrionales	Bacteriovoracaceae	uncultured	uncultured Bacteriovoracaceae bacterium	0	7	0	0	0	3	0	1	0	0	0	0	0	2	0	0	0	0	0	1	0	0	0	0
OTU_1409	Bacteria	Proteobacteria	Deltaproteobacteria	Bdellovibrionales	Bdellovibrionaceae	OM27 clade	uncultured bacterium	0	0	0	0	0	0	0	0	3	0	0	0	0	0	0	1	0	0	0	1	1	0	0	0
OTU_1416	Bacteria	Proteobacteria	Deltaproteobacteria	Myxococcales	Eel-36e1D6	uncultured bacterium	uncultured bacterium	0	0	0	0	1	0	0	0	0	0	0	0	0	0	0	0	0	0	0	0	0	0	3	2
OTU_1421	Bacteria	Proteobacteria	Deltaproteobacteria	Bdellovibrionales	Bacteriovoracaceae	Peredibacter	uncultured proteobacterium	1	2	0	9	1	0	0	0	0	0	0	0	0	0	0	0	0	2	0	0	0	0	0	0
OTU_1424	Bacteria	Proteobacteria	Deltaproteobacteria	Desulfobacterales	Nitrospinaceae	Nitrospina	uncultured bacterium	0	6	0	0	0	0	0	0	0	0	0	0	0	0	0	0	0	0	0	0	0	0	0	0
OTU_1425	Bacteria	Proteobacteria	Deltaproteobacteria	Bdellovibrionales	Bdellovibrionaceae	OM27 clade	uncultured bacterium	0	0	0	0	0	0	0	4	0	0	0	0	0	0	0	0	0	0	0	10	0	0	0	0
OTU_1432	Bacteria	Proteobacteria	Deltaproteobacteria	Desulfuromonadales	Unclassified	Unclassified	Unclassified	0	0	3	0	0	0	0	2	1	0	0	0	0	1	2	0	0	0	0	0	0	0	0	0
OTU_1439	Bacteria	Proteobacteria	Deltaproteobacteria	Bdellovibrionales	Bacteriovoracaceae	Peredibacter	uncultured Peredibacter sp.	0	0	3	0	0	0	0	0	0	0	0	0	0	0	1	0	0	0	0	0	0	0	0	0
OTU_1447	Bacteria	Proteobacteria	Deltaproteobacteria	Desulfuromonadales	GR-WP33-58	uncultured delta proteobacterium	uncultured delta proteobacterium	0	0	0	0	0	0	0	0	0	0	0	0	0	0	0	0	0	0	2	0	0	0	0	0
OTU_1454	Bacteria	Proteobacteria	Deltaproteobacteria	Bdellovibrionales	Bdellovibrionaceae	OM27 clade	Unclassified	0	0	0	0	0	0	0	0	0	0	0	0	0	0	0	0	0	0	0	0	0	0	3	0
OTU_1456	Bacteria	Proteobacteria	Deltaproteobacteria	Oligoflexales	Oligoflexaceae	uncultured bacterium	uncultured bacterium	3	3	3	0	0	0	0	0	0	0	0	0	1	1	0	0	0	0	0	0	0	0	0	0
OTU_1472	Bacteria	Proteobacteria	Deltaproteobacteria	Bdellovibrionales	Bdellovibrionaceae	OM27 clade	uncultured bacterium	0	0	0	0	0	1	0	0	0	0	1	0	0	0	0	0	0	0	0	0	1	0	0	1
OTU_1480	Bacteria	Proteobacteria	Deltaproteobacteria	Bdellovibrionales	Bdellovibrionaceae	OM27 clade	uncultured bacterium	0	0	0	0	0	1	0	0	4	0	0	2	0	0	1	0	0	0	0	0	2	0	0	0
OTU_1482	Bacteria	Proteobacteria	Deltaproteobacteria	SAR324 clade(Marine group B)	uncultured SAR324 cluster bacterium	uncultured SAR324 cluster bacterium	uncultured SAR324 cluster bacterium	0	13	512	21	30	72	0	11	881	0	14	3	0	31	808	52	39	88	1	25	36	0	43	45
OTU_1486	Bacteria	Proteobacteria	Deltaproteobacteria	Bdellovibrionales	Bdellovibrionaceae	OM27 clade	uncultured delta proteobacterium	0	0	0	0	0	1	0	0	0	0	0	0	1	0	0	0	0	0	0	0	0	0	0	0
OTU_1492	Bacteria	Proteobacteria	Deltaproteobacteria	Oligoflexales	Oligoflexaceae	Unclassified	Unclassified	12	0	0	0	0	0	0	0	0	0	0	0	0	0	1	0	0	0	5	0	0	0	0	0
OTU_1504	Bacteria	Proteobacteria	Deltaproteobacteria	Bdellovibrionales	Bdellovibrionaceae	OM27 clade	uncultured bacterium	0	2	0	0	0	0	0	1	0	0	0	0	0	0	0	0	0	0	0	2	0	0	0	0
OTU_1505	Bacteria	Proteobacteria	Deltaproteobacteria	Sh765B-TzT-29	uncultured deep-sea bacterium	uncultured deep-sea bacterium	uncultured deep-sea bacterium	0	0	0	0	0	0	0	0	22	0	0	0	0	0	6	0	0	0	0	1	15	0	0	0
OTU_1511	Bacteria	Proteobacteria	Deltaproteobacteria	Sh765B-TzT-29	uncultured bacterium	uncultured bacterium	uncultured bacterium	0	0	0	0	0	3	0	0	14	0	3	2	0	0	0	0	0	1	0	0	8	0	3	8
OTU_1517	Bacteria	Proteobacteria	Deltaproteobacteria	Desulfobacterales	Nitrospinaceae	Nitrospina	uncultured bacterium	0	0	8	0	0	0	0	0	10	0	0	0	0	0	11	0	0	0	0	0	24	0	0	0
OTU_1519	Bacteria	Proteobacteria	Deltaproteobacteria	Myxococcales	P3OB-42	uncultured marine microorganism	uncultured marine microorganism	0	0	0	0	0	0	0	0	0	0	0	0	0	2	0	0	0	0	0	0	0	0	0	0
OTU_1526	Bacteria	Proteobacteria	Deltaproteobacteria	SAR324 clade(Marine group B)	uncultured SAR324 cluster bacterium	uncultured SAR324 cluster bacterium	uncultured SAR324 cluster bacterium	0	44	0	0	0	0	0	4	0	0	0	0	0	46	0	0	1	0	0	1	0	0	0	4
OTU_1527	Bacteria	Proteobacteria	Deltaproteobacteria	Oligoflexales	Oligoflexaceae	Unclassified	Unclassified	0	0	0	0	0	0	0	0	0	0	0	0	0	0	1	2	0	0	0	0	0	0	12	0
OTU_1534	Bacteria	Proteobacteria	Deltaproteobacteria	Myxococcales	Nannocystaceae	uncultured	uncultured delta proteobacterium	0	0	0	0	0	0	0	0	0	0	0	0	0	0	0	0	0	0	13	2	0	0	0	2
OTU_1539	Bacteria	Proteobacteria	Deltaproteobacteria	Desulfobacterales	Nitrospinaceae	Nitrospina	Unclassified	0	0	0	0	0	0	0	0	0	0	0	0	0	2	0	0	0	0	0	0	0	0	0	0
OTU_1540	Bacteria	Proteobacteria	Deltaproteobacteria	Desulfuromonadales	GR-WP33-58	uncultured bacterium	uncultured bacterium	0	0	0	0	0	0	0	0	1	0	0	0	0	0	0	0	0	0	0	4	0	0	0	0
OTU_155	Bacteria	Proteobacteria	Deltaproteobacteria	Desulfobacterales	Nitrospinaceae	Nitrospina	uncultured delta proteobacterium	0	290	3	0	0	1	0	4	0	0	0	0	0	137	0	0	0	0	0	9	0	0	0	0
OTU_1554	Bacteria	Proteobacteria	Deltaproteobacteria	Myxococcales	Haliangiaceae	Haliangium	uncultured deep-sea bacterium	0	0	0	0	0	0	0	0	0	0	0	0	0	0	0	0	0	0	0	0	0	0	3	2
OTU_1563	Bacteria	Proteobacteria	Deltaproteobacteria	Bdellovibrionales	Bdellovibrionaceae	OM27 clade	uncultured bacterium	0	1	0	0	0	4	0	0	0	0	0	0	0	3	7	0	0	1	0	0	2	0	0	0
OTU_1566	Bacteria	Proteobacteria	Deltaproteobacteria	Bdellovibrionales	Bdellovibrionaceae	OM27 clade	uncultured bacterium	0	2	0	0	0	0	0	0	1	0	0	0	0	0	0	0	1	4	0	0	4	0	0	2
OTU_1568	Bacteria	Proteobacteria	Deltaproteobacteria	Sh765B-TzT-29	uncultured bacterium	uncultured bacterium	uncultured bacterium	0	0	0	0	0	0	0	0	0	0	0	0	0	0	0	0	0	0	0	0	0	0	1	7
OTU_1569	Bacteria	Proteobacteria	Deltaproteobacteria	Desulfuromonadales	GR-WP33-58	uncultured delta proteobacterium	uncultured delta proteobacterium	0	0	0	0	0	0	0	0	2	3	1	0	0	0	0	0	0	0	0	0	9	0	8	2
OTU_1573	Bacteria	Proteobacteria	Deltaproteobacteria	Desulfuromonadales	GR-WP33-58	uncultured delta proteobacterium HF0010_08B07	uncultured delta proteobacterium HF0010_08B07	0	0	0	0	0	0	0	0	0	0	0	0	0	0	0	0	0	0	5	0	0	0	0	3
OTU_1574	Bacteria	Proteobacteria	Deltaproteobacteria	Myxococcales	27F-1492R	uncultured bacterium	uncultured bacterium	0	0	0	0	0	0	0	0	0	0	0	0	0	0	0	0	0	0	0	4	0	0	0	0
OTU_1584	Bacteria	Proteobacteria	Deltaproteobacteria	Bdellovibrionales	Bdellovibrionaceae	OM27 clade	uncultured delta proteobacterium	0	3	0	0	0	0	0	0	0	0	0	0	0	0	0	0	0	0	0	0	2	0	0	0
OTU_1588	Bacteria	Proteobacteria	Deltaproteobacteria	Desulfuromonadales	GR-WP33-58	uncultured delta proteobacterium	uncultured delta proteobacterium	0	1	0	0	0	0	0	3	0	0	0	0	0	3	0	0	0	0	0	3	1	0	0	0
OTU_160	Bacteria	Proteobacteria	Deltaproteobacteria	Bdellovibrionales	Bdellovibrionaceae	OM27 clade	Unclassified	0	0	1	0	0	1	0	2	21	0	0	0	0	0	0	0	1	1	1	5	22	0	0	7
OTU_1602	Bacteria	Proteobacteria	Deltaproteobacteria	Bdellovibrionales	Bacteriovoracaceae	uncultured	uncultured bacterium	11	0	0	0	0	1	0	0	0	0	0	0	0	0	0	0	0	0	0	0	0	0	0	0
OTU_1623	Bacteria	Proteobacteria	Deltaproteobacteria	Sh765B-TzT-29	uncultured delta proteobacterium	uncultured delta proteobacterium	uncultured delta proteobacterium	0	0	0	0	0	0	0	0	0	0	0	0	0	0	0	0	0	0	4	0	0	0	0	0
OTU_1626	Bacteria	Proteobacteria	Deltaproteobacteria	Myxococcales	Eel-36e1D6	uncultured delta proteobacterium	uncultured delta proteobacterium	0	1	1	0	0	0	0	0	0	0	0	0	0	0	1	1	0	0	0	6	0	0	0	0
OTU_1630	Bacteria	Proteobacteria	Deltaproteobacteria	Desulfuromonadales	Unclassified	Unclassified	Unclassified	0	0	0	0	0	0	0	2	2	0	0	0	0	0	0	0	0	0	0	0	6	0	0	1
OTU_1632	Bacteria	Proteobacteria	Deltaproteobacteria	Bdellovibrionales	Bdellovibrionaceae	OM27 clade	uncultured delta proteobacterium	0	0	2	0	1	0	0	0	1	0	0	0	0	0	0	0	0	0	0	0	3	0	0	1
OTU_1637	Bacteria	Proteobacteria	Deltaproteobacteria	Myxococcales	Unclassified	Unclassified	Unclassified	0	0	0	0	0	0	0	0	0	0	0	0	0	4	0	0	0	0	0	0	0	0	0	0
OTU_1640	Bacteria	Proteobacteria	Deltaproteobacteria	Desulfobacterales	Nitrospinaceae	Nitrospina	Unclassified	0	1	0	0	0	0	0	0	0	0	0	0	0	4	0	0	0	0	0	0	0	0	0	0
OTU_1665	Bacteria	Proteobacteria	Deltaproteobacteria	Myxococcales	Unclassified	Unclassified	Unclassified	0	6	1	0	0	0	0	0	0	8	0	0	0	0	0	0	0	0	0	0	0	0	0	0
OTU_1674	Bacteria	Proteobacteria	Deltaproteobacteria	GR-WP33-30	uncultured bacterium	uncultured bacterium	uncultured bacterium	0	0	0	0	0	0	0	0	0	0	0	0	0	0	0	0	0	0	3	0	0	0	0	0
OTU_1677	Bacteria	Proteobacteria	Deltaproteobacteria	Desulfobacterales	Nitrospinaceae	Nitrospina	uncultured delta proteobacterium	0	0	0	0	0	0	0	0	0	0	0	0	0	0	0	0	0	0	4	0	0	0	0	1
OTU_1695	Bacteria	Proteobacteria	Deltaproteobacteria	GR-WP33-30	Unclassified	Unclassified	Unclassified	0	0	2	2	1	0	0	0	6	0	0	0	0	0	0	0	0	0	0	0	0	0	0	0
OTU_1700	Bacteria	Proteobacteria	Deltaproteobacteria	Sh765B-TzT-29	uncultured delta proteobacterium	uncultured delta proteobacterium	uncultured delta proteobacterium	0	0	0	0	0	1	0	0	0	0	0	1	0	0	0	0	0	2	0	0	5	0	6	20
OTU_1707	Bacteria	Proteobacteria	Deltaproteobacteria	Oligoflexales	Oligoflexaceae	Unclassified	Unclassified	0	0	0	0	0	0	0	0	0	0	0	0	0	2	0	0	0	0	0	0	0	0	0	0
OTU_1708	Bacteria	Proteobacteria	Deltaproteobacteria	Bdellovibrionales	Bacteriovoracaceae	Peredibacter	uncultured bacterium	0	0	0	0	0	0	0	0	0	2	0	0	0	0	0	0	0	0	0	4	0	0	0	0
OTU_1716	Bacteria	Proteobacteria	Deltaproteobacteria	Desulfuromonadales	GR-WP33-58	Unclassified	Unclassified	0	2	0	0	8	0	0	0	0	0	0	0	0	0	1	0	1	0	0	0	0	0	0	0
OTU_1717	Bacteria	Proteobacteria	Deltaproteobacteria	Myxococcales	P3OB-42	uncultured delta proteobacterium	uncultured delta proteobacterium	0	4	0	0	0	0	0	0	0	0	0	0	0	0	0	0	0	0	0	0	0	0	0	0
OTU_1722	Bacteria	Proteobacteria	Deltaproteobacteria	Desulfobacterales	Nitrospinaceae	Nitrospina	uncultured bacterium	0	2	0	0	0	0	0	0	0	0	0	0	0	0	0	0	0	0	0	5	0	0	0	0
OTU_1730	Bacteria	Proteobacteria	Deltaproteobacteria	Unclassified	Unclassified	Unclassified	Unclassified	0	0	1	0	0	0	0	0	0	0	0	0	0	0	3	0	0	0	0	0	0	0	0	0
OTU_1732	Bacteria	Proteobacteria	Deltaproteobacteria	Bdellovibrionales	Bacteriovoracaceae	Peredibacter	uncultured bacterium	0	0	1	1	0	1	0	0	1	0	0	1	0	1	0	0	0	0	2	0	0	0	0	0
OTU_1733	Bacteria	Proteobacteria	Deltaproteobacteria	Desulfuromonadales	GR-WP33-58	uncultured deep-sea bacterium	uncultured deep-sea bacterium	0	0	0	0	0	0	0	0	0	0	0	0	0	1	0	0	0	2	0	0	0	0	0	0
OTU_1742	Bacteria	Proteobacteria	Deltaproteobacteria	Bdellovibrionales	Bacteriovoracaceae	Peredibacter	uncultured bacterium	8	0	0	0	0	2	0	0	0	0	0	0	0	0	0	0	0	2	0	0	0	0	0	0
OTU_1743	Bacteria	Proteobacteria	Deltaproteobacteria	Sh765B-TzT-29	uncultured bacterium	uncultured bacterium	uncultured bacterium	0	1	0	0	0	0	0	0	0	0	0	0	0	1	0	0	0	0	0	5	0	0	0	0
OTU_1744	Bacteria	Proteobacteria	Deltaproteobacteria	Desulfuromonadales	GR-WP33-58	uncultured delta proteobacterium DeepAnt-1F12	uncultured delta proteobacterium DeepAnt-1F12	0	0	0	0	0	0	0	0	0	0	0	0	0	0	0	0	0	0	0	0	0	0	0	10
OTU_1754	Bacteria	Proteobacteria	Deltaproteobacteria	Bdellovibrionales	Bdellovibrionaceae	OM27 clade	unidentified marine bacterioplankton	0	0	0	0	0	0	0	0	0	0	0	0	3	0	0	0	0	0	0	0	0	0	0	0
OTU_1757	Bacteria	Proteobacteria	Deltaproteobacteria	Unclassified	Unclassified	Unclassified	Unclassified	0	0	0	0	0	0	0	0	0	0	0	0	0	0	0	0	2	1	0	0	0	0	0	2
OTU_1760	Bacteria	Proteobacteria	Deltaproteobacteria	SAR324 clade(Marine group B)	uncultured SAR324 cluster bacterium	uncultured SAR324 cluster bacterium	uncultured SAR324 cluster bacterium	2	5	17	1	3	17	0	0	36	1	2	1	6	14	31	3	9	20	3	0	1	0	4	20
OTU_1768	Bacteria	Proteobacteria	Deltaproteobacteria	Desulfuromonadales	Unclassified	Unclassified	Unclassified	0	0	0	0	0	0	0	0	0	0	2	0	0	0	1	0	0	0	0	0	0	0	0	0
OTU_1769	Bacteria	Proteobacteria	Deltaproteobacteria	Sh765B-TzT-29	uncultured bacterium	uncultured bacterium	uncultured bacterium	0	0	0	0	0	1	0	0	0	0	0	1	0	0	0	0	0	0	0	0	0	0	0	10
OTU_1770	Bacteria	Proteobacteria	Deltaproteobacteria	Bdellovibrionales	Bacteriovoracaceae	uncultured	Unclassified	0	3	0	0	0	0	0	0	0	0	0	0	0	0	0	0	0	0	0	0	0	0	0	0
OTU_1774	Bacteria	Proteobacteria	Deltaproteobacteria	Desulfuromonadales	GR-WP33-58	uncultured bacterium	uncultured bacterium	0	0	0	0	0	2	0	0	2	0	0	0	0	0	0	0	0	1	1	1	0	0	0	0
OTU_1803	Bacteria	Proteobacteria	Deltaproteobacteria	Bdellovibrionales	Bacteriovoracaceae	Peredibacter	uncultured bacterium	0	0	0	0	0	1	0	0	0	0	0	0	0	0	0	0	0	0	0	0	0	0	0	5
OTU_1813	Bacteria	Proteobacteria	Deltaproteobacteria	Sh765B-TzT-29	Unclassified	Unclassified	Unclassified	0	0	0	1	0	0	0	0	0	0	0	0	0	0	0	0	1	0	0	0	0	0	1	10
OTU_1822	Bacteria	Proteobacteria	Deltaproteobacteria	Sh765B-TzT-29	marine metagenome	marine metagenome	marine metagenome	1	0	0	0	0	0	0	0	0	0	0	0	2	2	0	0	0	0	0	0	0	0	0	0
OTU_1823	Bacteria	Proteobacteria	Deltaproteobacteria	Unclassified	Unclassified	Unclassified	Unclassified	0	0	1	0	0	0	0	0	1	0	0	0	0	0	0	0	0	0	0	0	3	0	0	0
OTU_1824	Bacteria	Proteobacteria	Deltaproteobacteria	Bdellovibrionales	Bdellovibrionaceae	OM27 clade	uncultured delta proteobacterium	0	0	0	0	0	0	0	0	0	0	0	0	1	0	0	0	0	0	0	0	2	0	0	0
OTU_1828	Bacteria	Proteobacteria	Deltaproteobacteria	Desulfuromonadales	GR-WP33-58	uncultured delta proteobacterium	uncultured delta proteobacterium	0	0	0	0	0	0	0	3	0	0	0	0	0	0	0	0	0	0	0	0	0	0	0	0
OTU_1829	Bacteria	Proteobacteria	Deltaproteobacteria	Desulfuromonadales	Unclassified	Unclassified	Unclassified	0	0	0	0	0	0	0	0	0	0	0	0	0	0	0	0	0	0	0	0	0	0	0	3
OTU_1830	Bacteria	Proteobacteria	Deltaproteobacteria	Bdellovibrionales	Bacteriovoracaceae	uncultured	uncultured Bacteriovoracaceae bacterium	9	0	0	0	0	0	0	0	0	0	0	0	2	1	0	0	0	0	0	0	0	0	0	17
OTU_1832	Bacteria	Proteobacteria	Deltaproteobacteria	Sh765B-TzT-29	uncultured bacterium	uncultured bacterium	uncultured bacterium	0	0	0	0	0	0	0	0	1	0	0	0	0	0	0	0	0	0	0	0	3	0	0	0
OTU_1836	Bacteria	Proteobacteria	Deltaproteobacteria	Desulfuromonadales	GR-WP33-58	uncultured delta proteobacterium DeepAnt-1F12	uncultured delta proteobacterium DeepAnt-1F12	0	0	0	0	0	0	0	0	5	0	0	0	0	0	2	0	0	0	0	0	0	0	0	0
OTU_1840	Bacteria	Proteobacteria	Deltaproteobacteria	Bdellovibrionales	Bacteriovoracaceae	uncultured	Unclassified	11	0	0	0	0	0	0	0	0	0	0	0	0	0	0	0	0	0	2	0	0	0	0	0
OTU_1846	Bacteria	Proteobacteria	Deltaproteobacteria	Sh765B-TzT-29	uncultured bacterium	uncultured bacterium	uncultured bacterium	0	0	0	3	1	2	0	1	0	0	0	1	0	0	2	4	4	0	0	1	4	0	10	0
OTU_185	Bacteria	Proteobacteria	Deltaproteobacteria	Desulfobacterales	Nitrospinaceae	Nitrospina	uncultured delta proteobacterium	0	1	46	11	16	38	0	0	28	1	0	2	0	0	40	8	18	45	0	1	23	0	11	8
OTU_1852	Bacteria	Proteobacteria	Deltaproteobacteria	Desulfuromonadales	GR-WP33-58	uncultured deep-sea bacterium	uncultured deep-sea bacterium	0	0	0	0	0	0	0	0	1	0	0	0	1	2	0	0	0	0	0	1	0	0	0	2
OTU_1856	Bacteria	Proteobacteria	Deltaproteobacteria	Unclassified	Unclassified	Unclassified	Unclassified	0	0	0	0	0	2	0	0	0	0	0	0	0	0	0	0	0	0	0	0	0	0	0	5
OTU_1858	Bacteria	Proteobacteria	Deltaproteobacteria	Desulfuromonadales	GR-WP33-58	Unclassified	Unclassified	0	0	2	0	0	0	0	0	0	0	0	0	0	0	0	0	0	0	0	1	0	0	0	0
OTU_1863	Bacteria	Proteobacteria	Deltaproteobacteria	Sh765B-TzT-29	Unclassified	Unclassified	Unclassified	0	0	0	0	0	0	0	0	0	0	2	0	0	0	0	0	1	0	0	0	0	0	3	2
OTU_1866	Bacteria	Proteobacteria	Deltaproteobacteria	Desulfuromonadales	GR-WP33-58	uncultured delta proteobacterium	uncultured delta proteobacterium	0	0	0	0	0	0	0	0	0	0	0	0	0	0	0	0	0	0	9	0	0	0	0	0
OTU_1869	Bacteria	Proteobacteria	Deltaproteobacteria	Sh765B-TzT-29	Unclassified	Unclassified	Unclassified	0	0	0	0	0	0	0	0	0	0	0	1	0	0	0	0	0	6	0	0	0	0	1	2
OTU_1891	Bacteria	Proteobacteria	Deltaproteobacteria	Bdellovibrionales	Bdellovibrionaceae	OM27 clade	Unclassified	0	0	0	0	0	0	0	0	0	0	0	0	0	0	0	0	0	0	1	0	0	0	0	1
OTU_1894	Bacteria	Proteobacteria	Deltaproteobacteria	Myxococcales	Blfdi19	uncultured deep-sea bacterium	uncultured deep-sea bacterium	0	0	1	0	0	0	0	0	0	0	0	0	0	0	5	0	0	4	0	0	0	0	0	0
OTU_1903	Bacteria	Proteobacteria	Deltaproteobacteria	Bdellovibrionales	Bdellovibrionaceae	OM27 clade	uncultured bacterium	0	0	0	0	0	0	0	0	0	0	0	0	0	0	1	0	0	0	7	0	0	0	0	0
OTU_1909	Bacteria	Proteobacteria	Deltaproteobacteria	Myxococcales	MSB-4B10	uncultured bacterium	uncultured bacterium	0	0	0	0	0	0	0	0	0	0	0	0	0	1	6	0	0	0	0	0	0	0	0	0
OTU_1928	Bacteria	Proteobacteria	Deltaproteobacteria	Myxococcales	Haliangiaceae	Haliangium	uncultured deep-sea bacterium	0	0	0	0	0	0	0	1	0	0	0	0	0	0	0	0	0	0	0	7	0	0	0	4
OTU_1944	Bacteria	Proteobacteria	Deltaproteobacteria	Desulfobacterales	Nitrospinaceae	Nitrospina	uncultured Nitrospina sp.	0	0	0	0	0	0	0	0	0	0	0	0	0	5	0	0	0	0	0	0	0	0	0	0
OTU_1960	Bacteria	Proteobacteria	Deltaproteobacteria	Bdellovibrionales	Bdellovibrionaceae	OM27 clade	uncultured bacterium	0	0	0	0	0	1	0	0	0	0	0	0	0	0	0	0	0	0	0	0	0	0	1	0
OTU_1974	Bacteria	Proteobacteria	Deltaproteobacteria	Sh765B-TzT-29	uncultured bacterium	uncultured bacterium	uncultured bacterium	0	0	2	0	0	1	0	0	0	0	0	0	0	0	0	0	0	0	0	0	0	0	0	0
OTU_1975	Bacteria	Proteobacteria	Deltaproteobacteria	Oligoflexales	Oligoflexaceae	uncultured bacterium	uncultured bacterium	0	0	12	0	0	0	0	0	0	0	0	0	0	0	1	0	0	0	0	0	0	0	0	0
OTU_1984	Bacteria	Proteobacteria	Deltaproteobacteria	Oligoflexales	Oligoflexaceae	uncultured bacterium	uncultured bacterium	10	0	0	0	0	0	0	0	0	0	0	0	0	0	0	0	0	0	0	0	0	0	0	0
OTU_1987	Bacteria	Proteobacteria	Deltaproteobacteria	Bdellovibrionales	Bacteriovoracaceae	uncultured	uncultured delta proteobacterium	4	4	0	0	0	0	0	1	0	0	0	0	0	3	2	1	0	0	0	0	0	0	0	1
OTU_2007	Bacteria	Proteobacteria	Deltaproteobacteria	Oligoflexales	Unclassified	Unclassified	Unclassified	0	0	0	0	0	0	0	0	0	0	0	0	0	0	0	0	5	1	0	0	0	0	0	0
OTU_2022	Bacteria	Proteobacteria	Deltaproteobacteria	Unclassified	Unclassified	Unclassified	Unclassified	0	0	2	0	0	2	0	0	0	0	0	0	0	0	3	0	0	0	0	0	0	0	0	0
OTU_2036	Bacteria	Proteobacteria	Deltaproteobacteria	Desulfuromonadales	GR-WP33-58	uncultured deep-sea bacterium	uncultured deep-sea bacterium	0	0	1	0	0	0	0	0	7	0	0	0	0	0	0	0	0	0	0	0	4	0	0	0
OTU_2038	Bacteria	Proteobacteria	Deltaproteobacteria	Unclassified	Unclassified	Unclassified	Unclassified	0	1	0	0	0	1	0	0	2	0	0	0	0	0	0	0	0	0	0	1	7	0	0	0
OTU_2041	Bacteria	Proteobacteria	Deltaproteobacteria	Myxococcales	P3OB-42	uncultured delta proteobacterium	uncultured delta proteobacterium	0	0	0	0	0	0	0	3	0	0	0	0	0	0	0	0	0	0	0	6	0	0	0	0
OTU_2066	Bacteria	Proteobacteria	Deltaproteobacteria	Oligoflexales	Oligoflexaceae	uncultured bacterium	uncultured bacterium	0	0	0	0	0	0	0	0	0	0	0	0	0	1	0	0	0	0	0	0	0	0	0	0
OTU_2081	Bacteria	Proteobacteria	Deltaproteobacteria	SAR324 clade(Marine group B)	uncultured SAR324 cluster bacterium	uncultured SAR324 cluster bacterium	uncultured SAR324 cluster bacterium	1	10	0	0	0	0	0	0	0	0	0	0	3	7	0	0	0	0	0	0	0	0	0	0
OTU_2085	Bacteria	Proteobacteria	Deltaproteobacteria	Oligoflexales	Oligoflexaceae	uncultured bacterium	uncultured bacterium	0	1	1	0	0	0	0	0	0	0	0	0	0	1	1	0	0	0	0	0	0	0	0	0
OTU_2087	Bacteria	Proteobacteria	Deltaproteobacteria	Desulfuromonadales	GR-WP33-58	uncultured delta proteobacterium	uncultured delta proteobacterium	3	0	0	0	0	0	0	0	0	0	0	0	0	0	0	0	0	0	0	0	0	0	0	0
OTU_21	Bacteria	Proteobacteria	Deltaproteobacteria	SAR324 clade(Marine group B)	uncultured SAR324 cluster bacterium	uncultured SAR324 cluster bacterium	uncultured SAR324 cluster bacterium	0	273	798	20	79	144	0	10	680	7	7	11	1	388	1109	75	97	157	5	39	28	0	79	56
OTU_2109	Bacteria	Proteobacteria	Deltaproteobacteria	Bdellovibrionales	Bacteriovoracaceae	Peredibacter	uncultured delta proteobacterium	0	0	0	0	0	0	0	0	0	0	0	0	0	0	1	1	0	0	0	0	0	0	0	0
OTU_2114	Bacteria	Proteobacteria	Deltaproteobacteria	Oligoflexales	Oligoflexaceae	uncultured bacterium	uncultured bacterium	0	0	0	0	0	0	0	0	0	0	0	0	0	0	0	0	0	0	1	0	0	0	0	0
OTU_2128	Bacteria	Proteobacteria	Deltaproteobacteria	Desulfobacterales	Nitrospinaceae	Nitrospina	Unclassified	0	0	0	0	0	0	0	0	0	0	0	0	0	1	0	0	0	0	0	0	0	0	0	0
OTU_2134	Bacteria	Proteobacteria	Deltaproteobacteria	Oligoflexales	Oligoflexaceae	uncultured bacterium	uncultured bacterium	0	0	0	0	0	0	0	0	0	0	0	0	3	0	0	0	0	0	0	0	0	0	0	0
OTU_2141	Bacteria	Proteobacteria	Deltaproteobacteria	Myxococcales	P3OB-42	uncultured bacterium	uncultured bacterium	0	1	0	0	3	0	0	3	0	0	0	0	0	1	1	0	0	0	0	0	3	0	1	2
OTU_2146	Bacteria	Proteobacteria	Deltaproteobacteria	Desulfuromonadales	Unclassified	Unclassified	Unclassified	0	0	0	0	0	0	0	0	0	0	0	0	0	0	0	0	0	0	0	0	0	0	1	0
OTU_2154	Bacteria	Proteobacteria	Deltaproteobacteria	Desulfuromonadales	GR-WP33-58	Unclassified	Unclassified	0	0	0	0	0	0	0	0	0	0	0	0	0	0	0	0	0	0	0	0	0	0	0	1
OTU_2156	Bacteria	Proteobacteria	Deltaproteobacteria	Unclassified	Unclassified	Unclassified	Unclassified	0	0	0	0	0	0	0	0	0	0	0	0	0	0	0	0	0	0	0	6	0	0	0	7
OTU_2166	Bacteria	Proteobacteria	Deltaproteobacteria	Bdellovibrionales	Bdellovibrionaceae	OM27 clade	uncultured proteobacterium	0	1	0	0	0	0	0	0	0	0	0	0	0	0	0	0	0	0	0	0	3	0	5	1
OTU_2172	Bacteria	Proteobacteria	Deltaproteobacteria	Sh765B-TzT-29	uncultured delta proteobacterium	uncultured delta proteobacterium	uncultured delta proteobacterium	0	0	0	0	0	0	0	0	0	0	1	0	0	0	0	0	0	1	0	0	0	0	2	0
OTU_2175	Bacteria	Proteobacteria	Deltaproteobacteria	Sh765B-TzT-29	uncultured prokaryote	uncultured prokaryote	uncultured prokaryote	0	0	0	0	0	0	0	0	0	0	0	0	0	0	0	0	0	0	0	0	1	0	2	2
OTU_2181	Bacteria	Proteobacteria	Deltaproteobacteria	Desulfuromonadales	GR-WP33-58	uncultured delta proteobacterium	uncultured delta proteobacterium	0	0	0	0	0	1	0	0	0	0	0	0	0	0	0	0	0	0	0	0	0	0	0	2
OTU_2193	Bacteria	Proteobacteria	Deltaproteobacteria	Oligoflexales	Oligoflexaceae	uncultured bacterium	uncultured bacterium	0	1	0	0	0	0	0	0	0	0	0	0	0	0	0	0	0	0	0	0	0	0	0	0
OTU_2197	Bacteria	Proteobacteria	Deltaproteobacteria	Desulfuromonadales	GR-WP33-58	uncultured deep-sea bacterium	uncultured deep-sea bacterium	0	2	0	0	0	0	0	0	0	0	0	0	0	0	0	2	0	0	0	0	0	0	0	0
OTU_2201	Bacteria	Proteobacteria	Deltaproteobacteria	Desulfobacterales	Nitrospinaceae	Nitrospina	uncultured marine bacterium	0	4	0	0	0	0	0	0	0	0	0	0	0	2	0	0	0	0	0	0	0	0	0	0
OTU_2202	Bacteria	Proteobacteria	Deltaproteobacteria	Unclassified	Unclassified	Unclassified	Unclassified	0	0	2	0	0	0	0	0	0	0	0	0	0	0	0	0	0	1	0	0	2	0	0	0
OTU_2204	Bacteria	Proteobacteria	Deltaproteobacteria	SAR324 clade(Marine group B)	uncultured delta proteobacterium HF0200_39N20	uncultured delta proteobacterium HF0200_39N20	uncultured delta proteobacterium HF0200_39N20	0	116	1	0	0	0	0	0	0	0	0	0	1	131	0	0	0	0	0	1	0	0	0	1
OTU_221	Bacteria	Proteobacteria	Deltaproteobacteria	SAR324 clade(Marine group B)	uncultured SAR324 cluster bacterium	uncultured SAR324 cluster bacterium	uncultured SAR324 cluster bacterium	16	996	8	0	2	2	1	1	2	0	0	0	10	1054	15	1	0	0	3	20	0	0	0	18
OTU_2215	Bacteria	Proteobacteria	Deltaproteobacteria	Unclassified	Unclassified	Unclassified	Unclassified	0	0	0	0	0	0	0	0	0	0	0	0	0	0	0	0	0	0	0	5	0	0	0	0
OTU_2217	Bacteria	Proteobacteria	Deltaproteobacteria	Myxococcales	Haliangiaceae	Haliangium	bacterium enrichment culture clone Anammox_65	0	0	0	0	0	0	0	0	2	0	0	0	0	0	0	1	0	0	5	0	0	0	0	0
OTU_2224	Bacteria	Proteobacteria	Deltaproteobacteria	Desulfuromonadales	Unclassified	Unclassified	Unclassified	0	0	0	0	0	0	0	0	0	0	0	0	0	0	0	0	0	0	0	5	0	0	0	0
OTU_2228	Bacteria	Proteobacteria	Deltaproteobacteria	Desulfuromonadales	GR-WP33-58	Unclassified	Unclassified	0	0	0	0	0	0	0	0	0	0	0	0	0	0	0	0	0	0	0	2	0	0	0	0
OTU_2230	Bacteria	Proteobacteria	Deltaproteobacteria	Oligoflexales	Oligoflexaceae	Unclassified	Unclassified	0	0	1	0	0	0	0	0	0	0	0	0	0	0	0	0	0	0	0	0	3	0	0	0
OTU_2234	Bacteria	Proteobacteria	Deltaproteobacteria	Sh765B-TzT-29	uncultured bacterium	uncultured bacterium	uncultured bacterium	0	0	0	0	0	0	0	0	3	0	0	0	0	0	0	0	0	0	0	0	2	0	0	7
OTU_2241	Bacteria	Proteobacteria	Deltaproteobacteria	Myxococcales	Haliangiaceae	Haliangium	uncultured prokaryote	0	0	0	0	0	0	0	0	0	0	0	0	0	0	0	0	0	0	0	0	3	0	0	0
OTU_2243	Bacteria	Proteobacteria	Deltaproteobacteria	Desulfuromonadales	GR-WP33-58	uncultured bacterium GR-WP33-58	uncultured bacterium GR-WP33-58	0	0	0	0	0	0	0	0	0	0	0	0	0	0	0	0	0	0	0	0	4	0	0	0
OTU_2252	Bacteria	Proteobacteria	Deltaproteobacteria	SAR324 clade(Marine group B)	uncultured SAR324 cluster bacterium	uncultured SAR324 cluster bacterium	uncultured SAR324 cluster bacterium	0	0	4	0	0	1	0	0	4	0	0	0	0	0	9	0	0	0	0	0	0	0	0	1
OTU_2260	Bacteria	Proteobacteria	Deltaproteobacteria	Myxococcales	Eel-36e1D6	uncultured delta proteobacterium	uncultured delta proteobacterium	0	0	3	0	0	0	0	0	1	0	0	0	0	0	0	0	0	2	0	0	0	0	0	0
OTU_2272	Bacteria	Proteobacteria	Deltaproteobacteria	Desulfobacterales	Nitrospinaceae	Nitrospina	marine metagenome	0	0	0	0	0	0	0	0	0	0	0	0	0	0	0	0	1	0	0	0	0	0	0	0
OTU_2273	Bacteria	Proteobacteria	Deltaproteobacteria	Oligoflexales	Oligoflexaceae	uncultured sediment bacterium	uncultured sediment bacterium	0	0	0	0	2	0	0	0	0	0	0	2	0	0	0	0	1	0	0	0	0	0	0	0
OTU_2291	Bacteria	Proteobacteria	Deltaproteobacteria	SAR324 clade(Marine group B)	uncultured delta proteobacterium HF0200_39N20	uncultured delta proteobacterium HF0200_39N20	uncultured delta proteobacterium HF0200_39N20	0	1	0	0	0	0	0	0	0	0	0	0	0	0	0	0	0	0	0	0	0	0	0	0
OTU_230	Bacteria	Proteobacteria	Deltaproteobacteria	Sh765B-TzT-29	uncultured deep-sea bacterium	uncultured deep-sea bacterium	uncultured deep-sea bacterium	0	2	16	1	9	3	0	0	41	0	5	1	0	0	12	24	3	5	0	1	62	0	21	30
OTU_2302	Bacteria	Proteobacteria	Deltaproteobacteria	GR-WP33-30	uncultured Dongia sp.	uncultured Dongia sp.	uncultured Dongia sp.	0	0	0	0	0	0	0	5	0	0	0	0	0	0	0	0	0	0	0	1	0	0	0	0
OTU_2309	Bacteria	Proteobacteria	Deltaproteobacteria	Myxococcales	P3OB-42	Unclassified	Unclassified	0	3	0	0	0	0	0	0	0	0	0	0	0	0	0	0	0	0	0	0	0	0	0	0
OTU_2327	Bacteria	Proteobacteria	Deltaproteobacteria	Myxococcales	P3OB-42	uncultured bacterium	uncultured bacterium	0	0	0	0	0	0	0	0	0	0	0	0	0	0	1	0	0	0	0	0	0	0	0	0
OTU_2333	Bacteria	Proteobacteria	Deltaproteobacteria	Myxococcales	Eel-36e1D6	uncultured bacterium	uncultured bacterium	0	0	0	0	0	0	0	0	0	0	0	0	0	0	0	3	0	0	0	0	0	0	0	0
OTU_2344	Bacteria	Proteobacteria	Deltaproteobacteria	Myxococcales	Blfdi19	uncultured delta proteobacterium	uncultured delta proteobacterium	0	4	3	0	0	0	0	0	2	0	0	0	0	0	0	0	0	0	0	0	0	0	0	0
OTU_2348	Bacteria	Proteobacteria	Deltaproteobacteria	GR-WP33-30	Unclassified	Unclassified	Unclassified	0	0	0	0	4	1	0	0	0	0	0	0	0	0	0	1	0	7	0	0	0	0	0	0
OTU_2358	Bacteria	Proteobacteria	Deltaproteobacteria	Bdellovibrionales	Unclassified	Unclassified	Unclassified	0	0	0	0	0	1	0	0	3	0	0	0	0	0	0	0	0	0	0	0	3	0	0	8
OTU_2363	Bacteria	Proteobacteria	Deltaproteobacteria	Myxococcales	P3OB-42	Unclassified	Unclassified	0	0	0	0	0	0	0	4	1	0	0	0	0	0	0	0	0	0	0	2	2	0	0	0
OTU_2364	Bacteria	Proteobacteria	Deltaproteobacteria	Desulfuromonadales	GR-WP33-58	Unclassified	Unclassified	0	2	0	0	0	0	0	0	3	0	0	0	0	0	0	0	0	0	0	0	0	0	0	0
OTU_2367	Bacteria	Proteobacteria	Deltaproteobacteria	Sh765B-TzT-29	Unclassified	Unclassified	Unclassified	0	0	0	0	0	0	0	0	1	0	0	0	0	0	0	0	0	0	0	0	0	0	0	0
OTU_2373	Bacteria	Proteobacteria	Deltaproteobacteria	Desulfuromonadales	Unclassified	Unclassified	Unclassified	0	0	0	0	0	0	0	0	0	0	0	0	0	0	0	0	0	0	0	0	5	0	1	3
OTU_2376	Bacteria	Proteobacteria	Deltaproteobacteria	Desulfuromonadales	GR-WP33-58	uncultured delta proteobacterium	uncultured delta proteobacterium	0	0	3	0	0	3	0	0	2	0	0	0	0	0	2	0	2	2	0	1	1	0	1	0
OTU_2379	Bacteria	Proteobacteria	Deltaproteobacteria	Myxococcales	P3OB-42	uncultured bacterium	uncultured bacterium	0	0	0	0	0	0	0	1	0	0	0	0	0	0	0	0	0	0	0	0	5	0	0	2
OTU_2391	Bacteria	Proteobacteria	Deltaproteobacteria	Desulfuromonadales	GR-WP33-58	uncultured Geobacteraceae bacterium	uncultured Geobacteraceae bacterium	0	0	0	0	0	0	0	0	0	0	0	0	0	0	0	0	0	0	0	0	3	0	0	3
OTU_2394	Bacteria	Proteobacteria	Deltaproteobacteria	Myxococcales	Sandaracinaceae	Sandaracinus	uncultured bacterium	0	0	0	0	0	0	0	0	0	0	0	0	0	0	0	0	0	0	0	0	0	1	0	0
OTU_2401	Bacteria	Proteobacteria	Deltaproteobacteria	Sh765B-TzT-29	uncultured deep-sea bacterium	uncultured deep-sea bacterium	uncultured deep-sea bacterium	0	0	0	0	0	1	0	0	0	0	0	4	0	0	0	0	0	0	0	0	0	0	0	5
OTU_2408	Bacteria	Proteobacteria	Deltaproteobacteria	Unclassified	Unclassified	Unclassified	Unclassified	0	1	1	0	0	2	0	3	0	0	0	0	0	0	0	0	0	0	0	0	0	0	0	0
OTU_2410	Bacteria	Proteobacteria	Deltaproteobacteria	Desulfuromonadales	GR-WP33-58	uncultured deep-sea bacterium	uncultured deep-sea bacterium	0	1	0	0	0	2	0	0	0	0	0	0	0	1	2	0	1	0	0	0	0	0	2	1
OTU_2414	Bacteria	Proteobacteria	Deltaproteobacteria	Desulfuromonadales	GR-WP33-58	uncultured delta proteobacterium	uncultured delta proteobacterium	0	0	0	0	0	0	0	0	0	0	0	0	0	0	0	0	0	0	0	0	0	0	2	0
OTU_2415	Bacteria	Proteobacteria	Deltaproteobacteria	Myxococcales	Nannocystaceae	Unclassified	Unclassified	0	0	0	0	0	0	0	0	0	0	0	0	0	0	0	0	0	0	0	0	0	0	6	0
OTU_2417	Bacteria	Proteobacteria	Deltaproteobacteria	Sh765B-TzT-29	Unclassified	Unclassified	Unclassified	0	0	0	0	0	0	0	0	0	0	0	1	0	0	0	0	0	0	0	0	0	0	0	5
OTU_2422	Bacteria	Proteobacteria	Deltaproteobacteria	Bdellovibrionales	Bdellovibrionaceae	OM27 clade	uncultured delta proteobacterium	0	0	0	0	0	0	0	0	0	0	0	0	0	0	0	0	0	0	0	0	0	0	0	1
OTU_2423	Bacteria	Proteobacteria	Deltaproteobacteria	Sh765B-TzT-29	Unclassified	Unclassified	Unclassified	0	0	0	0	0	0	0	0	0	0	0	0	0	0	0	0	0	0	0	0	0	0	0	2
OTU_2429	Bacteria	Proteobacteria	Deltaproteobacteria	Oligoflexales	Oligoflexaceae	uncultured bacterium	uncultured bacterium	0	0	6	0	0	0	0	0	0	0	0	0	0	0	2	0	0	0	0	0	0	0	0	0
OTU_2431	Bacteria	Proteobacteria	Deltaproteobacteria	Sh765B-TzT-29	Unclassified	Unclassified	Unclassified	0	0	0	0	0	0	0	0	0	0	0	0	0	0	0	0	0	0	0	0	0	0	1	0
OTU_2435	Bacteria	Proteobacteria	Deltaproteobacteria	Sh765B-TzT-29	uncultured bacterium	uncultured bacterium	uncultured bacterium	0	0	0	0	0	0	0	3	0	0	0	0	0	1	0	0	0	0	0	3	0	0	0	0
OTU_2448	Bacteria	Proteobacteria	Deltaproteobacteria	Unclassified	Unclassified	Unclassified	Unclassified	0	0	0	0	0	0	1	2	0	0	0	0	0	0	0	0	0	0	0	0	0	0	0	0
OTU_2456	Bacteria	Proteobacteria	Deltaproteobacteria	SAR324 clade(Marine group B)	uncultured delta proteobacterium HF0200_14D13	uncultured delta proteobacterium HF0200_14D13	uncultured delta proteobacterium HF0200_14D13	2	23	3	1	1	0	0	6	6	0	0	0	0	3	4	0	0	0	0	11	1	0	0	0
OTU_2462	Bacteria	Proteobacteria	Deltaproteobacteria	Sh765B-TzT-29	uncultured bacterium AD264-E4	uncultured bacterium AD264-E4	uncultured bacterium AD264-E4	1	0	0	0	0	0	1	0	0	0	0	0	8	1	0	0	0	0	0	0	0	0	0	0
OTU_2469	Bacteria	Proteobacteria	Deltaproteobacteria	Bdellovibrionales	Bdellovibrionaceae	OM27 clade	uncultured delta proteobacterium	0	2	0	0	0	0	0	0	2	0	0	0	0	1	0	0	0	0	0	0	0	0	0	0
OTU_2472	Bacteria	Proteobacteria	Deltaproteobacteria	Desulfuromonadales	GR-WP33-58	Unclassified	Unclassified	0	0	0	1	0	0	0	0	5	0	0	0	0	0	0	0	0	0	0	0	0	0	0	0
OTU_2475	Bacteria	Proteobacteria	Deltaproteobacteria	Myxococcales	Unclassified	Unclassified	Unclassified	0	0	0	0	0	0	0	0	7	0	0	0	0	0	0	0	0	0	0	0	0	0	0	0
OTU_2488	Bacteria	Proteobacteria	Deltaproteobacteria	Desulfuromonadales	GR-WP33-58	uncultured bacterium	uncultured bacterium	0	0	1	0	0	3	0	0	0	0	0	0	0	0	0	0	0	0	0	0	0	0	0	0
OTU_2504	Bacteria	Proteobacteria	Deltaproteobacteria	Desulfobacterales	Nitrospinaceae	Nitrospina	Unclassified	0	1	7	0	0	0	0	0	5	0	0	0	0	3	2	0	0	0	0	0	1	0	0	1
OTU_2508	Bacteria	Proteobacteria	Deltaproteobacteria	Bdellovibrionales	Bdellovibrionaceae	OM27 clade	uncultured bacterium	0	0	0	0	0	0	0	0	4	0	0	0	0	0	0	0	0	3	0	3	5	0	1	0
OTU_2510	Bacteria	Proteobacteria	Deltaproteobacteria	SAR324 clade(Marine group B)	uncultured SAR324 cluster bacterium	uncultured SAR324 cluster bacterium	uncultured SAR324 cluster bacterium	0	0	0	0	0	0	0	0	0	0	0	0	0	0	0	0	0	4	0	0	0	0	0	0
OTU_2514	Bacteria	Proteobacteria	Deltaproteobacteria	Desulfuromonadales	GR-WP33-58	uncultured delta proteobacterium	uncultured delta proteobacterium	0	2	1	0	0	0	0	0	0	0	0	0	0	0	0	0	0	0	0	0	9	0	0	0
OTU_2530	Bacteria	Proteobacteria	Deltaproteobacteria	Oligoflexales	Oligoflexaceae	uncultured delta proteobacterium	uncultured delta proteobacterium	0	0	0	0	0	1	0	0	0	0	0	0	0	0	0	0	0	0	0	0	0	0	0	0
OTU_2531	Bacteria	Proteobacteria	Deltaproteobacteria	Unclassified	Unclassified	Unclassified	Unclassified	0	0	0	0	0	0	0	0	0	0	0	0	0	0	1	0	0	0	0	0	0	0	0	0
OTU_2534	Bacteria	Proteobacteria	Deltaproteobacteria	Myxococcales	Unclassified	Unclassified	Unclassified	0	4	0	0	0	0	0	0	0	0	0	0	0	0	0	0	0	0	0	0	0	0	0	0
OTU_2542	Bacteria	Proteobacteria	Deltaproteobacteria	Myxococcales	Eel-36e1D6	Unclassified	Unclassified	0	0	0	0	0	0	0	0	0	0	0	0	0	0	0	0	0	1	0	0	0	0	2	0
OTU_2544	Bacteria	Proteobacteria	Deltaproteobacteria	SAR324 clade(Marine group B)	uncultured delta proteobacterium HF0200_39N20	uncultured delta proteobacterium HF0200_39N20	uncultured delta proteobacterium HF0200_39N20	0	3	0	0	0	0	0	0	0	0	0	0	0	0	0	0	0	0	0	0	0	0	0	0
OTU_2554	Bacteria	Proteobacteria	Deltaproteobacteria	Desulfuromonadales	GR-WP33-58	uncultured delta proteobacterium	uncultured delta proteobacterium	0	0	0	0	0	0	0	0	0	0	0	0	0	0	0	0	0	0	8	0	0	0	0	1
OTU_2556	Bacteria	Proteobacteria	Deltaproteobacteria	Desulfuromonadales	GR-WP33-58	Unclassified	Unclassified	0	0	0	0	0	0	0	0	0	0	0	0	0	1	0	0	0	0	5	0	0	0	0	0
OTU_2557	Bacteria	Proteobacteria	Deltaproteobacteria	Myxococcales	27F-1492R	uncultured bacterium	uncultured bacterium	0	0	0	0	0	0	0	0	0	0	0	0	0	0	0	3	1	1	0	0	0	0	0	0
OTU_2558	Bacteria	Proteobacteria	Deltaproteobacteria	Sh765B-TzT-29	uncultured bacterium	uncultured bacterium	uncultured bacterium	0	0	0	0	1	4	0	0	2	2	0	11	0	0	1	0	0	2	0	0	1	0	1	16
OTU_2563	Bacteria	Proteobacteria	Deltaproteobacteria	Oligoflexales	uncultured delta proteobacterium	uncultured delta proteobacterium	uncultured delta proteobacterium	0	0	0	0	0	0	0	0	0	0	0	0	0	0	0	0	0	2	0	0	0	0	0	0
OTU_2567	Bacteria	Proteobacteria	Deltaproteobacteria	Oligoflexales	Oligoflexaceae	uncultured bacterium	uncultured bacterium	4	0	0	0	0	0	0	0	0	0	0	0	0	0	0	0	0	0	0	0	0	0	0	0
OTU_2569	Bacteria	Proteobacteria	Deltaproteobacteria	Oligoflexales	Oligoflexaceae	uncultured bacterium	uncultured bacterium	0	1	0	0	0	0	0	0	0	0	0	0	0	0	0	0	1	3	0	0	0	0	0	0
OTU_2598	Bacteria	Proteobacteria	Deltaproteobacteria	SAR324 clade(Marine group B)	Unclassified	Unclassified	Unclassified	0	2	0	0	0	0	0	0	0	0	0	0	0	0	0	0	0	0	0	0	0	0	0	0
OTU_2614	Bacteria	Proteobacteria	Deltaproteobacteria	Bdellovibrionales	Bacteriovoracaceae	Peredibacter	Unclassified	0	0	0	0	0	0	0	0	2	0	0	0	0	0	0	0	0	0	0	0	0	0	0	0
OTU_2616	Bacteria	Proteobacteria	Deltaproteobacteria	Sh765B-TzT-29	uncultured bacterium	uncultured bacterium	uncultured bacterium	0	3	0	0	0	0	0	37	0	0	0	0	0	0	0	0	0	0	13	45	0	0	0	0
OTU_2630	Bacteria	Proteobacteria	Deltaproteobacteria	Desulfobacterales	Nitrospinaceae	Nitrospina	uncultured bacterium	1	6	0	0	0	0	0	0	0	0	0	0	0	1	0	0	0	0	0	0	0	0	0	0
OTU_2633	Bacteria	Proteobacteria	Deltaproteobacteria	SAR324 clade(Marine group B)	uncultured delta proteobacterium HF0200_39N20	uncultured delta proteobacterium HF0200_39N20	uncultured delta proteobacterium HF0200_39N20	0	1	0	0	0	0	0	0	0	0	0	0	0	0	0	0	0	0	0	0	0	0	0	0
OTU_2638	Bacteria	Proteobacteria	Deltaproteobacteria	Bdellovibrionales	Bdellovibrionaceae	OM27 clade	uncultured bacterium	0	0	0	0	0	0	0	2	1	0	0	0	0	0	0	0	0	0	0	0	0	0	0	0
OTU_2639	Bacteria	Proteobacteria	Deltaproteobacteria	Desulfurellales	Desulfurellaceae	uncultured	uncultured delta proteobacterium	0	0	0	0	0	0	0	2	0	0	0	0	0	0	0	0	0	0	0	0	0	0	0	0
OTU_2640	Bacteria	Proteobacteria	Deltaproteobacteria	Unclassified	Unclassified	Unclassified	Unclassified	0	0	0	0	0	0	0	2	0	0	0	0	0	0	0	0	0	0	0	3	0	0	0	0
OTU_2643	Bacteria	Proteobacteria	Deltaproteobacteria	GR-WP33-30	uncultured delta proteobacterium	uncultured delta proteobacterium	uncultured delta proteobacterium	0	0	0	0	0	0	0	4	0	0	0	0	0	0	0	0	0	0	0	0	0	0	0	0
OTU_2645	Bacteria	Proteobacteria	Deltaproteobacteria	SAR324 clade(Marine group B)	uncultured SAR324 cluster bacterium	uncultured SAR324 cluster bacterium	uncultured SAR324 cluster bacterium	0	0	1	0	0	0	0	0	0	0	0	0	0	0	0	0	0	0	0	0	0	0	0	0
OTU_2647	Bacteria	Proteobacteria	Deltaproteobacteria	Desulfuromonadales	GR-WP33-58	Unclassified	Unclassified	0	0	2	0	0	0	0	0	0	0	0	0	0	0	0	0	0	0	0	0	2	0	0	0
OTU_2653	Bacteria	Proteobacteria	Deltaproteobacteria	SAR324 clade(Marine group B)	uncultured deep-sea bacterium	uncultured deep-sea bacterium	uncultured deep-sea bacterium	0	1	0	0	0	0	0	0	0	0	0	0	0	0	1	0	0	0	0	0	2	0	0	0
OTU_2657	Bacteria	Proteobacteria	Deltaproteobacteria	Desulfuromonadales	GR-WP33-58	uncultured bacterium	uncultured bacterium	0	0	0	0	0	0	0	0	0	0	0	0	0	0	0	0	0	0	0	0	9	0	0	0
OTU_2668	Bacteria	Proteobacteria	Deltaproteobacteria	Bdellovibrionales	Bdellovibrionaceae	OM27 clade	Unclassified	0	0	0	0	0	0	0	0	2	0	0	0	0	0	0	0	0	0	0	0	0	0	0	0
OTU_2670	Bacteria	Proteobacteria	Deltaproteobacteria	Sh765B-TzT-29	uncultured bacterium	uncultured bacterium	uncultured bacterium	0	0	0	0	0	1	0	0	0	0	0	1	0	0	0	0	0	0	0	0	0	0	0	2
OTU_2681	Bacteria	Proteobacteria	Deltaproteobacteria	Bdellovibrionales	Bdellovibrionaceae	OM27 clade	uncultured bacterium	0	0	0	0	0	1	0	0	0	1	0	0	0	1	0	0	0	1	0	0	0	0	0	3
OTU_2692	Bacteria	Proteobacteria	Deltaproteobacteria	GR-WP33-30	uncultured Desulfuromonas sp.	uncultured Desulfuromonas sp.	uncultured Desulfuromonas sp.	0	0	0	0	0	0	0	0	0	0	0	0	0	0	0	0	0	0	0	0	0	0	0	3
OTU_2693	Bacteria	Proteobacteria	Deltaproteobacteria	Unclassified	Unclassified	Unclassified	Unclassified	0	0	1	0	0	0	0	0	0	0	0	0	0	0	0	0	0	0	0	0	0	0	3	0
OTU_2703	Bacteria	Proteobacteria	Deltaproteobacteria	Sh765B-TzT-29	Unclassified	Unclassified	Unclassified	0	0	0	0	0	0	0	1	6	0	0	0	0	0	0	0	0	0	0	0	3	0	0	0
OTU_2704	Bacteria	Proteobacteria	Deltaproteobacteria	Desulfuromonadales	Unclassified	Unclassified	Unclassified	0	0	0	0	0	0	0	0	0	0	0	0	0	0	0	0	0	0	0	2	2	0	0	0
OTU_2713	Bacteria	Proteobacteria	Deltaproteobacteria	Desulfuromonadales	GR-WP33-58	uncultured bacterium	uncultured bacterium	0	2	0	0	0	0	0	0	0	0	0	0	0	0	0	0	0	0	0	0	4	0	0	0
OTU_2720	Bacteria	Proteobacteria	Deltaproteobacteria	GR-WP33-30	uncultured delta proteobacterium	uncultured delta proteobacterium	uncultured delta proteobacterium	0	2	0	0	0	0	0	0	0	0	0	0	0	0	0	0	0	0	0	4	0	0	0	0
OTU_2743	Bacteria	Proteobacteria	Deltaproteobacteria	SAR324 clade(Marine group B)	uncultured SAR324 cluster bacterium	uncultured SAR324 cluster bacterium	uncultured SAR324 cluster bacterium	0	0	0	0	0	0	0	0	0	0	0	0	0	0	0	0	0	0	0	1	0	0	0	0
OTU_2744	Bacteria	Proteobacteria	Deltaproteobacteria	SAR324 clade(Marine group B)	uncultured SAR324 cluster bacterium	uncultured SAR324 cluster bacterium	uncultured SAR324 cluster bacterium	0	0	1	0	0	1	0	0	1	0	0	0	0	0	6	0	1	0	0	1	0	0	1	0
OTU_2745	Bacteria	Proteobacteria	Deltaproteobacteria	Sh765B-TzT-29	Unclassified	Unclassified	Unclassified	0	0	0	0	0	0	0	0	0	0	0	0	0	0	0	0	0	0	0	1	0	0	0	0
OTU_2747	Bacteria	Proteobacteria	Deltaproteobacteria	Bdellovibrionales	Bacteriovoracaceae	uncultured	uncultured delta proteobacterium	0	0	1	0	0	0	0	0	0	0	0	0	0	2	3	0	0	0	0	0	2	0	0	0
OTU_2764	Bacteria	Proteobacteria	Deltaproteobacteria	Sh765B-TzT-29	uncultured bacterium	uncultured bacterium	uncultured bacterium	0	3	4	0	0	0	0	3	13	0	0	0	0	1	9	0	0	0	0	23	8	0	2	0
OTU_2768	Bacteria	Proteobacteria	Deltaproteobacteria	Desulfuromonadales	GR-WP33-58	uncultured marine bacterium	uncultured marine bacterium	0	0	0	0	0	0	0	0	0	0	0	0	0	0	0	0	0	0	4	0	0	0	0	0
OTU_2771	Bacteria	Proteobacteria	Deltaproteobacteria	Bdellovibrionales	Bdellovibrionaceae	OM27 clade	Unclassified	0	0	0	0	0	0	0	0	0	0	0	0	0	0	0	0	0	0	0	1	0	0	0	0
OTU_2777	Bacteria	Proteobacteria	Deltaproteobacteria	Oligoflexales	Oligoflexaceae	marine metagenome	marine metagenome	0	0	1	0	0	0	0	0	0	0	0	0	0	0	0	0	0	0	0	0	0	0	0	0
OTU_2784	Bacteria	Proteobacteria	Deltaproteobacteria	Sh765B-TzT-29	uncultured bacterium	uncultured bacterium	uncultured bacterium	0	1	0	0	0	0	0	0	0	0	0	0	0	1	0	0	0	0	0	0	0	0	0	0
OTU_2789	Bacteria	Proteobacteria	Deltaproteobacteria	Bdellovibrionales	Bacteriovoracaceae	uncultured	uncultured bacterium	5	0	0	0	0	0	0	0	0	0	0	0	0	0	0	0	0	0	0	0	0	0	0	0
OTU_2794	Bacteria	Proteobacteria	Deltaproteobacteria	Sh765B-TzT-29	uncultured deep-sea bacterium	uncultured deep-sea bacterium	uncultured deep-sea bacterium	0	0	0	0	0	0	0	0	0	0	0	0	0	0	0	0	0	0	0	0	0	0	4	0
OTU_2795	Bacteria	Proteobacteria	Deltaproteobacteria	Sh765B-TzT-29	uncultured prokaryote	uncultured prokaryote	uncultured prokaryote	0	0	0	0	0	0	0	0	0	0	0	0	0	0	0	0	0	0	0	0	1	0	0	0
OTU_2802	Bacteria	Proteobacteria	Deltaproteobacteria	Desulfuromonadales	GR-WP33-58	Unclassified	Unclassified	0	1	0	0	0	0	0	1	0	0	0	0	0	0	0	0	0	0	0	2	0	0	0	0
OTU_2805	Bacteria	Proteobacteria	Deltaproteobacteria	Myxococcales	P3OB-42	uncultured bacterium	uncultured bacterium	0	0	0	0	0	0	0	0	0	0	0	0	0	1	0	0	0	1	0	3	0	0	0	0
OTU_2814	Bacteria	Proteobacteria	Deltaproteobacteria	Unclassified	Unclassified	Unclassified	Unclassified	0	0	0	0	0	0	0	0	0	0	0	0	0	0	0	0	0	0	0	0	4	0	0	0
OTU_2815	Bacteria	Proteobacteria	Deltaproteobacteria	SAR324 clade(Marine group B)	uncultured SAR324 cluster bacterium	uncultured SAR324 cluster bacterium	uncultured SAR324 cluster bacterium	0	0	1	0	0	0	0	1	3	0	0	0	0	2	5	0	0	0	0	0	0	0	0	1
OTU_2844	Bacteria	Proteobacteria	Deltaproteobacteria	Desulfuromonadales	GR-WP33-58	unidentified marine bacterioplankton	unidentified marine bacterioplankton	0	2	0	0	0	0	0	0	0	0	0	0	0	0	0	0	0	0	2	0	0	0	0	0
OTU_2848	Bacteria	Proteobacteria	Deltaproteobacteria	Unclassified	Unclassified	Unclassified	Unclassified	0	1	0	0	0	0	0	0	0	0	0	0	0	0	0	0	0	0	0	0	0	0	0	0
OTU_2851	Bacteria	Proteobacteria	Deltaproteobacteria	Bdellovibrionales	Bdellovibrionaceae	OM27 clade	uncultured bacterium	0	0	0	0	0	0	0	0	0	0	0	0	0	1	2	0	0	0	0	0	0	0	0	0
OTU_2852	Bacteria	Proteobacteria	Deltaproteobacteria	SAR324 clade(Marine group B)	uncultured marine bacterium	uncultured marine bacterium	uncultured marine bacterium	0	0	0	0	0	0	0	0	0	0	0	0	0	0	5	0	0	0	0	0	0	0	0	0
OTU_2853	Bacteria	Proteobacteria	Deltaproteobacteria	SAR324 clade(Marine group B)	uncultured SAR324 cluster bacterium	uncultured SAR324 cluster bacterium	uncultured SAR324 cluster bacterium	0	0	6	0	0	0	0	0	5	0	0	0	0	0	12	0	0	1	0	0	0	0	0	0
OTU_2866	Bacteria	Proteobacteria	Deltaproteobacteria	Bdellovibrionales	Bdellovibrionaceae	OM27 clade	uncultured delta proteobacterium	0	0	3	0	0	1	0	0	0	0	0	0	0	0	2	0	1	0	0	0	0	0	0	0
OTU_2867	Bacteria	Proteobacteria	Deltaproteobacteria	Bdellovibrionales	Bacteriovoracaceae	Halobacteriovorax	Bacteriovorax marinus SJ	0	0	0	0	0	2	0	0	0	0	0	0	0	0	0	0	0	0	0	0	0	0	0	0
OTU_2869	Bacteria	Proteobacteria	Deltaproteobacteria	Unclassified	Unclassified	Unclassified	Unclassified	0	0	0	0	0	0	0	0	0	0	0	0	0	1	0	0	0	0	0	0	0	0	0	0
OTU_2880	Bacteria	Proteobacteria	Deltaproteobacteria	Myxococcales	Blfdi19	uncultured deep-sea bacterium	uncultured deep-sea bacterium	0	0	0	0	0	0	0	0	0	0	0	0	0	0	0	0	0	0	0	0	0	0	0	6
OTU_2889	Bacteria	Proteobacteria	Deltaproteobacteria	Desulfuromonadales	GR-WP33-58	uncultured delta proteobacterium DeepAnt-1F12	uncultured delta proteobacterium DeepAnt-1F12	0	0	0	0	0	0	0	0	0	0	0	0	0	0	0	0	0	0	0	0	0	0	0	2
OTU_2892	Bacteria	Proteobacteria	Deltaproteobacteria	Sh765B-TzT-29	uncultured bacterium	uncultured bacterium	uncultured bacterium	0	0	0	0	0	0	0	1	0	0	0	0	0	0	0	0	0	0	0	4	0	0	0	0
OTU_2897	Bacteria	Proteobacteria	Deltaproteobacteria	Sh765B-TzT-29	uncultured bacterium	uncultured bacterium	uncultured bacterium	0	0	0	0	0	0	0	0	0	0	0	0	0	0	0	0	0	0	0	0	3	0	0	0
OTU_2909	Bacteria	Proteobacteria	Deltaproteobacteria	Myxococcales	Haliangiaceae	Haliangium	uncultured deep-sea bacterium	0	0	1	0	0	0	0	0	0	0	0	0	0	0	0	0	0	0	0	0	0	0	0	9
OTU_2916	Bacteria	Proteobacteria	Deltaproteobacteria	Desulfobacterales	Nitrospinaceae	Nitrospina	uncultured bacterium	0	0	0	0	0	1	0	0	0	0	0	0	0	0	0	0	0	0	0	0	0	0	0	0
OTU_2918	Bacteria	Proteobacteria	Deltaproteobacteria	Desulfuromonadales	GR-WP33-58	Unclassified	Unclassified	0	0	0	0	0	0	0	0	0	0	0	0	0	0	0	0	1	0	0	0	11	0	5	1
OTU_2936	Bacteria	Proteobacteria	Deltaproteobacteria	SAR324 clade(Marine group B)	uncultured marine microorganism	uncultured marine microorganism	uncultured marine microorganism	0	0	0	0	0	0	0	0	0	0	0	0	0	0	0	0	0	0	0	1	0	0	0	0
OTU_2941	Bacteria	Proteobacteria	Deltaproteobacteria	Desulfuromonadales	GR-WP33-58	uncultured delta proteobacterium DeepAnt-1F12	uncultured delta proteobacterium DeepAnt-1F12	0	0	0	0	0	0	0	0	0	0	0	0	0	0	0	0	0	0	5	0	0	0	0	1
OTU_2943	Bacteria	Proteobacteria	Deltaproteobacteria	Desulfuromonadales	GR-WP33-58	Unclassified	Unclassified	0	0	0	0	0	0	0	1	0	0	0	0	0	0	0	0	0	0	0	3	0	0	0	0
OTU_2947	Bacteria	Proteobacteria	Deltaproteobacteria	Myxococcales	Nannocystaceae	uncultured	uncultured Enhygromyxa sp.	0	0	0	0	0	0	0	0	0	0	0	0	0	0	0	0	0	0	0	2	0	0	0	0
OTU_295	Bacteria	Proteobacteria	Deltaproteobacteria	Sh765B-TzT-29	uncultured delta proteobacterium	uncultured delta proteobacterium	uncultured delta proteobacterium	0	0	6	0	0	3	0	0	61	5	4	0	0	0	12	0	0	0	0	5	67	0	0	1
OTU_2952	Bacteria	Proteobacteria	Deltaproteobacteria	Desulfuromonadales	GR-WP33-58	uncultured Geobacteraceae bacterium	uncultured Geobacteraceae bacterium	0	0	0	0	0	0	0	0	0	0	0	0	0	0	0	2	0	0	0	0	0	0	1	9
OTU_2959	Bacteria	Proteobacteria	Deltaproteobacteria	Desulfuromonadales	GR-WP33-58	uncultured bacterium	uncultured bacterium	0	0	0	0	0	0	0	0	1	0	0	0	0	0	0	0	0	0	0	0	2	0	0	0
OTU_2970	Bacteria	Proteobacteria	Deltaproteobacteria	GR-WP33-30	uncultured marine bacterium	uncultured marine bacterium	uncultured marine bacterium	0	0	0	0	0	1	0	0	0	0	0	0	0	0	0	0	0	0	0	0	0	0	0	0
OTU_2974	Bacteria	Proteobacteria	Deltaproteobacteria	Bdellovibrionales	Bdellovibrionaceae	OM27 clade	uncultured bacterium	0	0	0	0	0	0	0	1	0	0	0	0	0	0	1	0	0	0	0	0	2	0	0	0
OTU_2982	Bacteria	Proteobacteria	Deltaproteobacteria	Myxococcales	Sandaracinaceae	uncultured	Unclassified	0	0	0	0	0	0	0	4	0	0	0	0	0	0	0	0	0	0	0	0	0	0	0	0
OTU_2989	Bacteria	Proteobacteria	Deltaproteobacteria	GR-WP33-30	Unclassified	Unclassified	Unclassified	0	3	2	0	2	0	0	0	2	0	0	0	0	0	3	4	0	0	0	0	0	0	0	0
OTU_2993	Bacteria	Proteobacteria	Deltaproteobacteria	Oligoflexales	Oligoflexaceae	uncultured bacterium	uncultured bacterium	0	0	1	0	0	0	0	0	2	0	0	0	0	0	0	0	0	0	0	0	0	0	0	0
OTU_301	Bacteria	Proteobacteria	Deltaproteobacteria	Sh765B-TzT-29	uncultured bacterium	uncultured bacterium	uncultured bacterium	0	0	6	1	0	7	0	0	4	0	0	0	0	0	5	3	2	22	0	0	4	0	8	13
OTU_3014	Bacteria	Proteobacteria	Deltaproteobacteria	Bdellovibrionales	Bacteriovoracaceae	Unclassified	Unclassified	0	0	0	0	0	1	0	0	0	0	0	0	0	0	0	0	0	0	0	0	0	0	0	0
OTU_3024	Bacteria	Proteobacteria	Deltaproteobacteria	Myxococcales	Sandaracinaceae	uncultured	uncultured organism	0	0	0	1	1	0	0	0	0	0	0	0	0	0	0	0	0	0	0	0	0	0	0	0
OTU_3029	Bacteria	Proteobacteria	Deltaproteobacteria	Myxococcales	P3OB-42	uncultured delta proteobacterium	uncultured delta proteobacterium	0	1	0	0	0	0	0	0	0	0	0	0	0	0	0	0	0	0	0	0	0	0	0	0
OTU_3041	Bacteria	Proteobacteria	Deltaproteobacteria	Bdellovibrionales	Bacteriovoracaceae	Halobacteriovorax	uncultured bacterium	0	0	0	0	0	7	0	0	0	0	0	0	0	0	0	0	0	0	0	0	0	0	0	0
OTU_3052	Bacteria	Proteobacteria	Deltaproteobacteria	Desulfobacterales	Nitrospinaceae	Nitrospina	uncultured Nitrospina sp.	0	0	1	0	0	0	0	0	0	0	0	0	0	0	0	0	0	0	0	0	0	0	0	0
OTU_3073	Bacteria	Proteobacteria	Deltaproteobacteria	Unclassified	Unclassified	Unclassified	Unclassified	0	0	0	0	0	0	0	0	0	0	0	0	0	0	0	0	0	0	0	0	0	0	0	1
OTU_3078	Bacteria	Proteobacteria	Deltaproteobacteria	Oligoflexales	Oligoflexaceae	Unclassified	Unclassified	1	0	0	0	0	0	0	0	0	0	0	0	0	0	0	0	0	0	0	0	0	0	0	0
OTU_3084	Bacteria	Proteobacteria	Deltaproteobacteria	Desulfuromonadales	GR-WP33-58	uncultured Geobacteraceae bacterium	uncultured Geobacteraceae bacterium	0	3	0	0	0	0	0	0	0	0	0	0	0	0	1	0	0	0	0	0	3	0	0	0
OTU_3085	Bacteria	Proteobacteria	Deltaproteobacteria	GR-WP33-30	uncultured delta proteobacterium	uncultured delta proteobacterium	uncultured delta proteobacterium	0	1	0	0	0	0	0	0	0	0	0	0	0	0	0	0	0	1	0	0	0	0	0	0
OTU_3086	Bacteria	Proteobacteria	Deltaproteobacteria	SAR324 clade(Marine group B)	uncultured delta proteobacterium HF0200_39N20	uncultured delta proteobacterium HF0200_39N20	uncultured delta proteobacterium HF0200_39N20	0	49	0	0	0	0	0	0	0	0	0	0	0	38	0	0	0	0	0	0	0	0	0	0
OTU_3095	Bacteria	Proteobacteria	Deltaproteobacteria	Bdellovibrionales	Bdellovibrionaceae	OM27 clade	uncultured marine microorganism	0	0	0	0	0	0	0	0	0	0	0	0	0	0	0	0	0	0	0	0	0	0	0	2
OTU_3101	Bacteria	Proteobacteria	Deltaproteobacteria	Unclassified	Unclassified	Unclassified	Unclassified	1	0	0	0	0	0	0	0	0	0	0	0	0	0	0	0	0	0	0	0	0	0	0	0
OTU_3114	Bacteria	Proteobacteria	Deltaproteobacteria	Myxococcales	P3OB-42	Unclassified	Unclassified	0	1	0	0	0	0	0	0	0	0	0	0	0	0	0	0	0	0	0	0	0	0	0	0
[truncated: 1,598 more rows]
