# Supplementary material for: Characterization of particle-associated and free-living bacterial and archaeal communities along the water columns of the South China Sea
Source: Copernicus journal article supplement (doi:10.5194/bg-2020-115), 2020-04-14
Supplement: Supplementary file 3 [file 03 Supplementary_Table S2.xlsx]

## Sheet: OTU_table_Archaea
OTUId	G3F50	G3F200	G3F1000	G3F2000	G3F3000	G3F4000	G3P50	G3P1000	G3P200	G3P2000	G3P4000	J5F50	J5F200	J5F1000	J5F2000	J5F3000	J5F4000	J5P50	J5P200	J5P1000	J5P2000	J5P3000
OTU_979	2105	131	35	2	25	37	1076	217	0	2	82	2139	186	23	0	3	2	393	0	6	1	0
OTU_138	748	15	25	3	11	16	548	222	0	0	0	866	29	9	0	2	4	0	0	0	0	0
OTU_21	381	0	2	0	13	0	331	40	0	0	0	194	2	0	0	0	0	0	0	65	0	0
OTU_8	81	43	1	2	1	15	1138	0	255	103	17	850	21	0	0	0	0	1739	110	0	3	120
OTU_69	140	0	0	0	5	3	28	26	0	0	0	168	8	0	0	0	1	0	0	52	0	0
OTU_87	128	52	16	3	0	3	19	89	0	0	0	49	41	22	0	0	0	0	2	58	0	0
OTU_2	741	12	2	1	3	2	481	10	0	0	0	278	20	2	0	1	0	0	0	77	0	0
OTU_14	1024	14	12	0	9	7	334	134	0	0	0	885	24	6	0	0	5	9	0	1	0	0
OTU_76	694	43	1	0	2	8	280	67	0	0	0	666	21	1	0	1	0	94	0	0	0	0
OTU_382	340	114	12	35	137	174	300	97	0	73	65	253	100	8	0	32	67	0	0	15	93	0
OTU_868	370	0	0	0	2	2	221	0	0	0	0	149	8	2	0	0	10	0	0	58	0	0
OTU_100	464	114	195	32	38	46	274	852	0	0	0	126	87	113	0	14	31	0	1	145	0	0
OTU_35	118	0	0	0	0	2	94	0	0	0	0	98	0	0	0	0	0	0	0	0	0	0
OTU_4	462	0	3	0	1	6	313	98	69	1	47	444	9	0	0	0	2	1188	3	334	0	0
OTU_641	56	711	47	16	43	50	37	36	242	21	431	169	828	39	16	5	63	301	429	79	147	0
OTU_7	273	1916	1160	211	152	154	113	345	454	170	763	177	1823	155	16	39	373	78	218	1645	1344	0
OTU_795	163	85	0	2	3	11	172	1	0	114	1	357	20	0	0	0	1	0	0	1	2	0
OTU_288	68	0	0	0	1	0	77	4	0	0	0	17	0	0	0	0	0	0	0	4	0	0
OTU_10	868	8	13	0	0	1	489	51	0	0	0	304	10	8	0	0	0	0	0	2	0	0
OTU_63	76	0	1	0	0	1	13	20	0	0	0	39	10	0	0	0	0	0	0	0	0	0
OTU_496	166	0	0	0	0	1	56	8	0	0	0	101	4	0	0	0	0	0	0	0	0	0
OTU_1136	30	0	0	0	2	0	23	2	0	0	0	13	0	0	0	0	0	0	0	16	0	0
OTU_983	68	4	3	0	0	0	22	2	0	0	0	11	3	1	0	0	0	0	0	7	0	0
OTU_318	1	0	0	0	0	0	0	0	0	0	0	0	0	0	0	0	0	0	0	0	0	0
OTU_200	46	0	0	0	0	0	20	0	0	0	0	16	0	0	0	0	0	0	0	0	0	0
OTU_6	60	0	0	0	0	0	20	0	0	0	14	1	0	0	0	0	0	1325	0	0	0	0
OTU_452	21	0	1	0	0	2	2	2	0	0	0	25	1	0	0	0	0	0	0	0	0	0
OTU_1068	8	0	0	0	0	1	7	0	0	0	0	8	0	0	0	0	0	0	0	9	0	0
OTU_49	15	387	1283	2982	2618	1577	3	564	918	2571	726	8	415	488	37	877	527	3	1326	130	1521	2893
OTU_141	94	0	0	0	1	0	15	6	0	0	0	90	1	0	0	0	0	0	0	0	0	0
OTU_530	7	0	0	0	0	0	2	1	0	0	0	8	0	0	0	0	1	1	0	0	0	0
OTU_220	54	811	109	67	99	82	56	65	688	120	927	66	733	20	3	8	49	114	499	710	850	1
OTU_1071	64	0	0	0	0	0	20	0	0	0	0	33	0	0	0	0	0	0	0	0	0	0
OTU_50	51	1	2	2	1	2	22	12	0	0	12	50	0	1	0	1	0	0	0	1	1	0
OTU_902	107	0	0	0	0	0	41	0	0	0	0	38	0	0	0	0	1	0	0	0	0	0
OTU_805	6	24	1	1	0	0	3	0	296	93	18	1	8	0	0	0	0	0	254	0	2	4
OTU_885	1	0	0	0	0	0	0	0	0	0	0	3	0	0	0	0	0	0	0	0	0	0
OTU_675	16	326	418	59	12	30	0	156	347	517	0	5	390	139	32	22	1	0	240	6	8	0
OTU_1	17	115	319	811	409	420	4	725	36	42	1160	36	206	1031	1	151	39	0	9	258	367	0
OTU_40	34	7	5	0	0	1	20	68	0	0	0	97	9	3	0	0	0	0	0	0	0	0
OTU_536	1	6	2	3	2	0	0	2	1	4	1	0	2	1	0	0	0	0	2	0	1	0
OTU_53	8	0	0	0	0	1	3	7	0	0	0	11	0	0	0	0	0	0	0	0	0	0
OTU_198	13	0	0	0	0	0	24	0	0	0	0	7	0	0	0	0	0	0	0	0	0	0
OTU_734	3	23	1	1	0	0	0	0	117	103	1	0	19	1	0	0	0	0	83	0	1	0
OTU_1069	19	0	0	0	0	0	9	0	0	0	0	2	0	0	0	0	0	0	0	1	0	0
OTU_908	6	0	0	0	0	1	0	1	0	0	0	11	0	0	0	0	0	0	0	0	0	0
OTU_289	5	0	0	0	0	0	7	1	0	0	0	4	0	0	0	0	0	0	0	0	0	0
OTU_268	3	5	14	10	4	2	0	3	5	3	86	0	11	4	0	0	1	0	3	12	25	0
OTU_625	2	0	0	0	0	0	0	0	0	0	0	0	0	0	0	0	0	0	0	0	0	0
OTU_949	13	2	0	0	0	0	44	1	0	0	0	6	1	0	0	0	0	0	0	0	0	0
OTU_196	18	0	0	0	0	0	5	2	4	0	11	14	0	0	0	0	0	6	0	8	0	0
OTU_234	8	129	357	78	47	42	6	51	440	324	33	3	113	11	0	7	4	0	437	4	28	31
OTU_1138	3	0	0	0	0	0	4	0	0	0	0	11	0	0	0	0	0	0	0	0	0	0
OTU_996	4	0	0	0	0	0	23	0	0	0	0	1	0	0	0	0	0	0	0	0	0	0
OTU_13	4	168	519	104	95	48	1	140	74	118	5	2	174	109	0	31	23	0	117	4	21	29
OTU_370	5	0	0	0	0	0	1	0	0	0	1	1	0	0	0	0	0	12	0	4	0	0
OTU_177	2	0	0	0	0	0	1	0	0	0	0	2	0	0	0	0	0	0	0	0	0	0
OTU_85	2	0	1	0	0	83	5	55	0	0	0	10	1	0	0	0	0	0	0	0	0	0
OTU_12	2	76	20	1	1	1	0	0	166	178	0	1	76	7	0	0	0	0	371	0	0	0
OTU_1111	11	0	0	0	0	0	2	2	0	0	0	11	0	0	0	0	0	0	0	0	0	0
OTU_380	7	0	0	0	0	0	9	1	0	0	0	4	0	0	0	0	0	1	0	0	0	0
OTU_924	21	8	0	0	2	4	33	0	16	25	2	170	2	0	0	0	0	88	4	0	0	0
OTU_895	2	0	0	0	0	0	0	0	0	0	0	1	0	0	0	0	0	0	0	0	0	0
OTU_3	19	4	3	62	249	420	18	12	0	5	52	49	7	9	0	96	18	0	0	8	24	0
OTU_24	3	0	3	13	51	106	1	7	0	0	25	2	0	8	104	161	391	0	0	28	241	0
OTU_569	58	167	0	0	3	1	2	14	0	0	0	208	298	9	0	0	0	2	0	0	0	0
OTU_9	8	76	155	41	85	110	24	804	0	0	0	16	85	120	7	41	32	0	2	191	0	0
OTU_31	1	9	6	5	13	21	0	211	0	0	0	0	2	5	0	3	2	0	0	0	0	0
OTU_931	5	77	177	183	122	76	0	88	46	63	32	1	102	73	0	48	33	0	46	4	11	9
OTU_631	8	1	1	0	0	1	22	0	0	0	0	8	4	0	0	0	0	0	0	0	1	0
OTU_28	3	84	18	1	0	1	0	4	54	63	44	4	87	7	0	0	0	0	66	0	1	0
OTU_951	4	0	0	0	0	0	2	0	0	0	0	3	0	0	0	0	0	0	0	0	0	0
OTU_499	1	0	0	0	0	0	13	0	2	0	0	11	0	0	0	0	0	7	0	0	0	1
OTU_458	1	1	11	3	4	3	0	3	0	4	18	0	2	21	1	1	0	0	0	11	6	0
OTU_588	1	0	0	0	5	2	0	0	0	1	5	13	1	1	0	0	1	0	0	0	2	0
OTU_894	9	1	0	0	0	0	10	0	0	0	1	19	0	0	0	0	0	1	1	0	0	0
OTU_342	5	0	0	0	0	0	0	0	0	0	0	2	0	0	0	0	0	0	0	0	0	0
OTU_46	4	156	143	48	24	30	1	139	164	181	0	2	212	95	42	15	3	0	131	1	2	2
OTU_1126	3	0	0	0	0	0	1	0	0	0	0	4	0	0	0	0	0	0	0	0	0	0
OTU_647	2	0	0	0	0	0	1	0	0	0	0	0	0	0	0	0	0	0	0	0	0	0
OTU_1042	6	0	0	0	0	0	3	0	0	0	0	1	0	0	4	0	0	0	0	1	0	0
OTU_327	1	1	0	0	0	0	5	0	0	0	0	5	0	0	0	0	0	0	0	0	0	0
OTU_804	2	0	0	0	0	0	1	0	0	0	0	1	2	0	0	0	0	0	0	12	0	0
OTU_206	4	0	0	0	0	0	0	0	0	0	0	3	0	0	0	0	0	0	0	0	0	0
OTU_941	30	0	0	0	0	0	0	0	0	0	0	6	0	0	0	0	0	0	0	0	0	0
OTU_411	1	0	0	0	0	0	0	0	0	0	0	0	0	0	0	0	0	0	0	0	0	0
OTU_1112	21	8	0	0	2	1	10	0	0	0	0	174	9	0	0	0	0	1	0	0	0	0
OTU_870	1	9	0	0	0	0	0	0	2	0	0	1	9	0	0	0	0	0	0	0	0	0
OTU_724	2	0	0	0	0	0	0	0	0	0	0	0	0	0	0	0	0	0	0	0	0	0
OTU_677	3	0	0	0	0	0	1	0	0	0	0	2	1	0	0	0	0	0	0	0	0	0
OTU_939	1	0	0	0	0	0	0	0	0	0	0	0	0	0	0	0	0	0	0	0	0	0
OTU_391	1	36	0	0	1	0	0	0	22	18	1	0	37	0	0	0	0	0	17	0	0	0
OTU_66	5	65	172	186	191	80	0	58	27	101	4	1	95	112	368	162	93	0	30	10	126	102
OTU_210	2	0	0	0	0	0	3	0	0	0	0	1	0	0	0	0	0	0	0	0	0	0
OTU_205	3	0	0	0	0	0	9	0	0	1	0	92	2	0	0	0	0	0	0	0	0	0
OTU_262	1	45	15	16	9	10	0	9	21	23	0	1	38	11	0	1	2	0	27	0	12	15
OTU_26	3	135	7	0	0	0	2	205	0	0	0	8	88	9	0	0	0	0	0	0	0	0
OTU_598	2	5	0	0	0	0	0	2	0	0	0	0	16	0	0	0	0	0	0	7	0	0
OTU_23	1	52	154	98	51	38	1	134	37	105	0	2	90	213	313	122	64	0	51	10	19	5
OTU_792	1	0	0	0	0	0	0	0	0	0	0	0	0	0	0	0	0	0	0	0	0	0
OTU_960	2	87	9	0	0	0	0	80	0	0	0	6	91	1	0	0	0	0	0	0	0	0
OTU_52	1	0	26	45	154	157	0	101	0	0	0	1	0	102	80	147	317	0	2	62	0	0
OTU_1109	2	1	0	0	0	0	17	0	1	2	0	17	2	0	1	5	0	12	3	0	0	0
OTU_783	1	0	0	0	0	0	0	0	0	0	0	0	0	0	0	0	0	0	0	0	0	0
OTU_722	1	47	55	5	2	1	4	21	21	8	0	2	53	11	0	0	0	0	34	1	0	0
OTU_227	1	6	7	41	10	7	0	18	2	5	11	0	12	27	0	2	0	0	5	0	5	1
OTU_82	1	1	0	0	2	0	0	0	1	0	1	0	1	5	54	110	169	0	1	0	1	0
OTU_555	1	1	0	0	0	0	0	0	0	0	0	0	2	0	0	0	0	0	0	0	0	0
OTU_95	3	5	0	0	0	0	0	0	0	0	0	1	13	0	0	0	0	0	0	0	0	0
OTU_782	4	0	0	0	0	0	18	0	0	0	0	7	0	0	0	0	0	0	0	0	0	0
OTU_229	2	30	0	0	0	0	0	0	0	0	0	0	16	0	0	0	0	0	0	0	0	0
OTU_25	1	0	92	52	169	225	0	137	0	0	0	0	4	36	1	56	110	0	2	360	0	0
OTU_1061	1	0	0	0	0	0	0	0	0	0	0	0	0	0	0	0	0	0	0	0	0	0
OTU_68	3	125	0	1	0	0	1	0	286	101	0	3	84	0	0	0	0	0	195	0	0	3
OTU_1013	4	155	183	29	48	90	0	886	0	0	0	4	171	83	0	27	35	0	4	558	0	0
OTU_997	1	0	0	0	0	0	0	0	0	0	0	0	0	0	0	0	0	0	0	0	0	0
OTU_132	1	4	1	23	34	7	0	0	77	0	0	0	2	1	5	7	4	0	142	0	0	0
OTU_882	1	0	0	0	0	0	0	0	0	0	0	1	0	0	0	0	0	0	0	0	0	0
OTU_861	2	0	0	0	0	0	0	0	0	0	0	0	0	0	0	0	0	0	0	0	0	0
OTU_1093	1	1	3	5	0	1	0	4	0	0	14	1	4	0	0	0	0	0	0	6	6	0
OTU_1060	2	0	0	0	0	0	0	0	0	0	0	0	0	0	0	0	0	0	0	0	0	0
OTU_238	1	0	0	0	0	0	0	0	0	0	0	1	0	0	0	0	0	0	0	0	0	0
OTU_1064	4	0	0	0	0	0	0	0	0	0	0	2	0	0	0	0	0	0	0	0	0	0
OTU_315	2	8	0	0	1	1	0	0	7	15	0	0	13	0	0	1	0	0	14	0	0	0
OTU_29	2	3	7	0	14	139	0	0	0	0	0	1	8	1	0	1	18	0	0	0	0	0
OTU_686	1	0	0	0	0	0	0	0	0	0	0	0	0	0	0	0	0	0	0	0	0	0
OTU_678	1	0	0	0	0	0	0	0	0	0	0	0	0	0	0	0	0	0	0	0	0	0
OTU_103	1	0	0	0	1	11	0	4	0	0	0	1	0	4	1	1	1	0	0	0	0	0
OTU_769	1	11	1	4	1	0	0	0	61	53	0	0	30	0	0	0	0	0	16	0	4	3
OTU_159	1	18	0	0	0	0	1	0	127	88	0	1	20	0	0	0	0	0	58	0	1	0
OTU_976	1	0	0	0	0	0	0	0	0	0	0	1	0	0	0	0	0	0	0	0	0	0
OTU_60	2	26	12	17	5	3	0	20	0	0	0	0	11	17	2	0	1	0	0	69	0	0
OTU_81	1	25	0	0	0	0	0	0	30	0	0	0	12	0	0	0	0	0	22	0	0	0
OTU_1010	1	1	0	4	1	2	2	3	0	0	1	8	1	0	0	0	0	0	0	0	1	0
OTU_197	1	0	0	0	0	0	0	0	0	0	0	0	0	0	0	0	0	0	0	0	0	0
OTU_264	1	0	0	0	0	0	3	0	0	0	0	2	1	0	0	0	0	0	0	0	0	0
OTU_400	1	47	0	0	0	0	0	0	43	27	0	0	38	0	0	0	0	0	22	0	0	0
OTU_1021	1	0	0	0	0	0	0	0	0	0	0	0	0	0	0	0	0	0	0	0	0	0
OTU_321	1	41	0	0	0	0	0	31	0	0	0	0	15	1	0	0	0	0	0	0	0	0
OTU_488	1	0	0	0	0	0	0	0	0	0	0	0	0	0	0	0	0	0	0	0	0	0
OTU_818	2	9	43	129	146	109	0	24	9	80	103	1	6	8	0	26	42	0	6	10	88	168
OTU_630	1	0	0	0	0	0	0	0	0	0	0	0	0	0	0	0	0	0	0	0	0	0
OTU_37	1	3	11	6	28	43	0	338	0	0	0	0	0	18	0	9	25	0	0	102	0	0
OTU_1082	1	0	0	0	0	0	0	0	0	0	0	0	0	0	0	0	0	0	0	0	0	0
OTU_516	1	0	0	0	0	0	1	0	0	0	0	0	0	0	0	0	0	0	0	0	0	0
OTU_316	2	0	0	0	0	0	0	0	0	0	0	0	0	0	0	0	0	0	0	0	0	0
OTU_808	1	0	0	0	0	0	0	0	0	0	0	0	0	0	0	0	0	0	0	0	0	0
OTU_824	1	4	2	2	1	2	0	2	1	4	0	0	4	3	0	0	0	0	3	0	3	1
OTU_891	1	0	0	0	0	0	0	0	0	0	0	0	0	0	0	0	0	0	0	0	0	0
OTU_394	2	1	1	0	0	0	26	0	1	0	2	22	0	0	0	0	0	13	0	0	0	2
OTU_345	1	4	1	0	0	0	1	0	13	6	0	0	0	0	0	0	0	0	7	0	0	0
OTU_44	1	2	1	0	0	0	0	261	0	0	0	0	12	4	0	0	1	0	0	0	0	0
OTU_552	1	5	0	0	0	0	0	4	0	0	0	0	2	0	0	0	0	0	0	0	0	0
OTU_154	1	0	0	0	0	0	0	0	0	0	0	1	0	0	8	0	12	0	0	0	0	0
OTU_714	1	0	0	0	0	0	0	0	0	0	0	0	1	0	0	0	0	0	0	0	0	0
OTU_78	1	28	1	0	0	0	4	0	40	17	0	4	15	0	0	0	0	0	34	0	0	0
OTU_982	1	0	0	0	0	0	0	0	0	0	0	0	0	0	0	0	0	0	0	0	0	0
OTU_1098	1	0	4	13	9	17	0	6	3	14	29	0	1	2	0	4	5	0	2	0	14	57
OTU_860	1	0	0	0	0	0	0	0	0	0	0	0	0	0	0	0	0	0	0	0	0	0
OTU_652	1	0	0	0	0	0	0	0	0	0	0	0	0	0	0	0	0	1	0	0	0	1
OTU_857	1	0	0	0	0	0	12	0	0	0	0	9	0	0	0	0	0	1	0	0	0	0
OTU_759	1	0	0	0	0	1	0	0	0	0	0	0	2	0	0	0	0	0	0	0	0	0
OTU_293	1	0	0	0	0	0	2	0	0	0	0	0	0	0	0	0	0	0	0	0	0	0
OTU_793	1	0	0	0	0	0	0	0	0	0	0	0	0	0	0	0	0	0	0	0	0	0
OTU_886	1	0	0	0	0	0	0	0	0	0	0	0	0	0	0	0	0	0	0	0	0	0
OTU_451	1	0	0	0	0	0	0	0	0	0	0	0	2	0	0	0	0	0	1	0	0	0
OTU_386	1	0	0	0	0	0	0	0	0	0	0	4	0	0	0	0	0	0	0	0	0	0
OTU_373	0	2	2	2	1	1	0	1	1	1	0	0	4	2	0	0	0	1	4	0	0	3
OTU_152	0	24	87	68	72	80	0	385	0	0	0	1	19	61	9	18	47	0	1	108	0	0
OTU_129	0	43	0	0	0	0	0	0	49	47	0	2	26	0	0	0	0	0	88	0	2	5
OTU_461	0	24	18	10	15	2	0	8	11	30	9	1	37	2	0	0	0	0	21	0	1	5
OTU_348	0	5	11	11	4	1	0	6	4	5	19	1	6	5	0	2	0	0	9	1	5	4
OTU_1103	0	2	1	0	0	0	0	0	0	0	0	0	0	0	0	0	0	0	0	0	0	0
OTU_84	0	32	1	1	2	0	0	1	110	30	1	0	13	0	0	0	0	0	35	0	0	0
OTU_1018	0	4	5	4	1	2	0	3	0	2	3	0	1	0	0	0	0	0	0	0	1	3
OTU_191	0	16	50	22	22	18	0	17	10	33	53	2	22	12	1	7	2	0	28	6	13	24
OTU_36	0	52	28	0	2	4	0	45	111	80	0	0	24	12	0	0	0	0	38	20	1	0
OTU_27	0	35	3	0	12	140	0	31	0	0	0	0	30	2	0	0	2	0	0	24	0	0
OTU_11	0	12	1	0	1	0	0	0	435	7	24	0	5	0	0	1	4	0	58	0	3	10
OTU_253	0	27	1	17	115	63	0	3	4	3	103	0	25	8	0	26	75	0	2	1	15	0
OTU_201	0	1	5	3	3	0	0	0	0	2	0	0	0	0	0	0	0	0	1	0	0	1
OTU_357	0	22	154	533	628	371	0	66	67	704	339	0	20	62	3	187	139	3	62	25	746	2143
OTU_17	0	16	25	19	73	26	0	40	79	119	0	3	11	33	0	23	23	0	0	0	11	0
OTU_748	0	1	0	0	0	0	0	0	0	0	0	0	1	0	0	0	0	0	0	0	0	0
OTU_175	0	5	12	2	0	2	0	1	8	6	0	0	10	1	0	0	0	0	12	0	0	0
OTU_137	0	38	13	2	1	3	0	10	52	36	0	0	45	1	0	0	1	0	44	0	1	17
OTU_41	0	4	3	2	3	3	0	0	103	0	0	0	4	7	0	0	2	0	0	0	2	0
OTU_749	0	7	0	0	0	0	0	10	0	0	0	0	6	4	0	0	0	0	0	19	0	0
OTU_1014	0	11	0	0	3	3	0	0	0	0	1	2	7	0	0	2	0	0	0	1	0	0
OTU_1099	0	21	78	209	173	111	0	29	5	71	324	0	18	43	57	73	44	0	15	6	77	203
OTU_202	0	26	7	2	2	1	0	3	17	4	6	3	43	5	0	0	0	0	3	2	2	0
OTU_74	0	12	22	4	1	1	0	19	7	1	0	0	14	11	0	0	0	0	6	0	0	0
OTU_16	0	3	13	0	0	0	2	344	0	0	0	1	10	6	0	0	0	0	0	71	0	0
OTU_683	0	10	28	5	11	0	0	2	105	25	54	0	13	16	14	4	9	0	1	0	39	244
OTU_326	0	10	22	20	7	9	0	4	4	12	12	0	7	9	5	1	1	0	13	0	6	4
OTU_314	0	2	0	6	4	7	0	2	0	4	6	0	2	0	8	2	1	0	0	0	3	4
OTU_190	0	6	0	0	0	0	3	2	0	0	0	0	12	1	0	0	0	0	0	0	0	0
OTU_214	0	11	29	13	10	13	0	7	21	23	9	1	11	4	0	1	1	0	16	1	6	0
OTU_312	0	48	26	31	0	11	0	5	291	175	0	0	49	16	0	0	0	0	283	1	1	0
OTU_682	0	2	3	1	0	0	0	0	2	1	0	0	0	0	0	0	0	0	4	0	0	0
OTU_911	0	4	3	2	2	0	0	0	10	5	3	0	7	1	0	0	0	0	12	0	2	1
OTU_237	0	9	3	0	0	0	0	0	18	18	0	0	17	0	0	0	0	0	12	0	0	0
OTU_1001	0	1	3	3	0	2	0	1	1	0	4	0	3	3	0	0	0	0	0	4	3	0
OTU_1124	0	8	0	2	0	0	0	1	31	26	1	0	9	0	0	0	0	0	28	0	0	0
OTU_30	0	28	11	3	0	0	0	104	0	0	0	2	19	14	0	0	1	0	0	0	0	0
OTU_966	0	1	0	0	0	0	0	0	0	0	0	0	0	0	0	0	0	0	1	0	0	0
OTU_320	0	2	7	18	16	10	0	2	0	6	9	0	2	2	0	3	8	0	2	0	4	11
OTU_346	0	1	1	0	0	0	0	0	2	1	0	0	0	0	0	0	0	0	1	0	0	0
OTU_98	0	3	9	0	0	3	0	7	1	0	0	0	1	50	151	46	28	0	0	0	0	0
OTU_335	0	1	1	0	0	0	0	0	132	13	4	0	1	0	0	0	0	0	11	0	5	11
OTU_923	0	8	0	0	0	0	0	0	3	2	0	0	1	0	0	0	0	0	3	0	0	0
OTU_19	0	34	306	695	807	548	0	179	0	167	175	0	27	156	374	400	394	0	0	27	318	600
OTU_1121	0	2	4	2	0	0	0	3	4	3	1	0	0	1	0	0	0	0	2	0	0	2
OTU_697	0	19	39	13	14	8	0	14	18	14	0	0	32	6	0	1	1	0	30	2	10	6
OTU_281	0	31	26	2	0	3	0	10	7	1	0	0	30	9	0	2	0	0	9	0	0	0
OTU_122	0	2	1	0	16	108	0	29	10	0	13	0	0	1	0	4	21	4	0	3	1	17
OTU_77	0	18	0	0	0	0	2	0	17	0	0	0	18	0	0	0	0	0	0	0	0	0
OTU_403	0	1	0	0	0	0	0	0	0	0	0	2	0	0	0	0	0	0	0	0	0	0
OTU_680	0	14	0	0	0	0	0	0	26	12	0	7	13	0	0	0	0	1	13	0	0	0
OTU_500	0	20	0	0	0	0	0	0	29	28	0	0	23	0	0	0	0	0	19	0	0	0
OTU_80	0	7	0	0	5	1	0	0	92	0	0	0	6	2	0	1	2	2	0	0	1	0
OTU_1023	0	3	4	1	2	1	0	1	2	1	1	1	2	1	0	0	0	0	4	0	4	2
OTU_279	0	1	1	0	0	0	0	0	0	0	0	0	1	0	0	0	0	0	0	0	0	0
OTU_133	0	3	6	0	2	2	0	2	0	0	22	0	1	634	679	276	184	0	0	7	8	0
OTU_355	0	1	0	0	0	0	0	0	5	1	0	0	1	0	0	0	0	0	0	0	0	0
OTU_421	0	2	0	0	1	0	0	0	1	0	0	0	6	0	0	0	0	0	0	0	0	0
OTU_266	0	5	0	0	5	9	0	38	33	6	0	10	6	0	0	0	2	67	0	5	1	13
OTU_1139	0	15	0	0	1	0	0	0	29	0	0	1	15	0	0	0	0	0	3	0	0	0
OTU_937	0	15	0	0	0	0	0	0	118	13	0	0	19	0	0	0	0	0	60	0	1	20
OTU_280	0	1	0	0	0	0	0	0	0	0	0	0	1	0	0	0	0	0	0	0	0	0
OTU_303	0	2	0	0	0	0	0	3	0	0	0	0	1	14	0	0	0	0	0	0	0	0
OTU_1101	0	1	0	0	0	0	0	0	0	0	0	0	0	0	0	0	0	0	0	0	0	0
OTU_800	0	1	0	0	0	0	0	0	0	0	0	0	0	0	0	0	0	0	0	0	0	0
OTU_649	0	5	29	41	44	40	0	12	0	7	231	1	3	18	0	11	9	0	0	15	209	0
OTU_971	0	1	0	0	0	0	0	0	3	0	0	0	0	0	0	0	0	0	1	0	0	0
OTU_466	0	1	0	0	0	0	0	0	2	0	0	0	1	0	0	0	0	0	0	1	0	0
OTU_224	0	3	21	1	1	4	0	40	2	1	0	0	6	10	0	0	0	0	4	22	0	0
OTU_323	0	2	0	0	0	0	0	0	8	1	0	0	0	0	0	0	0	0	1	0	0	0
OTU_62	0	6	5	0	1	0	0	0	0	0	0	0	6	11	0	0	0	0	58	158	0	0
OTU_483	0	1	0	2	7	3	0	1	0	0	2	1	2	0	1	2	1	0	0	0	1	2
OTU_72	0	9	0	0	0	0	0	0	4	1	0	0	7	0	0	0	0	0	0	0	0	0
OTU_368	0	4	1	0	0	0	0	0	67	33	0	0	9	0	0	0	0	0	32	0	0	0
OTU_559	0	3	8	8	1	3	0	8	0	1	0	0	10	3	0	0	0	0	1	0	0	0
OTU_946	0	2	10	5	3	5	0	4	1	2	48	0	3	3	0	0	0	0	0	9	14	0
OTU_817	0	1	0	0	0	0	0	0	0	0	0	0	0	0	0	0	0	0	0	0	0	0
OTU_653	0	2	3	2	0	2	0	18	0	0	0	0	9	6	0	0	0	0	0	6	0	0
OTU_919	0	2	0	0	0	0	0	0	0	1	0	0	0	0	0	1	0	0	0	0	0	0
OTU_580	0	5	1	0	0	0	0	24	0	0	0	0	4	1	0	0	0	0	0	0	0	0
OTU_34	0	1	1	8	11	0	0	0	0	0	0	0	0	1	0	0	5	0	0	113	0	0
OTU_173	0	1	0	0	0	1	0	0	0	0	0	9	2	0	0	0	0	0	0	0	0	0
OTU_866	0	1	1	0	0	0	2	0	0	0	1	0	2	0	0	0	0	0	0	0	0	0
OTU_554	0	1	0	0	0	0	0	0	1	0	0	0	0	0	0	0	0	0	2	0	0	0
OTU_479	0	1	2	0	0	0	0	0	0	0	2	0	0	1	0	1	0	0	0	1	0	0
OTU_1072	0	2	0	0	1	0	0	0	2	0	0	0	0	0	0	0	0	0	0	0	0	0
OTU_775	0	4	0	0	0	1	0	0	0	0	0	0	4	0	0	0	0	0	0	0	0	0
OTU_107	0	2	0	0	0	0	0	11	0	0	0	0	2	0	0	0	0	0	0	0	0	0
OTU_797	0	2	0	0	0	0	0	0	5	17	0	0	8	0	0	0	0	0	10	0	0	0
OTU_246	0	2	0	0	0	0	0	0	5	1	0	0	1	0	2	0	0	0	2	0	0	0
OTU_392	0	7	22	0	2	0	0	4	5	1	0	0	8	6	0	0	0	0	12	1	0	0
OTU_1007	0	1	0	0	0	0	0	0	0	0	0	0	1	1	0	0	0	0	0	0	0	0
OTU_513	0	2	0	0	0	0	0	0	1	2	0	0	2	0	0	0	0	0	4	0	0	0
OTU_32	0	3	7	50	19	12	0	23	0	41	0	0	1	7	10	7	6	0	100	229	0	0
OTU_232	0	3	0	0	0	0	2	0	42	16	0	1	9	0	0	0	0	0	28	0	0	11
OTU_1100	0	1	1	1	0	0	0	0	0	0	0	0	0	0	0	0	0	0	0	0	0	0
OTU_503	0	3	0	0	0	0	0	0	0	2	0	0	0	0	0	0	0	0	0	0	0	0
OTU_553	0	1	0	0	0	0	0	0	0	0	0	0	0	0	0	0	0	0	0	0	0	0
OTU_632	0	1	0	0	0	0	0	0	0	0	0	0	0	0	0	0	0	0	0	0	0	0
OTU_243	0	12	71	48	196	190	3	722	0	0	0	0	15	76	0	58	78	0	1	112	0	0
OTU_519	0	14	0	0	0	0	0	0	0	0	0	0	19	0	0	0	0	1	1	0	0	0
OTU_90	0	4	5	23	15	4	0	16	0	0	0	0	0	3	3	3	9	0	0	63	0	0
OTU_578	0	2	0	0	0	0	0	0	1	1	0	0	1	0	0	0	0	0	0	0	0	0
OTU_398	0	1	0	0	0	0	0	0	0	0	0	0	0	9	0	0	0	0	0	0	0	0
OTU_492	0	1	0	0	0	0	0	0	0	0	0	0	0	0	0	0	0	0	0	0	0	0
OTU_110	0	5	4	0	0	0	0	0	0	0	0	0	2	4	0	0	4	0	0	0	0	0
OTU_106	0	3	2	24	75	71	0	0	0	0	6	0	0	16	39	32	73	0	0	0	1	0
OTU_148	0	3	0	0	0	2	0	0	4	9	0	0	3	0	0	0	0	0	6	0	0	0
OTU_307	0	5	0	0	0	0	0	0	8	12	0	0	2	0	0	0	0	0	8	0	0	0
OTU_413	0	2	0	0	0	0	0	0	0	0	0	0	0	0	0	0	0	0	0	0	0	0
OTU_616	0	4	0	0	0	0	0	0	0	0	0	1	1	0	0	0	0	0	0	0	0	0
OTU_1125	0	2	2	0	0	0	0	0	1	8	0	0	3	0	0	0	0	0	7	0	0	0
OTU_99	0	5	12	4	0	1	0	0	0	0	0	0	4	5	0	0	0	0	0	0	0	0
OTU_715	0	1	0	0	0	0	0	0	4	8	0	0	6	0	0	0	0	0	3	0	0	0
OTU_128	0	3	0	0	0	0	0	0	0	0	0	0	1	0	0	0	0	0	0	0	0	0
OTU_502	0	1	0	1	0	0	0	0	1	2	0	0	0	0	0	0	0	0	0	0	0	0
OTU_1085	0	4	0	0	0	0	0	0	6	2	5	0	2	2	0	0	0	0	0	0	0	2
OTU_254	0	2	2	0	0	0	0	0	0	0	0	0	2	23	11	0	0	0	1	0	0	0
OTU_582	0	1	0	1	0	0	0	0	0	0	0	0	0	20	1	0	0	0	0	0	0	0
OTU_424	0	1	0	0	0	0	0	0	0	2	0	0	0	0	0	0	0	0	0	0	0	0
OTU_157	0	4	0	0	0	0	1	0	0	0	0	6	5	0	0	0	0	0	0	0	0	0
OTU_5	0	1	3	5	1	2	0	0	0	4	24	0	0	239	2246	1058	805	0	0	0	1	12
OTU_1025	0	1	0	0	0	0	0	0	0	0	0	0	0	0	0	0	0	0	0	0	0	0
OTU_754	0	3	3	98	249	156	0	0	2	0	10	2	9	4	0	59	5	0	1	0	3	0
OTU_491	0	2	1	1	0	3	0	1	0	2	1	0	5	0	0	1	0	0	1	0	2	1
OTU_589	0	1	0	0	0	0	0	0	0	0	0	0	2	0	0	0	0	0	0	0	0	0
OTU_540	0	1	0	0	0	0	0	0	0	0	0	0	0	0	0	0	0	0	0	0	0	0
OTU_186	0	2	2	3	2	1	0	27	0	0	0	0	0	17	17	6	5	0	0	0	0	0
OTU_317	0	1	0	0	0	0	0	0	0	0	0	0	0	0	0	0	0	0	0	0	0	0
OTU_998	0	4	1	4	2	1	0	0	3	0	3	1	5	0	0	1	4	2	2	0	9	0
OTU_203	0	1	0	0	0	0	0	0	0	0	0	0	0	0	0	0	0	0	0	0	0	0
OTU_412	0	1	0	0	0	0	0	0	0	0	0	0	0	0	0	0	0	0	0	0	0	0
OTU_105	0	1	1	0	2	0	0	0	0	0	0	0	0	7	0	1	1	0	0	0	0	0
OTU_757	0	1	5	13	6	3	0	3	1	1	0	1	4	16	0	4	1	0	5	0	2	1
OTU_571	0	1	0	0	0	0	0	0	0	0	0	0	0	0	0	0	0	0	0	0	0	0
OTU_236	0	1	0	0	0	0	0	0	0	0	0	0	1	0	0	0	0	0	0	0	0	0
OTU_752	0	2	9	2	1	1	0	1	1	2	0	0	2	1	0	0	1	0	1	0	0	0
OTU_160	0	2	0	0	0	0	0	0	0	0	0	0	2	0	0	0	0	0	0	0	0	0
OTU_418	0	1	1	0	0	1	0	0	0	0	0	0	0	0	0	0	0	0	0	0	0	0
OTU_577	0	1	18	1	1	1	0	1	0	2	2	0	1	0	0	0	0	0	0	3	3	0
OTU_527	0	2	0	0	0	0	0	0	0	0	0	0	0	0	0	0	0	0	0	0	0	0
OTU_65	0	1	3	1	0	2	0	0	13	5	67	0	0	14	48	29	28	0	1	0	15	53
OTU_707	0	1	1	0	0	0	0	0	2	1	0	0	1	3	0	0	0	0	1	0	1	0
OTU_305	0	2	0	0	0	0	0	0	0	0	0	0	0	0	0	0	0	0	0	0	0	0
OTU_1058	0	2	0	0	0	0	0	0	0	0	0	0	0	0	0	0	0	0	0	0	0	0
OTU_532	0	2	0	0	0	0	0	0	0	0	0	0	5	0	0	0	0	0	0	0	0	0
OTU_56	0	1	0	4	10	15	0	0	0	0	0	0	2	0	0	5	3	0	0	0	0	0
OTU_212	0	1	0	0	0	0	0	1	1	4	0	0	1	0	0	0	0	0	2	0	0	0
OTU_794	0	1	0	0	0	0	0	0	0	0	0	0	0	0	0	0	0	0	0	0	0	0
OTU_597	0	1	0	0	0	0	0	0	0	0	0	0	2	0	0	0	0	0	0	0	0	0
OTU_703	0	1	1	0	0	0	0	1	0	0	0	0	0	0	0	1	0	0	0	0	0	0
OTU_575	0	1	4	0	2	0	0	74	0	0	0	0	2	0	0	0	0	0	0	1	0	0
OTU_311	0	1	0	0	0	0	0	0	0	0	0	3	0	0	0	0	1	0	0	1	0	0
OTU_183	0	1	0	0	0	0	0	0	0	0	0	1	2	0	0	0	0	0	0	0	1	0
OTU_292	0	1	2	0	0	1	0	5	0	0	0	0	1	5	2	1	0	0	0	1	0	0
OTU_1005	0	1	16	8	12	32	0	141	0	0	0	0	2	9	0	3	1	0	0	16	0	0
OTU_199	0	1	15	3	11	32	0	16	0	0	0	0	1	4	0	3	8	0	0	10	0	0
OTU_864	0	1	0	0	0	0	0	0	0	0	0	0	0	0	0	0	0	0	0	0	0	0
OTU_732	0	1	0	0	0	0	0	0	0	0	0	0	0	0	0	0	0	0	0	0	0	0
OTU_504	0	1	1	0	0	0	0	0	1	2	0	0	2	0	0	0	0	0	10	0	0	0
OTU_761	0	1	0	2	14	20	0	4	0	0	0	0	0	0	2	5	11	0	0	1	0	0
OTU_467	0	1	0	0	0	0	0	0	1	0	0	0	0	0	0	0	0	0	0	0	0	0
OTU_986	0	1	0	0	0	0	0	0	0	0	0	0	0	0	0	0	0	0	0	0	0	0
OTU_490	0	1	0	0	0	0	0	0	0	0	0	0	0	0	0	0	0	0	0	0	0	0
OTU_812	0	1	3	1	0	4	0	2	0	1	1	0	1	0	0	0	0	0	1	0	0	1
OTU_505	0	1	0	0	0	0	1	0	2	0	0	0	0	0	0	0	0	0	1	0	0	1
OTU_1133	0	1	0	0	0	0	0	0	0	1	2	0	1	0	0	0	0	0	0	0	0	0
OTU_961	0	1	3	0	0	0	0	1	0	2	0	1	0	1	0	0	0	0	0	0	0	0
OTU_570	0	1	5	22	12	7	0	7	0	5	0	0	3	2	0	8	7	0	2	2	8	5
OTU_762	0	1	0	0	3	0	0	0	0	0	0	0	0	0	0	0	0	0	0	0	0	0
OTU_745	0	1	1	0	0	0	0	9	0	0	0	0	2	19	3	3	0	0	0	5	0	0
OTU_339	0	0	7	23	23	17	0	2	0	33	4	0	0	4	0	3	5	0	0	2	76	70
OTU_182	0	0	2	0	0	0	0	0	0	0	0	0	2	0	0	0	0	0	1	0	0	0
OTU_362	0	0	6	0	0	0	0	13	0	0	0	0	0	30	0	0	0	0	0	0	0	0
OTU_18	0	0	21	19	50	94	0	58	0	0	0	0	0	28	8	18	20	0	6	296	0	0
OTU_523	0	0	38	1	0	0	0	0	0	0	5	0	0	88	4	13	26	0	1	13	4	0
OTU_913	0	0	10	0	0	0	0	11	0	0	0	0	0	6	0	0	0	0	2	88	0	0
OTU_988	0	0	8	17	8	12	0	1	0	0	0	0	0	9	3	0	7	0	0	4	0	0
OTU_1019	0	0	4	0	0	0	0	0	0	0	2	0	0	0	0	0	0	0	0	2	1	0
OTU_331	0	0	1	5	5	1	0	0	0	0	0	0	0	0	2	0	2	0	0	0	0	9
OTU_125	0	0	12	5	29	10	0	0	0	0	0	0	0	10	3	8	11	0	0	0	0	0
OTU_659	0	0	1	0	0	0	0	0	0	0	0	0	0	0	0	0	0	0	0	0	0	2
OTU_446	0	0	2	0	0	0	0	11	0	0	0	0	0	0	0	0	0	0	0	0	0	0
OTU_440	0	0	1	2	4	2	0	0	5	0	77	0	0	1	0	1	5	0	0	0	10	29
OTU_685	0	0	10	44	38	25	0	0	0	8	2	0	2	3	0	9	12	0	0	3	20	24
OTU_729	0	0	4	0	1	0	0	13	0	0	0	0	6	1	0	0	1	0	0	14	0	0
OTU_832	0	0	1	20	24	7	0	0	2	1	60	0	2	16	0	14	2	0	0	0	19	79
OTU_1062	0	0	2	0	4	1	0	9	0	0	0	0	0	2	0	0	1	0	0	2	0	0
OTU_955	0	0	1	0	0	0	0	1	0	0	0	0	0	0	0	0	0	0	0	0	0	0
OTU_1083	0	0	1	0	0	0	0	0	0	0	0	0	0	0	0	0	0	0	0	0	0	0
OTU_634	0	0	4	0	0	1	0	11	0	0	0	1	0	52	51	19	17	0	0	6	0	0
OTU_1032	0	0	1	0	0	0	0	0	0	0	0	0	1	1	0	0	0	0	0	0	0	0
OTU_1065	0	0	1	0	0	1	0	0	0	0	4	2	1	3	0	1	0	0	0	3	0	0
OTU_195	0	0	5	11	14	14	0	2	2	5	42	0	0	1	0	2	4	0	1	0	7	14
OTU_827	0	0	2	2	2	1	0	1	1	0	5	0	0	0	0	0	0	0	0	9	10	0
OTU_934	0	0	2	2	0	0	0	1	0	0	10	0	0	2	0	0	0	0	1	0	0	0
OTU_146	0	0	2	0	0	1	0	0	0	0	0	1	2	22	2	1	1	0	0	0	0	0
OTU_47	0	0	9	14	63	115	0	0	0	0	0	0	0	1	0	20	39	0	0	0	0	0
OTU_813	0	0	2	4	5	2	0	0	0	0	13	0	2	3	0	2	1	0	0	0	0	2
OTU_774	0	0	1	2	2	1	0	1	0	1	2	0	0	6	30	9	10	0	0	1	0	1
OTU_506	0	0	1	0	1	8	0	0	0	0	0	0	0	0	3	1	7	0	0	0	0	0
OTU_771	0	0	2	0	0	0	0	0	1	2	0	0	0	8	2	0	0	0	1	0	0	0
OTU_401	0	0	1	0	2	1	0	0	0	0	1	0	0	0	0	2	0	0	0	0	1	1
OTU_1076	0	0	4	1	5	10	0	1	0	0	10	0	0	1	1	5	151	0	0	0	7	0
OTU_1115	0	0	2	3	0	1	0	0	1	0	0	0	0	1	0	1	0	0	1	1	1	0
OTU_720	0	0	2	51	73	40	0	6	0	0	0	0	0	6	0	34	2	0	0	0	0	0
OTU_111	0	0	3	0	0	0	0	0	0	0	0	0	0	10	0	0	0	0	0	0	0	0
OTU_247	0	0	3	2	1	0	0	0	0	0	0	0	0	0	7	1	0	0	0	0	0	0
OTU_594	0	0	1	0	0	0	0	0	0	0	0	0	0	0	0	0	0	0	0	0	0	0
OTU_1056	0	0	1	1	0	0	0	1	0	0	0	0	0	0	0	0	0	0	1	0	0	0
OTU_807	0	0	2	1	1	2	0	1	0	2	4	0	0	3	1	0	1	0	0	7	4	0
OTU_876	0	0	1	8	6	9	0	17	0	0	0	0	0	10	1	9	11	0	0	4	0	0
OTU_416	0	0	3	6	2	4	0	1	0	0	0	0	0	0	0	2	1	0	0	1	0	0
OTU_1004	0	0	11	0	5	3	0	22	0	0	0	0	2	1	0	2	2	0	1	4	0	0
OTU_841	0	0	1	0	0	0	0	0	0	0	0	0	0	0	0	0	0	0	0	0	0	0
OTU_604	0	0	2	0	0	0	0	4	0	0	0	0	1	1	0	0	0	0	0	1	0	0
OTU_67	0	0	4	0	26	4	0	0	0	0	0	0	0	5	0	5	4	0	1	77	0	0
OTU_1134	0	0	1	0	0	0	0	0	0	0	0	0	0	0	0	0	0	0	0	0	0	0
OTU_1122	0	0	1	0	0	0	0	0	0	1	0	0	0	0	0	0	0	0	0	0	0	0
OTU_136	0	0	3	20	24	26	0	4	0	0	0	0	0	12	65	28	33	0	0	0	0	0
OTU_1127	0	0	1	0	0	0	0	0	0	0	0	0	0	0	0	0	0	0	0	0	0	0
OTU_1097	0	0	1	5	0	4	0	0	0	1	5	0	0	0	0	1	0	0	0	0	1	7
OTU_932	0	0	1	0	0	0	0	0	6	2	0	0	1	0	0	0	0	0	3	0	1	1
OTU_343	0	0	1	0	0	0	0	0	0	0	0	0	0	0	0	0	0	0	0	0	0	0
OTU_1128	0	0	1	0	0	0	0	0	0	0	0	0	0	0	0	0	0	0	0	0	0	0
OTU_1016	0	0	2	0	1	0	0	0	1	0	0	0	0	0	0	0	0	0	0	0	0	0
OTU_716	0	0	3	1	0	0	0	0	0	1	1	0	0	0	0	0	1	0	0	0	0	1
OTU_187	0	0	1	0	2	0	0	1	0	0	0	0	0	8	3	2	0	0	0	0	0	0
OTU_537	0	0	1	0	0	0	0	0	0	0	0	0	0	0	0	0	0	0	0	0	0	0
OTU_901	0	0	1	2	1	1	0	0	0	0	0	0	0	4	2	0	0	0	0	0	0	0
OTU_477	0	0	1	0	0	0	0	0	0	0	0	0	0	0	0	1	0	0	0	0	0	0
OTU_816	0	0	2	0	0	0	0	0	0	0	0	0	0	0	0	0	0	0	0	0	0	0
OTU_922	0	0	1	0	0	1	0	0	0	0	0	0	0	1	0	1	0	0	0	0	0	2
OTU_544	0	0	1	1	4	0	0	0	0	0	0	0	0	1	0	1	0	0	0	0	0	0
OTU_414	0	0	1	0	0	0	0	0	0	0	0	0	0	0	0	0	0	0	0	0	0	0
OTU_397	0	0	2	0	0	0	0	0	0	0	0	0	0	6	0	0	0	0	0	0	0	0
OTU_228	0	0	1	0	0	0	0	0	0	0	0	0	0	0	0	0	0	0	0	0	0	0
OTU_965	0	0	1	0	1	3	0	0	0	0	1	0	0	0	0	0	0	0	1	0	2	0
OTU_992	0	0	1	0	0	0	0	0	3	0	0	0	0	0	0	0	0	0	2	0	0	0
OTU_770	0	0	3	9	5	6	0	0	0	3	17	0	0	2	0	1	3	0	0	0	2	8
OTU_112	0	0	4	0	0	0	0	0	0	0	0	0	0	0	12	0	0	0	0	0	0	0
OTU_147	0	0	1	6	0	2	0	0	0	7	0	0	0	0	0	0	0	0	1	0	1	2
OTU_938	0	0	2	0	0	0	0	0	0	1	0	0	0	0	0	0	0	0	2	15	17	0
OTU_89	0	0	1	8	28	12	0	10	0	0	0	0	0	28	69	77	137	0	0	0	0	0
OTU_545	0	0	1	2	0	1	0	0	0	0	0	0	0	7	5	1	4	0	0	0	0	0
OTU_531	0	0	1	0	0	0	0	0	1	0	0	0	4	0	0	1	0	0	1	0	0	0
OTU_871	0	0	1	0	0	0	0	1	0	0	0	0	0	2	0	0	0	0	0	9	0	0
OTU_417	0	0	1	10	20	14	0	1	0	1	6	0	0	0	0	1	3	0	0	0	6	9
OTU_811	0	0	2	0	0	0	0	0	0	0	0	0	0	0	0	0	0	0	0	0	0	0
OTU_730	0	0	1	8	1	1	0	0	0	0	0	0	0	0	0	0	0	0	0	0	4	0
OTU_338	0	0	1	0	0	0	0	0	0	0	0	0	0	0	0	0	0	0	0	0	0	0
OTU_514	0	0	1	0	1	0	0	1	0	0	0	0	1	0	0	0	0	0	1	0	0	0
OTU_263	0	0	1	3	3	2	0	1	0	0	1	0	0	0	0	0	0	0	0	0	0	2
OTU_359	0	0	1	0	0	1	0	0	0	0	0	0	0	3	3	4	2	0	0	0	0	0
OTU_283	0	0	1	0	2	4	0	1	0	0	0	0	0	0	0	1	1	0	0	0	0	0
OTU_478	0	0	1	0	0	0	0	0	0	0	0	0	0	0	0	0	0	0	0	0	0	0
OTU_618	0	0	1	0	0	0	0	0	0	0	0	0	0	0	0	0	0	0	0	0	0	0
OTU_1011	0	0	1	0	0	0	0	0	0	0	0	0	0	0	0	0	0	0	0	0	0	0
OTU_839	0	0	1	0	0	0	0	0	0	0	0	0	0	0	0	0	0	0	0	0	0	0
OTU_872	0	0	1	1	0	0	0	0	0	0	0	0	0	0	0	0	0	0	0	0	0	0
OTU_619	0	0	1	0	0	0	0	0	0	0	0	0	0	0	0	0	0	0	0	0	0	0
OTU_629	0	0	1	0	0	0	0	0	0	1	1	0	0	0	0	0	0	0	0	3	6	0
OTU_539	0	0	1	5	1	5	0	0	0	0	3	0	0	0	0	0	0	0	0	0	0	4
OTU_972	0	0	1	0	0	0	0	0	0	0	0	0	0	0	0	0	0	0	0	0	0	0
OTU_79	0	0	0	9	14	41	0	0	0	0	0	0	0	4	0	10	25	0	0	5	0	0
OTU_86	0	0	0	2	0	0	0	0	0	0	392	0	0	0	0	2	0	0	0	0	0	0
OTU_121	0	0	0	2	2	0	0	0	0	0	0	0	0	100	773	444	314	0	0	0	0	1
OTU_766	0	0	0	3	7	3	0	0	0	0	1	0	0	0	0	0	0	0	0	1	2	2
OTU_59	0	0	0	12	18	12	0	0	0	0	0	0	0	0	1	13	15	0	0	0	102	0
OTU_161	0	0	0	9	3	0	0	0	0	0	0	0	0	1	0	0	0	0	0	0	0	0
OTU_987	0	0	0	1	0	0	0	0	0	0	0	0	0	0	0	0	0	0	0	0	0	0
OTU_71	0	0	0	10	14	5	0	0	0	0	0	0	0	0	0	1	3	0	1	38	0	0
OTU_718	0	0	0	3	7	55	0	11	1	0	0	3	0	0	0	1	5	0	0	0	0	0
OTU_287	0	0	0	3	0	0	0	0	0	0	0	0	0	0	0	0	0	0	0	0	0	0
OTU_713	0	0	0	1	0	1	0	0	0	2	1	0	0	0	0	0	0	0	0	0	0	1
OTU_873	0	0	0	1	0	0	0	0	0	0	0	0	0	0	0	0	0	0	0	0	0	0
OTU_948	0	0	0	2	0	6	0	0	1	2	11	2	0	1	0	0	0	0	0	2	5	0
OTU_803	0	0	0	1	0	0	0	0	1	0	0	0	0	0	0	0	1	0	8	0	0	0
OTU_415	0	0	0	2	0	0	0	0	0	0	0	0	0	0	0	0	0	0	0	0	0	0
OTU_244	0	0	0	6	6	4	0	0	0	0	0	0	0	0	28	27	10	0	0	0	13	0
OTU_395	0	0	0	2	0	1	0	0	0	0	0	0	0	0	0	1	1	0	0	0	1	0
OTU_586	0	0	0	2	3	1	0	0	0	0	0	0	0	0	0	0	1	0	0	0	0	0
OTU_1090	0	0	0	2	2	1	0	0	2	0	27	0	0	0	0	0	1	0	0	0	7	32
OTU_295	0	0	0	1	0	0	0	0	0	0	0	0	0	0	19	4	7	0	0	0	0	0
OTU_970	0	0	0	1	5	0	0	0	0	0	0	0	0	0	0	0	0	0	0	0	0	0
OTU_738	0	0	0	3	4	8	0	0	0	3	4	0	0	1	1	1	2	0	0	0	6	15
OTU_431	0	0	0	3	1	2	0	0	0	1	1	0	0	1	0	0	0	0	0	0	0	0
OTU_567	0	0	0	1	0	0	0	0	0	0	1	0	0	0	0	0	0	0	0	0	0	0
OTU_648	0	0	0	1	0	0	0	0	0	0	0	0	0	0	0	0	0	0	0	0	0	0
OTU_767	0	0	0	1	0	1	0	0	0	0	0	0	0	0	0	0	0	0	0	0	0	0
OTU_778	0	0	0	1	6	9	0	0	0	0	0	0	0	0	0	0	2	0	0	0	0	0
OTU_282	0	0	0	1	0	22	0	2	0	0	0	0	0	0	0	0	0	0	0	0	0	0
OTU_673	0	0	0	1	0	0	0	0	0	0	3	0	0	0	0	0	0	0	0	0	0	0
OTU_765	0	0	0	1	1	0	0	0	0	0	0	0	0	0	0	0	0	0	0	0	0	0
OTU_376	0	0	0	14	5	17	0	94	0	0	0	0	1	33	10	4	15	0	0	1	0	0
OTU_717	0	0	0	2	0	1	0	0	0	0	0	0	0	0	0	0	0	0	0	0	0	0
OTU_482	0	0	0	6	0	0	0	0	0	0	0	0	0	0	0	0	0	0	0	0	0	0
OTU_829	0	0	0	6	9	7	0	0	1	0	4	0	0	5	0	2	0	0	0	0	0	1
OTU_851	0	0	0	1	0	0	0	0	0	0	0	0	0	0	0	0	0	0	1	0	0	0
OTU_784	0	0	0	2	0	0	0	0	0	0	0	0	0	0	0	0	0	0	0	0	0	0
OTU_1012	0	0	0	1	0	0	0	0	0	0	0	0	0	0	0	0	0	0	0	0	0	0
OTU_434	0	0	0	2	1	0	0	0	0	0	0	0	0	0	7	2	1	0	0	0	0	0
OTU_245	0	0	0	1	0	1	0	0	0	0	0	0	1	4	3	0	2	0	0	0	0	0
OTU_108	0	0	0	5	2	0	0	0	0	0	0	0	0	0	3	10	3	0	0	0	0	0
OTU_476	0	0	0	3	3	2	0	2	0	0	0	0	0	0	0	2	1	0	0	0	0	0
OTU_429	0	0	0	1	4	3	0	0	0	0	0	0	0	15	18	52	77	0	0	4	0	0
OTU_863	0	0	0	1	0	0	0	0	0	1	0	0	0	0	0	0	0	0	0	0	0	0
OTU_753	0	0	0	1	0	0	0	1	0	0	0	0	0	0	0	0	1	0	0	0	0	0
OTU_785	0	0	0	1	0	1	0	0	0	0	0	0	0	0	0	0	0	0	0	0	0	0
OTU_340	0	0	0	1	0	0	0	0	0	0	0	0	0	0	0	0	0	0	0	0	0	0
OTU_58	0	0	0	2	0	0	0	0	0	12	0	0	0	0	0	0	0	0	68	42	0	0
OTU_92	0	0	0	1	0	0	0	4	0	0	0	0	0	74	59	36	20	0	0	1	0	0
OTU_189	0	0	0	1	2	0	0	0	0	0	1	0	0	0	0	0	0	0	0	0	0	0
OTU_456	0	0	0	1	1	6	0	0	0	0	0	0	0	0	0	2	4	0	0	0	0	0
OTU_654	0	0	0	1	0	0	0	0	0	0	0	0	0	0	0	0	0	0	0	0	0	0
OTU_657	0	0	0	1	0	0	0	0	0	0	0	0	0	0	0	2	0	0	0	0	0	0
OTU_1129	0	0	0	1	0	2	0	1	0	0	0	0	0	0	0	0	2	0	0	0	0	0
OTU_472	0	0	0	2	1	0	0	0	0	2	0	0	0	0	23	3	5	0	23	1	0	0
OTU_644	0	0	0	1	0	1	0	0	0	0	0	0	0	0	0	0	1	0	5	0	0	0
OTU_592	0	0	0	2	4	7	0	3	0	0	0	0	0	22	20	19	34	0	0	6	0	0
OTU_549	0	0	0	1	0	0	0	0	0	0	0	0	0	0	0	0	0	0	0	1	2	0
OTU_1089	0	0	0	1	0	0	0	0	0	0	0	0	0	0	0	0	1	0	0	0	0	0
OTU_1036	0	0	0	1	0	0	0	1	0	0	10	0	0	0	0	0	0	0	0	1	1	0
OTU_556	0	0	0	1	0	1	0	0	0	0	0	0	0	0	0	0	2	0	0	0	0	0
OTU_617	0	0	0	1	0	0	0	0	0	0	0	0	0	0	0	0	0	0	0	0	0	0
OTU_780	0	0	0	1	2	1	0	1	0	0	0	0	0	0	0	0	1	0	1	2	0	0
OTU_1035	0	0	0	1	0	0	0	0	0	2	0	0	0	0	0	1	0	0	2	0	0	0
OTU_284	0	0	0	1	0	2	0	0	0	0	0	0	0	0	0	0	0	0	0	0	0	1
OTU_70	0	0	0	1	13	34	0	0	0	0	0	0	0	0	2	20	37	0	0	0	0	0
OTU_341	0	0	0	1	0	0	0	0	0	0	0	0	0	0	0	0	0	0	0	0	0	0
OTU_828	0	0	0	0	1	0	0	0	0	0	0	0	0	0	0	0	0	0	0	0	0	0
OTU_54	0	0	0	0	3	154	0	0	0	0	0	0	0	0	0	2	11	0	0	0	0	0
OTU_55	0	0	0	0	13	47	0	8	0	0	0	0	1	0	0	4	8	0	0	2	0	9
OTU_964	0	0	0	0	2	0	0	1	0	0	0	0	1	0	0	0	1	0	0	0	0	0
OTU_481	0	0	0	0	4	0	0	0	0	0	0	0	0	0	0	0	0	0	0	0	0	0
OTU_671	0	0	0	0	2	0	0	0	0	0	0	0	0	2	1	1	1	0	1	0	0	0
OTU_1078	0	0	0	0	1	0	0	0	3	0	0	0	1	0	0	0	0	0	2	0	2	0
OTU_88	0	0	0	0	19	1	0	3	0	0	0	0	0	0	0	0	3	0	1	1	0	0
OTU_650	0	0	0	0	5	5	0	4	0	0	0	0	0	0	0	3	3	0	0	0	0	0
OTU_694	0	0	0	0	1	2	0	0	0	0	0	0	0	0	0	0	0	0	0	0	0	1
OTU_1130	0	0	0	0	1	0	0	0	0	0	0	0	0	0	0	0	0	0	0	0	0	0
OTU_855	0	0	0	0	1	0	0	0	0	0	0	0	0	0	0	0	0	0	0	0	0	0
OTU_441	0	0	0	0	2	0	0	1	0	1	0	0	0	0	7	0	19	0	0	0	0	0
OTU_226	0	0	0	0	3	0	0	0	0	0	2	0	1	0	0	0	0	0	0	0	1	0
OTU_248	0	0	0	0	1	0	0	0	0	0	0	0	0	49	316	108	93	0	0	0	1	0
OTU_336	0	0	0	0	1	0	0	0	0	0	0	0	2	0	0	0	0	0	0	0	0	0
OTU_286	0	0	0	0	1	0	0	0	0	0	0	0	0	0	0	0	0	0	0	0	0	0
OTU_445	0	0	0	0	1	0	0	5	0	0	0	0	0	2	0	1	0	0	0	0	0	0
OTU_968	0	0	0	0	2	0	0	0	0	0	0	0	0	0	0	0	0	0	0	0	0	0
OTU_291	0	0	0	0	1	0	0	0	0	0	0	0	0	0	0	0	0	0	0	0	0	0
OTU_170	0	0	0	0	1	0	0	0	0	0	0	0	0	0	31	5	0	0	0	1	0	0
OTU_852	0	0	0	0	1	0	0	0	0	0	0	0	0	0	0	0	0	0	0	0	0	0
OTU_155	0	0	0	0	7	6	3	24	0	0	0	33	1	0	0	1	0	0	0	0	0	0
OTU_73	0	0	0	0	8	7	0	0	0	0	0	0	0	0	0	1	1	0	0	0	0	0
OTU_114	0	0	0	0	1	2	0	0	0	0	0	0	0	0	1	4	38	0	0	0	0	0
OTU_620	0	0	0	0	3	1	0	0	0	0	0	0	0	0	0	0	0	0	0	0	0	0
OTU_548	0	0	0	0	1	0	0	0	0	0	0	0	0	0	0	0	0	0	0	0	0	0
OTU_126	0	0	0	0	1	1	0	2	0	0	0	0	0	5	7	8	15	0	0	4	0	0
OTU_814	0	0	0	0	1	0	0	0	0	0	0	0	0	0	0	0	0	0	0	0	0	0
OTU_364	0	0	0	0	1	0	0	0	0	1	0	0	0	0	0	0	0	0	0	0	0	0
OTU_719	0	0	0	0	2	11	0	0	0	0	0	0	0	0	0	0	1	0	0	0	0	0
OTU_130	0	0	0	0	1	0	0	0	0	0	0	0	0	0	0	5	6	0	0	0	0	0
OTU_408	0	0	0	0	2	1	0	0	0	0	0	0	0	0	0	1	0	0	0	0	0	0
OTU_260	0	0	0	0	1	3	0	1	0	1	1	0	0	0	0	0	0	0	0	0	1	0
OTU_973	0	0	0	0	1	0	0	0	0	0	0	0	0	1	0	1	0	0	0	0	0	0
OTU_721	0	0	0	0	1	0	0	0	0	0	0	0	0	4	6	1	1	0	0	0	0	0
OTU_75	0	0	0	0	2	5	0	0	0	0	0	0	0	0	0	9	6	0	0	0	0	0
OTU_1135	0	0	0	0	1	0	0	0	0	0	0	0	0	0	0	0	0	0	0	0	0	0
OTU_242	0	0	0	0	2	6	0	0	0	0	0	0	0	0	0	0	3	0	0	0	0	0
OTU_947	0	0	0	0	2	2	0	0	0	0	0	0	0	0	0	0	0	0	0	0	0	0
OTU_687	0	0	0	0	1	0	0	0	0	0	0	0	0	0	8	1	0	0	0	0	0	0
OTU_162	0	0	0	0	1	3	0	0	0	0	0	0	0	0	1	15	9	0	0	0	0	0
OTU_744	0	0	0	0	1	0	0	0	0	0	0	0	0	0	0	0	0	0	0	0	0	0
OTU_1131	0	0	0	0	2	1	0	3	0	1	3	0	0	0	0	2	0	0	1	0	3	4
OTU_517	0	0	0	0	1	5	0	0	0	0	0	0	0	0	0	0	1	0	0	0	0	0
OTU_957	0	0	0	0	1	0	0	0	0	0	0	0	0	0	0	0	0	0	0	0	0	0
OTU_313	0	0	0	0	1	0	0	0	0	0	0	0	0	0	0	0	0	0	0	0	1	0
OTU_884	0	0	0	0	1	2	0	0	0	1	0	0	0	0	0	0	0	0	0	0	2	2
OTU_615	0	0	0	0	1	0	0	0	0	0	0	0	0	0	0	0	0	0	0	0	0	0
OTU_1043	0	0	0	0	0	1	0	0	0	0	0	0	0	0	0	0	0	0	0	0	0	0
OTU_853	0	0	0	0	0	2	0	0	0	0	0	0	0	0	0	0	0	0	0	0	0	0
OTU_91	0	0	0	0	0	18	0	0	0	0	0	0	0	0	0	0	5	0	0	0	0	0
OTU_692	0	0	0	0	0	1	0	0	0	0	0	0	0	0	0	0	0	0	0	0	0	0
OTU_425	0	0	0	0	0	4	0	0	0	0	0	0	0	0	1	0	1	0	0	0	0	0
OTU_176	0	0	0	0	0	2	0	0	0	0	0	0	0	0	0	0	0	0	0	0	0	0
OTU_1000	0	0	0	0	0	1	0	0	0	0	0	0	0	0	0	0	0	0	0	0	0	0
OTU_954	0	0	0	0	0	1	0	0	0	1	1	1	0	0	1	0	0	0	0	0	1	0
OTU_779	0	0	0	0	0	1	0	0	0	0	0	0	0	0	0	0	0	0	0	0	0	0
OTU_290	0	0	0	0	0	1	0	0	0	0	0	0	0	0	0	0	0	0	0	0	0	0
OTU_51	0	0	0	0	0	7	0	0	0	0	0	0	0	2	16	44	45	0	0	1	0	0
OTU_389	0	0	0	0	0	1	0	0	0	0	0	0	0	0	0	0	0	0	0	0	0	0
OTU_271	0	0	0	0	0	1	0	0	0	0	0	0	0	2	9	6	23	0	0	0	0	0
OTU_390	0	0	0	0	0	1	0	0	0	0	0	0	0	0	0	0	0	0	0	0	0	0
OTU_480	0	0	0	0	0	1	0	0	1	1	0	0	0	0	0	0	0	0	2	0	0	0
OTU_820	0	0	0	0	0	1	0	0	0	0	0	0	0	0	0	0	0	0	0	0	0	0
OTU_1045	0	0	0	0	0	1	0	0	0	0	0	0	0	0	0	0	0	0	0	0	0	0
OTU_487	0	0	0	0	0	5	0	0	0	0	0	0	0	0	0	1	0	0	0	0	0	0
OTU_994	0	0	0	0	0	1	0	17	0	66	0	0	0	0	0	1	0	0	4	0	0	0
OTU_1044	0	0	0	0	0	1	0	0	0	0	0	0	0	0	0	0	0	0	0	0	0	0
OTU_579	0	0	0	0	0	2	0	0	0	0	0	0	0	0	0	0	0	0	0	0	0	0
OTU_969	0	0	0	0	0	1	0	0	0	0	0	0	0	0	0	0	1	0	0	0	0	0
OTU_475	0	0	0	0	0	1	0	0	0	0	0	0	0	0	0	0	0	0	0	0	0	0
OTU_333	0	0	0	0	0	1	0	0	0	0	0	0	0	0	0	0	0	0	0	0	0	0
OTU_819	0	0	0	0	0	2	0	0	0	0	0	0	0	0	0	0	0	0	0	0	0	0
OTU_149	0	0	0	0	0	1	0	12	0	0	0	0	3	1	0	0	1	0	0	10	0	0
OTU_608	0	0	0	0	0	2	0	0	0	0	0	0	0	0	0	0	0	0	0	0	0	0
OTU_251	0	0	0	0	0	1	0	0	1	4	0	0	0	0	0	0	0	0	0	0	2	1
OTU_270	0	0	0	0	0	1	0	0	0	0	0	0	0	2	0	0	0	0	0	0	0	0
OTU_953	0	0	0	0	0	1	0	1	0	0	0	0	0	0	0	0	0	0	0	0	0	0
OTU_705	0	0	0	0	0	1	0	0	0	0	0	0	0	0	1	1	2	0	0	0	0	0
OTU_945	0	0	0	0	0	1	0	0	0	0	0	0	0	0	0	0	0	0	0	0	0	0
OTU_208	0	0	0	0	0	1	0	0	0	0	0	0	0	0	0	0	0	0	0	0	0	0
OTU_1088	0	0	0	0	0	1	0	0	0	0	0	0	0	0	0	0	0	0	0	0	0	0
OTU_1046	0	0	0	0	0	1	0	0	0	0	0	0	0	0	0	0	0	0	0	0	0	0
OTU_285	0	0	0	0	0	1	0	0	0	0	0	0	0	0	0	0	0	0	0	0	0	0
OTU_642	0	0	0	0	0	1	0	0	0	0	0	0	0	0	0	0	1	0	0	0	0	0
OTU_693	0	0	0	0	0	1	0	0	0	0	0	0	0	0	0	0	0	0	0	0	0	0
OTU_607	0	0	0	0	0	1	0	0	0	0	0	0	0	0	0	0	0	0	1	0	0	0
OTU_1017	0	0	0	0	0	1	0	0	0	0	0	0	0	0	0	0	0	0	0	0	0	0
OTU_984	0	0	0	0	0	1	0	0	0	1	1	0	0	0	0	0	0	0	0	0	0	2
OTU_269	0	0	0	0	0	1	0	6	0	0	0	0	1	3	0	1	0	0	0	0	0	0
OTU_241	0	0	0	0	0	1	0	1	0	0	0	0	0	34	74	24	90	0	0	1	0	0
OTU_1091	0	0	0	0	0	1	0	0	0	0	0	0	0	0	0	0	0	0	0	0	0	0
OTU_591	0	0	0	0	0	1	0	0	0	0	0	0	0	34	0	0	1	0	0	0	0	0
OTU_750	0	0	0	0	0	1	0	0	0	0	1	0	0	0	0	0	0	0	0	0	0	0
OTU_144	0	0	0	0	0	0	2	0	0	0	0	0	0	0	0	0	0	0	1	0	0	0
OTU_277	0	0	0	0	0	0	13	0	0	0	0	0	0	0	0	0	0	0	0	0	0	0
OTU_94	0	0	0	0	0	0	5	0	0	0	0	6	0	0	0	0	0	0	0	0	0	0
OTU_781	0	0	0	0	0	0	1	0	0	0	0	0	0	0	0	0	0	0	0	0	0	0
OTU_764	0	0	0	0	0	0	1	0	0	0	0	0	0	0	0	0	0	0	0	0	0	0
OTU_906	0	0	0	0	0	0	1	0	0	0	0	0	0	0	0	0	0	0	0	0	0	0
OTU_330	0	0	0	0	0	0	2	0	0	0	0	0	0	0	0	0	0	0	0	0	0	0
OTU_119	0	0	0	0	0	0	4	0	0	0	0	0	0	0	0	0	0	0	0	0	0	0
OTU_587	0	0	0	0	0	0	1	0	0	0	0	0	0	0	0	0	0	0	0	0	0	0
OTU_276	0	0	0	0	0	0	3	0	0	0	0	0	0	0	0	0	0	0	0	0	0	0
OTU_921	0	0	0	0	0	0	1	0	0	0	0	0	0	0	0	0	0	0	0	0	0	0
OTU_139	0	0	0	0	0	0	1	0	0	0	0	0	0	0	0	0	0	31	3	0	0	0
OTU_1047	0	0	0	0	0	0	1	0	0	0	0	0	0	0	0	0	0	0	0	0	0	0
OTU_561	0	0	0	0	0	0	1	0	0	0	0	0	0	0	0	0	0	0	0	0	0	0
OTU_1070	0	0	0	0	0	0	4	0	1	0	0	8	0	0	0	0	0	2	0	0	0	0
OTU_463	0	0	0	0	0	0	1	0	0	0	0	0	0	0	0	0	0	0	0	0	0	0
OTU_758	0	0	0	0	0	0	1	0	0	0	0	0	0	0	0	0	0	0	0	0	0	0
OTU_560	0	0	0	0	0	0	1	0	0	0	0	0	0	0	0	0	0	0	0	0	0	0
OTU_521	0	0	0	0	0	0	2	0	0	0	0	0	0	0	0	0	0	0	0	0	0	0
OTU_760	0	0	0	0	0	0	1	0	0	0	0	0	0	0	0	0	0	0	0	0	0	0
OTU_668	0	0	0	0	0	0	2	0	0	0	0	2	0	0	0	0	0	0	0	0	0	0
OTU_821	0	0	0	0	0	0	1	0	0	0	0	1	0	0	0	0	0	0	0	0	0	0
OTU_854	0	0	0	0	0	0	1	0	0	0	0	0	0	0	0	0	0	0	0	0	0	0
OTU_207	0	0	0	0	0	0	1	0	0	0	0	0	0	0	0	0	0	0	0	0	0	0
OTU_599	0	0	0	0	0	0	1	0	0	0	0	0	0	0	0	0	0	0	0	0	0	0
OTU_104	0	0	0	0	0	0	0	42	0	0	0	0	0	0	0	0	0	0	1	33	0	0
OTU_1003	0	0	0	0	0	0	0	4	0	0	0	0	0	0	0	0	0	0	0	0	0	0
OTU_419	0	0	0	0	0	0	1	0	0	0	0	5	0	0	0	0	0	0	0	0	0	0
OTU_892	0	0	0	0	0	0	0	1	0	0	0	0	0	0	0	0	0	0	0	0	0	0
OTU_325	0	0	0	0	0	0	0	2	0	0	0	0	0	0	0	0	0	0	0	0	0	0
OTU_522	0	0	0	0	0	0	0	8	0	0	0	0	0	0	0	0	0	0	0	0	0	0
OTU_350	0	0	0	0	0	0	0	7	0	0	0	0	0	1	20	1	2	0	0	0	0	0
OTU_636	0	0	0	0	0	0	0	5	0	0	0	0	0	0	0	0	0	0	0	0	0	0
OTU_755	0	0	0	0	0	0	0	2	0	0	0	0	0	0	0	0	0	0	0	0	0	0
OTU_332	0	0	0	0	0	0	0	1	0	0	0	0	0	0	0	0	0	0	0	0	0	0
OTU_178	0	0	0	0	0	0	0	1	0	0	0	0	0	0	0	0	0	0	0	0	0	0
OTU_518	0	0	0	0	0	0	0	2	0	0	0	0	0	0	0	0	0	0	0	0	0	0
OTU_422	0	0	0	0	0	0	0	1	0	0	0	0	0	4	0	0	0	0	0	0	0	0
OTU_952	0	0	0	0	0	0	0	2	0	0	0	0	0	0	0	0	0	0	0	0	0	0
OTU_967	0	0	0	0	0	0	0	2	0	0	0	0	0	0	0	0	0	0	0	0	0	0
OTU_278	0	0	0	0	0	0	0	1	0	0	0	0	0	0	0	0	0	0	0	0	0	0
OTU_272	0	0	0	0	0	0	0	1	0	0	0	0	0	10	0	0	0	0	0	0	0	0
OTU_420	0	0	0	0	0	0	0	2	0	0	0	0	0	0	0	0	0	0	0	0	0	0
OTU_520	0	0	0	0	0	0	0	3	0	0	0	0	0	0	0	0	0	0	0	0	0	0
OTU_838	0	0	0	0	0	0	0	3	0	0	0	0	0	1	0	1	0	0	0	0	0	0
OTU_383	0	0	0	0	0	0	0	3	0	0	0	0	0	5	4	1	0	0	0	0	0	0
OTU_43	0	0	0	0	0	0	0	2	0	0	0	0	0	0	0	0	0	0	0	50	0	0
OTU_595	0	0	0	0	0	0	0	1	0	0	0	0	0	0	0	0	0	0	0	0	0	0
OTU_324	0	0	0	0	0	0	0	1	0	0	0	0	0	0	0	0	0	0	0	0	0	0
OTU_1055	0	0	0	0	0	0	0	1	0	0	0	0	0	0	0	0	0	0	0	0	0	0
OTU_610	0	0	0	0	0	0	0	1	2	0	0	0	0	1	0	0	0	0	0	1	0	0
OTU_329	0	0	0	0	0	0	0	4	0	0	0	0	0	0	0	0	0	0	0	0	0	0
OTU_635	0	0	0	0	0	0	0	1	0	0	0	0	0	0	0	0	0	0	0	0	0	0
OTU_847	0	0	0	0	0	0	0	1	0	0	0	0	0	0	0	0	0	0	0	0	0	0
OTU_624	0	0	0	0	0	0	0	1	0	0	0	0	0	0	0	0	0	0	0	0	0	0
OTU_897	0	0	0	0	0	0	0	1	0	0	0	0	0	0	0	0	0	0	0	0	0	0
OTU_899	0	0	0	0	0	0	0	2	0	0	0	0	0	0	1	0	0	0	0	1	0	0
OTU_963	0	0	0	0	0	0	0	1	0	0	0	0	0	0	0	0	0	0	0	0	0	0
OTU_756	0	0	0	0	0	0	0	1	0	0	0	0	0	0	0	0	0	0	0	0	0	0
OTU_322	0	0	0	0	0	0	0	1	0	0	0	0	0	0	0	0	0	0	0	0	1	0
OTU_655	0	0	0	0	0	0	0	10	0	0	0	0	0	0	0	0	0	0	0	0	0	0
OTU_465	0	0	0	0	0	0	0	1	0	0	0	0	0	0	0	0	0	0	0	0	0	0
OTU_621	0	0	0	0	0	0	0	1	0	0	0	0	0	0	0	0	0	0	0	0	0	0
OTU_907	0	0	0	0	0	0	0	1	0	0	0	0	0	0	0	0	0	0	0	0	0	0
OTU_1002	0	0	0	0	0	0	0	1	0	0	0	0	0	0	0	0	0	0	0	0	0	0
OTU_275	0	0	0	0	0	0	0	1	0	0	0	0	0	0	0	0	0	0	0	0	0	0
OTU_1049	0	0	0	0	0	0	0	1	0	0	0	0	0	0	0	0	0	0	0	0	0	0
OTU_596	0	0	0	0	0	0	0	1	0	0	0	0	0	8	0	0	0	0	0	0	0	0
OTU_704	0	0	0	0	0	0	0	1	0	0	0	0	0	0	0	0	0	0	0	0	0	0
OTU_385	0	0	0	0	0	0	0	1	0	0	0	0	0	0	0	0	0	0	0	0	0	0
OTU_547	0	0	0	0	0	0	0	1	0	0	0	0	0	1	0	0	0	0	0	0	0	0
OTU_328	0	0	0	0	0	0	0	1	0	0	0	0	0	0	0	0	0	0	0	0	0	0
OTU_180	0	0	0	0	0	0	0	1	0	0	0	0	0	1	0	0	0	0	0	0	0	0
OTU_844	0	0	0	0	0	0	0	1	0	0	0	0	0	0	0	0	0	0	0	0	0	0
OTU_437	0	0	0	0	0	0	0	1	0	0	0	0	0	3	2	12	0	0	0	0	0	0
OTU_572	0	0	0	0	0	0	0	1	0	0	0	0	0	1	0	0	0	0	0	0	0	0
OTU_1102	0	0	0	0	0	0	0	1	0	0	0	0	0	0	0	0	0	0	0	0	0	0
OTU_1105	0	0	0	0	0	0	0	1	0	0	0	0	0	0	0	0	0	0	0	0	0	0
OTU_942	0	0	0	0	0	0	0	1	0	0	1	0	0	0	0	0	0	0	0	0	0	2
OTU_399	0	0	0	0	0	0	0	1	0	0	0	0	1	13	1	0	8	0	0	0	0	0
OTU_166	0	0	0	0	0	0	0	0	0	0	0	5	0	0	0	0	0	0	0	0	0	0
OTU_776	0	0	0	0	0	0	0	0	0	0	0	1	0	0	0	0	0	0	0	0	0	0
OTU_837	0	0	0	0	0	0	0	0	0	0	0	1	1	0	0	0	0	1	0	0	0	0
OTU_93	0	0	0	0	0	0	0	0	0	0	0	14	1	0	1	2	0	0	0	0	0	0
OTU_962	0	0	0	0	0	0	0	0	0	0	0	2	0	0	0	0	0	0	0	0	0	0
OTU_427	0	0	0	0	0	0	0	0	0	0	0	2	0	0	0	0	0	0	0	0	0	0
OTU_878	0	0	0	0	0	0	0	0	0	0	0	1	0	0	0	0	0	0	0	0	0	0
OTU_529	0	0	0	0	0	0	0	0	0	0	0	2	0	0	0	0	0	0	0	0	0	0
OTU_1074	0	0	0	0	0	0	0	0	0	0	0	3	0	0	0	0	0	0	0	0	0	0
OTU_447	0	0	0	0	0	0	0	0	0	0	0	1	0	0	0	0	0	0	0	0	0	0
OTU_959	0	0	0	0	0	0	0	0	0	0	0	1	0	0	0	0	0	0	0	0	0	0
OTU_455	0	0	0	0	0	0	0	0	0	0	0	1	0	0	0	0	0	0	0	0	0	0
OTU_296	0	0	0	0	0	0	0	0	0	0	0	1	0	0	0	0	0	0	0	0	0	0
OTU_256	0	0	0	0	0	0	0	0	0	0	0	2	0	0	0	0	0	0	0	0	0	0
OTU_1137	0	0	0	0	0	0	0	0	0	0	0	1	0	0	0	0	0	0	0	0	0	0
OTU_950	0	0	0	0	0	0	0	0	0	0	0	1	0	0	0	0	0	0	0	0	0	0
OTU_184	0	0	0	0	0	0	0	0	0	0	0	2	6	0	0	0	0	0	0	0	0	0
OTU_526	0	0	0	0	0	0	0	0	0	0	0	1	0	0	0	0	0	0	0	0	0	0
OTU_448	0	0	0	0	0	0	0	0	0	0	0	1	0	0	0	0	0	0	0	0	0	0
OTU_728	0	0	0	0	0	0	0	0	0	0	0	2	1	0	0	0	0	2	0	0	0	0
OTU_495	0	0	0	0	0	0	0	0	0	0	0	2	0	0	0	0	0	0	0	0	0	0
OTU_883	0	0	0	0	0	0	0	0	0	0	0	1	0	0	0	0	0	0	0	0	0	0
OTU_387	0	0	0	0	0	0	0	0	0	0	0	1	0	0	0	0	0	0	0	0	0	0
OTU_294	0	0	0	0	0	0	0	0	0	0	0	1	0	0	0	0	0	0	0	0	0	0
OTU_1041	0	0	0	0	0	0	0	0	0	0	0	1	0	0	0	0	0	0	0	0	0	0
OTU_1084	0	0	0	0	0	0	0	0	0	0	0	1	0	0	0	0	0	0	0	0	0	0
OTU_453	0	0	0	0	0	0	0	0	0	0	0	1	0	0	0	0	0	0	0	0	0	0
OTU_1113	0	0	0	0	0	0	0	0	1	0	0	1	0	0	0	0	0	1	1	0	0	0
OTU_457	0	0	0	0	0	0	0	0	0	0	0	1	0	0	0	0	0	0	0	0	0	0
OTU_402	0	0	0	0	0	0	0	0	0	0	0	1	0	0	0	0	0	0	0	0	0	0
OTU_773	0	0	0	0	0	0	0	0	0	0	0	1	0	0	0	0	0	0	0	0	0	0
OTU_700	0	0	0	0	0	0	0	0	0	0	0	1	0	0	0	0	0	0	0	0	0	0
OTU_850	0	0	0	0	0	0	0	0	0	0	0	1	0	0	0	0	0	0	0	0	0	0
OTU_167	0	0	0	0	0	0	0	0	0	0	0	0	7	0	0	0	0	0	0	0	0	0
OTU_1117	0	0	0	0	0	0	0	0	6	0	0	0	1	0	0	0	0	0	0	0	0	0
OTU_1024	0	0	0	0	0	0	0	0	4	1	0	0	2	0	0	0	0	0	1	0	0	0
OTU_449	0	0	0	0	0	0	0	0	1	0	0	0	1	0	0	0	0	0	0	0	0	0
OTU_914	0	0	0	0	0	0	0	0	11	21	0	0	4	0	0	0	0	0	10	0	0	0
OTU_454	0	0	0	0	0	0	0	0	0	0	0	0	1	0	0	0	0	0	0	0	0	0
OTU_174	0	0	0	0	0	0	0	0	0	0	0	0	1	0	0	0	0	0	0	0	0	0
OTU_676	0	0	0	0	0	0	0	0	0	0	0	0	1	0	0	0	0	0	0	0	0	0
OTU_735	0	0	0	0	0	0	0	0	0	0	0	0	1	0	0	0	0	0	0	0	0	0
OTU_990	0	0	0	0	0	0	0	0	0	0	0	0	1	0	0	0	0	0	1	0	0	0
OTU_825	0	0	0	0	0	0	0	0	1	1	0	0	1	0	0	0	0	0	5	0	0	0
OTU_443	0	0	0	0	0	0	0	0	0	0	0	0	1	0	0	0	0	0	0	0	0	0
OTU_822	0	0	0	0	0	0	0	0	0	0	0	0	4	0	0	0	0	0	10	0	0	0
OTU_1073	0	0	0	0	0	0	0	0	0	0	0	0	1	0	0	0	0	0	0	0	0	0
OTU_639	0	0	0	0	0	0	0	0	0	0	0	0	1	0	0	0	0	0	1	0	0	0
OTU_381	0	0	0	0	0	0	0	0	0	0	0	0	1	0	0	0	0	0	0	0	0	0
OTU_896	0	0	0	0	0	0	0	0	1	1	0	0	2	0	0	0	0	0	6	0	0	0
OTU_235	0	0	0	0	0	0	0	0	0	0	0	0	1	0	0	0	0	0	0	0	0	0
OTU_1050	0	0	0	0	0	0	0	0	0	0	0	0	2	0	0	0	0	0	0	0	0	0
OTU_698	0	0	0	0	0	0	0	0	0	0	0	0	2	0	0	0	0	0	0	0	0	0
OTU_890	0	0	0	0	0	0	0	0	0	0	0	0	1	0	0	0	0	0	1	0	0	0
OTU_541	0	0	0	0	0	0	0	0	0	0	0	0	1	0	0	0	0	0	0	0	0	0
OTU_889	0	0	0	0	0	0	0	0	0	0	0	0	1	0	0	0	0	0	0	0	0	0
OTU_259	0	0	0	0	0	0	0	0	0	0	0	0	1	0	0	0	0	0	0	0	0	0
OTU_497	0	0	0	0	0	0	0	0	0	0	0	0	1	0	0	0	0	0	0	0	0	0
OTU_558	0	0	0	0	0	0	0	0	2	1	0	0	1	0	0	0	0	0	6	0	0	0
OTU_1048	0	0	0	0	0	0	0	0	0	0	0	0	1	0	0	0	0	0	0	0	0	0
OTU_430	0	0	0	0	0	0	0	0	3	0	0	0	1	0	0	0	0	0	0	0	0	0
OTU_164	0	0	0	0	0	0	0	0	0	0	0	0	3	0	0	0	0	0	0	0	0	0
OTU_696	0	0	0	0	0	0	0	0	0	0	0	0	1	0	0	0	0	0	0	0	0	0
OTU_404	0	0	0	0	0	0	0	0	0	0	0	0	1	0	0	0	0	0	0	0	0	0
OTU_623	0	0	0	0	0	0	0	0	0	0	0	0	1	0	0	0	3	0	0	0	0	0
OTU_493	0	0	0	0	0	0	0	0	0	0	0	0	1	0	0	0	0	0	0	0	0	0
OTU_213	0	0	0	0	0	0	0	0	2	0	0	0	1	0	0	0	0	0	0	0	0	0
OTU_450	0	0	0	0	0	0	0	0	0	0	0	0	1	0	0	0	0	0	0	0	0	0
OTU_664	0	0	0	0	0	0	0	0	1	0	0	0	1	0	0	0	0	0	3	0	0	0
OTU_975	0	0	0	0	0	0	0	0	5	0	0	0	2	5	0	0	7	0	0	0	0	0
OTU_603	0	0	0	0	0	0	0	0	0	0	0	0	1	0	0	0	0	0	0	0	0	0
OTU_524	0	0	0	0	0	0	0	0	0	0	0	0	1	0	0	0	0	0	0	0	0	0
OTU_840	0	0	0	0	0	0	0	0	0	0	0	0	1	0	0	0	0	0	0	0	0	0
OTU_181	0	0	0	0	0	0	0	0	0	0	0	0	1	0	0	0	0	0	0	0	0	0
OTU_843	0	0	0	0	0	0	0	0	0	0	0	0	0	123	39	15	8	0	0	0	0	0
OTU_494	0	0	0	0	0	0	0	0	0	0	0	0	0	2	0	0	0	0	0	0	0	0
OTU_168	0	0	0	0	0	0	0	0	0	0	0	0	0	4	0	0	0	0	0	0	0	0
OTU_849	0	0	0	0	0	0	0	0	0	0	0	0	0	9	42	9	4	0	0	0	0	0
OTU_658	0	0	0	0	0	0	0	0	0	0	0	0	0	1	0	10	10	0	0	0	0	0
OTU_301	0	0	0	0	0	0	0	0	0	0	0	0	0	183	101	28	33	0	0	2	0	0
OTU_1095	0	0	0	0	0	0	0	0	0	0	0	0	0	5	34	26	5	0	0	0	0	0
OTU_273	0	0	0	0	0	0	0	0	0	0	0	0	0	11	3	1	0	0	0	0	0	0
OTU_974	0	0	0	0	0	0	0	0	0	0	0	0	0	18	0	0	0	0	0	0	0	0
OTU_645	0	0	0	0	0	0	0	0	0	0	0	0	0	11	19	5	2	0	0	0	0	0
OTU_423	0	0	0	0	0	0	0	0	0	0	0	0	0	60	81	20	8	0	0	0	0	0
OTU_772	0	0	0	0	0	0	0	0	0	0	0	0	0	1	0	0	0	0	0	0	0	0
OTU_656	0	0	0	0	0	0	0	0	0	0	0	0	0	1	0	0	0	0	0	0	0	0
OTU_123	0	0	0	0	0	0	0	0	0	0	0	0	0	14	0	0	0	0	0	0	0	0
OTU_525	0	0	0	0	0	0	0	0	0	0	0	0	0	8	20	4	3	0	0	0	0	0
OTU_150	0	0	0	0	0	0	0	0	0	0	0	0	0	2	12	1	2	0	0	0	0	0
OTU_194	0	0	0	0	0	0	0	0	0	0	0	0	0	1	0	1	1	0	0	3	0	0
OTU_439	0	0	0	0	0	0	0	0	0	0	0	0	0	4	1	0	0	0	0	0	0	0
OTU_1107	0	0	0	0	0	0	0	0	0	0	0	0	0	16	55	44	12	0	0	0	0	0
OTU_842	0	0	0	0	0	0	0	0	0	1	0	0	0	22	1	0	0	0	0	0	0	0
OTU_361	0	0	0	0	0	0	0	0	0	0	0	0	0	16	0	0	0	0	0	0	0	0
OTU_436	0	0	0	0	0	0	0	0	0	0	0	0	0	1	17	4	0	0	0	0	0	0
OTU_185	0	0	0	0	0	0	0	0	0	0	0	0	0	4	2	0	0	0	0	0	0	0
OTU_581	0	0	0	0	0	0	0	0	0	0	0	0	0	1	0	0	0	0	0	0	0	0
OTU_788	0	0	0	0	0	0	0	0	0	0	0	0	0	2	1	0	0	0	0	0	0	0
OTU_375	0	0	0	0	0	0	0	0	0	0	0	0	0	6	2	0	0	0	0	0	0	0
OTU_542	0	0	0	0	0	0	0	0	0	0	0	0	0	2	15	0	0	0	0	0	0	0
OTU_351	0	0	0	0	0	0	0	0	0	0	0	0	0	3	0	10	0	0	0	0	0	0
OTU_869	0	0	0	0	0	0	0	0	0	0	0	0	0	7	8	1	0	0	0	0	0	0
OTU_1006	0	0	0	0	0	0	0	0	0	1	0	0	0	2	2	0	0	0	2	0	0	0
OTU_846	0	0	0	0	0	0	0	0	0	0	0	0	0	1	5	2	3	0	0	0	0	0
OTU_299	0	0	0	0	0	0	0	0	0	0	0	0	0	1	0	0	0	0	0	0	0	0
OTU_688	0	0	0	0	0	0	0	0	0	0	0	0	0	1	2	0	1	0	0	0	0	0
OTU_1063	0	0	0	0	0	0	0	0	0	0	0	0	0	2	0	0	0	0	0	0	0	0
OTU_893	0	0	0	0	0	0	0	0	0	0	0	0	0	1	1	0	0	0	0	0	0	0
OTU_881	0	0	0	0	0	0	0	0	0	0	0	0	0	3	1	0	0	0	0	0	0	0
OTU_274	0	0	0	0	0	0	0	0	0	0	0	0	0	4	0	0	0	0	0	0	0	0
OTU_699	0	0	0	0	0	0	0	0	0	0	0	0	0	3	5	1	0	0	0	0	0	0
OTU_956	0	0	0	0	0	0	0	0	0	0	0	0	0	2	1	1	1	0	0	0	0	0
OTU_428	0	0	0	0	0	0	0	0	0	0	0	0	0	5	4	0	0	0	0	8	0	0
OTU_643	0	0	0	0	0	0	0	0	0	0	0	0	0	1	1	0	1	0	0	0	0	0
OTU_188	0	0	0	0	0	0	0	0	0	0	0	0	0	1	1	2	0	0	0	0	0	0
OTU_790	0	0	0	0	0	0	0	0	1	0	0	0	0	4	0	0	0	0	0	0	0	0
OTU_1009	0	0	0	0	0	0	0	0	0	0	0	0	0	1	0	0	0	0	0	0	0	0
OTU_388	0	0	0	0	0	0	0	0	0	0	0	0	0	1	0	0	0	0	0	0	0	0
OTU_165	0	0	0	0	0	0	0	0	0	0	0	0	0	2	0	0	0	0	0	0	0	0
OTU_1008	0	0	0	0	0	0	0	0	0	0	0	0	0	1	0	0	0	0	0	0	0	0
OTU_297	0	0	0	0	0	0	0	0	0	0	0	0	0	1	4	0	1	0	0	0	0	0
OTU_379	0	0	0	0	0	0	0	0	0	0	0	0	0	1	2	0	1	0	0	0	0	0
OTU_746	0	0	0	0	0	0	0	0	0	0	0	0	0	2	0	0	0	0	0	0	0	0
OTU_768	0	0	0	0	0	0	0	0	0	0	0	0	0	2	0	1	2	0	0	0	0	0
OTU_258	0	0	0	0	0	0	0	0	0	0	0	0	0	1	2	2	3	0	0	0	0	0
OTU_583	0	0	0	0	0	0	0	0	0	0	0	0	0	1	0	0	0	0	0	0	0	0
OTU_435	0	0	0	0	0	0	0	0	0	0	0	0	0	1	2	0	1	0	0	0	0	0
OTU_1086	0	0	0	0	0	0	0	0	0	0	0	0	0	1	0	0	0	0	0	0	0	0
OTU_702	0	0	0	0	0	0	0	0	0	0	0	0	0	1	0	0	0	0	0	0	0	0
OTU_543	0	0	0	0	0	0	0	0	0	0	0	0	0	1	0	0	0	0	0	0	0	0
OTU_384	0	0	0	0	0	0	0	0	0	0	0	0	0	1	0	0	0	0	0	0	0	0
OTU_393	0	0	0	0	0	0	0	0	0	0	0	0	0	1	0	0	0	0	0	0	0	0
OTU_396	0	0	0	0	0	0	0	0	0	0	0	0	0	1	0	0	0	0	0	0	0	0
OTU_606	0	0	0	0	0	0	0	0	0	0	0	0	0	0	3	0	0	0	0	0	0	0
OTU_113	0	0	0	0	0	0	0	0	0	0	0	0	0	0	15	1	0	0	0	0	0	0
OTU_405	0	0	0	0	0	0	0	0	0	0	0	0	0	0	1	1	3	0	0	0	0	0
OTU_127	0	0	0	0	0	0	0	0	0	0	0	0	0	0	13	3	5	0	0	0	0	0
OTU_1030	0	0	0	0	0	0	0	0	0	0	0	0	0	0	9	0	0	0	0	0	0	0
OTU_298	0	0	0	0	0	0	0	0	0	0	0	0	0	0	12	0	1	0	0	0	0	0
OTU_117	0	0	0	0	0	0	0	0	0	0	0	0	0	0	21	0	0	0	0	24	0	0
OTU_789	0	0	0	0	0	0	0	0	0	0	0	0	0	0	1	0	0	0	0	0	0	0
OTU_880	0	0	0	0	0	0	0	0	0	0	0	0	0	0	3	0	0	0	0	0	0	0
OTU_261	0	0	0	0	0	0	0	0	0	0	0	0	0	0	7	6	2	0	0	0	0	0
OTU_1031	0	0	0	0	0	0	0	0	0	0	0	0	0	0	1	0	0	0	0	0	0	0
OTU_845	0	0	0	0	0	0	0	0	0	0	0	0	0	0	1	0	0	0	0	0	0	0
OTU_791	0	0	0	0	0	0	0	0	0	0	0	0	0	0	2	0	0	0	0	0	0	0
OTU_304	0	0	0	0	0	0	0	0	0	0	0	0	0	0	1	0	0	0	0	0	0	0
OTU_255	0	0	0	0	0	0	0	0	0	0	0	0	0	0	6	11	12	0	0	0	0	0
OTU_546	0	0	0	0	0	0	0	0	0	0	0	0	0	0	1	0	0	0	0	0	0	0
OTU_257	0	0	0	0	0	0	0	0	0	0	0	0	0	0	1	1	0	0	0	0	0	0
OTU_302	0	0	0	0	0	0	0	0	0	0	0	0	0	0	1	0	0	0	0	0	0	0
OTU_134	0	0	0	0	0	0	0	0	0	0	0	0	0	0	3	15	2	0	0	0	0	0
OTU_473	0	0	0	0	0	0	0	0	0	0	0	0	0	0	2	0	0	0	0	0	0	0
OTU_1040	0	0	0	0	0	0	0	0	0	0	0	0	0	0	1	1	0	0	0	0	0	0
OTU_1039	0	0	0	0	0	0	0	0	0	0	0	0	0	0	1	0	0	0	0	0	0	0
OTU_300	0	0	0	0	0	0	0	0	0	0	0	0	0	0	0	5	0	0	0	0	0	0
OTU_900	0	0	0	0	0	0	0	0	0	0	0	0	0	0	0	3	0	0	0	0	0	0
OTU_438	0	0	0	0	0	0	0	0	0	0	0	0	0	0	0	12	1	0	0	0	0	0
OTU_145	0	0	0	0	0	0	0	0	0	0	0	0	0	0	0	1	7	0	0	0	0	0
OTU_991	0	0	0	0	0	0	0	0	0	0	0	0	0	0	0	1	0	0	0	0	0	0
OTU_584	0	0	0	0	0	0	0	0	0	0	0	0	0	0	0	1	0	0	0	0	0	0
OTU_377	0	0	0	0	0	0	0	0	0	0	0	0	0	0	0	6	0	0	0	0	0	0
OTU_689	0	0	0	0	0	0	0	0	0	0	0	0	0	0	0	2	0	0	0	0	0	0
OTU_116	0	0	0	0	0	0	0	0	0	0	0	0	0	0	0	3	0	0	0	0	0	27
OTU_626	0	0	0	0	0	0	0	0	0	0	0	0	0	0	0	1	0	0	0	0	0	0
OTU_1108	0	0	0	0	0	0	0	0	0	0	0	0	0	0	0	1	0	0	0	0	0	0
OTU_1094	0	0	0	0	0	0	0	0	0	0	0	0	0	0	0	1	0	0	0	0	0	0
OTU_691	0	0	0	0	0	0	0	0	0	0	0	0	0	0	0	3	0	0	0	0	0	0
OTU_690	0	0	0	0	0	0	0	0	0	0	0	0	0	0	0	1	0	0	0	0	0	0
OTU_507	0	0	0	0	0	0	0	0	0	0	0	0	0	0	0	1	0	0	0	0	0	0
OTU_877	0	0	0	0	0	0	0	0	0	0	0	0	0	0	0	3	0	0	0	0	0	0
OTU_1110	0	0	0	0	0	0	0	0	0	0	0	0	0	0	0	1	0	0	0	0	0	0
OTU_903	0	0	0	0	0	0	0	0	0	0	0	0	0	0	0	1	0	0	0	0	0	0
OTU_508	0	0	0	0	0	0	0	0	0	0	0	0	0	0	0	3	0	0	0	0	0	0
OTU_426	0	0	0	0	0	0	0	0	0	0	0	0	0	0	0	1	0	0	0	0	0	0
OTU_1077	0	0	0	0	0	0	0	0	0	0	0	0	0	0	0	1	0	0	0	0	0	0
OTU_409	0	0	0	0	0	0	0	0	0	0	0	0	0	0	0	0	1	0	0	0	0	0
OTU_353	0	0	0	0	0	0	0	0	0	0	0	0	0	0	0	0	6	0	0	0	0	0
OTU_999	0	0	0	0	0	0	0	0	0	0	0	0	0	0	0	0	3	0	0	0	0	0
OTU_830	0	0	0	0	0	0	0	0	0	0	0	0	0	0	0	0	1	0	0	0	0	0
OTU_406	0	0	0	0	0	0	0	0	0	0	0	0	0	0	0	0	3	0	0	0	0	0
OTU_593	0	0	0	0	0	0	0	0	0	0	0	0	0	0	0	0	1	0	0	0	0	0
OTU_367	0	0	0	0	0	0	0	0	0	0	0	0	0	0	0	0	1	0	0	0	0	0
OTU_925	0	0	0	0	0	0	0	0	0	0	0	0	0	0	0	0	1	0	0	0	0	0
OTU_585	0	0	0	0	0	0	0	0	0	0	0	0	0	0	0	0	3	0	0	0	0	0
OTU_360	0	0	0	0	0	0	0	0	0	0	0	0	0	0	0	0	2	0	0	0	0	0
OTU_306	0	0	0	0	0	0	0	0	0	0	0	0	0	0	0	0	2	0	0	0	0	0
OTU_747	0	0	0	0	0	0	0	0	0	0	0	0	0	0	0	0	2	0	0	0	0	0
OTU_706	0	0	0	0	0	0	0	0	0	0	0	0	0	0	0	0	1	0	0	0	0	0
OTU_239	0	0	0	0	0	0	0	0	0	0	0	0	0	0	0	0	2	0	0	0	0	0
OTU_433	0	0	0	0	0	0	0	0	0	0	0	0	0	0	0	0	4	0	0	0	0	0
OTU_352	0	0	0	0	0	0	0	0	0	0	0	0	0	0	0	0	1	0	0	0	0	0
OTU_310	0	0	0	0	0	0	0	0	0	0	0	0	0	0	0	0	1	0	0	0	0	0
OTU_940	0	0	0	0	0	0	0	0	0	0	0	0	0	0	0	0	1	0	0	0	0	0
OTU_736	0	0	0	0	0	0	0	0	0	0	0	0	0	0	0	0	1	0	0	0	0	0
OTU_737	0	0	0	0	0	0	0	0	0	0	0	0	0	0	0	0	1	0	0	0	0	0
OTU_354	0	0	0	0	0	0	0	0	0	0	0	0	0	0	0	0	1	0	0	0	0	0
OTU_485	0	0	0	0	0	0	0	0	0	0	0	0	0	0	0	0	1	0	0	0	0	0
OTU_920	0	0	0	0	0	0	0	0	0	0	0	0	0	0	0	0	1	0	0	0	0	0
OTU_252	0	0	0	0	0	0	0	0	0	0	0	0	0	0	0	0	1	0	0	0	0	0
OTU_622	0	0	0	0	0	0	0	0	0	0	0	0	0	0	0	0	1	0	0	0	0	0
OTU_20	0	0	0	0	0	0	0	0	0	0	0	0	0	0	0	0	0	0	0	0	0	205
OTU_927	0	0	0	0	0	0	0	0	0	0	0	0	0	0	0	0	0	0	0	0	0	1
OTU_22	0	0	0	0	0	0	0	0	0	0	2	0	0	0	0	0	0	354	51	63	0	409
OTU_33	0	0	0	0	0	0	0	0	0	0	0	0	0	0	0	0	0	0	0	0	3	107
OTU_926	0	0	0	0	0	0	0	0	0	0	0	0	0	0	0	0	0	0	0	0	0	3
OTU_573	0	0	0	0	0	0	0	0	0	0	0	0	0	0	0	0	0	0	0	0	0	1
OTU_15	0	0	0	0	0	0	0	0	2	107	1	0	0	0	0	0	0	293	0	83	0	316
OTU_1033	0	0	0	0	0	0	0	0	0	0	0	0	0	0	0	0	0	0	0	0	0	2
OTU_215	0	0	0	0	0	0	0	0	0	2	0	0	0	0	0	0	0	0	0	0	0	1
OTU_240	0	0	0	0	0	0	0	0	0	1	1	0	0	0	0	0	1	0	0	1	0	2
OTU_590	0	0	0	0	0	0	0	0	0	0	0	0	0	0	0	0	0	0	0	0	0	2
OTU_102	0	0	0	0	0	0	0	0	0	5	125	0	0	0	0	0	0	1806	0	2	0	7
OTU_512	0	0	0	0	0	0	0	0	0	0	0	0	0	0	0	0	0	0	0	0	0	3
OTU_786	0	0	0	0	0	0	0	0	0	0	0	0	0	0	0	0	0	0	1	0	0	1
OTU_742	0	0	0	0	0	0	0	0	0	0	0	0	0	0	0	0	0	0	0	0	0	2
OTU_169	0	0	0	0	0	0	0	0	0	2	0	0	0	0	0	0	0	0	0	0	0	9
OTU_115	0	0	0	0	0	0	0	0	0	3	0	0	0	0	0	0	0	0	0	0	13	87
OTU_64	0	0	0	0	0	0	0	0	38	10	9	0	0	0	0	0	0	1	12	0	2	102
OTU_344	0	0	0	0	0	0	0	0	0	0	0	0	0	0	0	0	0	0	0	0	0	1
OTU_140	0	0	0	0	0	0	0	0	0	0	0	0	0	0	0	0	0	0	0	0	0	10
OTU_83	0	0	0	0	0	0	0	0	0	16	0	0	0	0	0	0	0	0	2	0	2	17
OTU_1118	0	0	0	0	0	0	0	0	0	0	0	0	0	0	0	0	0	0	0	0	0	2
OTU_515	0	0	0	0	0	0	0	0	0	0	0	0	0	0	0	0	0	0	4	0	0	13
OTU_484	0	0	0	0	0	0	0	0	0	0	0	0	0	0	0	0	0	0	0	0	2	1
OTU_365	0	0	0	0	0	0	0	0	0	0	0	0	0	0	0	0	0	0	0	0	0	2
OTU_1079	0	0	0	0	0	0	0	0	0	1	0	0	0	0	0	0	0	0	0	0	0	1
OTU_651	0	0	0	0	0	0	0	0	0	0	0	0	0	0	0	0	0	0	0	0	0	1
OTU_334	0	0	0	0	0	0	0	0	0	0	0	0	0	0	0	0	0	0	1	0	0	6
OTU_42	0	0	0	0	0	0	0	0	0	9	0	0	0	0	0	0	0	0	22	0	0	2
OTU_366	0	0	0	0	0	0	0	0	0	0	0	0	0	0	0	0	0	0	0	0	0	1
OTU_660	0	0	0	0	0	0	0	0	0	0	0	0	0	0	0	0	0	0	0	0	0	2
OTU_741	0	0	0	0	0	0	0	0	0	0	0	0	0	0	0	0	0	0	0	0	0	1
OTU_681	0	0	0	0	0	0	0	0	0	0	0	0	0	0	0	0	0	0	0	0	0	2
OTU_1080	0	0	0	0	0	0	0	0	0	0	0	0	0	0	0	0	0	0	0	0	0	1
OTU_740	0	0	0	0	0	0	0	0	0	0	0	0	0	0	0	0	0	0	0	0	0	1
OTU_826	0	0	0	0	0	0	0	0	0	0	0	0	0	0	0	0	0	0	0	0	0	1
OTU_701	0	0	0	0	0	0	0	0	0	0	0	0	0	0	0	0	0	0	0	0	0	1
OTU_249	0	0	0	0	0	0	0	0	0	0	0	0	0	0	0	0	0	0	0	0	0	1
OTU_887	0	0	0	0	0	0	0	0	0	0	0	0	0	0	0	0	0	0	0	0	0	1
OTU_646	0	0	0	0	0	0	0	0	0	0	0	0	0	0	0	0	0	0	0	0	0	1
OTU_250	0	0	0	0	0	0	0	0	0	0	0	0	0	0	0	0	0	0	0	0	0	1
OTU_1096	0	0	0	0	0	0	0	0	0	0	1	0	0	0	0	0	0	0	0	0	0	2
OTU_929	0	0	0	0	0	0	0	0	0	0	0	0	0	0	0	0	0	0	0	0	0	1
OTU_574	0	0	0	0	0	0	0	0	0	0	0	0	0	0	0	0	0	0	0	0	0	1
OTU_1081	0	0	0	0	0	0	0	0	0	0	0	0	0	0	0	0	0	0	0	0	0	1
OTU_743	0	0	0	0	0	0	0	0	0	0	0	0	0	0	0	0	0	0	0	0	0	1
OTU_363	0	0	0	0	0	0	0	0	0	0	0	0	0	0	0	0	0	0	0	0	0	1
OTU_867	0	0	0	0	0	0	0	0	0	0	0	0	0	0	0	0	0	0	0	0	0	2
OTU_661	0	0	0	0	0	0	0	0	0	0	0	0	0	0	0	0	0	0	0	0	0	1
OTU_856	0	0	0	0	0	0	0	0	0	0	0	0	0	0	0	0	0	0	0	0	0	1
OTU_833	0	0	0	0	0	0	0	0	0	1	0	0	0	0	0	0	0	0	2	0	0	2
OTU_407	0	0	0	0	0	0	0	0	0	0	0	0	0	0	0	0	0	1	0	0	0	1
OTU_898	0	0	0	0	0	0	0	0	0	0	0	0	0	0	0	0	0	0	0	0	0	1
OTU_211	0	0	0	0	0	0	0	0	0	0	0	0	0	0	0	0	0	0	0	0	1	1
OTU_993	0	0	0	0	0	0	0	0	0	0	0	0	0	0	0	0	0	1	0	0	0	1
OTU_444	0	0	0	0	0	0	0	0	0	0	0	0	0	0	0	0	0	0	0	0	1	1
OTU_909	0	0	0	0	0	0	0	0	0	0	3	0	0	0	0	0	0	0	0	0	1	1
OTU_1120	0	0	0	0	0	0	0	0	0	0	0	0	0	0	0	0	0	0	0	0	0	1
OTU_1054	0	0	0	0	0	0	0	0	0	2	0	0	0	0	0	0	0	0	1	0	0	2
OTU_120	0	0	0	0	0	0	0	0	5	0	0	0	0	0	0	0	0	0	0	0	0	0
OTU_131	0	0	0	0	0	0	0	0	3	0	0	0	0	0	0	0	0	0	2	0	0	0
OTU_358	0	0	0	0	0	0	0	0	1	0	0	0	0	0	0	0	0	0	0	0	0	0
OTU_410	0	0	0	0	0	0	0	0	1	0	0	0	0	0	0	0	0	0	0	0	0	0
OTU_48	0	0	0	0	0	0	0	0	55	0	0	0	0	0	0	0	0	0	0	0	0	0
OTU_679	0	0	0	0	0	0	0	0	2	0	0	0	0	0	0	0	0	0	3	0	0	0
OTU_823	0	0	0	0	0	0	0	0	1	1	0	0	0	0	0	0	0	0	0	0	0	0
OTU_888	0	0	0	0	0	0	0	0	10	0	0	0	0	0	0	0	0	0	0	0	0	0
OTU_612	0	0	0	0	0	0	0	0	1	0	0	0	0	0	0	0	0	0	0	0	0	0
OTU_831	0	0	0	0	0	0	0	0	14	0	0	0	0	0	0	0	0	0	0	0	0	0
OTU_1119	0	0	0	0	0	0	0	0	2	0	0	0	0	0	0	0	0	0	0	0	0	0
OTU_613	0	0	0	0	0	0	0	0	1	0	0	0	0	0	0	0	0	0	1	0	0	0
OTU_723	0	0	0	0	0	0	0	0	1	0	0	0	0	0	0	0	0	0	0	0	0	0
OTU_193	0	0	0	0	0	0	0	0	3	0	0	0	0	0	0	0	0	0	3	0	0	0
OTU_564	0	0	0	0	0	0	0	0	12	3	0	0	0	0	0	0	0	0	2	0	0	0
OTU_674	0	0	0	0	0	0	0	0	3	0	0	0	0	0	0	0	0	0	7	0	0	0
OTU_356	0	0	0	0	0	0	0	0	1	0	0	0	0	0	0	0	0	0	0	0	0	0
OTU_627	0	0	0	0	0	0	0	0	1	0	0	0	0	0	0	0	0	0	0	0	0	0
OTU_879	0	0	0	0	0	0	0	0	1	0	0	0	0	0	0	0	0	0	1	0	0	0
OTU_739	0	0	0	0	0	0	0	0	2	0	0	0	0	0	0	0	0	0	1	0	0	0
OTU_763	0	0	0	0	0	0	0	0	3	0	0	0	0	0	0	0	0	0	0	0	0	0
OTU_862	0	0	0	0	0	0	0	0	2	0	0	0	0	0	0	0	0	0	1	0	0	0
OTU_667	0	0	0	0	0	0	0	0	1	0	0	0	0	0	0	0	0	0	1	0	0	0
OTU_1092	0	0	0	0	0	0	0	0	1	0	0	0	0	0	0	0	0	0	1	0	0	0
OTU_470	0	0	0	0	0	0	0	0	3	0	0	0	0	0	0	0	0	0	0	0	0	0
OTU_153	0	0	0	0	0	0	0	0	2	0	0	0	0	0	0	0	0	0	0	0	0	0
OTU_995	0	0	0	0	0	0	0	0	1	0	0	0	0	0	0	0	0	0	0	0	0	0
OTU_609	0	0	0	0	0	0	0	0	1	0	0	0	0	0	0	0	0	0	0	0	0	0
OTU_662	0	0	0	0	0	0	0	0	1	0	0	0	0	0	0	0	0	0	0	0	0	0
OTU_469	0	0	0	0	0	0	0	0	2	0	0	0	0	0	0	0	0	0	1	0	0	0
OTU_309	0	0	0	0	0	0	0	0	1	0	0	0	0	0	0	0	0	0	0	0	0	0
OTU_611	0	0	0	0	0	0	0	0	1	2	0	0	0	0	0	0	0	0	2	0	0	0
OTU_230	0	0	0	0	0	0	0	0	1	0	0	0	0	0	0	0	0	0	0	0	0	0
OTU_308	0	0	0	0	0	0	0	0	1	0	0	0	0	0	0	0	0	0	0	0	0	0
OTU_233	0	0	0	0	0	0	0	0	1	0	0	0	0	0	0	0	0	0	0	0	0	0
OTU_459	0	0	0	0	0	0	0	0	1	0	0	0	0	0	0	0	0	0	0	0	0	0
OTU_509	0	0	0	0	0	0	0	0	1	0	0	0	0	0	0	0	0	0	0	0	0	0
OTU_460	0	0	0	0	0	0	0	0	1	0	0	0	0	0	0	0	0	0	1	0	0	0
OTU_1114	0	0	0	0	0	0	0	0	1	0	0	0	0	0	0	0	0	0	0	0	0	0
OTU_337	0	0	0	0	0	0	0	0	1	0	0	0	0	0	0	0	0	0	0	0	0	0
OTU_777	0	0	0	0	0	0	0	0	1	0	0	0	0	0	0	0	0	0	0	0	0	0
OTU_1059	0	0	0	0	0	0	0	0	1	2	0	0	0	0	0	0	0	0	0	0	0	0
OTU_565	0	0	0	0	0	0	0	0	1	0	0	0	0	0	0	0	0	0	0	0	0	0
OTU_566	0	0	0	0	0	0	0	0	1	0	0	0	0	0	0	0	0	0	0	0	0	0
OTU_1116	0	0	0	0	0	0	0	0	2	0	0	0	0	0	0	0	0	0	0	0	0	0
OTU_848	0	0	0	0	0	0	0	0	1	0	0	0	0	0	0	0	0	0	0	0	0	0
OTU_221	0	0	0	0	0	0	0	0	1	1	0	0	0	0	0	0	0	0	1	0	0	0
OTU_231	0	0	0	0	0	0	0	0	1	0	0	0	0	0	0	0	0	0	0	0	0	0
OTU_637	0	0	0	0	0	0	0	0	1	0	0	0	0	0	0	0	0	0	0	0	0	0
OTU_1028	0	0	0	0	0	0	0	0	1	0	0	0	0	0	0	0	0	0	2	0	0	0
OTU_349	0	0	0	0	0	0	0	0	1	2	0	0	0	0	0	0	0	0	0	0	0	0
OTU_712	0	0	0	0	0	0	0	0	0	3	0	0	0	0	0	0	0	0	0	0	0	0
OTU_204	0	0	0	0	0	0	0	0	0	1	0	0	0	0	0	0	0	0	0	0	1	0
OTU_96	0	0	0	0	0	0	0	0	0	85	0	0	0	0	0	0	0	0	0	0	0	0
OTU_135	0	0	0	0	0	0	0	0	0	22	0	0	0	0	0	0	0	0	0	0	0	0
OTU_265	0	0	0	0	0	0	0	0	1	2	0	0	0	0	0	0	0	0	1	0	0	0
OTU_562	0	0	0	0	0	0	0	0	0	1	0	0	0	0	0	0	0	0	0	0	0	0
OTU_97	0	0	0	0	0	0	0	0	0	18	0	0	0	0	0	0	0	0	0	0	0	0
OTU_711	0	0	0	0	0	0	0	0	0	1	0	0	0	0	0	0	0	0	0	0	0	0
OTU_156	0	0	0	0	0	0	0	0	0	2	0	0	0	0	0	0	0	0	0	0	0	0
OTU_933	0	0	0	0	0	0	0	0	0	1	0	0	0	0	0	0	0	0	0	0	0	0
OTU_464	0	0	0	0	0	0	0	0	0	3	0	0	0	0	0	0	0	0	0	0	0	0
OTU_930	0	0	0	0	0	0	0	0	0	2	0	0	0	0	0	0	0	0	0	0	0	0
OTU_1066	0	0	0	0	0	0	0	0	0	1	0	0	0	0	0	0	0	0	0	0	0	0
OTU_374	0	0	0	0	0	0	0	0	0	1	0	0	0	0	0	0	0	0	0	0	0	0
OTU_1051	0	0	0	0	0	0	0	0	0	1	0	0	0	0	0	0	0	1	0	0	0	0
OTU_710	0	0	0	0	0	0	0	0	0	1	0	0	0	0	0	0	0	0	0	0	0	0
OTU_796	0	0	0	0	0	0	0	0	0	1	0	0	0	0	0	0	0	0	0	0	0	0
OTU_1087	0	0	0	0	0	0	0	0	0	1	0	0	0	0	0	0	0	0	0	0	0	0
OTU_799	0	0	0	0	0	0	0	0	0	1	0	0	0	0	0	0	0	0	0	0	0	0
OTU_936	0	0	0	0	0	0	0	0	0	1	0	0	0	0	0	0	0	4	0	0	0	0
OTU_787	0	0	0	0	0	0	0	0	0	1	0	0	0	0	0	0	0	1	0	0	0	0
OTU_989	0	0	0	0	0	0	0	0	0	1	0	0	0	0	0	0	0	0	0	0	0	0
OTU_1034	0	0	0	0	0	0	0	0	0	1	0	0	0	0	0	0	0	0	0	0	0	0
OTU_798	0	0	0	0	0	0	0	0	0	2	0	0	0	0	0	0	0	0	0	0	0	0
OTU_563	0	0	0	0	0	0	0	0	0	1	0	0	0	0	0	0	0	0	0	0	0	0
OTU_733	0	0	0	0	0	0	0	0	0	1	0	0	0	0	0	0	0	0	2	0	0	0
OTU_978	0	0	0	0	0	0	0	0	0	1	0	0	0	0	0	0	0	0	0	0	0	0
OTU_510	0	0	0	0	0	0	0	0	0	1	0	0	0	0	0	0	0	0	0	0	0	0
OTU_576	0	0	0	0	0	0	0	0	0	1	0	0	0	0	0	0	0	0	0	0	0	0
OTU_462	0	0	0	0	0	0	0	0	0	1	0	0	0	0	0	0	0	0	0	0	0	0
OTU_1075	0	0	0	0	0	0	0	0	0	1	0	0	0	0	0	0	0	0	0	0	0	0
OTU_45	0	0	0	0	0	0	0	0	0	0	478	0	0	0	0	0	0	0	0	0	0	0
OTU_815	0	0	0	0	0	0	0	0	0	0	1	0	0	0	0	0	0	0	0	0	1	0
OTU_985	0	0	0	0	0	0	0	0	0	0	4	0	0	0	0	0	0	0	0	0	0	0
OTU_528	0	0	0	0	0	0	0	0	0	0	1	0	0	0	0	0	0	0	0	0	0	0
OTU_917	0	0	0	0	0	0	0	0	0	0	3	0	0	0	0	0	0	0	0	0	0	0
OTU_708	0	0	0	0	0	0	0	0	0	0	1	0	0	0	0	0	0	0	0	0	0	0
OTU_915	0	0	0	0	0	0	0	0	0	0	20	0	0	0	0	0	0	49	0	0	0	0
OTU_751	0	0	0	0	0	0	0	0	0	0	5	0	0	0	0	0	0	0	0	0	0	0
OTU_216	0	0	0	0	0	0	0	0	0	0	2	0	0	0	0	0	0	0	0	1	1	0
OTU_217	0	0	0	0	0	0	0	0	0	0	1	0	0	0	0	0	0	0	0	0	0	0
OTU_916	0	0	0	0	0	0	0	0	0	0	1	0	0	0	0	0	0	0	0	0	0	0
OTU_347	0	0	0	0	0	0	0	0	0	0	1	0	0	0	0	0	0	0	0	0	0	0
OTU_727	0	0	0	0	0	0	0	0	0	0	3	0	0	0	0	0	0	0	0	0	0	0
OTU_977	0	0	0	0	0	0	0	0	0	0	2	0	0	0	0	0	0	0	0	0	0	0
OTU_806	0	0	0	0	0	0	0	0	0	0	1	0	0	0	0	0	0	0	0	0	0	0
OTU_432	0	0	0	0	0	0	0	0	0	0	1	0	0	0	0	0	0	0	0	0	0	0
OTU_834	0	0	0	0	0	0	0	0	0	0	1	0	0	0	0	0	0	0	0	0	0	0
OTU_1067	0	0	0	0	0	0	0	0	0	0	1	0	0	0	0	0	0	0	0	0	0	0
OTU_498	0	0	0	0	0	0	0	0	0	0	0	0	0	0	0	0	0	1	0	0	0	0
OTU_471	0	0	0	0	0	0	0	0	0	0	0	0	0	0	0	0	0	1	0	0	0	0
OTU_1132	0	0	0	0	0	0	0	0	0	0	0	0	0	0	0	0	0	1	0	0	0	0
OTU_39	0	0	0	0	0	0	0	0	0	0	0	0	0	0	0	0	0	331	0	0	0	0
OTU_158	0	0	0	0	0	0	0	0	0	0	0	0	0	0	0	0	0	42	0	0	0	0
OTU_61	0	0	0	0	0	0	0	0	0	0	0	0	0	0	0	0	0	137	0	0	0	0
OTU_672	0	0	0	0	0	0	0	0	0	0	0	0	0	0	0	0	0	1	0	0	0	0
OTU_605	0	0	0	0	0	0	0	0	0	0	0	0	0	0	0	0	0	2	0	0	0	0
OTU_372	0	0	0	0	0	0	0	0	0	0	0	0	0	0	0	0	0	1	0	0	0	0
OTU_809	0	0	0	0	0	0	0	0	0	0	0	0	0	0	0	0	0	3	0	0	0	0
OTU_172	0	0	0	0	0	0	0	0	0	0	0	0	0	0	0	0	0	3	0	0	0	0
OTU_568	0	0	0	0	0	0	0	0	0	0	0	0	0	0	0	0	0	2	0	0	0	0
OTU_57	0	0	0	0	0	0	0	0	0	0	0	0	0	0	0	0	0	40	0	0	0	0
OTU_640	0	0	0	0	0	0	0	0	0	0	0	0	0	0	0	0	0	12	0	0	0	0
OTU_267	0	0	0	0	0	0	0	0	0	0	0	0	0	0	0	0	0	3	0	0	0	0
OTU_143	0	0	0	0	0	0	0	0	0	0	0	0	0	0	0	0	0	2	0	0	0	0
OTU_1029	0	0	0	0	0	0	0	0	0	0	0	0	0	0	0	0	0	1	0	0	0	0
OTU_1022	0	0	0	0	0	0	0	0	0	0	0	0	0	0	0	0	0	1	0	0	0	0
OTU_725	0	0	0	0	0	0	0	0	0	0	0	0	0	0	0	0	0	1	0	0	0	0
OTU_1057	0	0	0	0	0	0	0	0	0	0	0	0	0	0	0	0	0	2	0	0	0	0
OTU_474	0	0	0	0	0	0	0	0	0	0	0	0	0	0	0	0	0	1	0	0	0	0
OTU_511	0	0	0	0	0	0	0	0	0	0	0	0	0	0	0	0	0	1	0	0	0	0
OTU_904	0	0	0	0	0	0	0	0	0	0	0	0	0	0	0	0	0	1	0	0	0	0
OTU_874	0	0	0	0	0	0	0	0	0	0	0	0	0	0	0	0	0	1	0	0	0	0
OTU_633	0	0	0	0	0	0	0	0	0	0	0	0	0	0	0	0	0	4	0	0	0	0
OTU_600	0	0	0	0	0	0	0	0	0	0	0	0	0	0	0	0	0	2	0	0	0	0
OTU_810	0	0	0	0	0	0	0	0	0	0	0	0	0	0	0	0	0	1	0	0	0	0
OTU_151	0	0	0	0	0	0	0	0	0	0	0	0	0	0	0	0	0	3	0	0	0	0
OTU_980	0	0	0	0	0	0	0	0	0	0	0	0	0	0	0	0	0	2	0	0	0	0
OTU_218	0	0	0	0	0	0	0	0	0	0	0	0	0	0	0	0	0	1	0	0	0	0
OTU_905	0	0	0	0	0	0	0	0	0	0	0	0	0	0	0	0	0	2	0	0	0	0
OTU_858	0	0	0	0	0	0	0	0	0	0	0	0	0	0	0	0	0	1	0	0	0	0
OTU_538	0	0	0	0	0	0	0	0	0	0	0	0	0	0	0	0	0	1	0	0	0	0
OTU_726	0	0	0	0	0	0	0	0	0	0	0	0	0	0	0	0	0	1	0	0	0	0
OTU_501	0	0	0	0	0	0	0	0	0	0	0	0	0	0	0	0	0	2	0	0	0	0
OTU_601	0	0	0	0	0	0	0	0	0	0	0	0	0	0	0	0	0	1	0	0	0	0
OTU_1053	0	0	0	0	0	0	0	0	0	0	0	0	0	0	0	0	0	2	0	0	0	0
OTU_802	0	0	0	0	0	0	0	0	0	0	0	0	0	0	0	0	0	1	0	0	0	0
OTU_468	0	0	0	0	0	0	0	0	0	0	0	0	0	0	0	0	0	1	0	0	0	0
OTU_669	0	0	0	0	0	0	0	0	0	0	0	0	0	0	0	0	0	1	0	0	0	0
OTU_486	0	0	0	0	0	0	0	0	0	0	0	0	0	0	0	0	0	2	0	0	0	0
OTU_219	0	0	0	0	0	0	0	0	0	0	0	0	0	0	0	0	0	1	0	0	0	0
OTU_378	0	0	0	0	0	0	0	0	0	0	0	0	0	0	0	0	0	1	0	0	0	0
OTU_179	0	0	0	0	0	0	0	0	0	0	0	0	0	0	0	0	0	1	0	0	0	0
OTU_109	0	0	0	0	0	0	0	0	0	0	0	0	0	0	0	0	0	0	3	0	0	0
OTU_38	0	0	0	0	0	0	0	0	0	0	0	0	0	0	0	0	0	0	99	1	0	0
OTU_171	0	0	0	0	0	0	0	0	0	0	0	0	0	0	0	0	0	0	4	0	0	0
OTU_1027	0	0	0	0	0	0	0	0	0	0	0	0	0	0	0	0	0	0	1	0	0	0
OTU_928	0	0	0	0	0	0	0	0	0	0	0	0	0	0	0	0	0	0	2	0	0	0
OTU_557	0	0	0	0	0	0	0	0	0	0	0	0	0	0	0	0	0	0	1	0	0	0
OTU_835	0	0	0	0	0	0	0	0	0	0	0	0	0	0	0	0	0	0	1	0	0	0
OTU_1026	0	0	0	0	0	0	0	0	0	0	0	0	0	0	0	0	0	0	2	0	0	0
OTU_958	0	0	0	0	0	0	0	0	0	0	0	0	0	0	0	0	0	0	3	0	0	0
OTU_910	0	0	0	0	0	0	0	0	0	0	0	0	0	0	0	0	0	0	1	0	0	0
OTU_1123	0	0	0	0	0	0	0	0	0	0	0	0	0	0	0	0	0	0	1	0	0	0
OTU_602	0	0	0	0	0	0	0	0	0	0	0	0	0	0	0	0	0	0	1	0	0	0
OTU_935	0	0	0	0	0	0	0	0	0	0	0	0	0	0	0	0	0	0	1	0	0	0
OTU_1106	0	0	0	0	0	0	0	0	0	0	0	0	0	0	0	0	0	0	1	0	0	0
OTU_731	0	0	0	0	0	0	0	0	0	0	0	0	0	0	0	0	0	0	1	0	0	0
OTU_670	0	0	0	0	0	0	0	0	0	0	0	0	0	0	0	0	0	0	1	0	0	0
OTU_638	0	0	0	0	0	0	0	0	0	0	0	0	0	0	0	0	0	0	1	0	0	0
OTU_1037	0	0	0	0	0	0	0	0	0	0	0	0	0	0	0	0	0	0	1	0	0	0
OTU_369	0	0	0	0	0	0	0	0	0	0	0	0	0	0	0	0	0	0	1	0	0	0
OTU_918	0	0	0	0	0	0	0	0	0	0	0	0	0	0	0	0	0	0	1	0	0	0
OTU_836	0	0	0	0	0	0	0	0	0	0	0	0	0	0	0	0	0	0	1	0	0	0
OTU_709	0	0	0	0	0	0	0	0	0	0	0	0	0	0	0	0	0	0	1	0	0	0
OTU_124	0	0	0	0	0	0	0	0	0	0	0	0	0	0	0	0	0	0	0	20	0	0
OTU_101	0	0	0	0	0	0	0	0	0	0	0	0	0	0	0	0	0	0	0	28	0	0
OTU_223	0	0	0	0	0	0	0	0	0	0	0	0	0	0	0	0	0	0	0	2	0	0
OTU_142	0	0	0	0	0	0	0	0	0	0	0	0	0	0	0	0	0	0	0	44	0	0
OTU_192	0	0	0	0	0	0	0	0	0	0	0	0	0	0	0	0	0	0	0	2	0	0
OTU_222	0	0	0	0	0	0	0	0	0	0	0	0	0	0	0	0	0	0	0	1	3	0
OTU_801	0	0	0	0	0	0	0	0	0	0	0	0	0	0	0	0	0	0	0	1	0	0
OTU_666	0	0	0	0	0	0	0	0	0	0	0	0	0	0	0	0	0	0	0	1	0	0
OTU_551	0	0	0	0	0	0	0	0	0	0	0	0	0	0	0	0	0	0	0	3	0	0
OTU_371	0	0	0	0	0	0	0	0	0	0	0	0	0	0	0	0	0	0	0	1	0	0
OTU_550	0	0	0	0	0	0	0	0	0	0	0	0	0	0	0	0	0	0	0	1	0	0
OTU_665	0	0	0	0	0	0	0	0	0	0	0	0	0	0	0	0	0	0	0	2	0	0
OTU_695	0	0	0	0	0	0	0	0	0	0	0	0	0	0	0	0	0	0	0	1	0	0
OTU_912	0	0	0	0	0	0	0	0	0	0	0	0	0	0	0	0	0	0	0	2	0	0
OTU_865	0	0	0	0	0	0	0	0	0	0	0	0	0	0	0	0	0	0	0	1	0	0
OTU_442	0	0	0	0	0	0	0	0	0	0	0	0	0	0	0	0	0	0	0	1	0	0
OTU_1015	0	0	0	0	0	0	0	0	0	0	0	0	0	0	0	0	0	0	0	1	0	0
OTU_943	0	0	0	0	0	0	0	0	0	0	0	0	0	0	0	0	0	0	0	1	0	0
OTU_628	0	0	0	0	0	0	0	0	0	0	0	0	0	0	0	0	0	0	0	2	0	0
OTU_944	0	0	0	0	0	0	0	0	0	0	0	0	0	0	0	0	0	0	0	1	0	0
OTU_1038	0	0	0	0	0	0	0	0	0	0	0	0	0	0	0	0	0	0	0	3	0	0
OTU_663	0	0	0	0	0	0	0	0	0	0	0	0	0	0	0	0	0	0	0	1	0	0
OTU_535	0	0	0	0	0	0	0	0	0	0	0	0	0	0	0	0	0	0	0	1	0	0
OTU_225	0	0	0	0	0	0	0	0	0	0	0	0	0	0	0	0	0	0	0	1	0	0
OTU_1020	0	0	0	0	0	0	0	0	0	0	0	0	0	0	0	0	0	0	0	0	1	0
OTU_118	0	0	0	0	0	0	0	0	0	0	0	0	0	0	0	0	0	0	0	0	4	0
OTU_875	0	0	0	0	0	0	0	0	0	0	0	0	0	0	0	0	0	0	0	0	2	0
OTU_684	0	0	0	0	0	0	0	0	0	0	0	0	0	0	0	0	0	0	0	0	1	0
OTU_981	0	0	0	0	0	0	0	0	0	0	0	0	0	0	0	0	0	0	0	0	1	0
OTU_1052	0	0	0	0	0	0	0	0	0	0	0	0	0	0	0	0	0	0	0	0	1	0
OTU_489	0	0	0	0	0	0	0	0	0	0	0	0	0	0	0	0	0	0	0	0	1	0
OTU_614	0	0	0	0	0	0	0	0	0	0	0	0	0	0	0	0	0	0	0	0	1	0
OTU_163	0	0	0	0	0	0	0	0	0	0	0	0	0	0	0	0	0	0	0	0	6	0
OTU_533	0	0	0	0	0	0	0	0	0	0	0	0	0	0	0	0	0	0	0	0	1	0
OTU_319	0	0	0	0	0	0	0	0	0	0	0	0	0	0	0	0	0	0	0	0	1	0
OTU_859	0	0	0	0	0	0	0	0	0	0	0	0	0	0	0	0	0	0	0	0	1	0
OTU_534	0	0	0	0	0	0	0	0	0	0	0	0	0	0	0	0	0	0	0	0	1	0
OTU_1104	0	0	0	0	0	0	0	0	0	0	0	0	0	0	0	0	0	0	0	0	1	0
OTU_209	0	0	0	0	0	0	0	0	0	0	0	0	0	0	0	0	0	0	0	0	1	0

## Sheet: Taxonomy_Information
OTUId	Domain	Phylum	Class	Order	Family	Genus	Species	G3F50	G3F200	G3F1000	G3F2000	G3F3000	G3F4000	G3P50	G3P1000	G3P200	G3P2000	G3P4000	J5F50	J5F200	J5F1000	J5F2000	J5F3000	J5F4000	J5P50	J5P200	J5P1000	J5P2000	J5P3000
OTU_1	Archaea	Euryarchaeota	Thermoplasmata	Thermoplasmatales	Marine Group II	uncultured marine group II euryarchaeote HF500_30A08	uncultured marine group II euryarchaeote HF500_30A08	17	115	319	811	409	420	4	725	36	42	1160	36	206	1031	1	151	39	0	9	258	367	0
OTU_10	Archaea	Euryarchaeota	Thermoplasmata	Thermoplasmatales	Marine Group II	uncultured marine group II euryarchaeote HF130_27A09	uncultured marine group II euryarchaeote HF130_27A09	868	8	13	0	0	1	489	51	0	0	0	304	10	8	0	0	0	0	0	2	0	0
OTU_100	Archaea	Euryarchaeota	Thermoplasmata	Thermoplasmatales	Marine Group III	uncultured marine group III euryarchaeote HF130_95B02	uncultured marine group III euryarchaeote HF130_95B02	464	114	195	32	38	46	274	852	0	0	0	126	87	113	0	14	31	0	1	145	0	0
OTU_1000	Archaea	Woesearchaeota (DHVEG-6)	uncultured archaeon	uncultured archaeon	uncultured archaeon	uncultured archaeon	uncultured archaeon	0	0	0	0	0	1	0	0	0	0	0	0	0	0	0	0	0	0	0	0	0	0
OTU_1001	Archaea	Euryarchaeota	Thermoplasmata	Thermoplasmatales	Marine Group II	uncultured marine group II euryarchaeote HF500_30A08	uncultured marine group II euryarchaeote HF500_30A08	0	1	3	3	0	2	0	1	1	0	4	0	3	3	0	0	0	0	0	4	3	0
OTU_1002	Archaea	Euryarchaeota	Thermoplasmata	Thermoplasmatales	Marine Group III	uncultured marine archaeon	uncultured marine archaeon	0	0	0	0	0	0	0	1	0	0	0	0	0	0	0	0	0	0	0	0	0	0
OTU_1003	Archaea	Euryarchaeota	Thermoplasmata	Thermoplasmatales	Marine Group III	uncultured euryarchaeote	uncultured euryarchaeote	0	0	0	0	0	0	0	4	0	0	0	0	0	0	0	0	0	0	0	0	0	0
OTU_1004	Archaea	Euryarchaeota	Thermoplasmata	Thermoplasmatales	Marine Group III	uncultured marine archaeon	uncultured marine archaeon	0	0	11	0	5	3	0	22	0	0	0	0	2	1	0	2	2	0	1	4	0	0
OTU_1005	Archaea	Euryarchaeota	Thermoplasmata	Thermoplasmatales	Marine Group III	uncultured marine archaeon	uncultured marine archaeon	0	1	16	8	12	32	0	141	0	0	0	0	2	9	0	3	1	0	0	16	0	0
OTU_1006	Archaea	Thaumarchaeota	Marine Group I	Unclassified	Unclassified	Unclassified	Unclassified	0	0	0	0	0	0	0	0	0	1	0	0	0	2	2	0	0	0	2	0	0	0
OTU_1007	Archaea	Euryarchaeota	Thermoplasmata	Thermoplasmatales	Marine Group II	Unclassified	Unclassified	0	1	0	0	0	0	0	0	0	0	0	0	1	1	0	0	0	0	0	0	0	0
OTU_1008	Archaea	Euryarchaeota	Thermoplasmata	Thermoplasmatales	Marine Group II	Unclassified	Unclassified	0	0	0	0	0	0	0	0	0	0	0	0	0	1	0	0	0	0	0	0	0	0
OTU_1009	Archaea	Euryarchaeota	Thermoplasmata	Thermoplasmatales	Marine Group II	uncultured marine group II euryarchaeote HF130_27A09	uncultured marine group II euryarchaeote HF130_27A09	0	0	0	0	0	0	0	0	0	0	0	0	0	1	0	0	0	0	0	0	0	0
OTU_101	Unclassified	Unclassified	Unclassified	Unclassified	Unclassified	Unclassified	Unclassified	0	0	0	0	0	0	0	0	0	0	0	0	0	0	0	0	0	0	0	28	0	0
OTU_1010	Archaea	Euryarchaeota	Thermoplasmata	Thermoplasmatales	Marine Group II	uncultured marine group II euryarchaeote HF70_91G08	uncultured marine group II euryarchaeote HF70_91G08	1	1	0	4	1	2	2	3	0	0	1	8	1	0	0	0	0	0	0	0	1	0
OTU_1011	Archaea	Thaumarchaeota	Marine Group I	Unclassified	Unclassified	Unclassified	Unclassified	0	0	1	0	0	0	0	0	0	0	0	0	0	0	0	0	0	0	0	0	0	0
OTU_1012	Archaea	Woesearchaeota (DHVEG-6)	uncultured euryarchaeote	uncultured euryarchaeote	uncultured euryarchaeote	uncultured euryarchaeote	uncultured euryarchaeote	0	0	0	1	0	0	0	0	0	0	0	0	0	0	0	0	0	0	0	0	0	0
OTU_1013	Archaea	Euryarchaeota	Thermoplasmata	Thermoplasmatales	Marine Group III	uncultured marine archaeon	uncultured marine archaeon	4	155	183	29	48	90	0	886	0	0	0	4	171	83	0	27	35	0	4	558	0	0
OTU_1014	Archaea	Euryarchaeota	Thermoplasmata	Thermoplasmatales	Marine Group II	uncultured marine microorganism HF200_10-06-02	uncultured marine microorganism HF200_10-06-02	0	11	0	0	3	3	0	0	0	0	1	2	7	0	0	2	0	0	0	1	0	0
OTU_1015	Archaea	Woesearchaeota (DHVEG-6)	uncultured archaeon	uncultured archaeon	uncultured archaeon	uncultured archaeon	uncultured archaeon	0	0	0	0	0	0	0	0	0	0	0	0	0	0	0	0	0	0	0	1	0	0
OTU_1016	Archaea	Thaumarchaeota	Marine Benthic Group A	uncultured marine archaeon	uncultured marine archaeon	uncultured marine archaeon	uncultured marine archaeon	0	0	2	0	1	0	0	0	1	0	0	0	0	0	0	0	0	0	0	0	0	0
OTU_1017	Archaea	Woesearchaeota (DHVEG-6)	uncultured archaeon	uncultured archaeon	uncultured archaeon	uncultured archaeon	uncultured archaeon	0	0	0	0	0	1	0	0	0	0	0	0	0	0	0	0	0	0	0	0	0	0
OTU_1018	Archaea	Thaumarchaeota	Marine Group I	Unclassified	Unclassified	Unclassified	Unclassified	0	4	5	4	1	2	0	3	0	2	3	0	1	0	0	0	0	0	0	0	1	3
OTU_1019	Archaea	Euryarchaeota	Thermoplasmata	Thermoplasmatales	Marine Group II	uncultured marine group II euryarchaeote HF500_30A08	uncultured marine group II euryarchaeote HF500_30A08	0	0	4	0	0	0	0	0	0	0	2	0	0	0	0	0	0	0	0	2	1	0
OTU_102	Archaea	Euryarchaeota	Methanomicrobia	Methanosarcinales	Methanosaetaceae	Methanosaeta	uncultured Methanosarcinales archaeon	0	0	0	0	0	0	0	0	0	5	125	0	0	0	0	0	0	1806	0	2	0	7
OTU_1020	Archaea	Woesearchaeota (DHVEG-6)	uncultured euryarchaeote	uncultured euryarchaeote	uncultured euryarchaeote	uncultured euryarchaeote	uncultured euryarchaeote	0	0	0	0	0	0	0	0	0	0	0	0	0	0	0	0	0	0	0	0	1	0
OTU_1021	Archaea	Thaumarchaeota	Marine Group I	Unknown Order	Unknown Family	Candidatus Nitrosopelagicus	uncultured marine archaeon	1	0	0	0	0	0	0	0	0	0	0	0	0	0	0	0	0	0	0	0	0	0
OTU_1022	Archaea	Woesearchaeota (DHVEG-6)	uncultured euryarchaeote	uncultured euryarchaeote	uncultured euryarchaeote	uncultured euryarchaeote	uncultured euryarchaeote	0	0	0	0	0	0	0	0	0	0	0	0	0	0	0	0	0	1	0	0	0	0
OTU_1023	Archaea	Thaumarchaeota	Marine Group I	Marine Group I thaumarchaeote SCGC AAA799-D07	Marine Group I thaumarchaeote SCGC AAA799-D07	Marine Group I thaumarchaeote SCGC AAA799-D07	Marine Group I thaumarchaeote SCGC AAA799-D07	0	3	4	1	2	1	0	1	2	1	1	1	2	1	0	0	0	0	4	0	4	2
OTU_1024	Archaea	Thaumarchaeota	Marine Group I	Unknown Order	Unknown Family	Unclassified	Unclassified	0	0	0	0	0	0	0	0	4	1	0	0	2	0	0	0	0	0	1	0	0	0
OTU_1025	Archaea	Thaumarchaeota	Sc-EA05	uncultured archaeon	uncultured archaeon	uncultured archaeon	uncultured archaeon	0	1	0	0	0	0	0	0	0	0	0	0	0	0	0	0	0	0	0	0	0	0
OTU_1026	Archaea	Woesearchaeota (DHVEG-6)	uncultured euryarchaeote	uncultured euryarchaeote	uncultured euryarchaeote	uncultured euryarchaeote	uncultured euryarchaeote	0	0	0	0	0	0	0	0	0	0	0	0	0	0	0	0	0	0	2	0	0	0
OTU_1027	Archaea	Euryarchaeota	Methanobacteria	Methanobacteriales	Methanobacteriaceae	Methanobrevibacter	uncultured euryarchaeote	0	0	0	0	0	0	0	0	0	0	0	0	0	0	0	0	0	0	1	0	0	0
OTU_1028	Archaea	Thaumarchaeota	Marine Benthic Group A	uncultured marine archaeon	uncultured marine archaeon	uncultured marine archaeon	uncultured marine archaeon	0	0	0	0	0	0	0	0	1	0	0	0	0	0	0	0	0	0	2	0	0	0
OTU_1029	Archaea	Euryarchaeota	Methanomicrobia	Methanosarcinales	Methanosaetaceae	Methanosaeta	Unclassified	0	0	0	0	0	0	0	0	0	0	0	0	0	0	0	0	0	1	0	0	0	0
OTU_103	Archaea	Euryarchaeota	Thermoplasmata	Thermoplasmatales	Marine Group II	uncultured marine group II euryarchaeote	uncultured marine group II euryarchaeote	1	0	0	0	1	11	0	4	0	0	0	1	0	4	1	1	1	0	0	0	0	0
OTU_1030	Archaea	Thaumarchaeota	Marine Group I	Unclassified	Unclassified	Unclassified	Unclassified	0	0	0	0	0	0	0	0	0	0	0	0	0	0	9	0	0	0	0	0	0	0
OTU_1031	Archaea	Thaumarchaeota	Marine Group I	Unclassified	Unclassified	Unclassified	Unclassified	0	0	0	0	0	0	0	0	0	0	0	0	0	0	1	0	0	0	0	0	0	0
OTU_1032	Archaea	Thaumarchaeota	Marine Group I	uncultured marine archaeon	uncultured marine archaeon	uncultured marine archaeon	uncultured marine archaeon	0	0	1	0	0	0	0	0	0	0	0	0	1	1	0	0	0	0	0	0	0	0
OTU_1033	Archaea	Unclassified	Unclassified	Unclassified	Unclassified	Unclassified	Unclassified	0	0	0	0	0	0	0	0	0	0	0	0	0	0	0	0	0	0	0	0	0	2
OTU_1034	Archaea	Euryarchaeota	Methanomicrobia	Methanosarcinales	Methanosaetaceae	Methanosaeta	uncultured Methanosarcinales archaeon	0	0	0	0	0	0	0	0	0	1	0	0	0	0	0	0	0	0	0	0	0	0
OTU_1035	Archaea	Thaumarchaeota	Marine Group I	Unclassified	Unclassified	Unclassified	Unclassified	0	0	0	1	0	0	0	0	0	2	0	0	0	0	0	1	0	0	2	0	0	0
OTU_1036	Archaea	Euryarchaeota	Thermoplasmata	Thermoplasmatales	Marine Group II	Unclassified	Unclassified	0	0	0	1	0	0	0	1	0	0	10	0	0	0	0	0	0	0	0	1	1	0
OTU_1037	Archaea	Thaumarchaeota	Marine Group I	Unclassified	Unclassified	Unclassified	Unclassified	0	0	0	0	0	0	0	0	0	0	0	0	0	0	0	0	0	0	1	0	0	0
OTU_1038	Archaea	Euryarchaeota	Thermoplasmata	Thermoplasmatales	Marine Group II	uncultured marine group II euryarchaeote HF500_30A08	uncultured marine group II euryarchaeote HF500_30A08	0	0	0	0	0	0	0	0	0	0	0	0	0	0	0	0	0	0	0	3	0	0
OTU_1039	Archaea	Thaumarchaeota	Marine Group I	Unclassified	Unclassified	Unclassified	Unclassified	0	0	0	0	0	0	0	0	0	0	0	0	0	0	1	0	0	0	0	0	0	0
OTU_104	Archaea	Woesearchaeota (DHVEG-6)	uncultured bacterium	uncultured bacterium	uncultured bacterium	uncultured bacterium	uncultured bacterium	0	0	0	0	0	0	0	42	0	0	0	0	0	0	0	0	0	0	1	33	0	0
OTU_1040	Archaea	Thaumarchaeota	Marine Group I	Unclassified	Unclassified	Unclassified	Unclassified	0	0	0	0	0	0	0	0	0	0	0	0	0	0	1	1	0	0	0	0	0	0
OTU_1041	Archaea	Thaumarchaeota	Marine Group I	Unknown Order	Unknown Family	Candidatus Nitrosopelagicus	marine metagenome	0	0	0	0	0	0	0	0	0	0	0	1	0	0	0	0	0	0	0	0	0	0
OTU_1042	Archaea	Euryarchaeota	Thermoplasmata	Thermoplasmatales	Marine Group II	uncultured marine group II euryarchaeote HF10_36B02	uncultured marine group II euryarchaeote HF10_36B02	6	0	0	0	0	0	3	0	0	0	0	1	0	0	4	0	0	0	0	1	0	0
OTU_1043	Archaea	Aenigmarchaeota	Deep Sea Euryarchaeotic Group(DSEG)	uncultured archaeon	uncultured archaeon	uncultured archaeon	uncultured archaeon	0	0	0	0	0	1	0	0	0	0	0	0	0	0	0	0	0	0	0	0	0	0
OTU_1044	Archaea	Euryarchaeota	Thermoplasmata	Thermoplasmatales	Marine Group III	uncultured marine archaeon	uncultured marine archaeon	0	0	0	0	0	1	0	0	0	0	0	0	0	0	0	0	0	0	0	0	0	0
OTU_1045	Archaea	Woesearchaeota (DHVEG-6)	uncultured euryarchaeote	uncultured euryarchaeote	uncultured euryarchaeote	uncultured euryarchaeote	uncultured euryarchaeote	0	0	0	0	0	1	0	0	0	0	0	0	0	0	0	0	0	0	0	0	0	0
OTU_1046	Archaea	Euryarchaeota	Thermoplasmata	Thermoplasmatales	Marine Group III	uncultured marine archaeon	uncultured marine archaeon	0	0	0	0	0	1	0	0	0	0	0	0	0	0	0	0	0	0	0	0	0	0
OTU_1047	Unclassified	Unclassified	Unclassified	Unclassified	Unclassified	Unclassified	Unclassified	0	0	0	0	0	0	1	0	0	0	0	0	0	0	0	0	0	0	0	0	0	0
OTU_1048	Archaea	Thaumarchaeota	Marine Group I	Unknown Order	Unknown Family	Unclassified	Unclassified	0	0	0	0	0	0	0	0	0	0	0	0	1	0	0	0	0	0	0	0	0	0
OTU_1049	Archaea	Euryarchaeota	Thermoplasmata	Thermoplasmatales	Marine Group II	uncultured marine group II euryarchaeote	uncultured marine group II euryarchaeote	0	0	0	0	0	0	0	1	0	0	0	0	0	0	0	0	0	0	0	0	0	0
OTU_105	Archaea	Euryarchaeota	Thermoplasmata	Thermoplasmatales	Marine Group II	Unclassified	Unclassified	0	1	1	0	2	0	0	0	0	0	0	0	0	7	0	1	1	0	0	0	0	0
OTU_1050	Archaea	Euryarchaeota	Thermoplasmata	Thermoplasmatales	Marine Group II	uncultured marine microorganism HF200_10-06-02	uncultured marine microorganism HF200_10-06-02	0	0	0	0	0	0	0	0	0	0	0	0	2	0	0	0	0	0	0	0	0	0
OTU_1051	Archaea	Thaumarchaeota	Marine Group I	Unknown Order	Unknown Family	Candidatus Nitrosopelagicus	Unclassified	0	0	0	0	0	0	0	0	0	1	0	0	0	0	0	0	0	1	0	0	0	0
OTU_1052	Archaea	Thaumarchaeota	Marine Group I	Unclassified	Unclassified	Unclassified	Unclassified	0	0	0	0	0	0	0	0	0	0	0	0	0	0	0	0	0	0	0	0	1	0
OTU_1053	Archaea	Thaumarchaeota	Marine Group I	Unknown Order	Unknown Family	Candidatus Nitrosopelagicus	marine metagenome	0	0	0	0	0	0	0	0	0	0	0	0	0	0	0	0	0	2	0	0	0	0
OTU_1054	Archaea	Thaumarchaeota	Marine Group I	Unclassified	Unclassified	Unclassified	Unclassified	0	0	0	0	0	0	0	0	0	2	0	0	0	0	0	0	0	0	1	0	0	2
OTU_1055	Archaea	Euryarchaeota	Thermoplasmata	Thermoplasmatales	Marine Group III	uncultured marine archaeon	uncultured marine archaeon	0	0	0	0	0	0	0	1	0	0	0	0	0	0	0	0	0	0	0	0	0	0
OTU_1056	Archaea	Thaumarchaeota	Unclassified	Unclassified	Unclassified	Unclassified	Unclassified	0	0	1	1	0	0	0	1	0	0	0	0	0	0	0	0	0	0	1	0	0	0
OTU_1057	Archaea	Euryarchaeota	Methanomicrobia	Methanosarcinales	Methanosaetaceae	Methanosaeta	Unclassified	0	0	0	0	0	0	0	0	0	0	0	0	0	0	0	0	0	2	0	0	0	0
OTU_1058	Archaea	Euryarchaeota	Thermoplasmata	Thermoplasmatales	Marine Group III	uncultured marine archaeon	uncultured marine archaeon	0	2	0	0	0	0	0	0	0	0	0	0	0	0	0	0	0	0	0	0	0	0
OTU_1059	Archaea	Thaumarchaeota	Marine Group I	Unclassified	Unclassified	Unclassified	Unclassified	0	0	0	0	0	0	0	0	1	2	0	0	0	0	0	0	0	0	0	0	0	0
OTU_106	Archaea	Euryarchaeota	Thermoplasmata	Thermoplasmatales	Marine Group II	Unclassified	Unclassified	0	3	2	24	75	71	0	0	0	0	6	0	0	16	39	32	73	0	0	0	1	0
OTU_1060	Archaea	Euryarchaeota	Thermoplasmata	Thermoplasmatales	Marine Group III	uncultured marine group III euryarchaeote HF10_21C05	uncultured marine group III euryarchaeote HF10_21C05	2	0	0	0	0	0	0	0	0	0	0	0	0	0	0	0	0	0	0	0	0	0
OTU_1061	Archaea	Euryarchaeota	Thermoplasmata	Thermoplasmatales	Marine Group II	uncultured marine group II euryarchaeote HF130_27A09	uncultured marine group II euryarchaeote HF130_27A09	1	0	0	0	0	0	0	0	0	0	0	0	0	0	0	0	0	0	0	0	0	0
OTU_1062	Archaea	Euryarchaeota	Thermoplasmata	Thermoplasmatales	Marine Group III	uncultured marine archaeon	uncultured marine archaeon	0	0	2	0	4	1	0	9	0	0	0	0	0	2	0	0	1	0	0	2	0	0
OTU_1063	Archaea	Euryarchaeota	Thermoplasmata	Thermoplasmatales	Marine Group II	Unclassified	Unclassified	0	0	0	0	0	0	0	0	0	0	0	0	0	2	0	0	0	0	0	0	0	0
OTU_1064	Archaea	Euryarchaeota	Thermoplasmata	Thermoplasmatales	Marine Group II	uncultured marine group II euryarchaeote HF200_89A11	uncultured marine group II euryarchaeote HF200_89A11	4	0	0	0	0	0	0	0	0	0	0	2	0	0	0	0	0	0	0	0	0	0
OTU_1065	Archaea	Euryarchaeota	Thermoplasmata	Thermoplasmatales	Marine Group II	Unclassified	Unclassified	0	0	1	0	0	1	0	0	0	0	4	2	1	3	0	1	0	0	0	3	0	0
OTU_1066	Archaea	Thaumarchaeota	Marine Group I	Unclassified	Unclassified	Unclassified	Unclassified	0	0	0	0	0	0	0	0	0	1	0	0	0	0	0	0	0	0	0	0	0	0
OTU_1067	Bacteria	Unclassified	Unclassified	Unclassified	Unclassified	Unclassified	Unclassified	0	0	0	0	0	0	0	0	0	0	1	0	0	0	0	0	0	0	0	0	0	0
OTU_1068	Archaea	Euryarchaeota	Thermoplasmata	Thermoplasmatales	Marine Group III	uncultured marine group III euryarchaeote HF10_21C05	uncultured marine group III euryarchaeote HF10_21C05	8	0	0	0	0	1	7	0	0	0	0	8	0	0	0	0	0	0	0	9	0	0
OTU_1069	Archaea	Euryarchaeota	Thermoplasmata	Thermoplasmatales	Marine Group III	uncultured marine group III euryarchaeote HF10_21C05	uncultured marine group III euryarchaeote HF10_21C05	19	0	0	0	0	0	9	0	0	0	0	2	0	0	0	0	0	0	0	1	0	0
OTU_107	Archaea	Euryarchaeota	Thermoplasmata	Thermoplasmatales	Marine Group II	uncultured marine group II euryarchaeote	uncultured marine group II euryarchaeote	0	2	0	0	0	0	0	11	0	0	0	0	2	0	0	0	0	0	0	0	0	0
OTU_1070	Archaea	Thaumarchaeota	Marine Group I	Unknown Order	Unknown Family	Candidatus Nitrosopelagicus	marine metagenome	0	0	0	0	0	0	4	0	1	0	0	8	0	0	0	0	0	2	0	0	0	0
OTU_1071	Archaea	Euryarchaeota	Thermoplasmata	Thermoplasmatales	Marine Group II	uncultured marine group II euryarchaeote HF130_27A09	uncultured marine group II euryarchaeote HF130_27A09	64	0	0	0	0	0	20	0	0	0	0	33	0	0	0	0	0	0	0	0	0	0
OTU_1072	Archaea	Euryarchaeota	Thermoplasmata	Thermoplasmatales	Marine Group II	uncultured marine microorganism HF200_10-06-02	uncultured marine microorganism HF200_10-06-02	0	2	0	0	1	0	0	0	2	0	0	0	0	0	0	0	0	0	0	0	0	0
OTU_1073	Archaea	Thaumarchaeota	Marine Group I	Unclassified	Unclassified	Unclassified	Unclassified	0	0	0	0	0	0	0	0	0	0	0	0	1	0	0	0	0	0	0	0	0	0
OTU_1074	Archaea	Thaumarchaeota	Marine Group I	Unknown Order	Unknown Family	Candidatus Nitrosopelagicus	marine metagenome	0	0	0	0	0	0	0	0	0	0	0	3	0	0	0	0	0	0	0	0	0	0
OTU_1075	Archaea	Thaumarchaeota	Marine Group I	Unclassified	Unclassified	Unclassified	Unclassified	0	0	0	0	0	0	0	0	0	1	0	0	0	0	0	0	0	0	0	0	0	0
OTU_1076	Archaea	Euryarchaeota	Thermoplasmata	Thermoplasmatales	Marine Group II	uncultured marine group II euryarchaeote HF70_91G08	uncultured marine group II euryarchaeote HF70_91G08	0	0	4	1	5	10	0	1	0	0	10	0	0	1	1	5	151	0	0	0	7	0
OTU_1077	Archaea	Thaumarchaeota	Marine Group I	Unclassified	Unclassified	Unclassified	Unclassified	0	0	0	0	0	0	0	0	0	0	0	0	0	0	0	1	0	0	0	0	0	0
OTU_1078	Archaea	Euryarchaeota	Thermoplasmata	Thermoplasmatales	Marine Group II	uncultured marine microorganism HF200_10-06-02	uncultured marine microorganism HF200_10-06-02	0	0	0	0	1	0	0	0	3	0	0	0	1	0	0	0	0	0	2	0	2	0
OTU_1079	Archaea	Thaumarchaeota	Marine Group I	Unclassified	Unclassified	Unclassified	Unclassified	0	0	0	0	0	0	0	0	0	1	0	0	0	0	0	0	0	0	0	0	0	1
OTU_108	Archaea	Woesearchaeota (DHVEG-6)	uncultured euryarchaeote	uncultured euryarchaeote	uncultured euryarchaeote	uncultured euryarchaeote	uncultured euryarchaeote	0	0	0	5	2	0	0	0	0	0	0	0	0	0	3	10	3	0	0	0	0	0
OTU_1080	Archaea	Thaumarchaeota	Marine Group I	Unclassified	Unclassified	Unclassified	Unclassified	0	0	0	0	0	0	0	0	0	0	0	0	0	0	0	0	0	0	0	0	0	1
OTU_1081	Archaea	Euryarchaeota	Methanomicrobia	Methanosarcinales	Methanosaetaceae	Methanosaeta	uncultured methanogenic archaeon	0	0	0	0	0	0	0	0	0	0	0	0	0	0	0	0	0	0	0	0	0	1
OTU_1082	Unclassified	Unclassified	Unclassified	Unclassified	Unclassified	Unclassified	Unclassified	1	0	0	0	0	0	0	0	0	0	0	0	0	0	0	0	0	0	0	0	0	0
OTU_1083	Archaea	Thaumarchaeota	F9P122000-Arc-2-E02	uncultured marine archaeon	uncultured marine archaeon	uncultured marine archaeon	uncultured marine archaeon	0	0	1	0	0	0	0	0	0	0	0	0	0	0	0	0	0	0	0	0	0	0
OTU_1084	Unclassified	Unclassified	Unclassified	Unclassified	Unclassified	Unclassified	Unclassified	0	0	0	0	0	0	0	0	0	0	0	1	0	0	0	0	0	0	0	0	0	0
OTU_1085	Archaea	Thaumarchaeota	Marine Benthic Group A	uncultured marine group I thaumarchaeote	uncultured marine group I thaumarchaeote	uncultured marine group I thaumarchaeote	uncultured marine group I thaumarchaeote	0	4	0	0	0	0	0	0	6	2	5	0	2	2	0	0	0	0	0	0	0	2
OTU_1086	Archaea	Thaumarchaeota	Marine Group I	uncultured thaumarchaeote	uncultured thaumarchaeote	uncultured thaumarchaeote	uncultured thaumarchaeote	0	0	0	0	0	0	0	0	0	0	0	0	0	1	0	0	0	0	0	0	0	0
OTU_1087	Archaea	Thaumarchaeota	Unclassified	Unclassified	Unclassified	Unclassified	Unclassified	0	0	0	0	0	0	0	0	0	1	0	0	0	0	0	0	0	0	0	0	0	0
OTU_1088	Archaea	Woesearchaeota (DHVEG-6)	uncultured euryarchaeote	uncultured euryarchaeote	uncultured euryarchaeote	uncultured euryarchaeote	uncultured euryarchaeote	0	0	0	0	0	1	0	0	0	0	0	0	0	0	0	0	0	0	0	0	0	0
OTU_1089	Archaea	Euryarchaeota	Thermoplasmata	Thermoplasmatales	Marine Group II	uncultured marine group II euryarchaeote HF70_91G08	uncultured marine group II euryarchaeote HF70_91G08	0	0	0	1	0	0	0	0	0	0	0	0	0	0	0	0	1	0	0	0	0	0
OTU_109	Unclassified	Unclassified	Unclassified	Unclassified	Unclassified	Unclassified	Unclassified	0	0	0	0	0	0	0	0	0	0	0	0	0	0	0	0	0	0	3	0	0	0
OTU_1090	Archaea	Thaumarchaeota	Marine Benthic Group A	uncultured marine group I thaumarchaeote	uncultured marine group I thaumarchaeote	uncultured marine group I thaumarchaeote	uncultured marine group I thaumarchaeote	0	0	0	2	2	1	0	0	2	0	27	0	0	0	0	0	1	0	0	0	7	32
OTU_1091	Archaea	Woesearchaeota (DHVEG-6)	uncultured archaeon	uncultured archaeon	uncultured archaeon	uncultured archaeon	uncultured archaeon	0	0	0	0	0	1	0	0	0	0	0	0	0	0	0	0	0	0	0	0	0	0
OTU_1092	Archaea	Thaumarchaeota	Marine Group I	Unknown Order	Unknown Family	Candidatus Nitrosopelagicus	unidentified archaeon PM7	0	0	0	0	0	0	0	0	1	0	0	0	0	0	0	0	0	0	1	0	0	0
OTU_1093	Archaea	Euryarchaeota	Thermoplasmata	Thermoplasmatales	Marine Group II	uncultured marine group II euryarchaeote HF500_30A08	uncultured marine group II euryarchaeote HF500_30A08	1	1	3	5	0	1	0	4	0	0	14	1	4	0	0	0	0	0	0	6	6	0
OTU_1094	Archaea	Unclassified	Unclassified	Unclassified	Unclassified	Unclassified	Unclassified	0	0	0	0	0	0	0	0	0	0	0	0	0	0	0	1	0	0	0	0	0	0
OTU_1095	Archaea	Thaumarchaeota	Marine Group I	uncultured marine archaeon	uncultured marine archaeon	uncultured marine archaeon	uncultured marine archaeon	0	0	0	0	0	0	0	0	0	0	0	0	0	5	34	26	5	0	0	0	0	0
OTU_1096	Unclassified	Unclassified	Unclassified	Unclassified	Unclassified	Unclassified	Unclassified	0	0	0	0	0	0	0	0	0	0	1	0	0	0	0	0	0	0	0	0	0	2
OTU_1097	Archaea	Thaumarchaeota	Marine Group I	Unclassified	Unclassified	Unclassified	Unclassified	0	0	1	5	0	4	0	0	0	1	5	0	0	0	0	1	0	0	0	0	1	7
OTU_1098	Archaea	Thaumarchaeota	Marine Group I	uncultured marine archaeon	uncultured marine archaeon	uncultured marine archaeon	uncultured marine archaeon	1	0	4	13	9	17	0	6	3	14	29	0	1	2	0	4	5	0	2	0	14	57
OTU_1099	Archaea	Thaumarchaeota	Marine Group I	Unclassified	Unclassified	Unclassified	Unclassified	0	21	78	209	173	111	0	29	5	71	324	0	18	43	57	73	44	0	15	6	77	203
OTU_11	Archaea	Thaumarchaeota	Marine Benthic Group A	uncultured marine group I thaumarchaeote	uncultured marine group I thaumarchaeote	uncultured marine group I thaumarchaeote	uncultured marine group I thaumarchaeote	0	12	1	0	1	0	0	0	435	7	24	0	5	0	0	1	4	0	58	0	3	10
OTU_110	Archaea	Thaumarchaeota	pSL12	uncultured marine crenarchaeote AD1000-23-H12	uncultured marine crenarchaeote AD1000-23-H12	uncultured marine crenarchaeote AD1000-23-H12	uncultured marine crenarchaeote AD1000-23-H12	0	5	4	0	0	0	0	0	0	0	0	0	2	4	0	0	4	0	0	0	0	0
OTU_1100	Archaea	Thaumarchaeota	Unclassified	Unclassified	Unclassified	Unclassified	Unclassified	0	1	1	1	0	0	0	0	0	0	0	0	0	0	0	0	0	0	0	0	0	0
OTU_1101	Archaea	Euryarchaeota	Thermoplasmata	Thermoplasmatales	Marine Group II	uncultured marine microorganism HF200_10-06-02	uncultured marine microorganism HF200_10-06-02	0	1	0	0	0	0	0	0	0	0	0	0	0	0	0	0	0	0	0	0	0	0
OTU_1102	Archaea	Thaumarchaeota	Marine Group I	Unclassified	Unclassified	Unclassified	Unclassified	0	0	0	0	0	0	0	1	0	0	0	0	0	0	0	0	0	0	0	0	0	0
OTU_1103	Archaea	Thaumarchaeota	Marine Group I	Unclassified	Unclassified	Unclassified	Unclassified	0	2	1	0	0	0	0	0	0	0	0	0	0	0	0	0	0	0	0	0	0	0
OTU_1104	Unclassified	Unclassified	Unclassified	Unclassified	Unclassified	Unclassified	Unclassified	0	0	0	0	0	0	0	0	0	0	0	0	0	0	0	0	0	0	0	0	1	0
OTU_1105	Archaea	Euryarchaeota	Thermoplasmata	Thermoplasmatales	Marine Group III	uncultured marine archaeon	uncultured marine archaeon	0	0	0	0	0	0	0	1	0	0	0	0	0	0	0	0	0	0	0	0	0	0
OTU_1106	Archaea	Thaumarchaeota	Marine Benthic Group A	uncultured marine group I thaumarchaeote	uncultured marine group I thaumarchaeote	uncultured marine group I thaumarchaeote	uncultured marine group I thaumarchaeote	0	0	0	0	0	0	0	0	0	0	0	0	0	0	0	0	0	0	1	0	0	0
OTU_1107	Archaea	Thaumarchaeota	Marine Group I	Unclassified	Unclassified	Unclassified	Unclassified	0	0	0	0	0	0	0	0	0	0	0	0	0	16	55	44	12	0	0	0	0	0
OTU_1108	Archaea	Unclassified	Unclassified	Unclassified	Unclassified	Unclassified	Unclassified	0	0	0	0	0	0	0	0	0	0	0	0	0	0	0	1	0	0	0	0	0	0
OTU_1109	Archaea	Thaumarchaeota	Marine Group I	Unknown Order	Unknown Family	Candidatus Nitrosopelagicus	uncultured thaumarchaeote	2	1	0	0	0	0	17	0	1	2	0	17	2	0	1	5	0	12	3	0	0	0
OTU_111	Archaea	Thaumarchaeota	Marine Benthic Group A	uncultured archaeon	uncultured archaeon	uncultured archaeon	uncultured archaeon	0	0	3	0	0	0	0	0	0	0	0	0	0	10	0	0	0	0	0	0	0	0
OTU_1110	Archaea	Woesearchaeota (DHVEG-6)	uncultured euryarchaeote	uncultured euryarchaeote	uncultured euryarchaeote	uncultured euryarchaeote	uncultured euryarchaeote	0	0	0	0	0	0	0	0	0	0	0	0	0	0	0	1	0	0	0	0	0	0
OTU_1111	Archaea	Euryarchaeota	Thermoplasmata	Thermoplasmatales	Marine Group II	uncultured marine group II euryarchaeote HF200_89A11	uncultured marine group II euryarchaeote HF200_89A11	11	0	0	0	0	0	2	2	0	0	0	11	0	0	0	0	0	0	0	0	0	0
OTU_1112	Archaea	Thaumarchaeota	Marine Group I	Unknown Order	Unknown Family	Candidatus Nitrosopelagicus	Unclassified	21	8	0	0	2	1	10	0	0	0	0	174	9	0	0	0	0	1	0	0	0	0
OTU_1113	Archaea	Thaumarchaeota	Marine Group I	Unknown Order	Unknown Family	Candidatus Nitrosopumilus	uncultured thaumarchaeote	0	0	0	0	0	0	0	0	1	0	0	1	0	0	0	0	0	1	1	0	0	0
OTU_1114	Archaea	Thaumarchaeota	Marine Group I	Unclassified	Unclassified	Unclassified	Unclassified	0	0	0	0	0	0	0	0	1	0	0	0	0	0	0	0	0	0	0	0	0	0
OTU_1115	Archaea	Thaumarchaeota	Marine Group I	uncultured marine archaeon	uncultured marine archaeon	uncultured marine archaeon	uncultured marine archaeon	0	0	2	3	0	1	0	0	1	0	0	0	0	1	0	1	0	0	1	1	1	0
OTU_1116	Archaea	Thaumarchaeota	Marine Group I	Unknown Order	Unknown Family	Candidatus Nitrosopelagicus	Unclassified	0	0	0	0	0	0	0	0	2	0	0	0	0	0	0	0	0	0	0	0	0	0
OTU_1117	Archaea	Thaumarchaeota	Marine Group I	Unclassified	Unclassified	Unclassified	Unclassified	0	0	0	0	0	0	0	0	6	0	0	0	1	0	0	0	0	0	0	0	0	0
OTU_1118	Archaea	Thaumarchaeota	Marine Group I	Unclassified	Unclassified	Unclassified	Unclassified	0	0	0	0	0	0	0	0	0	0	0	0	0	0	0	0	0	0	0	0	0	2
OTU_1119	Archaea	Thaumarchaeota	Marine Group I	Unclassified	Unclassified	Unclassified	Unclassified	0	0	0	0	0	0	0	0	2	0	0	0	0	0	0	0	0	0	0	0	0	0
OTU_112	Archaea	Thaumarchaeota	AK31	uncultured archaeon	uncultured archaeon	uncultured archaeon	uncultured archaeon	0	0	4	0	0	0	0	0	0	0	0	0	0	0	12	0	0	0	0	0	0	0
OTU_1120	Archaea	Thaumarchaeota	Marine Group I	Unclassified	Unclassified	Unclassified	Unclassified	0	0	0	0	0	0	0	0	0	0	0	0	0	0	0	0	0	0	0	0	0	1
OTU_1121	Archaea	Thaumarchaeota	Unclassified	Unclassified	Unclassified	Unclassified	Unclassified	0	2	4	2	0	0	0	3	4	3	1	0	0	1	0	0	0	0	2	0	0	2
OTU_1122	Archaea	Thaumarchaeota	Marine Group I	Unclassified	Unclassified	Unclassified	Unclassified	0	0	1	0	0	0	0	0	0	1	0	0	0	0	0	0	0	0	0	0	0	0
OTU_1123	Archaea	Thaumarchaeota	Marine Group I	Unclassified	Unclassified	Unclassified	Unclassified	0	0	0	0	0	0	0	0	0	0	0	0	0	0	0	0	0	0	1	0	0	0
OTU_1124	Archaea	Thaumarchaeota	Marine Group I	uncultured marine archaeon	uncultured marine archaeon	uncultured marine archaeon	uncultured marine archaeon	0	8	0	2	0	0	0	1	31	26	1	0	9	0	0	0	0	0	28	0	0	0
OTU_1125	Archaea	Thaumarchaeota	Marine Group I	uncultured thaumarchaeote	uncultured thaumarchaeote	uncultured thaumarchaeote	uncultured thaumarchaeote	0	2	2	0	0	0	0	0	1	8	0	0	3	0	0	0	0	0	7	0	0	0
OTU_1126	Archaea	Euryarchaeota	Thermoplasmata	Thermoplasmatales	Marine Group II	uncultured marine group II euryarchaeote HF200_89A11	uncultured marine group II euryarchaeote HF200_89A11	3	0	0	0	0	0	1	0	0	0	0	4	0	0	0	0	0	0	0	0	0	0
OTU_1127	Archaea	Thaumarchaeota	Marine Benthic Group A	uncultured marine archaeon	uncultured marine archaeon	uncultured marine archaeon	uncultured marine archaeon	0	0	1	0	0	0	0	0	0	0	0	0	0	0	0	0	0	0	0	0	0	0
OTU_1128	Archaea	Thaumarchaeota	F9P122000-Arc-2-E02	uncultured marine archaeon	uncultured marine archaeon	uncultured marine archaeon	uncultured marine archaeon	0	0	1	0	0	0	0	0	0	0	0	0	0	0	0	0	0	0	0	0	0	0
OTU_1129	Archaea	Thaumarchaeota	Marine Group I	Unclassified	Unclassified	Unclassified	Unclassified	0	0	0	1	0	2	0	1	0	0	0	0	0	0	0	0	2	0	0	0	0	0
OTU_113	Archaea	Thaumarchaeota	Marine Group I	Unclassified	Unclassified	Unclassified	Unclassified	0	0	0	0	0	0	0	0	0	0	0	0	0	0	15	1	0	0	0	0	0	0
OTU_1130	Archaea	Woesearchaeota (DHVEG-6)	uncultured euryarchaeote	uncultured euryarchaeote	uncultured euryarchaeote	uncultured euryarchaeote	uncultured euryarchaeote	0	0	0	0	1	0	0	0	0	0	0	0	0	0	0	0	0	0	0	0	0	0
OTU_1131	Archaea	Thaumarchaeota	Marine Group I	Unclassified	Unclassified	Unclassified	Unclassified	0	0	0	0	2	1	0	3	0	1	3	0	0	0	0	2	0	0	1	0	3	4
OTU_1132	Archaea	Euryarchaeota	Methanomicrobia	Methanosarcinales	Methanosaetaceae	Methanosaeta	Unclassified	0	0	0	0	0	0	0	0	0	0	0	0	0	0	0	0	0	1	0	0	0	0
OTU_1133	Archaea	Euryarchaeota	Thermoplasmata	Thermoplasmatales	Marine Group II	uncultured marine group II euryarchaeote HF500_30A08	uncultured marine group II euryarchaeote HF500_30A08	0	1	0	0	0	0	0	0	0	1	2	0	1	0	0	0	0	0	0	0	0	0
OTU_1134	Archaea	Thaumarchaeota	Marine Group I	Unclassified	Unclassified	Unclassified	Unclassified	0	0	1	0	0	0	0	0	0	0	0	0	0	0	0	0	0	0	0	0	0	0
OTU_1135	Archaea	Euryarchaeota	Thermoplasmata	Thermoplasmatales	Marine Group III	uncultured marine archaeon	uncultured marine archaeon	0	0	0	0	1	0	0	0	0	0	0	0	0	0	0	0	0	0	0	0	0	0
OTU_1136	Archaea	Euryarchaeota	Thermoplasmata	Thermoplasmatales	Marine Group II	uncultured marine group II euryarchaeote HF10_36B02	uncultured marine group II euryarchaeote HF10_36B02	30	0	0	0	2	0	23	2	0	0	0	13	0	0	0	0	0	0	0	16	0	0
OTU_1137	Archaea	Thaumarchaeota	Marine Group I	Unknown Order	Unknown Family	Candidatus Nitrosopelagicus	marine metagenome	0	0	0	0	0	0	0	0	0	0	0	1	0	0	0	0	0	0	0	0	0	0
OTU_1138	Archaea	Euryarchaeota	Thermoplasmata	Thermoplasmatales	Marine Group II	marine metagenome	marine metagenome	3	0	0	0	0	0	4	0	0	0	0	11	0	0	0	0	0	0	0	0	0	0
OTU_1139	Archaea	Thaumarchaeota	Marine Group I	Unknown Order	Unknown Family	Candidatus Nitrosopelagicus	uncultured archaeon	0	15	0	0	1	0	0	0	29	0	0	1	15	0	0	0	0	0	3	0	0	0
OTU_114	Archaea	Euryarchaeota	Thermoplasmata	Thermoplasmatales	Marine Group II	uncultured marine group II euryarchaeote	uncultured marine group II euryarchaeote	0	0	0	0	1	2	0	0	0	0	0	0	0	0	1	4	38	0	0	0	0	0
OTU_115	Bacteria	Unclassified	Unclassified	Unclassified	Unclassified	Unclassified	Unclassified	0	0	0	0	0	0	0	0	0	3	0	0	0	0	0	0	0	0	0	0	13	87
OTU_116	Archaea	Unclassified	Unclassified	Unclassified	Unclassified	Unclassified	Unclassified	0	0	0	0	0	0	0	0	0	0	0	0	0	0	0	3	0	0	0	0	0	27
OTU_117	Archaea	Woesearchaeota (DHVEG-6)	uncultured euryarchaeote	uncultured euryarchaeote	uncultured euryarchaeote	uncultured euryarchaeote	uncultured euryarchaeote	0	0	0	0	0	0	0	0	0	0	0	0	0	0	21	0	0	0	0	24	0	0
OTU_118	Archaea	Unclassified	Unclassified	Unclassified	Unclassified	Unclassified	Unclassified	0	0	0	0	0	0	0	0	0	0	0	0	0	0	0	0	0	0	0	0	4	0
OTU_119	Unclassified	Unclassified	Unclassified	Unclassified	Unclassified	Unclassified	Unclassified	0	0	0	0	0	0	4	0	0	0	0	0	0	0	0	0	0	0	0	0	0	0
OTU_12	Archaea	Thaumarchaeota	Marine Group I	uncultured marine archaeon	uncultured marine archaeon	uncultured marine archaeon	uncultured marine archaeon	2	76	20	1	1	1	0	0	166	178	0	1	76	7	0	0	0	0	371	0	0	0
OTU_120	Bacteria	Proteobacteria	Gammaproteobacteria	Xanthomonadales	Solimonadaceae	Polycyclovorans	Polycyclovorans algicola TG408	0	0	0	0	0	0	0	0	5	0	0	0	0	0	0	0	0	0	0	0	0	0
OTU_121	Archaea	Thaumarchaeota	Marine Group I	uncultured marine group I thaumarchaeote	uncultured marine group I thaumarchaeote	uncultured marine group I thaumarchaeote	uncultured marine group I thaumarchaeote	0	0	0	2	2	0	0	0	0	0	0	0	0	100	773	444	314	0	0	0	0	1
OTU_122	Archaea	Thaumarchaeota	Marine Group I	Unknown Order	Unknown Family	Candidatus Nitrosopumilus	uncultured marine archaeon	0	2	1	0	16	108	0	29	10	0	13	0	0	1	0	4	21	4	0	3	1	17
OTU_123	Archaea	Thaumarchaeota	AK59	uncultured marine group I thaumarchaeote	uncultured marine group I thaumarchaeote	uncultured marine group I thaumarchaeote	uncultured marine group I thaumarchaeote	0	0	0	0	0	0	0	0	0	0	0	0	0	14	0	0	0	0	0	0	0	0
OTU_124	Archaea	Unclassified	Unclassified	Unclassified	Unclassified	Unclassified	Unclassified	0	0	0	0	0	0	0	0	0	0	0	0	0	0	0	0	0	0	0	20	0	0
OTU_125	Archaea	Thaumarchaeota	AK59	uncultured marine group I thaumarchaeote	uncultured marine group I thaumarchaeote	uncultured marine group I thaumarchaeote	uncultured marine group I thaumarchaeote	0	0	12	5	29	10	0	0	0	0	0	0	0	10	3	8	11	0	0	0	0	0
OTU_126	Archaea	Euryarchaeota	Thermoplasmata	Thermoplasmatales	Marine Group II	uncultured archaeon	uncultured archaeon	0	0	0	0	1	1	0	2	0	0	0	0	0	5	7	8	15	0	0	4	0	0
OTU_127	Archaea	Thaumarchaeota	Marine Benthic Group A	uncultured marine archaeon	uncultured marine archaeon	uncultured marine archaeon	uncultured marine archaeon	0	0	0	0	0	0	0	0	0	0	0	0	0	0	13	3	5	0	0	0	0	0
OTU_128	Archaea	Thaumarchaeota	Marine Group I	Unclassified	Unclassified	Unclassified	Unclassified	0	3	0	0	0	0	0	0	0	0	0	0	1	0	0	0	0	0	0	0	0	0
OTU_129	Archaea	Thaumarchaeota	Marine Group I	Unknown Order	Unknown Family	Candidatus Nitrosopelagicus	uncultured archaeon	0	43	0	0	0	0	0	0	49	47	0	2	26	0	0	0	0	0	88	0	2	5
OTU_13	Archaea	Thaumarchaeota	Marine Group I	uncultured marine archaeon	uncultured marine archaeon	uncultured marine archaeon	uncultured marine archaeon	4	168	519	104	95	48	1	140	74	118	5	2	174	109	0	31	23	0	117	4	21	29
OTU_130	Archaea	Thaumarchaeota	Marine Benthic Group A	Unclassified	Unclassified	Unclassified	Unclassified	0	0	0	0	1	0	0	0	0	0	0	0	0	0	0	5	6	0	0	0	0	0
OTU_131	Bacteria	Unclassified	Unclassified	Unclassified	Unclassified	Unclassified	Unclassified	0	0	0	0	0	0	0	0	3	0	0	0	0	0	0	0	0	0	2	0	0	0
OTU_132	Archaea	Thaumarchaeota	Marine Benthic Group A	uncultured marine archaeon	uncultured marine archaeon	uncultured marine archaeon	uncultured marine archaeon	1	4	1	23	34	7	0	0	77	0	0	0	2	1	5	7	4	0	142	0	0	0
OTU_133	Archaea	Euryarchaeota	Thermoplasmata	Thermoplasmatales	Marine Group II	uncultured marine group II euryarchaeote HF500_30A08	uncultured marine group II euryarchaeote HF500_30A08	0	3	6	0	2	2	0	2	0	0	22	0	1	634	679	276	184	0	0	7	8	0
OTU_134	Archaea	Euryarchaeota	Thermoplasmata	Thermoplasmatales	Marine Group III	uncultured marine group III euryarchaeote	uncultured marine group III euryarchaeote	0	0	0	0	0	0	0	0	0	0	0	0	0	0	3	15	2	0	0	0	0	0
OTU_135	Archaea	Thaumarchaeota	Soil Crenarchaeotic Group(SCG)	uncultured archaeon	uncultured archaeon	uncultured archaeon	uncultured archaeon	0	0	0	0	0	0	0	0	0	22	0	0	0	0	0	0	0	0	0	0	0	0
OTU_136	Archaea	Euryarchaeota	Thermoplasmata	Thermoplasmatales	Marine Group III	uncultured archaeon	uncultured archaeon	0	0	3	20	24	26	0	4	0	0	0	0	0	12	65	28	33	0	0	0	0	0
OTU_137	Archaea	Thaumarchaeota	Marine Group I	uncultured thaumarchaeote	uncultured thaumarchaeote	uncultured thaumarchaeote	uncultured thaumarchaeote	0	38	13	2	1	3	0	10	52	36	0	0	45	1	0	0	1	0	44	0	1	17
OTU_138	Archaea	Euryarchaeota	Thermoplasmata	Thermoplasmatales	Marine Group II	uncultured archeon 'KTK 31A'	uncultured archeon 'KTK 31A'	748	15	25	3	11	16	548	222	0	0	0	866	29	9	0	2	4	0	0	0	0	0
OTU_139	Bacteria	Unclassified	Unclassified	Unclassified	Unclassified	Unclassified	Unclassified	0	0	0	0	0	0	1	0	0	0	0	0	0	0	0	0	0	31	3	0	0	0
OTU_14	Archaea	Euryarchaeota	Thermoplasmata	Thermoplasmatales	Marine Group II	Unclassified	Unclassified	1024	14	12	0	9	7	334	134	0	0	0	885	24	6	0	0	5	9	0	1	0	0
OTU_140	Unclassified	Unclassified	Unclassified	Unclassified	Unclassified	Unclassified	Unclassified	0	0	0	0	0	0	0	0	0	0	0	0	0	0	0	0	0	0	0	0	0	10
OTU_141	Archaea	Euryarchaeota	Thermoplasmata	Thermoplasmatales	Marine Group II	uncultured marine group II euryarchaeote HF200_89A11	uncultured marine group II euryarchaeote HF200_89A11	94	0	0	0	1	0	15	6	0	0	0	90	1	0	0	0	0	0	0	0	0	0
OTU_142	Archaea	Euryarchaeota	Halobacteria	Halobacteriales	Halobacteriaceae	Natronococcus	Unclassified	0	0	0	0	0	0	0	0	0	0	0	0	0	0	0	0	0	0	0	44	0	0
OTU_143	Bacteria	Planctomycetes	OM190	uncultured Planctomycetaceae bacterium	uncultured Planctomycetaceae bacterium	uncultured Planctomycetaceae bacterium	uncultured Planctomycetaceae bacterium	0	0	0	0	0	0	0	0	0	0	0	0	0	0	0	0	0	2	0	0	0	0
OTU_144	Unclassified	Unclassified	Unclassified	Unclassified	Unclassified	Unclassified	Unclassified	0	0	0	0	0	0	2	0	0	0	0	0	0	0	0	0	0	0	1	0	0	0
OTU_145	Archaea	Woesearchaeota (DHVEG-6)	uncultured euryarchaeote	uncultured euryarchaeote	uncultured euryarchaeote	uncultured euryarchaeote	uncultured euryarchaeote	0	0	0	0	0	0	0	0	0	0	0	0	0	0	0	1	7	0	0	0	0	0
OTU_146	Archaea	Euryarchaeota	Thermoplasmata	Thermoplasmatales	Marine Group III	uncultured marine archaeon	uncultured marine archaeon	0	0	2	0	0	1	0	0	0	0	0	1	2	22	2	1	1	0	0	0	0	0
OTU_147	Archaea	Thaumarchaeota	Marine Group I	Unclassified	Unclassified	Unclassified	Unclassified	0	0	1	6	0	2	0	0	0	7	0	0	0	0	0	0	0	0	1	0	1	2
OTU_148	Archaea	Thaumarchaeota	Marine Group I	Unclassified	Unclassified	Unclassified	Unclassified	0	3	0	0	0	2	0	0	4	9	0	0	3	0	0	0	0	0	6	0	0	0
OTU_149	Archaea	Woesearchaeota (DHVEG-6)	uncultured euryarchaeote	uncultured euryarchaeote	uncultured euryarchaeote	uncultured euryarchaeote	uncultured euryarchaeote	0	0	0	0	0	1	0	12	0	0	0	0	3	1	0	0	1	0	0	10	0	0
OTU_15	Archaea	Euryarchaeota	Methanomicrobia	Methanosarcinales	Methanosaetaceae	Methanosaeta	uncultured Methanosarcinales archaeon	0	0	0	0	0	0	0	0	2	107	1	0	0	0	0	0	0	293	0	83	0	316
OTU_150	Archaea	Euryarchaeota	Thermoplasmata	Thermoplasmatales	Marine Group II	Unclassified	Unclassified	0	0	0	0	0	0	0	0	0	0	0	0	0	2	12	1	2	0	0	0	0	0
OTU_151	Bacteria	Unclassified	Unclassified	Unclassified	Unclassified	Unclassified	Unclassified	0	0	0	0	0	0	0	0	0	0	0	0	0	0	0	0	0	3	0	0	0	0
OTU_152	Archaea	Euryarchaeota	Thermoplasmata	Thermoplasmatales	Marine Group III	uncultured archaeon	uncultured archaeon	0	24	87	68	72	80	0	385	0	0	0	1	19	61	9	18	47	0	1	108	0	0
OTU_153	Archaea	Thaumarchaeota	Marine Group I	uncultured marine archaeon	uncultured marine archaeon	uncultured marine archaeon	uncultured marine archaeon	0	0	0	0	0	0	0	0	2	0	0	0	0	0	0	0	0	0	0	0	0	0
OTU_154	Archaea	Euryarchaeota	Thermoplasmata	Thermoplasmatales	Marine Group II	uncultured marine archaeon	uncultured marine archaeon	1	0	0	0	0	0	0	0	0	0	0	1	0	0	8	0	12	0	0	0	0	0
OTU_155	Archaea	Euryarchaeota	Thermoplasmata	Thermoplasmatales	Marine Group II	Unclassified	Unclassified	0	0	0	0	7	6	3	24	0	0	0	33	1	0	0	1	0	0	0	0	0	0
OTU_156	Bacteria	Bacteroidetes	Sphingobacteriia	Sphingobacteriales	Chitinophagaceae	Flavisolibacter	Unclassified	0	0	0	0	0	0	0	0	0	2	0	0	0	0	0	0	0	0	0	0	0	0
OTU_157	Archaea	Euryarchaeota	Thermoplasmata	Thermoplasmatales	Marine Group II	Unclassified	Unclassified	0	4	0	0	0	0	1	0	0	0	0	6	5	0	0	0	0	0	0	0	0	0
OTU_158	Archaea	Unclassified	Unclassified	Unclassified	Unclassified	Unclassified	Unclassified	0	0	0	0	0	0	0	0	0	0	0	0	0	0	0	0	0	42	0	0	0	0
OTU_159	Archaea	Thaumarchaeota	Marine Group I	uncultured thaumarchaeote	uncultured thaumarchaeote	uncultured thaumarchaeote	uncultured thaumarchaeote	1	18	0	0	0	0	1	0	127	88	0	1	20	0	0	0	0	0	58	0	1	0
OTU_16	Archaea	Euryarchaeota	Thermoplasmata	Thermoplasmatales	Marine Group II	uncultured marine group II euryarchaeote	uncultured marine group II euryarchaeote	0	3	13	0	0	0	2	344	0	0	0	1	10	6	0	0	0	0	0	71	0	0
OTU_160	Archaea	Euryarchaeota	Thermoplasmata	Thermoplasmatales	Marine Group II	Unclassified	Unclassified	0	2	0	0	0	0	0	0	0	0	0	0	2	0	0	0	0	0	0	0	0	0
OTU_161	Archaea	Woesearchaeota (DHVEG-6)	uncultured archaeon	uncultured archaeon	uncultured archaeon	uncultured archaeon	uncultured archaeon	0	0	0	9	3	0	0	0	0	0	0	0	0	1	0	0	0	0	0	0	0	0
OTU_162	Archaea	Euryarchaeota	Thermoplasmata	Thermoplasmatales	Marine Group II	uncultured marine group II euryarchaeote	uncultured marine group II euryarchaeote	0	0	0	0	1	3	0	0	0	0	0	0	0	0	1	15	9	0	0	0	0	0
OTU_163	Archaea	Unclassified	Unclassified	Unclassified	Unclassified	Unclassified	Unclassified	0	0	0	0	0	0	0	0	0	0	0	0	0	0	0	0	0	0	0	0	6	0
OTU_164	Archaea	Thaumarchaeota	Marine Group I	Unknown Order	Unknown Family	Unclassified	Unclassified	0	0	0	0	0	0	0	0	0	0	0	0	3	0	0	0	0	0	0	0	0	0
OTU_165	Archaea	Euryarchaeota	Thermoplasmata	Thermoplasmatales	Marine Group III	uncultured marine archaeon	uncultured marine archaeon	0	0	0	0	0	0	0	0	0	0	0	0	0	2	0	0	0	0	0	0	0	0
OTU_166	Archaea	Euryarchaeota	Thermoplasmata	Thermoplasmatales	Marine Group II	uncultured marine group II euryarchaeote	uncultured marine group II euryarchaeote	0	0	0	0	0	0	0	0	0	0	0	5	0	0	0	0	0	0	0	0	0	0
OTU_167	Archaea	Euryarchaeota	Thermoplasmata	Thermoplasmatales	Marine Group III	uncultured marine archaeon	uncultured marine archaeon	0	0	0	0	0	0	0	0	0	0	0	0	7	0	0	0	0	0	0	0	0	0
OTU_168	Archaea	Thaumarchaeota	pSL12	uncultured marine crenarchaeote AD1000-23-H12	uncultured marine crenarchaeote AD1000-23-H12	uncultured marine crenarchaeote AD1000-23-H12	uncultured marine crenarchaeote AD1000-23-H12	0	0	0	0	0	0	0	0	0	0	0	0	0	4	0	0	0	0	0	0	0	0
OTU_169	Unclassified	Unclassified	Unclassified	Unclassified	Unclassified	Unclassified	Unclassified	0	0	0	0	0	0	0	0	0	2	0	0	0	0	0	0	0	0	0	0	0	9
OTU_17	Archaea	Thaumarchaeota	Marine Benthic Group A	uncultured marine archaeon	uncultured marine archaeon	uncultured marine archaeon	uncultured marine archaeon	0	16	25	19	73	26	0	40	79	119	0	3	11	33	0	23	23	0	0	0	11	0
OTU_170	Archaea	Woesearchaeota (DHVEG-6)	uncultured euryarchaeote	uncultured euryarchaeote	uncultured euryarchaeote	uncultured euryarchaeote	uncultured euryarchaeote	0	0	0	0	1	0	0	0	0	0	0	0	0	0	31	5	0	0	0	1	0	0
OTU_171	Archaea	Unclassified	Unclassified	Unclassified	Unclassified	Unclassified	Unclassified	0	0	0	0	0	0	0	0	0	0	0	0	0	0	0	0	0	0	4	0	0	0
OTU_172	Archaea	Unclassified	Unclassified	Unclassified	Unclassified	Unclassified	Unclassified	0	0	0	0	0	0	0	0	0	0	0	0	0	0	0	0	0	3	0	0	0	0
OTU_173	Archaea	Euryarchaeota	Thermoplasmata	Thermoplasmatales	Marine Group II	uncultured marine group II euryarchaeote HF130_28F07	uncultured marine group II euryarchaeote HF130_28F07	0	1	0	0	0	1	0	0	0	0	0	9	2	0	0	0	0	0	0	0	0	0
OTU_174	Archaea	Thaumarchaeota	Marine Benthic Group A	uncultured marine group I thaumarchaeote	uncultured marine group I thaumarchaeote	uncultured marine group I thaumarchaeote	uncultured marine group I thaumarchaeote	0	0	0	0	0	0	0	0	0	0	0	0	1	0	0	0	0	0	0	0	0	0
OTU_175	Archaea	Thaumarchaeota	Marine Group I	uncultured marine archaeon	uncultured marine archaeon	uncultured marine archaeon	uncultured marine archaeon	0	5	12	2	0	2	0	1	8	6	0	0	10	1	0	0	0	0	12	0	0	0
OTU_176	Bacteria	Unclassified	Unclassified	Unclassified	Unclassified	Unclassified	Unclassified	0	0	0	0	0	2	0	0	0	0	0	0	0	0	0	0	0	0	0	0	0	0
OTU_177	Archaea	Euryarchaeota	Thermoplasmata	Thermoplasmatales	Marine Group II	Unclassified	Unclassified	2	0	0	0	0	0	1	0	0	0	0	2	0	0	0	0	0	0	0	0	0	0
OTU_178	Archaea	Euryarchaeota	Thermoplasmata	Thermoplasmatales	Marine Group III	uncultured marine archaeon	uncultured marine archaeon	0	0	0	0	0	0	0	1	0	0	0	0	0	0	0	0	0	0	0	0	0	0
OTU_179	Archaea	Euryarchaeota	Methanomicrobia	Methanosarcinales	Methanosaetaceae	Methanosaeta	uncultured methanogenic archaeon	0	0	0	0	0	0	0	0	0	0	0	0	0	0	0	0	0	1	0	0	0	0
OTU_18	Archaea	Euryarchaeota	Thermoplasmata	Thermoplasmatales	Marine Group II	uncultured marine group II euryarchaeote	uncultured marine group II euryarchaeote	0	0	21	19	50	94	0	58	0	0	0	0	0	28	8	18	20	0	6	296	0	0
OTU_180	Archaea	Euryarchaeota	Thermoplasmata	Thermoplasmatales	Marine Group III	uncultured marine archaeon	uncultured marine archaeon	0	0	0	0	0	0	0	1	0	0	0	0	0	1	0	0	0	0	0	0	0	0
OTU_181	Archaea	Euryarchaeota	Thermoplasmata	Thermoplasmatales	Marine Group II	uncultured marine group II euryarchaeote HF130_28F07	uncultured marine group II euryarchaeote HF130_28F07	0	0	0	0	0	0	0	0	0	0	0	0	1	0	0	0	0	0	0	0	0	0
OTU_182	Archaea	Thaumarchaeota	Marine Group I	Unclassified	Unclassified	Unclassified	Unclassified	0	0	2	0	0	0	0	0	0	0	0	0	2	0	0	0	0	0	1	0	0	0
OTU_183	Archaea	Thaumarchaeota	Marine Group I	uncultured thaumarchaeote	uncultured thaumarchaeote	uncultured thaumarchaeote	uncultured thaumarchaeote	0	1	0	0	0	0	0	0	0	0	0	1	2	0	0	0	0	0	0	0	1	0
OTU_184	Archaea	Euryarchaeota	Thermoplasmata	Thermoplasmatales	Marine Group II	Unclassified	Unclassified	0	0	0	0	0	0	0	0	0	0	0	2	6	0	0	0	0	0	0	0	0	0
OTU_185	Archaea	Thaumarchaeota	Marine Group I	uncultured marine archaeon	uncultured marine archaeon	uncultured marine archaeon	uncultured marine archaeon	0	0	0	0	0	0	0	0	0	0	0	0	0	4	2	0	0	0	0	0	0	0
OTU_186	Archaea	Euryarchaeota	Thermoplasmata	Thermoplasmatales	Marine Group II	uncultured marine group II euryarchaeote HF200_89A11	uncultured marine group II euryarchaeote HF200_89A11	0	2	2	3	2	1	0	27	0	0	0	0	0	17	17	6	5	0	0	0	0	0
OTU_187	Archaea	Euryarchaeota	Thermoplasmata	Thermoplasmatales	Marine Group II	Unclassified	Unclassified	0	0	1	0	2	0	0	1	0	0	0	0	0	8	3	2	0	0	0	0	0	0
OTU_188	Archaea	Thaumarchaeota	Marine Group I	uncultured marine group I thaumarchaeote	uncultured marine group I thaumarchaeote	uncultured marine group I thaumarchaeote	uncultured marine group I thaumarchaeote	0	0	0	0	0	0	0	0	0	0	0	0	0	1	1	2	0	0	0	0	0	0
OTU_189	Archaea	Thaumarchaeota	Marine Group I	Unclassified	Unclassified	Unclassified	Unclassified	0	0	0	1	2	0	0	0	0	0	1	0	0	0	0	0	0	0	0	0	0	0
OTU_19	Archaea	Thaumarchaeota	Marine Group I	uncultured marine group I thaumarchaeote	uncultured marine group I thaumarchaeote	uncultured marine group I thaumarchaeote	uncultured marine group I thaumarchaeote	0	34	306	695	807	548	0	179	0	167	175	0	27	156	374	400	394	0	0	27	318	600
OTU_190	Archaea	Euryarchaeota	Thermoplasmata	Thermoplasmatales	Marine Group III	uncultured marine group III euryarchaeote HF200_25B11	uncultured marine group III euryarchaeote HF200_25B11	0	6	0	0	0	0	3	2	0	0	0	0	12	1	0	0	0	0	0	0	0	0
OTU_191	Archaea	Thaumarchaeota	Marine Group I	uncultured marine archaeon	uncultured marine archaeon	uncultured marine archaeon	uncultured marine archaeon	0	16	50	22	22	18	0	17	10	33	53	2	22	12	1	7	2	0	28	6	13	24
OTU_192	Archaea	Euryarchaeota	Thermoplasmata	Thermoplasmatales	Marine Group II	uncultured marine group II euryarchaeote HF500_30A08	uncultured marine group II euryarchaeote HF500_30A08	0	0	0	0	0	0	0	0	0	0	0	0	0	0	0	0	0	0	0	2	0	0
OTU_193	Archaea	Thaumarchaeota	Marine Benthic Group A	uncultured marine archaeon	uncultured marine archaeon	uncultured marine archaeon	uncultured marine archaeon	0	0	0	0	0	0	0	0	3	0	0	0	0	0	0	0	0	0	3	0	0	0
OTU_194	Archaea	Thaumarchaeota	Marine Benthic Group A	uncultured crenarchaeote	uncultured crenarchaeote	uncultured crenarchaeote	uncultured crenarchaeote	0	0	0	0	0	0	0	0	0	0	0	0	0	1	0	1	1	0	0	3	0	0
OTU_195	Archaea	Thaumarchaeota	Marine Group I	Unclassified	Unclassified	Unclassified	Unclassified	0	0	5	11	14	14	0	2	2	5	42	0	0	1	0	2	4	0	1	0	7	14
OTU_196	Archaea	Euryarchaeota	Thermoplasmata	Thermoplasmatales	Marine Group II	uncultured marine group II euryarchaeote HF10_20F02	uncultured marine group II euryarchaeote HF10_20F02	18	0	0	0	0	0	5	2	4	0	11	14	0	0	0	0	0	6	0	8	0	0
OTU_197	Archaea	Euryarchaeota	Thermoplasmata	Thermoplasmatales	Marine Group II	uncultured marine group II euryarchaeote HF200_89A11	uncultured marine group II euryarchaeote HF200_89A11	1	0	0	0	0	0	0	0	0	0	0	0	0	0	0	0	0	0	0	0	0	0
OTU_198	Archaea	Euryarchaeota	Thermoplasmata	Thermoplasmatales	Marine Group II	Unclassified	Unclassified	13	0	0	0	0	0	24	0	0	0	0	7	0	0	0	0	0	0	0	0	0	0
OTU_199	Archaea	Euryarchaeota	Thermoplasmata	Thermoplasmatales	Marine Group III	uncultured marine archaeon	uncultured marine archaeon	0	1	15	3	11	32	0	16	0	0	0	0	1	4	0	3	8	0	0	10	0	0
OTU_2	Archaea	Euryarchaeota	Thermoplasmata	Thermoplasmatales	Marine Group III	uncultured marine group III euryarchaeote HF10_21C05	uncultured marine group III euryarchaeote HF10_21C05	741	12	2	1	3	2	481	10	0	0	0	278	20	2	0	1	0	0	0	77	0	0
OTU_20	Archaea	Euryarchaeota	Thermoplasmata	Thermoplasmatales	Marine Group II	uncultured marine group II euryarchaeote	uncultured marine group II euryarchaeote	0	0	0	0	0	0	0	0	0	0	0	0	0	0	0	0	0	0	0	0	0	205
OTU_200	Archaea	Euryarchaeota	Thermoplasmata	Thermoplasmatales	Marine Group II	uncultured marine group II euryarchaeote HF10_36B02	uncultured marine group II euryarchaeote HF10_36B02	46	0	0	0	0	0	20	0	0	0	0	16	0	0	0	0	0	0	0	0	0	0
OTU_201	Archaea	Thaumarchaeota	Marine Group I	uncultured marine archaeon	uncultured marine archaeon	uncultured marine archaeon	uncultured marine archaeon	0	1	5	3	3	0	0	0	0	2	0	0	0	0	0	0	0	0	1	0	0	1
OTU_202	Archaea	Euryarchaeota	Thermoplasmata	Thermoplasmatales	Marine Group II	uncultured deep-sea archaeon	uncultured deep-sea archaeon	0	26	7	2	2	1	0	3	17	4	6	3	43	5	0	0	0	0	3	2	2	0
OTU_203	Archaea	Woesearchaeota (DHVEG-6)	Unclassified	Unclassified	Unclassified	Unclassified	Unclassified	0	1	0	0	0	0	0	0	0	0	0	0	0	0	0	0	0	0	0	0	0	0
OTU_204	Archaea	Thaumarchaeota	Marine Group I	Unclassified	Unclassified	Unclassified	Unclassified	0	0	0	0	0	0	0	0	0	1	0	0	0	0	0	0	0	0	0	0	1	0
OTU_205	Archaea	Thaumarchaeota	Marine Group I	Unknown Order	Unknown Family	Candidatus Nitrosopelagicus	uncultured thaumarchaeote	3	0	0	0	0	0	9	0	0	1	0	92	2	0	0	0	0	0	0	0	0	0
OTU_206	Archaea	Euryarchaeota	Thermoplasmata	Thermoplasmatales	Marine Group II	uncultured marine group II euryarchaeote HF200_89A11	uncultured marine group II euryarchaeote HF200_89A11	4	0	0	0	0	0	0	0	0	0	0	3	0	0	0	0	0	0	0	0	0	0
OTU_207	Archaea	Euryarchaeota	Thermoplasmata	Thermoplasmatales	Marine Group II	uncultured marine group II euryarchaeote HF10_36B02	uncultured marine group II euryarchaeote HF10_36B02	0	0	0	0	0	0	1	0	0	0	0	0	0	0	0	0	0	0	0	0	0	0
OTU_208	Archaea	Thaumarchaeota	Marine Group I	Unknown Order	Unknown Family	Candidatus Nitrosoarchaeum	uncultured archaeon	0	0	0	0	0	1	0	0	0	0	0	0	0	0	0	0	0	0	0	0	0	0
OTU_209	Archaea	Thaumarchaeota	Marine Group I	Unclassified	Unclassified	Unclassified	Unclassified	0	0	0	0	0	0	0	0	0	0	0	0	0	0	0	0	0	0	0	0	1	0
OTU_21	Archaea	Euryarchaeota	Thermoplasmata	Thermoplasmatales	Marine Group II	uncultured marine group II euryarchaeote HF10_36B02	uncultured marine group II euryarchaeote HF10_36B02	381	0	2	0	13	0	331	40	0	0	0	194	2	0	0	0	0	0	0	65	0	0
OTU_210	Archaea	Euryarchaeota	Thermoplasmata	Thermoplasmatales	Marine Group II	Unclassified	Unclassified	2	0	0	0	0	0	3	0	0	0	0	1	0	0	0	0	0	0	0	0	0	0
OTU_211	Archaea	Thaumarchaeota	Marine Benthic Group A	uncultured marine group I thaumarchaeote	uncultured marine group I thaumarchaeote	uncultured marine group I thaumarchaeote	uncultured marine group I thaumarchaeote	0	0	0	0	0	0	0	0	0	0	0	0	0	0	0	0	0	0	0	0	1	1
OTU_212	Archaea	Thaumarchaeota	F9P122000-Arc-2-E02	uncultured marine archaeon	uncultured marine archaeon	uncultured marine archaeon	uncultured marine archaeon	0	1	0	0	0	0	0	1	1	4	0	0	1	0	0	0	0	0	2	0	0	0
OTU_213	Archaea	Thaumarchaeota	Marine Group I	uncultured archaeon	uncultured archaeon	uncultured archaeon	uncultured archaeon	0	0	0	0	0	0	0	0	2	0	0	0	1	0	0	0	0	0	0	0	0	0
OTU_214	Archaea	Thaumarchaeota	Marine Group I	uncultured marine archaeon	uncultured marine archaeon	uncultured marine archaeon	uncultured marine archaeon	0	11	29	13	10	13	0	7	21	23	9	1	11	4	0	1	1	0	16	1	6	0
OTU_215	Archaea	Thaumarchaeota	Marine Group I	Unclassified	Unclassified	Unclassified	Unclassified	0	0	0	0	0	0	0	0	0	2	0	0	0	0	0	0	0	0	0	0	0	1
OTU_216	Archaea	Euryarchaeota	Thermoplasmata	Thermoplasmatales	Marine Group II	uncultured marine group II euryarchaeote HF500_30A08	uncultured marine group II euryarchaeote HF500_30A08	0	0	0	0	0	0	0	0	0	0	2	0	0	0	0	0	0	0	0	1	1	0
OTU_217	Archaea	Euryarchaeota	Thermoplasmata	Thermoplasmatales	Marine Group II	uncultured marine group II euryarchaeote HF500_30A08	uncultured marine group II euryarchaeote HF500_30A08	0	0	0	0	0	0	0	0	0	0	1	0	0	0	0	0	0	0	0	0	0	0
OTU_218	Archaea	Thaumarchaeota	Marine Group I	Unknown Order	Unknown Family	Candidatus Nitrosopelagicus	marine metagenome	0	0	0	0	0	0	0	0	0	0	0	0	0	0	0	0	0	1	0	0	0	0
OTU_219	Archaea	Euryarchaeota	Methanomicrobia	Methanosarcinales	Methanosarcinaceae	Methanosarcina	uncultured Methanosarcina sp.	0	0	0	0	0	0	0	0	0	0	0	0	0	0	0	0	0	1	0	0	0	0
OTU_22	Archaea	Euryarchaeota	Methanomicrobia	Methanosarcinales	Methanosarcinaceae	Methanosarcina	uncultured archaeon	0	0	0	0	0	0	0	0	0	0	2	0	0	0	0	0	0	354	51	63	0	409
OTU_220	Archaea	Euryarchaeota	Thermoplasmata	Thermoplasmatales	Marine Group II	uncultured marine group II euryarchaeote HF200_66A10	uncultured marine group II euryarchaeote HF200_66A10	54	811	109	67	99	82	56	65	688	120	927	66	733	20	3	8	49	114	499	710	850	1
OTU_221	Archaea	Thaumarchaeota	Marine Group I	Unclassified	Unclassified	Unclassified	Unclassified	0	0	0	0	0	0	0	0	1	1	0	0	0	0	0	0	0	0	1	0	0	0
OTU_222	Archaea	Euryarchaeota	Thermoplasmata	Thermoplasmatales	Marine Group II	Unclassified	Unclassified	0	0	0	0	0	0	0	0	0	0	0	0	0	0	0	0	0	0	0	1	3	0
OTU_223	Bacteria	Unclassified	Unclassified	Unclassified	Unclassified	Unclassified	Unclassified	0	0	0	0	0	0	0	0	0	0	0	0	0	0	0	0	0	0	0	2	0	0
OTU_224	Archaea	Thaumarchaeota	Marine Group I	Unclassified	Unclassified	Unclassified	Unclassified	0	3	21	1	1	4	0	40	2	1	0	0	6	10	0	0	0	0	4	22	0	0
OTU_225	Archaea	Euryarchaeota	Thermoplasmata	Thermoplasmatales	Marine Group II	Unclassified	Unclassified	0	0	0	0	0	0	0	0	0	0	0	0	0	0	0	0	0	0	0	1	0	0
OTU_226	Archaea	Thaumarchaeota	Marine Group I	uncultured marine archaeon	uncultured marine archaeon	uncultured marine archaeon	uncultured marine archaeon	0	0	0	0	3	0	0	0	0	0	2	0	1	0	0	0	0	0	0	0	1	0
OTU_227	Archaea	Thaumarchaeota	Marine Group I	Unclassified	Unclassified	Unclassified	Unclassified	1	6	7	41	10	7	0	18	2	5	11	0	12	27	0	2	0	0	5	0	5	1
OTU_228	Archaea	Thaumarchaeota	Marine Group I	Unclassified	Unclassified	Unclassified	Unclassified	0	0	1	0	0	0	0	0	0	0	0	0	0	0	0	0	0	0	0	0	0	0
OTU_229	Archaea	Euryarchaeota	Thermoplasmata	Thermoplasmatales	Marine Group II	uncultured marine microorganism HF200_10-06-02	uncultured marine microorganism HF200_10-06-02	2	30	0	0	0	0	0	0	0	0	0	0	16	0	0	0	0	0	0	0	0	0
OTU_23	Archaea	Thaumarchaeota	Marine Group I	uncultured thaumarchaeote	uncultured thaumarchaeote	uncultured thaumarchaeote	uncultured thaumarchaeote	1	52	154	98	51	38	1	134	37	105	0	2	90	213	313	122	64	0	51	10	19	5
OTU_230	Unclassified	Unclassified	Unclassified	Unclassified	Unclassified	Unclassified	Unclassified	0	0	0	0	0	0	0	0	1	0	0	0	0	0	0	0	0	0	0	0	0	0
OTU_231	Archaea	Thaumarchaeota	Marine Group I	uncultured thaumarchaeote	uncultured thaumarchaeote	uncultured thaumarchaeote	uncultured thaumarchaeote	0	0	0	0	0	0	0	0	1	0	0	0	0	0	0	0	0	0	0	0	0	0
OTU_232	Archaea	Thaumarchaeota	Marine Group I	Unclassified	Unclassified	Unclassified	Unclassified	0	3	0	0	0	0	2	0	42	16	0	1	9	0	0	0	0	0	28	0	0	11
OTU_233	Archaea	Thaumarchaeota	Marine Group I	Unclassified	Unclassified	Unclassified	Unclassified	0	0	0	0	0	0	0	0	1	0	0	0	0	0	0	0	0	0	0	0	0	0
OTU_234	Archaea	Thaumarchaeota	Marine Group I	uncultured marine group I thaumarchaeote	uncultured marine group I thaumarchaeote	uncultured marine group I thaumarchaeote	uncultured marine group I thaumarchaeote	8	129	357	78	47	42	6	51	440	324	33	3	113	11	0	7	4	0	437	4	28	31
OTU_235	Archaea	Woesearchaeota (DHVEG-6)	uncultured euryarchaeote	uncultured euryarchaeote	uncultured euryarchaeote	uncultured euryarchaeote	uncultured euryarchaeote	0	0	0	0	0	0	0	0	0	0	0	0	1	0	0	0	0	0	0	0	0	0
OTU_236	Archaea	Euryarchaeota	Thermoplasmata	Thermoplasmatales	Marine Group II	uncultured marine group II euryarchaeote HF130_27A09	uncultured marine group II euryarchaeote HF130_27A09	0	1	0	0	0	0	0	0	0	0	0	0	1	0	0	0	0	0	0	0	0	0
OTU_237	Archaea	Thaumarchaeota	Marine Group I	uncultured thaumarchaeote	uncultured thaumarchaeote	uncultured thaumarchaeote	uncultured thaumarchaeote	0	9	3	0	0	0	0	0	18	18	0	0	17	0	0	0	0	0	12	0	0	0
OTU_238	Archaea	Euryarchaeota	Thermoplasmata	Thermoplasmatales	Marine Group II	Unclassified	Unclassified	1	0	0	0	0	0	0	0	0	0	0	1	0	0	0	0	0	0	0	0	0	0
OTU_239	Archaea	Thaumarchaeota	Marine Group I	uncultured marine group I thaumarchaeote	uncultured marine group I thaumarchaeote	uncultured marine group I thaumarchaeote	uncultured marine group I thaumarchaeote	0	0	0	0	0	0	0	0	0	0	0	0	0	0	0	0	2	0	0	0	0	0
OTU_24	Archaea	Euryarchaeota	Thermoplasmata	Thermoplasmatales	Marine Group II	Unclassified	Unclassified	3	0	3	13	51	106	1	7	0	0	25	2	0	8	104	161	391	0	0	28	241	0
OTU_240	Archaea	Thaumarchaeota	Marine Group I	uncultured marine group I thaumarchaeote	uncultured marine group I thaumarchaeote	uncultured marine group I thaumarchaeote	uncultured marine group I thaumarchaeote	0	0	0	0	0	0	0	0	0	1	1	0	0	0	0	0	1	0	0	1	0	2
OTU_241	Archaea	Euryarchaeota	Thermoplasmata	Thermoplasmatales	Marine Group III	uncultured marine archaeon	uncultured marine archaeon	0	0	0	0	0	1	0	1	0	0	0	0	0	34	74	24	90	0	0	1	0	0
OTU_242	Archaea	Thaumarchaeota	Marine Group I	Unknown Order	Unknown Family	Candidatus Nitrosopumilus	uncultured marine group I thaumarchaeote	0	0	0	0	2	6	0	0	0	0	0	0	0	0	0	0	3	0	0	0	0	0
OTU_243	Archaea	Euryarchaeota	Thermoplasmata	Thermoplasmatales	Marine Group III	uncultured marine archaeon	uncultured marine archaeon	0	12	71	48	196	190	3	722	0	0	0	0	15	76	0	58	78	0	1	112	0	0
OTU_244	Archaea	Woesearchaeota (DHVEG-6)	Unclassified	Unclassified	Unclassified	Unclassified	Unclassified	0	0	0	6	6	4	0	0	0	0	0	0	0	0	28	27	10	0	0	0	13	0
OTU_245	Archaea	Thaumarchaeota	Marine Benthic Group A	uncultured marine archaeon	uncultured marine archaeon	uncultured marine archaeon	uncultured marine archaeon	0	0	0	1	0	1	0	0	0	0	0	0	1	4	3	0	2	0	0	0	0	0
OTU_246	Archaea	Thaumarchaeota	Marine Group I	Unknown Order	Unknown Family	Candidatus Nitrosopelagicus	Unclassified	0	2	0	0	0	0	0	0	5	1	0	0	1	0	2	0	0	0	2	0	0	0
OTU_247	Archaea	Thaumarchaeota	Marine Benthic Group A	uncultured marine archaeon	uncultured marine archaeon	uncultured marine archaeon	uncultured marine archaeon	0	0	3	2	1	0	0	0	0	0	0	0	0	0	7	1	0	0	0	0	0	0
OTU_248	Archaea	Thaumarchaeota	Marine Group I	Unclassified	Unclassified	Unclassified	Unclassified	0	0	0	0	1	0	0	0	0	0	0	0	0	49	316	108	93	0	0	0	1	0
OTU_249	Archaea	Thaumarchaeota	Marine Group I	Unclassified	Unclassified	Unclassified	Unclassified	0	0	0	0	0	0	0	0	0	0	0	0	0	0	0	0	0	0	0	0	0	1
OTU_25	Archaea	Euryarchaeota	Thermoplasmata	Thermoplasmatales	Marine Group III	uncultured marine archaeon	uncultured marine archaeon	1	0	92	52	169	225	0	137	0	0	0	0	4	36	1	56	110	0	2	360	0	0
OTU_250	Archaea	Thaumarchaeota	Marine Group I	Unclassified	Unclassified	Unclassified	Unclassified	0	0	0	0	0	0	0	0	0	0	0	0	0	0	0	0	0	0	0	0	0	1
OTU_251	Archaea	Thaumarchaeota	Marine Group I	Unclassified	Unclassified	Unclassified	Unclassified	0	0	0	0	0	1	0	0	1	4	0	0	0	0	0	0	0	0	0	0	2	1
OTU_252	Archaea	Woesearchaeota (DHVEG-6)	uncultured euryarchaeote	uncultured euryarchaeote	uncultured euryarchaeote	uncultured euryarchaeote	uncultured euryarchaeote	0	0	0	0	0	0	0	0	0	0	0	0	0	0	0	0	1	0	0	0	0	0
OTU_253	Archaea	Euryarchaeota	Thermoplasmata	Thermoplasmatales	Marine Group II	Unclassified	Unclassified	0	27	1	17	115	63	0	3	4	3	103	0	25	8	0	26	75	0	2	1	15	0
OTU_254	Archaea	Thaumarchaeota	Marine Group I	uncultured marine archaeon	uncultured marine archaeon	uncultured marine archaeon	uncultured marine archaeon	0	2	2	0	0	0	0	0	0	0	0	0	2	23	11	0	0	0	1	0	0	0
OTU_255	Archaea	Thaumarchaeota	Marine Benthic Group A	uncultured marine archaeon	uncultured marine archaeon	uncultured marine archaeon	uncultured marine archaeon	0	0	0	0	0	0	0	0	0	0	0	0	0	0	6	11	12	0	0	0	0	0
OTU_256	Bacteria	Unclassified	Unclassified	Unclassified	Unclassified	Unclassified	Unclassified	0	0	0	0	0	0	0	0	0	0	0	2	0	0	0	0	0	0	0	0	0	0
OTU_257	Archaea	Thaumarchaeota	Marine Group I	Unclassified	Unclassified	Unclassified	Unclassified	0	0	0	0	0	0	0	0	0	0	0	0	0	0	1	1	0	0	0	0	0	0
OTU_258	Archaea	Thaumarchaeota	Marine Group I	uncultured marine group I thaumarchaeote	uncultured marine group I thaumarchaeote	uncultured marine group I thaumarchaeote	uncultured marine group I thaumarchaeote	0	0	0	0	0	0	0	0	0	0	0	0	0	1	2	2	3	0	0	0	0	0
OTU_259	Archaea	Euryarchaeota	Thermoplasmata	Thermoplasmatales	Marine Group II	uncultured marine microorganism HF200_10-06-02	uncultured marine microorganism HF200_10-06-02	0	0	0	0	0	0	0	0	0	0	0	0	1	0	0	0	0	0	0	0	0	0
OTU_26	Archaea	Euryarchaeota	Thermoplasmata	Thermoplasmatales	Marine Group III	uncultured marine archaeon	uncultured marine archaeon	3	135	7	0	0	0	2	205	0	0	0	8	88	9	0	0	0	0	0	0	0	0
OTU_260	Archaea	Thaumarchaeota	Marine Group I	uncultured marine archaeon	uncultured marine archaeon	uncultured marine archaeon	uncultured marine archaeon	0	0	0	0	1	3	0	1	0	1	1	0	0	0	0	0	0	0	0	0	1	0
OTU_261	Archaea	Thaumarchaeota	Marine Group I	uncultured marine archaeon	uncultured marine archaeon	uncultured marine archaeon	uncultured marine archaeon	0	0	0	0	0	0	0	0	0	0	0	0	0	0	7	6	2	0	0	0	0	0
OTU_262	Archaea	Thaumarchaeota	Marine Group I	Marine Group I thaumarchaeote SCGC AAA799-D07	Marine Group I thaumarchaeote SCGC AAA799-D07	Marine Group I thaumarchaeote SCGC AAA799-D07	Marine Group I thaumarchaeote SCGC AAA799-D07	1	45	15	16	9	10	0	9	21	23	0	1	38	11	0	1	2	0	27	0	12	15
OTU_263	Archaea	Thaumarchaeota	Marine Group I	uncultured marine group I thaumarchaeote	uncultured marine group I thaumarchaeote	uncultured marine group I thaumarchaeote	uncultured marine group I thaumarchaeote	0	0	1	3	3	2	0	1	0	0	1	0	0	0	0	0	0	0	0	0	0	2
OTU_264	Archaea	Euryarchaeota	Thermoplasmata	Thermoplasmatales	Marine Group II	Unclassified	Unclassified	1	0	0	0	0	0	3	0	0	0	0	2	1	0	0	0	0	0	0	0	0	0
OTU_265	Archaea	Thaumarchaeota	Marine Group I	Unclassified	Unclassified	Unclassified	Unclassified	0	0	0	0	0	0	0	0	1	2	0	0	0	0	0	0	0	0	1	0	0	0
OTU_266	Archaea	Thaumarchaeota	Marine Group I	Unknown Order	Unknown Family	Candidatus Nitrosopumilus	uncultured archaeon	0	5	0	0	5	9	0	38	33	6	0	10	6	0	0	0	2	67	0	5	1	13
OTU_267	Unclassified	Unclassified	Unclassified	Unclassified	Unclassified	Unclassified	Unclassified	0	0	0	0	0	0	0	0	0	0	0	0	0	0	0	0	0	3	0	0	0	0
OTU_268	Archaea	Euryarchaeota	Thermoplasmata	Thermoplasmatales	Marine Group II	uncultured marine group II euryarchaeote HF500_30A08	uncultured marine group II euryarchaeote HF500_30A08	3	5	14	10	4	2	0	3	5	3	86	0	11	4	0	0	1	0	3	12	25	0
OTU_269	Archaea	Euryarchaeota	Thermoplasmata	Thermoplasmatales	Marine Group III	uncultured marine archaeon	uncultured marine archaeon	0	0	0	0	0	1	0	6	0	0	0	0	1	3	0	1	0	0	0	0	0	0
OTU_27	Archaea	Euryarchaeota	Thermoplasmata	Thermoplasmatales	Marine Group II	uncultured marine group II euryarchaeote HF130_27A09	uncultured marine group II euryarchaeote HF130_27A09	0	35	3	0	12	140	0	31	0	0	0	0	30	2	0	0	2	0	0	24	0	0
OTU_270	Archaea	Thaumarchaeota	AK59	uncultured thaumarchaeote	uncultured thaumarchaeote	uncultured thaumarchaeote	uncultured thaumarchaeote	0	0	0	0	0	1	0	0	0	0	0	0	0	2	0	0	0	0	0	0	0	0
OTU_271	Archaea	Euryarchaeota	Thermoplasmata	Thermoplasmatales	Marine Group II	uncultured marine group II euryarchaeote	uncultured marine group II euryarchaeote	0	0	0	0	0	1	0	0	0	0	0	0	0	2	9	6	23	0	0	0	0	0
OTU_272	Archaea	Euryarchaeota	Thermoplasmata	Thermoplasmatales	Marine Group II	uncultured marine group II euryarchaeote HF130_27A09	uncultured marine group II euryarchaeote HF130_27A09	0	0	0	0	0	0	0	1	0	0	0	0	0	10	0	0	0	0	0	0	0	0
OTU_273	Archaea	Thaumarchaeota	Marine Group I	Unclassified	Unclassified	Unclassified	Unclassified	0	0	0	0	0	0	0	0	0	0	0	0	0	11	3	1	0	0	0	0	0	0
OTU_274	Bacteria	Unclassified	Unclassified	Unclassified	Unclassified	Unclassified	Unclassified	0	0	0	0	0	0	0	0	0	0	0	0	0	4	0	0	0	0	0	0	0	0
OTU_275	Archaea	Euryarchaeota	Thermoplasmata	Thermoplasmatales	Marine Group II	Unclassified	Unclassified	0	0	0	0	0	0	0	1	0	0	0	0	0	0	0	0	0	0	0	0	0	0
OTU_276	Archaea	Unclassified	Unclassified	Unclassified	Unclassified	Unclassified	Unclassified	0	0	0	0	0	0	3	0	0	0	0	0	0	0	0	0	0	0	0	0	0	0
OTU_277	Archaea	Thaumarchaeota	Marine Group I	Unknown Order	Unknown Family	Candidatus Nitrosopelagicus	marine metagenome	0	0	0	0	0	0	13	0	0	0	0	0	0	0	0	0	0	0	0	0	0	0
OTU_278	Archaea	Euryarchaeota	Thermoplasmata	Thermoplasmatales	Marine Group III	uncultured marine archaeon	uncultured marine archaeon	0	0	0	0	0	0	0	1	0	0	0	0	0	0	0	0	0	0	0	0	0	0
OTU_279	Archaea	Aigarchaeota	Terrestrial Hot Spring Gp(THSCG)	uncultured marine archaeon	uncultured marine archaeon	uncultured marine archaeon	uncultured marine archaeon	0	1	1	0	0	0	0	0	0	0	0	0	1	0	0	0	0	0	0	0	0	0
OTU_28	Archaea	Thaumarchaeota	Marine Group I	uncultured marine archaeon	uncultured marine archaeon	uncultured marine archaeon	uncultured marine archaeon	3	84	18	1	0	1	0	4	54	63	44	4	87	7	0	0	0	0	66	0	1	0
OTU_280	Archaea	Thaumarchaeota	Marine Group I	uncultured marine archaeon	uncultured marine archaeon	uncultured marine archaeon	uncultured marine archaeon	0	1	0	0	0	0	0	0	0	0	0	0	1	0	0	0	0	0	0	0	0	0
OTU_281	Archaea	Thaumarchaeota	Marine Group I	uncultured marine archaeon	uncultured marine archaeon	uncultured marine archaeon	uncultured marine archaeon	0	31	26	2	0	3	0	10	7	1	0	0	30	9	0	2	0	0	9	0	0	0
OTU_282	Archaea	Thaumarchaeota	Marine Group I	Unknown Order	Unknown Family	Candidatus Nitrosopumilus	uncultured marine group I thaumarchaeote	0	0	0	1	0	22	0	2	0	0	0	0	0	0	0	0	0	0	0	0	0	0
OTU_283	Archaea	Thaumarchaeota	Marine Group I	Unclassified	Unclassified	Unclassified	Unclassified	0	0	1	0	2	4	0	1	0	0	0	0	0	0	0	1	1	0	0	0	0	0
OTU_284	Archaea	Thaumarchaeota	Marine Group I	uncultured marine archaeon	uncultured marine archaeon	uncultured marine archaeon	uncultured marine archaeon	0	0	0	1	0	2	0	0	0	0	0	0	0	0	0	0	0	0	0	0	0	1
OTU_285	Archaea	Thaumarchaeota	Marine Benthic Group A	uncultured marine archaeon	uncultured marine archaeon	uncultured marine archaeon	uncultured marine archaeon	0	0	0	0	0	1	0	0	0	0	0	0	0	0	0	0	0	0	0	0	0	0
OTU_286	Archaea	Thaumarchaeota	AK59	uncultured marine group I thaumarchaeote	uncultured marine group I thaumarchaeote	uncultured marine group I thaumarchaeote	uncultured marine group I thaumarchaeote	0	0	0	0	1	0	0	0	0	0	0	0	0	0	0	0	0	0	0	0	0	0
OTU_287	Archaea	Woesearchaeota (DHVEG-6)	uncultured euryarchaeote	uncultured euryarchaeote	uncultured euryarchaeote	uncultured euryarchaeote	uncultured euryarchaeote	0	0	0	3	0	0	0	0	0	0	0	0	0	0	0	0	0	0	0	0	0	0
OTU_288	Archaea	Euryarchaeota	Thermoplasmata	Thermoplasmatales	Marine Group II	uncultured marine group II euryarchaeote HF10_36B02	uncultured marine group II euryarchaeote HF10_36B02	68	0	0	0	1	0	77	4	0	0	0	17	0	0	0	0	0	0	0	4	0	0
OTU_289	Archaea	Euryarchaeota	Thermoplasmata	Thermoplasmatales	Marine Group II	uncultured marine group II euryarchaeote HF200_89A11	uncultured marine group II euryarchaeote HF200_89A11	5	0	0	0	0	0	7	1	0	0	0	4	0	0	0	0	0	0	0	0	0	0
OTU_29	Archaea	Euryarchaeota	Thermoplasmata	Thermoplasmatales	Marine Group II	uncultured marine group II euryarchaeote	uncultured marine group II euryarchaeote	2	3	7	0	14	139	0	0	0	0	0	1	8	1	0	1	18	0	0	0	0	0
OTU_290	Archaea	Thaumarchaeota	Soil Crenarchaeotic Group(SCG)	uncultured archaeon	uncultured archaeon	uncultured archaeon	uncultured archaeon	0	0	0	0	0	1	0	0	0	0	0	0	0	0	0	0	0	0	0	0	0	0
OTU_291	Archaea	Thaumarchaeota	Marine Group I	uncultured marine crenarchaeote	uncultured marine crenarchaeote	uncultured marine crenarchaeote	uncultured marine crenarchaeote	0	0	0	0	1	0	0	0	0	0	0	0	0	0	0	0	0	0	0	0	0	0
OTU_292	Archaea	Euryarchaeota	Thermoplasmata	Thermoplasmatales	Marine Group III	uncultured marine archaeon	uncultured marine archaeon	0	1	2	0	0	1	0	5	0	0	0	0	1	5	2	1	0	0	0	1	0	0
OTU_293	Archaea	Euryarchaeota	Thermoplasmata	Thermoplasmatales	Marine Group II	uncultured marine group II euryarchaeote HF200_89A11	uncultured marine group II euryarchaeote HF200_89A11	1	0	0	0	0	0	2	0	0	0	0	0	0	0	0	0	0	0	0	0	0	0
OTU_294	Archaea	Euryarchaeota	Thermoplasmata	Thermoplasmatales	Marine Group II	uncultured marine group II euryarchaeote HF10_20F02	uncultured marine group II euryarchaeote HF10_20F02	0	0	0	0	0	0	0	0	0	0	0	1	0	0	0	0	0	0	0	0	0	0
OTU_295	Archaea	Woesearchaeota (DHVEG-6)	uncultured euryarchaeote	uncultured euryarchaeote	uncultured euryarchaeote	uncultured euryarchaeote	uncultured euryarchaeote	0	0	0	1	0	0	0	0	0	0	0	0	0	0	19	4	7	0	0	0	0	0
OTU_296	Archaea	Thaumarchaeota	Marine Group I	Unknown Order	Unknown Family	Candidatus Nitrosopelagicus	marine metagenome	0	0	0	0	0	0	0	0	0	0	0	1	0	0	0	0	0	0	0	0	0	0
OTU_297	Archaea	Woesearchaeota (DHVEG-6)	uncultured euryarchaeote	uncultured euryarchaeote	uncultured euryarchaeote	uncultured euryarchaeote	uncultured euryarchaeote	0	0	0	0	0	0	0	0	0	0	0	0	0	1	4	0	1	0	0	0	0	0
OTU_298	Archaea	Thaumarchaeota	Marine Benthic Group A	uncultured marine crenarchaeote	uncultured marine crenarchaeote	uncultured marine crenarchaeote	uncultured marine crenarchaeote	0	0	0	0	0	0	0	0	0	0	0	0	0	0	12	0	1	0	0	0	0	0
OTU_299	Archaea	Euryarchaeota	Thermoplasmata	Thermoplasmatales	Marine Group III	uncultured marine archaeon	uncultured marine archaeon	0	0	0	0	0	0	0	0	0	0	0	0	0	1	0	0	0	0	0	0	0	0
OTU_3	Archaea	Euryarchaeota	Thermoplasmata	Thermoplasmatales	Marine Group II	uncultured marine archaeon	uncultured marine archaeon	19	4	3	62	249	420	18	12	0	5	52	49	7	9	0	96	18	0	0	8	24	0
OTU_30	Archaea	Euryarchaeota	Thermoplasmata	Thermoplasmatales	Marine Group III	uncultured archaeon	uncultured archaeon	0	28	11	3	0	0	0	104	0	0	0	2	19	14	0	0	1	0	0	0	0	0
OTU_300	Archaea	Woesearchaeota (DHVEG-6)	Unclassified	Unclassified	Unclassified	Unclassified	Unclassified	0	0	0	0	0	0	0	0	0	0	0	0	0	0	0	5	0	0	0	0	0	0
OTU_301	Archaea	Euryarchaeota	Thermoplasmata	Thermoplasmatales	Marine Group II	uncultured marine group II euryarchaeote HF500_30A08	uncultured marine group II euryarchaeote HF500_30A08	0	0	0	0	0	0	0	0	0	0	0	0	0	183	101	28	33	0	0	2	0	0
OTU_302	Archaea	Thaumarchaeota	Marine Group I	uncultured marine group I thaumarchaeote	uncultured marine group I thaumarchaeote	uncultured marine group I thaumarchaeote	uncultured marine group I thaumarchaeote	0	0	0	0	0	0	0	0	0	0	0	0	0	0	1	0	0	0	0	0	0	0
OTU_303	Archaea	Euryarchaeota	Thermoplasmata	Thermoplasmatales	Marine Group III	uncultured marine archaeon	uncultured marine archaeon	0	2	0	0	0	0	0	3	0	0	0	0	1	14	0	0	0	0	0	0	0	0
OTU_304	Archaea	Thaumarchaeota	Unclassified	Unclassified	Unclassified	Unclassified	Unclassified	0	0	0	0	0	0	0	0	0	0	0	0	0	0	1	0	0	0	0	0	0	0
OTU_305	Archaea	Euryarchaeota	Thermoplasmata	Thermoplasmatales	Marine Group II	uncultured marine group II euryarchaeote HF500_30A08	uncultured marine group II euryarchaeote HF500_30A08	0	2	0	0	0	0	0	0	0	0	0	0	0	0	0	0	0	0	0	0	0	0
OTU_306	Archaea	Woesearchaeota (DHVEG-6)	uncultured archaeon	uncultured archaeon	uncultured archaeon	uncultured archaeon	uncultured archaeon	0	0	0	0	0	0	0	0	0	0	0	0	0	0	0	0	2	0	0	0	0	0
OTU_307	Archaea	Thaumarchaeota	Marine Group I	uncultured marine group I thaumarchaeote	uncultured marine group I thaumarchaeote	uncultured marine group I thaumarchaeote	uncultured marine group I thaumarchaeote	0	5	0	0	0	0	0	0	8	12	0	0	2	0	0	0	0	0	8	0	0	0
OTU_308	Archaea	Thaumarchaeota	Marine Group I	Unclassified	Unclassified	Unclassified	Unclassified	0	0	0	0	0	0	0	0	1	0	0	0	0	0	0	0	0	0	0	0	0	0
OTU_309	Archaea	Thaumarchaeota	Marine Group I	Unclassified	Unclassified	Unclassified	Unclassified	0	0	0	0	0	0	0	0	1	0	0	0	0	0	0	0	0	0	0	0	0	0
OTU_31	Archaea	Euryarchaeota	Thermoplasmata	Thermoplasmatales	Marine Group II	uncultured marine archaeon	uncultured marine archaeon	1	9	6	5	13	21	0	211	0	0	0	0	2	5	0	3	2	0	0	0	0	0
OTU_310	Archaea	Euryarchaeota	Thermoplasmata	Thermoplasmatales	Marine Group III	uncultured marine archaeon	uncultured marine archaeon	0	0	0	0	0	0	0	0	0	0	0	0	0	0	0	0	1	0	0	0	0	0
OTU_311	Archaea	Thaumarchaeota	Marine Group I	Unknown Order	Unknown Family	Candidatus Nitrosopumilus	uncultured archaeon	0	1	0	0	0	0	0	0	0	0	0	3	0	0	0	0	1	0	0	1	0	0
OTU_312	Archaea	Thaumarchaeota	Marine Group I	uncultured marine archaeon	uncultured marine archaeon	uncultured marine archaeon	uncultured marine archaeon	0	48	26	31	0	11	0	5	291	175	0	0	49	16	0	0	0	0	283	1	1	0
OTU_313	Archaea	Thaumarchaeota	Marine Group I	Unclassified	Unclassified	Unclassified	Unclassified	0	0	0	0	1	0	0	0	0	0	0	0	0	0	0	0	0	0	0	0	1	0
OTU_314	Archaea	Thaumarchaeota	Marine Group I	Unclassified	Unclassified	Unclassified	Unclassified	0	2	0	6	4	7	0	2	0	4	6	0	2	0	8	2	1	0	0	0	3	4
OTU_315	Archaea	Thaumarchaeota	Marine Group I	uncultured marine archaeon	uncultured marine archaeon	uncultured marine archaeon	uncultured marine archaeon	2	8	0	0	1	1	0	0	7	15	0	0	13	0	0	1	0	0	14	0	0	0
OTU_316	Archaea	Euryarchaeota	Thermoplasmata	Thermoplasmatales	Marine Group II	uncultured marine group II euryarchaeote HF10_36B02	uncultured marine group II euryarchaeote HF10_36B02	2	0	0	0	0	0	0	0	0	0	0	0	0	0	0	0	0	0	0	0	0	0
OTU_317	Archaea	Thaumarchaeota	Marine Group I	uncultured marine archaeon	uncultured marine archaeon	uncultured marine archaeon	uncultured marine archaeon	0	1	0	0	0	0	0	0	0	0	0	0	0	0	0	0	0	0	0	0	0	0
OTU_318	Archaea	Euryarchaeota	Thermoplasmata	Thermoplasmatales	Marine Group II	uncultured marine group II euryarchaeote HF200_89A11	uncultured marine group II euryarchaeote HF200_89A11	1	0	0	0	0	0	0	0	0	0	0	0	0	0	0	0	0	0	0	0	0	0
OTU_319	Archaea	Euryarchaeota	Thermoplasmata	Thermoplasmatales	Marine Group II	Unclassified	Unclassified	0	0	0	0	0	0	0	0	0	0	0	0	0	0	0	0	0	0	0	0	1	0
OTU_32	Archaea	Woesearchaeota (DHVEG-6)	uncultured euryarchaeote	uncultured euryarchaeote	uncultured euryarchaeote	uncultured euryarchaeote	uncultured euryarchaeote	0	3	7	50	19	12	0	23	0	41	0	0	1	7	10	7	6	0	100	229	0	0
OTU_320	Archaea	Thaumarchaeota	Marine Group I	Unclassified	Unclassified	Unclassified	Unclassified	0	2	7	18	16	10	0	2	0	6	9	0	2	2	0	3	8	0	2	0	4	11
OTU_321	Archaea	Euryarchaeota	Thermoplasmata	Thermoplasmatales	Marine Group III	uncultured marine archaeon	uncultured marine archaeon	1	41	0	0	0	0	0	31	0	0	0	0	15	1	0	0	0	0	0	0	0	0
OTU_322	Archaea	Thaumarchaeota	Marine Benthic Group A	uncultured marine group I thaumarchaeote	uncultured marine group I thaumarchaeote	uncultured marine group I thaumarchaeote	uncultured marine group I thaumarchaeote	0	0	0	0	0	0	0	1	0	0	0	0	0	0	0	0	0	0	0	0	1	0
OTU_323	Archaea	Thaumarchaeota	Marine Group I	Unknown Order	Unknown Family	Candidatus Nitrosopelagicus	uncultured archaeon	0	2	0	0	0	0	0	0	8	1	0	0	0	0	0	0	0	0	1	0	0	0
OTU_324	Archaea	Euryarchaeota	Thermoplasmata	Thermoplasmatales	Marine Group II	Unclassified	Unclassified	0	0	0	0	0	0	0	1	0	0	0	0	0	0	0	0	0	0	0	0	0	0
OTU_325	Unclassified	Unclassified	Unclassified	Unclassified	Unclassified	Unclassified	Unclassified	0	0	0	0	0	0	0	2	0	0	0	0	0	0	0	0	0	0	0	0	0	0
OTU_326	Archaea	Thaumarchaeota	Marine Group I	uncultured marine archaeon	uncultured marine archaeon	uncultured marine archaeon	uncultured marine archaeon	0	10	22	20	7	9	0	4	4	12	12	0	7	9	5	1	1	0	13	0	6	4
OTU_327	Archaea	Euryarchaeota	Thermoplasmata	Thermoplasmatales	Marine Group II	Unclassified	Unclassified	1	1	0	0	0	0	5	0	0	0	0	5	0	0	0	0	0	0	0	0	0	0
OTU_328	Archaea	Euryarchaeota	Thermoplasmata	Thermoplasmatales	Marine Group III	uncultured marine archaeon	uncultured marine archaeon	0	0	0	0	0	0	0	1	0	0	0	0	0	0	0	0	0	0	0	0	0	0
OTU_329	Unclassified	Unclassified	Unclassified	Unclassified	Unclassified	Unclassified	Unclassified	0	0	0	0	0	0	0	4	0	0	0	0	0	0	0	0	0	0	0	0	0	0
OTU_33	Bacteria	Unclassified	Unclassified	Unclassified	Unclassified	Unclassified	Unclassified	0	0	0	0	0	0	0	0	0	0	0	0	0	0	0	0	0	0	0	0	3	107
OTU_330	Unclassified	Unclassified	Unclassified	Unclassified	Unclassified	Unclassified	Unclassified	0	0	0	0	0	0	2	0	0	0	0	0	0	0	0	0	0	0	0	0	0	0
OTU_331	Archaea	Thaumarchaeota	Marine Group I	Unclassified	Unclassified	Unclassified	Unclassified	0	0	1	5	5	1	0	0	0	0	0	0	0	0	2	0	2	0	0	0	0	9
OTU_332	Archaea	Euryarchaeota	Thermoplasmata	Thermoplasmatales	Marine Group II	uncultured marine group II euryarchaeote HF500_30A08	uncultured marine group II euryarchaeote HF500_30A08	0	0	0	0	0	0	0	1	0	0	0	0	0	0	0	0	0	0	0	0	0	0
OTU_333	Archaea	Woesearchaeota (DHVEG-6)	uncultured euryarchaeote	uncultured euryarchaeote	uncultured euryarchaeote	uncultured euryarchaeote	uncultured euryarchaeote	0	0	0	0	0	1	0	0	0	0	0	0	0	0	0	0	0	0	0	0	0	0
OTU_334	Archaea	Euryarchaeota	Methanomicrobia	Methanosarcinales	Methanosarcinaceae	Methanosarcina	Unclassified	0	0	0	0	0	0	0	0	0	0	0	0	0	0	0	0	0	0	1	0	0	6
OTU_335	Archaea	Thaumarchaeota	Marine Benthic Group A	uncultured marine group I thaumarchaeote	uncultured marine group I thaumarchaeote	uncultured marine group I thaumarchaeote	uncultured marine group I thaumarchaeote	0	1	1	0	0	0	0	0	132	13	4	0	1	0	0	0	0	0	11	0	5	11
OTU_336	Archaea	Euryarchaeota	Thermoplasmata	Thermoplasmatales	Marine Group II	uncultured marine group II euryarchaeote HF200_66A10	uncultured marine group II euryarchaeote HF200_66A10	0	0	0	0	1	0	0	0	0	0	0	0	2	0	0	0	0	0	0	0	0	0
OTU_337	Archaea	Thaumarchaeota	Marine Group I	unidentified archaeon	unidentified archaeon	unidentified archaeon	unidentified archaeon	0	0	0	0	0	0	0	0	1	0	0	0	0	0	0	0	0	0	0	0	0	0
OTU_338	Archaea	Thaumarchaeota	Marine Group I	Unclassified	Unclassified	Unclassified	Unclassified	0	0	1	0	0	0	0	0	0	0	0	0	0	0	0	0	0	0	0	0	0	0
OTU_339	Archaea	Thaumarchaeota	Marine Group I	uncultured marine group I thaumarchaeote	uncultured marine group I thaumarchaeote	uncultured marine group I thaumarchaeote	uncultured marine group I thaumarchaeote	0	0	7	23	23	17	0	2	0	33	4	0	0	4	0	3	5	0	0	2	76	70
OTU_34	Archaea	Woesearchaeota (DHVEG-6)	uncultured euryarchaeote	uncultured euryarchaeote	uncultured euryarchaeote	uncultured euryarchaeote	uncultured euryarchaeote	0	1	1	8	11	0	0	0	0	0	0	0	0	1	0	0	5	0	0	113	0	0
OTU_340	Archaea	Thaumarchaeota	Marine Group I	Unclassified	Unclassified	Unclassified	Unclassified	0	0	0	1	0	0	0	0	0	0	0	0	0	0	0	0	0	0	0	0	0	0
OTU_341	Archaea	Thaumarchaeota	Marine Group I	Unknown Order	Unknown Family	Candidatus Nitrosopumilus	Unclassified	0	0	0	1	0	0	0	0	0	0	0	0	0	0	0	0	0	0	0	0	0	0
OTU_342	Archaea	Euryarchaeota	Thermoplasmata	Thermoplasmatales	Marine Group II	uncultured marine group II euryarchaeote HF200_89A11	uncultured marine group II euryarchaeote HF200_89A11	5	0	0	0	0	0	0	0	0	0	0	2	0	0	0	0	0	0	0	0	0	0
OTU_343	Archaea	Thaumarchaeota	Marine Group I	uncultured marine archaeon	uncultured marine archaeon	uncultured marine archaeon	uncultured marine archaeon	0	0	1	0	0	0	0	0	0	0	0	0	0	0	0	0	0	0	0	0	0	0
OTU_344	Archaea	Thaumarchaeota	Marine Group I	Unclassified	Unclassified	Unclassified	Unclassified	0	0	0	0	0	0	0	0	0	0	0	0	0	0	0	0	0	0	0	0	0	1
OTU_345	Archaea	Thaumarchaeota	Marine Group I	Unclassified	Unclassified	Unclassified	Unclassified	1	4	1	0	0	0	1	0	13	6	0	0	0	0	0	0	0	0	7	0	0	0
OTU_346	Archaea	Thaumarchaeota	Marine Group I	Unclassified	Unclassified	Unclassified	Unclassified	0	1	1	0	0	0	0	0	2	1	0	0	0	0	0	0	0	0	1	0	0	0
OTU_347	Archaea	Thaumarchaeota	Marine Group I	Unclassified	Unclassified	Unclassified	Unclassified	0	0	0	0	0	0	0	0	0	0	1	0	0	0	0	0	0	0	0	0	0	0
OTU_348	Archaea	Thaumarchaeota	Marine Group I	uncultured marine archaeon	uncultured marine archaeon	uncultured marine archaeon	uncultured marine archaeon	0	5	11	11	4	1	0	6	4	5	19	1	6	5	0	2	0	0	9	1	5	4
OTU_349	Archaea	Thaumarchaeota	Marine Group I	Unclassified	Unclassified	Unclassified	Unclassified	0	0	0	0	0	0	0	0	1	2	0	0	0	0	0	0	0	0	0	0	0	0
OTU_35	Archaea	Euryarchaeota	Thermoplasmata	Thermoplasmatales	Marine Group II	uncultured marine archaeon	uncultured marine archaeon	118	0	0	0	0	2	94	0	0	0	0	98	0	0	0	0	0	0	0	0	0	0
OTU_350	Archaea	Euryarchaeota	Thermoplasmata	Thermoplasmatales	Marine Group II	uncultured marine archaeon	uncultured marine archaeon	0	0	0	0	0	0	0	7	0	0	0	0	0	1	20	1	2	0	0	0	0	0
OTU_351	Archaea	Euryarchaeota	Thermoplasmata	Thermoplasmatales	Marine Group II	uncultured marine group II euryarchaeote HF130_27A09	uncultured marine group II euryarchaeote HF130_27A09	0	0	0	0	0	0	0	0	0	0	0	0	0	3	0	10	0	0	0	0	0	0
OTU_352	Archaea	Euryarchaeota	Thermoplasmata	Thermoplasmatales	Marine Group III	uncultured marine archaeon	uncultured marine archaeon	0	0	0	0	0	0	0	0	0	0	0	0	0	0	0	0	1	0	0	0	0	0
OTU_353	Archaea	Woesearchaeota (DHVEG-6)	uncultured archaeon	uncultured archaeon	uncultured archaeon	uncultured archaeon	uncultured archaeon	0	0	0	0	0	0	0	0	0	0	0	0	0	0	0	0	6	0	0	0	0	0
OTU_354	Archaea	Woesearchaeota (DHVEG-6)	Unclassified	Unclassified	Unclassified	Unclassified	Unclassified	0	0	0	0	0	0	0	0	0	0	0	0	0	0	0	0	1	0	0	0	0	0
OTU_355	Archaea	Thaumarchaeota	Marine Benthic Group A	uncultured marine group I thaumarchaeote	uncultured marine group I thaumarchaeote	uncultured marine group I thaumarchaeote	uncultured marine group I thaumarchaeote	0	1	0	0	0	0	0	0	5	1	0	0	1	0	0	0	0	0	0	0	0	0
OTU_356	Archaea	Thaumarchaeota	Marine Benthic Group A	uncultured marine group I thaumarchaeote	uncultured marine group I thaumarchaeote	uncultured marine group I thaumarchaeote	uncultured marine group I thaumarchaeote	0	0	0	0	0	0	0	0	1	0	0	0	0	0	0	0	0	0	0	0	0	0
OTU_357	Archaea	Thaumarchaeota	Marine Group I	uncultured marine group I thaumarchaeote	uncultured marine group I thaumarchaeote	uncultured marine group I thaumarchaeote	uncultured marine group I thaumarchaeote	0	22	154	533	628	371	0	66	67	704	339	0	20	62	3	187	139	3	62	25	746	2143
OTU_358	Archaea	Thaumarchaeota	Marine Group I	Unclassified	Unclassified	Unclassified	Unclassified	0	0	0	0	0	0	0	0	1	0	0	0	0	0	0	0	0	0	0	0	0	0
OTU_359	Archaea	Euryarchaeota	Thermoplasmata	Thermoplasmatales	Marine Group II	uncultured marine group II euryarchaeote HF500_30A08	uncultured marine group II euryarchaeote HF500_30A08	0	0	1	0	0	1	0	0	0	0	0	0	0	3	3	4	2	0	0	0	0	0
OTU_36	Archaea	Thaumarchaeota	Marine Group I	Unclassified	Unclassified	Unclassified	Unclassified	0	52	28	0	2	4	0	45	111	80	0	0	24	12	0	0	0	0	38	20	1	0
OTU_360	Archaea	Woesearchaeota (DHVEG-6)	uncultured euryarchaeote	uncultured euryarchaeote	uncultured euryarchaeote	uncultured euryarchaeote	uncultured euryarchaeote	0	0	0	0	0	0	0	0	0	0	0	0	0	0	0	0	2	0	0	0	0	0
OTU_361	Archaea	Thaumarchaeota	AK59	uncultured marine archaeon	uncultured marine archaeon	uncultured marine archaeon	uncultured marine archaeon	0	0	0	0	0	0	0	0	0	0	0	0	0	16	0	0	0	0	0	0	0	0
OTU_362	Archaea	Euryarchaeota	Thermoplasmata	Thermoplasmatales	Marine Group III	uncultured euryarchaeote	uncultured euryarchaeote	0	0	6	0	0	0	0	13	0	0	0	0	0	30	0	0	0	0	0	0	0	0
OTU_363	Archaea	Thaumarchaeota	Marine Group I	Unclassified	Unclassified	Unclassified	Unclassified	0	0	0	0	0	0	0	0	0	0	0	0	0	0	0	0	0	0	0	0	0	1
OTU_364	Archaea	Thaumarchaeota	Marine Group I	Unclassified	Unclassified	Unclassified	Unclassified	0	0	0	0	1	0	0	0	0	1	0	0	0	0	0	0	0	0	0	0	0	0
OTU_365	Archaea	Thaumarchaeota	Marine Benthic Group A	uncultured marine group I thaumarchaeote	uncultured marine group I thaumarchaeote	uncultured marine group I thaumarchaeote	uncultured marine group I thaumarchaeote	0	0	0	0	0	0	0	0	0	0	0	0	0	0	0	0	0	0	0	0	0	2
OTU_366	Archaea	Thaumarchaeota	Marine Group I	Unclassified	Unclassified	Unclassified	Unclassified	0	0	0	0	0	0	0	0	0	0	0	0	0	0	0	0	0	0	0	0	0	1
OTU_367	Archaea	Woesearchaeota (DHVEG-6)	uncultured euryarchaeote	uncultured euryarchaeote	uncultured euryarchaeote	uncultured euryarchaeote	uncultured euryarchaeote	0	0	0	0	0	0	0	0	0	0	0	0	0	0	0	0	1	0	0	0	0	0
OTU_368	Archaea	Thaumarchaeota	Marine Group I	Unclassified	Unclassified	Unclassified	Unclassified	0	4	1	0	0	0	0	0	67	33	0	0	9	0	0	0	0	0	32	0	0	0
OTU_369	Archaea	Euryarchaeota	Thermoplasmata	Thermoplasmatales	Marine Group II	uncultured marine microorganism HF200_10-06-02	uncultured marine microorganism HF200_10-06-02	0	0	0	0	0	0	0	0	0	0	0	0	0	0	0	0	0	0	1	0	0	0
OTU_37	Archaea	Euryarchaeota	Thermoplasmata	Thermoplasmatales	Marine Group II	uncultured archaeon	uncultured archaeon	1	3	11	6	28	43	0	338	0	0	0	0	0	18	0	9	25	0	0	102	0	0
OTU_370	Archaea	Euryarchaeota	Thermoplasmata	Thermoplasmatales	Marine Group II	uncultured marine group II euryarchaeote HF10_20F02	uncultured marine group II euryarchaeote HF10_20F02	5	0	0	0	0	0	1	0	0	0	1	1	0	0	0	0	0	12	0	4	0	0
OTU_371	Unclassified	Unclassified	Unclassified	Unclassified	Unclassified	Unclassified	Unclassified	0	0	0	0	0	0	0	0	0	0	0	0	0	0	0	0	0	0	0	1	0	0
OTU_372	Archaea	Woesearchaeota (DHVEG-6)	uncultured euryarchaeote	uncultured euryarchaeote	uncultured euryarchaeote	uncultured euryarchaeote	uncultured euryarchaeote	0	0	0	0	0	0	0	0	0	0	0	0	0	0	0	0	0	1	0	0	0	0
OTU_373	Archaea	Thaumarchaeota	Marine Group I	Unclassified	Unclassified	Unclassified	Unclassified	0	2	2	2	1	1	0	1	1	1	0	0	4	2	0	0	0	1	4	0	0	3
OTU_374	Archaea	Thaumarchaeota	Marine Group I	Unclassified	Unclassified	Unclassified	Unclassified	0	0	0	0	0	0	0	0	0	1	0	0	0	0	0	0	0	0	0	0	0	0
OTU_375	Archaea	Euryarchaeota	Thermoplasmata	Thermoplasmatales	Marine Group II	uncultured marine group II euryarchaeote	uncultured marine group II euryarchaeote	0	0	0	0	0	0	0	0	0	0	0	0	0	6	2	0	0	0	0	0	0	0
OTU_376	Archaea	Euryarchaeota	Thermoplasmata	Thermoplasmatales	Marine Group III	uncultured marine archaeon	uncultured marine archaeon	0	0	0	14	5	17	0	94	0	0	0	0	1	33	10	4	15	0	0	1	0	0
OTU_377	Archaea	Euryarchaeota	Methanobacteria	Methanobacteriales	Methanobacteriaceae	Methanobrevibacter	uncultured methanogenic archaeon	0	0	0	0	0	0	0	0	0	0	0	0	0	0	0	6	0	0	0	0	0	0
OTU_378	Archaea	Woesearchaeota (DHVEG-6)	uncultured euryarchaeote	uncultured euryarchaeote	uncultured euryarchaeote	uncultured euryarchaeote	uncultured euryarchaeote	0	0	0	0	0	0	0	0	0	0	0	0	0	0	0	0	0	1	0	0	0	0
OTU_379	Archaea	Woesearchaeota (DHVEG-6)	uncultured euryarchaeote	uncultured euryarchaeote	uncultured euryarchaeote	uncultured euryarchaeote	uncultured euryarchaeote	0	0	0	0	0	0	0	0	0	0	0	0	0	1	2	0	1	0	0	0	0	0
OTU_38	Archaea	Unclassified	Unclassified	Unclassified	Unclassified	Unclassified	Unclassified	0	0	0	0	0	0	0	0	0	0	0	0	0	0	0	0	0	0	99	1	0	0
OTU_380	Archaea	Euryarchaeota	Thermoplasmata	Thermoplasmatales	Marine Group II	uncultured marine group II euryarchaeote HF200_89A11	uncultured marine group II euryarchaeote HF200_89A11	7	0	0	0	0	0	9	1	0	0	0	4	0	0	0	0	0	1	0	0	0	0
OTU_381	Archaea	Thaumarchaeota	Unclassified	Unclassified	Unclassified	Unclassified	Unclassified	0	0	0	0	0	0	0	0	0	0	0	0	1	0	0	0	0	0	0	0	0	0
OTU_382	Archaea	Euryarchaeota	Thermoplasmata	Thermoplasmatales	Marine Group II	uncultured marine group II euryarchaeote HF70_91G08	uncultured marine group II euryarchaeote HF70_91G08	340	114	12	35	137	174	300	97	0	73	65	253	100	8	0	32	67	0	0	15	93	0
OTU_383	Archaea	Thaumarchaeota	Marine Group I	uncultured marine group I thaumarchaeote	uncultured marine group I thaumarchaeote	uncultured marine group I thaumarchaeote	uncultured marine group I thaumarchaeote	0	0	0	0	0	0	0	3	0	0	0	0	0	5	4	1	0	0	0	0	0	0
OTU_384	Archaea	Thaumarchaeota	Marine Group I	Unclassified	Unclassified	Unclassified	Unclassified	0	0	0	0	0	0	0	0	0	0	0	0	0	1	0	0	0	0	0	0	0	0
OTU_385	Unclassified	Unclassified	Unclassified	Unclassified	Unclassified	Unclassified	Unclassified	0	0	0	0	0	0	0	1	0	0	0	0	0	0	0	0	0	0	0	0	0	0
OTU_386	Archaea	Euryarchaeota	Thermoplasmata	Thermoplasmatales	Marine Group II	uncultured marine group II euryarchaeote HF200_89A11	uncultured marine group II euryarchaeote HF200_89A11	1	0	0	0	0	0	0	0	0	0	0	4	0	0	0	0	0	0	0	0	0	0
OTU_387	Archaea	Euryarchaeota	Thermoplasmata	Thermoplasmatales	Marine Group II	uncultured marine group II euryarchaeote HF200_89A11	uncultured marine group II euryarchaeote HF200_89A11	0	0	0	0	0	0	0	0	0	0	0	1	0	0	0	0	0	0	0	0	0	0
OTU_388	Archaea	Thaumarchaeota	Marine Group I	Unclassified	Unclassified	Unclassified	Unclassified	0	0	0	0	0	0	0	0	0	0	0	0	0	1	0	0	0	0	0	0	0	0
OTU_389	Archaea	Thaumarchaeota	Marine Group I	uncultured archaeon	uncultured archaeon	uncultured archaeon	uncultured archaeon	0	0	0	0	0	1	0	0	0	0	0	0	0	0	0	0	0	0	0	0	0	0
OTU_39	Archaea	Woesearchaeota (DHVEG-6)	uncultured euryarchaeote	uncultured euryarchaeote	uncultured euryarchaeote	uncultured euryarchaeote	uncultured euryarchaeote	0	0	0	0	0	0	0	0	0	0	0	0	0	0	0	0	0	331	0	0	0	0
OTU_390	Archaea	Woesearchaeota (DHVEG-6)	Unclassified	Unclassified	Unclassified	Unclassified	Unclassified	0	0	0	0	0	1	0	0	0	0	0	0	0	0	0	0	0	0	0	0	0	0
OTU_391	Archaea	Thaumarchaeota	Marine Group I	uncultured marine archaeon	uncultured marine archaeon	uncultured marine archaeon	uncultured marine archaeon	1	36	0	0	1	0	0	0	22	18	1	0	37	0	0	0	0	0	17	0	0	0
OTU_392	Archaea	Thaumarchaeota	Marine Group I	uncultured marine group I thaumarchaeote	uncultured marine group I thaumarchaeote	uncultured marine group I thaumarchaeote	uncultured marine group I thaumarchaeote	0	7	22	0	2	0	0	4	5	1	0	0	8	6	0	0	0	0	12	1	0	0
OTU_393	Archaea	Euryarchaeota	Thermoplasmata	Thermoplasmatales	Marine Group II	Unclassified	Unclassified	0	0	0	0	0	0	0	0	0	0	0	0	0	1	0	0	0	0	0	0	0	0
OTU_394	Archaea	Thaumarchaeota	Marine Group I	Unknown Order	Unknown Family	Candidatus Nitrosopelagicus	uncultured thaumarchaeote	2	1	1	0	0	0	26	0	1	0	2	22	0	0	0	0	0	13	0	0	0	2
OTU_395	Archaea	Woesearchaeota (DHVEG-6)	uncultured archaeon	uncultured archaeon	uncultured archaeon	uncultured archaeon	uncultured archaeon	0	0	0	2	0	1	0	0	0	0	0	0	0	0	0	1	1	0	0	0	1	0
OTU_396	Archaea	Euryarchaeota	Thermoplasmata	Thermoplasmatales	Marine Group II	uncultured deep-sea archaeon	uncultured deep-sea archaeon	0	0	0	0	0	0	0	0	0	0	0	0	0	1	0	0	0	0	0	0	0	0
OTU_397	Archaea	Aigarchaeota	Terrestrial Hot Spring Gp(THSCG)	uncultured marine archaeon	uncultured marine archaeon	uncultured marine archaeon	uncultured marine archaeon	0	0	2	0	0	0	0	0	0	0	0	0	0	6	0	0	0	0	0	0	0	0
OTU_398	Archaea	Thaumarchaeota	Marine Group I	unidentified archaeon	unidentified archaeon	unidentified archaeon	unidentified archaeon	0	1	0	0	0	0	0	0	0	0	0	0	0	9	0	0	0	0	0	0	0	0
OTU_399	Archaea	Euryarchaeota	Thermoplasmata	Thermoplasmatales	Marine Group III	uncultured marine archaeon	uncultured marine archaeon	0	0	0	0	0	0	0	1	0	0	0	0	1	13	1	0	8	0	0	0	0	0
OTU_4	Archaea	Euryarchaeota	Thermoplasmata	Thermoplasmatales	Marine Group II	uncultured marine group II euryarchaeote HF10_20F02	uncultured marine group II euryarchaeote HF10_20F02	462	0	3	0	1	6	313	98	69	1	47	444	9	0	0	0	2	1188	3	334	0	0
OTU_40	Archaea	Euryarchaeota	Thermoplasmata	Thermoplasmatales	Marine Group II	uncultured archaeon	uncultured archaeon	34	7	5	0	0	1	20	68	0	0	0	97	9	3	0	0	0	0	0	0	0	0
OTU_400	Archaea	Thaumarchaeota	Marine Group I	Unknown Order	Unknown Family	Candidatus Nitrosopelagicus	Unclassified	1	47	0	0	0	0	0	0	43	27	0	0	38	0	0	0	0	0	22	0	0	0
OTU_401	Archaea	Thaumarchaeota	Unclassified	Unclassified	Unclassified	Unclassified	Unclassified	0	0	1	0	2	1	0	0	0	0	1	0	0	0	0	2	0	0	0	0	1	1
OTU_402	Archaea	Euryarchaeota	Thermoplasmata	Thermoplasmatales	Marine Group II	uncultured marine group II euryarchaeote HF70_91G08	uncultured marine group II euryarchaeote HF70_91G08	0	0	0	0	0	0	0	0	0	0	0	1	0	0	0	0	0	0	0	0	0	0
OTU_403	Archaea	Euryarchaeota	Thermoplasmata	Thermoplasmatales	Marine Group II	uncultured marine group II euryarchaeote HF130_27A09	uncultured marine group II euryarchaeote HF130_27A09	0	1	0	0	0	0	0	0	0	0	0	2	0	0	0	0	0	0	0	0	0	0
OTU_404	Archaea	Euryarchaeota	Thermoplasmata	Thermoplasmatales	Marine Group III	uncultured marine archaeon	uncultured marine archaeon	0	0	0	0	0	0	0	0	0	0	0	0	1	0	0	0	0	0	0	0	0	0
OTU_405	Archaea	Woesearchaeota (DHVEG-6)	uncultured euryarchaeote	uncultured euryarchaeote	uncultured euryarchaeote	uncultured euryarchaeote	uncultured euryarchaeote	0	0	0	0	0	0	0	0	0	0	0	0	0	0	1	1	3	0	0	0	0	0
OTU_406	Archaea	Woesearchaeota (DHVEG-6)	Unclassified	Unclassified	Unclassified	Unclassified	Unclassified	0	0	0	0	0	0	0	0	0	0	0	0	0	0	0	0	3	0	0	0	0	0
OTU_407	Archaea	Euryarchaeota	Methanomicrobia	Methanosarcinales	Methanosaetaceae	Methanosaeta	Unclassified	0	0	0	0	0	0	0	0	0	0	0	0	0	0	0	0	0	1	0	0	0	1
OTU_408	Archaea	Thaumarchaeota	Marine Group I	uncultured marine archaeon	uncultured marine archaeon	uncultured marine archaeon	uncultured marine archaeon	0	0	0	0	2	1	0	0	0	0	0	0	0	0	0	1	0	0	0	0	0	0
OTU_409	Archaea	Thaumarchaeota	Marine Benthic Group A	uncultured crenarchaeote	uncultured crenarchaeote	uncultured crenarchaeote	uncultured crenarchaeote	0	0	0	0	0	0	0	0	0	0	0	0	0	0	0	0	1	0	0	0	0	0
OTU_41	Archaea	Thaumarchaeota	Marine Benthic Group A	uncultured marine crenarchaeote	uncultured marine crenarchaeote	uncultured marine crenarchaeote	uncultured marine crenarchaeote	0	4	3	2	3	3	0	0	103	0	0	0	4	7	0	0	2	0	0	0	2	0
OTU_410	Archaea	Thaumarchaeota	Marine Benthic Group A	uncultured marine group I thaumarchaeote	uncultured marine group I thaumarchaeote	uncultured marine group I thaumarchaeote	uncultured marine group I thaumarchaeote	0	0	0	0	0	0	0	0	1	0	0	0	0	0	0	0	0	0	0	0	0	0
OTU_411	Archaea	Euryarchaeota	Thermoplasmata	Thermoplasmatales	Marine Group II	uncultured marine group II euryarchaeote HF10_36B02	uncultured marine group II euryarchaeote HF10_36B02	1	0	0	0	0	0	0	0	0	0	0	0	0	0	0	0	0	0	0	0	0	0
OTU_412	Archaea	Euryarchaeota	Thermoplasmata	Thermoplasmatales	Marine Group II	uncultured marine microorganism HF200_10-06-02	uncultured marine microorganism HF200_10-06-02	0	1	0	0	0	0	0	0	0	0	0	0	0	0	0	0	0	0	0	0	0	0
OTU_413	Archaea	Thaumarchaeota	Marine Group I	Unclassified	Unclassified	Unclassified	Unclassified	0	2	0	0	0	0	0	0	0	0	0	0	0	0	0	0	0	0	0	0	0	0
OTU_414	Archaea	Thaumarchaeota	Marine Group I	uncultured thaumarchaeote	uncultured thaumarchaeote	uncultured thaumarchaeote	uncultured thaumarchaeote	0	0	1	0	0	0	0	0	0	0	0	0	0	0	0	0	0	0	0	0	0	0
OTU_415	Archaea	Woesearchaeota (DHVEG-6)	uncultured euryarchaeote	uncultured euryarchaeote	uncultured euryarchaeote	uncultured euryarchaeote	uncultured euryarchaeote	0	0	0	2	0	0	0	0	0	0	0	0	0	0	0	0	0	0	0	0	0	0
OTU_416	Archaea	Euryarchaeota	Thermoplasmata	Thermoplasmatales	Marine Group III	uncultured archaeon	uncultured archaeon	0	0	3	6	2	4	0	1	0	0	0	0	0	0	0	2	1	0	0	1	0	0
OTU_417	Archaea	Thaumarchaeota	Marine Group I	uncultured marine group I thaumarchaeote	uncultured marine group I thaumarchaeote	uncultured marine group I thaumarchaeote	uncultured marine group I thaumarchaeote	0	0	1	10	20	14	0	1	0	1	6	0	0	0	0	1	3	0	0	0	6	9
OTU_418	Archaea	Euryarchaeota	Thermoplasmata	Thermoplasmatales	Marine Group II	uncultured deep-sea archaeon	uncultured deep-sea archaeon	0	1	1	0	0	1	0	0	0	0	0	0	0	0	0	0	0	0	0	0	0	0
OTU_419	Archaea	Euryarchaeota	Thermoplasmata	Thermoplasmatales	Marine Group II	uncultured marine group II euryarchaeote HF70_91G08	uncultured marine group II euryarchaeote HF70_91G08	0	0	0	0	0	0	1	0	0	0	0	5	0	0	0	0	0	0	0	0	0	0
OTU_42	Bacteria	Planctomycetes	OM190	uncultured planctomycete	uncultured planctomycete	uncultured planctomycete	uncultured planctomycete	0	0	0	0	0	0	0	0	0	9	0	0	0	0	0	0	0	0	22	0	0	2
OTU_420	Archaea	Euryarchaeota	Thermoplasmata	Thermoplasmatales	Marine Group III	uncultured marine archaeon	uncultured marine archaeon	0	0	0	0	0	0	0	2	0	0	0	0	0	0	0	0	0	0	0	0	0	0
OTU_421	Archaea	Euryarchaeota	Thermoplasmata	Thermoplasmatales	Marine Group II	Unclassified	Unclassified	0	2	0	0	1	0	0	0	1	0	0	0	6	0	0	0	0	0	0	0	0	0
OTU_422	Archaea	Euryarchaeota	Thermoplasmata	Thermoplasmatales	Marine Group II	uncultured marine group II euryarchaeote HF130_27A09	uncultured marine group II euryarchaeote HF130_27A09	0	0	0	0	0	0	0	1	0	0	0	0	0	4	0	0	0	0	0	0	0	0
OTU_423	Archaea	Thaumarchaeota	Marine Group I	Unclassified	Unclassified	Unclassified	Unclassified	0	0	0	0	0	0	0	0	0	0	0	0	0	60	81	20	8	0	0	0	0	0
OTU_424	Archaea	Thaumarchaeota	Marine Group I	uncultured thaumarchaeote	uncultured thaumarchaeote	uncultured thaumarchaeote	uncultured thaumarchaeote	0	1	0	0	0	0	0	0	0	2	0	0	0	0	0	0	0	0	0	0	0	0
OTU_425	Archaea	Thaumarchaeota	AK59	uncultured marine group I thaumarchaeote	uncultured marine group I thaumarchaeote	uncultured marine group I thaumarchaeote	uncultured marine group I thaumarchaeote	0	0	0	0	0	4	0	0	0	0	0	0	0	0	1	0	1	0	0	0	0	0
OTU_426	Archaea	Euryarchaeota	Thermoplasmata	Thermoplasmatales	Marine Group III	uncultured archaeon	uncultured archaeon	0	0	0	0	0	0	0	0	0	0	0	0	0	0	0	1	0	0	0	0	0	0
OTU_427	Archaea	Euryarchaeota	Thermoplasmata	Thermoplasmatales	Marine Group II	Unclassified	Unclassified	0	0	0	0	0	0	0	0	0	0	0	2	0	0	0	0	0	0	0	0	0	0
OTU_428	Archaea	Euryarchaeota	Thermoplasmata	Thermoplasmatales	Marine Group III	uncultured marine archaeon	uncultured marine archaeon	0	0	0	0	0	0	0	0	0	0	0	0	0	5	4	0	0	0	0	8	0	0
OTU_429	Archaea	Euryarchaeota	Thermoplasmata	Thermoplasmatales	Marine Group III	uncultured marine archaeon	uncultured marine archaeon	0	0	0	1	4	3	0	0	0	0	0	0	0	15	18	52	77	0	0	4	0	0
OTU_43	Unclassified	Unclassified	Unclassified	Unclassified	Unclassified	Unclassified	Unclassified	0	0	0	0	0	0	0	2	0	0	0	0	0	0	0	0	0	0	0	50	0	0
OTU_430	Archaea	Euryarchaeota	Thermoplasmata	Thermoplasmatales	Marine Group II	uncultured marine group II euryarchaeote HF500_30A08	uncultured marine group II euryarchaeote HF500_30A08	0	0	0	0	0	0	0	0	3	0	0	0	1	0	0	0	0	0	0	0	0	0
OTU_431	Archaea	Thaumarchaeota	Marine Group I	Unclassified	Unclassified	Unclassified	Unclassified	0	0	0	3	1	2	0	0	0	1	1	0	0	1	0	0	0	0	0	0	0	0
OTU_432	Archaea	Thaumarchaeota	Marine Group I	Unclassified	Unclassified	Unclassified	Unclassified	0	0	0	0	0	0	0	0	0	0	1	0	0	0	0	0	0	0	0	0	0	0
OTU_433	Archaea	Woesearchaeota (DHVEG-6)	uncultured euryarchaeote	uncultured euryarchaeote	uncultured euryarchaeote	uncultured euryarchaeote	uncultured euryarchaeote	0	0	0	0	0	0	0	0	0	0	0	0	0	0	0	0	4	0	0	0	0	0
OTU_434	Archaea	Thaumarchaeota	Marine Group I	uncultured thaumarchaeote	uncultured thaumarchaeote	uncultured thaumarchaeote	uncultured thaumarchaeote	0	0	0	2	1	0	0	0	0	0	0	0	0	0	7	2	1	0	0	0	0	0
OTU_435	Archaea	Thaumarchaeota	pSL12	uncultured marine crenarchaeote AD1000-23-H12	uncultured marine crenarchaeote AD1000-23-H12	uncultured marine crenarchaeote AD1000-23-H12	uncultured marine crenarchaeote AD1000-23-H12	0	0	0	0	0	0	0	0	0	0	0	0	0	1	2	0	1	0	0	0	0	0
OTU_436	Archaea	Thaumarchaeota	Marine Group I	Unclassified	Unclassified	Unclassified	Unclassified	0	0	0	0	0	0	0	0	0	0	0	0	0	1	17	4	0	0	0	0	0	0
OTU_437	Archaea	Woesearchaeota (DHVEG-6)	Unclassified	Unclassified	Unclassified	Unclassified	Unclassified	0	0	0	0	0	0	0	1	0	0	0	0	0	3	2	12	0	0	0	0	0	0
OTU_438	Archaea	Thaumarchaeota	Marine Group I	Unclassified	Unclassified	Unclassified	Unclassified	0	0	0	0	0	0	0	0	0	0	0	0	0	0	0	12	1	0	0	0	0	0
OTU_439	Archaea	Thaumarchaeota	Marine Group I	uncultured marine archaeon	uncultured marine archaeon	uncultured marine archaeon	uncultured marine archaeon	0	0	0	0	0	0	0	0	0	0	0	0	0	4	1	0	0	0	0	0	0	0
OTU_44	Archaea	Euryarchaeota	Thermoplasmata	Thermoplasmatales	Marine Group II	uncultured marine archaeon	uncultured marine archaeon	1	2	1	0	0	0	0	261	0	0	0	0	12	4	0	0	1	0	0	0	0	0
OTU_440	Archaea	Thaumarchaeota	Marine Benthic Group A	uncultured marine group I thaumarchaeote	uncultured marine group I thaumarchaeote	uncultured marine group I thaumarchaeote	uncultured marine group I thaumarchaeote	0	0	1	2	4	2	0	0	5	0	77	0	0	1	0	1	5	0	0	0	10	29
OTU_441	Archaea	Thaumarchaeota	Marine Benthic Group A	uncultured marine archaeon	uncultured marine archaeon	uncultured marine archaeon	uncultured marine archaeon	0	0	0	0	2	0	0	1	0	1	0	0	0	0	7	0	19	0	0	0	0	0
OTU_442	Archaea	Euryarchaeota	Thermoplasmata	Thermoplasmatales	Marine Group III	Unclassified	Unclassified	0	0	0	0	0	0	0	0	0	0	0	0	0	0	0	0	0	0	0	1	0	0
OTU_443	Archaea	Thaumarchaeota	Marine Group I	Unclassified	Unclassified	Unclassified	Unclassified	0	0	0	0	0	0	0	0	0	0	0	0	1	0	0	0	0	0	0	0	0	0
OTU_444	Archaea	Thaumarchaeota	Marine Group I	Unclassified	Unclassified	Unclassified	Unclassified	0	0	0	0	0	0	0	0	0	0	0	0	0	0	0	0	0	0	0	0	1	1
OTU_445	Archaea	Euryarchaeota	Thermoplasmata	Thermoplasmatales	Marine Group II	uncultured marine archaeon	uncultured marine archaeon	0	0	0	0	1	0	0	5	0	0	0	0	0	2	0	1	0	0	0	0	0	0
OTU_446	Archaea	Euryarchaeota	Thermoplasmata	Thermoplasmatales	Marine Group III	uncultured marine archaeon	uncultured marine archaeon	0	0	2	0	0	0	0	11	0	0	0	0	0	0	0	0	0	0	0	0	0	0
OTU_447	Archaea	Euryarchaeota	Thermoplasmata	Thermoplasmatales	Marine Group II	Unclassified	Unclassified	0	0	0	0	0	0	0	0	0	0	0	1	0	0	0	0	0	0	0	0	0	0
OTU_448	Archaea	Euryarchaeota	Thermoplasmata	Thermoplasmatales	Marine Group II	uncultured marine group II euryarchaeote HF200_89A11	uncultured marine group II euryarchaeote HF200_89A11	0	0	0	0	0	0	0	0	0	0	0	1	0	0	0	0	0	0	0	0	0	0
OTU_449	Archaea	Thaumarchaeota	Marine Group I	Unclassified	Unclassified	Unclassified	Unclassified	0	0	0	0	0	0	0	0	1	0	0	0	1	0	0	0	0	0	0	0	0	0
OTU_45	Archaea	Miscellaneous Crenarchaeotic Group	uncultured archaeon	uncultured archaeon	uncultured archaeon	uncultured archaeon	uncultured archaeon	0	0	0	0	0	0	0	0	0	0	478	0	0	0	0	0	0	0	0	0	0	0
OTU_450	Archaea	Euryarchaeota	Thermoplasmata	Thermoplasmatales	Marine Group II	uncultured marine microorganism HF200_10-06-02	uncultured marine microorganism HF200_10-06-02	0	0	0	0	0	0	0	0	0	0	0	0	1	0	0	0	0	0	0	0	0	0
OTU_451	Archaea	Euryarchaeota	Thermoplasmata	Thermoplasmatales	Marine Group II	Unclassified	Unclassified	1	0	0	0	0	0	0	0	0	0	0	0	2	0	0	0	0	0	1	0	0	0
OTU_452	Archaea	Euryarchaeota	Thermoplasmata	Thermoplasmatales	Marine Group II	marine metagenome	marine metagenome	21	0	1	0	0	2	2	2	0	0	0	25	1	0	0	0	0	0	0	0	0	0
OTU_453	Archaea	Euryarchaeota	Thermoplasmata	Thermoplasmatales	Marine Group II	uncultured marine group II euryarchaeote HF10_20F02	uncultured marine group II euryarchaeote HF10_20F02	0	0	0	0	0	0	0	0	0	0	0	1	0	0	0	0	0	0	0	0	0	0
OTU_454	Archaea	Thaumarchaeota	Marine Group I	uncultured marine archaeon	uncultured marine archaeon	uncultured marine archaeon	uncultured marine archaeon	0	0	0	0	0	0	0	0	0	0	0	0	1	0	0	0	0	0	0	0	0	0
OTU_455	Archaea	Euryarchaeota	Thermoplasmata	Thermoplasmatales	Marine Group II	uncultured marine group II euryarchaeote HF130_17B12	uncultured marine group II euryarchaeote HF130_17B12	0	0	0	0	0	0	0	0	0	0	0	1	0	0	0	0	0	0	0	0	0	0
OTU_456	Archaea	Woesearchaeota (DHVEG-6)	uncultured euryarchaeote	uncultured euryarchaeote	uncultured euryarchaeote	uncultured euryarchaeote	uncultured euryarchaeote	0	0	0	1	1	6	0	0	0	0	0	0	0	0	0	2	4	0	0	0	0	0
OTU_457	Archaea	Euryarchaeota	Thermoplasmata	Thermoplasmatales	Marine Group II	uncultured marine group II euryarchaeote HF130_40G09	uncultured marine group II euryarchaeote HF130_40G09	0	0	0	0	0	0	0	0	0	0	0	1	0	0	0	0	0	0	0	0	0	0
OTU_458	Archaea	Euryarchaeota	Thermoplasmata	Thermoplasmatales	Marine Group II	Unclassified	Unclassified	1	1	11	3	4	3	0	3	0	4	18	0	2	21	1	1	0	0	0	11	6	0
OTU_459	Archaea	Thaumarchaeota	Marine Group I	Unknown Order	Unknown Family	Candidatus Nitrosopelagicus	uncultured marine archaeon DCM871	0	0	0	0	0	0	0	0	1	0	0	0	0	0	0	0	0	0	0	0	0	0
OTU_46	Archaea	Thaumarchaeota	Marine Group I	uncultured marine archaeon	uncultured marine archaeon	uncultured marine archaeon	uncultured marine archaeon	4	156	143	48	24	30	1	139	164	181	0	2	212	95	42	15	3	0	131	1	2	2
OTU_460	Archaea	Thaumarchaeota	Marine Group I	Unclassified	Unclassified	Unclassified	Unclassified	0	0	0	0	0	0	0	0	1	0	0	0	0	0	0	0	0	0	1	0	0	0
OTU_461	Archaea	Thaumarchaeota	Marine Group I	uncultured marine archaeon	uncultured marine archaeon	uncultured marine archaeon	uncultured marine archaeon	0	24	18	10	15	2	0	8	11	30	9	1	37	2	0	0	0	0	21	0	1	5
OTU_462	Archaea	Thaumarchaeota	Marine Group I	Unclassified	Unclassified	Unclassified	Unclassified	0	0	0	0	0	0	0	0	0	1	0	0	0	0	0	0	0	0	0	0	0	0
OTU_463	Unclassified	Unclassified	Unclassified	Unclassified	Unclassified	Unclassified	Unclassified	0	0	0	0	0	0	1	0	0	0	0	0	0	0	0	0	0	0	0	0	0	0
OTU_464	Archaea	Woesearchaeota (DHVEG-6)	archaeon GW2011_AR17	archaeon GW2011_AR17	archaeon GW2011_AR17	archaeon GW2011_AR17	archaeon GW2011_AR17	0	0	0	0	0	0	0	0	0	3	0	0	0	0	0	0	0	0	0	0	0	0
OTU_465	Archaea	Euryarchaeota	Thermoplasmata	Thermoplasmatales	Marine Group III	uncultured marine archaeon	uncultured marine archaeon	0	0	0	0	0	0	0	1	0	0	0	0	0	0	0	0	0	0	0	0	0	0
OTU_466	Archaea	Euryarchaeota	Thermoplasmata	Thermoplasmatales	Marine Group II	uncultured marine group II euryarchaeote HF500_30A08	uncultured marine group II euryarchaeote HF500_30A08	0	1	0	0	0	0	0	0	2	0	0	0	1	0	0	0	0	0	0	1	0	0
OTU_467	Archaea	Thaumarchaeota	Marine Group I	Unclassified	Unclassified	Unclassified	Unclassified	0	1	0	0	0	0	0	0	1	0	0	0	0	0	0	0	0	0	0	0	0	0
OTU_468	Archaea	Euryarchaeota	Methanomicrobia	Methanosarcinales	Methanosaetaceae	Methanosaeta	Unclassified	0	0	0	0	0	0	0	0	0	0	0	0	0	0	0	0	0	1	0	0	0	0
OTU_469	Archaea	Thaumarchaeota	Marine Group I	Unclassified	Unclassified	Unclassified	Unclassified	0	0	0	0	0	0	0	0	2	0	0	0	0	0	0	0	0	0	1	0	0	0
OTU_47	Archaea	Euryarchaeota	Thermoplasmata	Thermoplasmatales	Marine Group II	uncultured marine group II euryarchaeote	uncultured marine group II euryarchaeote	0	0	9	14	63	115	0	0	0	0	0	0	0	1	0	20	39	0	0	0	0	0
OTU_470	Archaea	Thaumarchaeota	Marine Benthic Group A	uncultured marine group I thaumarchaeote	uncultured marine group I thaumarchaeote	uncultured marine group I thaumarchaeote	uncultured marine group I thaumarchaeote	0	0	0	0	0	0	0	0	3	0	0	0	0	0	0	0	0	0	0	0	0	0
OTU_471	Archaea	Thaumarchaeota	Marine Group I	Unknown Order	Unknown Family	Candidatus Nitrosopumilus	uncultured thaumarchaeote	0	0	0	0	0	0	0	0	0	0	0	0	0	0	0	0	0	1	0	0	0	0
OTU_472	Archaea	Woesearchaeota (DHVEG-6)	uncultured euryarchaeote	uncultured euryarchaeote	uncultured euryarchaeote	uncultured euryarchaeote	uncultured euryarchaeote	0	0	0	2	1	0	0	0	0	2	0	0	0	0	23	3	5	0	23	1	0	0
OTU_473	Archaea	Euryarchaeota	Thermoplasmata	Thermoplasmatales	Marine Group III	uncultured archaeon	uncultured archaeon	0	0	0	0	0	0	0	0	0	0	0	0	0	0	2	0	0	0	0	0	0	0
OTU_474	Bacteria	Bacteroidetes	Flavobacteriia	Flavobacteriales	NS9 marine group	uncultured Bacteroidetes bacterium	uncultured Bacteroidetes bacterium	0	0	0	0	0	0	0	0	0	0	0	0	0	0	0	0	0	1	0	0	0	0
OTU_475	Archaea	Thaumarchaeota	Marine Group I	Unclassified	Unclassified	Unclassified	Unclassified	0	0	0	0	0	1	0	0	0	0	0	0	0	0	0	0	0	0	0	0	0	0
OTU_476	Archaea	Euryarchaeota	Thermoplasmata	Thermoplasmatales	Marine Group III	uncultured marine archaeon	uncultured marine archaeon	0	0	0	3	3	2	0	2	0	0	0	0	0	0	0	2	1	0	0	0	0	0
OTU_477	Archaea	Thaumarchaeota	Marine Group I	uncultured thaumarchaeote	uncultured thaumarchaeote	uncultured thaumarchaeote	uncultured thaumarchaeote	0	0	1	0	0	0	0	0	0	0	0	0	0	0	0	1	0	0	0	0	0	0
OTU_478	Archaea	Thaumarchaeota	Marine Group I	uncultured marine archaeon	uncultured marine archaeon	uncultured marine archaeon	uncultured marine archaeon	0	0	1	0	0	0	0	0	0	0	0	0	0	0	0	0	0	0	0	0	0	0
OTU_479	Archaea	Euryarchaeota	Thermoplasmata	Thermoplasmatales	Marine Group II	Unclassified	Unclassified	0	1	2	0	0	0	0	0	0	0	2	0	0	1	0	1	0	0	0	1	0	0
OTU_48	Bacteria	Unclassified	Unclassified	Unclassified	Unclassified	Unclassified	Unclassified	0	0	0	0	0	0	0	0	55	0	0	0	0	0	0	0	0	0	0	0	0	0
OTU_480	Archaea	Thaumarchaeota	F9P122000-Arc-2-E02	uncultured marine archaeon	uncultured marine archaeon	uncultured marine archaeon	uncultured marine archaeon	0	0	0	0	0	1	0	0	1	1	0	0	0	0	0	0	0	0	2	0	0	0
OTU_481	Archaea	Woesearchaeota (DHVEG-6)	unidentified archaeon	unidentified archaeon	unidentified archaeon	unidentified archaeon	unidentified archaeon	0	0	0	0	4	0	0	0	0	0	0	0	0	0	0	0	0	0	0	0	0	0
OTU_482	Archaea	Woesearchaeota (DHVEG-6)	Unclassified	Unclassified	Unclassified	Unclassified	Unclassified	0	0	0	6	0	0	0	0	0	0	0	0	0	0	0	0	0	0	0	0	0	0
OTU_483	Archaea	Thaumarchaeota	Marine Group I	uncultured marine group I thaumarchaeote	uncultured marine group I thaumarchaeote	uncultured marine group I thaumarchaeote	uncultured marine group I thaumarchaeote	0	1	0	2	7	3	0	1	0	0	2	1	2	0	1	2	1	0	0	0	1	2
OTU_484	Archaea	Thaumarchaeota	Marine Group I	Unclassified	Unclassified	Unclassified	Unclassified	0	0	0	0	0	0	0	0	0	0	0	0	0	0	0	0	0	0	0	0	2	1
OTU_485	Archaea	Euryarchaeota	Methanobacteria	Methanobacteriales	Methanobacteriaceae	Methanobacterium	uncultured Methanobacteria archaeron	0	0	0	0	0	0	0	0	0	0	0	0	0	0	0	0	1	0	0	0	0	0
OTU_486	Archaea	Euryarchaeota	Methanomicrobia	Methanosarcinales	Methanosaetaceae	Methanosaeta	uncultured methanogenic archaeon	0	0	0	0	0	0	0	0	0	0	0	0	0	0	0	0	0	2	0	0	0	0
OTU_487	Archaea	Thaumarchaeota	Marine Group I	Unknown Order	Unknown Family	Candidatus Nitrosopumilus	uncultured marine group I thaumarchaeote	0	0	0	0	0	5	0	0	0	0	0	0	0	0	0	1	0	0	0	0	0	0
OTU_488	Archaea	Euryarchaeota	Thermoplasmata	Thermoplasmatales	Marine Group II	Unclassified	Unclassified	1	0	0	0	0	0	0	0	0	0	0	0	0	0	0	0	0	0	0	0	0	0
OTU_489	Archaea	Thaumarchaeota	Marine Group I	Unclassified	Unclassified	Unclassified	Unclassified	0	0	0	0	0	0	0	0	0	0	0	0	0	0	0	0	0	0	0	0	1	0
OTU_49	Archaea	Thaumarchaeota	Marine Group I	Unclassified	Unclassified	Unclassified	Unclassified	15	387	1283	2982	2618	1577	3	564	918	2571	726	8	415	488	37	877	527	3	1326	130	1521	2893
OTU_490	Archaea	Euryarchaeota	Thermoplasmata	Thermoplasmatales	Marine Group II	uncultured marine group II euryarchaeote HF130_27A09	uncultured marine group II euryarchaeote HF130_27A09	0	1	0	0	0	0	0	0	0	0	0	0	0	0	0	0	0	0	0	0	0	0
OTU_491	Archaea	Thaumarchaeota	Marine Group I	uncultured marine archaeon	uncultured marine archaeon	uncultured marine archaeon	uncultured marine archaeon	0	2	1	1	0	3	0	1	0	2	1	0	5	0	0	1	0	0	1	0	2	1
OTU_492	Archaea	Thaumarchaeota	Marine Group I	unidentified archaeon	unidentified archaeon	unidentified archaeon	unidentified archaeon	0	1	0	0	0	0	0	0	0	0	0	0	0	0	0	0	0	0	0	0	0	0
OTU_493	Archaea	Euryarchaeota	Thermoplasmata	Thermoplasmatales	Marine Group II	Unclassified	Unclassified	0	0	0	0	0	0	0	0	0	0	0	0	1	0	0	0	0	0	0	0	0	0
OTU_494	Archaea	Thaumarchaeota	Marine Group I	uncultured marine archaeon	uncultured marine archaeon	uncultured marine archaeon	uncultured marine archaeon	0	0	0	0	0	0	0	0	0	0	0	0	0	2	0	0	0	0	0	0	0	0
OTU_495	Archaea	Euryarchaeota	Thermoplasmata	Thermoplasmatales	Marine Group II	uncultured marine group II euryarchaeote	uncultured marine group II euryarchaeote	0	0	0	0	0	0	0	0	0	0	0	2	0	0	0	0	0	0	0	0	0	0
OTU_496	Archaea	Euryarchaeota	Thermoplasmata	Thermoplasmatales	Marine Group II	uncultured marine group II euryarchaeote HF200_89A11	uncultured marine group II euryarchaeote HF200_89A11	166	0	0	0	0	1	56	8	0	0	0	101	4	0	0	0	0	0	0	0	0	0
OTU_497	Archaea	Euryarchaeota	Thermoplasmata	Thermoplasmatales	Marine Group II	uncultured marine microorganism HF200_10-06-02	uncultured marine microorganism HF200_10-06-02	0	0	0	0	0	0	0	0	0	0	0	0	1	0	0	0	0	0	0	0	0	0
OTU_498	Bacteria	Bacteroidetes	Sphingobacteriia	Sphingobacteriales	Chitinophagaceae	Terrimonas	uncultured Chitinophagaceae bacterium	0	0	0	0	0	0	0	0	0	0	0	0	0	0	0	0	0	1	0	0	0	0
OTU_499	Archaea	Thaumarchaeota	Marine Group I	Unknown Order	Unknown Family	Candidatus Nitrosopelagicus	uncultured thaumarchaeote	1	0	0	0	0	0	13	0	2	0	0	11	0	0	0	0	0	7	0	0	0	1
OTU_5	Archaea	Thaumarchaeota	Marine Group I	Unclassified	Unclassified	Unclassified	Unclassified	0	1	3	5	1	2	0	0	0	4	24	0	0	239	2246	1058	805	0	0	0	1	12
OTU_50	Archaea	Euryarchaeota	Thermoplasmata	Thermoplasmatales	Marine Group II	uncultured marine archaeon	uncultured marine archaeon	51	1	2	2	1	2	22	12	0	0	12	50	0	1	0	1	0	0	0	1	1	0
OTU_500	Archaea	Thaumarchaeota	Marine Group I	uncultured thaumarchaeote	uncultured thaumarchaeote	uncultured thaumarchaeote	uncultured thaumarchaeote	0	20	0	0	0	0	0	0	29	28	0	0	23	0	0	0	0	0	19	0	0	0
OTU_501	Archaea	Woesearchaeota (DHVEG-6)	uncultured euryarchaeote	uncultured euryarchaeote	uncultured euryarchaeote	uncultured euryarchaeote	uncultured euryarchaeote	0	0	0	0	0	0	0	0	0	0	0	0	0	0	0	0	0	2	0	0	0	0
OTU_502	Archaea	Thaumarchaeota	Marine Group I	Unclassified	Unclassified	Unclassified	Unclassified	0	1	0	1	0	0	0	0	1	2	0	0	0	0	0	0	0	0	0	0	0	0
OTU_503	Archaea	Euryarchaeota	Thermoplasmata	Thermoplasmatales	Marine Group II	uncultured marine group II euryarchaeote HF70_91G08	uncultured marine group II euryarchaeote HF70_91G08	0	3	0	0	0	0	0	0	0	2	0	0	0	0	0	0	0	0	0	0	0	0
OTU_504	Archaea	Thaumarchaeota	Marine Group I	Unclassified	Unclassified	Unclassified	Unclassified	0	1	1	0	0	0	0	0	1	2	0	0	2	0	0	0	0	0	10	0	0	0
OTU_505	Archaea	Thaumarchaeota	Marine Group I	Unclassified	Unclassified	Unclassified	Unclassified	0	1	0	0	0	0	1	0	2	0	0	0	0	0	0	0	0	0	1	0	0	1
OTU_506	Archaea	Thaumarchaeota	Marine Group I	Unknown Order	Unknown Family	Candidatus Nitrosopumilus	uncultured crenarchaeote	0	0	1	0	1	8	0	0	0	0	0	0	0	0	3	1	7	0	0	0	0	0
OTU_507	Archaea	Euryarchaeota	Thermoplasmata	Thermoplasmatales	Marine Group II	uncultured marine group II euryarchaeote	uncultured marine group II euryarchaeote	0	0	0	0	0	0	0	0	0	0	0	0	0	0	0	1	0	0	0	0	0	0
OTU_508	Archaea	Thaumarchaeota	Marine Group I	Unclassified	Unclassified	Unclassified	Unclassified	0	0	0	0	0	0	0	0	0	0	0	0	0	0	0	3	0	0	0	0	0	0
OTU_509	Archaea	Thaumarchaeota	Marine Group I	Unclassified	Unclassified	Unclassified	Unclassified	0	0	0	0	0	0	0	0	1	0	0	0	0	0	0	0	0	0	0	0	0	0
OTU_51	Archaea	Euryarchaeota	Thermoplasmata	Thermoplasmatales	Marine Group II	uncultured marine group II euryarchaeote	uncultured marine group II euryarchaeote	0	0	0	0	0	7	0	0	0	0	0	0	0	2	16	44	45	0	0	1	0	0
OTU_510	Unclassified	Unclassified	Unclassified	Unclassified	Unclassified	Unclassified	Unclassified	0	0	0	0	0	0	0	0	0	1	0	0	0	0	0	0	0	0	0	0	0	0
OTU_511	Archaea	Euryarchaeota	Methanomicrobia	Methanosarcinales	Methanosaetaceae	Methanosaeta	uncultured methanogenic archaeon	0	0	0	0	0	0	0	0	0	0	0	0	0	0	0	0	0	1	0	0	0	0
OTU_512	Archaea	Unclassified	Unclassified	Unclassified	Unclassified	Unclassified	Unclassified	0	0	0	0	0	0	0	0	0	0	0	0	0	0	0	0	0	0	0	0	0	3
OTU_513	Archaea	Thaumarchaeota	Marine Group I	Unknown Order	Unknown Family	Candidatus Nitrosopelagicus	Unclassified	0	2	0	0	0	0	0	0	1	2	0	0	2	0	0	0	0	0	4	0	0	0
OTU_514	Archaea	Thaumarchaeota	Marine Group I	uncultured marine group I thaumarchaeote	uncultured marine group I thaumarchaeote	uncultured marine group I thaumarchaeote	uncultured marine group I thaumarchaeote	0	0	1	0	1	0	0	1	0	0	0	0	1	0	0	0	0	0	1	0	0	0
OTU_515	Archaea	Euryarchaeota	Methanomicrobia	Methanosarcinales	Methanosarcinaceae	Methanosarcina	uncultured methanogenic archaeon	0	0	0	0	0	0	0	0	0	0	0	0	0	0	0	0	0	0	4	0	0	13
OTU_516	Archaea	Euryarchaeota	Thermoplasmata	Thermoplasmatales	Marine Group III	uncultured marine group III euryarchaeote HF10_21C05	uncultured marine group III euryarchaeote HF10_21C05	1	0	0	0	0	0	1	0	0	0	0	0	0	0	0	0	0	0	0	0	0	0
OTU_517	Archaea	Euryarchaeota	Thermoplasmata	Thermoplasmatales	Marine Group II	uncultured marine group II euryarchaeote	uncultured marine group II euryarchaeote	0	0	0	0	1	5	0	0	0	0	0	0	0	0	0	0	1	0	0	0	0	0
OTU_518	Archaea	Euryarchaeota	Thermoplasmata	Thermoplasmatales	Marine Group II	Unclassified	Unclassified	0	0	0	0	0	0	0	2	0	0	0	0	0	0	0	0	0	0	0	0	0	0
OTU_519	Archaea	Euryarchaeota	Thermoplasmata	Thermoplasmatales	Marine Group II	Unclassified	Unclassified	0	14	0	0	0	0	0	0	0	0	0	0	19	0	0	0	0	1	1	0	0	0
OTU_52	Archaea	Euryarchaeota	Thermoplasmata	Thermoplasmatales	Marine Group III	uncultured marine archaeon	uncultured marine archaeon	1	0	26	45	154	157	0	101	0	0	0	1	0	102	80	147	317	0	2	62	0	0
OTU_520	Archaea	Euryarchaeota	Thermoplasmata	Thermoplasmatales	Marine Group III	uncultured marine archaeon	uncultured marine archaeon	0	0	0	0	0	0	0	3	0	0	0	0	0	0	0	0	0	0	0	0	0	0
OTU_521	Archaea	Euryarchaeota	Thermoplasmata	Thermoplasmatales	Marine Group II	uncultured marine group II euryarchaeote HF70_91G08	uncultured marine group II euryarchaeote HF70_91G08	0	0	0	0	0	0	2	0	0	0	0	0	0	0	0	0	0	0	0	0	0	0
OTU_522	Archaea	Euryarchaeota	Thermoplasmata	Thermoplasmatales	Marine Group II	uncultured marine group II euryarchaeote	uncultured marine group II euryarchaeote	0	0	0	0	0	0	0	8	0	0	0	0	0	0	0	0	0	0	0	0	0	0
OTU_523	Archaea	Euryarchaeota	Thermoplasmata	Thermoplasmatales	Marine Group II	uncultured marine group II euryarchaeote HF200_66A10	uncultured marine group II euryarchaeote HF200_66A10	0	0	38	1	0	0	0	0	0	0	5	0	0	88	4	13	26	0	1	13	4	0
OTU_524	Archaea	Thaumarchaeota	Marine Group I	uncultured marine archaeon	uncultured marine archaeon	uncultured marine archaeon	uncultured marine archaeon	0	0	0	0	0	0	0	0	0	0	0	0	1	0	0	0	0	0	0	0	0	0
OTU_525	Archaea	Thaumarchaeota	Marine Group I	Unclassified	Unclassified	Unclassified	Unclassified	0	0	0	0	0	0	0	0	0	0	0	0	0	8	20	4	3	0	0	0	0	0
OTU_526	Archaea	Thaumarchaeota	Marine Group I	Unknown Order	Unknown Family	Candidatus Nitrosopelagicus	marine metagenome	0	0	0	0	0	0	0	0	0	0	0	1	0	0	0	0	0	0	0	0	0	0
OTU_527	Archaea	Euryarchaeota	Thermoplasmata	Thermoplasmatales	Marine Group II	uncultured marine group II euryarchaeote HF130_27A09	uncultured marine group II euryarchaeote HF130_27A09	0	2	0	0	0	0	0	0	0	0	0	0	0	0	0	0	0	0	0	0	0	0
OTU_528	Archaea	Euryarchaeota	Thermoplasmata	Thermoplasmatales	Marine Group II	Unclassified	Unclassified	0	0	0	0	0	0	0	0	0	0	1	0	0	0	0	0	0	0	0	0	0	0
OTU_529	Archaea	Euryarchaeota	Thermoplasmata	Thermoplasmatales	Marine Group II	uncultured marine group II euryarchaeote HF130_27A09	uncultured marine group II euryarchaeote HF130_27A09	0	0	0	0	0	0	0	0	0	0	0	2	0	0	0	0	0	0	0	0	0	0
OTU_53	Archaea	Euryarchaeota	Thermoplasmata	Thermoplasmatales	Marine Group II	uncultured marine group II euryarchaeote HF70_48A05	uncultured marine group II euryarchaeote HF70_48A05	8	0	0	0	0	1	3	7	0	0	0	11	0	0	0	0	0	0	0	0	0	0
OTU_530	Archaea	Euryarchaeota	Thermoplasmata	Thermoplasmatales	Marine Group II	Unclassified	Unclassified	7	0	0	0	0	0	2	1	0	0	0	8	0	0	0	0	1	1	0	0	0	0
OTU_531	Archaea	Thaumarchaeota	Marine Group I	uncultured marine archaeon	uncultured marine archaeon	uncultured marine archaeon	uncultured marine archaeon	0	0	1	0	0	0	0	0	1	0	0	0	4	0	0	1	0	0	1	0	0	0
OTU_532	Archaea	Euryarchaeota	Thermoplasmata	Thermoplasmatales	Marine Group II	uncultured marine microorganism HF200_10-06-02	uncultured marine microorganism HF200_10-06-02	0	2	0	0	0	0	0	0	0	0	0	0	5	0	0	0	0	0	0	0	0	0
OTU_533	Archaea	Thaumarchaeota	Unclassified	Unclassified	Unclassified	Unclassified	Unclassified	0	0	0	0	0	0	0	0	0	0	0	0	0	0	0	0	0	0	0	0	1	0
OTU_534	Archaea	Thaumarchaeota	Marine Group I	Unclassified	Unclassified	Unclassified	Unclassified	0	0	0	0	0	0	0	0	0	0	0	0	0	0	0	0	0	0	0	0	1	0
OTU_535	Archaea	Euryarchaeota	Thermoplasmata	Thermoplasmatales	Marine Group II	uncultured marine group II euryarchaeote HF500_30A08	uncultured marine group II euryarchaeote HF500_30A08	0	0	0	0	0	0	0	0	0	0	0	0	0	0	0	0	0	0	0	1	0	0
OTU_536	Archaea	Thaumarchaeota	Marine Group I	uncultured marine archaeon	uncultured marine archaeon	uncultured marine archaeon	uncultured marine archaeon	1	6	2	3	2	0	0	2	1	4	1	0	2	1	0	0	0	0	2	0	1	0
OTU_537	Archaea	Thaumarchaeota	Marine Group I	Unclassified	Unclassified	Unclassified	Unclassified	0	0	1	0	0	0	0	0	0	0	0	0	0	0	0	0	0	0	0	0	0	0
OTU_538	Archaea	Euryarchaeota	Methanomicrobia	Methanosarcinales	Methanosaetaceae	Methanosaeta	uncultured methanogenic archaeon	0	0	0	0	0	0	0	0	0	0	0	0	0	0	0	0	0	1	0	0	0	0
OTU_539	Archaea	Thaumarchaeota	Marine Group I	Unclassified	Unclassified	Unclassified	Unclassified	0	0	1	5	1	5	0	0	0	0	3	0	0	0	0	0	0	0	0	0	0	4
OTU_54	Archaea	Euryarchaeota	Thermoplasmata	Thermoplasmatales	Marine Group II	uncultured marine archaeon	uncultured marine archaeon	0	0	0	0	3	154	0	0	0	0	0	0	0	0	0	2	11	0	0	0	0	0
OTU_540	Archaea	Thaumarchaeota	Marine Group I	uncultured marine group I thaumarchaeote	uncultured marine group I thaumarchaeote	uncultured marine group I thaumarchaeote	uncultured marine group I thaumarchaeote	0	1	0	0	0	0	0	0	0	0	0	0	0	0	0	0	0	0	0	0	0	0
OTU_541	Archaea	Euryarchaeota	Thermoplasmata	Thermoplasmatales	Marine Group II	uncultured marine group II euryarchaeote HF200_66A10	uncultured marine group II euryarchaeote HF200_66A10	0	0	0	0	0	0	0	0	0	0	0	0	1	0	0	0	0	0	0	0	0	0
OTU_542	Archaea	Thaumarchaeota	Marine Group I	uncultured thaumarchaeote	uncultured thaumarchaeote	uncultured thaumarchaeote	uncultured thaumarchaeote	0	0	0	0	0	0	0	0	0	0	0	0	0	2	15	0	0	0	0	0	0	0
OTU_543	Archaea	Thaumarchaeota	F9P122000-Arc-2-E02	uncultured marine archaeon	uncultured marine archaeon	uncultured marine archaeon	uncultured marine archaeon	0	0	0	0	0	0	0	0	0	0	0	0	0	1	0	0	0	0	0	0	0	0
OTU_544	Archaea	Thaumarchaeota	Marine Group I	Unclassified	Unclassified	Unclassified	Unclassified	0	0	1	1	4	0	0	0	0	0	0	0	0	1	0	1	0	0	0	0	0	0
OTU_545	Archaea	Euryarchaeota	Thermoplasmata	Thermoplasmatales	Marine Group II	uncultured marine group II euryarchaeote	uncultured marine group II euryarchaeote	0	0	1	2	0	1	0	0	0	0	0	0	0	7	5	1	4	0	0	0	0	0
OTU_546	Archaea	Woesearchaeota (DHVEG-6)	Euryarchaeota archaeon SCGC AAA286-E23	Euryarchaeota archaeon SCGC AAA286-E23	Euryarchaeota archaeon SCGC AAA286-E23	Euryarchaeota archaeon SCGC AAA286-E23	Euryarchaeota archaeon SCGC AAA286-E23	0	0	0	0	0	0	0	0	0	0	0	0	0	0	1	0	0	0	0	0	0	0
OTU_547	Archaea	Euryarchaeota	Thermoplasmata	Thermoplasmatales	Marine Group III	uncultured marine archaeon	uncultured marine archaeon	0	0	0	0	0	0	0	1	0	0	0	0	0	1	0	0	0	0	0	0	0	0
OTU_548	Archaea	Thaumarchaeota	Marine Benthic Group A	uncultured marine archaeon	uncultured marine archaeon	uncultured marine archaeon	uncultured marine archaeon	0	0	0	0	1	0	0	0	0	0	0	0	0	0	0	0	0	0	0	0	0	0
OTU_549	Archaea	Euryarchaeota	Thermoplasmata	Thermoplasmatales	Marine Group II	uncultured marine group II euryarchaeote HF500_30A08	uncultured marine group II euryarchaeote HF500_30A08	0	0	0	1	0	0	0	0	0	0	0	0	0	0	0	0	0	0	0	1	2	0
OTU_55	Archaea	Thaumarchaeota	Marine Group I	Unknown Order	Unknown Family	Candidatus Nitrosopumilus	uncultured marine archaeon	0	0	0	0	13	47	0	8	0	0	0	0	1	0	0	4	8	0	0	2	0	9
OTU_550	Archaea	Euryarchaeota	Thermoplasmata	Thermoplasmatales	Marine Group III	uncultured marine archaeon	uncultured marine archaeon	0	0	0	0	0	0	0	0	0	0	0	0	0	0	0	0	0	0	0	1	0	0
OTU_551	Archaea	Euryarchaeota	Thermoplasmata	Thermoplasmatales	Marine Group III	uncultured marine group III euryarchaeote HF10_21C05	uncultured marine group III euryarchaeote HF10_21C05	0	0	0	0	0	0	0	0	0	0	0	0	0	0	0	0	0	0	0	3	0	0
OTU_552	Archaea	Euryarchaeota	Thermoplasmata	Thermoplasmatales	Marine Group III	uncultured marine archaeon	uncultured marine archaeon	1	5	0	0	0	0	0	4	0	0	0	0	2	0	0	0	0	0	0	0	0	0
OTU_553	Archaea	Euryarchaeota	Thermoplasmata	Thermoplasmatales	Marine Group II	uncultured marine microorganism HF200_10-06-02	uncultured marine microorganism HF200_10-06-02	0	1	0	0	0	0	0	0	0	0	0	0	0	0	0	0	0	0	0	0	0	0
OTU_554	Archaea	Thaumarchaeota	Marine Group I	uncultured thaumarchaeote	uncultured thaumarchaeote	uncultured thaumarchaeote	uncultured thaumarchaeote	0	1	0	0	0	0	0	0	1	0	0	0	0	0	0	0	0	0	2	0	0	0
OTU_555	Archaea	Euryarchaeota	Thermoplasmata	Thermoplasmatales	Marine Group II	uncultured marine microorganism HF200_10-06-02	uncultured marine microorganism HF200_10-06-02	1	1	0	0	0	0	0	0	0	0	0	0	2	0	0	0	0	0	0	0	0	0
OTU_556	Archaea	Euryarchaeota	Thermoplasmata	Thermoplasmatales	Marine Group II	uncultured marine group II euryarchaeote	uncultured marine group II euryarchaeote	0	0	0	1	0	1	0	0	0	0	0	0	0	0	0	0	2	0	0	0	0	0
OTU_557	Archaea	Thaumarchaeota	Marine Group I	Unknown Order	Unknown Family	Candidatus Nitrosopelagicus	Unclassified	0	0	0	0	0	0	0	0	0	0	0	0	0	0	0	0	0	0	1	0	0	0
OTU_558	Archaea	Thaumarchaeota	Marine Group I	Unknown Order	Unknown Family	Candidatus Nitrosopelagicus	uncultured archaeon	0	0	0	0	0	0	0	0	2	1	0	0	1	0	0	0	0	0	6	0	0	0
OTU_559	Archaea	Thaumarchaeota	Marine Group I	uncultured thaumarchaeote	uncultured thaumarchaeote	uncultured thaumarchaeote	uncultured thaumarchaeote	0	3	8	8	1	3	0	8	0	1	0	0	10	3	0	0	0	0	1	0	0	0
OTU_56	Archaea	Euryarchaeota	Thermoplasmata	Thermoplasmatales	Marine Group III	uncultured marine group III euryarchaeote	uncultured marine group III euryarchaeote	0	1	0	4	10	15	0	0	0	0	0	0	2	0	0	5	3	0	0	0	0	0
OTU_560	Bacteria	Unclassified	Unclassified	Unclassified	Unclassified	Unclassified	Unclassified	0	0	0	0	0	0	1	0	0	0	0	0	0	0	0	0	0	0	0	0	0	0
OTU_561	Unclassified	Unclassified	Unclassified	Unclassified	Unclassified	Unclassified	Unclassified	0	0	0	0	0	0	1	0	0	0	0	0	0	0	0	0	0	0	0	0	0	0
OTU_562	Unclassified	Unclassified	Unclassified	Unclassified	Unclassified	Unclassified	Unclassified	0	0	0	0	0	0	0	0	0	1	0	0	0	0	0	0	0	0	0	0	0	0
OTU_563	Archaea	Thaumarchaeota	Marine Group I	Unclassified	Unclassified	Unclassified	Unclassified	0	0	0	0	0	0	0	0	0	1	0	0	0	0	0	0	0	0	0	0	0	0
OTU_564	Archaea	Thaumarchaeota	Marine Group I	uncultured marine archaeon	uncultured marine archaeon	uncultured marine archaeon	uncultured marine archaeon	0	0	0	0	0	0	0	0	12	3	0	0	0	0	0	0	0	0	2	0	0	0
OTU_565	Archaea	Thaumarchaeota	Marine Group I	Unknown Order	Unknown Family	Candidatus Nitrosopelagicus	Unclassified	0	0	0	0	0	0	0	0	1	0	0	0	0	0	0	0	0	0	0	0	0	0
OTU_566	Archaea	Thaumarchaeota	Marine Group I	Unclassified	Unclassified	Unclassified	Unclassified	0	0	0	0	0	0	0	0	1	0	0	0	0	0	0	0	0	0	0	0	0	0
OTU_567	Archaea	Thaumarchaeota	Marine Group I	uncultured marine archaeon	uncultured marine archaeon	uncultured marine archaeon	uncultured marine archaeon	0	0	0	1	0	0	0	0	0	0	1	0	0	0	0	0	0	0	0	0	0	0
OTU_568	Archaea	Euryarchaeota	Thermoplasmata	Thermoplasmatales	Marine Group II	uncultured marine group II euryarchaeote HF10_20F02	uncultured marine group II euryarchaeote HF10_20F02	0	0	0	0	0	0	0	0	0	0	0	0	0	0	0	0	0	2	0	0	0	0
OTU_569	Archaea	Euryarchaeota	Thermoplasmata	Thermoplasmatales	Marine Group II	uncultured marine group II euryarchaeote HF200_66A10	uncultured marine group II euryarchaeote HF200_66A10	58	167	0	0	3	1	2	14	0	0	0	208	298	9	0	0	0	2	0	0	0	0
OTU_57	Unclassified	Unclassified	Unclassified	Unclassified	Unclassified	Unclassified	Unclassified	0	0	0	0	0	0	0	0	0	0	0	0	0	0	0	0	0	40	0	0	0	0
OTU_570	Archaea	Thaumarchaeota	Marine Group I	uncultured marine archaeon	uncultured marine archaeon	uncultured marine archaeon	uncultured marine archaeon	0	1	5	22	12	7	0	7	0	5	0	0	3	2	0	8	7	0	2	2	8	5
OTU_571	Archaea	Thaumarchaeota	Unclassified	Unclassified	Unclassified	Unclassified	Unclassified	0	1	0	0	0	0	0	0	0	0	0	0	0	0	0	0	0	0	0	0	0	0
OTU_572	Archaea	Euryarchaeota	Thermoplasmata	Thermoplasmatales	Marine Group III	uncultured marine archaeon	uncultured marine archaeon	0	0	0	0	0	0	0	1	0	0	0	0	0	1	0	0	0	0	0	0	0	0
OTU_573	Archaea	Unclassified	Unclassified	Unclassified	Unclassified	Unclassified	Unclassified	0	0	0	0	0	0	0	0	0	0	0	0	0	0	0	0	0	0	0	0	0	1
OTU_574	Archaea	Thaumarchaeota	Marine Group I	Unclassified	Unclassified	Unclassified	Unclassified	0	0	0	0	0	0	0	0	0	0	0	0	0	0	0	0	0	0	0	0	0	1
OTU_575	Archaea	Euryarchaeota	Thermoplasmata	Thermoplasmatales	Marine Group II	uncultured marine group II euryarchaeote	uncultured marine group II euryarchaeote	0	1	4	0	2	0	0	74	0	0	0	0	2	0	0	0	0	0	0	1	0	0
OTU_576	Archaea	Thaumarchaeota	Marine Group I	Unclassified	Unclassified	Unclassified	Unclassified	0	0	0	0	0	0	0	0	0	1	0	0	0	0	0	0	0	0	0	0	0	0
OTU_577	Archaea	Euryarchaeota	Thermoplasmata	Thermoplasmatales	Marine Group II	Unclassified	Unclassified	0	1	18	1	1	1	0	1	0	2	2	0	1	0	0	0	0	0	0	3	3	0
OTU_578	Archaea	Thaumarchaeota	Marine Group I	uncultured thaumarchaeote	uncultured thaumarchaeote	uncultured thaumarchaeote	uncultured thaumarchaeote	0	2	0	0	0	0	0	0	1	1	0	0	1	0	0	0	0	0	0	0	0	0
OTU_579	Archaea	Euryarchaeota	Thermoplasmata	Thermoplasmatales	Marine Group II	uncultured marine group II euryarchaeote	uncultured marine group II euryarchaeote	0	0	0	0	0	2	0	0	0	0	0	0	0	0	0	0	0	0	0	0	0	0
OTU_58	Archaea	Euryarchaeota	Methanobacteria	Methanobacteriales	Methanobacteriaceae	Methanobrevibacter	uncultured archaeon	0	0	0	2	0	0	0	0	0	12	0	0	0	0	0	0	0	0	68	42	0	0
OTU_580	Archaea	Euryarchaeota	Thermoplasmata	Thermoplasmatales	Marine Group III	uncultured marine archaeon	uncultured marine archaeon	0	5	1	0	0	0	0	24	0	0	0	0	4	1	0	0	0	0	0	0	0	0
OTU_581	Archaea	Euryarchaeota	Thermoplasmata	Thermoplasmatales	Marine Group II	uncultured marine group II euryarchaeote HF200_66A10	uncultured marine group II euryarchaeote HF200_66A10	0	0	0	0	0	0	0	0	0	0	0	0	0	1	0	0	0	0	0	0	0	0
OTU_582	Archaea	Thaumarchaeota	Marine Group I	uncultured marine thaumarchaeote KM3_90_C11	uncultured marine thaumarchaeote KM3_90_C11	uncultured marine thaumarchaeote KM3_90_C11	uncultured marine thaumarchaeote KM3_90_C11	0	1	0	1	0	0	0	0	0	0	0	0	0	20	1	0	0	0	0	0	0	0
OTU_583	Archaea	Euryarchaeota	Thermoplasmata	Thermoplasmatales	Marine Group II	uncultured marine group II euryarchaeote HF500_30A08	uncultured marine group II euryarchaeote HF500_30A08	0	0	0	0	0	0	0	0	0	0	0	0	0	1	0	0	0	0	0	0	0	0
OTU_584	Archaea	Thaumarchaeota	Marine Benthic Group A	uncultured crenarchaeote	uncultured crenarchaeote	uncultured crenarchaeote	uncultured crenarchaeote	0	0	0	0	0	0	0	0	0	0	0	0	0	0	0	1	0	0	0	0	0	0
OTU_585	Archaea	Woesearchaeota (DHVEG-6)	uncultured euryarchaeote	uncultured euryarchaeote	uncultured euryarchaeote	uncultured euryarchaeote	uncultured euryarchaeote	0	0	0	0	0	0	0	0	0	0	0	0	0	0	0	0	3	0	0	0	0	0
OTU_586	Archaea	Thaumarchaeota	Marine Group I	Unclassified	Unclassified	Unclassified	Unclassified	0	0	0	2	3	1	0	0	0	0	0	0	0	0	0	0	1	0	0	0	0	0
OTU_587	Archaea	Euryarchaeota	Thermoplasmata	Thermoplasmatales	Marine Group II	uncultured marine group II euryarchaeote HF10_20F02	uncultured marine group II euryarchaeote HF10_20F02	0	0	0	0	0	0	1	0	0	0	0	0	0	0	0	0	0	0	0	0	0	0
OTU_588	Archaea	Euryarchaeota	Thermoplasmata	Thermoplasmatales	Marine Group II	uncultured marine group II euryarchaeote HF70_91G08	uncultured marine group II euryarchaeote HF70_91G08	1	0	0	0	5	2	0	0	0	1	5	13	1	1	0	0	1	0	0	0	2	0
OTU_589	Archaea	Woesearchaeota (DHVEG-6)	uncultured euryarchaeote	uncultured euryarchaeote	uncultured euryarchaeote	uncultured euryarchaeote	uncultured euryarchaeote	0	1	0	0	0	0	0	0	0	0	0	0	2	0	0	0	0	0	0	0	0	0
OTU_59	Archaea	Woesearchaeota (DHVEG-6)	uncultured archaeon	uncultured archaeon	uncultured archaeon	uncultured archaeon	uncultured archaeon	0	0	0	12	18	12	0	0	0	0	0	0	0	0	1	13	15	0	0	0	102	0
OTU_590	Bacteria	Bacteroidetes	Flavobacteriia	Flavobacteriales	Cryomorphaceae	Owenweeksia	uncultured bacterium	0	0	0	0	0	0	0	0	0	0	0	0	0	0	0	0	0	0	0	0	0	2
OTU_591	Archaea	Euryarchaeota	Thermoplasmata	Thermoplasmatales	Marine Group II	uncultured marine group II euryarchaeote HF500_30A08	uncultured marine group II euryarchaeote HF500_30A08	0	0	0	0	0	1	0	0	0	0	0	0	0	34	0	0	1	0	0	0	0	0
OTU_592	Archaea	Euryarchaeota	Thermoplasmata	Thermoplasmatales	Marine Group III	uncultured marine archaeon	uncultured marine archaeon	0	0	0	2	4	7	0	3	0	0	0	0	0	22	20	19	34	0	0	6	0	0
OTU_593	Archaea	Euryarchaeota	Halobacteria	Halobacteriales	Halobacteriaceae	Halalkalicoccus	Halalkalicoccus jeotgali	0	0	0	0	0	0	0	0	0	0	0	0	0	0	0	0	1	0	0	0	0	0
OTU_594	Archaea	Thaumarchaeota	Marine Group I	Unclassified	Unclassified	Unclassified	Unclassified	0	0	1	0	0	0	0	0	0	0	0	0	0	0	0	0	0	0	0	0	0	0
OTU_595	Unclassified	Unclassified	Unclassified	Unclassified	Unclassified	Unclassified	Unclassified	0	0	0	0	0	0	0	1	0	0	0	0	0	0	0	0	0	0	0	0	0	0
OTU_596	Archaea	Euryarchaeota	Thermoplasmata	Thermoplasmatales	Marine Group III	uncultured marine archaeon	uncultured marine archaeon	0	0	0	0	0	0	0	1	0	0	0	0	0	8	0	0	0	0	0	0	0	0
OTU_597	Archaea	Euryarchaeota	Thermoplasmata	Thermoplasmatales	Marine Group II	Unclassified	Unclassified	0	1	0	0	0	0	0	0	0	0	0	0	2	0	0	0	0	0	0	0	0	0
OTU_598	Archaea	Euryarchaeota	Thermoplasmata	Thermoplasmatales	Marine Group II	uncultured marine group II euryarchaeote HF130_27A09	uncultured marine group II euryarchaeote HF130_27A09	2	5	0	0	0	0	0	2	0	0	0	0	16	0	0	0	0	0	0	7	0	0
OTU_599	Archaea	Euryarchaeota	Thermoplasmata	Thermoplasmatales	Marine Group II	uncultured marine group II euryarchaeote HF10_36B02	uncultured marine group II euryarchaeote HF10_36B02	0	0	0	0	0	0	1	0	0	0	0	0	0	0	0	0	0	0	0	0	0	0
OTU_6	Archaea	Woesearchaeota (DHVEG-6)	uncultured euryarchaeote	uncultured euryarchaeote	uncultured euryarchaeote	uncultured euryarchaeote	uncultured euryarchaeote	60	0	0	0	0	0	20	0	0	0	14	1	0	0	0	0	0	1325	0	0	0	0
OTU_60	Archaea	Euryarchaeota	Thermoplasmata	Thermoplasmatales	Marine Group III	uncultured marine archaeon	uncultured marine archaeon	2	26	12	17	5	3	0	20	0	0	0	0	11	17	2	0	1	0	0	69	0	0
OTU_600	Archaea	Euryarchaeota	Methanomicrobia	Methanosarcinales	Methanosarcinaceae	Methanosarcina	uncultured Methanosarcina sp.	0	0	0	0	0	0	0	0	0	0	0	0	0	0	0	0	0	2	0	0	0	0
OTU_601	Archaea	Euryarchaeota	Methanomicrobia	Methanosarcinales	Methanosaetaceae	Methanosaeta	uncultured methanogenic archaeon	0	0	0	0	0	0	0	0	0	0	0	0	0	0	0	0	0	1	0	0	0	0
OTU_602	Archaea	Thaumarchaeota	Marine Group I	Unclassified	Unclassified	Unclassified	Unclassified	0	0	0	0	0	0	0	0	0	0	0	0	0	0	0	0	0	0	1	0	0	0
OTU_603	Archaea	Euryarchaeota	Thermoplasmata	Thermoplasmatales	Marine Group II	Unclassified	Unclassified	0	0	0	0	0	0	0	0	0	0	0	0	1	0	0	0	0	0	0	0	0	0
OTU_604	Archaea	Euryarchaeota	Thermoplasmata	Thermoplasmatales	Marine Group III	uncultured marine archaeon	uncultured marine archaeon	0	0	2	0	0	0	0	4	0	0	0	0	1	1	0	0	0	0	0	1	0	0
OTU_605	Archaea	Unclassified	Unclassified	Unclassified	Unclassified	Unclassified	Unclassified	0	0	0	0	0	0	0	0	0	0	0	0	0	0	0	0	0	2	0	0	0	0
OTU_606	Archaea	Woesearchaeota (DHVEG-6)	uncultured archaeon	uncultured archaeon	uncultured archaeon	uncultured archaeon	uncultured archaeon	0	0	0	0	0	0	0	0	0	0	0	0	0	0	3	0	0	0	0	0	0	0
OTU_607	Archaea	Thaumarchaeota	Marine Group I	Unclassified	Unclassified	Unclassified	Unclassified	0	0	0	0	0	1	0	0	0	0	0	0	0	0	0	0	0	0	1	0	0	0
OTU_608	Archaea	Euryarchaeota	Thermoplasmata	Thermoplasmatales	Marine Group II	uncultured marine group II euryarchaeote HF130_27A09	uncultured marine group II euryarchaeote HF130_27A09	0	0	0	0	0	2	0	0	0	0	0	0	0	0	0	0	0	0	0	0	0	0
OTU_609	Archaea	Thaumarchaeota	Marine Group I	Unclassified	Unclassified	Unclassified	Unclassified	0	0	0	0	0	0	0	0	1	0	0	0	0	0	0	0	0	0	0	0	0	0
OTU_61	Archaea	Woesearchaeota (DHVEG-6)	uncultured archaeon	uncultured archaeon	uncultured archaeon	uncultured archaeon	uncultured archaeon	0	0	0	0	0	0	0	0	0	0	0	0	0	0	0	0	0	137	0	0	0	0
OTU_610	Archaea	Thaumarchaeota	Marine Group I	uncultured marine thaumarchaeote KM3_90_C11	uncultured marine thaumarchaeote KM3_90_C11	uncultured marine thaumarchaeote KM3_90_C11	uncultured marine thaumarchaeote KM3_90_C11	0	0	0	0	0	0	0	1	2	0	0	0	0	1	0	0	0	0	0	1	0	0
OTU_611	Archaea	Thaumarchaeota	Marine Group I	uncultured marine archaeon	uncultured marine archaeon	uncultured marine archaeon	uncultured marine archaeon	0	0	0	0	0	0	0	0	1	2	0	0	0	0	0	0	0	0	2	0	0	0
OTU_612	Unclassified	Unclassified	Unclassified	Unclassified	Unclassified	Unclassified	Unclassified	0	0	0	0	0	0	0	0	1	0	0	0	0	0	0	0	0	0	0	0	0	0
OTU_613	Archaea	Thaumarchaeota	Marine Group I	Unclassified	Unclassified	Unclassified	Unclassified	0	0	0	0	0	0	0	0	1	0	0	0	0	0	0	0	0	0	1	0	0	0
OTU_614	Archaea	Thaumarchaeota	Marine Group I	Unclassified	Unclassified	Unclassified	Unclassified	0	0	0	0	0	0	0	0	0	0	0	0	0	0	0	0	0	0	0	0	1	0
OTU_615	Archaea	Thaumarchaeota	Marine Group I	Unclassified	Unclassified	Unclassified	Unclassified	0	0	0	0	1	0	0	0	0	0	0	0	0	0	0	0	0	0	0	0	0	0
OTU_616	Archaea	Euryarchaeota	Thermoplasmata	Thermoplasmatales	Marine Group II	uncultured marine group II euryarchaeote HF130_40G09	uncultured marine group II euryarchaeote HF130_40G09	0	4	0	0	0	0	0	0	0	0	0	1	1	0	0	0	0	0	0	0	0	0
OTU_617	Archaea	Thaumarchaeota	Marine Group I	uncultured marine archaeon	uncultured marine archaeon	uncultured marine archaeon	uncultured marine archaeon	0	0	0	1	0	0	0	0	0	0	0	0	0	0	0	0	0	0	0	0	0	0
OTU_618	Archaea	Euryarchaeota	Thermoplasmata	Thermoplasmatales	Marine Group III	uncultured marine archaeon	uncultured marine archaeon	0	0	1	0	0	0	0	0	0	0	0	0	0	0	0	0	0	0	0	0	0	0
OTU_619	Archaea	Thaumarchaeota	Marine Group I	Unclassified	Unclassified	Unclassified	Unclassified	0	0	1	0	0	0	0	0	0	0	0	0	0	0	0	0	0	0	0	0	0	0
OTU_62	Archaea	Euryarchaeota	Halobacteria	Halobacteriales	Halobacteriaceae	Candidatus Halobonum	uncultured archaeon	0	6	5	0	1	0	0	0	0	0	0	0	6	11	0	0	0	0	58	158	0	0
OTU_620	Bacteria	Unclassified	Unclassified	Unclassified	Unclassified	Unclassified	Unclassified	0	0	0	0	3	1	0	0	0	0	0	0	0	0	0	0	0	0	0	0	0	0
OTU_621	Archaea	Euryarchaeota	Thermoplasmata	Thermoplasmatales	Marine Group II	uncultured marine group II euryarchaeote	uncultured marine group II euryarchaeote	0	0	0	0	0	0	0	1	0	0	0	0	0	0	0	0	0	0	0	0	0	0
OTU_622	Archaea	Thaumarchaeota	Marine Group I	Unclassified	Unclassified	Unclassified	Unclassified	0	0	0	0	0	0	0	0	0	0	0	0	0	0	0	0	1	0	0	0	0	0
OTU_623	Archaea	Euryarchaeota	Thermoplasmata	Thermoplasmatales	Marine Group II	uncultured marine microorganism HF200_10-06-02	uncultured marine microorganism HF200_10-06-02	0	0	0	0	0	0	0	0	0	0	0	0	1	0	0	0	3	0	0	0	0	0
OTU_624	Archaea	Euryarchaeota	Thermoplasmata	Thermoplasmatales	Marine Group II	uncultured archeon 'KTK 31A'	uncultured archeon 'KTK 31A'	0	0	0	0	0	0	0	1	0	0	0	0	0	0	0	0	0	0	0	0	0	0
OTU_625	Archaea	Euryarchaeota	Thermoplasmata	Thermoplasmatales	Marine Group II	uncultured archaeon	uncultured archaeon	2	0	0	0	0	0	0	0	0	0	0	0	0	0	0	0	0	0	0	0	0	0
OTU_626	Archaea	Marine Hydrothermal Vent Group(MHVG)	uncultured marine euryarchaeote	uncultured marine euryarchaeote	uncultured marine euryarchaeote	uncultured marine euryarchaeote	uncultured marine euryarchaeote	0	0	0	0	0	0	0	0	0	0	0	0	0	0	0	1	0	0	0	0	0	0
OTU_627	Archaea	Thaumarchaeota	Marine Group I	Unclassified	Unclassified	Unclassified	Unclassified	0	0	0	0	0	0	0	0	1	0	0	0	0	0	0	0	0	0	0	0	0	0
OTU_628	Archaea	Euryarchaeota	Halobacteria	Halobacteriales	Halobacteriaceae	Natronococcus	Unclassified	0	0	0	0	0	0	0	0	0	0	0	0	0	0	0	0	0	0	0	2	0	0
OTU_629	Archaea	Euryarchaeota	Thermoplasmata	Thermoplasmatales	Marine Group II	uncultured marine group II euryarchaeote HF500_30A08	uncultured marine group II euryarchaeote HF500_30A08	0	0	1	0	0	0	0	0	0	1	1	0	0	0	0	0	0	0	0	3	6	0
OTU_63	Archaea	Euryarchaeota	Thermoplasmata	Thermoplasmatales	Marine Group II	Unclassified	Unclassified	76	0	1	0	0	1	13	20	0	0	0	39	10	0	0	0	0	0	0	0	0	0
OTU_630	Archaea	Euryarchaeota	Thermoplasmata	Thermoplasmatales	Marine Group III	uncultured marine group III euryarchaeote HF10_21C05	uncultured marine group III euryarchaeote HF10_21C05	1	0	0	0	0	0	0	0	0	0	0	0	0	0	0	0	0	0	0	0	0	0
OTU_631	Archaea	Euryarchaeota	Thermoplasmata	Thermoplasmatales	Marine Group II	uncultured marine group II euryarchaeote HF70_91G08	uncultured marine group II euryarchaeote HF70_91G08	8	1	1	0	0	1	22	0	0	0	0	8	4	0	0	0	0	0	0	0	1	0
OTU_632	Archaea	Euryarchaeota	Thermoplasmata	Thermoplasmatales	Marine Group II	Unclassified	Unclassified	0	1	0	0	0	0	0	0	0	0	0	0	0	0	0	0	0	0	0	0	0	0
OTU_633	Archaea	Euryarchaeota	Methanomicrobia	Methanosarcinales	Methanosaetaceae	Methanosaeta	uncultured methanogenic archaeon	0	0	0	0	0	0	0	0	0	0	0	0	0	0	0	0	0	4	0	0	0	0
OTU_634	Archaea	Euryarchaeota	Thermoplasmata	Thermoplasmatales	Marine Group III	uncultured marine archaeon	uncultured marine archaeon	0	0	4	0	0	1	0	11	0	0	0	1	0	52	51	19	17	0	0	6	0	0
OTU_635	Archaea	Euryarchaeota	Thermoplasmata	Thermoplasmatales	Marine Group II	uncultured marine group II euryarchaeote HF10_36B02	uncultured marine group II euryarchaeote HF10_36B02	0	0	0	0	0	0	0	1	0	0	0	0	0	0	0	0	0	0	0	0	0	0
OTU_636	Archaea	Euryarchaeota	Thermoplasmata	Thermoplasmatales	Marine Group II	uncultured marine archaeon	uncultured marine archaeon	0	0	0	0	0	0	0	5	0	0	0	0	0	0	0	0	0	0	0	0	0	0
OTU_637	Archaea	Thaumarchaeota	Marine Group I	Unknown Order	Unknown Family	Candidatus Nitrosopelagicus	Unclassified	0	0	0	0	0	0	0	0	1	0	0	0	0	0	0	0	0	0	0	0	0	0
OTU_638	Archaea	Thaumarchaeota	Marine Group I	Unknown Order	Unknown Family	Candidatus Nitrosopelagicus	Unclassified	0	0	0	0	0	0	0	0	0	0	0	0	0	0	0	0	0	0	1	0	0	0
OTU_639	Archaea	Thaumarchaeota	Marine Group I	Unknown Order	Unknown Family	Candidatus Nitrosopelagicus	uncultured archaeon	0	0	0	0	0	0	0	0	0	0	0	0	1	0	0	0	0	0	1	0	0	0
OTU_64	Unclassified	Unclassified	Unclassified	Unclassified	Unclassified	Unclassified	Unclassified	0	0	0	0	0	0	0	0	38	10	9	0	0	0	0	0	0	1	12	0	2	102
OTU_640	Archaea	Euryarchaeota	Methanomicrobia	Methanosarcinales	Methanosaetaceae	Methanosaeta	uncultured methanogenic archaeon	0	0	0	0	0	0	0	0	0	0	0	0	0	0	0	0	0	12	0	0	0	0
OTU_641	Archaea	Euryarchaeota	Thermoplasmata	Thermoplasmatales	Marine Group II	uncultured marine group II euryarchaeote HF200_66A10	uncultured marine group II euryarchaeote HF200_66A10	56	711	47	16	43	50	37	36	242	21	431	169	828	39	16	5	63	301	429	79	147	0
OTU_642	Archaea	Euryarchaeota	Thermoplasmata	Thermoplasmatales	Marine Group II	uncultured marine group II euryarchaeote	uncultured marine group II euryarchaeote	0	0	0	0	0	1	0	0	0	0	0	0	0	0	0	0	1	0	0	0	0	0
OTU_643	Archaea	Euryarchaeota	Thermoplasmata	Thermoplasmatales	Marine Group III	uncultured archaeon	uncultured archaeon	0	0	0	0	0	0	0	0	0	0	0	0	0	1	1	0	1	0	0	0	0	0
OTU_644	Archaea	Woesearchaeota (DHVEG-6)	uncultured euryarchaeote	uncultured euryarchaeote	uncultured euryarchaeote	uncultured euryarchaeote	uncultured euryarchaeote	0	0	0	1	0	1	0	0	0	0	0	0	0	0	0	0	1	0	5	0	0	0
OTU_645	Archaea	Thaumarchaeota	Marine Group I	uncultured marine archaeon	uncultured marine archaeon	uncultured marine archaeon	uncultured marine archaeon	0	0	0	0	0	0	0	0	0	0	0	0	0	11	19	5	2	0	0	0	0	0
OTU_646	Archaea	Thaumarchaeota	Marine Group I	Unclassified	Unclassified	Unclassified	Unclassified	0	0	0	0	0	0	0	0	0	0	0	0	0	0	0	0	0	0	0	0	0	1
OTU_647	Archaea	Euryarchaeota	Thermoplasmata	Thermoplasmatales	Marine Group II	uncultured marine group II euryarchaeote HF130_27A09	uncultured marine group II euryarchaeote HF130_27A09	2	0	0	0	0	0	1	0	0	0	0	0	0	0	0	0	0	0	0	0	0	0
OTU_648	Archaea	Thaumarchaeota	Marine Group I	Unclassified	Unclassified	Unclassified	Unclassified	0	0	0	1	0	0	0	0	0	0	0	0	0	0	0	0	0	0	0	0	0	0
OTU_649	Archaea	Euryarchaeota	Thermoplasmata	Thermoplasmatales	Marine Group II	uncultured marine group II euryarchaeote HF500_30A08	uncultured marine group II euryarchaeote HF500_30A08	0	5	29	41	44	40	0	12	0	7	231	1	3	18	0	11	9	0	0	15	209	0
OTU_65	Archaea	Thaumarchaeota	Marine Benthic Group A	uncultured marine group I thaumarchaeote	uncultured marine group I thaumarchaeote	uncultured marine group I thaumarchaeote	uncultured marine group I thaumarchaeote	0	1	3	1	0	2	0	0	13	5	67	0	0	14	48	29	28	0	1	0	15	53
OTU_650	Archaea	Euryarchaeota	Thermoplasmata	Thermoplasmatales	Marine Group III	uncultured marine archaeon	uncultured marine archaeon	0	0	0	0	5	5	0	4	0	0	0	0	0	0	0	3	3	0	0	0	0	0
OTU_651	Archaea	Thaumarchaeota	Marine Group I	uncultured marine group I thaumarchaeote	uncultured marine group I thaumarchaeote	uncultured marine group I thaumarchaeote	uncultured marine group I thaumarchaeote	0	0	0	0	0	0	0	0	0	0	0	0	0	0	0	0	0	0	0	0	0	1
OTU_652	Archaea	Thaumarchaeota	Marine Group I	Unknown Order	Unknown Family	Candidatus Nitrosopelagicus	marine metagenome	1	0	0	0	0	0	0	0	0	0	0	0	0	0	0	0	0	1	0	0	0	1
OTU_653	Archaea	Euryarchaeota	Thermoplasmata	Thermoplasmatales	Marine Group III	uncultured marine archaeon	uncultured marine archaeon	0	2	3	2	0	2	0	18	0	0	0	0	9	6	0	0	0	0	0	6	0	0
OTU_654	Archaea	Woesearchaeota (DHVEG-6)	Unclassified	Unclassified	Unclassified	Unclassified	Unclassified	0	0	0	1	0	0	0	0	0	0	0	0	0	0	0	0	0	0	0	0	0	0
OTU_655	Unclassified	Unclassified	Unclassified	Unclassified	Unclassified	Unclassified	Unclassified	0	0	0	0	0	0	0	10	0	0	0	0	0	0	0	0	0	0	0	0	0	0
OTU_656	Archaea	Thaumarchaeota	Marine Group I	Unclassified	Unclassified	Unclassified	Unclassified	0	0	0	0	0	0	0	0	0	0	0	0	0	1	0	0	0	0	0	0	0	0
OTU_657	Archaea	Marine Hydrothermal Vent Group(MHVG)	uncultured marine euryarchaeote	uncultured marine euryarchaeote	uncultured marine euryarchaeote	uncultured marine euryarchaeote	uncultured marine euryarchaeote	0	0	0	1	0	0	0	0	0	0	0	0	0	0	0	2	0	0	0	0	0	0
OTU_658	Archaea	Thaumarchaeota	Marine Benthic Group A	uncultured crenarchaeote	uncultured crenarchaeote	uncultured crenarchaeote	uncultured crenarchaeote	0	0	0	0	0	0	0	0	0	0	0	0	0	1	0	10	10	0	0	0	0	0
OTU_659	Archaea	Thaumarchaeota	Marine Group I	Unclassified	Unclassified	Unclassified	Unclassified	0	0	1	0	0	0	0	0	0	0	0	0	0	0	0	0	0	0	0	0	0	2
OTU_66	Archaea	Thaumarchaeota	Marine Group I	uncultured marine archaeon	uncultured marine archaeon	uncultured marine archaeon	uncultured marine archaeon	5	65	172	186	191	80	0	58	27	101	4	1	95	112	368	162	93	0	30	10	126	102
OTU_660	Archaea	Thaumarchaeota	Marine Group I	Unclassified	Unclassified	Unclassified	Unclassified	0	0	0	0	0	0	0	0	0	0	0	0	0	0	0	0	0	0	0	0	0	2
OTU_661	Archaea	Thaumarchaeota	Marine Group I	Unclassified	Unclassified	Unclassified	Unclassified	0	0	0	0	0	0	0	0	0	0	0	0	0	0	0	0	0	0	0	0	0	1
OTU_662	Bacteria	Unclassified	Unclassified	Unclassified	Unclassified	Unclassified	Unclassified	0	0	0	0	0	0	0	0	1	0	0	0	0	0	0	0	0	0	0	0	0	0
OTU_663	Archaea	Woesearchaeota (DHVEG-6)	Unclassified	Unclassified	Unclassified	Unclassified	Unclassified	0	0	0	0	0	0	0	0	0	0	0	0	0	0	0	0	0	0	0	1	0	0
OTU_664	Archaea	Thaumarchaeota	Marine Group I	uncultured thaumarchaeote	uncultured thaumarchaeote	uncultured thaumarchaeote	uncultured thaumarchaeote	0	0	0	0	0	0	0	0	1	0	0	0	1	0	0	0	0	0	3	0	0	0
OTU_665	Archaea	Euryarchaeota	Thermoplasmata	Thermoplasmatales	Marine Group III	uncultured marine archaeon	uncultured marine archaeon	0	0	0	0	0	0	0	0	0	0	0	0	0	0	0	0	0	0	0	2	0	0
OTU_666	Archaea	Woesearchaeota (DHVEG-6)	uncultured euryarchaeote	uncultured euryarchaeote	uncultured euryarchaeote	uncultured euryarchaeote	uncultured euryarchaeote	0	0	0	0	0	0	0	0	0	0	0	0	0	0	0	0	0	0	0	1	0	0
OTU_667	Bacteria	Proteobacteria	Alphaproteobacteria	Rhizobiales	Phyllobacteriaceae	Hoeflea	uncultured Hoeflea sp.	0	0	0	0	0	0	0	0	1	0	0	0	0	0	0	0	0	0	1	0	0	0
OTU_668	Archaea	Thaumarchaeota	Marine Group I	Unknown Order	Unknown Family	Candidatus Nitrosopelagicus	Unclassified	0	0	0	0	0	0	2	0	0	0	0	2	0	0	0	0	0	0	0	0	0	0
OTU_669	Archaea	Thaumarchaeota	Marine Group I	Unknown Order	Unknown Family	Candidatus Nitrosopelagicus	uncultured marine archaeon	0	0	0	0	0	0	0	0	0	0	0	0	0	0	0	0	0	1	0	0	0	0
OTU_67	Archaea	Thaumarchaeota	Marine Benthic Group A	uncultured crenarchaeote	uncultured crenarchaeote	uncultured crenarchaeote	uncultured crenarchaeote	0	0	4	0	26	4	0	0	0	0	0	0	0	5	0	5	4	0	1	77	0	0
OTU_670	Archaea	Thaumarchaeota	Marine Group I	unidentified archaeon	unidentified archaeon	unidentified archaeon	unidentified archaeon	0	0	0	0	0	0	0	0	0	0	0	0	0	0	0	0	0	0	1	0	0	0
OTU_671	Archaea	Euryarchaeota	Halobacteria	Halobacteriales	Halobacteriaceae	Candidatus Halobonum	uncultured archaeon	0	0	0	0	2	0	0	0	0	0	0	0	0	2	1	1	1	0	1	0	0	0
OTU_672	Archaea	Thaumarchaeota	Marine Group I	Unknown Order	Unknown Family	Candidatus Nitrosopelagicus	marine metagenome	0	0	0	0	0	0	0	0	0	0	0	0	0	0	0	0	0	1	0	0	0	0
OTU_673	Archaea	Thaumarchaeota	Marine Group I	Unclassified	Unclassified	Unclassified	Unclassified	0	0	0	1	0	0	0	0	0	0	3	0	0	0	0	0	0	0	0	0	0	0
OTU_674	Archaea	Thaumarchaeota	Marine Benthic Group A	uncultured marine archaeon	uncultured marine archaeon	uncultured marine archaeon	uncultured marine archaeon	0	0	0	0	0	0	0	0	3	0	0	0	0	0	0	0	0	0	7	0	0	0
OTU_675	Archaea	Thaumarchaeota	Marine Group I	uncultured marine archaeon	uncultured marine archaeon	uncultured marine archaeon	uncultured marine archaeon	16	326	418	59	12	30	0	156	347	517	0	5	390	139	32	22	1	0	240	6	8	0
OTU_676	Archaea	Euryarchaeota	Thermoplasmata	Thermoplasmatales	Marine Group II	uncultured marine group II euryarchaeote HF130_27A09	uncultured marine group II euryarchaeote HF130_27A09	0	0	0	0	0	0	0	0	0	0	0	0	1	0	0	0	0	0	0	0	0	0
OTU_677	Archaea	Euryarchaeota	Thermoplasmata	Thermoplasmatales	Marine Group II	uncultured marine group II euryarchaeote HF200_89A11	uncultured marine group II euryarchaeote HF200_89A11	3	0	0	0	0	0	1	0	0	0	0	2	1	0	0	0	0	0	0	0	0	0
OTU_678	Archaea	Euryarchaeota	Thermoplasmata	Thermoplasmatales	Marine Group II	uncultured marine group II euryarchaeote HF10_36B02	uncultured marine group II euryarchaeote HF10_36B02	1	0	0	0	0	0	0	0	0	0	0	0	0	0	0	0	0	0	0	0	0	0
OTU_679	Archaea	Thaumarchaeota	Marine Group I	Unclassified	Unclassified	Unclassified	Unclassified	0	0	0	0	0	0	0	0	2	0	0	0	0	0	0	0	0	0	3	0	0	0
OTU_68	Archaea	Thaumarchaeota	Marine Group I	Unknown Order	Unknown Family	Candidatus Nitrosopelagicus	uncultured marine archaeon DCM871	3	125	0	1	0	0	1	0	286	101	0	3	84	0	0	0	0	0	195	0	0	3
OTU_680	Archaea	Thaumarchaeota	Marine Group I	Unknown Order	Unknown Family	Candidatus Nitrosopelagicus	uncultured archaeon	0	14	0	0	0	0	0	0	26	12	0	7	13	0	0	0	0	1	13	0	0	0
OTU_681	Archaea	Thaumarchaeota	Marine Group I	uncultured marine archaeon	uncultured marine archaeon	uncultured marine archaeon	uncultured marine archaeon	0	0	0	0	0	0	0	0	0	0	0	0	0	0	0	0	0	0	0	0	0	2
OTU_682	Archaea	Thaumarchaeota	Marine Group I	uncultured marine archaeon	uncultured marine archaeon	uncultured marine archaeon	uncultured marine archaeon	0	2	3	1	0	0	0	0	2	1	0	0	0	0	0	0	0	0	4	0	0	0
OTU_683	Archaea	Thaumarchaeota	Marine Benthic Group A	uncultured marine group I thaumarchaeote	uncultured marine group I thaumarchaeote	uncultured marine group I thaumarchaeote	uncultured marine group I thaumarchaeote	0	10	28	5	11	0	0	2	105	25	54	0	13	16	14	4	9	0	1	0	39	244
OTU_684	Archaea	Euryarchaeota	Thermoplasmata	Thermoplasmatales	Marine Group II	uncultured marine group II euryarchaeote HF500_30A08	uncultured marine group II euryarchaeote HF500_30A08	0	0	0	0	0	0	0	0	0	0	0	0	0	0	0	0	0	0	0	0	1	0
OTU_685	Archaea	Thaumarchaeota	Marine Group I	Unclassified	Unclassified	Unclassified	Unclassified	0	0	10	44	38	25	0	0	0	8	2	0	2	3	0	9	12	0	0	3	20	24
OTU_686	Bacteria	Proteobacteria	Unclassified	Unclassified	Unclassified	Unclassified	Unclassified	1	0	0	0	0	0	0	0	0	0	0	0	0	0	0	0	0	0	0	0	0	0
OTU_687	Archaea	Woesearchaeota (DHVEG-6)	uncultured euryarchaeote	uncultured euryarchaeote	uncultured euryarchaeote	uncultured euryarchaeote	uncultured euryarchaeote	0	0	0	0	1	0	0	0	0	0	0	0	0	0	8	1	0	0	0	0	0	0
OTU_688	Archaea	Euryarchaeota	Thermoplasmata	Thermoplasmatales	Marine Group II	uncultured marine group II euryarchaeote HF70_91G08	uncultured marine group II euryarchaeote HF70_91G08	0	0	0	0	0	0	0	0	0	0	0	0	0	1	2	0	1	0	0	0	0	0
OTU_689	Archaea	Thaumarchaeota	Marine Group I	Unclassified	Unclassified	Unclassified	Unclassified	0	0	0	0	0	0	0	0	0	0	0	0	0	0	0	2	0	0	0	0	0	0
OTU_69	Archaea	Euryarchaeota	Thermoplasmata	Thermoplasmatales	Marine Group II	uncultured marine archaeon	uncultured marine archaeon	140	0	0	0	5	3	28	26	0	0	0	168	8	0	0	0	1	0	0	52	0	0
OTU_690	Archaea	Euryarchaeota	Thermoplasmata	Thermoplasmatales	Marine Group II	uncultured marine group II euryarchaeote	uncultured marine group II euryarchaeote	0	0	0	0	0	0	0	0	0	0	0	0	0	0	0	1	0	0	0	0	0	0
OTU_691	Archaea	Woesearchaeota (DHVEG-6)	uncultured crenarchaeote	uncultured crenarchaeote	uncultured crenarchaeote	uncultured crenarchaeote	uncultured crenarchaeote	0	0	0	0	0	0	0	0	0	0	0	0	0	0	0	3	0	0	0	0	0	0
OTU_692	Archaea	Woesearchaeota (DHVEG-6)	Unclassified	Unclassified	Unclassified	Unclassified	Unclassified	0	0	0	0	0	1	0	0	0	0	0	0	0	0	0	0	0	0	0	0	0	0
OTU_693	Archaea	Thaumarchaeota	Unclassified	Unclassified	Unclassified	Unclassified	Unclassified	0	0	0	0	0	1	0	0	0	0	0	0	0	0	0	0	0	0	0	0	0	0
OTU_694	Archaea	Thaumarchaeota	Marine Group I	uncultured marine group I thaumarchaeote	uncultured marine group I thaumarchaeote	uncultured marine group I thaumarchaeote	uncultured marine group I thaumarchaeote	0	0	0	0	1	2	0	0	0	0	0	0	0	0	0	0	0	0	0	0	0	1
OTU_695	Archaea	Thaumarchaeota	Marine Group I	uncultured archaeon	uncultured archaeon	uncultured archaeon	uncultured archaeon	0	0	0	0	0	0	0	0	0	0	0	0	0	0	0	0	0	0	0	1	0	0
OTU_696	Archaea	Thaumarchaeota	Marine Group I	uncultured marine archaeon	uncultured marine archaeon	uncultured marine archaeon	uncultured marine archaeon	0	0	0	0	0	0	0	0	0	0	0	0	1	0	0	0	0	0	0	0	0	0
OTU_697	Archaea	Thaumarchaeota	Marine Group I	uncultured marine archaeon	uncultured marine archaeon	uncultured marine archaeon	uncultured marine archaeon	0	19	39	13	14	8	0	14	18	14	0	0	32	6	0	1	1	0	30	2	10	6
OTU_698	Archaea	Euryarchaeota	Thermoplasmata	Thermoplasmatales	Marine Group II	uncultured marine microorganism HF200_10-06-02	uncultured marine microorganism HF200_10-06-02	0	0	0	0	0	0	0	0	0	0	0	0	2	0	0	0	0	0	0	0	0	0
OTU_699	Archaea	Thaumarchaeota	Marine Group I	uncultured marine group I thaumarchaeote	uncultured marine group I thaumarchaeote	uncultured marine group I thaumarchaeote	uncultured marine group I thaumarchaeote	0	0	0	0	0	0	0	0	0	0	0	0	0	3	5	1	0	0	0	0	0	0
OTU_7	Archaea	Euryarchaeota	Thermoplasmata	Thermoplasmatales	Marine Group II	Unclassified	Unclassified	273	1916	1160	211	152	154	113	345	454	170	763	177	1823	155	16	39	373	78	218	1645	1344	0
OTU_70	Archaea	Thaumarchaeota	Marine Group I	Unknown Order	Unknown Family	Candidatus Nitrosopumilus	uncultured marine archaeon	0	0	0	1	13	34	0	0	0	0	0	0	0	0	2	20	37	0	0	0	0	0
OTU_700	Archaea	Euryarchaeota	Thermoplasmata	Thermoplasmatales	Marine Group II	uncultured marine group II euryarchaeote HF130_17B12	uncultured marine group II euryarchaeote HF130_17B12	0	0	0	0	0	0	0	0	0	0	0	1	0	0	0	0	0	0	0	0	0	0
OTU_701	Bacteria	Unclassified	Unclassified	Unclassified	Unclassified	Unclassified	Unclassified	0	0	0	0	0	0	0	0	0	0	0	0	0	0	0	0	0	0	0	0	0	1
OTU_702	Archaea	Euryarchaeota	Thermoplasmata	Thermoplasmatales	Marine Group III	uncultured marine group III euryarchaeote	uncultured marine group III euryarchaeote	0	0	0	0	0	0	0	0	0	0	0	0	0	1	0	0	0	0	0	0	0	0
OTU_703	Archaea	Euryarchaeota	Thermoplasmata	Thermoplasmatales	Marine Group III	uncultured marine archaeon	uncultured marine archaeon	0	1	1	0	0	0	0	1	0	0	0	0	0	0	0	1	0	0	0	0	0	0
OTU_704	Archaea	Euryarchaeota	Thermoplasmata	Thermoplasmatales	Marine Group II	Unclassified	Unclassified	0	0	0	0	0	0	0	1	0	0	0	0	0	0	0	0	0	0	0	0	0	0
OTU_705	Archaea	Thaumarchaeota	Marine Group I	Unclassified	Unclassified	Unclassified	Unclassified	0	0	0	0	0	1	0	0	0	0	0	0	0	0	1	1	2	0	0	0	0	0
OTU_706	Archaea	Thaumarchaeota	AK59	uncultured thaumarchaeote	uncultured thaumarchaeote	uncultured thaumarchaeote	uncultured thaumarchaeote	0	0	0	0	0	0	0	0	0	0	0	0	0	0	0	0	1	0	0	0	0	0
OTU_707	Archaea	Thaumarchaeota	Marine Group I	Unclassified	Unclassified	Unclassified	Unclassified	0	1	1	0	0	0	0	0	2	1	0	0	1	3	0	0	0	0	1	0	1	0
OTU_708	Bacteria	Bacteroidetes	Sphingobacteriia	Sphingobacteriales	Chitinophagaceae	Hydrotalea	uncultured Bacteroidetes bacterium	0	0	0	0	0	0	0	0	0	0	1	0	0	0	0	0	0	0	0	0	0	0
OTU_709	Archaea	Thaumarchaeota	Marine Group I	Marine Group I thaumarchaeote SCGC AAA799-D07	Marine Group I thaumarchaeote SCGC AAA799-D07	Marine Group I thaumarchaeote SCGC AAA799-D07	Marine Group I thaumarchaeote SCGC AAA799-D07	0	0	0	0	0	0	0	0	0	0	0	0	0	0	0	0	0	0	1	0	0	0
OTU_71	Archaea	Woesearchaeota (DHVEG-6)	uncultured euryarchaeote	uncultured euryarchaeote	uncultured euryarchaeote	uncultured euryarchaeote	uncultured euryarchaeote	0	0	0	10	14	5	0	0	0	0	0	0	0	0	0	1	3	0	1	38	0	0
OTU_710	Archaea	Thaumarchaeota	Marine Group I	Unclassified	Unclassified	Unclassified	Unclassified	0	0	0	0	0	0	0	0	0	1	0	0	0	0	0	0	0	0	0	0	0	0
OTU_711	Archaea	Unclassified	Unclassified	Unclassified	Unclassified	Unclassified	Unclassified	0	0	0	0	0	0	0	0	0	1	0	0	0	0	0	0	0	0	0	0	0	0
OTU_712	Unclassified	Unclassified	Unclassified	Unclassified	Unclassified	Unclassified	Unclassified	0	0	0	0	0	0	0	0	0	3	0	0	0	0	0	0	0	0	0	0	0	0
OTU_713	Archaea	Thaumarchaeota	Marine Group I	Unclassified	Unclassified	Unclassified	Unclassified	0	0	0	1	0	1	0	0	0	2	1	0	0	0	0	0	0	0	0	0	0	1
OTU_714	Archaea	Euryarchaeota	Thermoplasmata	Thermoplasmatales	Marine Group II	uncultured Rhizaria	uncultured Rhizaria	1	0	0	0	0	0	0	0	0	0	0	0	1	0	0	0	0	0	0	0	0	0
OTU_715	Archaea	Thaumarchaeota	Marine Group I	uncultured marine archaeon	uncultured marine archaeon	uncultured marine archaeon	uncultured marine archaeon	0	1	0	0	0	0	0	0	4	8	0	0	6	0	0	0	0	0	3	0	0	0
OTU_716	Archaea	Thaumarchaeota	Marine Group I	uncultured marine archaeon	uncultured marine archaeon	uncultured marine archaeon	uncultured marine archaeon	0	0	3	1	0	0	0	0	0	1	1	0	0	0	0	0	1	0	0	0	0	1
OTU_717	Archaea	Thaumarchaeota	Marine Group I	uncultured marine archaeon	uncultured marine archaeon	uncultured marine archaeon	uncultured marine archaeon	0	0	0	2	0	1	0	0	0	0	0	0	0	0	0	0	0	0	0	0	0	0
OTU_718	Archaea	Thaumarchaeota	Marine Group I	Unknown Order	Unknown Family	Candidatus Nitrosopumilus	uncultured crenarchaeote	0	0	0	3	7	55	0	11	1	0	0	3	0	0	0	1	5	0	0	0	0	0
OTU_719	Archaea	Thaumarchaeota	Marine Group I	Unknown Order	Unknown Family	Candidatus Nitrosopumilus	uncultured crenarchaeote	0	0	0	0	2	11	0	0	0	0	0	0	0	0	0	0	1	0	0	0	0	0
OTU_72	Archaea	Thaumarchaeota	Marine Group I	uncultured thaumarchaeote	uncultured thaumarchaeote	uncultured thaumarchaeote	uncultured thaumarchaeote	0	9	0	0	0	0	0	0	4	1	0	0	7	0	0	0	0	0	0	0	0	0
OTU_720	Archaea	Thaumarchaeota	Marine Group I	uncultured marine archaeon	uncultured marine archaeon	uncultured marine archaeon	uncultured marine archaeon	0	0	2	51	73	40	0	6	0	0	0	0	0	6	0	34	2	0	0	0	0	0
OTU_721	Archaea	Thaumarchaeota	Marine Group I	uncultured marine archaeon	uncultured marine archaeon	uncultured marine archaeon	uncultured marine archaeon	0	0	0	0	1	0	0	0	0	0	0	0	0	4	6	1	1	0	0	0	0	0
OTU_722	Archaea	Thaumarchaeota	Marine Group I	uncultured thaumarchaeote	uncultured thaumarchaeote	uncultured thaumarchaeote	uncultured thaumarchaeote	1	47	55	5	2	1	4	21	21	8	0	2	53	11	0	0	0	0	34	1	0	0
OTU_723	Archaea	Thaumarchaeota	Marine Group I	Unknown Order	Unknown Family	Candidatus Nitrosopelagicus	uncultured marine archaeon DCM871	0	0	0	0	0	0	0	0	1	0	0	0	0	0	0	0	0	0	0	0	0	0
OTU_724	Archaea	Euryarchaeota	Thermoplasmata	Thermoplasmatales	Marine Group II	uncultured marine archaeon	uncultured marine archaeon	2	0	0	0	0	0	0	0	0	0	0	0	0	0	0	0	0	0	0	0	0	0
OTU_725	Archaea	Thaumarchaeota	Marine Group I	Unknown Order	Unknown Family	Candidatus Nitrosopelagicus	marine metagenome	0	0	0	0	0	0	0	0	0	0	0	0	0	0	0	0	0	1	0	0	0	0
OTU_726	Archaea	Woesearchaeota (DHVEG-6)	uncultured euryarchaeote	uncultured euryarchaeote	uncultured euryarchaeote	uncultured euryarchaeote	uncultured euryarchaeote	0	0	0	0	0	0	0	0	0	0	0	0	0	0	0	0	0	1	0	0	0	0
OTU_727	Archaea	Euryarchaeota	Thermoplasmata	Thermoplasmatales	Marine Group II	uncultured deep-sea archaeon	uncultured deep-sea archaeon	0	0	0	0	0	0	0	0	0	0	3	0	0	0	0	0	0	0	0	0	0	0
OTU_728	Archaea	Euryarchaeota	Thermoplasmata	Thermoplasmatales	Marine Group II	Unclassified	Unclassified	0	0	0	0	0	0	0	0	0	0	0	2	1	0	0	0	0	2	0	0	0	0
OTU_729	Archaea	Euryarchaeota	Thermoplasmata	Thermoplasmatales	Marine Group III	uncultured marine archaeon	uncultured marine archaeon	0	0	4	0	1	0	0	13	0	0	0	0	6	1	0	0	1	0	0	14	0	0
OTU_73	Archaea	Euryarchaeota	Thermoplasmata	Thermoplasmatales	Marine Group II	uncultured marine group II euryarchaeote	uncultured marine group II euryarchaeote	0	0	0	0	8	7	0	0	0	0	0	0	0	0	0	1	1	0	0	0	0	0
OTU_730	Archaea	Thaumarchaeota	Marine Group I	Unclassified	Unclassified	Unclassified	Unclassified	0	0	1	8	1	1	0	0	0	0	0	0	0	0	0	0	0	0	0	0	4	0
OTU_731	Archaea	Thaumarchaeota	Marine Group I	uncultured marine archaeon	uncultured marine archaeon	uncultured marine archaeon	uncultured marine archaeon	0	0	0	0	0	0	0	0	0	0	0	0	0	0	0	0	0	0	1	0	0	0
OTU_732	Archaea	Thaumarchaeota	Marine Group I	Unclassified	Unclassified	Unclassified	Unclassified	0	1	0	0	0	0	0	0	0	0	0	0	0	0	0	0	0	0	0	0	0	0
OTU_733	Archaea	Thaumarchaeota	Marine Group I	Unclassified	Unclassified	Unclassified	Unclassified	0	0	0	0	0	0	0	0	0	1	0	0	0	0	0	0	0	0	2	0	0	0
OTU_734	Archaea	Thaumarchaeota	Marine Group I	unidentified archaeon	unidentified archaeon	unidentified archaeon	unidentified archaeon	3	23	1	1	0	0	0	0	117	103	1	0	19	1	0	0	0	0	83	0	1	0
OTU_735	Archaea	Euryarchaeota	Thermoplasmata	Thermoplasmatales	Marine Group III	uncultured marine archaeon	uncultured marine archaeon	0	0	0	0	0	0	0	0	0	0	0	0	1	0	0	0	0	0	0	0	0	0
OTU_736	Archaea	Woesearchaeota (DHVEG-6)	uncultured euryarchaeote	uncultured euryarchaeote	uncultured euryarchaeote	uncultured euryarchaeote	uncultured euryarchaeote	0	0	0	0	0	0	0	0	0	0	0	0	0	0	0	0	1	0	0	0	0	0
OTU_737	Archaea	Woesearchaeota (DHVEG-6)	uncultured archaeon	uncultured archaeon	uncultured archaeon	uncultured archaeon	uncultured archaeon	0	0	0	0	0	0	0	0	0	0	0	0	0	0	0	0	1	0	0	0	0	0
OTU_738	Archaea	Thaumarchaeota	Marine Group I	Unclassified	Unclassified	Unclassified	Unclassified	0	0	0	3	4	8	0	0	0	3	4	0	0	1	1	1	2	0	0	0	6	15
OTU_739	Archaea	Thaumarchaeota	Marine Group I	uncultured marine archaeon	uncultured marine archaeon	uncultured marine archaeon	uncultured marine archaeon	0	0	0	0	0	0	0	0	2	0	0	0	0	0	0	0	0	0	1	0	0	0
OTU_74	Archaea	Thaumarchaeota	Marine Group I	uncultured marine group I thaumarchaeote	uncultured marine group I thaumarchaeote	uncultured marine group I thaumarchaeote	uncultured marine group I thaumarchaeote	0	12	22	4	1	1	0	19	7	1	0	0	14	11	0	0	0	0	6	0	0	0
OTU_740	Archaea	Thaumarchaeota	Marine Benthic Group A	uncultured marine group I thaumarchaeote	uncultured marine group I thaumarchaeote	uncultured marine group I thaumarchaeote	uncultured marine group I thaumarchaeote	0	0	0	0	0	0	0	0	0	0	0	0	0	0	0	0	0	0	0	0	0	1
OTU_741	Archaea	Thaumarchaeota	Marine Group I	Unclassified	Unclassified	Unclassified	Unclassified	0	0	0	0	0	0	0	0	0	0	0	0	0	0	0	0	0	0	0	0	0	1
OTU_742	Archaea	Unclassified	Unclassified	Unclassified	Unclassified	Unclassified	Unclassified	0	0	0	0	0	0	0	0	0	0	0	0	0	0	0	0	0	0	0	0	0	2
OTU_743	Archaea	Thaumarchaeota	Marine Group I	uncultured marine group I thaumarchaeote	uncultured marine group I thaumarchaeote	uncultured marine group I thaumarchaeote	uncultured marine group I thaumarchaeote	0	0	0	0	0	0	0	0	0	0	0	0	0	0	0	0	0	0	0	0	0	1
OTU_744	Archaea	Thaumarchaeota	Marine Group I	Unclassified	Unclassified	Unclassified	Unclassified	0	0	0	0	1	0	0	0	0	0	0	0	0	0	0	0	0	0	0	0	0	0
OTU_745	Archaea	Euryarchaeota	Thermoplasmata	Thermoplasmatales	Marine Group III	uncultured marine archaeon	uncultured marine archaeon	0	1	1	0	0	0	0	9	0	0	0	0	2	19	3	3	0	0	0	5	0	0
OTU_746	Archaea	Euryarchaeota	Thermoplasmata	Thermoplasmatales	Marine Group III	uncultured marine archaeon	uncultured marine archaeon	0	0	0	0	0	0	0	0	0	0	0	0	0	2	0	0	0	0	0	0	0	0
OTU_747	Archaea	Woesearchaeota (DHVEG-6)	uncultured euryarchaeote	uncultured euryarchaeote	uncultured euryarchaeote	uncultured euryarchaeote	uncultured euryarchaeote	0	0	0	0	0	0	0	0	0	0	0	0	0	0	0	0	2	0	0	0	0	0
OTU_748	Archaea	Euryarchaeota	Thermoplasmata	Thermoplasmatales	Marine Group II	uncultured marine group II euryarchaeote HF130_27A09	uncultured marine group II euryarchaeote HF130_27A09	0	1	0	0	0	0	0	0	0	0	0	0	1	0	0	0	0	0	0	0	0	0
OTU_749	Archaea	Euryarchaeota	Thermoplasmata	Thermoplasmatales	Marine Group II	uncultured marine group II euryarchaeote HF130_27A09	uncultured marine group II euryarchaeote HF130_27A09	0	7	0	0	0	0	0	10	0	0	0	0	6	4	0	0	0	0	0	19	0	0
OTU_75	Archaea	Euryarchaeota	Thermoplasmata	Thermoplasmatales	Marine Group II	Unclassified	Unclassified	0	0	0	0	2	5	0	0	0	0	0	0	0	0	0	9	6	0	0	0	0	0
OTU_750	Archaea	Thaumarchaeota	Marine Group I	Unclassified	Unclassified	Unclassified	Unclassified	0	0	0	0	0	1	0	0	0	0	1	0	0	0	0	0	0	0	0	0	0	0
OTU_751	Archaea	Euryarchaeota	Thermoplasmata	Thermoplasmatales	Marine Group II	uncultured marine group II euryarchaeote HF500_30A08	uncultured marine group II euryarchaeote HF500_30A08	0	0	0	0	0	0	0	0	0	0	5	0	0	0	0	0	0	0	0	0	0	0
OTU_752	Archaea	Thaumarchaeota	Marine Group I	uncultured marine archaeon	uncultured marine archaeon	uncultured marine archaeon	uncultured marine archaeon	0	2	9	2	1	1	0	1	1	2	0	0	2	1	0	0	1	0	1	0	0	0
OTU_753	Archaea	Thaumarchaeota	Marine Group I	Unclassified	Unclassified	Unclassified	Unclassified	0	0	0	1	0	0	0	1	0	0	0	0	0	0	0	0	1	0	0	0	0	0
OTU_754	Archaea	Euryarchaeota	Thermoplasmata	Thermoplasmatales	Marine Group II	Unclassified	Unclassified	0	3	3	98	249	156	0	0	2	0	10	2	9	4	0	59	5	0	1	0	3	0
OTU_755	Archaea	Unclassified	Unclassified	Unclassified	Unclassified	Unclassified	Unclassified	0	0	0	0	0	0	0	2	0	0	0	0	0	0	0	0	0	0	0	0	0	0
OTU_756	Archaea	Euryarchaeota	Thermoplasmata	Thermoplasmatales	Marine Group II	uncultured archeon 'KTK 31A'	uncultured archeon 'KTK 31A'	0	0	0	0	0	0	0	1	0	0	0	0	0	0	0	0	0	0	0	0	0	0
OTU_757	Archaea	Thaumarchaeota	Marine Group I	uncultured marine archaeon	uncultured marine archaeon	uncultured marine archaeon	uncultured marine archaeon	0	1	5	13	6	3	0	3	1	1	0	1	4	16	0	4	1	0	5	0	2	1
OTU_758	Archaea	Euryarchaeota	Thermoplasmata	Thermoplasmatales	Marine Group II	uncultured marine group II euryarchaeote HF70_91G08	uncultured marine group II euryarchaeote HF70_91G08	0	0	0	0	0	0	1	0	0	0	0	0	0	0	0	0	0	0	0	0	0	0
OTU_759	Archaea	Thaumarchaeota	Marine Group I	Unclassified	Unclassified	Unclassified	Unclassified	1	0	0	0	0	1	0	0	0	0	0	0	2	0	0	0	0	0	0	0	0	0
OTU_76	Archaea	Euryarchaeota	Thermoplasmata	Thermoplasmatales	Marine Group II	uncultured marine group II euryarchaeote	uncultured marine group II euryarchaeote	694	43	1	0	2	8	280	67	0	0	0	666	21	1	0	1	0	94	0	0	0	0
OTU_760	Archaea	Euryarchaeota	Thermoplasmata	Thermoplasmatales	Marine Group III	uncultured marine group III euryarchaeote HF10_21C05	uncultured marine group III euryarchaeote HF10_21C05	0	0	0	0	0	0	1	0	0	0	0	0	0	0	0	0	0	0	0	0	0	0
OTU_761	Archaea	Euryarchaeota	Thermoplasmata	Thermoplasmatales	Marine Group III	uncultured marine archaeon	uncultured marine archaeon	0	1	0	2	14	20	0	4	0	0	0	0	0	0	2	5	11	0	0	1	0	0
OTU_762	Archaea	Woesearchaeota (DHVEG-6)	Unclassified	Unclassified	Unclassified	Unclassified	Unclassified	0	1	0	0	3	0	0	0	0	0	0	0	0	0	0	0	0	0	0	0	0	0
OTU_763	Unclassified	Unclassified	Unclassified	Unclassified	Unclassified	Unclassified	Unclassified	0	0	0	0	0	0	0	0	3	0	0	0	0	0	0	0	0	0	0	0	0	0
OTU_764	Unclassified	Unclassified	Unclassified	Unclassified	Unclassified	Unclassified	Unclassified	0	0	0	0	0	0	1	0	0	0	0	0	0	0	0	0	0	0	0	0	0	0
OTU_765	Archaea	Euryarchaeota	Thermoplasmata	Thermoplasmatales	Marine Group III	uncultured archaeon	uncultured archaeon	0	0	0	1	1	0	0	0	0	0	0	0	0	0	0	0	0	0	0	0	0	0
OTU_766	Archaea	Thaumarchaeota	Marine Group I	uncultured marine group I thaumarchaeote	uncultured marine group I thaumarchaeote	uncultured marine group I thaumarchaeote	uncultured marine group I thaumarchaeote	0	0	0	3	7	3	0	0	0	0	1	0	0	0	0	0	0	0	0	1	2	2
OTU_767	Archaea	Thaumarchaeota	Marine Group I	uncultured marine archaeon	uncultured marine archaeon	uncultured marine archaeon	uncultured marine archaeon	0	0	0	1	0	1	0	0	0	0	0	0	0	0	0	0	0	0	0	0	0	0
OTU_768	Archaea	Thaumarchaeota	Marine Benthic Group A	uncultured marine archaeon	uncultured marine archaeon	uncultured marine archaeon	uncultured marine archaeon	0	0	0	0	0	0	0	0	0	0	0	0	0	2	0	1	2	0	0	0	0	0
OTU_769	Archaea	Thaumarchaeota	Marine Group I	uncultured marine archaeon	uncultured marine archaeon	uncultured marine archaeon	uncultured marine archaeon	1	11	1	4	1	0	0	0	61	53	0	0	30	0	0	0	0	0	16	0	4	3
OTU_77	Archaea	Thaumarchaeota	Marine Group I	Unknown Order	Unknown Family	Candidatus Nitrosopelagicus	uncultured archaeon	0	18	0	0	0	0	2	0	17	0	0	0	18	0	0	0	0	0	0	0	0	0
OTU_770	Archaea	Thaumarchaeota	Marine Group I	Unclassified	Unclassified	Unclassified	Unclassified	0	0	3	9	5	6	0	0	0	3	17	0	0	2	0	1	3	0	0	0	2	8
OTU_771	Archaea	Thaumarchaeota	Marine Group I	Unclassified	Unclassified	Unclassified	Unclassified	0	0	2	0	0	0	0	0	1	2	0	0	0	8	2	0	0	0	1	0	0	0
OTU_772	Archaea	Thaumarchaeota	Marine Group I	Unclassified	Unclassified	Unclassified	Unclassified	0	0	0	0	0	0	0	0	0	0	0	0	0	1	0	0	0	0	0	0	0	0
OTU_773	Unclassified	Unclassified	Unclassified	Unclassified	Unclassified	Unclassified	Unclassified	0	0	0	0	0	0	0	0	0	0	0	1	0	0	0	0	0	0	0	0	0	0
OTU_774	Archaea	Thaumarchaeota	Marine Group I	uncultured marine group I thaumarchaeote	uncultured marine group I thaumarchaeote	uncultured marine group I thaumarchaeote	uncultured marine group I thaumarchaeote	0	0	1	2	2	1	0	1	0	1	2	0	0	6	30	9	10	0	0	1	0	1
OTU_775	Archaea	Euryarchaeota	Thermoplasmata	Thermoplasmatales	Marine Group II	uncultured marine group II euryarchaeote	uncultured marine group II euryarchaeote	0	4	0	0	0	1	0	0	0	0	0	0	4	0	0	0	0	0	0	0	0	0
OTU_776	Bacteria	Bacteroidetes	Flavobacteriia	Flavobacteriales	Flavobacteriaceae	NS2b marine group	uncultured Bacteroidetes bacterium	0	0	0	0	0	0	0	0	0	0	0	1	0	0	0	0	0	0	0	0	0	0
OTU_777	Archaea	Thaumarchaeota	Marine Group I	Unclassified	Unclassified	Unclassified	Unclassified	0	0	0	0	0	0	0	0	1	0	0	0	0	0	0	0	0	0	0	0	0	0
OTU_778	Archaea	Thaumarchaeota	Marine Group I	Unknown Order	Unknown Family	Candidatus Nitrosopumilus	uncultured marine archaeon	0	0	0	1	6	9	0	0	0	0	0	0	0	0	0	0	2	0	0	0	0	0
OTU_779	Archaea	Thaumarchaeota	Marine Group I	Unclassified	Unclassified	Unclassified	Unclassified	0	0	0	0	0	1	0	0	0	0	0	0	0	0	0	0	0	0	0	0	0	0
OTU_78	Archaea	Thaumarchaeota	Marine Group I	Unclassified	Unclassified	Unclassified	Unclassified	1	28	1	0	0	0	4	0	40	17	0	4	15	0	0	0	0	0	34	0	0	0
OTU_780	Archaea	Woesearchaeota (DHVEG-6)	uncultured euryarchaeote	uncultured euryarchaeote	uncultured euryarchaeote	uncultured euryarchaeote	uncultured euryarchaeote	0	0	0	1	2	1	0	1	0	0	0	0	0	0	0	0	1	0	1	2	0	0
OTU_781	Unclassified	Unclassified	Unclassified	Unclassified	Unclassified	Unclassified	Unclassified	0	0	0	0	0	0	1	0	0	0	0	0	0	0	0	0	0	0	0	0	0	0
OTU_782	Archaea	Euryarchaeota	Thermoplasmata	Thermoplasmatales	Marine Group III	uncultured marine group III euryarchaeote HF10_21C05	uncultured marine group III euryarchaeote HF10_21C05	4	0	0	0	0	0	18	0	0	0	0	7	0	0	0	0	0	0	0	0	0	0
OTU_783	Unclassified	Unclassified	Unclassified	Unclassified	Unclassified	Unclassified	Unclassified	1	0	0	0	0	0	0	0	0	0	0	0	0	0	0	0	0	0	0	0	0	0
OTU_784	Archaea	Woesearchaeota (DHVEG-6)	uncultured euryarchaeote	uncultured euryarchaeote	uncultured euryarchaeote	uncultured euryarchaeote	uncultured euryarchaeote	0	0	0	2	0	0	0	0	0	0	0	0	0	0	0	0	0	0	0	0	0	0
OTU_785	Archaea	Thaumarchaeota	Marine Group I	uncultured Nitrosopumilales archaeon	uncultured Nitrosopumilales archaeon	uncultured Nitrosopumilales archaeon	uncultured Nitrosopumilales archaeon	0	0	0	1	0	1	0	0	0	0	0	0	0	0	0	0	0	0	0	0	0	0
OTU_786	Archaea	Unclassified	Unclassified	Unclassified	Unclassified	Unclassified	Unclassified	0	0	0	0	0	0	0	0	0	0	0	0	0	0	0	0	0	0	1	0	0	1
OTU_787	Archaea	Euryarchaeota	Methanomicrobia	Methanosarcinales	Methanosaetaceae	Methanosaeta	uncultured Methanosarcinales archaeon	0	0	0	0	0	0	0	0	0	1	0	0	0	0	0	0	0	1	0	0	0	0
OTU_788	Archaea	Euryarchaeota	Thermoplasmata	Thermoplasmatales	Marine Group III	uncultured archaeon	uncultured archaeon	0	0	0	0	0	0	0	0	0	0	0	0	0	2	1	0	0	0	0	0	0	0
OTU_789	Archaea	Thaumarchaeota	Marine Group I	Unclassified	Unclassified	Unclassified	Unclassified	0	0	0	0	0	0	0	0	0	0	0	0	0	0	1	0	0	0	0	0	0	0
OTU_79	Archaea	Euryarchaeota	Thermoplasmata	Thermoplasmatales	Marine Group II	uncultured marine group II euryarchaeote	uncultured marine group II euryarchaeote	0	0	0	9	14	41	0	0	0	0	0	0	0	4	0	10	25	0	0	5	0	0
OTU_790	Archaea	Thaumarchaeota	Marine Group I	uncultured marine thaumarchaeote KM3_90_C11	uncultured marine thaumarchaeote KM3_90_C11	uncultured marine thaumarchaeote KM3_90_C11	uncultured marine thaumarchaeote KM3_90_C11	0	0	0	0	0	0	0	0	1	0	0	0	0	4	0	0	0	0	0	0	0	0
OTU_791	Archaea	Thaumarchaeota	Marine Benthic Group A	uncultured marine archaeon	uncultured marine archaeon	uncultured marine archaeon	uncultured marine archaeon	0	0	0	0	0	0	0	0	0	0	0	0	0	0	2	0	0	0	0	0	0	0
OTU_792	Archaea	Euryarchaeota	Thermoplasmata	Thermoplasmatales	Marine Group III	uncultured marine group III euryarchaeote HF10_21C05	uncultured marine group III euryarchaeote HF10_21C05	1	0	0	0	0	0	0	0	0	0	0	0	0	0	0	0	0	0	0	0	0	0
OTU_793	Archaea	Euryarchaeota	Thermoplasmata	Thermoplasmatales	Marine Group II	uncultured marine group II euryarchaeote HF10_36B02	uncultured marine group II euryarchaeote HF10_36B02	1	0	0	0	0	0	0	0	0	0	0	0	0	0	0	0	0	0	0	0	0	0
OTU_794	Archaea	Euryarchaeota	Thermoplasmata	Thermoplasmatales	Marine Group II	uncultured marine group II euryarchaeote HF500_30A08	uncultured marine group II euryarchaeote HF500_30A08	0	1	0	0	0	0	0	0	0	0	0	0	0	0	0	0	0	0	0	0	0	0
OTU_795	Archaea	Euryarchaeota	Thermoplasmata	Thermoplasmatales	Marine Group II	uncultured marine group II euryarchaeote HF70_91G08	uncultured marine group II euryarchaeote HF70_91G08	163	85	0	2	3	11	172	1	0	114	1	357	20	0	0	0	1	0	0	1	2	0
OTU_796	Archaea	Thaumarchaeota	Unclassified	Unclassified	Unclassified	Unclassified	Unclassified	0	0	0	0	0	0	0	0	0	1	0	0	0	0	0	0	0	0	0	0	0	0
OTU_797	Archaea	Thaumarchaeota	Marine Group I	uncultured marine archaeon	uncultured marine archaeon	uncultured marine archaeon	uncultured marine archaeon	0	2	0	0	0	0	0	0	5	17	0	0	8	0	0	0	0	0	10	0	0	0
OTU_798	Archaea	Thaumarchaeota	Marine Group I	uncultured thaumarchaeote	uncultured thaumarchaeote	uncultured thaumarchaeote	uncultured thaumarchaeote	0	0	0	0	0	0	0	0	0	2	0	0	0	0	0	0	0	0	0	0	0	0
OTU_799	Archaea	Thaumarchaeota	Marine Group I	Unclassified	Unclassified	Unclassified	Unclassified	0	0	0	0	0	0	0	0	0	1	0	0	0	0	0	0	0	0	0	0	0	0
OTU_8	Archaea	Thaumarchaeota	Marine Group I	Unknown Order	Unknown Family	Candidatus Nitrosopelagicus	uncultured thaumarchaeote	81	43	1	2	1	15	1138	0	255	103	17	850	21	0	0	0	0	1739	110	0	3	120
OTU_80	Archaea	Thaumarchaeota	Marine Benthic Group A	uncultured crenarchaeote	uncultured crenarchaeote	uncultured crenarchaeote	uncultured crenarchaeote	0	7	0	0	5	1	0	0	92	0	0	0	6	2	0	1	2	2	0	0	1	0
OTU_800	Archaea	Thaumarchaeota	Marine Group I	uncultured marine archaeon	uncultured marine archaeon	uncultured marine archaeon	uncultured marine archaeon	0	1	0	0	0	0	0	0	0	0	0	0	0	0	0	0	0	0	0	0	0	0
OTU_801	Archaea	Thaumarchaeota	F9P122000-Arc-2-E02	uncultured marine archaeon	uncultured marine archaeon	uncultured marine archaeon	uncultured marine archaeon	0	0	0	0	0	0	0	0	0	0	0	0	0	0	0	0	0	0	0	1	0	0
OTU_802	Archaea	Woesearchaeota (DHVEG-6)	Unclassified	Unclassified	Unclassified	Unclassified	Unclassified	0	0	0	0	0	0	0	0	0	0	0	0	0	0	0	0	0	1	0	0	0	0
OTU_803	Archaea	Thaumarchaeota	Marine Group I	Unclassified	Unclassified	Unclassified	Unclassified	0	0	0	1	0	0	0	0	1	0	0	0	0	0	0	0	1	0	8	0	0	0
OTU_804	Archaea	Euryarchaeota	Thermoplasmata	Thermoplasmatales	Marine Group III	Unclassified	Unclassified	2	0	0	0	0	0	1	0	0	0	0	1	2	0	0	0	0	0	0	12	0	0
OTU_805	Archaea	Thaumarchaeota	Marine Group I	Unclassified	Unclassified	Unclassified	Unclassified	6	24	1	1	0	0	3	0	296	93	18	1	8	0	0	0	0	0	254	0	2	4
OTU_806	Archaea	Euryarchaeota	Thermoplasmata	Thermoplasmatales	Marine Group II	uncultured deep-sea archaeon	uncultured deep-sea archaeon	0	0	0	0	0	0	0	0	0	0	1	0	0	0	0	0	0	0	0	0	0	0
OTU_807	Archaea	Euryarchaeota	Thermoplasmata	Thermoplasmatales	Marine Group II	uncultured deep-sea archaeon	uncultured deep-sea archaeon	0	0	2	1	1	2	0	1	0	2	4	0	0	3	1	0	1	0	0	7	4	0
OTU_808	Archaea	Euryarchaeota	Thermoplasmata	Thermoplasmatales	Marine Group II	Unclassified	Unclassified	1	0	0	0	0	0	0	0	0	0	0	0	0	0	0	0	0	0	0	0	0	0
OTU_809	Archaea	Euryarchaeota	Methanomicrobia	Methanosarcinales	Methanosaetaceae	Methanosaeta	uncultured methanogenic archaeon	0	0	0	0	0	0	0	0	0	0	0	0	0	0	0	0	0	3	0	0	0	0
OTU_81	Archaea	Thaumarchaeota	Marine Group I	Unknown Order	Unknown Family	Candidatus Nitrosopelagicus	uncultured archaeon	1	25	0	0	0	0	0	0	30	0	0	0	12	0	0	0	0	0	22	0	0	0
OTU_810	Archaea	Unclassified	Unclassified	Unclassified	Unclassified	Unclassified	Unclassified	0	0	0	0	0	0	0	0	0	0	0	0	0	0	0	0	0	1	0	0	0	0
OTU_811	Archaea	Thaumarchaeota	AK31	uncultured archaeon	uncultured archaeon	uncultured archaeon	uncultured archaeon	0	0	2	0	0	0	0	0	0	0	0	0	0	0	0	0	0	0	0	0	0	0
OTU_812	Archaea	Thaumarchaeota	Marine Group I	uncultured marine archaeon	uncultured marine archaeon	uncultured marine archaeon	uncultured marine archaeon	0	1	3	1	0	4	0	2	0	1	1	0	1	0	0	0	0	0	1	0	0	1
OTU_813	Archaea	Thaumarchaeota	Marine Group I	uncultured marine archaeon	uncultured marine archaeon	uncultured marine archaeon	uncultured marine archaeon	0	0	2	4	5	2	0	0	0	0	13	0	2	3	0	2	1	0	0	0	0	2
OTU_814	Archaea	Woesearchaeota (DHVEG-6)	Unclassified	Unclassified	Unclassified	Unclassified	Unclassified	0	0	0	0	1	0	0	0	0	0	0	0	0	0	0	0	0	0	0	0	0	0
OTU_815	Archaea	Euryarchaeota	Thermoplasmata	Thermoplasmatales	Marine Group II	uncultured marine group II euryarchaeote HF500_30A08	uncultured marine group II euryarchaeote HF500_30A08	0	0	0	0	0	0	0	0	0	0	1	0	0	0	0	0	0	0	0	0	1	0
OTU_816	Archaea	Thaumarchaeota	Marine Group I	uncultured thaumarchaeote	uncultured thaumarchaeote	uncultured thaumarchaeote	uncultured thaumarchaeote	0	0	2	0	0	0	0	0	0	0	0	0	0	0	0	0	0	0	0	0	0	0
OTU_817	Archaea	Thaumarchaeota	Marine Group I	uncultured marine thaumarchaeote KM3_90_C11	uncultured marine thaumarchaeote KM3_90_C11	uncultured marine thaumarchaeote KM3_90_C11	uncultured marine thaumarchaeote KM3_90_C11	0	1	0	0	0	0	0	0	0	0	0	0	0	0	0	0	0	0	0	0	0	0
OTU_818	Archaea	Thaumarchaeota	Marine Group I	Unclassified	Unclassified	Unclassified	Unclassified	2	9	43	129	146	109	0	24	9	80	103	1	6	8	0	26	42	0	6	10	88	168
OTU_819	Archaea	Euryarchaeota	Thermoplasmata	Thermoplasmatales	Marine Group II	uncultured deep-sea archaeon	uncultured deep-sea archaeon	0	0	0	0	0	2	0	0	0	0	0	0	0	0	0	0	0	0	0	0	0	0
OTU_82	Archaea	Euryarchaeota	Thermoplasmata	Thermoplasmatales	Marine Group II	Unclassified	Unclassified	1	1	0	0	2	0	0	0	1	0	1	0	1	5	54	110	169	0	1	0	1	0
OTU_820	Archaea	Woesearchaeota (DHVEG-6)	uncultured euryarchaeote	uncultured euryarchaeote	uncultured euryarchaeote	uncultured euryarchaeote	uncultured euryarchaeote	0	0	0	0	0	1	0	0	0	0	0	0	0	0	0	0	0	0	0	0	0	0
OTU_821	Archaea	Euryarchaeota	Thermoplasmata	Thermoplasmatales	Marine Group III	uncultured marine group III euryarchaeote HF10_21C05	uncultured marine group III euryarchaeote HF10_21C05	0	0	0	0	0	0	1	0	0	0	0	1	0	0	0	0	0	0	0	0	0	0
OTU_822	Archaea	Thaumarchaeota	Marine Group I	Unclassified	Unclassified	Unclassified	Unclassified	0	0	0	0	0	0	0	0	0	0	0	0	4	0	0	0	0	0	10	0	0	0
OTU_823	Archaea	Thaumarchaeota	Marine Group I	Unclassified	Unclassified	Unclassified	Unclassified	0	0	0	0	0	0	0	0	1	1	0	0	0	0	0	0	0	0	0	0	0	0
OTU_824	Archaea	Thaumarchaeota	Marine Group I	uncultured marine archaeon	uncultured marine archaeon	uncultured marine archaeon	uncultured marine archaeon	1	4	2	2	1	2	0	2	1	4	0	0	4	3	0	0	0	0	3	0	3	1
OTU_825	Archaea	Thaumarchaeota	Marine Group I	uncultured marine group I thaumarchaeote	uncultured marine group I thaumarchaeote	uncultured marine group I thaumarchaeote	uncultured marine group I thaumarchaeote	0	0	0	0	0	0	0	0	1	1	0	0	1	0	0	0	0	0	5	0	0	0
OTU_826	Archaea	Thaumarchaeota	Unclassified	Unclassified	Unclassified	Unclassified	Unclassified	0	0	0	0	0	0	0	0	0	0	0	0	0	0	0	0	0	0	0	0	0	1
OTU_827	Archaea	Euryarchaeota	Thermoplasmata	Thermoplasmatales	Marine Group II	uncultured marine group II euryarchaeote HF500_30A08	uncultured marine group II euryarchaeote HF500_30A08	0	0	2	2	2	1	0	1	1	0	5	0	0	0	0	0	0	0	0	9	10	0
OTU_828	Archaea	Euryarchaeota	Thermoplasmata	Thermoplasmatales	Marine Group II	Unclassified	Unclassified	0	0	0	0	1	0	0	0	0	0	0	0	0	0	0	0	0	0	0	0	0	0
OTU_829	Archaea	Thaumarchaeota	Marine Benthic Group A	uncultured marine group I thaumarchaeote	uncultured marine group I thaumarchaeote	uncultured marine group I thaumarchaeote	uncultured marine group I thaumarchaeote	0	0	0	6	9	7	0	0	1	0	4	0	0	5	0	2	0	0	0	0	0	1
OTU_83	Archaea	Unclassified	Unclassified	Unclassified	Unclassified	Unclassified	Unclassified	0	0	0	0	0	0	0	0	0	16	0	0	0	0	0	0	0	0	2	0	2	17
OTU_830	Archaea	Woesearchaeota (DHVEG-6)	uncultured crenarchaeote	uncultured crenarchaeote	uncultured crenarchaeote	uncultured crenarchaeote	uncultured crenarchaeote	0	0	0	0	0	0	0	0	0	0	0	0	0	0	0	0	1	0	0	0	0	0
OTU_831	Archaea	Thaumarchaeota	Marine Group I	Unknown Order	Unknown Family	Candidatus Nitrosopelagicus	uncultured thaumarchaeote	0	0	0	0	0	0	0	0	14	0	0	0	0	0	0	0	0	0	0	0	0	0
OTU_832	Archaea	Thaumarchaeota	Marine Benthic Group A	uncultured marine group I thaumarchaeote	uncultured marine group I thaumarchaeote	uncultured marine group I thaumarchaeote	uncultured marine group I thaumarchaeote	0	0	1	20	24	7	0	0	2	1	60	0	2	16	0	14	2	0	0	0	19	79
OTU_833	Archaea	Thaumarchaeota	Unclassified	Unclassified	Unclassified	Unclassified	Unclassified	0	0	0	0	0	0	0	0	0	1	0	0	0	0	0	0	0	0	2	0	0	2
OTU_834	Archaea	Thaumarchaeota	Marine Benthic Group A	uncultured marine group I thaumarchaeote	uncultured marine group I thaumarchaeote	uncultured marine group I thaumarchaeote	uncultured marine group I thaumarchaeote	0	0	0	0	0	0	0	0	0	0	1	0	0	0	0	0	0	0	0	0	0	0
OTU_835	Archaea	Thaumarchaeota	Marine Group I	Unclassified	Unclassified	Unclassified	Unclassified	0	0	0	0	0	0	0	0	0	0	0	0	0	0	0	0	0	0	1	0	0	0
OTU_836	Archaea	Thaumarchaeota	Marine Group I	Unclassified	Unclassified	Unclassified	Unclassified	0	0	0	0	0	0	0	0	0	0	0	0	0	0	0	0	0	0	1	0	0	0
OTU_837	Archaea	Euryarchaeota	Thermoplasmata	Thermoplasmatales	Marine Group II	Unclassified	Unclassified	0	0	0	0	0	0	0	0	0	0	0	1	1	0	0	0	0	1	0	0	0	0
OTU_838	Archaea	Euryarchaeota	Thermoplasmata	Thermoplasmatales	Marine Group III	uncultured marine archaeon	uncultured marine archaeon	0	0	0	0	0	0	0	3	0	0	0	0	0	1	0	1	0	0	0	0	0	0
OTU_839	Archaea	Euryarchaeota	Thermoplasmata	Thermoplasmatales	Marine Group III	uncultured archaeon	uncultured archaeon	0	0	1	0	0	0	0	0	0	0	0	0	0	0	0	0	0	0	0	0	0	0
OTU_84	Archaea	Thaumarchaeota	Marine Group I	uncultured thaumarchaeote	uncultured thaumarchaeote	uncultured thaumarchaeote	uncultured thaumarchaeote	0	32	1	1	2	0	0	1	110	30	1	0	13	0	0	0	0	0	35	0	0	0
OTU_840	Archaea	Euryarchaeota	Thermoplasmata	Thermoplasmatales	Marine Group II	uncultured marine microorganism HF200_10-06-02	uncultured marine microorganism HF200_10-06-02	0	0	0	0	0	0	0	0	0	0	0	0	1	0	0	0	0	0	0	0	0	0
OTU_841	Archaea	Thaumarchaeota	Marine Group I	uncultured thaumarchaeote	uncultured thaumarchaeote	uncultured thaumarchaeote	uncultured thaumarchaeote	0	0	1	0	0	0	0	0	0	0	0	0	0	0	0	0	0	0	0	0	0	0
OTU_842	Archaea	Thaumarchaeota	Marine Group I	uncultured marine archaeon	uncultured marine archaeon	uncultured marine archaeon	uncultured marine archaeon	0	0	0	0	0	0	0	0	0	1	0	0	0	22	1	0	0	0	0	0	0	0
OTU_843	Archaea	Euryarchaeota	Thermoplasmata	Thermoplasmatales	Marine Group II	uncultured marine group II euryarchaeote HF500_30A08	uncultured marine group II euryarchaeote HF500_30A08	0	0	0	0	0	0	0	0	0	0	0	0	0	123	39	15	8	0	0	0	0	0
OTU_844	Archaea	Euryarchaeota	Thermoplasmata	Thermoplasmatales	Marine Group II	uncultured marine group II euryarchaeote HF10_20F02	uncultured marine group II euryarchaeote HF10_20F02	0	0	0	0	0	0	0	1	0	0	0	0	0	0	0	0	0	0	0	0	0	0
OTU_845	Archaea	Woesearchaeota (DHVEG-6)	uncultured euryarchaeote	uncultured euryarchaeote	uncultured euryarchaeote	uncultured euryarchaeote	uncultured euryarchaeote	0	0	0	0	0	0	0	0	0	0	0	0	0	0	1	0	0	0	0	0	0	0
OTU_846	Archaea	Thaumarchaeota	Marine Group I	Unclassified	Unclassified	Unclassified	Unclassified	0	0	0	0	0	0	0	0	0	0	0	0	0	1	5	2	3	0	0	0	0	0
OTU_847	Archaea	Euryarchaeota	Thermoplasmata	Thermoplasmatales	Marine Group II	Unclassified	Unclassified	0	0	0	0	0	0	0	1	0	0	0	0	0	0	0	0	0	0	0	0	0	0
OTU_848	Archaea	Thaumarchaeota	Marine Benthic Group A	uncultured marine crenarchaeote	uncultured marine crenarchaeote	uncultured marine crenarchaeote	uncultured marine crenarchaeote	0	0	0	0	0	0	0	0	1	0	0	0	0	0	0	0	0	0	0	0	0	0
OTU_849	Archaea	Thaumarchaeota	Marine Group I	Unclassified	Unclassified	Unclassified	Unclassified	0	0	0	0	0	0	0	0	0	0	0	0	0	9	42	9	4	0	0	0	0	0
OTU_85	Archaea	Euryarchaeota	Thermoplasmata	Thermoplasmatales	Marine Group II	uncultured marine group II euryarchaeote	uncultured marine group II euryarchaeote	2	0	1	0	0	83	5	55	0	0	0	10	1	0	0	0	0	0	0	0	0	0
OTU_850	Archaea	Thaumarchaeota	Marine Group I	Unknown Order	Unknown Family	Candidatus Nitrosopelagicus	marine metagenome	0	0	0	0	0	0	0	0	0	0	0	1	0	0	0	0	0	0	0	0	0	0
OTU_851	Archaea	Thaumarchaeota	Marine Group I	uncultured marine archaeon	uncultured marine archaeon	uncultured marine archaeon	uncultured marine archaeon	0	0	0	1	0	0	0	0	0	0	0	0	0	0	0	0	0	0	1	0	0	0
OTU_852	Archaea	Thaumarchaeota	Marine Group I	Unclassified	Unclassified	Unclassified	Unclassified	0	0	0	0	1	0	0	0	0	0	0	0	0	0	0	0	0	0	0	0	0	0
OTU_853	Archaea	Woesearchaeota (DHVEG-6)	uncultured euryarchaeote	uncultured euryarchaeote	uncultured euryarchaeote	uncultured euryarchaeote	uncultured euryarchaeote	0	0	0	0	0	2	0	0	0	0	0	0	0	0	0	0	0	0	0	0	0	0
OTU_854	Archaea	Euryarchaeota	Thermoplasmata	Thermoplasmatales	Marine Group II	uncultured marine group II euryarchaeote HF70_91G08	uncultured marine group II euryarchaeote HF70_91G08	0	0	0	0	0	0	1	0	0	0	0	0	0	0	0	0	0	0	0	0	0	0
OTU_855	Archaea	Woesearchaeota (DHVEG-6)	Unclassified	Unclassified	Unclassified	Unclassified	Unclassified	0	0	0	0	1	0	0	0	0	0	0	0	0	0	0	0	0	0	0	0	0	0
OTU_856	Archaea	Thaumarchaeota	Marine Group I	Unclassified	Unclassified	Unclassified	Unclassified	0	0	0	0	0	0	0	0	0	0	0	0	0	0	0	0	0	0	0	0	0	1
OTU_857	Archaea	Thaumarchaeota	Marine Group I	Unknown Order	Unknown Family	Candidatus Nitrosopelagicus	uncultured thaumarchaeote	1	0	0	0	0	0	12	0	0	0	0	9	0	0	0	0	0	1	0	0	0	0
OTU_858	Archaea	Thaumarchaeota	Marine Group I	Unknown Order	Unknown Family	Candidatus Nitrosopelagicus	marine metagenome	0	0	0	0	0	0	0	0	0	0	0	0	0	0	0	0	0	1	0	0	0	0
OTU_859	Archaea	Woesearchaeota (DHVEG-6)	Unclassified	Unclassified	Unclassified	Unclassified	Unclassified	0	0	0	0	0	0	0	0	0	0	0	0	0	0	0	0	0	0	0	0	1	0
OTU_86	Archaea	Euryarchaeota	Methanobacteria	Methanobacteriales	Methanobacteriaceae	Methanobrevibacter	uncultured methanogenic archaeon	0	0	0	2	0	0	0	0	0	0	392	0	0	0	0	2	0	0	0	0	0	0
OTU_860	Archaea	Euryarchaeota	Thermoplasmata	Thermoplasmatales	Marine Group II	Unclassified	Unclassified	1	0	0	0	0	0	0	0	0	0	0	0	0	0	0	0	0	0	0	0	0	0
OTU_861	Archaea	Euryarchaeota	Thermoplasmata	Thermoplasmatales	Marine Group II	uncultured marine group II euryarchaeote HF10_36B02	uncultured marine group II euryarchaeote HF10_36B02	2	0	0	0	0	0	0	0	0	0	0	0	0	0	0	0	0	0	0	0	0	0
OTU_862	Archaea	Euryarchaeota	Thermoplasmata	Thermoplasmatales	Marine Group II	uncultured marine microorganism HF200_10-06-02	uncultured marine microorganism HF200_10-06-02	0	0	0	0	0	0	0	0	2	0	0	0	0	0	0	0	0	0	1	0	0	0
OTU_863	Archaea	Thaumarchaeota	Unclassified	Unclassified	Unclassified	Unclassified	Unclassified	0	0	0	1	0	0	0	0	0	1	0	0	0	0	0	0	0	0	0	0	0	0
OTU_864	Archaea	Woesearchaeota (DHVEG-6)	uncultured euryarchaeote	uncultured euryarchaeote	uncultured euryarchaeote	uncultured euryarchaeote	uncultured euryarchaeote	0	1	0	0	0	0	0	0	0	0	0	0	0	0	0	0	0	0	0	0	0	0
OTU_865	Archaea	Euryarchaeota	Thermoplasmata	Thermoplasmatales	Marine Group II	uncultured deep-sea archaeon	uncultured deep-sea archaeon	0	0	0	0	0	0	0	0	0	0	0	0	0	0	0	0	0	0	0	1	0	0
OTU_866	Archaea	Euryarchaeota	Thermoplasmata	Thermoplasmatales	Marine Group II	Unclassified	Unclassified	0	1	1	0	0	0	2	0	0	0	1	0	2	0	0	0	0	0	0	0	0	0
OTU_867	Archaea	Thaumarchaeota	Marine Group I	uncultured sediment archaeon	uncultured sediment archaeon	uncultured sediment archaeon	uncultured sediment archaeon	0	0	0	0	0	0	0	0	0	0	0	0	0	0	0	0	0	0	0	0	0	2
OTU_868	Archaea	Euryarchaeota	Thermoplasmata	Thermoplasmatales	Marine Group III	uncultured marine group III euryarchaeote HF10_21C05	uncultured marine group III euryarchaeote HF10_21C05	370	0	0	0	2	2	221	0	0	0	0	149	8	2	0	0	10	0	0	58	0	0
OTU_869	Archaea	Euryarchaeota	Thermoplasmata	Thermoplasmatales	Marine Group III	uncultured marine archaeon	uncultured marine archaeon	0	0	0	0	0	0	0	0	0	0	0	0	0	7	8	1	0	0	0	0	0	0
OTU_87	Archaea	Euryarchaeota	Thermoplasmata	Thermoplasmatales	Marine Group II	uncultured marine group II euryarchaeote HF130_27A09	uncultured marine group II euryarchaeote HF130_27A09	128	52	16	3	0	3	19	89	0	0	0	49	41	22	0	0	0	0	2	58	0	0
OTU_870	Archaea	Thaumarchaeota	Marine Group I	Unknown Order	Unknown Family	Candidatus Nitrosopelagicus	uncultured archaeon	1	9	0	0	0	0	0	0	2	0	0	1	9	0	0	0	0	0	0	0	0	0
OTU_871	Archaea	Euryarchaeota	Thermoplasmata	Thermoplasmatales	Marine Group III	uncultured marine archaeon	uncultured marine archaeon	0	0	1	0	0	0	0	1	0	0	0	0	0	2	0	0	0	0	0	9	0	0
OTU_872	Archaea	Thaumarchaeota	Marine Group I	Unclassified	Unclassified	Unclassified	Unclassified	0	0	1	1	0	0	0	0	0	0	0	0	0	0	0	0	0	0	0	0	0	0
OTU_873	Archaea	Thaumarchaeota	Marine Group I	Unclassified	Unclassified	Unclassified	Unclassified	0	0	0	1	0	0	0	0	0	0	0	0	0	0	0	0	0	0	0	0	0	0
OTU_874	Archaea	Thaumarchaeota	Marine Group I	Unknown Order	Unknown Family	Candidatus Nitrosopelagicus	marine metagenome	0	0	0	0	0	0	0	0	0	0	0	0	0	0	0	0	0	1	0	0	0	0
OTU_875	Archaea	Euryarchaeota	Thermoplasmata	Thermoplasmatales	Marine Group II	uncultured deep-sea archaeon	uncultured deep-sea archaeon	0	0	0	0	0	0	0	0	0	0	0	0	0	0	0	0	0	0	0	0	2	0
OTU_876	Archaea	Euryarchaeota	Thermoplasmata	Thermoplasmatales	Marine Group III	uncultured marine archaeon	uncultured marine archaeon	0	0	1	8	6	9	0	17	0	0	0	0	0	10	1	9	11	0	0	4	0	0
OTU_877	Archaea	Woesearchaeota (DHVEG-6)	uncultured crenarchaeote	uncultured crenarchaeote	uncultured crenarchaeote	uncultured crenarchaeote	uncultured crenarchaeote	0	0	0	0	0	0	0	0	0	0	0	0	0	0	0	3	0	0	0	0	0	0
OTU_878	Unclassified	Unclassified	Unclassified	Unclassified	Unclassified	Unclassified	Unclassified	0	0	0	0	0	0	0	0	0	0	0	1	0	0	0	0	0	0	0	0	0	0
OTU_879	Archaea	Thaumarchaeota	Marine Group I	Unclassified	Unclassified	Unclassified	Unclassified	0	0	0	0	0	0	0	0	1	0	0	0	0	0	0	0	0	0	1	0	0	0
OTU_88	Archaea	Woesearchaeota (DHVEG-6)	uncultured euryarchaeote	uncultured euryarchaeote	uncultured euryarchaeote	uncultured euryarchaeote	uncultured euryarchaeote	0	0	0	0	19	1	0	3	0	0	0	0	0	0	0	0	3	0	1	1	0	0
OTU_880	Archaea	Thaumarchaeota	pSL12	uncultured marine crenarchaeote AD1000-23-H12	uncultured marine crenarchaeote AD1000-23-H12	uncultured marine crenarchaeote AD1000-23-H12	uncultured marine crenarchaeote AD1000-23-H12	0	0	0	0	0	0	0	0	0	0	0	0	0	0	3	0	0	0	0	0	0	0
OTU_881	Archaea	Woesearchaeota (DHVEG-6)	uncultured euryarchaeote	uncultured euryarchaeote	uncultured euryarchaeote	uncultured euryarchaeote	uncultured euryarchaeote	0	0	0	0	0	0	0	0	0	0	0	0	0	3	1	0	0	0	0	0	0	0
OTU_882	Archaea	Euryarchaeota	Thermoplasmata	Thermoplasmatales	Marine Group II	uncultured marine group II euryarchaeote HF200_89A11	uncultured marine group II euryarchaeote HF200_89A11	1	0	0	0	0	0	0	0	0	0	0	1	0	0	0	0	0	0	0	0	0	0
OTU_883	Archaea	Euryarchaeota	Thermoplasmata	Thermoplasmatales	Marine Group II	Unclassified	Unclassified	0	0	0	0	0	0	0	0	0	0	0	1	0	0	0	0	0	0	0	0	0	0
OTU_884	Archaea	Thaumarchaeota	Marine Group I	Unclassified	Unclassified	Unclassified	Unclassified	0	0	0	0	1	2	0	0	0	1	0	0	0	0	0	0	0	0	0	0	2	2
OTU_885	Archaea	Euryarchaeota	Thermoplasmata	Thermoplasmatales	Marine Group II	uncultured marine group II euryarchaeote HF200_89A11	uncultured marine group II euryarchaeote HF200_89A11	1	0	0	0	0	0	0	0	0	0	0	3	0	0	0	0	0	0	0	0	0	0
OTU_886	Archaea	Euryarchaeota	Thermoplasmata	Thermoplasmatales	Marine Group II	uncultured marine group II euryarchaeote HF70_91G08	uncultured marine group II euryarchaeote HF70_91G08	1	0	0	0	0	0	0	0	0	0	0	0	0	0	0	0	0	0	0	0	0	0
OTU_887	Archaea	Thaumarchaeota	Marine Group I	Unclassified	Unclassified	Unclassified	Unclassified	0	0	0	0	0	0	0	0	0	0	0	0	0	0	0	0	0	0	0	0	0	1
OTU_888	Archaea	Thaumarchaeota	Marine Group I	uncultured marine archaeon	uncultured marine archaeon	uncultured marine archaeon	uncultured marine archaeon	0	0	0	0	0	0	0	0	10	0	0	0	0	0	0	0	0	0	0	0	0	0
OTU_889	Archaea	Euryarchaeota	Thermoplasmata	Thermoplasmatales	Marine Group III	uncultured marine archaeon	uncultured marine archaeon	0	0	0	0	0	0	0	0	0	0	0	0	1	0	0	0	0	0	0	0	0	0
OTU_89	Archaea	Euryarchaeota	Thermoplasmata	Thermoplasmatales	Marine Group III	uncultured marine archaeon	uncultured marine archaeon	0	0	1	8	28	12	0	10	0	0	0	0	0	28	69	77	137	0	0	0	0	0
OTU_890	Archaea	Euryarchaeota	Halobacteria	Halobacteriales	Halobacteriaceae	Candidatus Halobonum	uncultured archaeon	0	0	0	0	0	0	0	0	0	0	0	0	1	0	0	0	0	0	1	0	0	0
OTU_891	Archaea	Euryarchaeota	Thermoplasmata	Thermoplasmatales	Marine Group II	uncultured marine group II euryarchaeote HF200_89A11	uncultured marine group II euryarchaeote HF200_89A11	1	0	0	0	0	0	0	0	0	0	0	0	0	0	0	0	0	0	0	0	0	0
OTU_892	Archaea	Euryarchaeota	Thermoplasmata	Thermoplasmatales	Marine Group III	uncultured marine archaeon	uncultured marine archaeon	0	0	0	0	0	0	0	1	0	0	0	0	0	0	0	0	0	0	0	0	0	0
OTU_893	Archaea	Thaumarchaeota	Marine Group I	Unclassified	Unclassified	Unclassified	Unclassified	0	0	0	0	0	0	0	0	0	0	0	0	0	1	1	0	0	0	0	0	0	0
OTU_894	Archaea	Thaumarchaeota	Marine Group I	Unknown Order	Unknown Family	Candidatus Nitrosopelagicus	marine metagenome	9	1	0	0	0	0	10	0	0	0	1	19	0	0	0	0	0	1	1	0	0	0
OTU_895	Archaea	Euryarchaeota	Thermoplasmata	Thermoplasmatales	Marine Group II	uncultured marine group II euryarchaeote HF200_89A11	uncultured marine group II euryarchaeote HF200_89A11	2	0	0	0	0	0	0	0	0	0	0	1	0	0	0	0	0	0	0	0	0	0
OTU_896	Archaea	Thaumarchaeota	Marine Group I	Unknown Order	Unknown Family	Candidatus Nitrosopelagicus	uncultured archaeon	0	0	0	0	0	0	0	0	1	1	0	0	2	0	0	0	0	0	6	0	0	0
OTU_897	Bacteria	Proteobacteria	Unclassified	Unclassified	Unclassified	Unclassified	Unclassified	0	0	0	0	0	0	0	1	0	0	0	0	0	0	0	0	0	0	0	0	0	0
OTU_898	Unclassified	Unclassified	Unclassified	Unclassified	Unclassified	Unclassified	Unclassified	0	0	0	0	0	0	0	0	0	0	0	0	0	0	0	0	0	0	0	0	0	1
OTU_899	Archaea	Woesearchaeota (DHVEG-6)	uncultured bacterium	uncultured bacterium	uncultured bacterium	uncultured bacterium	uncultured bacterium	0	0	0	0	0	0	0	2	0	0	0	0	0	0	1	0	0	0	0	1	0	0
OTU_9	Archaea	Euryarchaeota	Thermoplasmata	Thermoplasmatales	Marine Group III	uncultured marine archaeon	uncultured marine archaeon	8	76	155	41	85	110	24	804	0	0	0	16	85	120	7	41	32	0	2	191	0	0
OTU_90	Archaea	Woesearchaeota (DHVEG-6)	uncultured euryarchaeote	uncultured euryarchaeote	uncultured euryarchaeote	uncultured euryarchaeote	uncultured euryarchaeote	0	4	5	23	15	4	0	16	0	0	0	0	0	3	3	3	9	0	0	63	0	0
OTU_900	Archaea	Thaumarchaeota	Marine Group I	Unclassified	Unclassified	Unclassified	Unclassified	0	0	0	0	0	0	0	0	0	0	0	0	0	0	0	3	0	0	0	0	0	0
OTU_901	Archaea	Thaumarchaeota	Marine Group I	uncultured thaumarchaeote	uncultured thaumarchaeote	uncultured thaumarchaeote	uncultured thaumarchaeote	0	0	1	2	1	1	0	0	0	0	0	0	0	4	2	0	0	0	0	0	0	0
OTU_902	Archaea	Euryarchaeota	Thermoplasmata	Thermoplasmatales	Marine Group II	uncultured marine group II euryarchaeote HF130_27A09	uncultured marine group II euryarchaeote HF130_27A09	107	0	0	0	0	0	41	0	0	0	0	38	0	0	0	0	1	0	0	0	0	0
OTU_903	Archaea	Woesearchaeota (DHVEG-6)	uncultured crenarchaeote	uncultured crenarchaeote	uncultured crenarchaeote	uncultured crenarchaeote	uncultured crenarchaeote	0	0	0	0	0	0	0	0	0	0	0	0	0	0	0	1	0	0	0	0	0	0
OTU_904	Archaea	Woesearchaeota (DHVEG-6)	uncultured euryarchaeote	uncultured euryarchaeote	uncultured euryarchaeote	uncultured euryarchaeote	uncultured euryarchaeote	0	0	0	0	0	0	0	0	0	0	0	0	0	0	0	0	0	1	0	0	0	0
OTU_905	Archaea	Euryarchaeota	Methanomicrobia	Methanosarcinales	Methanosaetaceae	Methanosaeta	Unclassified	0	0	0	0	0	0	0	0	0	0	0	0	0	0	0	0	0	2	0	0	0	0
OTU_906	Bacteria	Cyanobacteria	Cyanobacteria	SubsectionI	FamilyI	Prochlorococcus	uncultured cyanobacterium	0	0	0	0	0	0	1	0	0	0	0	0	0	0	0	0	0	0	0	0	0	0
OTU_907	Archaea	Euryarchaeota	Thermoplasmata	Thermoplasmatales	Marine Group II	uncultured marine group II euryarchaeote HF130_27A09	uncultured marine group II euryarchaeote HF130_27A09	0	0	0	0	0	0	0	1	0	0	0	0	0	0	0	0	0	0	0	0	0	0
OTU_908	Archaea	Euryarchaeota	Thermoplasmata	Thermoplasmatales	Marine Group II	uncultured marine group II euryarchaeote HF200_89A11	uncultured marine group II euryarchaeote HF200_89A11	6	0	0	0	0	1	0	1	0	0	0	11	0	0	0	0	0	0	0	0	0	0
OTU_909	Bacteria	Unclassified	Unclassified	Unclassified	Unclassified	Unclassified	Unclassified	0	0	0	0	0	0	0	0	0	0	3	0	0	0	0	0	0	0	0	0	1	1
OTU_91	Archaea	Euryarchaeota	Thermoplasmata	Thermoplasmatales	Marine Group II	uncultured marine archaeon	uncultured marine archaeon	0	0	0	0	0	18	0	0	0	0	0	0	0	0	0	0	5	0	0	0	0	0
OTU_910	Archaea	Euryarchaeota	Thermoplasmata	Thermoplasmatales	Marine Group II	uncultured marine microorganism HF200_10-06-02	uncultured marine microorganism HF200_10-06-02	0	0	0	0	0	0	0	0	0	0	0	0	0	0	0	0	0	0	1	0	0	0
OTU_911	Archaea	Thaumarchaeota	Marine Group I	uncultured marine archaeon	uncultured marine archaeon	uncultured marine archaeon	uncultured marine archaeon	0	4	3	2	2	0	0	0	10	5	3	0	7	1	0	0	0	0	12	0	2	1
OTU_912	Archaea	Unclassified	Unclassified	Unclassified	Unclassified	Unclassified	Unclassified	0	0	0	0	0	0	0	0	0	0	0	0	0	0	0	0	0	0	0	2	0	0
OTU_913	Archaea	Euryarchaeota	Thermoplasmata	Thermoplasmatales	Marine Group III	uncultured marine archaeon	uncultured marine archaeon	0	0	10	0	0	0	0	11	0	0	0	0	0	6	0	0	0	0	2	88	0	0
OTU_914	Archaea	Thaumarchaeota	Marine Group I	Unclassified	Unclassified	Unclassified	Unclassified	0	0	0	0	0	0	0	0	11	21	0	0	4	0	0	0	0	0	10	0	0	0
OTU_915	Archaea	Euryarchaeota	Methanomicrobia	Methanosarcinales	Methanosaetaceae	Methanosaeta	uncultured methanogenic archaeon	0	0	0	0	0	0	0	0	0	0	20	0	0	0	0	0	0	49	0	0	0	0
OTU_916	Archaea	Euryarchaeota	Thermoplasmata	Thermoplasmatales	Marine Group II	uncultured marine group II euryarchaeote HF70_91G08	uncultured marine group II euryarchaeote HF70_91G08	0	0	0	0	0	0	0	0	0	0	1	0	0	0	0	0	0	0	0	0	0	0
OTU_917	Archaea	Euryarchaeota	Thermoplasmata	Thermoplasmatales	Marine Group II	Unclassified	Unclassified	0	0	0	0	0	0	0	0	0	0	3	0	0	0	0	0	0	0	0	0	0	0
OTU_918	Archaea	Woesearchaeota (DHVEG-6)	Unclassified	Unclassified	Unclassified	Unclassified	Unclassified	0	0	0	0	0	0	0	0	0	0	0	0	0	0	0	0	0	0	1	0	0	0
OTU_919	Archaea	Thaumarchaeota	Marine Group I	Unclassified	Unclassified	Unclassified	Unclassified	0	2	0	0	0	0	0	0	0	1	0	0	0	0	0	1	0	0	0	0	0	0
OTU_92	Archaea	Euryarchaeota	Thermoplasmata	Thermoplasmatales	Marine Group III	uncultured marine archaeon	uncultured marine archaeon	0	0	0	1	0	0	0	4	0	0	0	0	0	74	59	36	20	0	0	1	0	0
OTU_920	Archaea	Euryarchaeota	Thermoplasmata	Thermoplasmatales	Marine Group II	uncultured marine group II euryarchaeote HF70_91G08	uncultured marine group II euryarchaeote HF70_91G08	0	0	0	0	0	0	0	0	0	0	0	0	0	0	0	0	1	0	0	0	0	0
OTU_921	Bacteria	Unclassified	Unclassified	Unclassified	Unclassified	Unclassified	Unclassified	0	0	0	0	0	0	1	0	0	0	0	0	0	0	0	0	0	0	0	0	0	0
OTU_922	Archaea	Thaumarchaeota	Marine Group I	Unclassified	Unclassified	Unclassified	Unclassified	0	0	1	0	0	1	0	0	0	0	0	0	0	1	0	1	0	0	0	0	0	2
OTU_923	Archaea	Thaumarchaeota	Marine Group I	Unknown Order	Unknown Family	Candidatus Nitrosopelagicus	Unclassified	0	8	0	0	0	0	0	0	3	2	0	0	1	0	0	0	0	0	3	0	0	0
OTU_924	Archaea	Thaumarchaeota	Marine Group I	Unknown Order	Unknown Family	Candidatus Nitrosopelagicus	uncultured thaumarchaeote	21	8	0	0	2	4	33	0	16	25	2	170	2	0	0	0	0	88	4	0	0	0
OTU_925	Archaea	Thaumarchaeota	Marine Group I	Unknown Order	Unknown Family	Candidatus Nitrosopumilus	Unclassified	0	0	0	0	0	0	0	0	0	0	0	0	0	0	0	0	1	0	0	0	0	0
OTU_926	Bacteria	Unclassified	Unclassified	Unclassified	Unclassified	Unclassified	Unclassified	0	0	0	0	0	0	0	0	0	0	0	0	0	0	0	0	0	0	0	0	0	3
OTU_927	Archaea	Unclassified	Unclassified	Unclassified	Unclassified	Unclassified	Unclassified	0	0	0	0	0	0	0	0	0	0	0	0	0	0	0	0	0	0	0	0	0	1
OTU_928	Archaea	Thaumarchaeota	Marine Group I	Unclassified	Unclassified	Unclassified	Unclassified	0	0	0	0	0	0	0	0	0	0	0	0	0	0	0	0	0	0	2	0	0	0
OTU_929	Archaea	Thaumarchaeota	Marine Group I	Unclassified	Unclassified	Unclassified	Unclassified	0	0	0	0	0	0	0	0	0	0	0	0	0	0	0	0	0	0	0	0	0	1
OTU_93	Archaea	Euryarchaeota	Thermoplasmata	Thermoplasmatales	Marine Group II	uncultured marine group II euryarchaeote HF130_40G09	uncultured marine group II euryarchaeote HF130_40G09	0	0	0	0	0	0	0	0	0	0	0	14	1	0	1	2	0	0	0	0	0	0
OTU_930	Archaea	Thaumarchaeota	Marine Group I	uncultured marine archaeon	uncultured marine archaeon	uncultured marine archaeon	uncultured marine archaeon	0	0	0	0	0	0	0	0	0	2	0	0	0	0	0	0	0	0	0	0	0	0
OTU_931	Archaea	Thaumarchaeota	Marine Group I	Unclassified	Unclassified	Unclassified	Unclassified	5	77	177	183	122	76	0	88	46	63	32	1	102	73	0	48	33	0	46	4	11	9
OTU_932	Archaea	Thaumarchaeota	Marine Group I	uncultured marine archaeon	uncultured marine archaeon	uncultured marine archaeon	uncultured marine archaeon	0	0	1	0	0	0	0	0	6	2	0	0	1	0	0	0	0	0	3	0	1	1
OTU_933	Archaea	Thaumarchaeota	Marine Group I	uncultured thaumarchaeote	uncultured thaumarchaeote	uncultured thaumarchaeote	uncultured thaumarchaeote	0	0	0	0	0	0	0	0	0	1	0	0	0	0	0	0	0	0	0	0	0	0
OTU_934	Archaea	Thaumarchaeota	Marine Group I	uncultured marine archaeon	uncultured marine archaeon	uncultured marine archaeon	uncultured marine archaeon	0	0	2	2	0	0	0	1	0	0	10	0	0	2	0	0	0	0	1	0	0	0
OTU_935	Archaea	Thaumarchaeota	Marine Group I	Unknown Order	Unknown Family	Unclassified	Unclassified	0	0	0	0	0	0	0	0	0	0	0	0	0	0	0	0	0	0	1	0	0	0
OTU_936	Archaea	Thaumarchaeota	Marine Group I	Unknown Order	Unknown Family	Candidatus Nitrosopelagicus	marine metagenome	0	0	0	0	0	0	0	0	0	1	0	0	0	0	0	0	0	4	0	0	0	0
OTU_937	Archaea	Thaumarchaeota	Marine Group I	Unknown Order	Unknown Family	Unclassified	Unclassified	0	15	0	0	0	0	0	0	118	13	0	0	19	0	0	0	0	0	60	0	1	20
OTU_938	Archaea	Euryarchaeota	Thermoplasmata	Thermoplasmatales	Marine Group II	uncultured marine group II euryarchaeote HF500_30A08	uncultured marine group II euryarchaeote HF500_30A08	0	0	2	0	0	0	0	0	0	1	0	0	0	0	0	0	0	0	2	15	17	0
OTU_939	Archaea	Euryarchaeota	Thermoplasmata	Thermoplasmatales	Marine Group III	uncultured marine group III euryarchaeote HF10_21C05	uncultured marine group III euryarchaeote HF10_21C05	1	0	0	0	0	0	0	0	0	0	0	0	0	0	0	0	0	0	0	0	0	0
OTU_94	Archaea	Woesearchaeota (DHVEG-6)	uncultured euryarchaeote	uncultured euryarchaeote	uncultured euryarchaeote	uncultured euryarchaeote	uncultured euryarchaeote	0	0	0	0	0	0	5	0	0	0	0	6	0	0	0	0	0	0	0	0	0	0
OTU_940	Archaea	Woesearchaeota (DHVEG-6)	uncultured archaeon	uncultured archaeon	uncultured archaeon	uncultured archaeon	uncultured archaeon	0	0	0	0	0	0	0	0	0	0	0	0	0	0	0	0	1	0	0	0	0	0
OTU_941	Archaea	Euryarchaeota	Thermoplasmata	Thermoplasmatales	Marine Group III	uncultured marine group III euryarchaeote HF130_95B02	uncultured marine group III euryarchaeote HF130_95B02	30	0	0	0	0	0	0	0	0	0	0	6	0	0	0	0	0	0	0	0	0	0
OTU_942	Archaea	Thaumarchaeota	Marine Group I	uncultured marine group I thaumarchaeote	uncultured marine group I thaumarchaeote	uncultured marine group I thaumarchaeote	uncultured marine group I thaumarchaeote	0	0	0	0	0	0	0	1	0	0	1	0	0	0	0	0	0	0	0	0	0	2
OTU_943	Archaea	Thaumarchaeota	Marine Group I	Unclassified	Unclassified	Unclassified	Unclassified	0	0	0	0	0	0	0	0	0	0	0	0	0	0	0	0	0	0	0	1	0	0
OTU_944	Archaea	Euryarchaeota	Thermoplasmata	Thermoplasmatales	Marine Group III	uncultured marine archaeon	uncultured marine archaeon	0	0	0	0	0	0	0	0	0	0	0	0	0	0	0	0	0	0	0	1	0	0
OTU_945	Archaea	Woesearchaeota (DHVEG-6)	uncultured euryarchaeote	uncultured euryarchaeote	uncultured euryarchaeote	uncultured euryarchaeote	uncultured euryarchaeote	0	0	0	0	0	1	0	0	0	0	0	0	0	0	0	0	0	0	0	0	0	0
OTU_946	Archaea	Euryarchaeota	Thermoplasmata	Thermoplasmatales	Marine Group II	uncultured marine group II euryarchaeote HF500_30A08	uncultured marine group II euryarchaeote HF500_30A08	0	2	10	5	3	5	0	4	1	2	48	0	3	3	0	0	0	0	0	9	14	0
OTU_947	Archaea	Thaumarchaeota	Marine Group I	Unclassified	Unclassified	Unclassified	Unclassified	0	0	0	0	2	2	0	0	0	0	0	0	0	0	0	0	0	0	0	0	0	0
OTU_948	Archaea	Euryarchaeota	Thermoplasmata	Thermoplasmatales	Marine Group II	uncultured marine microorganism HF200_10-06-02	uncultured marine microorganism HF200_10-06-02	0	0	0	2	0	6	0	0	1	2	11	2	0	1	0	0	0	0	0	2	5	0
OTU_949	Archaea	Euryarchaeota	Thermoplasmata	Thermoplasmatales	Marine Group II	Unclassified	Unclassified	13	2	0	0	0	0	44	1	0	0	0	6	1	0	0	0	0	0	0	0	0	0
OTU_95	Archaea	Euryarchaeota	Thermoplasmata	Thermoplasmatales	Marine Group II	uncultured archaeon	uncultured archaeon	3	5	0	0	0	0	0	0	0	0	0	1	13	0	0	0	0	0	0	0	0	0
OTU_950	Archaea	Euryarchaeota	Thermoplasmata	Thermoplasmatales	Marine Group II	uncultured marine group II euryarchaeote	uncultured marine group II euryarchaeote	0	0	0	0	0	0	0	0	0	0	0	1	0	0	0	0	0	0	0	0	0	0
OTU_951	Archaea	Euryarchaeota	Thermoplasmata	Thermoplasmatales	Marine Group II	uncultured marine group II euryarchaeote HF200_89A11	uncultured marine group II euryarchaeote HF200_89A11	4	0	0	0	0	0	2	0	0	0	0	3	0	0	0	0	0	0	0	0	0	0
OTU_952	Archaea	Thaumarchaeota	Marine Group I	uncultured marine group I thaumarchaeote	uncultured marine group I thaumarchaeote	uncultured marine group I thaumarchaeote	uncultured marine group I thaumarchaeote	0	0	0	0	0	0	0	2	0	0	0	0	0	0	0	0	0	0	0	0	0	0
OTU_953	Archaea	Euryarchaeota	Thermoplasmata	Thermoplasmatales	Marine Group III	uncultured marine archaeon	uncultured marine archaeon	0	0	0	0	0	1	0	1	0	0	0	0	0	0	0	0	0	0	0	0	0	0
OTU_954	Archaea	Thaumarchaeota	Marine Group I	uncultured marine archaeon	uncultured marine archaeon	uncultured marine archaeon	uncultured marine archaeon	0	0	0	0	0	1	0	0	0	1	1	1	0	0	1	0	0	0	0	0	1	0
OTU_955	Archaea	Euryarchaeota	Thermoplasmata	Thermoplasmatales	Marine Group III	uncultured archaeon	uncultured archaeon	0	0	1	0	0	0	0	1	0	0	0	0	0	0	0	0	0	0	0	0	0	0
OTU_956	Archaea	Thaumarchaeota	AK59	uncultured marine group I thaumarchaeote	uncultured marine group I thaumarchaeote	uncultured marine group I thaumarchaeote	uncultured marine group I thaumarchaeote	0	0	0	0	0	0	0	0	0	0	0	0	0	2	1	1	1	0	0	0	0	0
OTU_957	Archaea	Thaumarchaeota	Marine Group I	uncultured archaeon	uncultured archaeon	uncultured archaeon	uncultured archaeon	0	0	0	0	1	0	0	0	0	0	0	0	0	0	0	0	0	0	0	0	0	0
OTU_958	Archaea	Thaumarchaeota	Marine Group I	Unclassified	Unclassified	Unclassified	Unclassified	0	0	0	0	0	0	0	0	0	0	0	0	0	0	0	0	0	0	3	0	0	0
OTU_959	Archaea	Thaumarchaeota	Marine Group I	Unknown Order	Unknown Family	Candidatus Nitrosopelagicus	marine metagenome	0	0	0	0	0	0	0	0	0	0	0	1	0	0	0	0	0	0	0	0	0	0
OTU_96	Archaea	Thaumarchaeota	Soil Crenarchaeotic Group(SCG)	uncultured archaeon	uncultured archaeon	uncultured archaeon	uncultured archaeon	0	0	0	0	0	0	0	0	0	85	0	0	0	0	0	0	0	0	0	0	0	0
OTU_960	Archaea	Euryarchaeota	Thermoplasmata	Thermoplasmatales	Marine Group III	uncultured marine archaeon	uncultured marine archaeon	2	87	9	0	0	0	0	80	0	0	0	6	91	1	0	0	0	0	0	0	0	0
OTU_961	Archaea	Thaumarchaeota	Marine Group I	Unclassified	Unclassified	Unclassified	Unclassified	0	1	3	0	0	0	0	1	0	2	0	1	0	1	0	0	0	0	0	0	0	0
OTU_962	Archaea	Euryarchaeota	Thermoplasmata	Thermoplasmatales	Marine Group II	uncultured marine group II euryarchaeote HF70_91G08	uncultured marine group II euryarchaeote HF70_91G08	0	0	0	0	0	0	0	0	0	0	0	2	0	0	0	0	0	0	0	0	0	0
OTU_963	Archaea	Thaumarchaeota	Marine Group I	Unclassified	Unclassified	Unclassified	Unclassified	0	0	0	0	0	0	0	1	0	0	0	0	0	0	0	0	0	0	0	0	0	0
OTU_964	Archaea	Thaumarchaeota	Marine Group I	uncultured marine archaeon	uncultured marine archaeon	uncultured marine archaeon	uncultured marine archaeon	0	0	0	0	2	0	0	1	0	0	0	0	1	0	0	0	1	0	0	0	0	0
OTU_965	Archaea	Euryarchaeota	Thermoplasmata	Thermoplasmatales	Marine Group II	uncultured marine group II euryarchaeote HF500_30A08	uncultured marine group II euryarchaeote HF500_30A08	0	0	1	0	1	3	0	0	0	0	1	0	0	0	0	0	0	0	1	0	2	0
OTU_966	Archaea	Thaumarchaeota	Marine Group I	Unclassified	Unclassified	Unclassified	Unclassified	0	1	0	0	0	0	0	0	0	0	0	0	0	0	0	0	0	0	1	0	0	0
OTU_967	Archaea	Woesearchaeota (DHVEG-6)	uncultured euryarchaeote	uncultured euryarchaeote	uncultured euryarchaeote	uncultured euryarchaeote	uncultured euryarchaeote	0	0	0	0	0	0	0	2	0	0	0	0	0	0	0	0	0	0	0	0	0	0
OTU_968	Archaea	Woesearchaeota (DHVEG-6)	uncultured euryarchaeote	uncultured euryarchaeote	uncultured euryarchaeote	uncultured euryarchaeote	uncultured euryarchaeote	0	0	0	0	2	0	0	0	0	0	0	0	0	0	0	0	0	0	0	0	0	0
OTU_969	Archaea	Euryarchaeota	Thermoplasmata	Thermoplasmatales	Marine Group II	uncultured marine group II euryarchaeote HF70_91G08	uncultured marine group II euryarchaeote HF70_91G08	0	0	0	0	0	1	0	0	0	0	0	0	0	0	0	0	1	0	0	0	0	0
OTU_97	Bacteria	Unclassified	Unclassified	Unclassified	Unclassified	Unclassified	Unclassified	0	0	0	0	0	0	0	0	0	18	0	0	0	0	0	0	0	0	0	0	0	0
OTU_970	Archaea	Woesearchaeota (DHVEG-6)	uncultured archaeon	uncultured archaeon	uncultured archaeon	uncultured archaeon	uncultured archaeon	0	0	0	1	5	0	0	0	0	0	0	0	0	0	0	0	0	0	0	0	0	0
OTU_971	Archaea	Thaumarchaeota	Marine Group I	Unknown Order	Unknown Family	Candidatus Nitrosopelagicus	unidentified archaeon PM7	0	1	0	0	0	0	0	0	3	0	0	0	0	0	0	0	0	0	1	0	0	0
OTU_972	Archaea	Euryarchaeota	Thermoplasmata	Thermoplasmatales	Marine Group III	uncultured marine archaeon	uncultured marine archaeon	0	0	1	0	0	0	0	0	0	0	0	0	0	0	0	0	0	0	0	0	0	0
OTU_973	Archaea	Euryarchaeota	Thermoplasmata	Thermoplasmatales	Marine Group III	uncultured marine archaeon	uncultured marine archaeon	0	0	0	0	1	0	0	0	0	0	0	0	0	1	0	1	0	0	0	0	0	0
OTU_974	Archaea	Euryarchaeota	Thermoplasmata	Thermoplasmatales	Marine Group II	uncultured marine group II euryarchaeote HF500_30A08	uncultured marine group II euryarchaeote HF500_30A08	0	0	0	0	0	0	0	0	0	0	0	0	0	18	0	0	0	0	0	0	0	0
OTU_975	Archaea	Thaumarchaeota	Marine Benthic Group A	uncultured marine crenarchaeote	uncultured marine crenarchaeote	uncultured marine crenarchaeote	uncultured marine crenarchaeote	0	0	0	0	0	0	0	0	5	0	0	0	2	5	0	0	7	0	0	0	0	0
OTU_976	Archaea	Euryarchaeota	Thermoplasmata	Thermoplasmatales	Marine Group II	Unclassified	Unclassified	1	0	0	0	0	0	0	0	0	0	0	1	0	0	0	0	0	0	0	0	0	0
OTU_977	Archaea	Euryarchaeota	Thermoplasmata	Thermoplasmatales	Marine Group II	uncultured marine group II euryarchaeote HF500_30A08	uncultured marine group II euryarchaeote HF500_30A08	0	0	0	0	0	0	0	0	0	0	2	0	0	0	0	0	0	0	0	0	0	0
OTU_978	Archaea	Thaumarchaeota	Marine Group I	Unclassified	Unclassified	Unclassified	Unclassified	0	0	0	0	0	0	0	0	0	1	0	0	0	0	0	0	0	0	0	0	0	0
OTU_979	Archaea	Euryarchaeota	Thermoplasmata	Thermoplasmatales	Marine Group II	marine metagenome	marine metagenome	2105	131	35	2	25	37	1076	217	0	2	82	2139	186	23	0	3	2	393	0	6	1	0
OTU_98	Archaea	Thaumarchaeota	Marine Group I	Unclassified	Unclassified	Unclassified	Unclassified	0	3	9	0	0	3	0	7	1	0	0	0	1	50	151	46	28	0	0	0	0	0
OTU_980	Archaea	Euryarchaeota	Methanomicrobia	Methanosarcinales	Methanosaetaceae	Methanosaeta	Unclassified	0	0	0	0	0	0	0	0	0	0	0	0	0	0	0	0	0	2	0	0	0	0
OTU_981	Archaea	Thaumarchaeota	Marine Group I	Unclassified	Unclassified	Unclassified	Unclassified	0	0	0	0	0	0	0	0	0	0	0	0	0	0	0	0	0	0	0	0	1	0
OTU_982	Archaea	Euryarchaeota	Thermoplasmata	Thermoplasmatales	Marine Group II	uncultured marine group II euryarchaeote HF10_20F02	uncultured marine group II euryarchaeote HF10_20F02	1	0	0	0	0	0	0	0	0	0	0	0	0	0	0	0	0	0	0	0	0	0
OTU_983	Archaea	Euryarchaeota	Thermoplasmata	Thermoplasmatales	Marine Group III	uncultured marine group III euryarchaeote HF130_95B02	uncultured marine group III euryarchaeote HF130_95B02	68	4	3	0	0	0	22	2	0	0	0	11	3	1	0	0	0	0	0	7	0	0
OTU_984	Archaea	Thaumarchaeota	Marine Group I	Unclassified	Unclassified	Unclassified	Unclassified	0	0	0	0	0	1	0	0	0	1	1	0	0	0	0	0	0	0	0	0	0	2
OTU_985	Archaea	Euryarchaeota	Thermoplasmata	Thermoplasmatales	Marine Group II	uncultured marine group II euryarchaeote HF500_30A08	uncultured marine group II euryarchaeote HF500_30A08	0	0	0	0	0	0	0	0	0	0	4	0	0	0	0	0	0	0	0	0	0	0
OTU_986	Archaea	Thaumarchaeota	Marine Group I	Unclassified	Unclassified	Unclassified	Unclassified	0	1	0	0	0	0	0	0	0	0	0	0	0	0	0	0	0	0	0	0	0	0
OTU_987	Archaea	Thaumarchaeota	Marine Group I	Unclassified	Unclassified	Unclassified	Unclassified	0	0	0	1	0	0	0	0	0	0	0	0	0	0	0	0	0	0	0	0	0	0
OTU_988	Archaea	Euryarchaeota	Thermoplasmata	Thermoplasmatales	Marine Group III	uncultured archaeon	uncultured archaeon	0	0	8	17	8	12	0	1	0	0	0	0	0	9	3	0	7	0	0	4	0	0
OTU_989	Archaea	Thaumarchaeota	Marine Group I	Unclassified	Unclassified	Unclassified	Unclassified	0	0	0	0	0	0	0	0	0	1	0	0	0	0	0	0	0	0	0	0	0	0
OTU_99	Archaea	Euryarchaeota	Thermoplasmata	Thermoplasmatales	Marine Group II	uncultured marine group II euryarchaeote	uncultured marine group II euryarchaeote	0	5	12	4	0	1	0	0	0	0	0	0	4	5	0	0	0	0	0	0	0	0
OTU_990	Archaea	Thaumarchaeota	Marine Group I	Unknown Order	Unknown Family	Candidatus Nitrosopelagicus	uncultured archaeon	0	0	0	0	0	0	0	0	0	0	0	0	1	0	0	0	0	0	1	0	0	0
OTU_991	Archaea	Woesearchaeota (DHVEG-6)	uncultured crenarchaeote	uncultured crenarchaeote	uncultured crenarchaeote	uncultured crenarchaeote	uncultured crenarchaeote	0	0	0	0	0	0	0	0	0	0	0	0	0	0	0	1	0	0	0	0	0	0
OTU_992	Archaea	Thaumarchaeota	Marine Group I	uncultured marine archaeon	uncultured marine archaeon	uncultured marine archaeon	uncultured marine archaeon	0	0	1	0	0	0	0	0	3	0	0	0	0	0	0	0	0	0	2	0	0	0
OTU_993	Archaea	Euryarchaeota	Methanomicrobia	Methanosarcinales	Methanosaetaceae	Methanosaeta	uncultured Methanosarcinales archaeon	0	0	0	0	0	0	0	0	0	0	0	0	0	0	0	0	0	1	0	0	0	1
OTU_994	Archaea	Woesearchaeota (DHVEG-6)	uncultured euryarchaeote	uncultured euryarchaeote	uncultured euryarchaeote	uncultured euryarchaeote	uncultured euryarchaeote	0	0	0	0	0	1	0	17	0	66	0	0	0	0	0	1	0	0	4	0	0	0
OTU_995	Archaea	Thaumarchaeota	Marine Group I	Unknown Order	Unknown Family	Candidatus Nitrosopelagicus	uncultured thaumarchaeote	0	0	0	0	0	0	0	0	1	0	0	0	0	0	0	0	0	0	0	0	0	0
OTU_996	Archaea	Euryarchaeota	Thermoplasmata	Thermoplasmatales	Marine Group II	uncultured marine group II euryarchaeote HF70_91G08	uncultured marine group II euryarchaeote HF70_91G08	4	0	0	0	0	0	23	0	0	0	0	1	0	0	0	0	0	0	0	0	0	0
OTU_997	Archaea	Euryarchaeota	Thermoplasmata	Thermoplasmatales	Marine Group II	uncultured marine group II euryarchaeote HF200_89A11	uncultured marine group II euryarchaeote HF200_89A11	1	0	0	0	0	0	0	0	0	0	0	0	0	0	0	0	0	0	0	0	0	0
OTU_998	Archaea	Euryarchaeota	Thermoplasmata	Thermoplasmatales	Marine Group II	Unclassified	Unclassified	0	4	1	4	2	1	0	0	3	0	3	1	5	0	0	1	4	2	2	0	9	0
OTU_999	Archaea	Thaumarchaeota	Marine Group I	Unclassified	Unclassified	Unclassified	Unclassified	0	0	0	0	0	0	0	0	0	0	0	0	0	0	0	0	3	0	0	0	0	0
