# Supplementary material for: Characterization of particle-associated and free-living bacterial and archaeal communities along the water columns of the South China Sea
Source: Copernicus journal article supplement (doi:10.5194/bg-2020-115), 2020-04-14
Supplement: Supplementary file [file bg-2020-115-AC1-supplement.pdf]

1 **Characterization of particle-associated and free-living bacterial and**  
2 **archaeal communities along the water columns of the South China Sea**

3

4 Jiangtao Li<sup>a</sup>, Lingyuan Gu<sup>a</sup>, Shijie Bai<sup>b</sup>, Jie Wang<sup>c</sup>, Lei Su<sup>a</sup>, Bingbing Wei<sup>a</sup>, Li Zhang<sup>d</sup> and Jiasong Fang<sup>e,f,g,\*</sup>

5

6 <sup>a</sup>State Key Laboratory of Marine Geology, Tongji University, Shanghai 200092, China;

7 <sup>b</sup>Institute of Deep-Sea Science and Engineering, Chinese Academy of Sciences, Sanya, China;

8 <sup>c</sup>College of Marine Science, Shanghai Ocean University, Shanghai 201306, China;

9 <sup>d</sup>School of Earth Sciences, China University of Geosciences, Wuhan, China;

10 <sup>e</sup>The Shanghai Engineering Research Center of Hadal Science and Technology, Shanghai Ocean University,  
11 Shanghai 201306, China;

12 <sup>f</sup>Laboratory for Marine Biology and Biotechnology, Qingdao National Laboratory for Marine Science and  
13 Technology, Qingdao 266237, China;

14 <sup>g</sup>Department of Natural Sciences, Hawaii Pacific University, Kaneohe, HI 96744, USA.

15

16 \*Corresponding author: [jfang@hpu.edu](mailto:jfang@hpu.edu)

17 **Abstract**

18 There is a growing recognition of the role of particle-attached (PA) and free-living (FL) microorganisms in  
19 marine carbon cycle. However, current understanding of PA and FL microbial communities is largely on  
20 those in the upper photic zone, and relatively fewer studies have focused on microbial communities of the  
21 deep ocean. Moreover, archaeal populations receive even less attention. In this study, we determined  
22 bacterial and archaeal community structures of both the PA and FL assemblages at different depths, from the  
23 surface to the bathypelagic zone along two water column profiles in the South China Sea. Our results suggest  
24 that environmental parameters including depth, seawater age, salinity, POC, DOC, DO and silicate play a  
25 role in structuring these microbial communities. Generally, the PA microbial communities have relatively  
26 low abundance and diversity compared with the FL microbial communities at most depths. Further microbial  
27 community analysis revealed that PA and FL fractions generally accommodate significantly divergent  
28 microbial compositions at each depth. The PA bacterial communities mainly comprise members of  
29 *Actinobacteria* and  $\gamma$ -*Proteobacteria*, together with some from *Bacteroidetes*, *Planctomycetes* and  $\delta$ -  
30 *Proteobacteria*, while the FL bacterial lineages are mostly distributed within  $\alpha$ -,  $\gamma$ -*Proteobacteria*,  
31 *Actinobacteria* and *Bacteroidetes*, along with certain members from  $\beta$ -,  $\delta$ -*Proteobacteria*, *Planctomycetes*  
32 and *Firmicutes*. Moreover, there is an obvious shifting in the dominant PA and FL bacterial compositions  
33 along the depth profiles from the surface to the bathypelagic deep. By contrast, both PA and FL archaeal  
34 communities dominantly consist of Marine Group II (MGII) and Marine Group I (MGI), together with  
35 variable minor Marine Group III (MGIII), *Methanosarcinales*, Marine Benthic Group A (MBG-A) and  
36 *Woesearchaeota*. However, the pronounced distinction of archaeal community compositions between PA and  
37 FL fractions are observed at finer taxonomic level. A high proportion overlap of microbial compositions  
38 between PA and FL fractions implies that most microorganisms are potentially generalists with PA and FL  
39 dual lifestyle for versatile metabolic flexibility. In addition, microbial distribution along the depth profile  
40 indicates a potential vertical connectivity between the surface-specific microbial lineages and those in the  
41 deep ocean, likely through microbial attachment to sinking particles.

42

43 **Keywords:** particle-attached, free-living, marine microbe, vertical distribution, sinking particles, deep ocean,  
44 the South China Sea.

## 45 1. Introduction

46 The sinking of particulate organic matter (POM) formed in the photic layer is a fundamental process  
47 that transports carbon and nutrient materials from the surface into the usually starved deep ocean, with  
48 a significant role in structuring the distributions and activities of marine microorganisms in the dark  
49 realm (Azam and Malfatti, 2007; Mestre et al., 2018; Suter et al., 2018). During sinking, the POM is  
50 generally colonized and concurrently, decomposed by particle-attached (PA) prokaryotes, releasing  
51 dissolved organic matter (DOM) into ambient seawater, fueling the free-living (FL) microbes (Kiorboe  
52 and Jackson, 2001; Azam and Malfatti, 2007). It has been revealed that PA and FL microbial  
53 populations exhibit different taxonomic composition, physiology and metabolism, corresponding to  
54 their lifestyle and ecological behavior. For example, PA bacteria, compared to FL bacteria, are often  
55 larger in size (Aldredge et al., 1986; Zhang et al., 2007; Lauro et al., 2009) and metabolically more  
56 active (Karner and Herdl, 1992; Grossart et al., 2007). They often maintain higher levels of  
57 extracellular enzymes, adhesion proteins and antagonistic compounds, and are capable of degrading  
58 high-molecular-weight (HMW) organic compounds (Smith et al., 1992; Crump et al., 1998; Long and  
59 Azam, 2001; Mevel et al., 2008; Ganesh et al., 2014). Recently, examination of microbial  
60 metagenomes suggests that there are notable differences between PA and FL assemblages in GC  
61 content, effective genome size, general taxonomic composition and functional gene categories (Smith  
62 et al., 2013). In particular, some broad key functional gene categories involved in DOM utilization  
63 (Poretsky et al., 2010; Rinta-Kanto et al., 2012) and specific functional gene groups linked to  
64 successive decomposition of phytoplankton blooms (Teeling et al., 2012) are significantly different,  
65 indicating the fundamental differences in survival strategies in relation to potentially available  
66 substrates. It is further revealed that PA microbes generally have larger genomes with a variety of  
67 metabolic and regulatory capabilities of utilizing compositionally varied organic matter, while the  
68 genomes of FL microbes usually are smaller with streamlined metabolic and regulatory functions that  
69 enable efficient adaption to oligotrophic conditions (Smith et al., 2013; Yawata et al., 2014; Yung et  
70 al., 2016). Phylogenetically, PA and FL lineages generally exhibit different compositions. The PA  
71 fraction is relatively enriched in members of  $\gamma$ -*Proteobacteria*, *Verrucomicrobia*, *Bacteroidetes*,  
72 *Firmicutes* and *Planctomycetes* (Azam and Malfatti, 2007; Milici et al., 2016; Salazar et al., 2016;  
73 Suter et al., 2018), while the FL assemblages are often populated by members of  $\alpha$ -*Proteobacteria*  
74 (SAR11 clade or *Ca. Pelagibacter*) and *Deferribacteres* (DeLong et al., 1993; Crespo et al., 2013;  
75 Milici et al., 2017). However, significantly overlapped compositions of PA and FL microbial  
76 communities were also reported in a few studies (Hollibaugh et al., 2000; Ghiglione et al., 2007;  
77 Ortega-Retuerta et al., 2013; Rieck et al., 2015; Liu et al., 2018a). Actually, most members of the PA  
78 and FL clades are generalists which switch their lifestyles via attachment and detachment to particles  
79 (Crespo et al., 2013; Li et al., 2015). As revealed in many marine niches,  $\alpha$ -*Proteobacteria*,  $\gamma$ -  
80 *Proteobacteria* and *Bacteroidetes* are the major overlapped phyla in both PA and FL microbial  
81 fractions (Yung et al., 2016).

82 Our current knowledge of PA and FL microbial populations largely relies on the upper photic ocean,  
83 whereas little information is known from the deep dark ocean, which is the largest biome and  
84 accommodates more than half of the ocean's microbes (Aristegui et al., 2009; Salazar et al., 2016).  
85 Recently, a number of studies have revealed the PA and FL communities in the bathypelagic waters (Li

86 et al., 2015; Salazar et al., 2015; Milici et al., 2017; Mestre et al., 2018) or the deepest abyssal and  
87 hadal environments (Eloe et al., 2011; Tarn et al., 2016; Liu et al., 2018a). It is shown that PA and FL  
88 bacterial communities in the deep ocean have clear differences in abundance and composition, in  
89 addition to the detection of novel, unknown prokaryotic taxa. Furthermore, although archaea are a  
90 major component of the marine ecosystem and play significant roles in the degradation of organic  
91 materials (Iverson et al., 2012; Suzuki et al., 2017), PA and FL archaeal communities receive less  
92 attention and little is known about them. Previous limited reports have observed controversial results,  
93 as several studies showed that no obvious differences in archaeal community structures between PA  
94 and FL assemblages (Galand et al., 2008; Eloe et al., 2011; Suzuki et al., 2017), while a clear  
95 separation was found in recent reports (Tarn et al., 2016), with PA archaeal fraction dominated by  
96 Marine Group II (MGII) and Marine Group III (MGII), and FL archaeal fraction by Marine Group I  
97 (MGI) and anaerobic methane-oxidizing archaea (ANME). In brief, it is not well known about the  
98 changes of PA and FL prokaryotes along vertical profiles of water column, from the surface to the  
99 deep bathyal, abyssal and hadal depths.

100 In this study, we analyzed and compared microbial compositions between PA and FL fractions at  
101 different depths along the vertical profile in the South China Sea (SCS). The SCS is a marginal sea  
102 located in the Northwest Pacific with a maximal depth of approximately 5,380 m (Fig. S1). Our results  
103 reveal diverse and significantly divergent microbial compositions in PA and FL fractions, and obvious  
104 community stratification at different depths along the vertical profiles.

## 105 **2. Materials and Methods**

### 106 **2.1 Sample collection and environmental parameter measurements**

107 Seawater samples were collected from two stations, G3 station, depth of 4,039 m at 117° 00.131' E,  
108 16° 59.947' N, and J5 station, depth of 4,301 m at 114° 00.209' E, 13° 59.958' N, located in the central  
109 deep basin of the SCS during the Open Cruise of R/V *Dongfanghong* II from July 3 to 18, 2014 (Fig.  
110 S1). A Sea-Bird CTD rosette sampler (SBE 911 plus) with 12 L Niskin bottles (Seattle, Washington,  
111 USA) was used to collect seawater from six different depths (50, 200, 1,000, 2,000, 3,000, and 4,000  
112 m) at each station.

113 Basic environmental parameters of the water column, including depth, salinity, temperature and  
114 dissolved oxygen (DO) were obtained in situ using the conductivity-temperature-depth (CTD) profiler  
115 and a DO sensor during the sampling. Once water samples were collected onboard, about 0.1 L of  
116 seawater was taken immediately for pH measurement using a pH meter (Mettler Toledo Inc.,  
117 Switzerland).

118 Approximately 8 L of seawater was filtered onboard through a  $\Phi$ 142 mm precombusted glass fiber  
119 membrane (0.7  $\mu$ m nominal pore size, Whatman, USA) under a gentle vacuum of <150 mm Hg for  
120 particulate organic carbon (POC) collection. The membranes were folded and stored at -20°C until our  
121 POC analysis. Then about 30 mL of filtered seawater of each sample was collected into 40 mL  
122 precombusted EPA vials and stored at -20°C immediately for DOC concentration measurement

123 (laboratory on land). ~ 200 ml filtered seawater at each depth was stored at -20°C for analysis of  
124 nutrients ( $\text{NO}_3^-/\text{NO}_2^-$ , dissolved inorganic phosphate and silicate). The remaining seawater was stored  
125 at -20°C for other analyses.

126 At each depth, we collected 4 L of seawater to obtain microorganisms for further analysis. Seawater  
127 was filtered first through a  $\Phi 47$  mm polycarbonate (PC) membrane of 3.0  $\mu\text{m}$  nominal pore size  
128 (Millipore, USA) and subsequently, through a  $\Phi 47$  mm PC membrane of 0.22  $\mu\text{m}$  nominal pore size  
129 (Millipore, USA) to collect the PA and FL microorganisms, respectively (Eloe et al., 2011). The  
130 membranes were then frozen at -80°C until further microbial analysis.

131 Concentration of POC was determined with a PE2400 Series II CHNS/O analyzer (Perkin Elmer,  
132 USA) (Chen et al., 2008). DOC concentration was measured using a Shimadzu TOC-V Analyzer  
133 (Shimadzu Inc., Japan) (Meng et al., 2017). Nutrients were determined using a Four-channel  
134 Continuous Flow Technicon AA3 Auto-Analyzer (Bran-Lube GmbH, German).

## 135 **2.2 DNA extraction**

136 In this study, we used the SDS-based method to extract the total DNA as described by Li et al. (2015)  
137 with minor modifications. The PC membranes containing seawater microbes were first cut into small  
138 pieces in a sterile petri dish and put into autoclaved 2 ml centrifuge tubes. 800  $\mu\text{L}$  DNA extraction  
139 buffer consisting of 100 mM Tris-HCl, 100 mM sodium EDTA, 100 mM sodium phosphate, 1.5 M  
140 NaCl and 1% CTAB was added into each tube. The centrifuge tubes were frozen in liquid nitrogen and  
141 then thawed in a 65°C water bath. This procedure was repeated for 3 times. When the centrifuge tubes  
142 cooled down to room temperature proteinase K was added with a final concentration of ~ 0.2  $\text{mg mL}^{-1}$ .  
143 The tubes were then incubated in a 65°C water bath for 2 h and shaken gently every about 30 min.  
144 Then, 800  $\mu\text{L}$  phenol/chloroform/isoamyl alcohol (25:24:1, v/v) was added into the centrifuge tubes  
145 and the tubes were shaken gently several times, and centrifuged at 12,000  $\times g$  for 10 min. The  
146 supernatant was carefully transferred into new tubes and equal volume of chloroform/isoamyl alcohol  
147 (24:1, v/v) was added. The tubes were centrifuged at 12,000  $\times g$  for 10 min. The aqueous layer was  
148 pipetted into clean 2 ml tubes, and 0.6 volume of cold isopropanol and 0.1 volume of 3M sodium  
149 acetate were added. The centrifuge tubes were incubated at -20°C for 1 h and centrifuged at 12,000  $\times g$   
150 for 10 min. The liquids were carefully discarded and DNA pellets at the bottom were gently rinsed  
151 with 70% pre-cooling ethanol. Finally, each DNA was suspended into sterile deionized  $\text{H}_2\text{O}$  with a  
152 volume of 50  $\mu\text{L}$ .

## 153 **2.3 Pyrosequencing and analysis of 16S rRNA gene sequence amplicons**

154 Before PCR amplification, we first used the PicoGreen dsDNA Quantitation Kit (Life Technologies,  
155 USA) to quantify the concentration of DNA. For the PCR amplification of bacterial 16S rRNA gene,  
156 the primer set 27F (5'-AGA GTT TGA TCC TGG CTC AG-3') and 533R (5'-TTA CCG CGG CTG  
157 CTG GCA C-3') with 10-nucleotide barcodes were used, while Arch344F (5'-ACG GGG YGC AGC  
158 AGG CGC GA-3') and Arch915R (5'-GTG CTC CCC CGC CAA TTC CT-3') containing 8-  
159 nucleotide barcodes were used for archaea. The reaction condition for PCR amplification was: firstly,

160 94°C, 5 min; then, 94°C, 50 s, 53°C, 50 s, and 72°C, 50 s, total 25 cycles; 72°C, 6 min. The products  
161 after PCR amplification were purified with the MiniBEST DNA Fragment Purification Kit (Takara Bio  
162 Inc, Japan) and then quantified using the NanoDrop 2000 (Thermo Scientific, USA). The  
163 pyrosequencing was carried out at the Majorbio Bio-Pharm Technology, Co., Ltd. (Shanghai, China)  
164 with the 454 GS-FLX Titanium system (Roche, Switzerland).

165 QIIME 1.9.1 was used to perform the following phylogenetic analysis of pyrosequenced amplicons.  
166 As described in our previous study (Li et al., 2017), the low-quality reads were first filtered with the  
167 following quantity control (QC) criteria: (1) the reads with ambiguous nucleotides; (2) the length of  
168 reads < 200 bp; (3) the reads containing > 5 bp homopolymers; (4) the reads with an average flowgram  
169 score < 25 in a quality window of 50 bp. The Operational Taxonomic Units (OTUs) were generated  
170 based on 3% cutoff of sequence similarity, and the longest sequence was picked as the representative  
171 sequence of each OTU for downstream analysis. The RDP classifier was used for the taxonomy  
172 assignment by against the SILVA 16S rRNA gene database (Version 119). The ChimeraSlayer in the  
173 QIIME package was used to identify and exclude those of potential chimeras after alignment with  
174 PyNAST.

## 175 **2.4 Diversity estimators and statistical analyses of microbial communities**

176 Similarities among different microbial communities were determined using similarity matrices  
177 generated according to the phylogenetic distance between reads (Unifrac distance), and beta diversity  
178 of principal coordinates analysis (PCoA) was computed as components of the QIIME pipeline. The  
179 correlation between the microbial community structures and environmental parameters was analyzed  
180 by canonical correspondence analysis (CCA) and Mantel test. All statistical analyses were performed  
181 by R project (v 3.2.1) using the Vegan and Agricolae packages.

182 In this study, we used the “odds ratio” to assess microbial preference to the PA or FL lifestyles. As  
183 defined by Ganesh et al. (2014), the formula of the “odds ratio” is as:

$$184 \quad \text{odds ratio} = \log_{10} (\text{relative abundance in PA fraction} / \text{relative abundance in FL fraction})$$

185 a positive value indicates the PA preference, while a negative value signifies the FL preference (Suter  
186 et al., 2018).

## 187 **2.5 Quantification of 16S rRNA gene and cell abundance estimation**

188 The copy number of microbial 16S rRNA gene for PA and FL fractions were estimated with 7500  
189 Real-Time PCR System (Applied Biosystems, ThermoFisher, UK). The primer sets used were  
190 341f/518r for bacteria (Dilly *et al.*, 2004) and 344f/519r for archaea (Bano *et al.*, 2004) with about 200  
191 bp amplified DNA fragments. PCR reaction was carried out in a 20 µL amplification volume. The  
192 reaction mixture contained 1 µL of DNA template, 0.15 µM forward and reverse primers, and 10 µL  
193 Power SYBR Green PCR Master Mix (Life technologies, UK). The PCR amplification conditions  
194 included: 95°C, 10 min to activate polymerase; 95°C, 15 sec, 60°C, 1 min, 40 cycles. A negative

195 control was used to monitor potential contamination and agarose gel electrophoresis helped to confirm  
196 the absence of nonspecific amplification. Melt curves were generated using the Applied Biosystems  
197 real-time PCR system software with default thresholds. Each sample had triplicate amplifications and  
198 the average copy number of 16S rRNA gene were calculated. To make a comparison between bacterial  
199 and archaeal abundances, we converted copy number of 16S rRNA gene into cell abundance based on  
200 the assumption that on average, a bacterial cell had 4.08 16S rRNA gene copies while archaea  
201 contained 1.71 copies per cell (Lee *et al.*, 2009).

## 202 **3. Results**

### 203 **3.1 Environmental parameters of the water columns**

204 Fundamental environmental parameters, including temperature, salinity, pH, DO and POC are listed in  
205 Table 1. In general, they showed similar vertical trends with the normal pelagic ocean. Salinity  
206 increased gradually from ~ 33.84 PSU at 50 m to ~ 34.52 at 200 m and 1,000 m, then maintained at  
207 around 34.6 PSU at greater depths until 4,000 m. DO concentration was the highest (~ 204.5  $\mu\text{M}$ ) at  
208 surface water, and decreased gradually to the lowest (~ 83.9  $\mu\text{M}$ ) at 1,000 m depth, then increased  
209 gradually from ~ 102  $\mu\text{M}$  at 2,000 m to ~ 113.5  $\mu\text{M}$  at 4,000 m. Nitrite concentrations of the water  
210 columns at all depths were below the detection limit. Concentrations of nitrate, phosphate, and silicate  
211 were continuously increasing from the surface to 1,000 m depth, and then remained at relatively  
212 constant levels (Table 1).

213 As expected, age of the seawater determined from  $\Delta^{14}\text{C}_{\text{DIC}}$  was youngest at the surface and increased  
214 with depth linearly, varying from about 106 to 1650 years. The upper water layers (50 m and 200 m)  
215 from the two stations had the youngest and nearly the same ages, around 106 years. Ages of 1,000 m  
216 and 2,000 m in G3 station were almost identical, around 1,180 years, and increased to 1,600 years at  
217 3,000 m and 1,750 years at 4,000 m. By contrast, age of 1,000 m in J5 station was ~ 1,310 years, and  
218 remained relatively stable below 1,000 m with the age of about 1,650 years (Table 1). DOC  
219 concentrations ranged from 63.07 to 40.34  $\mu\text{mol/L}$ , with the highest at the surface and lowest at the  
220 deep. However, POC concentrations varied greatly between 0.5 and 2.1  $\mu\text{mol/L}$  and showed great  
221 variations. The POC concentrations were highest at 3,000 m of the G3 station (1.8  $\mu\text{mol/L}$ ) and at  
222 1,000 m of the J5 station (2.1  $\mu\text{mol/L}$ ) (Table 1).

### 223 **3.2 Microbial cell abundances**

224 The estimated abundances of bacteria and archaea were about  $10^6 \sim 10^9$  cells  $\text{L}^{-1}$  and  $10^6 \sim 10^7$  cells  $\text{L}^{-1}$   
225 <sup>1</sup>, respectively (Fig. 1). The FL bacterial fraction generally accommodated higher cell abundances  
226 (varying from  $0.62 \times 10^7$  to  $1.65 \times 10^8$  cells  $\text{L}^{-1}$ ), several times higher than their corresponding PA  
227 fraction ( $1.85 \times 10^6 \sim 1.70 \times 10^9$  cells  $\text{L}^{-1}$ ). However, one lower abundance of FL bacterial fraction than  
228 PA fraction was detected in the surface water (50 m) of the G3 station where PA bacterial abundance  
229 was up to  $1.23 \times 10^9$  cells  $\text{L}^{-1}$ , two orders of magnitude higher than that of the FL fraction ( $1.62 \times 10^7$   
230 cells  $\text{L}^{-1}$ ) (Fig. 1a). The upper seawater layers (50 m and 200 m) were also inhabited with the highest

231 abundance of archaea. FL archaeal fraction had the cell abundances between  $1.01 \times 10^6$  and  $8.62 \times 10^6$   
232 cells  $L^{-1}$ , while that of PA archaeal fraction ranged from  $1.28 \times 10^5$  to  $6.50 \times 10^7$  cells  $L^{-1}$ . At other  
233 depths, cell densities of archaeal FL fraction varied between  $1.01 \sim 3.88 \times 10^6$  cells  $L^{-1}$  and  $0.74 \sim 8.62$   
234  $\times 10^6$  cells  $L^{-1}$  for G3 and J5 stations, respectively. PA archaeal fraction fluctuated between  $1.90 \times 10^5$   
235 and  $5.54 \times 10^6$  cells  $L^{-1}$ . Similar to bacteria, the FL archaeal fractions usually showed higher cell  
236 abundances than their PA fractions (Fig. 1b).

### 237 3.3 Estimation of microbial diversity

238 Totally 92,041/81,761 and 73,094/97,611 valid sequences of bacterial 16S rRNA gene were obtained  
239 for FL/PA fractions of G3 and J5 stations, respectively. The average valid sequences, including both  
240 PA and FL bacteria were 14,354 sequences per depth. Based on the 97% similarity, these FL and PA  
241 bacterial sequences were defined into a total of 6,666 operational taxonomic units (OTUs). The  
242 number of OTUs in the FL and PA bacterial fractions at each depth ranged from 214 to 1,470 (Table  
243 S1). Correspondingly, 50,736/41,719 and 44,456/38,333 archaeal sequences were determined for  
244 FL/PA archaea fractions of G3 and J5 stations. Attempt to determine PA archaeal sequence from 3,000  
245 m depth of G3 station and 4,000 m depth of J5 station failed because of technical reasons. The average  
246 number of archaeal sequences (including PA and FL archaea) were 7,966 sequences per depth. A total  
247 of 1,071 archaeal OTUs were defined and the number of OTUs for the FL and PA archaeal fractions  
248 varied from 82 to 275 (Table S2).

249 Shannon's diversity (H) and Chao1 were calculated to estimate microbial diversity of both PA and FL  
250 fractions at all depths (Fig. 2 and Fig. S2). In most cases, the H indices of the bacterial FL fractions  
251 were always higher than their PA counterparts at each depth (Fig. 2). H index of FL and PA bacterial  
252 fractions gradually increased from 50 to 1,000 m, decreased from 1,000 to 2,000 m, and increased  
253 again from 2,000 to 4,000 m (Fig. 2a). Similar to bacteria, FL archaea had higher H index values than  
254 the PA fraction. The H index was usually the lowest at the surface, increased to the highest value at  
255 200 m or 1,000 m and decreased continuously into the deep (Fig. 2b). Chao1 index showed similar  
256 variation trends for both PA and FL microbial fractions (Fig. S2).

257 PCoA analysis revealed that there were significant differences in bacteria and archaea community  
258 structures over the depth profiles and between the FL and PA fractions. Overall, three groups were  
259 distinguished, the surficial 50 m group, the FL group, and the PA group (Fig. 3). One incompact group,  
260 consisted exclusively of samples at 50 m depth, separated the microbes in the surface from those in the  
261 rest of the water column of both stations, irrespective of microbial lifestyles (FL or PA). However, the  
262 other two groups were separated mainly based on the FL and PA lifestyles. It is interesting to note that  
263 the FL bacterial samples clustered into one group where samples were further partitioned with respect  
264 to depth (Fig. 3a). Canonical correspondence analysis (CCA) showed that fundamental environmental  
265 parameters including depth, DO, salinity, seawater age, DOC and POC concentration, and silicate  
266 exerted potential impact on variations of FL and PA microbial communities along the water column  
267 (Fig. 4, Fig. S3). Mantel test further indicated that all those factors, except POC concentration ( $P$   
268  $=0.164$ ), were the statistically significant variables associated with variation of PA and FL fractions ( $P$   
269  $=0.001$ ).



### 270 3.4 Taxonomic compositions of the PA and FL bacterial and archaeal fractions

271 Taxonomic compositions of FL and PA bacterial fractions and their relative abundances are presented  
272 in Fig. 5. At phylum level, bacterial sequences were mainly assigned into *Proteobacteria* ( $\alpha$ -,  $\beta$ -,  $\gamma$ -,  
273 and  $\delta$ -), *Actinobacteria*, *Cyanobacteria*, *Planctomycetes*, *Bacteroidetes*, *Marinimicrobia* (SAR406  
274 clade), *Chloroflexi*, *Firmicutes*, *Gemmatimonadetes*, *Gracilibacteria* and *Verrucomirobia*. The taxa at  
275 family level with relatively high abundances on average in either PA or FL fraction were further shown  
276 in Fig. 6.

277 It is clear that  $\alpha$ - and  $\gamma$ -*Proteobacteria* were the dominant lineages in both the FL and PA fractions at  
278 nearly all depths. In most cases, the sum of  $\alpha$ - and  $\gamma$ -*Proteobacteria* accounted for ~ 40% to nearly  
279 90%. Moreover, their relative abundances in different PA and FL fractions and different stations also  
280 varied widely. Within the  $\alpha$ -*Proteobacteria*, the dominant families included *Methylobacteriaceae*,  
281 *Phyllobacteriaceae*, *Rhodobacteraceae* and *Erythrobacteraceae* (Fig. 6). Members of the families  
282 *Methylobacteriaceae* and *Erythrobacteraceae* occurred commonly in both fractions at almost all  
283 depths but usually with higher proportions in PA fractions. The family *Rhodobacteraceae* occurred  
284 commonly in both fractions at every depth (1 % ~ 20%), while the *Phyllobacteriaceae* was dominantly  
285 distributed in the PA fraction of 2,000 m depth of J5 station with > 60% proportions. In addition,  
286 another important lineage within  $\alpha$ -*Proteobacteria* is SAR11 clade (now named as *Pelagibacterales*)  
287 (Grote et al., 2012). It was clearly revealed that SAR11 clade showed relative higher abundances in FL  
288 fractions than PA fractions. Moreover, at depths above 1000 m, SAR11 clade had a far higher  
289 proportion than the deep ocean and the maximum levels occurred at 200 m depth (20% ~ 24%) (Fig. 6,  
290 Table S1).  $\gamma$ -*Proteobacteria* is another lineage with the highest abundance overall. Its relative  
291 abundances change significantly with depths and in different fractions. The minimum abundances  
292 were only 1% ~ 5%, while the maximum were up to 73% ~ 80% (Fig. 5 and Table S1). Moreover, G3  
293 station generally had higher  $\gamma$ -*proteobacteria* proportions than that of J5 station on average. As shown  
294 in Fig. 6, although sequences of  $\gamma$ -*Proteobacteria* were classified into multiple families, actually only  
295 two families *Alteromonadaceae* and *Pseudoaltermonadaceae* exhibited dominant prevalence in the  
296 bacterial populations. The *Pseudoaltermodaceae* populated predominantly the PA fractions in 50 m  
297 and 200 m depths (66% ~ 75%), while the *Alteromonadaceae* mainly dominated the PA fractions in  
298 the deep water, particularly at 2,000 m and 3,000 m depths.  $\delta$ -*Proteobacteria* also had a common  
299 distribution in both fractions of all depths, usually accounting for less than 10% proportions in most  
300 samples (Fig. 5), and SAR324 clade members contributed significantly to the dominance of the  $\delta$ -  
301 *Proteobacteria* (Fig. 6). *Actinobacteria* and *Cyanobacteria* were abundantly distributed only in the  
302 surficial 50 m depth, and by sharp contrast, their proportions in other depths were less than 5%. Other  
303 bacterial lineages which had a wide distribution in all depths but only with minor abundances in both  
304 fractions included *Planctomycetes*, *Bacteroidetes*, *Marinimicrobia* (SAR406 clade), *Chloroflexi*,  $\beta$ -  
305 *Proteobacteria*, *Firmicutes*, *Gemmatimonadetes* and *Verrucomicrobia* (Fig. S4).

306 Majority of archaeal amplicons were mainly fallen into several uncultured taxonomic lineages (Fig. 7  
307 and Fig. S5). Both FL and PA archaeal fractions at all depths were principally populated by Marine  
308 Group I (MGI) of the *Thaumarchaeota* and Marine Group II (MGII) of the *Euryarchaeata*. Members  
309 from MGI and MGII lineages generally contributed more than 80% relative abundances in their  
310 respective clone libraries. MGI was always one of the most abundant clades along the vertical profiles

311 except in the topmost FL and PA fractions. Within the MGI group, only a small part of members were  
312 annotated into the cultured genus *Nitrosopumilus* and *Candidatus Nitrosopelagicus*, while the majority  
313 of them fell into those uncultured subclades (Table S2). MGII clade exhibited a wide distribution  
314 along the water columns, and it usually accounted for the large proportions in both archaeal size  
315 fractions. The photic layer (~ 50 m depth) contained the highest abundances of MGII clade,  
316 particularly in FL fractions with up to ~ 80% proportions. By sharp contrast, the lowest abundances of  
317 MGII occurred at 2,000 m (G3 station) and 3,000 m (J5 station) depths, making up <20% percentages.  
318 The third most abundant clade overall is Marine Group III (MGIII) of the *Euryarchaeata*. MGIII  
319 representatives were mainly dispersed in the FL fractions with 5% ~ 18% abundances, while they were  
320 absent from most of the PA fractions. The order *Methanosarcinales* of *Euryarchaeata* was detected  
321 commonly in most PA fractions, but it had the higher abundance only in the upmost 50 m depth (~  
322 29.7%) (Fig. 7). Another sample accommodating relatively much *Methanosarcinales* was the PA  
323 fraction of 3,000 m in J5 station with 9.1% proportion. Within the *Euryarchaeata*, another clade of  
324 methanogens, *Methanobacteriales*, was also detected from both size fractions but with low relative  
325 abundances (<5%) (Fig. 7, Fig. S5, Table S2). In addition, other archaeal lineages included  
326 *Woesearchaeota* (formerly known as the DHVEG-6 group), Miscellaneous Crenarchaeotic Group  
327 (MCG, now named as *Bathyarchaeota*), the *Halobacteriales* of the *Euryarchaeata* and Marine Benthic  
328 Group A (MBG-A) of the *Thaumarchaeota*. They just provided a limited contribution to archaeal  
329 populations (Fig. S5).

### 330 3.5 Bacterial preference to PA or FL lifestyles

331 Odds ratio was used to assess the preference of bacterial taxonomic lineages to the PA or FL lifestyle.  
332 A positive odds ratio indicates PA preference or higher abundance in the PA fraction, while a negative  
333 value suggests FL preference or higher abundance in the FL fraction. The bacterial lineages  
334 dominating the PA fractions come exclusively from  $\alpha$ - and  $\gamma$ -*Proteobacteria* (Fig. 6). At family level,  
335 the dominant clades comprised of the *Phyllobacteriaceae*, *Methylobacteriaceae*, *Erythrobacteraceae*,  
336 *Rhodobacteraceae* ( $\alpha$ -*Proteobacteria*), and *Pseudoalteromonadaceae*, *Alteromonadaceae* ( $\gamma$ -  
337 *Proteobacteria*) (Fig. 6) and they show a clear preference to PA lifestyle at different depths (Fig. 8).  
338 Except for these prevalent families, there is a wide range of lineages also showing preference to  
339 particle-attached lifestyle but with relatively low abundance (Fig. 6 and Fig. 8). These minor lineages  
340 are mainly populated by the families *Oceanospirillaceae* and *Alcanivoracaceae* ( $\gamma$ -*Proteobacteria*),  
341 *Sandaracinaceae* and *Bdellovibrionaceae* ( $\delta$ -*Proteobacteria*), *Burkholderiaceae* ( $\beta$ -*Proteobacteria*),  
342 *Saprospiraceae* (*Bacteroidetes*), *Planctomycetaceae* and *Phycisphaeraceae* (*Planctomycetes*),  
343 SAR406 clade (*Marinimicrobia*), *Cryomorphaceae* and *Flavobacteriaceae* (*Bacteroidetes*),  
344 *Propionibacteriaceae*, *Nocardiodaceae* and *Corynebacteriaceae* (*Actinobacteria*).

345 The predominant lineages of FL fractions mainly consisted of members of *Actinobacteria*,  
346 *Cyanobacteria*, *Bacteroidetes*,  $\alpha$ - and  $\delta$ -*Proteobacteria*, as shown in Fig.5. At family level, the  
347 phylogenetic lineages with showing a FL preference are mainly populated by the families OM1 clade  
348 and Sva0996 marine group (*Actinobacteria*), SAR324 clade and *Nitrospinaceae* ( $\delta$ -*Proteobacteria*),  
349 *Cyanobacteria*, *Comamonadaceae* ( $\beta$ -*Proteobacteria*), *Erythrobacteraceae*, SAR11 clade,  
350 *Methylobacteriaceae*, *Bradyrhizobiaceae*, *Rhodobacteraceae*, *Hyphomonadaceae* ( $\alpha$ -*Proteobacteria*),  
351 *Phycisphaeraceae* and *Phycisphaeraceae* (*Planctomycetes*), SAR406 clade, *Saprospiraceae*,

352 *Chitinophagaceae*, *Cryomorpaceae*, *Flavobacteriaceae*, *Flammeovirgaceae* (Bacteroidetes) (Fig. 8).  
353 However, compared with counterparts of PA fractions, their abundances in FL fractions are low  
354 without absolute dominance.

## 355 **4. Discussion**

### 356 **4.1 Comparison of microbial abundance and diversity between PA and FL fractions**

357 PA bacterial and archaeal fractions show generally lower abundance and taxonomic richness than their  
358 FL counterparts and constitute a small fraction of the total abundances. Our results are consistent in  
359 principle with previous reports on various pelagic environments, in either the euphotic zone, twilight  
360 or the dark deep ocean (Turley and Stutt, 2000; Simon et al., 2002; Ghiglione et al., 2007; Rieck et al.,  
361 2015). However, in some eutrophic and notably particle-rich marine ecosystems, for example, marine  
362 snow or estuaries, PA bacterial fractions were present in higher local concentrations and greater  
363 diversity than FL bacteria (Caron et al., 1982; Karner and Herndl, 1992; Turley and Mackie, 1994;  
364 Garneau et al., 2009). In upper photic zone, PA bacterial abundance and their contribution to total  
365 bacterial biomass are highly variable, and depend largely on the quantity and quality of suspended  
366 organic particles (Cammen and Walker, 1982; Simon et al., 2002; Doxaran et al., 2012). This is indeed  
367 the case in the South China Sea. As shown in Fig. 1, at 50 m and 200 m depths of G3 station, PA  
368 bacterial abundances outnumbered FL bacteria by nearly 2 ~ 100 times, whereas J5 station has an  
369 opposite trend. However, as shown in Table 1, these two stations have almost the same environmental  
370 parameters, particularly in POC concentrations. One possibility may be that G3 and J5 have different  
371 POC compositions, attributable to different origins of organic matter. Although bacteria attaching to  
372 particles are of relatively lower abundance compared to free-living cells in the pelagic ocean, they are  
373 consistently metabolically more active with higher extracellular enzymatic activities (Karner and  
374 Herndl, 1992) and cell-specific thymidine incorporation rates (Turley and Mackie, 1994; Turly and  
375 Stutt, 2000). Therefore, PA bacteria often play a comparable role to free-living bacteria in hydrolysis  
376 or decomposition of marine organic matter, biomass production and carbon cycling (Griffith et al.,  
377 1994; Turly and Stutt, 2000; Liu et al., 2015). The decline of bacterial abundance and richness along  
378 the depth profile is largely owing to the gradual decreasing availability of usable organic carbon  
379 (Smith, 1992; Turly and Stutt, 2000; Jiao et al., 2014). In contrast, archaea are commonly much lower  
380 in cell abundance and community diversity compared with their bacterial counterparts at the same  
381 depths (Fig. 1-2 and Fig. S2). The relative abundance of archaeal populations in total prokaryotes  
382 increases gradually with depth, indicative of a potential rising impact on biogeochemical cycle in  
383 marine environments. In addition, pronounced distinction in microbial community structures of PA  
384 and FL assemblages were observed along the depth profile, which were well supported by results of  
385 statistical analyses (Fig. 3). It is expectable that PA fraction differs taxonomically from FL fraction,  
386 considering their discrepant activity patterns for survival. Related discussions are shown below.

### 387 **4.2 Environmental factors potentially shaping microbial community structure**

388 Several environmental parameters were supposed to play a pivotal role in structuring microbial

389 communities of seawater. Depth, together with age and salinity of water mass, are a key subset of  
390 environmental drivers (Fig. 4). Recent studies have shown that microbial populations in the meso-/  
391 bathypelagic ocean are largely dissimilar to those of the epipelagic zone (Salazar et al., 2015; Milici et  
392 al., 2017; Liu et al., 2018a), indicative of a crucial environmental selection process exerted by depth.  
393 In our study, PCoA analysis revealed that PA and FL fractions from the surficial zone (50 m) were  
394 clustered into a separate but relatively loose group distant from other depths (Fig. 3), indicative of the  
395 influence imposed from depth in shaping microbial community structures. Several bacterial lineages,  
396 including *Cyanobacteria*, *Actinobacteria*,  $\delta$ -*Proteobacteria*, *Marinimicrobia* (SAR406 clade) and  
397 *Firmicutes* with distinct distributing stratification contribute to this dissimilarity. *Cyanobacteria* and  
398 *Actinobacteria* belong to typical phototrophs (Mizuno et al., 2015) and they are prevalently distributed  
399 in euphotic zones. By contrast,  $\delta$ -proteobacterial SAR324 clade, as shown in our results, are primarily  
400 found in mesopelagic waters (200 ~ 1,000 m) (Fuhrman and Davis, 1997; Wright et al., 1997).  
401 SAR406 clade has a ubiquitous distribution across diverse marine niches, however, its high abundance  
402 always occurs within the mesopelagic zones, ~ five times or higher than in surface ocean (Yilmaz et  
403 al., 2016). Archaeal population components also reflect the impact of depth. Euphotic zones hold  
404 less abundant thaumarchaeotal MGI and more euryarchaeotal *Methanosarcinales* and *Woesearchaeota*  
405 (Fig. 7), while marine thaumarchaeotal groups are more abundant in meso- and bathypelagic waters  
406 (Karner et al., 2001; Mincer et al., 2007; Varela et al., 2008). In addition, Salazar et al. (2016) found  
407 that sampling depth appears to have a more direct impact on free-living bacterial communities. Our  
408 results are highly consistent with this observation in that FL bacterial fractions from the same depth  
409 grouped together irrespective of their sampling locations (G3 or J5 station) (Fig. 3a).

410 DO concentration is observed to strongly affect particle flux and particle transfer efficiency from  
411 euphotic zone to the deep sea since remineralization of organic particles appears to be oxygen-  
412 dependent (Laufkotter et al., 2017; Cram et al., 2018). It is considered as one of the best subsets of  
413 environmental variables for shaping the compositions of particle-attached bacterial assemblages  
414 (Salazar et al., 2016). Some taxonomic lineages are directly affected by oxygen. For example, a most  
415 recent study found that oxygen is one of the key factors driving the distribution and evolutionary  
416 diversity of *Woesearchaeota* (Liu et al., 2018b). POC and DOC can be substrates for both PA and FL  
417 communities, respectively (Azam and Malfatti, 2007; Zhang et al., 2016; Liu et al., 2019). However,  
418 POC concentration in the present study is not statistically significantly correlated with either bacterial  
419 or archaeal community abundances ( $P > 0.05$ ). We hypothesize that the quality rather than the quantity  
420 of POC imposes a decisive influence on microbial populations, especially in the deep, dark ocean.  
421 During the POC sinking from surface through the water column, the labile organic matter becomes  
422 increasingly decomposed, while the more refractory material remains and resists degradation (Simon  
423 et al., 2002). In such cases, utilization of refractory POC by microorganisms depends on the quality of  
424 POC. Among common nutrients, silicate exhibited statistically significant correlation with microbial  
425 distributions (Fig. S3), and this is out of our expectation because the SCS generally shows N- or P-  
426 limit in phytoplankton production (Wu et al., 2003; Chen et al., 2004). However, recent research found  
427 that near the sampling site of this study, there is a clear silicon deficiency in the euphotic zones  
428 shallower than 75 m (Huang et al., 2015), which directly influences the diversity and biomass of  
429 phytoplankton, and consequently, the quantity and quality of POM transported to the deep along the  
430 vertical water columns, and finally exerts a potential impact on microbial communities. Actually,  
431 microbial community structure and their distribution along the water column profile are a  
432 comprehensive combination impacted by multiple environmental variables.

### 433 4.3 Specialist or generalist for PA and FL lifestyle: clues from bacterial community compositions

434 It was suggested that PA and FL bacterial fractions accommodated different phylogenetic  
435 compositions along the depth profiles (Fig. 3), consistent with previous reports in various marine  
436 niches (Acinas et al., 1997; Moeseneder et al., 2001; Ghiglione et al., 2009; Salazar et al., 2015).  
437 However, in most cases, taxonomic compositional disparity between the two filtration fractions does  
438 not seem much apparent at phylum level (Fig. 5). Actually, a few studies also confirmed that at high  
439 taxonomic ranks, bacteria show conserved lifestyles either in association with particles or as free-  
440 living microorganism (Eloe et al., 2011; Salazar et al., 2015; Liu et al., 2018a). The pronounced  
441 contrast in population compositions of the two filtration fractions was unveiled only at greater  
442 taxonomic level and a considerable number of phylogenetic taxa exhibited different preferences to PA  
443 or FL lifestyles. As shown in Fig.5 and Fig.6, as the most abundant members,  $\alpha$ - and  $\gamma$ -*Proteobacteria*  
444 occurred prevalently in both filtration fractions, but at the family level, most of predominant bacterial  
445 lineages of PA and FL fractions were significantly divergent, indicating their preference to different  
446 microhabitats shaped by organic particles and environmental parameters. The dominant lineages in PA  
447 fractions were mainly associated with the families *Pseudoalteromonadaceae* and *Alteromonadaceae*  
448 within  $\gamma$ -*Proteobacteria*, and the *Methylobacteriaceae* within  $\alpha$ -*Proteobacteria*. These  $\gamma$ -  
449 *proteobacterial* members are usually retrieved from diverse marine habitats as the typical PA clades,  
450 and they are believed to have the abilities to degrade/utilize HMW organic compounds with higher  
451 nutrient requirements (DeLong et al., 1993; Crespo et al., 2013). The adhesion to particles could make  
452 them increase nutrients acquisition and avoid the nutrient-depleted conditions (Crespo et al., 2013). By  
453 contrast, members of  $\alpha$ -*Proteobacteria* are rarely reported as the dominant lineages of PA fraction or  
454 particle-attached preference (Crespo et al., 2013; Rieck et al., 2015; Suzuki et al., 2017), which is  
455 inconsistent with our results revealing  $\alpha$ -proteobacterial lineages frequently prevail as PA members.  
456 Further phylogenetic assignment revealed that the majority of  $\alpha$ -proteobacterial PA members  
457 exclusively belong to the genus *Methylobacterium* which are strictly aerobic, facultatively  
458 methylophilic bacteria, and can grow on a wide range of carbon compounds (Green, 2006). They  
459 probably benefit from the particle-attached lifestyle, making their high requirements for organic  
460 matters easily to achieve. Compared with bacterial PA counterparts, FL bacterial communities are  
461 more diverse, and dominant populations are scattered in more phylogenetic taxa with relatively  
462 homogeneous proportions. Among the predominant lineages, the actinobacterial OM1 clade and  
463 cyanobacteria dominantly govern the upper surficial waters (Fig. 6), likely attributed to their  
464 phototrophic behaviors. Although actinobacteria are recognized as ubiquitous members of marine  
465 bacterioplankton (Giovannoni and Stingl, 2005), they are scarcely reported with predominance (Milici  
466 et al., 2016a). Recently, Ghai et al. (2013) revealed the OM1 clade members possess the smallest cell  
467 sizes with streamlined genome, representing a typical adaptation to oligotrophic condition (Giovannoni  
468 et al., 2014) which well agrees with the oligotrophic environments in the SCS (li). Other predominant  
469 FL lineages include  $\alpha$ -proteobacterial SAR11 clade,  $\delta$ -proteobacterial SAR324 clade, and  
470 *Marinimicrobia* (SAR406 clade), all usually being the most ubiquitous free-living bacterial lineages  
471 and dominantly distributed in epi- and mesopelagic zones (Grote et al., 2012; Tarn et al., 2016; Yilmaz  
472 et al., 2016; Milici et al., 2017; Liu et al., 2018a). Genomic information underlines that although these  
473 clades have a flexible metabolism utilizing multiple hydrocarbon compounds, they generally lack of  
474 carbohydrate-active enzyme genes for the attachment to and the degradation of particulate organic  
475 matter (Peoples et al., 2018), consistent with their preference to free-living lifestyle rather than

476 particle-attachment (Eloe et al., 2011; Salazar et al., 2015; Tarn et al., 2016).

477 In addition to those predominant lineages mentioned above, there are a couple of bacterial taxa  
478 showing evident PA or FL preferences. At ~ family level, these PA- or FL-preferred taxa are well  
479 hinted by their odds ratio between PA and FL fractions. These bacterial lineages are characterized by  
480 low abundances or occasional occurrence in water columns (Fig. 6) but high odds ratio (absolute  
481 value) (Fig. 8), indicating their strong preferential divergence in the two size fractions. As shown in  
482 Fig. 8, such families with PA preference were mainly derived from the phyla/classes *Actinobacteria*  
483 and  $\gamma$ -*Proteobacteria*, together with several families from *Bacteroidetes*, *Planctomycetes* and  $\delta$ -  
484 *Proteobacteria*, while FL-preferred lineages are mostly distributed within  $\alpha$ -,  $\gamma$ -*Proteobacteria*,  
485 *Actinobacteria* and *Bacteroidetes*, along with certain groups of  $\beta$ -,  $\delta$ -*Proteobacteria*, *Planctomycetes*  
486 and *Firmicutes*. The majority of these lineages are recorded consistently about their PA- or FL  
487 preferences in previous studies, and commonly possess the ability to hydrolyze and utilize complex  
488 carbon sources. Although their abundance is low, these minor populations can still effectively  
489 influence local microhabitats because of their high specificity for organics. In contrast, there are still  
490 some populations which are scarcely reported. For example, Sva0996 marine group, an actinobacterial  
491 group, is retrieved occasionally from marine sediments and upper ocean (Bano and Hollibaugh, 2002;  
492 Wang et al., 2018). Orsi et al. (2016) first found this group prefers to free-living lifestyle in upper  
493 seawater and have the ability to assimilate phytoplankton-derived dissolved protein. Our present  
494 results suggest that Sva0996 group are flexible to adapt PA or FL lifestyles at the surface seawater  
495 because two lifestyles occur concurrently. Moreover, the distribution of Sva0996 group is not  
496 restricted only in upper photic ocean, and they can survive in meso- and bathypelagic seawaters with  
497 the significant preference for free-living lifestyle (odds ratio for FL-preference is up to 3.93).  
498 However, nothing is available to elaborate the selection between PA and FL lifestyles due to lack of  
499 pure culture or their genome information.

500 A high proportion of bacterial lineages are revealed to co-occur in both PA and FL fractions. At OTU  
501 level, more than 1/3 of total OTU numbers (2402 out of 6964 OTUs) are shared by PA and FL  
502 fractions (Fig. 9). Phylogenetically, these PA/FL-shared OTUs are mainly fallen into  $\alpha$ -,  $\gamma$ -,  $\delta$ -  
503 *Proteobacteria*, *Planctomycetes*, *Bacteroidetes* and *Actinobacteria*. Moreover, taxonomic components  
504 of PA/FL-shared OTUs at different levels are primarily similar to those of OTUs retrieved exclusively  
505 from PA fractions or FL fractions (Table S1, Fig. 9), indicating that a considerable amount of bacterial  
506 lineages potentially have PA and FL dual lifestyle strategies (Bauer et al., 2006; Gonzalez et al., 2008).  
507 On the one hand, a few lineages such as *Flavobacteriaceae*, *Planctomycetaceae*, *Rhodobacteraceae*,  
508 *Erythrobacteraceae*, *Burkholderiaceae*, *Nitrospinaceae*, SAR324 clade, *Alteromonadaceae*,  
509 *Pseudomonadaceae* and *Salinisphaeraceae* co-occur in PA and FL fractions at least at one of the same  
510 depths with approximately equivalent abundances. In such cases, their odds ratios are close to zero or  
511 minor range, indicating that bacteria are able to employ two different survival strategies at the same  
512 time. On the other hand, some taxa including the families Sva0996 marine group, *Flavobacteriaceae*,  
513 *Phycisphaeraceae*, *Rhodobacteraceae* *Methylobacteriaceae*, *Erythrobacteraceae*,  
514 *Pseudoalteromonadaceae*, *Halomonadaceae* and *Moraxellaceae*, show divergent preferences to PA or  
515 FL lifestyles at different depths or different locations. This is clearly evident by the shift or conversion  
516 of their odds ratios at different depths along the vertical profiles of water column (Fig. 9), indicative of  
517 their different adaption tactics to different environments. One possible explanation is that most of the  
518 marine bacteria are generalists with dual life strategies (Bauer et al., 2006; Gonzalez et al., 2008), and

519 able to grow in suspension as well as on particles (Lee et al., 2004; Grossart et al., 2006, 2010). For  
520 instance, PA bacteria must be capable of surviving freely in the water column to migrate and colonize  
521 new organic particles (Ghiglione et al., 2007; Crespo et al., 2013). Bacterial populations may switch  
522 their lifestyles between free-living and particle-attachment, depending on substrate availability and the  
523 surrounding chemical triggers (Grossart, 2010; D'Ambrosio et al., 2014). To date, one exception, the  
524 genus *Scalindua* in the *Planctomycetes* phylum, which is a known marine chemoautotroph involved in  
525 anammox, is exclusively observed in FL fractions in previous studies (Fuchsman et al., 2012; Ganesh  
526 et al., 2014; Suter et al., 2018). However, it is absent from our water columns.

#### 527 **4.4 Archaeal community preferences to PA and FL lifestyles**

528 Samples of PA and FL archaeal fractions were also separated into different groups by statistical  
529 analysis (Fig. 3b), indicating their phylogenetically different community structures. However, because  
530 most of OTUs belonged to uncultured archaeon, it is impossible to assign them into taxonomic  
531 lineages at finer level. Thus, the distinction of archaeal population compositions between PA and FL  
532 fractions was unnoticeable (Fig. 7). The MGI and MGII are the most abundant taxa in both PA and FL  
533 archaeal fractions. The MGI thaumarchaea are one of the most abundant and cosmopolitan  
534 chemolithoautotrophs in the dark ocean (Karner et al., 2001) and responsible for much of the ammonia  
535 oxidation in this environment for their common metabolism of aerobic ammonia oxidation.  
536 Corresponding to their autotrophic metabolism, MGI generally exhibit free-living preference and are  
537 the prevalent archaeal taxa in free-living fractions below euphotic zone (Smith et al., 2013; Salazar et  
538 al., 2015; Tarn et al., 2016). However, different from our results, a few studies showed that MGI  
539 dominated both the PA and FL archaeal populations and no obvious distinction was observed in  
540 abundance and ecotype of MGI (Eloe et al., 2011; Jin et al., 2018). To date, only a few pure cultures of  
541 marine MGI, small rods with a diameter of 0.15~0.26  $\mu\text{m}$  and a length of 0.5 ~ 1.59  $\mu\text{m}$  and no  
542 flagella were observed (Könneke et al., 2005; Qin et al., 2014), suggesting that their occurrence in PA  
543 fraction is not caused by pore size of filter to fractionate different assemblages. One possibility is that  
544 decomposition of organic particles continuously releases ammonia and MGI can easily acquire high  
545 concentrations of ammonia by attaching to particles, especially in oligotrophic area. Recent studies  
546 provide another explanation to particle-attached MGI that some MGI cultures are obligate mixotrophy  
547 that rely on uptake and assimilation of organic compounds (Alonso-Sáez et al., 2012; Qin et al., 2014).  
548 In such case, PA lifestyle is in favor of their nutrient requirements. MGII have a wide distribution in  
549 the open ocean and as shown in our results, they are the dominant archaeal community generally  
550 within the upper euphotic zone (Massana et al., 2000; Martin-Cuadrado et al., 2015). Recently, they  
551 have been found, however, to be also abundant in deep-sea waters (Baker et al., 2013; Tarn et al.,  
552 2016; Liu et al., 2018a), showing a wider adaption to diverse marine habitats in addition to the photic  
553 zone. MGII are thought to be heterotrophs, and have the ability of degrading proteins and lipids  
554 (Iverson et al., 2012; Orsi et al., 2015). Metagenomes revealed a number of genes encoding cell  
555 adhesion, degradation of high molecular weight organic matter and photoheterotrophy (Rinke et al.,  
556 2019; Tully et al., 2019), evidencing their potentiality to utilize organic particles as important growth  
557 substrates. All these findings imply MGII's preference to particle-attached lifestyle, and they are  
558 frequently detected from PA fractions in size-fractionated studies (Iverson et al., 2012; Orsi et al.,  
559 2015; Tran et al., 2016). However, in a few studies including our present study, MGII are also  
560 identified as the dominant archaeal components from FL fractions, with equal or even more abundance

561 than PA fractions (Fig. 7). Further studies confirm that genome contents and populations of free-living  
562 MGII are distinct from those of particle-attached MGII (Orsi et al., 2015; Rinke et al., 2019),  
563 suggesting their metabolic evolution and adjustment to niche partitioning. In addition, MGIII also  
564 occurred commonly in both fractions (Fig. 7). MGIII are usually retrieved as minor components of  
565 deep mesopelagic and bathypelagic communities (Galand et al., 2009; Tarn et al., 2016). Like MGII,  
566 to date no cultured representative of MGIII leads to little is known about their ecological and  
567 physiological characteristics. Function prediction from metagenomes suggest that MGIII are aerobic  
568 (or facultative anaerobic), motile, and heterotrophic, and potentially can utilize lipid, proteins and  
569 polysaccharides as major energy source (Martin-Cuadrado et al., 2008; Haro-Moreno et al., 2017).  
570 Recently, a novel lineage of MGIII genomes preferring to live in the photic zone was recovered,  
571 consistent with previous few studies and our present results in which MGIII populations are obtained  
572 from the euphotic zone with a considerable abundance (Galand et al., 2009, 2010). Moreover, recent  
573 findings also indicate that MGIII are inclined to be attached to other microorganisms (particle-attached  
574 preference) and only sporadically be released to the surrounding environments (free-living lifestyle)  
575 (Haro-Moreno et al., 2017).

576 In addition, there are several other archaeal lineages with remarkable differences in abundance  
577 between PA and FL fractions. The order *Methanosarcinales* and *Methanobacteriales*, affiliated to the  
578 phylum *Euryarchaeota* and retrieved exclusively from PA fractions (Fig. 7), belong to strictly  
579 anaerobic methanogens. Their preference to particle-attached lifestyle in water column environments  
580 is intelligibly convinced. Within normal water column, seawater is oxic in spite of low oxygen  
581 concentration and only on or inside the particles where heterotrophic microbes attach and digest  
582 organic matter using oxygen as electron acceptor, local anoxic niches are developed with the  
583 exhaustion of ambient oxygen and become suitable for the survival of methanogens. Members of the  
584 *Woesearchaeota* were abundantly derived from the PA fraction of the upper seawater. In marine  
585 environments, *Woesearchaeota* are distributed restrictively in marine sediments (Lipsewers et al.,  
586 2018) or deep-sea hydrothermal vents (Takai et al., 1999), and are scarcely detected from pelagic  
587 seawater masses. Recent studies suggest that woesearchaeotal lineages are mostly retrieved from  
588 anoxic environments (Castelle et al., 2015; Liu et al., 2018b). Moreover, genomic metabolic analysis  
589 indicates *Woesearchaeota* have an anaerobic heterotrophic lifestyle with conspicuous metabolic  
590 deficiencies (Probst et al., 2017; Liu et al., 2018b), implying a potential syntrophic or mutualistic  
591 partnership with other organisms (Castelle et al., 2015; Liu et al., 2018b). It is further demonstrated  
592 that *Woesearchaeota* tend to co-occur with typical anaerobic methanogens from the *Methanomicrobia*  
593 and *Methanobacteria* constituting a potential consortia (Liu et al., 2018b). In our present results, at  
594 several depths, the *Methanosarcinales* of the *Methanomicrobia* and the *Methanobacteriales* of the  
595 *Methanobacteria*, together with *Woesearchaeota*, were detected concurrently, implying to a large  
596 extent their potential syntrophic partnership.

#### 597 **4.5 Potential vertical connectivity of microbial populations along the depth profile**

598 Microbial distribution at different depths to a certain extent implicates their potential vertical  
599 connectivity along the water column profile. It has been suggested that the sinking of organic particles  
600 formed in upper euphotic zone is a main vector in transferring prokaryotes from the surficial ocean to  
601 deep waters (Mestre et al., 2018). Those surficial lineages, usually belonging to putative



602 photosynthetic/photoheterotrophic, Bchl a-containing microorganism or strict epipelagic/euphotic  
603 inhabitants, are reliable indicators to hint their downward transportation if they are detected from  
604 meso- or bathypelagic waters. For example, cyanobacteria are typical photosynthetic bacteria and their  
605 distribution is thought to be confined to the euphotic zone, with commonly observed maximum depths  
606 of about 150 ~ 200 m. In the present study, however, cyanobacterial lineages were retrieved  
607 throughout the whole water column (Fig. 5 and Fig. 6), especially at 4,000 m depth where  
608 cyanobacteria account for nearly 12% of the PA communities. Although a recent study revealed that  
609 cyanobacteria can dominate the deep continental subsurface microbial communities with the potential  
610 for a hydrogen-based lithoautotrophic metabolism instead of photosynthesis (Puente-Sanchez et al.,  
611 2018), these indigenous deep cyanobacteria were classified into the genera *Calothrix*, *Microcoleus* and  
612 *Chroococidiopsis*, phylogenetically different from those prevailing in our study (*Prochlorococcus*,  
613 *Synechococcus*). Jiao et al. (2014) observed substantial *Prochlorococcus* populations at 1,500 m depth  
614 in the South China Sea, and suggested that multiple physical processes, including internal solitary  
615 waves and mesoscale eddies were responsible for the occurrence of these “deep *Prochlorococcus*”.  
616 However, in our study area, ages of seawater increase gradually from the surface to the deep along the  
617 water column profile in a normal time sequence (Table 1), refuting this possibility. Thus, a reasonable  
618 postulation here is that the sinking particles function as vectors and convey cyanobacteria attaching on  
619 particle surfaces from epipelagic zone into deep-sea waters. Likewise, members of the family  
620 *Erythrobacteraceae*, which are largely represented by OTUs within the genus *Erythrobacter*, are also  
621 present abundantly in both PA and FL fractions at 4,000 m depth (Fig. 6). *Erythrobacter* spp. belong to  
622 putative Bchl a-containing, aerobic anoxygenic photoheterotrophic bacteria and are thought to be  
623 distributed only in the euphotic upper ocean (Kolber et al., 2000; Koblížek et al., 2003). SAR11 clade,  
624 are potentially photoheterotrophic (Gomez-Pereira et al., 2013; Evans et al., 2015) and ubiquitous in  
625 global photic zones as one of the most abundant bacteria (Morris et al., 2002). We observed that  
626 members of SAR11 clade are distributed across the whole water columns, especially in mesopelagic  
627 aphotic depths with relatively high proportions. Other lineages specializing in inhabiting surface  
628 seawater but was also retrieved from the deep ocean include  $\gamma$ -proteobacterial SAR86 clade, SAR116  
629 clade of marine *Roseobacter* and SAR202 clade within *Chloroflexi*. The majority of the OTUs within  
630 these “surface lineages” have been retrieved from the meso-/bathypelagic ocean and can be traced  
631 back simultaneously to those present in surface waters, suggesting their potential origin from the upper  
632 epipelagic zones.

## 633 5. Conclusions

634 In this study, we systematically compared bacterial and archaeal community structures within two  
635 different filtration fractions representing particle-attached and free-living lifestyles at different depths  
636 in the South China Sea. As revealed in previous studies, whatever bacteria or archaea, the FL fractions  
637 usually show higher cell abundance and diversity than their PA counterparts at most depths. A set of  
638 environmental factors including depth, salinity, seawater age, DOC, POC, DO and silicate are  
639 considered playing important roles in structuring PA and FL microbial communities along the depth  
640 profile. On the one hand, as the result of adapting to different organic substrates available, PA and FL  
641 fractions generally accommodate significantly divergent microbial compositions at each depth. At fine  
642 taxonomic levels, a considerable number of microbial lineages exhibit pronounced preferences to PA  
643 or FL lifestyles, also with distinct distributing stratification along the depth profile. A few microbial

644 taxa show potentially PA and FL dual lifestyle strategies, able to switch according to substrate  
645 availability an environmental variation and implying versatile metabolic flexibility. In addition,  
646 according to some special microbial lineages supposed to be restricted in upper euphotic zones, we  
647 found that the sinking organic particles likely function as vectors to transfer prokaryotes from surficial  
648 ocean to deep waters, indicative of the potential vertical connectivity of prokaryotes along water  
649 column profile.

650

#### 651 **Data availability**

652 The pyrosequencing data obtained from the 454 sequencing of 16S rRNA genes were deposited in the  
653 Sequence Read Archive (SRA) database under accession ID PRJNA546072 for bacterial sequences  
654 and PRJNA546071 for archaeal sequences.

655

#### 656 **Author contribution**

657 JL and JF designed the experiments, and JL, LG, JW and BW carried them out. JL, SB, LZ and LS  
658 treated and analyzed the sequence data. JL and JF wrote the manuscript with contributions from all co-  
659 authors.

660

#### 661 **Acknowledgements**

662 This work was financially supported by the National Natural Science Foundation of China (NSFC, No.  
663 41373071 and No. 91951210) and National Key R&D Program of China (No. 2018YFC0310600).

664

#### 665 **Competing interests**

666 The authors declare that they have no conflict of interest.

667 **References**

- 668 Acinas, S.G., Rodríguez-Valera, F., Pedrós-Alió, C.: Spatial and temporal variation in marine bacterioplankton  
669 diversity as shown by RFLP fingerprinting of PCR amplified 16S rDNA, *FEMS Microbiol. Ecol.*, 24, 27-  
670 40, 1997.
- 671 Alldredge, A.L., Cole, J.J. and Caron, D.A.: Production of heterotrophic bacteria inhabiting macroscopic  
672 organic aggregates (marine snow) from surface waters, *Limnol. Oceanogr.*, 31, 68-78, 1986.
- 673 Alonso-Sáez, L., Waller, A.S., Mende, D.R., Bakker, K., Farnelid, H., Yager, P.L., Lovejoy, C., Tremblay, J.-  
674 É., Potvin, M., Heinrich, F., Estrada, M., Riemann, L., Bork, P., Pedrós-Alió, C. and Bertilsson, S.: Role for  
675 urea in nitrification by polar marine Archaea, *Proc. Natl. Acad. Sci. USA.*, 109, 17989-17994,  
676 10.1073/pnas.1201914109, 2012.
- 677 Arístegui, J., Gasol, J.M., Duarte, C.M., Herndl, G.J.: Microbial oceanography of the dark ocean's pelagic  
678 realm, *Limnology and Oceanography*, 54, 1501-529, 2009.
- 679 Azam, F., and Malfatti, F.: Microbial structuring of marine ecosystems, *Nature Rev. Microbiol.*, 5, 782-791,  
680 2009.
- 681 Baker, B.J., Sheik, C.S., Taylor, C.A., Jain, S., Bhasi, A., Cavalcoli, J.D., Dick, G.J.: Community  
682 transcriptomic assembly reveals microbes that contribute to deep-sea carbon and nitrogen cycling, *ISME J.*,  
683 7, 1962-973, 10.1038/ismej.2013.85, 2013.
- 684 Bano, N., and Hollibaugh, J.T.: Phylogenetic composition of bacterioplankton assemblages from the Arctic  
685 Ocean, *Appl. Environ. Microbiol.*, 68, 505-518, 2002.
- 686 Bano, N., Ruffin, S., Ransom, B., and Hollibaugh, J.T.: Phylogenetic composition of Arctic Ocean archaeal  
687 assemblages and comparison with antarctic assemblages, *Appl. Environ. Microbiol.*, 70, 781-789, 2004.
- 688 Bauer, M., Kube, M., Teeling, H., Richter, M., Lombardot, T., Allers, E., Wurdemann, C.A., Quast, C., Kuhl,  
689 H., Knaust, F., Woebken, D., Bischof, K., Mussmann, M., Choudhuri, J.V., Meyer, F., Reinhardt, R., Amann,  
690 R.I., and Glockner, F.O.: Whole genome analysis of the marine Bacteroidetes '*Gramella forsetii*' reveals  
691 adaptations to degradation of polymeric organic matter, *Environ. Microbiol.*, 8, 2201-2213, 2006.
- 692 Cammen, L.M., and Walker, J.A.: Distribution and activity of attached and free-living suspended bacteria in  
693 the bay of fundy, *Canadian Journal of Fisheries and Aquatic Sciences*, 39(12), 1655-1663, 1982.
- 694 Caron, D.A., Davis, P.G., Madon, L.P., and Sieburth, J.M.: Heterotrophic bacteria and bacterivorous protozoa  
695 in oceanic macroaggregates, *Science*, 218, 795-797, 1982.
- 696 Castelle, C., Wrighton, K., Thomas, B., Hug, L., Brown, C., Wilkins, M., Frischkorn, K.R., Tringe, S.G., Singh,  
697 A., Markillie, L.M., Taylor, R.C., Williams, K.H. and Banfield, J.F.: Genomic expansion of domain archaea  
698 highlights roles for organisms from new phyla in anaerobic carbon cycling, *Current Biology*, 25(6), 690-  
699 701, 2015.
- 700 Chen, W., Cai, P., Dai, M., Wei, J.:  $^{234}\text{Th}/^{238}\text{U}$  disequilibrium and particulate organic carbon export in the  
701 northern South China Sea, *Journal of Oceanography*, 64, 417-428, 2008.
- 702 Chen, Y.L., Chen, H.Y., Karl, D.M., Takahashi, M.: Nitrogen modulates phytoplankton growth in spring in the  
703 South China Sea, *Cont. Shelf Res.*, 24, 527-541, 2004.
- 704 Cram, J.A., Weber, T., Leung, S.W., McDonnell, A.M.P., Liang, J.H., Deutsch, C.: The role of particle size,  
705 ballast, temperature, and oxygen in the sinking flux to the deep sea, *Global Biogeochemical Cycles*, 32(5),  
706 858-876, 2018.
- 707 Crespo, B.G., Pommier, T., Fernandez-Gomez, B., and Pedros-Alio, C.: Taxonomic composition of the particle-  
708 attached and free-living bacterial assemblages in the Northwest Mediterranean Sea analyzed by  
709 pyrosequencing of the 16S rRNA, *MicrobiologyOpen*, 2, 541-552, 2013.
- 710 Crump, B.C., Baross, J.A., and Simenstad, C.A.: Dominance of particle-attached bacteria in the Columbia

711 River estuary, USA., *Aquat. Microbial. Ecol.*, 14, 7-18, 1998.

712 D'Ambrosio, L., Ziervogel, K., MacGregor, B., Teske, A., and Arnosti, C.: Composition and enzymatic  
713 function of particle-associated and free-living bacteria: a coastal/offshore comparison, *ISME J.*, 8, 2167-  
714 2179, doi:10.1038/ismej.2014.67, 2014.

715 Dang, H.Y., Chen, R.P., Wang, L., Shao, S.D., Dai, L.Q., Ye, Y., Guo, L., Huang, G., and Klotz, M.G.:  
716 Molecular characterization of putative biocorroding microbiota with a novel niche detection of epsilon- and  
717 zetaproteobacteria in Pacific Ocean coastal seawaters, *Environ. Microbiol.*, 13(11), 3059-3074, 2011.

718 DeLong, E.F., Franks, D.G., and Alldredge, A.L.: Phylogenetic diversity of aggregate-attached vs. free-living  
719 marine bacterial assemblages, *Limnol. Oceanogr.*, 38, 924-934, 1993.

720 Dilly, O., Bloem, J., Vos, A., Munch, J.C.: Bacterial diversity in agricultural soils during litter decomposition,  
721 *Appl. Environ. Microbiol.*, 70, 468-474, 2004.

722 Doxaran, D., Ehn, J., Bélanger, S., Matsuoka, A., Hooker, S., Babin M.: Optical characterisation of suspended  
723 particles in the Mackenzie River plume (Canadian Arctic Ocean) and implications for ocean colour remote  
724 sensing, *Biogeosciences*, 9, 3213-3229, 10.5194/bg-9-3213-2012, 2012.

725 Eloë, E.A., Shulse, C.N., Fadrosch, D.W., Williamson, S.J., Allen, E.E., and Bartlett, D.H.: Compositional  
726 differences in particle-associated and free-living microbial assemblages from an extreme deep-ocean  
727 environment, *Environ. Microbiol. Rep.*, 3, 449-458, 2011.

728 Evans, P.N., Parks, D.H., Chadwick, G.L., Robbins, S.J., Orphan, V.J., and Golding, S.D., Tyson, G.W.:  
729 Methane metabolism in the archaeal phylum bathyarchaeota revealed by genome-centric metagenomics,  
730 *Science*, 350, 434-438, 2015.

731 Fuchsman, C.A., Staley, J.T., Oakley, B.B., Kirkpatrick, J.B., and Murray, J.W.: Free-living and aggregate-  
732 associated Planctomycetes in the Black Sea, *FEMS Microbiol. Ecol.*, 80, 402-416, 2012.

733 Fuhrman, J.A., and Davis, A.A.: Widespread Archaea and novel Bacteria from the deep sea as shown by 16S  
734 rRNA gene sequences, *Marine Ecol. Prog. Series*, 150, 275-285, 1997.

735 Galand, P.E., Casamayor, E.O., Kirchman, D.L., Potvin, M., Lovejoy, C.: Unique archaeal assemblages in the  
736 Arctic Ocean unveiled by massively parallel tag sequencing, *ISME J.*, 3, 860-869, 2009.

737 Galand, P.E., Gutiérrez-Provecho, C., Massana, R., Gasol, J.M., & Casamayor, E.O.: Inter-annual recurrence  
738 of archaeal assemblages in the coastal NW Mediterranean Sea (Blanes Bay microbial observatory),  
739 *Limnology & Oceanography*, 55(5), 2117-2125, 2010.

740 Galand, P.E., Lovejoy, C., Pouliot, J., Vincent, W.F.: Heterogeneous archaeal communities in the particle rich  
741 environment of an arctic shelf ecosystem, *J. Mar. Syst.*, 74, 774-782, 2008.

742 Garneau, M.È., Vincent, W.F., Terrado, R., Lovejoy, C.: Importance of particle-associated bacterial  
743 heterotrophy in a coastal Arctic ecosystem, *J. Mar. Syst.*, 75, 185-197, 2009.

744 Ganesh, S., Parris, D.J., DeLong, E.F., Stewart, F.J.: Metagenomic analysis of size-fractionated picoplankton  
745 in a marine oxygen minimum zone, *ISME J.*, 8, 187-211, 10.1038/ismej.2013.144, 2014.

746 Ghai, R., Mizuno, C.M., Picazo, A., Camacho, A., Rodriguez-Valera, F.: Metagenomics uncovers a new group  
747 of low GC and ultra-small marine Actinobacteria, *Sci. Rep.*, 3, 2471, doi:10.1038/srep02471, 2013.

748 Ghiglione, J.F., Conan, P., and Pujo-Pay, M.: Diversity of total and active free-living vs. particle-attached  
749 bacteria in the euphotic zone of the NW Mediterranean Sea, *FEMS Microbiol. Lett.*, 299, 9-21, 2009.

750 Ghiglione, J.F., Mevel, G., Pujo-Pay, M., Mousseau, L., Lebaron, P., and Goutx, M.: Diel and seasonal  
751 variations in abundance, activity, and community structure of particle-attached and free-living bacteria in  
752 NW Mediterranean Sea, *Microbial Ecology*, 54, 217-231, 2007.

753 Giovannoni, S.J., Cameron, Thrash J., Temperton, B.: Implications of streamlining theory for microbial  
754 ecology, *ISME J.*, 8, 1553-1565, doi:10.1038/ismej.2014.60, 2014.

755 Giovannoni, S.J. and Stingl, U.: Molecular diversity and ecology of microbial plankton, *Nature*, 437, 343-348,

756 10.1038/nature04158, 2005.

757 Gómez-Pereira, P.R., Kennaway, G., Fuchs, B.M., Tarran, G.A., and Zubkov, M.V.: Flow cytometric  
758 identification of Mamiellales clade II in the Southern Atlantic Ocean, *FEMS Microbiol. Ecol.*, 83, 664-671,  
759 2013.

760 Gong, G.C., Liu, K.K., Liu, C.T., Pai, S.C.: The chemical hydrography of the South China Sea west of Luzon  
761 and a comparison with the West Philippine Sea, *Terr. Atmos. Ocean Sci.*, 3, 587-602, 1992.

762 Gonzalez, J.M., Fernandez-Gomez, B., Fernandez-Guerra, A., Gomez-Consarnau, L., Sanchez, O., Coll-Llado,  
763 M.: Genome analysis of the proteorhodopsin-containing marine bacterium *Polaribacter* sp. MED152  
764 (Flavobacteria), *Proc. Natl. Acad. Sci. USA*, 105, 8724-8729, 2008.

765 Green, P.N.: *Methylobacterium*, In: *The Prokaryotes: A Handbook on the Biology of Bacteria*, edited by:  
766 Dworkin, M., Falkow, S., Rosenberg, E., Schleifer, K.H., and Stackebrandt, E., Springer, New York, 5,  
767 257-265, 2006.

768 Griffith, P., Shiah, F., Gloersen, K., Ducklow, H.W., Fletcher, M.: Activity and distribution of attached bacteria  
769 in Chesapeake Bay, *Mar. Ecol. Prog. Ser.*, 108, 1-10, 1994.

770 Grossart, H.P.: Ecological consequences of bacterioplankton lifestyles: changes in concepts are needed,  
771 *Environ. Microb. Rep.*, 2, 706-714, 2010.

772 Grossart, H.P., Kiorboe, T., Tang, K., Allgaier, M., Yam, E.M., Ploug, H.: Interactions between marine snow  
773 and heterotrophic bacteria: aggregate formation and microbial dynamics, *Aqua. Microb. Ecol.*, 42, 19-26,  
774 2006.

775 Grossart, H.-P., Tang, K.W., Kiørboe, T., and Ploug, H. Comparison of cell-specific activity between free-  
776 living and attached bacteria using isolates and natural assemblages, *FEMS Microbiol. Lett.*, 266, 194-200,  
777 2007.

778 Grote, J., Thrash, J.C., Huggett, M.J., Landry, Z.C., Carini, P., Giovannoni, S.J., and Rappé, M.S.: Streamlining  
779 and core genome conservation among highly divergent members of the SAR11 clade, *mBio*, 3, e00252-12,  
780 doi:10.1128/mBio.00252-12, 2012.

781 Haro-Moreno, J.M., Rodriguez-Valera, F., López-García, Purificación, Moreira, D., and Martin-Cuadrado,  
782 A.B.: New insights into marine group III Euryarchaeota, from dark to light. *The ISME Journal*, 11, 1102-  
783 1117, 2017.

784 Hollibaugh, J.T., Wong, P.S., and Murrell, M.C.: Similarity of particle-associated and free-living bacterial  
785 communities in northern San Francisco Bay, California, *Aquat. Microb. Ecol.*, 21, 103-114, 2000.

786 Huang, Y.N., Chen, F.J., Zhao, H., Zeng, Z., and Chen, J.F. Concentration distribution and structural features  
787 of nutrients in the northwest of South China Sea in winter 2012, *Journal of Applied Oceanography*, 34, 310-  
788 316, 2015.

789 Iverson, V., Morris, R.M., Frazar, C.D., Berthiaume, C.T., Morales, R.L., Armbrust, E.V.: Untangling genomes  
790 from metagenomes: revealing an uncultured class of marine Euryarchaeota, *Science*, 335, 587-590, 2012.

791 Jiao, N., Luo, T., Zhang, R., Yan, W., Lin, Y., Johnson, Z.I., Tian, J., Yuan, D., Yang, Q., Zheng, Q., Sun, J.,  
792 Hu, D., and Wang, P.: Presence of *Prochlorococcus* in the aphotic waters of the western Pacific Ocean,  
793 *Biogeosciences*, 11, 2391-2400, 2014.

794 Karner, M.B., DeLong, E.F., Karl, D.M.: Archaeal dominance in the mesopelagic zone of the Pacific Ocean,  
795 *Nature*, 409, 507-510, 2001.

796 Karner, M. and Herndl, G.J.: Extracellular enzymatic activity and secondary production in free-living and  
797 marine-snow-associated bacteria, *Marine Biology*, 113, 341-347, 1992.

798 Kiorboe, T., and Jackson, G.A.: Marine snow, organic solute plumes, and optimal chemosensory behavior of  
799 bacteria, *Limnol. Oceanogr.*, 46, 1309-1318, 2001.

800 Koblížek, M., Bějá, O., Bidigare, R.R., Christensen, S., Benitez-Nelson, B., Vetriani, C., Kolber, M.K.,

801 Falkowski, P.G. and Kolber, Z.S.: Isolation and characterization of *Erythrobacter* sp. strains from the upper  
802 ocean, Arch. Microbiol., 180, 327-338, <https://doi.org/10.1007/s00203-003-0596-6>, 2003.

803 Kolber, Z.S., Van Dover, C.L., Niederman, R.A., Falkowski, P.G.: Bacterial photosynthesis in surface waters  
804 of the open ocean, Nature, 407, 177-179, 2000.

805 Könneke M, Bernhard, A.E., de la Torre, J.R., Walker, C.B., Waterbury, J.B. and Stahl, D.A.: Isolation of an  
806 autotrophic ammonia-oxidizing marine archaeon, Nature, 437, 543-546, 2005.

807 Laufkötter, C., John, J. G., Stock, C.A., and Dunne, J.P.: Temperature and oxygen dependence of the  
808 remineralization of organic matter, Global Biogeochemical Cycles, 31, 1038-1050, 2017.

809 Lee, C., Wakeham, S., Arnosti, C.: Particulate organic matter in the sea: the composition conundrum, Ambio.,  
810 33, 566-575, 2004.

811 Lee, Z.M.-P., Bussema, C., and Schmidt, T.M.: rrnDB: documenting the number of rRNA and tRNA genes in  
812 bacteria and archaea, Nucleic. Acids Res., 37, 489-493, 2009.

813 Li, J., Wei, B., Wang, J., Liu, Y., Dasgupta, S., Zhang, L.: Variation in abundance and community structure of  
814 particle-attached and free-living bacteria in the South China Sea, Deep Sea Res. Part II Top. Stud. Oceanogr.,  
815 122, 64-73, [10.1016/j.dsr2.2015.07.006](https://doi.org/10.1016/j.dsr2.2015.07.006), 2015.

816 Lipsewers, Y.A., Hopmans, E.C., Sinninghe Damsté, J.S., and Villanueva, L.: Potential recycling of  
817 thaumarchaeotal lipids by DPANN Archaea in seasonally hypoxic surface marine sediments, Organic  
818 Geochemistry, 119, 101- 109, 2018.

819 Liu, R.L., Wang, L., Liu, Q.F., Wang, Z.X., Li, Z.Z., and Fang, J.S.: Depth-resolved distribution of particle-  
820 attached and free-living bacterial communities in the water column of the New Britain Trench. Frontiers in  
821 Microbiology, 9, 625, 2018a.

822 Liu, X., Li, M., Castelle, C. J., Probst, A. J., Zhou, Z., & Pan, J.: Insights into the ecology, evolution, and  
823 metabolism of the widespread woesearchaeotal lineages, Microbiome, 6(1), 102, 2018b.

824 Liu, S., Riesen, A., and Liu, Z.: Differentiating the role of different-sized microorganisms in peptide  
825 decomposition during incubations using size-fractionated coastal seawater, Journal of Experimental Marine  
826 Biology and Ecology, 472, 97-106, 2015.

827 Long, R.A., and Azam, F.: Microscale patchiness of bacterioplankton assemblage richness in seawater, Aquatic  
828 Microbial Ecology, 26, 103-113, doi: 10.3354/ame026103, 2001.

829 Martin-Cuadrado, A.-B., Garcia-Heredia, I., Moltó, A.G., López-Úbeda, R., Kimes, N., López-García, P.,  
830 Moreira, D., Rodriguez-Valera, F.: A new class of marine euryarchaeota group II from the Mediterranean  
831 deep chlorophyll maximum, ISME J., 9, 1619-1634, doi:10.1038/ismej.2014.249, 2015.

832 Martin-Cuadrado, A.B., Rodriguez-Valera, F., Moreira, D., Alba, J.C., Ivars-Martinez, E., Henn, M.R.:  
833 Hindsight in the relative abundance, metabolic potential and genome dynamics of uncultivated marine  
834 archaea from comparative metagenomic analyses of bathypelagic plankton of different oceanic regions,  
835 ISME J., 2, 865-886, 2008.

836 Massana, R., Delong, E.F., and Pedros-Alio, C.: A few cosmopolitan phylotypes dominate planktonic archaeal  
837 assemblages in widely different oceanic provinces, Applied and Environmental Microbiology, 66(5), 1777-  
838 1787, 2000.

839 Meng, F., Dai, M., Cao, Z., Wu, K., Zhao, X., Li, X., Chen, J., and Gan, J.: Seasonal dynamics of dissolved  
840 organic carbon under complex circulation schemes on a large continental shelf: the northern South China  
841 Sea, Journal of Geophysical Research: Oceans, 122, 9415-9428, 2017.

842 Mestre, M., Ruiz-Gonzalez, C., Logares, R., Duarte, C.M., Gasol, J.M., and Sala, M.M.: Sinking particles  
843 promote vertical connectivity in the ocean microbiome, Proc. Natl. Acad. Sci. USA, 115, 6799-6807, 2018.

844 Mevel, G., Vernet, M., Goutx, M., and Ghiglione, J.F. Seasonal to hour variation scales in abundance and  
845 production of total and particle-attached bacteria in the open NW Mediterranean Sea (0-1000 m),

846 Biogeosciences, 5, 1573-1586, doi:10.5194/bg-5-1573-2008, 2008.

847 Milici, M., Deng, Z.L., Tomasch, J., Decelle, J., Wos-Oxley, M.L., Wang H., Jáuregui, R., Plumeier, I., Giebel,  
848 H.A., Badewien, T.H., Wurst, M., Pieper, D.H., Simon, M., Wagner-Döbler, I.: Co-occurrence analysis of  
849 microbial taxa in the Atlantic Ocean reveals high connectivity in the free-living bacterioplankton, *Front.*  
850 *Microbiol.*, 7, 649, 10.3389/fmicb.2016.00649, 2016.

851 Milici, M., Vital, M., Tomasch, J., Badewien, T.H., Giebel, H.A., Plumeier, I.: Diversity and community  
852 composition of particle-associated and free-living bacteria in mesopelagic and bathypelagic Southern Ocean  
853 water masses: evidence of dispersal limitation in the Bransfield Strait, *Limnol. Oceanogr.*, 62, 1080-1095,  
854 10.1002/lno.10487, 2017.

855 Mincer, T.J., Church, M.J., Taylor, L.T., Preston, C., Karl, D.M., DeLong, E.F.: Quantitative distribution of  
856 presumptive archaeal and bacterial nitrifiers in Monterey Bay and the North Pacific Subtropical Gyre,  
857 *Environ. Microbiol.*, 9, 1162-1175, 2007.

858 Mizuno, C.M., Rodriguezvalera, F., and Ghai, R.: Genomes of planktonic acidimicrobiales: widening horizons  
859 for marine actinobacteria by metagenomics, *mBio*, 6(1), e02083-14, 10.1128/mBio.02083-14, 2015.

860 Moeseneder, M.M., Winter, C., and Herndl, G.J.: Horizontal and vertical complexity of attached and free-  
861 living bacteria of the eastern Mediterranean Sea, determined by 16S rDNA and 16S rRNA fingerprints,  
862 *Limnol. Oceanogr.*, 46, 95-107, 2001.

863 Morris, S.A., Radajewski, S., Willison, T.W., Murrell, J.C.: Identification of the functionally active  
864 methanotroph population in a peat soil microcosm by stable-isotope probing, *Appl. Environ. Microbiol.*, 68,  
865 1446-1453, 2002.

866 Orsi, W.D., Smith, J.M., Wilcox, H.M., Swalwell, J.E., Carini, P., Worden, A.Z.: Ecophysiology of uncultivated  
867 marine euryarchaea is linked to particulate organic matter, *ISME J.*, 9, 1747-1763, 2015.

868 Ortega-Retuerta, E., Joux, F., Jeffrey, W.H., and Ghiglione, J.F.: Spatial variability of particle-attached and  
869 free-living bacterial diversity in surface waters from the Machenzie River to the Beaufort Sea (Canadian  
870 Arctic), *Biogeoscience*, 10, 2747-2759, 2013.

871 Peoples, L.M., Sierra, D., Oladayo, O., Qing, X., Alex, N., and Jessica, B.: Vertically distinct microbial  
872 communities in the Mariana and Kermadec Trenches, *PLOS ONE*, 13, e0195102, 2018.

873 Poretsky, R.S., Sun, S., Mou, X., and Moran, M.A.: Transporter genes expressed by coastal bacterioplankton  
874 in response to dissolved organic carbon, *Environ. Microbiol.*, 12, 616-627, 2010.

875 Probst, A.J., Castelle, C.J., Singh, A., Brown, C.T., Anantharaman, K., Sharon, I., Hug, L.A., Burstein, D.,  
876 Emerson, J.B., Thomas, B.C., Banfield, B.F.: Genomic resolution of a cold subsurface aquifer community  
877 provides metabolic insights for novel microbes adapted to high CO<sub>2</sub> concentrations, *Environ Microbiol.*, 19,  
878 459-74, 2017.

879 Puente-Sánchez, F., Arce-Rodríguez, A., Oggerin, M., García-Villadangos, M., Moreno-Paz, M., Blanco, Y.,  
880 Parro, V.: Viable cyanobacteria in the deep continental subsurface, *Proc. Natl. Acad. Sci. USA.*, 115(42),  
881 10702-10707, doi:10.1073/pnas.1808176115, 2018.

882 Qin, W., Amin, S.A., Martens-Habbena, W., Walker, C.B., Urakawa, H., Devol, A.H.: Marine ammonia-  
883 oxidizing archaeal isolates display obligate mixotrophy and wide ecotypic variation, *Proc. Natl. Acad. Sci.*  
884 *USA.*, 111, 12504-12509, 2014.

885 Rieck, A., Herlemann, D.P.R., Jürgens, K., and Grossart, H.-P.: Particle-associated differ from free-living  
886 bacteria in surface waters of the Baltic Sea, *Front. Microbiol.*, 6, 469, 2015.

887 Rinke, C., Rubino, F., Messer, L.F., Youssef, N., Parks, D.H., and Chuvochina, M., Brown, M., Jeffries, T.,  
888 Tyson, G.W., Seymour, J.R., Hugenholtz, P.: A phylogenomic and ecological analysis of the globally  
889 abundant Marine Group II archaea (*Ca. Poseidoniales* ord. nov.). *The ISME Journal*, 13, 663-675, 2019.

890 Rinta-Kanto, J.M., Sun, S., Sharma, S., Kiene, R.P., and Moran, M.A.: Bacterial community transcription

891 patterns during a marine phytoplankton bloom, *Environ. Microbiol.*, 14, 228-239, 2012.

892 Salazar, G., Cornejo-Castillo, F.M., Benítez-Barrios, V., Fraile-Nuez, E., Álvarez-Salgado, X.A., Duarte, C.M.,  
893 Gasol, J.M., Acinas, S.G.: Global diversity and biogeography of deep-sea pelagic prokaryotes, *ISME J.*, 10,  
894 596-608, 2016.

895 Salazar, G., Cornejo-Castillo, F.M., Borrull, E., Díez-Vives, C., Lara, E., Vaqué, D., Arrieta, J.M., Duarte,  
896 C.M., Gasol, J.M., Acinas, S.G.: Particle-association lifestyle is a phylogenetically conserved trait in  
897 bathypelagic prokaryotes, *Mol. Ecol.*, 24, 5692-5706, 2015.

898 Simon, M., Grossart, H.P., Schweitzer, B., and Ploug, H.: Microbial ecology of organic aggregates in aquatic  
899 ecosystems, *Aquat. Microb. Ecol.*, 28, 175-211, 2002.

900 Smith, D.C., Simon, M., Alldredge, A.L., and Azam, F.: Intense hydrolytic enzyme activity on marine  
901 aggregates and implications for rapid particle dissolution, *Nature*, 359, 139-142, 1992.

902 Smith, M.W., Allen, L.Z., Allen, A.E., Herfort, L., and Simon, H.M.: Contrasting genomic properties of free-  
903 living and particle-attached microbial assemblages within a coastal ecosystem, *Frontiers in Microbiology*,  
904 4, doi: 10.3389/fmicb.2013.00120, 2013.

905 Suter, E.A., Pachiadaki, M., Taylor, G.T., Astor, Y., and Edgcomb, V.P.: Free-living chemoautotrophic and  
906 particle-attached heterotrophic prokaryotes dominate microbial assemblages along a pelagic redox gradient,  
907 *Environ. Microbiol.*, 20, 693-712, 2018.

908 Suzuki, S., Kaneko, R., Kodama, T., Hashihama, F., Suwa, S., and Tanita, I., Furuya, K., Hamasaki, K.:  
909 Comparison of community structures between particle-associated and free-living prokaryotes in tropical and  
910 subtropical Pacific Ocean surface waters, *Journal of Oceanography*, 73(3), 383-395, 2017.

911 Takai, K., and Horikoshi, K.: Genetic diversity of archaea in deep-sea hydrothermal vent environments,  
912 *Genetics*, 152, 1285-1297, 1999.

913 Tarn, J., Peoples, L.M., Hardy, K., Cameron, J., Bartlett, D.H.: Identification of free-living and particle-  
914 associated microbial communities present in hadal regions of the Mariana Trench, *Front. Microbiol.*, 7, 665,  
915 doi:10.3389/fmicb.2016.00665, 2016.

916 Teeling, H., Fuchs, B.M., Becher, D., Klockow, C., Gardebrecht, A., et al.: Substrate-controlled succession of  
917 marine bacterioplankton populations induced by a phytoplankton bloom, *Science*, 336, 608-611, 2012.

918 Tully, B.J.: Metabolic diversity within the globally abundant Marine Group II Euryarchaea offers insight into  
919 ecological patterns, *Nat. Commun.*, 10, 271, <https://doi.org/10.1038/s41467-018-07840-4>, 2019.

920 Turley, C.M., and Mackie, P.J.: Biogeochemical significance of attached and free-living bacteria and the flux  
921 of particles in the NE Atlantic Ocean, *Mar. Ecol. Prog. Ser.*, 115, 191-203, doi:10.3354/meps115191, 1994.

922 Turley, C.M. and Stutt, E.D.: Depth-related cell-specific bacterial leucine incorporation rates on particles and  
923 its biogeochemical significance in the Northwest Mediterranean, *Limnol. Oceanogr.*, 45, 419-425,  
924 doi:10.4319/lo.2000.45.2.0419, 2000.

925 Varela, M.M., Vanaken, H.M., Sintès, E., Herndl, G.: Latitudinal trends of Crenarchaeota, and bacteria, in the  
926 meso- and bathypelagic water masses of the eastern north Atlantic, *Environ. Microbiol.*, 10, 110-124, 2008.

927 Wang, Y., Wang, B., Dann, L.M., Mitchell, J.G., Hu, X., and Tang, H., Zhang, H., Shen, Y.: Bacterial  
928 community structure in the Bohai Strait provides insights into organic matter niche partitioning, *Continental  
929 Shelf Research*, 169, 46-54, 2018.

930 Wright, T.D., Vergin, K.L., Boyd, P.W. and Giovannoni, S.J.: A novel delta-subdivision proteobacterial lineage  
931 from the lower ocean surface layer, *Appl. Environ. Microbiol.*, 63, 1441-1448, 1997.

932 Wu, J., Chung, S.W., Wen, L.S., Liu, K K., Chen, Y.L.L., and Chen, H.Y., Karl, D.M.: Dissolved inorganic  
933 phosphorus, dissolved iron, and trichodesmium in the oligotrophic South China Sea, *Global Biogeochemical  
934 Cycles*, 17(1), 8-1-8-10, 2003.

935 Yawata, Y., Cordero, O.X., Menolascina, F., Hehemann, J.-H., Polz, M.F., Stocker, R.: Competition-dispersal



936 tradeoff ecologically differentiates recently speciated marine bacterioplankton populations, *Proc. Natl. Acad.*  
937 *Sci. USA.*, 111, 5622-5627, doi:10.1073/pnas.1318943111, 2014.

938 Yilmaz, P., Yarza, P., Rapp, J.Z. and Glöckner, F.O.: Expanding the world of marine bacterial and archaeal  
939 clades, *Front. Microbiol.*, 6, 1524, doi: 10.3389/fmicb.2015.01524, 2016.

940 Yung, C.-M., Ward, C.S., Davis, K.M., Johnson, Z.I., Hunt, D.E.: Insensitivity of diverse and temporally  
941 variable particle-associated microbial communities to bulk seawater environmental parameters, *Appl.*  
942 *Environ. Microbiol.*, 82, 3431-3437, 2016.

943 Zhang, R., Liu, B., Lau, S.C.K., Ki, J.S., and Qian, P.: Particle-attached and free-living bacterial communities  
944 in a contrasting marine environment: Victoria Harbor, Hong Kong, *FEMS Microbiol. Ecol.*, 61, 496-508,  
945 2007.

946 Zhang, Y., Xiao, W., and Jiao, N.: Linking biochemical properties of particles to particle-attached and free-  
947 living bacterial community structure along the particle density gradient from freshwater to open ocean, *J.*  
948 *Geophys. Res.: Biogeosci.*, 121, 2261-2274, doi:10.1002/2016JG003390, 2016.

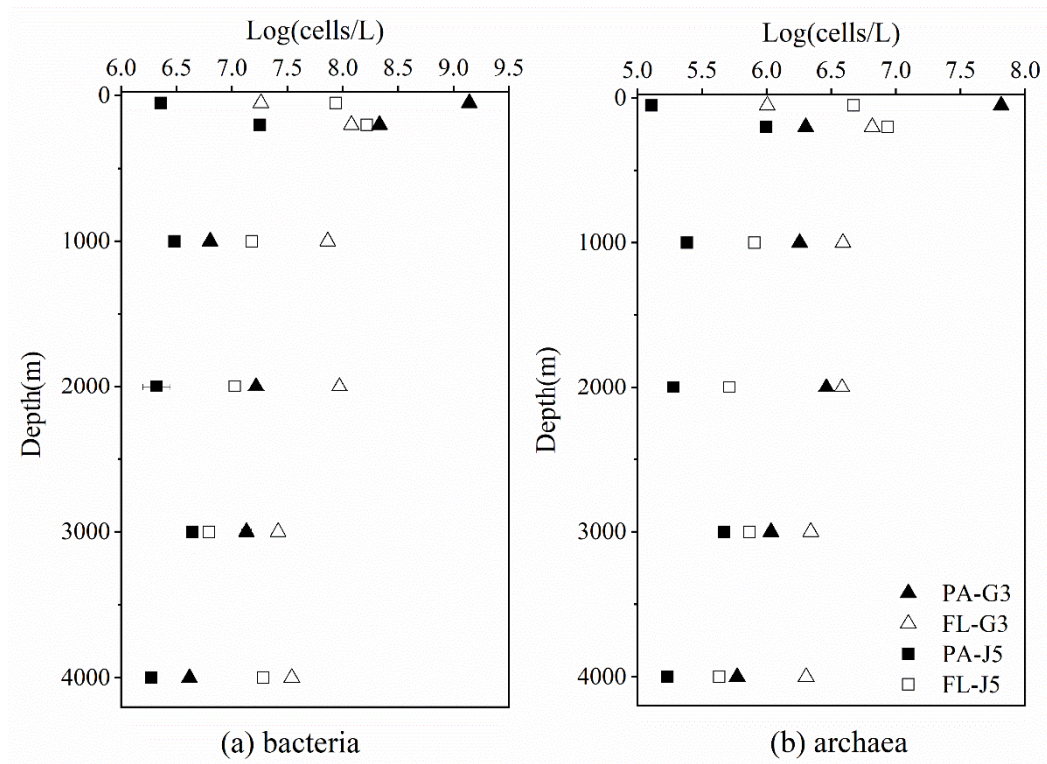

949

950 **Figure 1.** Bacterial and archaeal cell abundances in seawaters at different depths from G3  
 951 station and J5 station in the South China Sea, estimated from 16S rRNA gene copy  
 952 abundances.

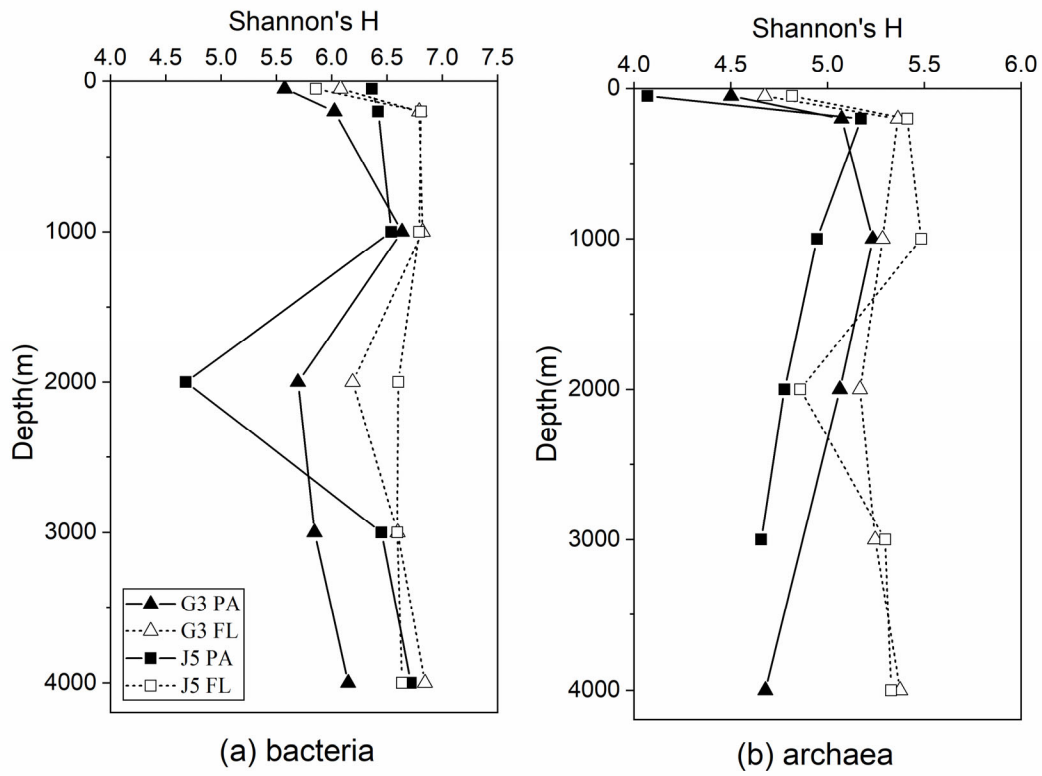

954

955 **Figure 2.** Shannon's diversity index calculated for all bacterial and archaeal communities of  
956 seawaters collected from G3 station and J5 station in the South China Sea.

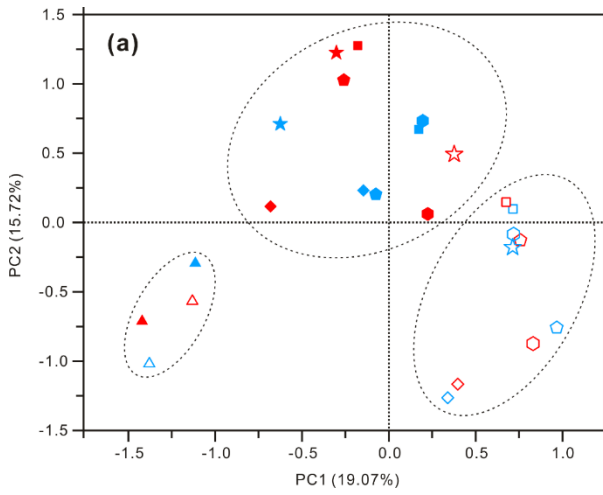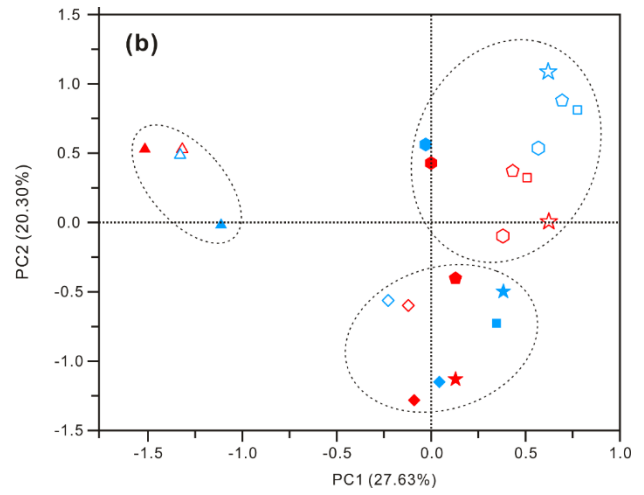

957

958

959

960

961

**Figure 3.** Results of PCoA analysis for particle-attached and free-living microbial fractions collected from seawater columns of the South China Sea. (a) PA and FL bacteria; (b) PA and FL archaea. Triangle: 50 m; rhombus: 200 m; hexagon: 1000 m; star: 2000 m; square: 3000 m; pentagon: 4000 m. Blue color: J5 station; red color: G3 station. Filled: particle-attached fraction; open: free-living fraction.

962

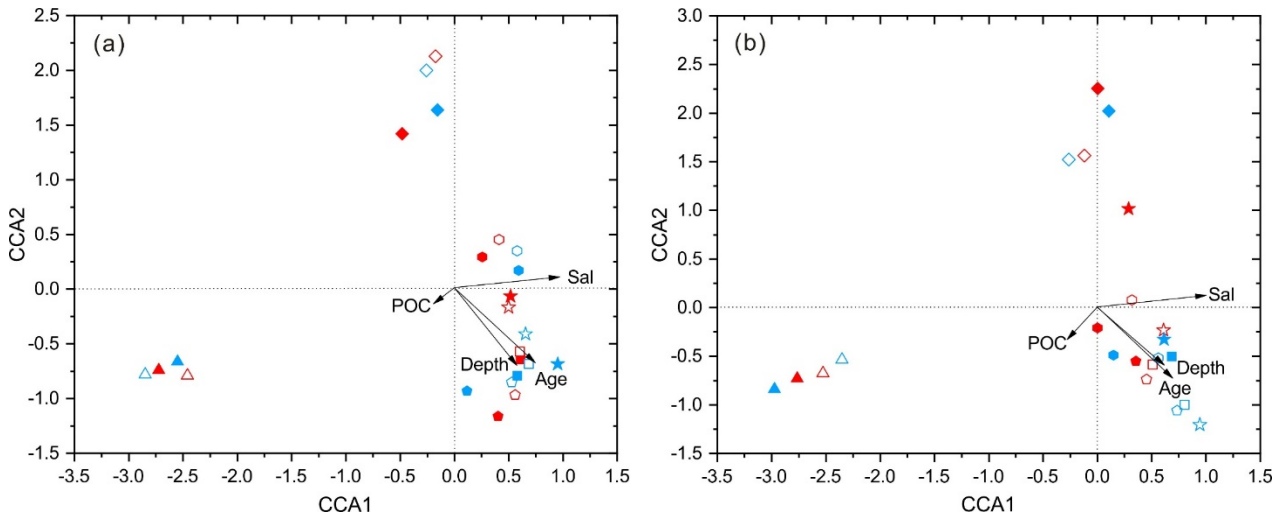

963

964 **Figure 4.** Results of CCA analysis to correlate several environmental factors including POC, seawater age,  
965 salinity and depth to PA and FL microbial communities collected from seawater columns of the South China  
966 Sea. (a) PA and FL bacteria; (b) PA and FL archaea. Triangle: 50 m; rhombus: 200 m; hexagon: 1000 m; star:  
967 2000 m; square: 3000 m; pentagon: 4000 m. Blue color: J5 station; red color: G3 station. Filled: particle-  
968 attached fraction; open: free-living fraction.

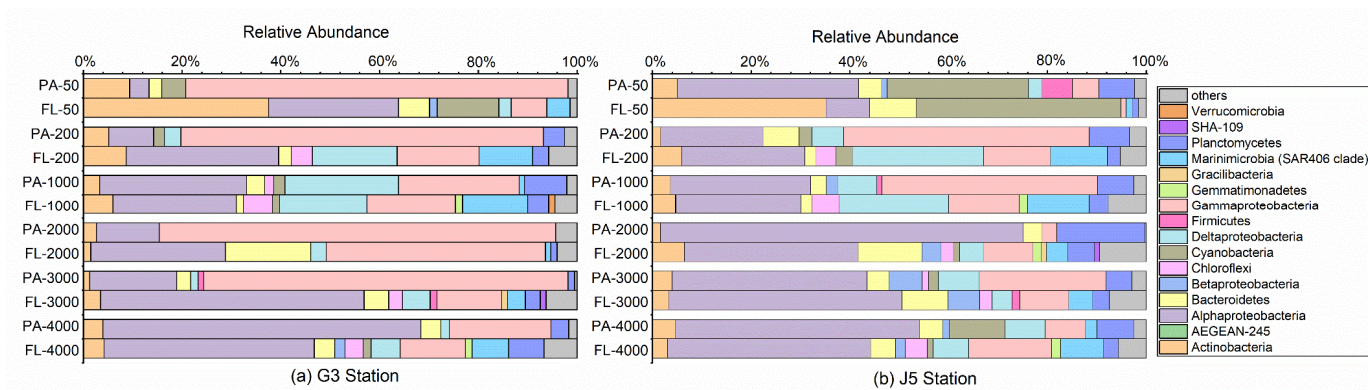

969

970 **Figure 5.** Taxonomic compositions of particle-attached and free-living bacterial communities of seawaters at  
 971 different depths along two different water columns in the South China Sea. (a) G3 station; (b) J5 station. The  
 972 phylum or class which has less than 1% proportions is classified into “others” (Fig. S4).

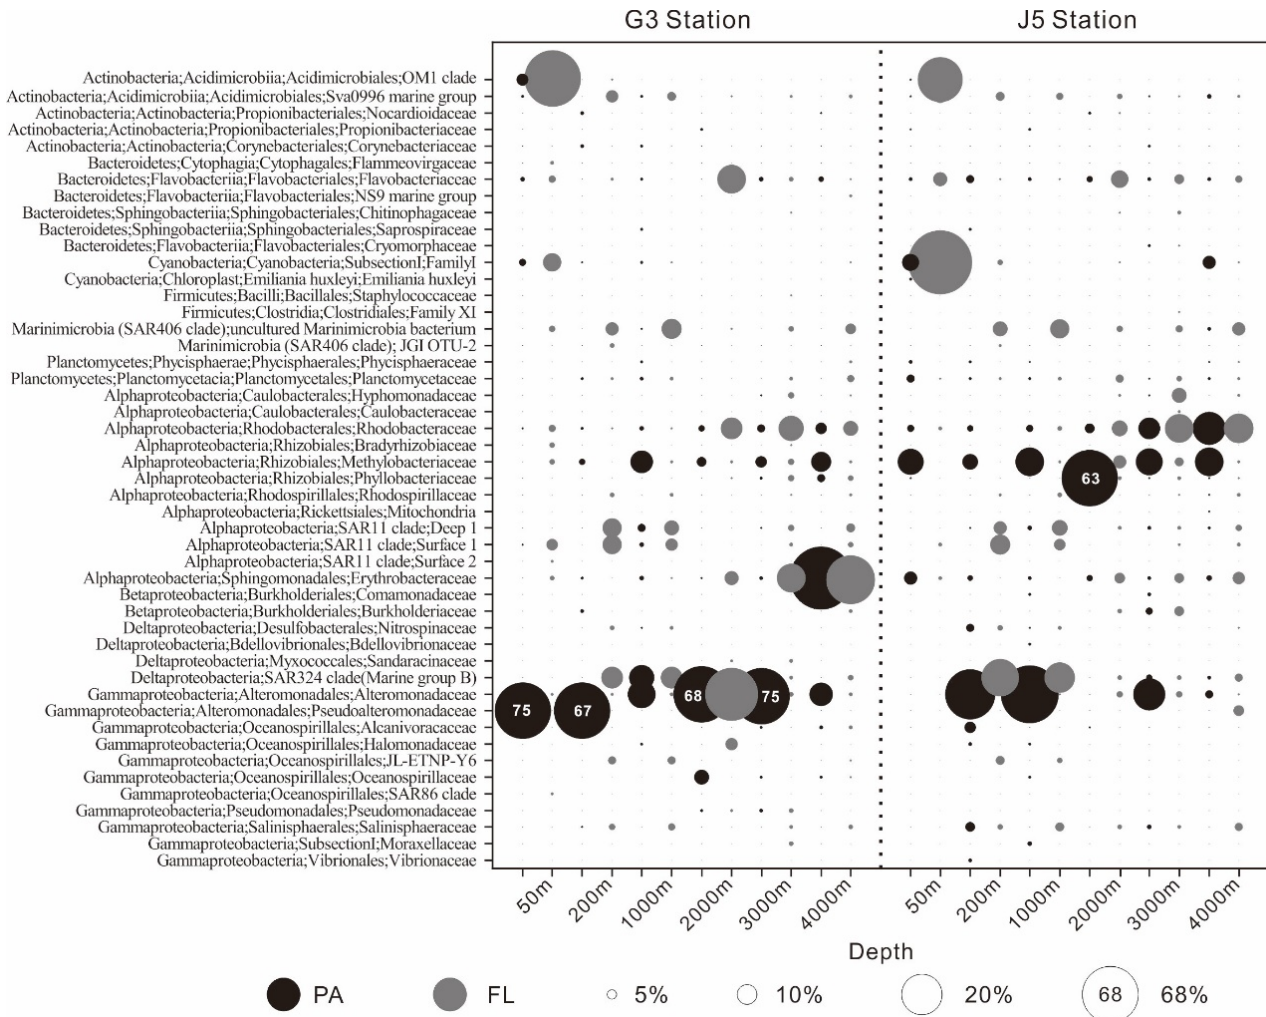

973

974 **Figure 6.** The relative abundances of families in particle-attached and free-living bacterial communities. Dark  
975 grey bubbles are the average relative abundances in the PA fraction, while light grey bubbles are the average  
976 relative abundances in the FL fractions. Scale is shown in the bottom, and the cycle with a number inside  
977 indicates actual relative abundance.



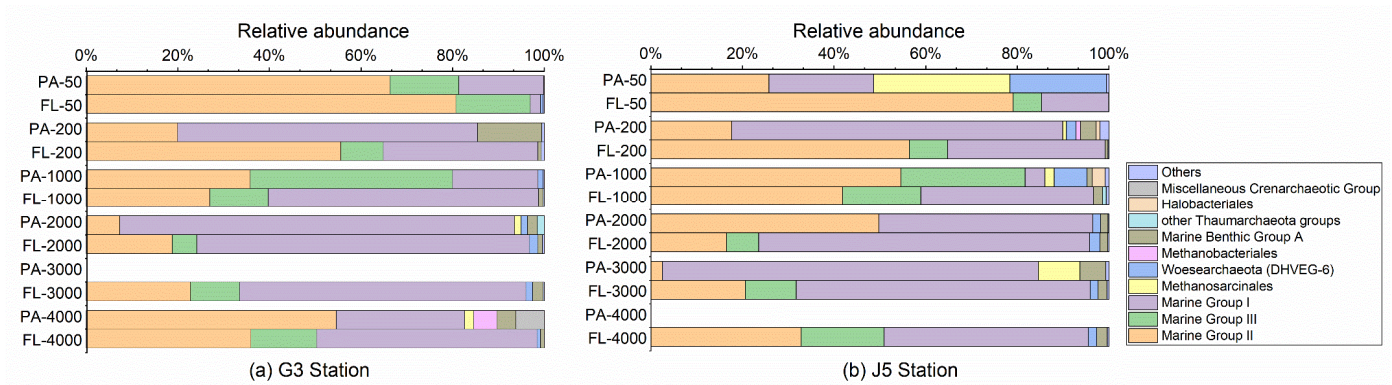

978

979 **Figure 7.** Taxonomic compositions of particle-attached and free-living archaeal communities of seawaters at  
 980 different depths along two different water columns in the South China Sea. (a) G3 station; (b) J5 station. The  
 981 archaeal lineages, at ~ phylum or class level, with less than 1% proportions is classified into “others” (Fig. S5).



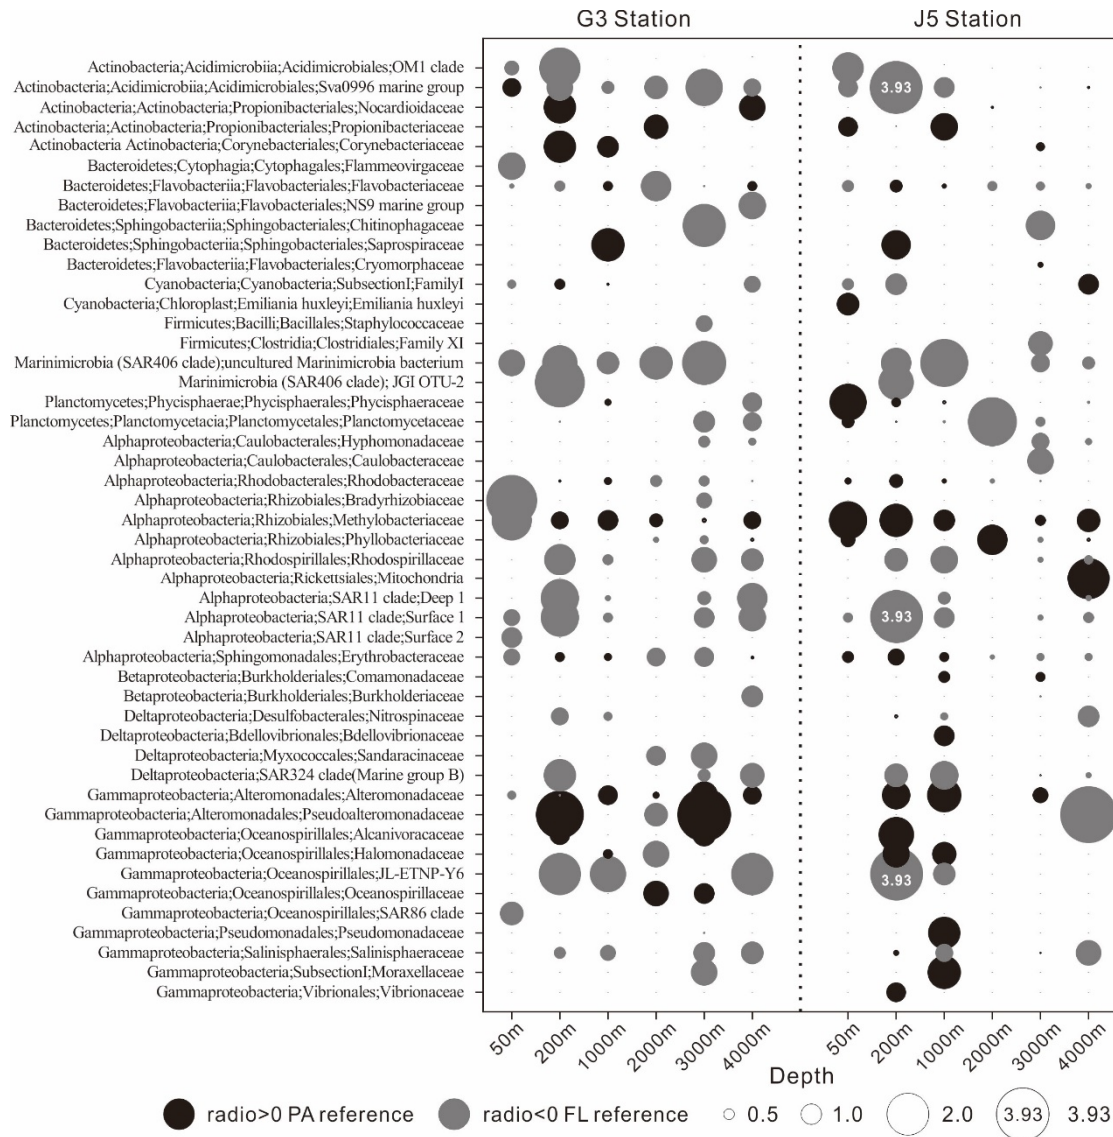

982

983 **Figure 8.** Odds ratio for each of the families with relatively abundant proportions in each sample.  
984 Dark grey bubbles represent the clades with a positive odds ratio, meaning the preference of PA  
985 lifestyle. Light grey bubbles represent the clades with a negative odds ratio, indicative of the FL  
986 preference. Scale is shown in the bottom, and the circle with a number inside indicates actual ratio  
987 (not proportional).

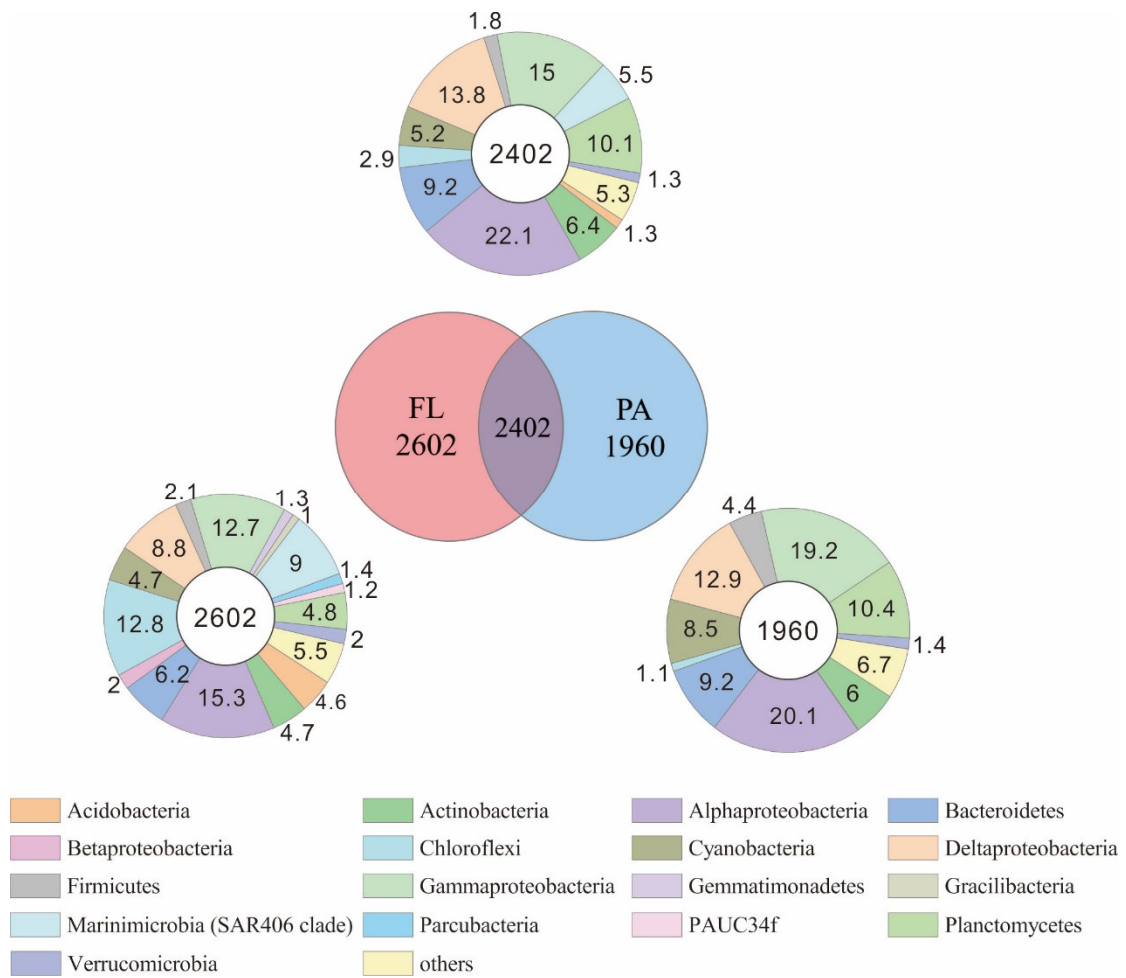

988

989 **Figure 9.** Numbers of each OTU sets including those exclusively found in PA fraction, FL fraction,  
 990 and those shared by PA and FL fractions. Pie charts represent relative proportions of each bacterial  
 991 lineages at phylum/class level.

992

993

**Table 1.** Environmental parameters of the water columns at different depths of G3 and J5 stations in the South China Sea

| Depth<br>(m) | G3 station |             |      |            |             |             |               |                                      |                                       |                       | J5 station |             |      |            |             |             |               |                                      |                                       |                       |
|--------------|------------|-------------|------|------------|-------------|-------------|---------------|--------------------------------------|---------------------------------------|-----------------------|------------|-------------|------|------------|-------------|-------------|---------------|--------------------------------------|---------------------------------------|-----------------------|
|              | T<br>(°C)  | Sal.<br>(‰) | pH   | DO<br>(uM) | DOC<br>(μM) | POC<br>(μM) | Ages*<br>(yr) | NO <sub>3</sub> <sup>-</sup><br>(μM) | PO <sub>4</sub> <sup>2-</sup><br>(μM) | Silicat<br>es<br>(μM) | T<br>(°C)  | Sal.<br>(‰) | pH   | DO<br>(uM) | DOC<br>(μM) | POC<br>(μM) | Ages*<br>(yr) | NO <sub>3</sub> <sup>-</sup><br>(μM) | PO <sub>4</sub> <sup>2-</sup><br>(μM) | Silicat<br>es<br>(μM) |
| 50           | 25.80      | 33.81       | 8.02 | 204.3      | 63.07       | 1.5         | 109           | BD                                   | BD                                    | 2.27                  | 23.60      | 33.88       | 8.02 | 204.8      | 67.77       | 1.6         | 108           | 0.12                                 | BD                                    | 2.36                  |
| 200          | 15.46      | 34.54       | 7.75 | 115.1      | 53.02       | 0.8         | 106           | 17.98                                | 1.20                                  | 21.06                 | 14.27      | 34.52       | 7.72 | 116        | 49.99       | 0.9         | 106           | 19.13                                | 1.30                                  | 26.56                 |
| 1000         | 4.68       | 34.51       | 7.51 | 85.5       | 49.34       | 1.2         | 1170          | 37.16                                | 2.72                                  | 114.40                | 4.46       | 34.53       | 7.51 | 82.3       | 45.62       | 2.1         | 1310          | 37.04                                | 2.73                                  | 121.93                |
| 2000         | 2.52       | 34.61       | -    | -          | -           | 1.1         | 1190          | -                                    | -                                     | -                     | 2.49       | 34.61       | 7.52 | 102        | 41.67       | 0.9         | 1670          | 38.41                                | 2.81                                  | 151.46                |
| 3000         | 2.36       | 34.62       | -    | -          | 42.94       | 1.8         | 1600          | -                                    | -                                     | -                     | 2.36       | 34.62       | 7.52 | 109.7      | 40.34       | 0.7         | 1680          | 38.16                                | 2.79                                  | 145.03                |
| 4000         | 2.39       | 34.63       | 7.52 | 115.1      | 42.44       | 0.7         | 1750          | 38.48                                | 2.82                                  | 141.81                | 2.43       | 34.62       | 7.53 | 111.8      | 46.52       | 1.2         | 1610          | 38.58                                | 2.78                                  | 145.06                |

994 \* $\Delta^{14}\text{C}$  ages; BD: Below detection; -: no measurement.
